# Supplementary material for: Emergence of visible light optical properties of L-phenylalanine aggregates
Source: PeerJ. 2019 Feb 25;7:e6518. doi: 10.7717/peerj.6518 (PMC6394350; doi:10.7717/peerj.6518)
Supplement: Supplemental Information 1 [file peerj-07-6518-s001.xlsx]

## Sheet: Sheet1
Wave	Start	End		Start	End		Start	End
470	9.31828	83.1985		10.5193	79.2137		13.1445	79.1259
471.06	9.59993	78.8858		10.532	76.6963		13.1456	75.0846
471.96	9.93638	75.9995		10.6033	73.557		13.1325	72.5058
473.03	10.2659	73.3782		11.232	71.105		13.2615	70.4184
473.93	10.2906	70.9403		11.7549	68.8591		13.173	68.0124
475	10.5642	68.7573		12.2443	66.4484		13.3122	65.4456
476.06	10.953	67.5784		12.3734	64.0082		13.3238	63.8527
476.96	11.0809	65.9651		12.4606	62.8392		13.4525	62.8788
478.03	11.0734	65.0439		12.7687	62.4589		13.4712	62.1745
478.93	11.0828	65.5093		13.1257	63.7045		13.9055	62.6473
480	11.2109	68.8933		13.2646	67.1408		14.0655	65.8064
481.06	11.1491	73.4476		13.3522	71.9157		14.2793	70.6327
481.96	11.4009	78.6294		13.4801	76.2896		14.7837	75.4268
483.03	11.5086	82.6214		13.3369	79.7004		15.5238	78.7746
483.93	11.4501	84.7506		13.2493	82.2718		15.5957	80.5127
485	11.4133	83.9032		13.072	81.7554		15.3265	79.265
486.06	11.7457	80.9464		13.0299	78.3949		15.0429	76.6772
486.96	11.9491	76.5353		12.6825	73.4639		14.8309	72.4896
488.03	11.7533	72.181		12.4842	69.1582		14.4194	68.8135
488.93	11.6353	68.4911		12.219	65.3865		14.2946	64.3189
490	11.4491	64.4739		12.0758	61.5467		14.0643	60.3523
491.06	11.4588	59.7817		11.849	57.6168		13.8209	55.8753
491.96	11.4661	54.5023		11.5431	53.0882		13.182	52.1495
493.03	11.3846	50.5884		11.5117	49.2173		12.7132	48.4151
493.93	11.1587	47.1305		11.399	45.5937		12.3707	45.0545
495	11.0841	44.1843		11.3292	42.6428		12.4326	42.1893
496.06	11.1874	41.4057		11.1382	39.9259		12.1616	39.9319
496.96	10.9979	39.5103		11.051	37.976		11.8945	38.151
498.03	10.955	38.074		10.9427	36.4936		11.7217	36.8852
498.93	10.8083	36.6201		10.7349	35.1043		11.5521	35.264
500	10.7575	35.3137		10.5312	33.8369		11.2797	33.7741
501.04	10.6393	34.1686		10.3893	32.743		11.1325	32.2584
501.94	10.6609	33.2014		10.3652	31.7495		11.0778	31.5464
502.98	10.3957	32.1032		10.2493	31.0144		10.8004	30.6254
504.02	10.2353	31.0021		10.268	29.9823		10.5386	30.0765
505.07	10.3055	30.5494		10.2406	29.2078		10.3732	29.4017
505.97	10.4526	30.3989		10.2972	28.6289		10.5065	29.243
507.01	10.3507	30.1965		10.2043	28.7483		10.5031	28.6135
508.05	10.182	29.7638		10.2204	28.7695		10.3802	28.5076
508.95	10.0309	29.5448		10.0472	28.3778		10.1775	28.161
510	9.9779	29.0866		9.90287	27.7555		10.2068	27.925
