# Supplementary material for: Emergence of visible light optical properties of L-phenylalanine aggregates
Source: PeerJ. 2019 Feb 25;7:e6518. doi: 10.7717/peerj.6518 (PMC6394350; doi:10.7717/peerj.6518)
Supplement: Supplemental Information 5 [file peerj-07-6518-s005.xlsx]

## Sheet: 0 days
Wave	200	205	210	215	220	225	230	235	240	245	250	255	260	265	270	275	280	285	290	295	300	305	310	315	320	325	330	335	340	345	350	355	360	365	370	375	380	385	390	395	400	405	410	415	420	425	430	435	440
252.03	0	0	0	0	0	0	0	0	0.0418371	0	0	0	0	0.385085	0.493612	0	0	0	0.109996	0.0978913	0	0	0	0	0	0.0600861	0.0166152	0	0	0	0.0331027	0	0	0	0	0	0	0	0.059553	0.00536559	0	0.0325098	0	0	0.0204391	0.056258	0	0	0.0161589
252.96	0	0	0	0	0	0	0	0	0.0300993	0	0	0	0	0.127136	0.55927	0.0332799	0	0	0.00625663	0.0198305	0.0352187	0	0	0	0	0	0	0	0	0	0.0468533	0	0	0.0184202	0.0518099	0	0.00680162	0.0570114	0.0394057	0.00253899	0.0528333	0.0172529	0	0	0	0.0174306	0	0	0.0126042
254.06	0	0	0	0	1.45772	0	0	0	0.0326812	0	0	0	0	0.0239886	0.424585	0.0416558	0	0.00870226	0.00686843	0	0.0140943	0	0.00174522	0	0	0	0.10469	0	0.00288156	0	0.180735	0	0	0.0610575	0.0348961	0.0475747	0	0.108344	0	0	0.0251227	0	0	0	0	0	0.00845067	0	0
255	2.15691	2.25845	0.0480571	2.19974	0.810825	0.0642512	0	0	0	0	0	0	0	0.0381298	0.173992	0	0.144832	0.0232238	0	0.00643565	0	0	0.0219557	0.0288374	0	0	0.0904295	0	0.0595753	0.0526244	0.103001	0	0.0448875	0.0408968	0	0	0	0.0597572	0	0	0	0	0	0.0531195	0	0	0	0	0
255.93	1.81462	0	0.127649	2.45491	0	0	0.194352	0	0	0.0161233	0	0	0	0.21764	0.233708	0	0.206193	0.0805172	0	0.0319743	0	0	0.0422312	0	0	0	0	0	0	0.080788	0.0743174	0	0.0201876	0	0	0	0.097956	0	0	0	0	0	0	0	0.00779028	0	0	0.0156292	0.0234458
257.03	1.04553	4.00763	0.828526	0.256108	0	0	0.0789303	0	0.0892068	0.280294	0	0	0	0.0194364	0.275853	0	0.0255319	0	0	0.0174411	0	0.0129423	0.00967022	0	0	0	0	0	0	0	0	0	0	0	0	0	0.12504	0	0	0	0	0	0	0	0	0	0	0	0.0460737
257.96	1.78881	0	2.24851	1.14179	0	0	0	0	0	0.429069	0	0	0	0	0.290714	0.157844	0	0	0	0.122133	0	0	0.105625	0	0	0	0.0132533	0	0	0	0	0	0	0.0210725	0	0	0.0852998	0	0	0.00392235	0	0	0.0352272	0	0	0	0	0.0123959	0.023946
259.06	0	0	4.52526	2.77707	0	0	0	0	0	0.291467	0	0	0	0	0.191074	0.146481	0	0	0	0.114371	0	0	0.0487003	0.0494281	0	0	0	0	0.0350842	0	0	0	0	0.0352883	0	0	0.0278496	0	0.00107509	0.0234682	0	0	0.00253781	0.00830432	0	0	0	0.028229	0.0093504
260	0.195303	0	0	1.06808	0.546382	0	0	0	0	0.499308	0	0	0	0	0.310086	0	0	0.0261063	0	0	0.0303732	0	0.0768693	0	0	0	0	0	0	0	0	0.0540834	0.0829195	0.0161372	0	0	0	0.0151684	0	0.0203399	0	0	0.0645891	0.00522522	0	0	0	0.0844367	0
260.93	4.17164	0	0	0	0	0	0.630603	0	0	0.539022	0.0423611	0	0	0	0.259043	0.0506081	0	0	0.0644907	0	0.125326	0.0367022	0	0.0312245	0	0	0	0	0	0	0	0.0425832	0	0	0.0229172	0	0	0	0.0077162	0.0335829	0	0.00813196	0.106501	0.0172192	0	0.00729869	0.0103772	0.0666176	0.0170001
262.03	0	1.62846	0.973203	0.965301	0	0	1.04709	0	0	0.77794	0.480585	0	0	0	0.240299	0.0390015	0	0	0.00268412	0	0.0369513	0.0747336	0	0.0226815	0	0	0	0	0	0	0	0.0730112	0	0	0.0132003	0	0.00505513	0	0.00841235	0	0	0	0.0460444	0.0728553	0.0157044	0.0062791	0.0275353	0.0272801	0
262.96	0	5.71201	0.914282	0	0	0.224303	1.52803	1.04194	0	1.33551	1.32283	0	0	0	0	0.0901433	0	0	0	0	0.00524108	0.0547937	0	0	0	0	0	0	0	0	0	0.0303263	0	0	0	0	0	0	0	0	0.0140764	0	0	0.120511	0	0	0	0.0191211	0
264.06	0	2.78792	0	0	0	0.96692	2.01052	2.5389	0.0728576	2.13457	2.54475	0	0	0	0	0.0488737	0	0	0	0	0.0112307	0	0	0	0	0	0	0	0	0.0505052	0.0852222	0.04699	0	0	0	0.0136091	0	0	0	0	0	0	0	0.0785872	0	0.000621049	0	0	0
265	0.111844	0	0	0	2.39039	2.47063	3.44518	3.87318	2.63763	3.33787	4.13121	3.33088	0	0	0	0.38855	0	0	0	0	0.0938929	0	0	0.0913895	0	0	0.0232078	0	0	0.0509116	0.0130574	0.0538559	0.00727675	0	0	0.0794423	0	0	0.041096	0	0.00224063	0.0664088	0	0.0243241	0	0.0240782	0	0	0.0153065
265.93	0	0	0.23866	0	4.49833	4.98747	6.1346	8.32861	8.19646	7.35089	7.43172	6.88229	0	0	0	0.941371	0	0	0	0	0	0	0.0360387	0.175693	0	0.022168	0.089601	0	0.0422276	0.0334709	0	0.0491562	0	0	0	0.0542945	0	0.0530521	0.0766546	0	0	0.0691119	0	0	0.0327024	0.0122794	0.0100961	0	0.0339256
267.03	0	0	1.58562	3.04302	7.37432	9.5134	12.0309	15.6255	18.4402	16.0596	13.9638	14.0019	6.18368	0	0	2.27568	0.0622354	0	0	0	0	0	0	0.16893	0	0.0348511	0.086308	0	0	0	0	0	0	0	0	0	0	0.0582845	0.0599034	0	0.0126422	0	0	0.0241008	0.0201311	0	0	0	0.0402904
267.96	0	0	0.512278	7.47406	7.39109	15.7821	22.3531	29.3722	35.7297	30.5948	25.6832	25.8811	25.7439	0	0	4.50438	0.390186	0	0.0995231	0.00459265	0	0.129832	0	0.0944435	0	0	0	0	0	0.0129415	0.0273302	0.0231097	0	0	0	0	0.00885479	0.0146939	0	0	0.0101063	0	0	0.0666153	0	0	0	0.0300549	0
269.06	7.06495	0	3.67836	13.4948	13.4669	27.5552	36.7558	49.2738	57.5422	49.8886	42.9573	42.9291	46.7421	0	0	6.10414	0.449936	0	0.0513004	0.0864709	0	0.0488082	0	0.0294536	0	0.0211656	0	0	0	0.0178281	0.0172575	0.0654778	0	0	0	0.0567539	0.0290814	0.0309256	0.0130083	0	0.0743059	0.0399	0	0.00918674	0	0	0	0.0312901	0
270	18.5897	7.0934	14.3091	21.4868	23.3636	43.8613	53.757	74.5219	84.4477	72.7116	63.7843	63.1829	70.2037	7.28226	0	6.23086	0.592767	0.192282	0	0.206923	0.150448	0	0.165171	0.105272	0	0.0794946	0	0	0	0	0.0137565	0.0545688	0.0188694	0	0	0.0501272	0.0447462	0.0575644	0.0273338	0	0.101652	0.0829192	0.0627862	0	0	4.21959e-06	0	0	0
270.93	23.2537	31.5664	32.3553	29.7759	36.3766	60.7637	75.941	102.793	116.362	104.441	90.6316	89.4479	97.9549	70.4753	0	2.95008	0.941068	0.290133	0	0.230484	0.199244	0	0.18245	0	0.0650826	0	0.00135672	0.229901	0	0.0323885	0.155075	0	0.0761106	0.0504091	0	0.0257005	0.130754	0	0.0221075	0	0.0773209	0.0353067	0	0	0.00193895	0	0	0	0
272.03	28.6056	34.1155	39.1353	40.7445	48.7224	78.8924	101.048	135.262	153.589	139.517	118.962	118.918	127.486	126.527	0	0	1.37695	0.256744	0.106933	0.236155	0.254405	0.240986	0	0	0.355035	0.0201719	0.391553	0.273648	0.218106	0.149324	0.136284	0	0.0996092	0.0770413	0.0561175	0.0298091	0.0981064	0	0	0	0	0	0	0	0.00675426	0	0	0	0
272.96	23.4491	34.5529	38.9998	48.908	59.8438	97.6069	126.11	166.618	190.675	174.61	148.61	149.65	157.841	172.528	9.57269	0	2.5214	0.122608	0.29079	0.208482	0.0956673	0.240257	0.11396	0.119879	0.24575	0.142702	0.515025	0.333006	0.206031	0.151437	0.204711	0.0402481	0.0752773	0.119173	0.0600216	0.0287563	0	0	0.011708	0.0155356	0	0	0	0	0.00400192	0	0	0	0
274.06	35.2664	27.8177	43.4399	52.4251	67.6825	114.001	144.823	193.622	222.997	201.143	173.006	174.131	184.442	204.44	79.2734	0	3.662	0.227797	0.219632	0.263858	0.112103	0.0904062	0.428717	0.587031	0.340132	0.360835	0.404726	0.231019	0.219496	0.10896	0.274443	0.134835	0.0642011	0.133865	0.0318647	0	0	0	0.0585957	0	0.0109155	0	0	0.0498333	0.00564826	0	0	0	0
275	44.458	37.443	56.3355	57.8834	77.45	125.759	159.939	215.802	247.82	224.613	192.631	193.015	206.358	229.642	135.908	0	3.45469	0.311666	0.171971	0.376762	0.0719246	0.112773	0.502672	0.616609	0.498796	0.498282	0.339958	0.177431	0.321392	0.282925	0.430851	0.0911323	0.10096	0.164642	0.0435761	0.00764234	0	0	0.02817	0	0.0965264	0	0	0	0	0	0	0	0
275.93	50.8278	51.5417	54.1568	61.3839	81.4608	133.356	173.86	233.414	267.463	242.062	208.432	207.081	224.449	246.228	175.131	0	0.80984	0.474706	0.254001	0.361256	0.073167	0.190294	0.400689	0.543644	0.574269	0.649066	0.341739	0.0492118	0.51017	0.281865	0.189535	0.13459	0.156301	0.134859	0	0.0115934	0.071508	0	0	0	0.0370185	0	0.000453026	0.00814362	0.00230086	0.00375484	0	0.0266402	0
277.03	51.0988	60.9076	54.8584	72.6435	84.9638	144.571	187.001	248.959	284.593	259.034	226.055	223.618	239.262	265.002	202.981	0	0	0.538095	0.22876	0.353534	0.134459	0.171842	0.430696	0.482287	0.665805	0.510102	0.2707	0.281015	0.399378	0.296427	0.240566	0.113219	0.235944	0.202692	0	0	0	0	0	0.0435241	0.0169257	0	0	0	0	0.0132291	0	0.0390768	0
277.96	49.5574	64.7109	59.4938	76.9041	91.3219	156.055	198.612	265.509	302.943	277.114	243.382	239.655	256.599	283.436	226.352	0	0	1.17123	0.223312	0.346879	0.119703	0.331679	0.372662	0.412824	0.712847	0.495725	0.349258	0.141569	0.496929	0.389375	0.233705	0.104975	0.234844	0.291385	0	0	0	0	0	0.0505634	0.0651799	0	0	0.00576057	0.0347245	0	0	0.0312713	0
279.06	48.6041	62.206	68.2749	77.0476	97.5422	164.528	209.919	282.493	320.635	294.632	256.548	250.414	270.809	300.864	243.593	2.42775	0	1.73506	0.165065	0.258985	0.34855	0.339579	0.283071	0.559108	0.645607	0.323095	0.611815	0.104311	0.389574	0.459505	0.490663	0.202048	0.13763	0.229554	0	0	0	0	0	0.00101439	0.0040211	0	0	0.0272549	0.0252099	0	0	0.016104	0.0345714
280	59.6593	64.1874	78.4569	79.8996	102.93	170.874	219.032	294.669	334.437	304.776	264.683	257.238	283.788	310.982	253.772	24.1326	0	2.53942	0.434555	0.190848	0.592359	0.244699	0.30595	0.487396	0.455652	0.129695	0.645787	0.22982	0.402407	0.417401	0.358629	0.313501	0.118287	0.191757	0	0	0	0.0804763	0	0	0	0	0	0.0861586	0	0	0	0.0467505	0.0251878
280.93	64.8179	61.0335	80.113	90.8155	101.829	173.597	224.68	299.763	339.268	309.169	271.349	262.963	287.366	315.967	255.664	40.2909	0	0	0.520096	0.211172	0.708813	0.318776	0.413341	0.497847	0.557624	0.177375	0.601145	0.709417	0.314972	0.42689	0.300906	0.386211	0.140293	0.264683	0.024199	0	0	0.0789415	0	0.0589148	0	0	0	0.00611532	0	0.00719684	0	0	0
282.03	64.6215	59.4853	82.9211	97.5759	99.4884	172.909	224.32	302.106	342.101	309.885	271.917	265.113	285.634	316.188	257.479	49.5215	0	0	0.851628	0.368147	0.520828	0.656051	0.5309	0.405544	0.594418	0.6346	0.379603	0.599879	0.350667	0.497833	0.034571	0.184057	0.190399	0.289384	0	0	0	0.024761	0	0.0675979	0.0335043	0	0	0	0	0	0	0	0
282.96	60.6666	59.476	79.8127	91.7049	92.5457	167.822	219.586	300.862	336.902	307.829	269.162	260.963	279.372	309.733	255.776	53.8825	0	0	1.76386	0.197536	0.435587	0.666699	0.584998	0.433706	0.68611	0.623241	0.270634	0.549224	0.349991	0.488775	0.158052	0.214182	0.205676	0.211341	0	0	0	0	0	0.0738223	0	0	0.018306	0	0	0	0	0	0
284.06	54.1136	70.857	80.9648	83.5157	93.293	163.909	213.535	294.298	330.45	299.76	262.161	252.873	272.92	302.208	251.192	55.2742	0	0	2.65099	0.213972	0.191988	0.560853	0.509995	0.202295	0.758747	0.306797	0.348653	0.421383	0.288199	0.521924	0.1654	0.38898	0.210224	0.176578	0	0	0	0	0.0056694	0.0843	0	0.0155473	0	0	0	0	0	0	0
285	56.6371	58.2503	75.9153	82.1165	93.8652	162.623	210.686	283.622	320.203	290.408	254.748	246.789	265.358	295.192	244.993	55.1421	0	0	2.81432	0.226848	0.107442	0.533817	0.240884	0.349148	0.750712	0.188146	0.425101	0.382897	0.184769	0.277142	0.285876	0.409615	0.127428	0.218315	0.112814	0.00487514	0	0	0.0543013	0.101269	0	0	0	0	0	0	0	0	0
285.93	62.6785	54.3078	68.0238	87.0647	95.0161	162.877	208.462	277.313	313.694	282.453	247.039	241.838	257.292	290.499	239.167	54.6425	0	0	0	0.403182	0.00578036	0.507158	0.284557	0.358043	0.486455	0.639683	0.438131	0.186369	0.293794	0.266814	0.373284	0.288227	0.184147	0.286527	0.0944552	0	0.000494226	0	0	0	0	0	0.0398435	0.037961	0.0188099	0	0.0288153	0.00727498	0
287.03	66.9317	49.4414	67.6004	82.2719	93.0641	161.686	204.212	274.394	305.402	278.273	242.184	237.753	252.695	282.974	233.868	54.3164	0.990293	0	0	0.517041	0.16083	0.122376	0.181381	0.343938	0.297607	0.570619	0.440975	0.449165	0.525603	0.24934	0.351872	0.293713	0.171336	0.284076	0.0403412	0	0	0.0518048	0	0	0	0	0.0833161	0.0123182	0.0487449	0.0117047	0.0582255	0	0
287.96	62.4646	52.0759	65.9725	69.9691	88.3132	157.223	200.856	269.583	301.736	273.023	238.593	232.813	248.405	276.811	230.466	54.5443	7.58139	0	0	0.87476	0.194661	0.0467666	0.0462443	0.431351	0.32983	0.303304	0.617369	0.540108	0.563134	0.448101	0.195715	0.392565	0.177531	0.284597	0.0160207	0	0	0.034194	0	0	0	0	0.085462	0.0073836	0	0.0100796	0.0361444	0	0
289.06	53.1835	52.3877	63.0065	69.3889	87.1776	154.151	197.684	262.981	296.117	267.209	234.002	228.941	245.023	271.485	229.212	55.1628	10.324	0	0	2.09669	0.253568	0.155784	0	0.774073	0.47286	0.124824	0.571622	0.46208	0.40549	0.47081	0.103299	0.356275	0.0322703	0.0599046	0	0.0331355	0	0	0	0	0	0	0.00153913	0	0	0	0	0	0
290	36.7032	45.6548	51.462	72.7031	91.0848	151.526	194.259	257.276	288.285	259.537	228.586	224.557	239.341	265.414	223.619	55.0661	11.3643	0	0	2.06629	0.253377	0.244155	0.142384	0.720249	0.439222	0.468198	0.454466	0.460147	0.441819	0.368987	0.200549	0.221585	0.101429	0.0824126	0	0	0	0	0	0	0.0308336	0	0	0.0121698	0	0	0	0	0.0286615
290.93	28.8129	44.96	56.2672	73.6446	91.5409	147.661	187.034	246.893	275.112	249.603	220.869	215.698	231.15	255.295	214.767	54.2741	11.6476	0	0	0	0.169287	0.331607	0.19838	0.49663	0.450096	0.541367	0.350733	0.620034	0.531393	0.0915772	0.35325	0.286659	0.245675	0.124086	0	0	0	0	0	0	0	0	0	0	0	0	0	0	0.0586295
292.03	21.6817	44.1919	65.3859	63.3304	86.6376	139.503	176.733	232.321	260.437	237.305	209.569	205.201	220.421	241.61	203.356	53.4074	12.0868	0	0	0	0.383085	0.41064	0.188213	0.435192	0.341201	0.548537	0.23821	0.651041	0.558266	0.171895	0.331019	0.262954	0.256706	0.296279	0	0.0474734	0.0432473	0.0540048	0	0	0	0	0	0	0	0.0298762	0	0	0.0186852
292.96	31.794	48.173	61.988	57.6777	80.6208	130.086	165.345	217.793	246.748	226.379	197.706	193.59	208.438	227.734	193.915	52.1481	13.074	4.43725	0	0	1.53068	0.615424	0.210013	0.384956	0.392758	0.384135	0.267455	0.530242	0.350908	0.265771	0.275864	0.290512	0.110116	0.309117	0	0	0.0883273	0.0471028	0	0	0.0683434	0	0	0	0	0.0165144	0	0	0
294.06	41.3967	49.5554	60.5481	55.0305	77.2953	125.092	157.315	208.459	236.19	213.996	187.134	184.217	195.737	215.4	184.639	50.3802	13.844	6.56797	0	0	3.09334	0.391925	0.169692	0.184544	0.29696	0.27174	0.284896	0.341463	0.279973	0.228071	0.169065	0.111446	0.0424741	0.223135	0	0	0.0703037	0	0	0	0.0887314	0	0	0	0	0	0	0	0
295	43.497	52.9751	55.0918	58.1821	70.0809	121.687	152.899	200.369	224.626	202.85	177.858	172.235	184.668	204.719	176.222	48.973	14.6209	6.92385	0	0	1.90706	0.145738	0.0241611	0.0751207	0.217834	0.0900734	0.447257	0.325466	0.212423	0.09392	0.218669	0.0941912	0.119395	0.127098	0	0	0.0379414	0	0	0	0.0126156	0	0	0.0297088	0	0	0	0.0010481	0
295.93	29.5323	51.3719	51.5939	51.7152	67.1864	118.544	147.977	190.109	212.456	194.826	167.632	162.574	176.536	193.478	167.331	48.1301	14.9004	7.30115	0	0	0	0	0.0552761	0.0992253	0.107619	0.175914	0.316937	0.325312	0.285924	0.137204	0.0834385	0	0.147955	0.138588	0	0	0.0418165	0.043448	0.0587117	0	0	0	0	0.0312437	0.0158768	0	0	0.0146619	0
297.03	16.7499	38.0547	49.5114	47.3082	63.7356	112.261	139.997	182.065	201.182	183.952	158.09	154.784	169.009	184.347	159.522	47.6017	15.5305	7.68647	0	0	0	0.123971	0.0911714	0.228745	0.316152	0.120469	0.200007	0.373916	0.250299	0.219057	0.0507985	0.107215	0.0620612	0.171359	0	0	0.0926921	0	0.0144028	0.0161434	0	0	0	0.0282913	0.0282249	0	0	0.0217168	0
297.96	17.0065	45.3992	47.4486	45.1777	62.6804	105.611	131.819	172.064	189.253	170.516	150.198	148.856	159.99	174.641	151.356	46.0585	15.8108	8.04377	0.050172	0	0	0.99324	0.242569	0.271741	0.45342	0.101264	0.110579	0.332228	0.404949	0.248966	0	0.0670705	0.105177	0.169089	0	0	0.035789	0	0.041769	0.0524974	0	0	0	0.0431639	0	0	0	0.0358675	0
299.06	32.5712	42.7007	39.4387	50.5112	52.9926	99.4296	126.319	163.726	180.061	160.68	142.918	140.189	150.485	165.919	143.297	44.9635	16.264	8.14205	1.79239	0	0	2.41784	0.00591445	0.108717	0.314021	0.13963	0.112835	0.257219	0.226596	0.141516	0.0613049	0.278057	0.0946269	0.167643	0	0.05773	0	0	0	0.0301605	0.00751124	0	0	0.0784064	0	0	0	0.0467466	0
300	35.5753	35.473	28.4831	44.5475	47.8757	97.2567	121.669	152.553	169.787	153.937	135.563	131.343	142.059	157.664	135.824	43.4199	16.3356	8.42354	2.27298	0	0	0.937003	0	0.106836	0.191551	0.278478	0.388655	0.255481	0.165856	0.0588974	0.0652181	0.115983	0.148093	0.222482	0	0.0388053	0	0.0531767	0.0296083	0.0040546	0.00396318	0	0.0214992	0	0	0	0	0.0279838	0
301.07	31.3859	20.8941	29.0134	41.543	45.0586	92.3117	116.529	144.972	160.216	145.093	127.52	123.96	133.242	149.852	128.584	41.9158	16.5952	8.89717	2.36139	0	0	0	0	0.203123	0.182781	0.503052	0.429729	0.244864	0.122902	0.0574207	0.0236731	0.158615	0.163884	0.246127	0	0.0584465	0	0.0765647	0.0537753	0	0.0109004	0	0	0	0.0143852	0	0	0	0
302	15.3797	22.6691	22.7222	34.1231	45.9295	85.3909	108.91	133.013	149.071	134.07	118.852	116.341	124.074	139.58	120.733	40.6202	16.814	8.74048	2.43383	0	0	0	0.404459	0.157421	0.0192122	0.402799	0.289859	0.25173	0.231783	0.0677243	0.00154617	0.128515	0.147243	0.168387	0	0	0	0.0205227	0.0482877	0	0	0	0	0	0.0149416	0	0	0	0
303.07	25.0718	23.6806	21.4836	31.8329	41.4336	79.8356	102.443	124.034	139.643	125.925	109.352	108.83	114.89	129.037	113.727	39.0798	16.98	8.6987	2.4026	0	0	0	1.3963	0	0.0700163	0.206168	0.196284	0	0.143015	0.177875	0.260121	0.199386	0	0.0573196	0	0	0	0	0	0	0.0385191	0	0	0.128995	0.00390048	0	0	0	0
304	25.0893	17.9978	24.1556	24.5513	37.9617	76.8396	95.2167	114.945	129.274	118.943	102.554	101.044	108.129	120.429	106.914	37.0669	17.1213	8.86099	2.42607	0.361179	0	0	2.92767	0	0.253121	0	0.292618	0	0.178679	0.255434	0.271262	0.0235392	0	0.0859046	0.123218	0	0	0	0	0	0.037183	0	0.021649	0.142339	0.0351737	0	0	0.0322526	0
305.07	30.5968	11.1986	26.3716	26.9409	38.6979	72.4068	89.8532	110.772	121.399	112.583	97.047	95.5974	103.02	113.373	100.95	35.4583	16.8542	9.23604	2.57887	0.669168	0	0	1.05496	0	0.255175	0	0.32207	0	0.28135	0.102038	0.0356216	0.0571415	0.112301	0.18971	0.0732938	0.0187829	0	0	0	0	0.0210723	0	0	0.0862524	0.0282963	0.00333807	0	0.066296	0
306	12.8049	15.2293	23.4438	29.8181	31.9627	65.1328	84.9544	103.581	114.809	104.997	91.868	90.256	97.5629	106.629	95.2347	34.2629	16.4195	9.31557	2.81202	0.827982	0	0	0	0	0.0820025	0.0247553	0.277609	0.0641795	0.362078	0	0.0865644	0.111417	0.152595	0.0582616	0.0193313	0.0849202	0.00261728	0.036599	0	0	0.00279093	0.00167882	0	0	0.0336756	0.0167364	0	0.0353468	0.0196353
307.07	6.86626	17.5654	16.7626	22.9355	30.5279	62.3667	82.0791	97.1539	108.75	98.582	85.9556	86.3431	91.632	100.16	90.8862	33.3919	16.1608	9.42006	2.95842	0.884475	0	0	0	0.541197	0	0.0999465	0.337252	0.123321	0.191083	0	0.163055	0.110853	0.0612252	0	0	0	0.00502971	0.0882417	0	0	0	0.0775301	0	0	0.0262559	0.0139738	0	0	0.0208394
308	3.81173	21.6562	30.3402	20.0895	27.9386	59.9517	76.5174	90.641	102.978	92.5557	79.771	80.0166	85.444	93.6437	86.2918	32.5976	16.1935	9.57997	3.00456	0.891675	0	0	0	1.48165	0	0	0.0616791	0	0.269265	0	0.293145	0.00772838	0	0	0.0454695	0	0	0.0774181	0	0	0	0.0446285	0	0	0.0468145	0	0	0	0.00237296
309.07	9.00705	19.7134	27.6244	21.3428	27.5748	57.7483	70.9814	87.6222	96.0667	86.6327	74.8341	74.1539	79.7528	89.1075	82.2974	31.9581	15.9219	9.40912	2.8576	1.00994	0	0	0	1.98482	0	0	0	0.00202625	0.251305	0.0693945	0.204489	0	0	0.00737413	0.00665534	0	0.0199467	0.0647614	0	0	0	0.000945821	0	0	0.0524824	0	0	0	0.0210403
310	5.05494	20.8323	26.1926	23.1422	24.6147	55.4061	68.0682	84.4444	89.9488	81.1782	71.5188	69.3848	75.1772	84.8248	78.175	30.8566	15.4391	9.07206	2.88315	1.00862	0.269083	0	0	0	0	0	0.018438	0.0424239	0.284689	0.157996	0	0	0	0.0624017	0.0204055	0.0571992	0.0730873	0.0467564	0	0.0501224	0	0	0	0.0734565	0.00659804	0	0.00068026	0	0.0163904
310.93	8.55674	5.17797	13.497	16.4856	26.0374	55.0125	65.8739	78.6213	84.2719	76.6752	68.6156	66.495	70.919	80.025	73.7487	29.5155	14.764	8.71724	3.21348	1.12805	0.225907	0	0	0	0	0.0514869	0.153415	0.18949	0.137959	0.154057	0	0.115753	0.0755952	0.11769	0	0.0881367	0.0214769	0.0316482	0	0	0	0	0	0.0899489	0	0	0.0234119	0.00352848	0
312.03	19.9362	10.8518	12.7953	19.7202	24.2895	50.9402	62.9631	73.9354	80.227	72.2573	64.5701	62.985	66.9121	75.1674	69.2159	28.4364	14.1493	8.84912	3.4524	1.29399	0.210524	0	0	0	0.165882	0.0833212	0.112236	0.33707	0.0743247	0.00799581	0.00269372	0.157064	0.0454669	0.0101247	0.0696757	0.0621878	0	0.0121365	0	0	0	0	0	0.0809153	0	0	0	0	0
312.96	17.238	14.0243	11.4981	18.0859	24.0351	45.9351	58.4258	69.225	75.8362	68.1986	60.0416	59.9174	62.3777	70.4984	64.5823	27.3858	13.9277	8.52667	3.28956	1.34087	0.334472	0	0	0	1.16211	0.287169	0.0219672	0.393358	0	0.0375602	0.110851	0.163798	0.100231	0	0.100168	0	0	0.00563225	0	0	0	0	0.0357522	0.0248116	0	0	0	0	0
314.06	13.8878	14.2131	15.7275	20.3341	22.9761	43.0186	54.7629	66.5818	71.419	64.1412	56.202	56.2106	59.2701	66.2258	61.7415	26.6718	13.6936	7.89951	3.17283	1.40827	0.491542	0	0	0	3.47313	0.0353539	0	0.34202	0	0.032448	0	0.051029	0.0817995	0	0.0643664	0	0	0.0709037	0	0.073015	0	0	0.0182067	0.0427968	0	0	0	0	0.0117098
315	0	4.40165	15.111	14.7166	22.1455	41.1084	52.3456	62.0997	67.4934	60.6018	52.3668	53.1944	56.3887	62.131	59.0533	26.1345	13.9136	7.55108	3.24779	1.43264	0.584227	0	0	0	0	0	0	0	0	0.140227	0	0.100335	0.0220358	0	0.0743592	0	0	0.0683873	0	0.0683316	0	0	0.016042	0.0425437	0	0	0.00166691	0	0.0366556
315.93	1.93569	11.35	12.9867	19.6047	20.3262	38.5444	51.0258	59.2639	63.2563	57.5231	49.7245	49.7686	53.3813	59.067	55.7649	25.1193	13.9836	7.36678	3.34938	1.55716	0.457148	0.0730175	0	0	0	0	0.0412986	0	0	0.115769	0	0	0	0.0227206	0.110036	0	0	0.02123	0	0	0	0	0	0	0	0	0	0	0.0264827
317.03	4.4259	18.7514	7.57093	18.1749	22.291	37.1423	48.6066	55.2181	60.2432	54.2214	47.6001	46.4362	50.4224	55.7818	52.2039	24.1945	13.8312	7.74576	3.6839	1.48729	0.427972	0.207764	0	0	0	0.175924	0	0	0.109953	0.0640015	0	0	0	0.0303237	0	0	0	0	0	0	0	0	0.0173431	0	0	0.0462732	0	0.0434065	0.013623
317.96	16.3351	13.2358	11.7725	16.5233	20.8649	35.8914	45.3822	52.0585	57.0397	50.4604	44.7489	43.0911	47.1928	53.2898	49.9155	22.8265	13.154	7.52077	3.65086	1.64883	0.469861	0.202931	0	0	0	0.615752	0	0	0.24362	0	0	0	0	0.0283988	0	0	0	0	0	0	0	0	0	0.0178137	0	0.0106439	0.0101439	0.0855768	0
319.06	13.4066	14.3802	18.0709	11.8741	20.3973	34.3809	43.0631	48.838	54.5369	47.4753	42.1812	41.8111	44.438	50.3187	47.6546	22.0532	12.9583	7.56268	3.4332	1.51305	0.522922	0.0477804	0	0	0	1.90557	0	0	0.145676	0	0	0	0	0	0	0.0368391	0	0	0	0	0	0	0.00249455	0	0.0190117	0.00695591	0.021648	0.0501478	0
320	11.9892	18.5969	13.0445	8.84411	16.9591	32.7691	41.2858	47.0428	50.2987	45.3333	39.5746	40.3217	41.619	46.8211	45.7723	21.306	12.7242	7.36449	2.98939	1.32654	0.522423	0	0	0	0	0	0	0	0.202052	0	0	0.00713659	0.0420904	0	0	0	0	0	0	0.0524937	0	0	0	0	0.000153013	0	0.00281898	0.00310362	0.013043
320.93	10.1774	9.21525	7.87764	6.17917	14.6348	31.3136	40.1569	45.2037	46.973	43.3436	38.0021	37.6786	39.7384	44.2881	43.5944	20.6183	12.2409	7.56348	2.89712	1.39968	0.545125	0.0869077	0	0	0	0	0	0	0.0221581	0	0	0.168185	0.191055	0	0	0	0	0	0	0.071771	0	0	0	0	0	0	0.00277198	0	0.0213866
322.03	10.3079	0	13.625	9.27946	11.6092	29.3503	37.7261	42.2739	44.6086	40.7733	35.4099	34.778	37.4975	42.007	41.731	19.69	11.6291	7.19532	2.90636	1.64931	0.716351	0.165129	0	0	0	0	0.21662	0	0	0.00901733	0	0	0.0835129	0.0939248	0	0	0	0	0.0201432	0.0211417	0	0	0	0	0	0.00880767	0	0.0164036	0
322.96	13.3406	2.88955	15.3264	12.3124	10.7815	28.7801	35.4303	39.8931	42.5143	38.1236	33.5884	33.4062	35.525	39.3935	39.0749	18.8466	11.4919	7.22148	3.13486	1.64266	0.715838	0.100865	0.039556	0	0	0	1.41329	0	0	0.0264269	0	0	0.0221738	0.0359508	0	0	0	0	0	0	0	0	0	0	0.0361314	0.0224115	0	0.00127378	0
324.06	15.4961	6.93439	15.5697	12.8557	10.8436	27.6513	33.6634	37.1705	39.917	35.9854	31.5886	32.4795	33.2842	36.9518	36.4398	18.2721	11.6601	7.46491	2.94418	1.53582	0.738676	0.112306	0	0	0	0	2.85288	0	0	0	0	0	0	0	0.0439063	0	0	0	0	0.0117229	0.0239381	0	0.0473394	0	0.0123256	0.0161256	0	0.0271528	0
325	3.26497	4.27328	11.8852	9.83769	13.1745	26.6152	32.8922	34.3279	37.915	34.0986	29.903	30.6705	31.7947	35.0648	34.3671	17.4162	11.5171	7.53423	3.06525	1.4681	0.717284	0.0932885	0	0	0	0	0	0	0	0	0	0.0788724	0.0698319	0.00575112	0	0	0.0151208	0	0	0	0	0	0.0335475	0	0	0.00533645	0	0	0
325.93	2.39121	7.285	0.472236	9.85522	10.8955	24.7301	30.8704	32.5459	36.6097	32.6856	28.409	28.0398	30.1091	33.5279	33.1607	17.0134	10.948	7.26281	3.52049	1.27283	0.894128	0.0326668	0	0	0	0	0	0	0	0	0	0.111683	0.00880987	0.0558328	0	0	0	0	0	0	0	0.00140568	0.0301791	0	0	0	0.0228534	0	0
327.03	0	3.71532	0	5.20304	9.07313	23.3097	29.1709	32.5941	33.932	30.9463	26.9082	25.9999	28.5037	31.705	31.8087	16.2715	10.1823	6.99435	4.10569	1.40055	0.877486	0	0.0568834	0	0	0	0	0	0	0	0	0.0966416	0.0194634	0.142171	0.0394015	0	0	0.115341	0	0	0	0	0	0.0696972	0	0	0.0308762	0	0
327.96	0	0	4.86474	0	9.79985	19.9059	27.9473	31.266	31.5754	28.95	25.2968	24.2952	26.5296	30.4009	29.7522	15.5273	9.93507	6.75309	3.88275	1.50231	0.8326	0.313334	0	0	0	0	0	1.16627	0	0	0	0.117954	0	0.0922665	0.182454	0	0	0.0889228	0.00939073	0	0	0	0	0.0475571	0	0	0.0572311	0.0169054	0
329.06	0	0	11.2196	0	11.1077	19.3718	26.1272	28.0692	30.0196	27.4804	23.5207	23.4298	24.9466	29.0213	28.3479	14.7231	9.71125	6.82259	3.59601	1.38696	0.633166	0.272881	0.00999123	0	0	0	0	3.38056	0	0	0	0.0597572	0	0.0234915	0.0204734	0.0511188	0	0	0.0484795	0	0	0	0	0.0325131	0	0	0.0207882	0.0344476	0
330	8.0175	0.454932	9.12889	5.78997	12.044	19.9574	23.9653	26.336	29.0744	26.1976	21.9652	22.0259	23.6323	27.6045	27.444	14.1229	9.74089	6.86466	3.38841	1.06059	0.592776	0.342721	0	0	0.0884908	0	0	0	0	0	0	0	0.0123784	0	0	0.0501611	0	0	0.0502746	0	0	0	0	0	0	0.0505918	0	0.0222109	0.0133156
331.07	7.8779	0	9.96452	5.73481	10.6799	21.0657	22.9063	25.6493	26.7607	24.9264	20.7821	21.0096	22.3686	25.7991	26.1327	13.7533	9.31852	6.76886	3.80584	1.21736	0.428869	0.410068	0.0462081	0	0	0	0	0	0	0	0	0	0.041564	0.0281849	0	0.0244684	0	0	0.0577044	0	0	0	0	0.0418575	0	0.0314813	0	0	0.0237171
332	3.09252	0	4.45058	2.12579	10.356	19.2222	22.6701	24.3581	24.7478	23.0762	19.7712	19.848	20.8156	24.0087	24.3269	13.1695	9.2161	6.44778	4.15112	1.39202	0.276062	0.451295	0.118801	0	0	0	0	0	0.0480321	0	0	0.0256706	0.0135305	0	0.0539521	0	0	0	0	0	0	0	0	0.0234998	0.00789018	0.0206933	0	0.000290709	0
333.07	0	8.98126	2.99937	2.52416	10.1974	16.8956	21.3117	23.3896	23.3963	21.511	18.8938	19.1665	19.8316	22.709	22.8816	12.6914	8.90884	6.33836	4.24657	1.44539	0	0.236379	0.0710001	0	0	0	0	0	1.67656	0	0	0.0377064	0	0	0	0	0	0.0140917	0	0	0	0	0.0259001	0.000973979	0.0297365	0	0	0	0
334	0	13.9868	0.65437	7.37379	5.45049	15.1701	19.7959	22.2982	22.6791	19.8499	17.7777	17.7325	18.689	21.8488	22.0264	12.1212	8.38321	6.33041	4.06407	1.44846	0.0648944	0.172581	0	0	0	0	0	0	2.17738	0	0	0	0	0	0	0	0	0	0	0	0	0	0	0	0	0.0355672	0	0	0
335.07	1.64892	0	0	5.68406	4.91803	14.0891	19.233	20.4997	21.926	18.8634	16.3122	16.4126	17.8529	20.6783	21.0429	11.6102	7.86222	6.24686	3.8429	1.64262	0.218162	0.11834	0	0	0	0	0	0	0	0	0	0	0	0	0	0.0637343	0	0	0	0	0	0	0	0	0	0.014875	0	0	0
336	3.22977	0	1.68026	6.08703	3.26187	13.8046	18.0071	18.3399	20.7848	18.3051	15.4501	15.1618	17.1299	19.0337	20.2451	11.2628	7.95214	6.16879	3.85777	1.76009	0.360657	0.23719	0.202801	0	0	0	0	0	0	0	0	0	0.0093896	0	0.0525633	0	0.0302308	0	0	0	0.0675374	0	0	0	0	0	0	0	0.0302849
337.07	0	8.00789	5.98958	1.225	1.588	12.5792	16.3427	18.2613	18.7568	17.2411	14.8164	14.5628	16.3634	17.6433	19.203	11.1091	8.21234	6.141	3.79391	1.94271	0.480883	0.2648	0.108243	0.143981	0.0386379	0	0	0	0	0	0	0	0	0	0	0	0.0876153	0	0	0	0.00753264	0.0274526	0	0	0	0	0	0	0.0227994
338	0	7.823	5.91168	0.809499	0.35526	12.9561	15.1891	17.3768	17.2835	16.1261	14.3604	13.965	14.7738	16.7207	18.0179	10.9938	7.79503	6.12756	3.76786	1.92599	0.568916	0.105567	0	0.104837	0.0736305	0	0	0	0	1.80587	0.0325394	0.0831357	0	0.0269269	0	0	0.0412219	0	0	0	0	0	0	0.0102067	0	0	0	0	0.0119621
339.07	4.60595	5.74894	5.01079	0	7.54771	13.4784	15.071	16.7423	16.5362	15.4102	13.3484	13.4457	13.6044	16.1492	16.7669	10.2409	7.37056	5.84157	3.63917	1.857	0.562105	0	0	0	0.0190239	0.100065	0	0	0	4.57115	0	0	0	0.00750893	0	0	0	0	0	0	0	0	0	0.0465706	0	0	0	0.00367098	0
340	7.64127	0	2.25064	0.918773	10.4681	12.2393	14.4286	16.5816	16.4657	14.863	12.8372	12.9835	13.1668	15.1898	16.3796	9.70783	7.30749	5.6605	3.83028	1.8026	0.444367	0	0.113539	0	0.0258973	0	0	0	0	5.01758	0	0	0	0	0.14576	0	0	0	0	0.016782	0	0	0	0.0467801	0	0	0	0.000748316	0
340.93	2.9139	0	7.97301	0	9.92883	9.90484	14.3646	16.6184	15.2235	13.8676	12.1499	12.5008	12.8128	14.1481	15.4654	9.23263	7.34101	5.60687	3.95965	1.9722	0.459748	0	0.128358	0	0	0	0	0	0	0	0	0	0.0559894	0	0.144144	0	0	0	0	0	0	0	0	0.0596339	0.000833619	0	0	0.00948496	0
342.03	0	0	0	0.440624	3.98576	9.61872	13.9321	15.1671	14.4148	12.766	11.0897	11.2815	12.4514	13.2377	14.4491	8.99375	7.30576	5.55798	3.84926	1.91811	0.801682	0	0	0	0	0	0	0	0	0	0.194604	0	0.0122767	0	0	0	0	0	0.0464554	0	0	0	0	0.0398279	0.0399194	0	0	0.00970432	0
342.96	0	0	0	0	2.56479	10.6242	13.1524	13.5567	13.7271	11.8511	10.0199	10.1841	11.7534	12.7249	13.7765	8.8188	6.92053	5.58392	3.81072	1.86122	1.09375	0	0	0.035925	0	0	0	0	0	0	2.62527	0	0	0	0	0	0	0	0.0225713	0	0	0	0	0.00399935	0.030605	0	0	0.00977304	0
344.06	0	0	0	3.99042	2.93919	10.0158	12.1185	12.8477	13.9033	11.2101	9.89992	10.0186	11.0084	12.0972	13.5363	8.70595	6.96378	5.30569	3.74904	1.8747	1.18976	0	0	0.113221	0.108835	0	0	0	0	0	5.37282	0	0	0	0	0.0663538	0	0	0	0	0	0	0	0.016078	0.00257728	0	0	0.00119102	0
345	0	4.04004	10.7494	1.75358	2.87608	9.05776	12.0937	12.1521	12.9966	10.6504	9.84184	9.62912	10.0806	11.5231	13.0148	8.2126	6.85549	4.88278	3.92694	1.91148	0.956175	0.0115933	0	0.0219428	0.129948	0.0510949	0	0	0	0	4.58957	0	0	0	0	0.109331	0	0.00229084	0	0	0	0	0	0.0207645	0	0	0	0.0219048	0.000686451
345.93	0	0	2.75681	0.539311	0.759515	8.93043	11.5069	11.6888	11.7208	10.0533	8.98034	9.2956	9.81989	11.0314	12.181	7.82274	7.04452	4.88411	3.85703	1.92447	0.808921	0.0448363	0	0	0.065322	0.0105129	0	0	0	0	0	0	0	0	0	0	0	0	0	0	0	0	0	0	0	0	0	0.00875308	0.0432
347.03	6.73789	0	0.411832	0	1.97242	9.5264	10.9302	11.2479	10.715	9.27919	8.3049	8.5054	9.45277	10.3497	11.707	7.53773	6.69026	5.25748	3.53381	1.86509	0.831198	0	0	0	0	0	0	0	0	0	0	0	0	0	0	0	0	0	0.0290046	0	0	0	0	0	0	0	0	0	0.0549612
347.96	17.1651	0	0	0	1.37984	9.33231	10.7299	10.4529	10.2027	8.66609	8.02888	7.85911	8.68265	9.82109	11.5853	7.57308	6.46166	5.21887	3.17987	1.86135	0.823699	0.126651	0	0	0	0	0	0	0	0	0	2.61606	0	0	0	0	0	0	0.0883214	0.0214763	0	0	0	0	0	0	0	0	0.0124694
349.06	6.24721	5.59513	1.67883	0.632579	3.17955	8.33734	10.0654	9.3769	9.69865	8.48415	7.76768	6.84231	8.10875	9.70129	11.0714	7.3112	6.2159	5.00805	3.30027	1.7582	0.90026	0.0421324	0	0	0	0	0	0	0	0	0	6.55538	0	0	0	0	0	0.0535113	0	0.0275829	0	0	0	0	0	0	0	0	0
350	0	6.73961	0	1.56606	5.19267	7.5767	9.40702	8.34973	8.97555	8.16428	6.83922	6.70292	7.62304	9.16553	10.3085	7.13563	6.20788	4.9488	3.61197	1.79141	0.874216	0.186284	0	0	0	0	0	0	0	0	0	9.84615	0	0	0	0	0	0	0	0.0244619	0	0	0	0.0031839	0	0	0	0	0
351.07	0	3.51118	0	0	6.83385	7.44013	8.56851	7.89046	8.66532	7.4459	6.50574	6.43135	7.00251	8.49616	9.77198	7.02986	5.88573	4.79584	3.65479	1.86301	0.924892	0.363486	0	0	0	0	0.0728413	0	0	0	0	1.14753	0	0	0	0	0	0	0	0	0	0	0	0	0	0	0	0	0.00065232
352	4.81087	0	0	0	6.85448	6.65251	8.25683	8.17503	7.91718	6.91869	6.04097	5.88969	6.35632	7.86833	9.67077	6.848	5.75509	4.41794	3.5649	2.06058	0.905784	0.629291	0.0616146	0	0.0230478	0	0	0	0	0	0	0	0	0	0	0	0	0	0.00428813	0	0	0	0	0.017055	0	0	0.0162304	0	0.025042
353.07	5.31375	0	1.14583	0	5.06475	6.57932	7.99703	9.1617	7.14999	6.90096	5.73255	5.35228	6.18912	7.5782	9.27879	6.51454	5.76772	4.53426	3.40541	2.14797	0.845299	0.334884	0.179612	0	0.261315	0.0114439	0	0	0	0	0	0	2.30657	0	0.0414967	0	0	0	0.0168291	0	0	0	0	0.0235292	0	0	0	0	0.0358962
354	0	3.37412	5.21721	0	0.0345273	6.8627	8.21547	8.20962	6.92306	6.67948	5.3706	4.98175	5.86297	6.8723	8.86915	6.20795	5.81126	4.80022	3.35172	1.96559	0.831213	0.364042	0.161118	0	0.105006	0.0403319	0	0	0	0	0	0	7.93352	0	0	0.00982732	0	0	0	0	0	0	0	0.0596943	0.0160099	0	0	0	0
355.07	0	6.91376	0.792114	0	1.38648	5.79541	7.48895	6.62654	6.47821	6.0588	5.19251	4.7356	5.29616	6.39884	8.18702	6.05656	5.09971	4.75665	3.34505	1.82169	0.87063	0.323779	0.104099	0	0	0.204263	0	0	0	0	0	0	11.5809	0	0	0	0	0	0	0	0	0	0	0.0614588	0.0461695	0.0241362	0	0	0
356	5.48761	4.59351	5.6304	0	4.53341	5.70816	6.96214	6.10959	6.27538	5.32102	4.5585	4.62472	4.92315	5.91771	7.74287	5.81307	4.73023	4.41417	3.1727	1.63205	0.841464	0.59779	0.193116	0	0	0.168074	0	0	0	0	0	0	0	0	0	0	0	0	0	0	0	0	0.00199634	0	0.000836765	0	0	0	0
357.07	9.35912	0	2.4631	0	5.66828	6.21157	6.75777	6.39543	5.77697	4.94071	4.20841	4.28727	4.68046	5.78788	7.57608	5.69713	4.79017	4.37484	2.84948	1.69781	0.900424	0.593196	0.223336	0	0	0.0235462	0	0	0	0	0	0	0	0.158268	0	0	0	0	0	0	0	0	0	0	0	0	0	0	0
358	3.18546	1.9421	0	0	0	6.1892	6.89589	5.62622	5.98367	4.79915	4.26988	4.2111	4.46989	5.29124	7.34741	5.72031	4.99624	4.41178	2.91518	1.69236	0.96395	0.578406	0.192116	0.234758	0	0	0	0	5.08832e-05	0	0	0	0	3.39764	0	0	0	0.0394147	0	0	0	0	0	0	0	0	0	0	0
359.07	0	7.02158	0	0	0	4.42527	5.71608	5.75379	5.38554	4.42238	4.16512	4.03019	4.15127	4.80321	7.03536	5.72123	4.9665	4.31026	3.13355	1.77051	1.02172	0.416545	0.286698	0.260018	0	0	0.212892	0	0.026727	0	0	0	0	10.015	0	0	0	0.00614074	0	0	0	0	0	0	0	0	0	0	0
360	0	0	0	6.06919	0	4.99783	5.28596	5.5383	5.11789	3.91882	3.7861	3.86327	3.90386	4.48373	6.61505	5.62525	4.8135	4.10488	3.12988	1.74204	0.8096	0.305432	0.293487	0	0	0	0.18809	0	0	0	0	0	0	8.94662	0	0	0	0	0	0	0	0	0	0	0	0	0	0	0
361.07	0.0621173	0	2.47982	9.55867	0.875242	4.67202	5.16053	5.68588	4.57567	3.68529	3.46988	2.97739	3.7434	4.36134	6.38407	5.48228	4.5431	3.93694	2.99196	1.65332	0.840265	0.432116	0.419346	0.0262192	0	0	0	0	0	0	0	0	0	0	0	0	0	0	0	0	0	0	0	0	0	0	0	0	0
362	0	0	0	5.61301	1.42705	5.03742	5.3831	4.22056	4.69879	3.61676	3.17072	2.86519	3.53895	4.35202	5.7469	5.21689	4.41939	3.96077	2.9066	1.77312	1.02469	0.465863	0.34136	0.108071	0	0	0	0	0	0	0	0	0	0	0.170755	0	0	0	0	0	0	0	0	0.0192923	0	0	0	0	0
363.07	0	1.94178	0	0	1.57675	3.50997	4.25195	3.81862	3.67416	3.22455	2.90081	2.62217	3.15298	4.13494	5.30957	5.07787	4.44789	4.06681	2.95071	1.93133	1.21265	0.65765	0.439451	0.105722	0	0	0	0.00818386	0	0	0	0	0	0	3.22618	0	0	0	0	0	0	0	0	0	0	0	0	0	0
364	4.77829	1.29256	0	0	3.46896	1.93642	4.1785	3.41901	3.00555	2.8991	2.83109	2.4804	2.89566	4.0961	5.16305	4.77922	4.40537	4.16444	2.95137	2.01842	1.19913	0.582741	0.481811	0	0	0	0	0.320518	0	0	0	0	0	0	10.7764	0	0	0	0	0	0.001093	0	0	0	0	0	0	0.011264	0.0102326
365.07	2.75157	0	3.23401	0	2.94213	0.398952	4.73988	4.49211	2.89155	2.93805	2.55415	2.25801	3.0921	3.60073	5.16115	4.62529	4.35492	3.72642	2.92354	1.85239	0.894114	0.548867	0.508764	0.267642	0	0	0.0283799	0.341958	0	0	0	0	0	0	13.7771	0	0	0	0	0	0.0319455	0	0	0	0	0	0	0.0167675	0.0210503
366	0.599537	0	0	0	5.35885	3.79258	4.70942	4.19134	3.17223	3.08568	2.22948	2.13963	2.831	3.5798	4.98162	4.38488	4.42793	3.61958	2.80288	1.70451	0.671188	0.365364	0.374393	0.499782	0	0	0	0.0676443	0	0	0	0	0	0	0	0	0	0	0	0.00752635	0	0	0	0	0	0	0	0	0.00580595
367.07	0	0	0	0	2.56416	4.25832	4.10317	3.33839	2.97571	2.69298	2.27305	2.36881	2.42928	3.08108	4.58703	4.27052	4.19677	3.638	2.91252	1.50025	0.606997	0.429564	0.357824	0.388178	0	0	0	0	0	0	0	0	0	0	0	0.192598	0	0	0	0	0	0	0	0	0	0	0	0.00294072	0
368	0	0	0	0	0	3.45054	4.08821	3.13835	2.7703	2.27107	2.07105	2.18142	2.12305	2.90705	4.17336	4.3058	3.7441	3.71848	2.90663	1.50984	0.749905	0.416598	0.518692	0.364775	0.0264557	0	0	0	0.0514229	0	0	0	0	0	0	1.85596	0	0	0	0	0	0	0	0.00335242	0	0	0	0.0229481	0
369.07	0	0	0	1.52256	0	2.15695	4.27821	3.69726	2.43495	1.96389	1.8519	1.96144	1.97603	2.70444	4.07223	4.58092	3.52653	3.48543	2.67344	1.60749	0.837729	0.653507	0.577285	0.145534	0.381601	0	0	0.121521	0.000153616	0	0	0	0	0	0	6.59476	0	0	0	0	0	0	0	0.0585766	0	0	0	0	0.00375452
370	0	0	0	5.39067	0	1.85532	4.14419	3.12901	2.12519	1.62042	1.61061	1.39282	1.69128	2.86039	4.16874	4.43805	3.61014	3.21656	2.40853	1.63722	0.792143	0.830593	0.595694	0.210091	0.422911	0	0	0	0	0	0.0645508	0	0	0	0	6.22864	0	0	0	0	0	0	0	0.0752443	0	0	0	0	0.0535073
371.07	0	0	2.95734	0	0.749784	0.504772	3.37145	2.04643	2.26995	1.51695	1.69758	1.32604	1.5666	2.5161	4.07074	4.11398	3.72489	3.18539	2.37884	1.51741	0.806102	0.686438	0.437388	0.194837	0.563818	0.118036	0	0	0	0	0	0	0	0	0	0	0	0	0	0	0	0	0	0.0019941	0	0	0	0	0
372	3.86198	0	1.38536	0	0	1.66894	3.58895	1.34326	2.40903	1.55198	1.51731	1.40303	1.47686	2.10989	3.83952	3.85227	3.71016	3.16466	2.54501	1.398	0.820517	0.374038	0.222429	0.377238	0.309739	0.359481	0	0	0.010238	0	0	0	0	0	0	0	0.106132	0	0	0	0	0	0	0	0	0	0	0	0
373.07	0	0	0	0	0	3.21948	3.74373	1.68491	1.97494	1.58434	1.27581	1.3395	1.23358	1.84576	3.60951	3.57586	3.57228	3.11817	2.57385	1.37258	0.863821	0.28487	0.129454	0.207064	0.152897	0.484163	0	0	0.00782672	0	0	0	0	0	0	0	2.19978	0	0	0	0	0	0	0	0	0.00589338	0.0135737	0	0
374	0	0	0	3.6143	0	2.78	3.30953	1.2669	2.04585	1.16897	1.29592	1.4687	1.21235	1.73911	3.43281	3.43689	3.38237	2.95491	2.52619	1.31028	0.73603	0.509168	0.426334	0.304292	0.268406	0.415892	0	0	0.00285387	0.164706	0	0	0	0	0	0	6.33726	0	0	0	0	0	0	0	0	0.00202938	0.0147878	0	0.0190458
375.07	0	2.40244	0	1.00144	0	1.47125	2.52049	1.74967	1.50134	1.23652	1.08545	0.820818	1.16904	1.66717	3.22427	3.56319	3.26446	3.06751	2.34156	1.49315	0.764967	0.574158	0.737425	0.312356	0.696216	0.398537	0	0	0.505336	0.0217543	0	0	0	0	0	0	4.11369	0	0	0	0	0	0	0.0438068	0	0	0.00388083	0	0
376	0	5.55374	0	1.09592	0	1.48422	2.18343	1.43944	1.3753	1.21104	0.976469	0.714797	1.00621	1.59923	3.42335	3.46334	3.14471	3.01221	2.304	1.44114	0.833092	0.808848	0.71205	0.141904	0.797784	0.524694	0	0	0.417615	0	0	0	0	0	0	0	0	0	0	0	0	0	0	0.00672594	0	0	0	0	0
377.07	0	5.47037	0.473376	0	0.290813	0.421265	2.6048	1.57856	0.943226	1.03049	0.741085	0.738765	0.786187	1.36012	3.36204	3.18884	3.21221	3.01908	2.24347	1.4879	0.760125	0.735107	0.574649	0.167448	0.848537	0.421282	0	0	0	0.103155	0	0	0	0	0	0	0	0.61618	0	0	0	0	0	0	0	0	0	0	0
378	0	2.27088	8.45567	3.52397	0	0.310631	2.88083	1.02262	0.853126	0.77144	0.810953	0.805737	0.971421	1.26255	2.94621	3.15762	3.22656	2.81191	2.37883	1.40931	0.835644	0.544463	0.465507	0.491366	0.848291	0.300728	0	0	0	0.264194	0	0	0	0	0	0	0	1.27668	0	0	0	0	0	0	0	0	0	0	0.0109501
379.07	3.72163	0.814516	7.20098	0	0	1.01706	3.16325	1.5014	0.747234	0.616469	0.466442	0.227485	0.92537	1.00827	2.59201	2.99042	3.17038	2.57048	2.29621	1.46206	0.993964	0.496427	0.501348	0.546263	0.791098	0.402473	0.160426	0	0	0.303874	0.0762747	0	0	0	0	0	0	4.55634	0	0	0	0	0	0.00821332	0	0	0	0	0
380	2.60178	0	7.34097	0	0	2.42297	2.22205	1.31132	0.661029	0.61216	0.4467	0.535913	0.719839	1.08832	2.40411	2.82337	3.0706	2.30398	2.13297	1.41802	1.06312	0.768366	0.497122	0.366551	0.501887	0.433129	0.207536	0	0	0.245183	0	0	0	0	0	0	0	5.79324	0	0	0	0	0	0.00181102	0	0	0	0	0
381.07	1.43678	0	0.896877	2.26383	0	2.17332	2.15327	0.471315	0.694615	0.422092	0.606636	0.646156	0.455383	0.940902	2.48244	2.81665	2.68962	2.38532	2.01774	1.50115	0.83218	0.981729	0.733004	0.262975	0.414044	0.403507	0.41435	0	0	0.169953	0	0	0	0	0	0	0	0	0	0	0	0	0	0	0	0	0	0	0
382	0	6.1843	5.91605	3.7296	0	1.59355	2.12214	0	0	0.416133	0.696316	0.493485	0.418856	1.11997	2.42026	2.88258	2.57205	2.30226	2.06388	1.48769	0.82868	0.735882	0.86893	0.366688	0.171063	0.370708	0.603484	0	0	0.0854698	0.00297835	0	0	0	0	0	0	0	0.895511	0	0	0	0	0	0	0	0	0	0
383.07	0	1.38931	7.80236	0	0	1.2358	1.71238	0.685307	0.300886	0.205172	0.544892	0	0.299785	0.715585	2.35345	2.73829	2.40164	2.27394	1.96262	1.45118	0.86881	0.701547	0.733469	0.303937	0.286039	0.657791	0.349751	0	0	0	0.0701962	0	0	0	0	0	0	0	2.6558	0	0	0	0	0	0	0	0	0.0116579	0
384	0.610392	0	4.40813	0	0	1.03708	1.23687	1.80432	0.349957	0.0299717	0.249521	0	0.249186	0.642249	2.16928	2.70885	2.65476	2.46718	2.04595	1.30763	1.01715	0.686531	0.371888	0.351892	0.449799	0.522968	0	0	0	0	0.0646146	0	0	0	0	0	0	0	3.45525	0	0	0	0	0	0	0	0	0	0
385.07	4.90252	0	0	0	0	1.04725	1.89129	1.35978	1.14206	0.0124626	0.332367	0	0.334444	0.448376	2.13054	2.52398	2.7483	2.49309	1.80915	1.14659	1.07636	0.709547	0.413796	0.420698	0.615728	0.464925	0.0632249	0.285648	0	0.0645566	0	0.0109979	0.0282434	0	0	0	0	0	4.03472	0	0	0	0	0	0	0	0	0	0
386	0	0	0	2.56297	0	0.791584	1.7715	0.82324	1.14633	0.315469	0.339673	0	0.44696	0.555308	2.09618	2.27769	2.76163	2.25104	1.68098	1.10198	0.976346	0.762272	0.819578	0.437781	0.404656	0.351918	0.277642	0.210369	0	0.0664474	0	0.0750113	0.00770883	0	0	0	0	0	0	0	0	0	0	0	0	0	0.039382	0	0
387.07	0	4.27161	0	0	0	0.466572	1.52423	0.786991	1.13558	0.278489	0.280189	0.00153903	0.356787	0.427738	1.98648	2.35559	2.39807	2.17609	1.65478	1.10744	0.86143	0.86354	1.00778	0.416943	0.243866	0.473122	0.430897	0.310123	0	0	0	0.011571	0	0	0	0	0	0	0	1.09929	0	0	0	0	0	0	0.00924228	0	0
388	0	5.22597	0.618211	0	0	1.94712	1.51437	0.964958	0.842317	0	0	0.188731	0.0354284	0.45942	1.8382	2.46566	2.0696	2.0127	1.6887	1.04487	0.837963	0.786145	0.772631	0.392872	0.345587	0.424348	0.286137	0.205319	0	0	0.0913709	0	0	0	0	0	0	0	0	2.47869	0	0	0	0	0	0	0	0.00865543	0
389.07	0	0	4.6879	0	0	1.50946	1.63365	0	0.220663	0	0.159692	0	0	0.439182	1.83297	2.51423	2.1199	1.98398	1.53409	1.02653	0.72149	0.635726	0.505604	0.550422	0.574143	0.387338	0.471164	0.251507	0	0	0.0823953	0	0	0	0	0	0	0	0	2.6862	0	0	0	0	0	0	0	0	0
390	0	0	3.94193	0	0	0.716546	1.31009	0	0	0	0.331347	0	0	0.279053	1.68825	2.46367	2.30209	1.95183	1.52554	1.08211	0.580695	0.690207	0.562458	0.428533	0.732765	0.379818	0.426983	0.173372	0	0	0.236899	0.130657	0	0	0	0	0	0	0	0	0	0	0	0	0	0	0	0	0
391.07	0	0	3.8402	0	0	0.408277	1.09404	0.26886	0.0396995	0	0.424784	0	0	0.203584	1.72784	2.34699	2.43626	2.01115	1.73707	1.24655	0.729634	0.693958	0.600116	0.418066	0.576318	0.231718	0.509658	0.296604	0.0433439	0	0	0	0	0.0207771	0	0	0	0	0	0	0	0	0	0	0	0.00332589	0	0	0
392	3.888	0	4.70042	1.91622	0	1.14263	1.24565	0.585585	0.080074	0	0.0549345	0	0	0.286252	1.76898	2.03264	2.16221	1.87959	1.81711	1.14933	0.993861	0.485157	0.782999	0.448957	0.668782	0.179686	0.347152	0.154542	0.110838	0	0	0	0	0	0	0	0	0	0	0	0.291615	0	0	0	0	0	0	0	0
393.07	7.44966	0	7.34079	0.0414225	0	1.18906	1.20195	0.587009	0	0	0	0.0136912	0	0.245133	1.66343	2.04218	1.80894	2.04321	1.6799	1.11316	0.950101	0.473137	0.822897	0.654246	0.700033	0.100671	0.485747	0.388047	0.227921	0	0	0	0	0	0	0	0	0	0	0	1.72269	0	0	0	0	0	0	0	0
394	3.24874	0	3.47377	5.02224	0	0	0.708258	0.97072	0	0	0	0	0	0.0852883	1.33051	2.10501	1.86392	2.06071	1.58258	1.02002	0.946921	0.599085	0.889083	0.894511	0.648011	0.302178	0.403113	0.283323	0.369756	0	0	0	0	0	0	0	0	0	0	0	0.041879	0	0	0	0	0	0	0	0
395.07	0	0.110897	1.55453	2.5615	3.62859	0	0.61634	0.639007	0	0	0	0	0	0.0290721	1.27376	2.11965	2.2976	1.9884	1.48606	1.17642	0.977815	0.659795	0.583226	0.722283	0.444971	0.584721	0.169246	0.0503296	0.41581	0	0	0	0	0.040665	0	0	0	0	0	0	0	0	0	0	0	0	0	0	0
396	0	5.82363	0	1.37964	0	0	0.75265	0.247661	0	0	0	0	0	0.101814	1.35329	2.01038	2.51787	1.82464	1.64707	1.05286	0.95086	0.539461	0.570064	0.597014	0.523527	0.622391	0.129519	0.112099	0.282459	0	0	0.142612	0	0	0	0	0	0	0	0	0	0	0	0	0	0	0	0	0
397.07	3.58931	0	2.01767	0	0	0	0.983272	0.299349	0	0	0	0	0	0	1.36471	1.95435	2.12808	1.84086	1.56671	1.10612	0.824567	0.641089	0.617111	0.558713	0.505054	0.646495	0.358297	0.416116	0.231399	0.0398364	0.0521455	0.304358	0	0	0.0997405	0	0	0	0	0	0	0	0	0	0	0	0	0	0
398	2.23652	0	0.203121	0	0	0.471101	0.836614	0.629669	0	0	0	0	0	0	1.32385	1.90279	1.75292	1.72447	1.40084	1.0717	0.833452	0.701463	0.752285	0.612677	0.505562	0.524932	0.443716	0.412877	0.462064	0.155956	0	0.104617	0.0292254	0	0	0	0	0	0	0	0	1.84152	0	0	0	0	0	0	0
399.07	0	0	6.3324	0	0	0.0863383	0.952562	0.507822	0	0	0	0	0	0	1.27183	1.962	1.79242	1.56194	1.32424	1.06243	0.828435	0.81153	0.677911	0.405626	0.227875	0.64638	0.40274	0.500279	0.392718	0.125541	0	0	0.0114168	0.0478106	0	0	0	0	0	0	0	1.71462	0	0	0	0	0.0283755	0	0
400	3.82902	4.12152	0	0	0	0	1.2419	0.778573	0	0	0	0	0	0.0292991	1.15492	2.03097	1.82875	1.31733	1.44885	0.908641	0.81173	0.80123	0.603298	0.37358	0.261954	0.572531	0.327512	0.448593	0.268547	0.184981	0	0	0	0	0	0	0	0	0	0	0	0	0	0	0	0	0	0	0
401.07	2.41068	0	0	0	0	0	1.18084	0.525937	0	0	0	0	0.0877454	0	1.15662	1.68864	1.76453	1.26881	1.33743	0.980287	0.948676	0.799544	0.59034	0.522664	0.345392	0.841089	0.630111	0.339178	0.229282	0.526362	0	0	0	0.0989844	0.0438157	0.144501	0	0	0	0	0	0	0	0	0	0	0	0	0
402	0	0	0	0	0	1.04329	0.985185	0.16932	0	0	0	0	0.0299032	0	1.273	1.32975	1.47526	1.49778	1.10457	0.72462	1.06062	0.779777	0.718703	0.668963	0.537821	0.674078	0.650677	0.249879	0.126934	0.307667	0	0	0.0791612	0.0981536	0.0724319	0.0127699	0	0	0	0	0	0	0.30478	0	0	0	0	0	0
403.07	0	0	0	0	0.191977	1.96113	0.748681	0.712858	0	0	0	0	0	0	1.25674	1.24169	1.45384	1.57736	1.10054	0.582999	0.972749	0.714485	0.75011	0.62286	0.287873	0.560647	0.849748	0.533659	0	0.141791	0.0972875	0	0.121709	0.108296	0.0306032	0.073441	0	0	0	0	0	0	2.92406	0	0	0	0	0	0
404	0	3.51576	0	0	0	0.944901	0.23556	0.829072	0	0	0	0	0	0	1.01102	1.21248	1.30497	1.50863	1.28303	0.550535	0.847801	0.646737	0.653736	0.807876	0.409464	0.39596	0.490953	0.526503	0	0.141028	0.0226213	0	0	0	0	0.0978838	0	0	0	0	0	0	1.97553	0	0	0	0	0	0
405.07	0	0	0	0.47957	0	1.123	0	0.164568	0	0	0	0	0	0	0.751615	1.05595	1.46089	1.48296	1.19625	0.820377	0.762563	0.470781	0.562027	0.889466	0.471264	0.524009	0.349366	0.485605	0.256825	0.375234	0	0	0	0	0	0.070863	0	0	0	0	0	0	0	0	0	0	0	0	0
406	0	0	0	0	0	0	0.164096	0	0	0	0	0	0	0	0.720918	1.17812	1.58997	1.52868	1.13204	0.947408	0.769471	0.604852	0.763404	0.983049	0.786578	0.431704	0.154292	0.290666	0.325079	0.45362	0	0	0	0	0	0	0	0	0	0	0	0	0	0	0	0	0	0	0
407.07	0	0	0	0	2.07404	0	0.576858	0	0	0	0	0	0	0	0.657895	1.53943	1.40363	1.37579	1.05554	0.926648	0.761552	0.733733	0.791435	0.744113	0.663735	0.409487	0.285237	0.198783	0.205586	0.448399	0	0	0	0.0523808	0	0	0	0	0	0	0	0	0	1.0265	0	0	0	0	0
408	0	5.13779	0	0.253485	1.37338	0	0.164041	0	0	0	0	0	0	0	0.592119	1.56971	1.23402	1.13171	1.15201	0.783918	0.71437	0.790305	0.718011	0.745637	0.598567	0.559876	0.512177	0.33126	0.130591	0.376445	0.0623698	0	0	0.0220171	0	0.0342717	0	0	0	0	0	0	0	3.91765	0	0	0	0	0
409.07	6.26023	0	12.3102	2.88408	2.79509	0	0	0	0	0	0	0	0	0	0.537042	1.48043	1.32023	1.2245	1.25459	0.730628	0.661016	0.750046	0.718441	0.668853	0.475174	0.514207	0.671318	0.485063	0.0698818	0.271558	0.00762385	0	0	0	0.0672566	0.0689155	0	0	0	0	0	0	0	7.06126	0	0	0	0	0
410	0	0	7.81448	1.63779	3.47029	0	0.0129959	0.900751	0	0	0	0	0	0	0.690354	1.46718	1.44421	1.39938	1.28779	0.883346	0.745821	0.500106	0.844371	0.613831	0.725867	0.540309	0.669599	0.236686	0.180544	0.103757	0.0534706	0	0	0.0650682	0	0.00691003	0	0	0	0	0	0	0	0	0	0	0	0	0
411.07	0	0	6.72131	0	0	0	0.470338	0	0	0	0	0	0	0	0.940046	1.40715	1.30997	1.44137	1.2978	0.866928	0.815834	0.384994	0.72973	0.669422	0.791823	0.6929	0.53046	0.152343	0.212055	0.0701298	0.0662066	0.0999905	0	0.0969248	0	0	0	0	0	0	0	0	0	0	0	0	0	0	0
412	0	0	0	0	0	0	0.324935	0	0	0	0	0	0	0	0.824648	1.32335	1.22027	1.30237	1.27887	0.886984	0.875153	0.454671	0.544014	0.819118	0.587713	0.787959	0.35682	0.385322	0.104804	0	0.264898	0.159454	0	0	0	0.016837	0	0	0	0	0	0	0	0	1.34772	0	0	0	0
413.07	1.62145	0	1.08107	0	0	0	0.486001	0	0	0	0	0	0	0	0.604297	1.13939	1.06841	1.04849	1.11469	0.656447	0.891639	0.704681	0.684304	0.829027	0.547683	0.775525	0.219646	0.492927	0.194654	0.393703	0.0815117	0.193116	0	0	0	0.0563969	0	0	0	0	0	0	0	0	4.80376	0	0	0	0
414	2.64348	0	0	0	0	0	0.156879	0.49066	0	0	0	0	0	0	0.396511	1.1146	0.977313	0.964765	0.82627	0.506996	0.798269	0.64741	0.662654	0.571654	0.564263	0.728142	0.239334	0.256667	0.402769	0.608118	0.0664128	0.0386135	0	0	0	0.0790929	0	0	0	0	0	0	0	0	11.7727	0	0	0	0
415.07	0	0	0	0	0	0	0	0	0	0	0	0	0	0	0.554674	1.05012	1.21108	0.955615	0.766292	0.604783	0.667994	0.420536	0.646664	0.542051	0.660696	0.686059	0.412825	0.319223	0.317784	0.705824	0.030988	0.0401997	0	0	0	0	0	0	0	0	0	0	0	0	7.96095	0	0	0	0
416	0	0	0	0	0	0	0	0	0	0	0	0	0	0	0.653189	1.00389	1.36861	1.07969	0.860287	0.861803	0.693401	0.552709	0.570038	0.419649	0.442627	0.592677	0.379683	0.487888	0.231741	0.343153	0.288499	0.199863	0	0	0	0	0	0	0	0	0	0	0	0	0	0.0499111	0	0	0
417.07	0	1.50623	0	0	0	0.153412	0.388288	0	0	0	0	0	0	0	0.604527	0.905871	1.24214	1.03888	0.80342	0.940547	0.636209	0.688904	0.68004	0.454668	0.39056	0.676396	0.283298	0.427426	0.391097	0.234844	0.545969	0.184695	0.0165003	0	0	0	0	0	0	0	0	0	0	0	0	1.88796	0	0	0
418	0	0	0	2.20464	0	0.918197	0.342911	0	0	0	0	0	0	0	0.366485	1.03277	1.18074	1.14538	0.703795	0.75695	0.527039	0.639292	0.561745	0.718252	0.493473	0.55936	0.403858	0.207625	0.4918	0.245231	0.499259	0.207923	0.0940817	0	0	0.0356433	0.0576278	0	0	0	0	0	0	0	0	7.21384	0	0	0
419.07	1.72279	0	0	8.7145	0	0.79932	0	0	0	0	0	0	0	0	0.276898	0.912329	1.07294	1.08916	0.660844	0.752163	0.495829	0.606558	0.474276	0.838084	0.732915	0.407293	0.309888	0.480457	0.204286	0.330366	0.354227	0.212031	0.25682	0	0	0	0.0641787	0	0	0	0	0	0	0	0	16.0693	0	0	0
420	0	0	0	0	0	0	0	0	0	0	0	0	0	0	0.358957	0.761513	0.850805	1.18841	0.711812	0.696964	0.666165	0.763452	0.424916	0.686162	0.782983	0.554147	0.145326	0.398581	0.171139	0.27708	0.285533	0.200271	0.226528	0	0	0	0.267991	0	0	0	0	0	0	0	0	14.029	0	0	0
421.06	3.76405	0	0	0	1.25262	0	0	0	0	0	0	0	0	0	0.242385	0.591726	0.98347	1.15752	0.713544	0.609201	0.764784	0.616329	0.410894	0.427522	0.544215	0.497399	0	0.170982	0.0917102	0.219624	0.267263	0.261211	0.130809	0	0	0.0312195	0.070371	0	0	0	0	0	0	0	0	0	0	0	0.0187327
421.96	6.40019	0	0	0	0	0	0	0	0	0	0	0	0	0	0	0.785177	1.23768	1.04507	0.728047	0.54654	0.690967	0.389288	0.471128	0.435209	0.295027	0.463992	0.557959	0.0760628	0.320485	0.25268	0.170378	0.318081	0	0	0	0	0.0911781	0	0	0	0	0	0	0	0	0	1.02627	0	0.0678641
423.03	7.04106	0	0	3.29195	0	0	0.184728	0	0	0	0	0	0	0	0	0.767806	1.09936	0.698391	0.733254	0.601725	0.46148	0.413194	0.513288	0.325663	0.110341	0.375325	0.552057	0.324551	0.191531	0.279716	0.150245	0.332323	0.0821357	0	0	0	0.0893059	0	0	0	0	0	0	0	0	0	6.12573	0	0.0598771
423.93	4.2702	0	0	0	0	0	0	0	0	0	0	0	0	0	0.030547	0.73472	0.811371	0.652752	0.701693	0.587627	0.367352	0.615276	0.545868	0.403527	0.130066	0.590402	0.39449	0.403301	0.201462	0.0853909	0.237258	0.225772	0.0326834	0	0	0.0159306	0.0743517	0	0	0	0	0	0	0	0	0	11.5036	0	0
425	2.0236	0	0	0	0	0	0	0	0	0	0	0	0	0	0	0.500506	0.723096	0.805577	0.71545	0.571339	0.363523	0.494455	0.410543	0.490243	0.134643	0.413436	0.0953724	0.169256	0	0.0581146	0.0691259	0.20025	0.139113	0.0764476	0	0	0	0	0	0	0	0	0	0	0	0	8.91492	0	0
426.06	0	0	0	0	0	0	0.180513	0	0	0	0	0	0	0	0	0.564223	0.745173	1.02957	0.663886	0.372562	0.343685	0.423875	0.151715	0.615887	0.242606	0.381372	0.622805	0.205396	0.119919	0.123016	0.116363	0.129631	0.140413	0.0576076	0	0	0	0	0	0	0	0	0	0	0	0	0	0	0
426.96	0	0	0	0	0.807791	0	0.491626	0	0	0	0	0	0	0	0.0983092	0.717049	0.525802	0.89813	0.684492	0.402746	0.484797	0.285655	0.0434421	0.432337	0.131541	0.331699	0.345321	0.160054	0.493728	0.288814	0.144289	0.185712	0.137039	0.0133097	0	0	0	0	0	0	0	0	0	0	0	0	0	0.243381	0
428.03	0	0	0	0	0	0	0.547323	0	0	0	0	0	0	0	0	0.911564	0.226204	0.729974	0.720621	0.579702	0.599943	0.254527	0.07814	0.248976	0.0509842	0.381354	0.206725	0.445472	0.446335	0.273115	0.21107	0.262192	0.0927695	0.076834	0	0	0	0.0641034	0	0	0	0	0	0	0	0	0	3.74293	0
428.93	0	0	0	0	0	0	0.245512	0	0	0	0	0	0	0	0	0.730101	0.215175	0.624131	0.759323	0.652624	0.48009	0.285897	0.295674	0.262742	0.366895	0.287769	0.345478	0.224561	0.182347	0	0.145326	0.163015	0.119659	0.112345	0	0	0	0.0539932	0	0	0	0	0	0	0	0	0	11.4462	0
430	0	0	0	0	0	0	0	0	0	0	0	0	0	0	0	0.489672	0.496167	0.550356	0.592144	0.416766	0.232396	0.588506	0.377288	0.53678	0.665027	0.360465	0.566183	0.0147957	0.277514	0	0.247315	0.169151	0.0963712	0	0.0246234	0	0	0	0	0	0	0	0	0	0	0	0	10.7033	0
431.07	9.25605	0	1.3149	0	0	0	0	0	0	0	0	0	0	0	0	0.487809	0.682704	0.549424	0.224174	0.135015	0.142757	0.52853	0.292595	0.4957	0.641004	0.481703	0.250508	0.0591613	0.535994	0	0.321148	0.238566	0	0	0.0267419	0	0	0	0	0	0	0	0	0	0	0	0	0	0
432	11.1106	0	0	0	0	0	0	0	0	0	0	0	0	0	0	0.559	0.671433	0.705304	0.205649	0.274142	0.10401	0.361642	0.212513	0.468146	0.375341	0.617243	0.0425592	0.214874	0.256955	0.186488	0.275539	0.234828	0.0363154	0	0	0	0	0	0	0	0	0	0	0	0	0	0	0	0.670738
433.07	0	0	0	0	1.56514	0	0	0	0	0	0	0	0	0	0	0.430707	0.483691	0.727619	0.279373	0.232607	0.233985	0.380038	0.340598	0.441859	0.509118	0.518645	0.321023	0.25953	0.191851	0.135607	0.259933	0.147887	0	0.0415357	0	0	0	0	0	0	0	0	0	0	0	0	0	0	3.86134
434	0	0	0	0	0	0.138785	0	0	0	0	0	0	0	0	0	0.244828	0.351967	0.713023	0.434516	0.253295	0.166582	0.302093	0.408443	0.406813	0.345695	0.438886	0.517293	0.189948	0.174982	0.239717	0.20576	0.11423	0.0514981	0.0236085	0	0	0	0	0	0	0	0	0	0	0	0	0	0	12.2357
435.07	3.964	0	0	0	0	0	0	0	0	0	0	0	0	0	0	0.345241	0.331151	0.627101	0.532781	0.175365	0.0168339	0.273127	0.153495	0.392738	0.240585	0.34869	0.239802	0.423031	0.069146	0.197254	0.292523	0.134752	0.0884912	0	0	0	0	0	0	0	0	0	0	0	0	0	0	0	11.8827
436	9.38899	5.65133	0	0	0	0	0	0	0	0	0	0	0	0	0	0.330149	0.413756	0.683444	0.55016	0.308958	0.0196809	0.314871	0.0665319	0.254372	0	0.410501	0.0477515	0.216752	0.00221467	0.25509	0.40921	0	0.145213	0.0634641	0	0	0	0	0	0	0	0	0	0	0	0	0	0	0
437.07	15.0159	8.28563	0	0	0	0	0	0	0	0	0	0	0	0	0	0.107634	0.316334	0.417282	0.405673	0.339884	0.259277	0.394348	0.142466	0.208909	0.228279	0.345952	0	0	0.259899	0.297923	0.294204	0	0.0833746	0.0260824	0	0	0	0	0	0	0	0	0	0	0	0	0	0	0
438	9.01747	5.3424	0	0	0	0	0	0	0	0	0	0	0	0	0	0	0.39044	0.378727	0.21596	0.168652	0.225789	0.0941901	0.275617	0.255238	0.24717	0.202451	0	0.0613698	0.233271	0.303071	0.272797	0	0.117795	0.0420229	0	0	0	0	0	0	0	0	0	0	0	0	0	0	0
439.07	3.5353	2.23836	0	0	0	0	0	0	0	0	0	0	0	0	0	0	0.591712	0.0339271	0.193192	0.11375	0.149284	0.177748	0.231708	0.21232	0.489306	0.0956725	0	0.254149	0.269425	0.282376	0.382411	0.189868	0.0231294	0	0	0	0	0	0	0	0	0	0	0	0	0	0	0	0
440	0	3.57331	0	0	0	0	0	0	0	0	0	0	0	0	0.00551983	0.227569	0.724027	0	0.154414	0.0519687	0.199982	0.192833	0.188888	0.0936881	0.143477	0.0302732	0.112035	0.187385	0.301207	0.452677	0.667019	0.296402	0	0	0	0	0	0	0	0	0	0	0	0	0	0	0	0	0
441.06	0	7.46236	10.0663	0	0	0	0	0	0	0	0	0	0	0	0	0.210653	0.429024	0	0.178049	0.142713	0.270564	0.155787	0.296846	0	0.0894334	0.246549	0.353893	0	0.610821	0.430269	0.386745	0.194413	0.0150775	0	0	0	0	0	0	0.0600461	0	0	0	0	0	0	0	0	0
441.96	0	9.27625	4.72804	0	0	0	0	0	0	0	0	0	0	0	0	0.142975	0.293325	0.103217	0	0.313194	0.115851	0.0956642	0.429541	0.0838701	0	0.453288	0.35701	0	0.397005	0.211862	0.157044	0	0.10432	0	0	0	0	0	0	0	0	0	0	0	0	0	0	0	0
443.03	0	5.94529	0	0	0	0	0	0	0	0	0	0	0	0	0	0.0531884	0.227054	0.250663	0.0362234	0.354492	0	0.19952	0.473151	0.0152308	0.215142	0.512487	0.166728	0	0.327325	0	0.0960741	0	0.0377299	0	0	0	0	0	0	0	0	0	0	0	0	0	0	0	0
443.93	0	0.194599	0	0.203997	0	0	0	0	0	0	0	0	0	0	0	0.0782139	0.147014	0.386382	0.109664	0.358765	0	0.168261	0.24994	0.0738819	0.38633	0.208833	0.109259	0.0746212	0	0.165007	0.292033	0.14976	0.133064	0	0	0	0	0	0	0	0	0	0	0	0	0	0	0	0
445	7.87886	0	0	1.63185	0	0	0	0	0	0	0	0	0	0	0	0.0120581	0	0.137201	0.287559	0.0985185	0.113197	0.0103865	0.0963823	0.0511299	0.422901	0.0432279	0.156784	0.168262	0	0.290591	0.142079	0.155465	0.237593	0	0	0	0	0	0	0	0	0	0	0	0	0	0	0	0
446.06	0	0	0	0	0	0	0	0	0	0	0	0	0	0	0	0.0389847	0	0	0.217806	0.103634	0.00697396	0	0.0679258	0.221625	0.117273	0.18529	0.185856	0.247753	0	0.233527	0.00669612	0.0233906	0.153378	0.0195926	0	0	0	0	0	0	0	0	0	0	0	0	0	0	0
446.96	0	0	0	4.89058	0	0	0	0	0	0	0	0	0	0	0	0.162406	0	0.0347903	0.181275	0	0.0106369	0	0.0706342	0.135744	0.0707008	0.283637	0.0340657	0.167433	0.0674861	0	0	0	0	0	0	0	0	0	0	0	0	0	0	0	0	0	0	0	0
448.03	0	0	0	7.76894	0	0	0	0	0	0	0	0	0	0	0	0.065728	0	0.165978	0	0	0.0280947	0.0429431	0.11772	0	0.171269	0.00958208	0	0	0	0.170343	0	0	0	0.00933937	0	0	0	0	0	0	0	0	0	0	0	0	0	0	0
448.93	8.08784	0	0	6.06683	0	0	0	0	0	0	0	0	0	0	0	0.00416124	0.139198	0	0	0	0.164119	0	0.182945	0.00103941	0	0	0	0	0	0.162813	0	0.0300957	0.0677223	0	0	0	0	0	0	0	0	0	0	0	0	0	0	0	0
450	0.849154	8.78917	2.02303	0	0	0	0	0	0	0	0	0	0	0	0	0	0.205295	0	0	0	0.011003	0	0	0	0	0	0	0.164548	0.0434338	0.171573	0.112346	0	0.0978863	0	0	0	0	0	0	0	0	0	0	0	0	0	0	0	0
451.06	1.10627	10.5237	5.94717	0	0	0	0	0	0	0	0	0	0	0	0	0	0.206039	0.245663	0	0	0	0	0	0	0.00957576	0.114849	0	0.0944709	0.21185	0	0.137348	0	0	0	0	0	0	0	0	0	0	0	0	0	0	0	0	0	0
451.96	0.0587874	3.26858	0	0	0	0	0	0	0	0	0	0	0	0	0	0	0.0966494	0.135109	0	0	0	0.0264455	0	0	0.160745	0	0.42429	0.0469757	0	0	0.0152805	0	0	0	0	0	0	0	0	0	0	0	0	0	0	0	0	0	0
453.03	0.345631	0	0	0	0	0	0	0	0	0	0	0	0	0	0	0	0	0	0	0	0	0.074585	0	0	0	0	0.471757	0.00673497	0	0	0	0.0855018	0	0	0	0	0	0	0	0	0	0	0	0	0	0	0	0	0
453.93	6.40637	0	0	0	0	0	0	0	0	0	0	0	0	0	0	0	0	0	0	0	0	0	0	0	0	0	0.285866	0	0	0.095722	0	0.235071	0	0	0	0	0	0	0	0	0	0	0	0	0	0	0	0	0
455	0	0	0	0	0	0	0	0	0	0	0	0	0	0	0	0	0	0	0.0497768	0	0	0	0	0	0	0	0	0	0	0.00170529	0.119295	0.0479309	0	0	0	0	0	0	0	0	0	0	0	0	0	0	0	0	0
456.06	0	0	0	0	0	0	0	0	0	0	0	0	0	0	0	0	0	0	0.0607709	0	0	0	0	0	0.0710864	0	0.0303157	0.0401735	0.0142263	0	0.0433276	0	0	0	0	0	0	0	0	0	0	0	0	0	0	0	0	0	0
456.96	0	1.08597	2.57982	0	0	0	0	0	0	0	0	0	0	0	0	0	0	0	0	0	0	0	0	0	0.0549797	0	0.0813204	0.0622317	0.0625476	0	0	0	0	0	0	0	0	0	0	0	0	0	0	0	0	0	0	0	0
458.03	0	1.36493	4.91481	0	0	0	0	0	0	0	0	0	0	0	0	0	0	0.0113992	0	0	0	0	0.0721505	0	0	0	0	0.0785254	0.0460325	0	0	0.0999378	0.00794829	0	0	0	0	0	0	0	0	0	0	0	0	0	0	0	0
458.93	0	0	0	0	0	0	0	0	0	0	0	0	0	0	0	0	0	0	0	0	0	0	0	0	0	0	0	0.0434602	0	0	0	0	0	0	0	0	0	0	0	0	0	0	0	0	0	0	0	0	0
460	0	0	2.87687	0	0	0	0	0	0	0	0	0	0	0	0	0	0	0	0	0	0	0	0	0	0	0.134489	0	0.170571	0	0	0	0	0	0	0	0	0	0	0	0	0	0	0	0	0	0	0	0	0
461.06	0	0	0	0	0	0	0	0	0	0	0	0	0	0	0	0	0	0	0	0	0	0	0	0	0.0294935	0	0	0.0289609	0	0	0	0	0	0	0	0	0	0	0	0	0	0	0	0	0	0	0	0	0
461.96	0	0	0	0	0	0	0	0	0	0	0	0	0	0	0	0	0	0	0	0	0	0	0.0168508	0.218094	0.245029	0	0	0	0.00476384	0	0	0.115636	0	0	0	0	0	0	0	0	0	0	0	0	0	0	0	0	0
463.03	0	0	0	0.247176	0	0	0	0	0	0	0	0	0	0	0	0	0	0	0	0	0	0	0	0	0.241052	0	0	0	0.0977464	0.0382834	0	0.0017342	0.0414117	0	0	0	0	0	0	0	0	0	0	0	0	0	0	0	0
463.93	1.15592	0	0	0	0	0	0	0	0	0	0	0	0	0	0	0	0	0	0	0	0	0	0	0	0	0.0597422	0.00357662	0	0	0.0708966	0	0	0.0648144	0	0	0	0	0	0	0	0	0	0	0	0	0	0	0	0
465	3.54165	0	0	0	0	0	0	0	0	0	0	0	0	0	0	0	0	0	0	0	0	0	0	0	0	0	0	0	0	0	0.00951582	0	0	0	0	0	0	0	0	0	0	0	0	0	0	0	0	0	0
466.06	5.01383	0	0	0	0	0	0	0	0	0	0	0	0	0	0	0	0	0	0	0	0	0	0	0	0	0	0	0	0	0	0.143942	0	0	0	0	0	0	0	0	0	0	0	0	0	0	0	0	0	0
466.96	5.61386	0	2.71286	0.31152	0	0	0	0	0	0	0	0	0	0	0	0	0	0	0	0	0	0	0	0	0	0	0	0	0	0	0.243314	0	0	0	0	0	0	0	0	0	0	0	0	0	0	0	0	0	0
468.03	5.69036	3.87643	0	1.64085	0	0	0	0	0	0	0	0	0	0	0	0	0	0	0	0	0	0	0	0	0	0	0.00313522	0	0.0223917	0.0921298	0.0734852	0	0	0	0	0	0	0	0	0	0	0	0	0	0	0	0	0	0
468.93	0	6.00943	0	0	0	0	0	0	0	0	0	0	0	0	0	0	0	0	0	0	0	0	0	0	0	0	0.0264919	0.0109754	0	0.106702	0	0	0	0	0	0	0	0	0	0	0	0	0	0	0	0	0	0	0
470	0	1.57544	0	0	1.76004	0	0	0	0	0	0	0	0	0	0	0	0	0	0	0	0	0	0	0	0	0	0	0	0	0	0	0	0	0	0	0	0	0	0	0	0	0	0	0	0	0.0067637	0	0	0
471.06	0	2.56155	0	0	0.730184	0	0	0	0	0	0	0	0	0	0	0	0	0	0	0	0	0	0	0	0.0396182	0	0.177684	0	0	0	0	0	0	0	0	0	0	0	0	0	0	0	0	0	0	0	0	0	0
471.96	0	0	0.0945432	0	0	0	0	0	0	0	0	0	0	0	0	0	0	0	0	0	0	0	0	0	0.213047	0	0.171729	0	0	0	0	0.0597213	0	0	0	0	0	0	0	0	0	0	0	0	0	0.0106909	0	0	0
473.03	0	0	0	0.413669	0	0	0	0	0	0	0	0	0	0	0	0	0	0	0	0	0	0	0	0	0	0	0.0674666	0	0	0	0	0	0	0	0	0	0	0	0	0	0	0	0	0	0	0.00156057	0	0	0
473.93	2.88129	0	0	1.68491	0	0	0	0	0	0	0	0	0	0	0	0	0	0	0	0	0	0	0	0	0	0	0	0	0	0.191033	0.1667	0	0	0	0	0	0	0	0	0	0	0	0	0	0	0	0	0	0
475	0	2.75066	0	0	0	0	0	0	0	0	0	0	0	0	0	0	0	0	0	0	0	0	0	0	0	0	0.0519707	0	0	0.299302	0	0.0356861	0	0	0	0	0	0	0	0	0	0	0	0	0	0	0	0	0
476.06	0	0.667759	2.54741	0	0	0	0	0	0	0	0	0	0	0	0	0	0	0	0	0	0	0	0	0.187852	0	0	0	0	0.186661	0	0	0.00286021	0	0	0	0.0278773	0	0	0	0	0	0	0	0	0	0	0	0	0
476.96	0	0	3.4188	0.0937651	0	0	0	0	0	0	0	0	0	0	0	0	0	0	0	0	0	0	0	0	0	0	0	0.0846614	0	0	0	0	0	0	0	0	0	0	0	0	0	0	0	0	0	0	0	0	0
478.03	2.74054	0	3.24997	0	0	0	0	0	0	0	0	0	0	0	0	0	0	0	0	0	0	0	0	0	0	0	0	0	0	0	0	0	0	0	0	0	0	0	0	0	0	0	0	0	0	0	0	0	0.0294888
478.93	0	4.8083	0	0	0	0	0	0	0	0	0	0	0	0	0	0	0	0	0	0	0	0	0	0	0	0	0	0	0	0	0	0	0	0	0	0	0	0	0	0	0	0	0	0	0	0	0	0	0.0193522
480	4.22909	5.33487	0	0	0	0	0	0	0	0	0	0	0	0	0	0	0	0	0	0	0	0	0	0	0	0	0	0	0.00742272	0	0.0568285	0	0	0	0	0	0	0	0	0	0	0	0	0	0	0	0	0	0.00898875
481.06	8.28517	8.27555	0	0	0.510355	0	0	0	0	0	0	0	0	0	0	0	0	0	0	0	0	0	0	0	0	0	0	0	0	0	0	0	0	0	0	0	0	0	0	0	0	0	0	0	0	0	0	0	0.013707
481.96	4.16813	4.48512	0	0	0	0	0	0	0	0	0	0	0	0	0	0	0	0	0	0	0	0	0	0	0	0	0	0	0	0	0	0	0	0	0	0	0	0	0	0	0	0	0	0	0	0	0	0	0
483.03	0	0.658026	0	0.68228	0	0	0	0	0	0	0	0	0	0	0	0	0	0	0	0	0	0	0	0	0	0	0	0	0	0	0	0	0	0	0	0	0	0	0	0	0	0	0	0	0	0	0	0	0
483.93	1.38449	0.926008	0	0.625913	0	0	0	0	0	0	0	0	0	0	0	0	0	0	0	0	0	0	0	0	0	0	0	0	0	0	0	0	0	0	0	0	0	0	0	0	0	0	0	0	0	0	0	0	0
485	0	1.13265	0	1.35414	0	0	0	0	0	0	0	0	0	0	0	0	0	0	0	0	0	0	0	0	0	0	0	0	0	0	0	0	0	0	0	0	0	0	0	0	0	0	0	0	0	0	0	0	0
486.06	0	0	0	0	0	0	0	0	0	0	0	0	0	0	0	0	0	0	0	0	0	0	0	0	0	0	0	0	0	0.1024	0	0	0	0	0	0	0	0	0	0	0	0	0	0	0	0	0	0	0
486.96	0	0	0	0	0	0	0	0	0	0	0	0	0	0	0	0	0	0	0	0	0	0	0	0	0	0	0	0	0	0.057747	0	0	0	0	0	0	0	0	0	0	0	0	0	0	0	0	0	0	0
488.03	0	0	0	0	0	0	0	0	0	0	0	0	0	0	0	0	0	0	0	0	0	0	0	0	0	0	0	0.0815901	0	0	0	0	0	0	0	0	0	0	0	0	0	0	0	0	0	0	0	0	0
488.93	0	6.31882	0	0	0	0	0	0	0	0	0	0	0	0	0	0	0	0	0	0	0	0	0	0	0	0	0	0	0	0	0	0	0	0	0	0	0	0	0	0	0	0	0	0	0	0	0	0	0
490	0	9.22981	0	0	0	0	0	0	0	0	0	0	0	0	0	0	0	0	0	0	0	0	0	0	0	0	0	0	0	0	0	0	0	0	0	0	0	0	0	0	0	0	0	0	0	0	0	0	0
491.06	4.7488	8.76846	0	0	0	0	0	0	0	0	0	0	0	0	0	0	0	0	0	0	0	0	0	0	0	0	0	0	0	0	0	0	0	0	0	0	0	0	0	0	0	0	0	0	0	0	0	0	0
491.96	13.2757	8.07259	0	0	0	0	0	0	0	0	0	0	0	0	0	0	0	0	0	0	0	0	0	0	0	0	0	0	0	0	0.0494128	0	0	0	0	0.0475818	0	0	0	0	0	0	0	0	0	0	0	0	0
493.03	4.50498	0	0	0	0	0	0	0	0	0	0	0	0	0	0	0	0	0	0	0	0	0	0	0	0	0	0	0	0	0	0	0	0	0	0	0	0	0	0	0	0	0	0	0	0	0	0	0	0
493.93	0	0	0	0	0	0	0	0	0	0	0	0	0	0	0	0	0	0	0	0	0	0	0	0	0	0	0	0	0	0	0	0	0	0	0	0	0	0	0	0	0	0	0	0	0	0	0	0	0
495	0	0	0	0	0	0	0	0	0	0	0	0	0	0	0	0	0	0	0	0	0	0	0	0	0	0	0	0	0	0	0	0	0	0	0	0	0	0	0	0	0	0	0	0	0	0	0	0	0
496.06	0	0	0	0	0	0	0	0	0	0	0	0	0	0	0	0	0	0	0	0	0	0	0	0	0	0	0	0	0	0	0	0	0	0	0	0	0	0	0	0	0	0	0	0	0	0	0	0	0
496.96	0.505064	0	0	0	0	0	0	0	0	0	0	0	0	0	0	0	0	0	0	0	0	0	0	0	0	0	0	0	0	0	0	0	0	0	0	0	0	0	0	0	0	0	0	0	0	0	0	0	0
498.03	0	0	0	0	0	0	0	0	0	0	0	0	0	0	0	0	0	0	0	0	0	0	0	0	0	0	0	0	0	0	0	0	0	0	0	0	0	0	0	0	0	0	0	0	0	0	0	0	0
498.93	0	4.30069	0	0	0	0	0	0	0	0	0	0	0	0	0	0	0	0	0	0	0	0	0	0	0	0	0	0	0	0	0	0	0	0	0	0	0	0	0	0	0	0	0	0	0	0	0	0	0
500	0	6.29332	0	0	0	0	0	0	0	0	0	0	0	0	0	0	0	0	0	0	0	0	0	0	0	0	0	0	0	0	0	0	0	0	0	0	0	0	0	0	0	0	0	0	0	0	0	0	0
501.04	0	0.294463	3.76882	0	0.186241	0	0	0	0	0	0	0	0	0	0	0	0	0	0	0	0	0	0	0	0	0	0	0	0	0	0	0	0	0	0	0	0	0	0	0	0	0	0	0	0	0	0	0	0
501.94	0	0	3.94213	0	0	0	0	0	0	0	0	0	0	0	0	0	0	0	0	0	0	0	0	0	0	0	0	0	0	0	0	0	0	0	0	0	0	0	0	0	0	0	0	0	0	0	0	0	0
502.98	4.73027	0	4.10934	3.67152	0	0	0	0	0	0	0	0	0	0	0	0	0	0	0	0	0	0	0	0	0	0	0	0	0	0	0	0	0	0	0	0	0	0	0	0	0	0	0	0	0	0	0	0	0
504.02	8.56958	6.86041	0.333799	3.41625	0	0	0	0	0	0	0	0	0	0	0	0	0	0	0	0	0	0	0	0	0	0	0	0	0	0	0	0	0	0	0	0	0	0	0	0	0	0	0	0	0	0	0	0	0
505.07	0	7.01538	7.83927	0	0	0	0	0	0	0	0	0	0	0	0	0	0	0	0	0	0	0	0	0	0	0	0	0	0	0	0	0	0	0	0	0	0	0	0	0	0	0	0	0	0	0	0	0	0
505.97	0	0	8.33232	0	0	0	0	0	0	0	0	0	0	0	0	0	0	0	0	0	0	0	0	0	0	0	0	0	0	0	0	0	0	0	0	0	0	0	0	0	0	0	0	0	0	0	0	0	0
507.01	0	0	1.02749	0	0	0	0	0	0	0	0	0	0	0	0	0	0	0	0	0	0	0	0	0	0	0	0	0	0	0	0	0	0	0	0	0	0	0	0	0	0	0	0	0	0	0	0	0	0
508.05	0	0	0	0	0	0	0	0	0	0	0	0	0	0	0	0	0	0	0	0	0	0	0	0	0	0	0	0	0	0	0	0	0	0	0	0	0	0	0	0	0	0	0	0	0	0	0	0	0
508.95	2.75083	0	0	0	0	0	0	0	0	0	0	0	0	0	0	0	0	0	0	0	0	0	0	0	0	0	0	0	0	0	0	0	0	0	0	0	0	0	0	0	0	0	0	0	0	0	0	0	0
510	11.5482	0	0	0	0	0	0	0	0	0	0	0	0	0	0	0	0	0	0	0	0	0	0	0	0	0	0	0	0	0	0	0	0	0	0	0	0	0	0	0	0	0	0	0	0	0	0	0	0
511.06	4.44026	0	0	1.25772	0	0	0	0	0	0	0	0	0	0	0	0	0	0	0	0	0	0	0	0	0	0	0	0	0	0	0	0	0	0	0	0	0	0	0	0	0	0	0	0	0	0	0	0	0
511.96	0	0	0	0	0.606231	0	0	0	0	0	0	0	0	0	0	0	0	0	0	0	0	0	0	0	0	0	0	0	0	0	0.0884998	0.00252688	0	0	0	0	0	0	0	0	0	0	0	0	0	0	0	0	0
513.03	0	0	0	1.18645	0	0	0	0	0	0	0	0	0	0	0	0	0	0	0	0	0	0	0	0	0	0	0	0	0	0	0	0	0	0	0	0	0	0	0	0	0	0	0	0	0	0	0	0	0
513.93	0	0	0	0	0	0	0	0	0	0	0	0	0	0	0	0	0	0	0	0	0	0	0	0	0	0	0	0	0	0	0	0	0	0	0	0	0	0	0	0	0	0	0	0	0	0	0	0	0
515	0	0.935685	2.29132	0	0	0	0	0	0	0	0	0	0	0	0	0	0	0	0	0	0	0	0	0	0	0	0	0	0	0	0	0	0	0	0	0	0	0	0	0	0	0	0	0	0	0	0	0	0
516.06	0	1.80687	0	0	0	0	0	0	0	0	0	0	0	0	0	0	0	0	0	0	0	0	0	0	0	0	0	0	0	0	0	0	0	0	0	0	0	0	0	0	0	0	0	0	0	0	0	0	0
516.96	0	0	0	0	0	0	0	0	0	0	0	0	0	0	0	0	0	0	0	0	0	0	0	0	0	0	0	0	0	0	0	0	0	0	0	0	0	0	0	0	0	0	0	0	0	0	0	0	0
518.03	0	0	0	0	0	0	0	0	0	0	0	0	0	0	0	0	0	0	0	0	0	0	0	0	0	0	0	0	0	0	0	0	0	0	0	0	0	0	0	0	0	0	0	0.00431636	0	0	0	0	0
518.93	7.70202	0	2.29356	1.28283	0	0	0	0	0	0	0	0	0	0	0	0	0	0	0	0	0	0	0	0	0	0	0	0	0	0	0	0	0	0	0	0	0	0	0	0	0	0	0	0.0158997	0	0	0	0	0
520	4.3694	0	0.605461	0	0	0	0	0	0	0	0	0	0	0	0	0	0	0	0	0	0	0	0	0	0	0	0	0	0	0	0	0	0	0	0	0	0	0	0	0	0	0	0	0	0	0	0	0	0
521.04	0	0	3.38368	0	0	0	0	0	0	0	0	0	0	0	0	0	0	0	0	0	0	0	0	0	0	0	0	0	0	0	0	0	0	0	0	0	0	0	0	0	0	0	0	0	0	0	0	0	0
521.94	0	0	2.70378	0	0	0	0	0	0	0	0	0	0	0	0	0	0	0	0	0	0	0	0	0	0	0	0	0	0	0	0	0	0	0	0	0	0	0	0	0	0	0	0	0	0	0	0	0	0
522.98	0	0	0	2.5879	0	0	0	0	0	0	0	0	0	0	0	0	0	0	0	0	0	0	0	0	0	0	0	0	0	0	0	0	0	0	0	0	0	0	0	0	0	0	0	0	0	0	0	0	0
524.02	0	0	0	0	0	0	0	0	0	0	0	0	0	0	0	0	0	0	0	0	0	0	0	0	0	0	0	0	0	0	0	0	0	0	0	0	0	0	0	0	0	0	0	0	0	0	0	0	0
525.07	0	1.56575	0	0	3.06086	0	0	0	0	0	0	0	0	0	0	0	0	0	0	0	0	0	0	0	0	0	0	0	0	0	0	0	0	0	0	0	0	0	0	0	0	0	0	0	0	0	0	0	0
525.97	0	2.28535	0	0	0	0	0	0	0	0	0	0	0	0	0	0	0	0	0	0	0	0	0	0	0	0	0	0	0	0	0	0	0	0	0	0	0	0	0	0	0	0	0	0	0	0	0	0	0
527.01	0	6.21831	0.347201	0	0	0	0	0	0	0	0	0	0	0	0	0	0	0	0	0	0	0	0	0	0	0	0	0	0	0	0	0	0	0	0	0	0	0	0	0	0	0	0	0	0	0	0	0	0
528.05	0	11.3705	0	0	0	0	0	0	0	0	0	0	0	0	0	0	0	0	0	0	0	0	0	0	0	0	0	0	0	0	0	0	0	0	0	0	0	0	0	0	0	0	0	0	0	0	0	0	0
528.95	0	10.9947	0	0	0.630072	0	0	0	0	0	0	0	0	0	0	0	0	0	0	0	0	0	0	0	0	0	0	0	0	0	0	0	0	0	0	0	0	0	0	0	0	0	0	0	0	0	0	0	0
530	0	0	5.6938	0.95051	2.57536	0	0	0	0	0	0	0	0	0	0	0	0	0	0	0	0	0	0	0	0	0	0	0	0	0	0	0	0	0	0	0	0	0	0	0	0	0	0	0	0	0	0	0	0
531.04	0	0	9.79828	0	0	0	0	0	0	0	0	0	0	0	0	0	0	0	0	0	0	0	0	0	0	0	0	0	0	0	0	0	0	0	0	0	0	0	0	0	0	0	0	0	0	0	0	0	0
531.94	0	0	9.17305	0	2.35893	0	0	0.196823	0	0	0	0	0	0	0	0	0	0	0	0	0	0	0	0	0	0	0	0	0	0	0.139031	0	0	0	0	0	0	0	0	0	0	0	0	0	0	0	0	0	0
532.98	5.20898	0	0	0	0.306536	0.964564	0.608747	0.279494	0	0	0.488032	0.790434	0	0	0	0	0	0	0	0	0	0	0	0	0	0	0	0	0	0	0	0	0	0	0	0	0	0	0	0	0	0	0	0	0	0	0	0	0
534.02	4.395	0	0	0	0	2.66594	1.63172	1.88173	2.2286	1.43864	1.93634	2.07774	1.6403	0	0	0	0	0	0	0	0	0	0	0	0	0	0	0	0	0	0	0.00387882	0	0	0	0	0	0	0	0	0	0	0	0	0	0	0	0	0
535.07	1.33846	0	0	0	0	2.87026	2.73897	3.95924	4.67222	3.84966	3.43171	3.50192	4.32552	0	0	0	0	0	0	0	0	0	0	0	0	0	0	0	0	0	0	0.0241792	0	0	0	0	0	0	0	0	0	0	0	0	0	0	0	0	0
535.97	0	0	0	0	0	3.52878	4.99993	6.67262	8.28846	6.52855	5.82142	6.23449	7.11775	0	0	0.346041	0	0	0	0	0	0	0	0	0	0	0	0	0	0	0	0	0	0	0	0	0	0	0	0	0	0	0	0	0	0	0	0	0
537.01	10.8233	0	0	0.561676	4.58096	6.14694	8.02273	10.4791	13.2404	10.0786	9.61198	9.87773	10.8673	0	0	0.737397	0	0	0	0	0	0	0	0	0	0	0	0	0	0	0	0	0	0	0	0	0	0	0	0	0	0	0	0	0	0	0	0	0
538.05	10.4833	2.71582	10.1518	0.912536	3.1088	8.15127	12.6456	16.5818	19.9572	14.7817	14.464	15.0071	15.7845	0	0	1.51797	0	0	0	0	0	0	0	0	0	0	0	0	0	0	0	0	0	0	0	0	0	0.00482869	0	0	0	0	0	0	0	0	0	0	0
538.95	0	5.58029	6.10984	3.4879	4.85781	13.0496	17.3841	23.6126	27.6899	21.3947	19.9061	21.0499	22.1829	0	0	2.39256	0	0	0	0	0	0	0	0	0	0	0	0	0	0	0	0	0	0	0	0	0	0	0	0	0	0	0	0	0	0	0	0	0
540	0	7.66703	0	5.23721	2.61941	18.3971	22.8164	32.1519	36.5571	30.2825	27.0234	28.128	30.0024	0.301683	0	4.22846	0	0	0	0	0	0	0	0	0	0	0.034154	0	0	0	0	0	0	0	0.0931563	0	0	0	0	0	0	0	0	0	0	0	0	0	0
541.04	0	13.8166	1.86364	8.4936	8.05792	24.9937	29.1242	41.0001	46.6085	40.0299	35.6501	36.2565	38.7623	27.2581	0	5.54921	0	0	0	0	0	0	0	0	0	0.0549583	0	0	0	0	0	0.108024	0	0	0	0	0	0	0	0	0	0	0	0	0	0	0	0	0
541.94	0.611608	11.8424	6.27373	20.8957	10.9249	30.5012	37.3696	50.3821	58.1918	49.9956	43.7494	44.6721	48.0676	45.5844	0	4.725	0	0	0	0	0	0	0	0	0	0.000569144	0	0	0	0	0	0.0653855	0.0162336	0	0	0	0	0	0	0	0	0	0	0	0	0	0	0	0
542.98	8.72151	11.2469	6.93662	23.9189	17.6086	35.7787	45.2296	60.5631	68.9462	60.6617	52.423	53.3657	58.0537	60.9779	0	2.59973	0.0758196	0	0	0	0	0	0	0	0	0	0	0	0	0	0	0	0	0	0	0	0	0	0	0	0	0	0	0	0	0	0	0	0
544.02	17.056	8.67805	10.212	27.0918	23.9058	40.5999	54.7744	73.0475	81.8526	72.9975	62.4809	63.074	69.1089	75.9163	0	0	0.228991	0	0	0	0	0	0	0	0	0	0	0.0127358	0.00585292	0.0906388	0.0666377	0	0	0	0	0	0	0	0	0	0	0	0	0	0	0	0	0	0
545.07	23.9407	25.2582	13.1568	17.1179	33.461	48.7936	61.8569	84.5963	94.6722	85.3716	73.9276	72.5522	79.4409	88.1975	0	0	0.453017	0	0	0	0	0	0	0	0	0	0	0	0	0.209393	0	0	0	0	0	0	0	0	0	0	0	0	0.0152301	0	0	0	0	0	0
545.97	19.1592	12.632	13.8819	22.7759	31.5051	56.6248	68.6042	96.3717	106.624	97.2506	82.146	81.8917	89.6903	98.7146	0	0	0.551719	0	0	0	0	0	0	0	0.0882047	0	0.0269995	0	0	0	0	0	0	0	0	0	0	0	0	0	0	0	0	0	0	0	0	0	0
547.01	15.031	10.902	24.1164	24.4295	31.0395	61.6826	72.9891	104.626	117.124	106.445	89.3679	89.7523	98.303	108.624	12.2874	0	0.72952	0	0	0	0	0	0	0	0	0	0	0.0707316	0	0	0.00738336	0	0	0	0	0	0.0444533	0	0	0	0	0	0	0	0	0	0	0	0
548.05	19.0409	11.3895	24.2066	33.2483	31.4013	63.5528	78.1896	110.73	125.316	111.795	95.3112	96.0996	104.671	116.462	41.575	0	0.627046	0	0	0	0	0	0	0	0	0.0666274	0	0.0149264	0	0	0.00259858	0	0	0	0	0	0	0	0	0	0	0	0	0	0	0	0	0	0
548.95	19.8274	29.2013	28.7273	31.4792	38.3113	67.3371	82.8272	113.989	129.82	116.109	100.329	99.6686	109.223	120.918	64.3561	0	0.743254	0	0	0	0	0	0	0	0	0	0	0.00345741	0	0.0763688	0	0	0	0.0991242	0.136028	0	0	0	0	0	0	0	0	0	0	0	0	0	0
550	14.958	27.2365	29.6274	38.5208	37.9185	70.0408	86.9402	117.54	132.99	120.446	102.811	101.68	112.508	124.152	82.925	0	1.33873	0	0	0	0	0	0	0	0	0	0.163554	0.337664	0	0.118748	0	0	0	0	0.07096	0	0	0	0	0	0	0	0	0	0	0	0	0	0
551.04	6.10769	25.2737	30.8471	36.587	37.4877	70.8134	89.4131	120.166	137.033	123.579	104.713	104.131	113.969	127.381	95.4546	0	2.13211	0	0	0	0	0	0	0	0	0	0.237421	0.386406	0	0.0767269	0.110672	0	0	0	0	0	0	0.0163956	0	0.00601381	0	0	0	0	0	0	0	0	0
551.94	15.2198	15.4548	32.5221	28.6709	39.3335	69.3115	90.5931	121.908	140.811	125.556	106.501	104.955	114.428	129.149	102.376	0	3.26391	0	0	0	0	0	0	0	0.105808	0	0.101697	0.0591402	0	0.0356453	0.121739	0	0	0	0	0	0	0	0	0	0	0	0	0	0	0	0	0	0
552.98	22.6291	19.28	34.9361	31.6678	42.747	69.9712	92.7732	123.096	142.867	127.732	107.657	107.183	116.898	129.507	105.639	0	3.60879	0	0	0	0	0	0	0	0.0228594	0	0	0	0	0	0	0	0	0	0	0	0	0	0	0	0	0	0	0	0	0	0	0	0
554.02	27.4142	19.9352	34.7271	39.2682	42.0117	72.4587	93.3262	124.859	144.471	129.541	109.452	108.687	119.29	131.041	108.082	0	2.2786	0	0	0	0	0	0	0	0	0	0	0.0164473	0	0	0	0.127191	0	0.155476	0	0	0	0	0	0	0	0	0	0	0	0	0	0	0
555.07	31.3479	23.4516	36.1554	38.2444	41.0954	73.2546	94.9983	126.264	145.678	131.561	111.04	111.285	122.355	134.389	110.865	0	0	0	0	0	0	0	0	0	0	0	0	0.158409	0	0	0	0.189301	0	0.23202	0	0	0	0	0	0	0	0	0	0	0	0	0	0	0
555.97	35.8648	33.4783	41.9028	31.8585	44.8809	76.0538	97.28	129.852	148.777	134.614	114.669	112.534	125.042	139.7	113.331	0	0	0	0	0	0	0	0	0	0	0	0	0.155561	0.078269	0.05289	0	0.19035	0	0.112775	0	0	0.04599	0	0	0	0	0	0	0	0	0	0	0	0
557.01	35.9701	38.337	36.5623	35.627	47.4621	80.0079	100.234	135.662	153.865	139.233	119.357	117.567	130.019	143.888	116.758	0	0	0	0	0	0	0	0	0.0722078	0	0	0	0.22898	0.046836	0	0	0	0	0.0902729	0	0	0.0993541	0	0	0	0	0	0	0	0	0	0	0	0
558.05	31.3328	26.8462	39.1112	40.3123	50.5096	81.5788	102.112	141.278	160.567	144.015	123.37	121.647	133.351	146.633	119.97	0	0	0	0	0	0	0	0	0	0	0	0	0.025149	0	0	0	0	0	0.110116	0	0	0.0100819	0	0	0	0	0	0	0	0	0	0	0	0
558.95	31.1642	20.9718	36.4271	39.9198	52.0936	84.0299	105.77	144.251	165.24	148.11	126.863	125.183	136.497	150.04	123.756	5.18959	0	0.181051	0	0	0	0	0	0	0.0362744	0	0	0.111056	0	0	0	0.0345483	0.0354026	0.120714	0	0	0	0	0	0	0	0	0	0	0	0	0	0	0
560	32.8997	21.263	44.2494	33.4923	51.3388	84.3781	109.477	147.198	167.958	151.325	129.912	128.315	139.28	155.185	125.945	14.0279	0	0.516407	0	0	0	0	0	0	0.130298	0.0409193	0.120204	0.00575244	0	0.101413	0	0.259767	0	0.0028038	0	0	0	0	0	0	0	0	0	0	0	0	0	0	0
561.04	27.2548	25.0212	34.8899	37.642	47.6443	86.7364	111.967	150.089	172.356	155.638	132.472	130.472	142.495	158.937	128.492	20.1821	0	1.07355	0	0	0	0	0.000101307	0	0	0.0885361	0.297823	0.0377741	0.0118317	0.0944373	0	0.283083	0.108425	0	0	0.0328236	0	0.00366117	0	0	0	0	0	0	0	0	0	0	0
561.94	24.4689	34.4465	34.9327	45.8699	44.9291	84.9568	112.299	151.112	174.01	156.366	133.309	130.841	144.099	159.992	129.861	23.9399	0	1.57876	0	0	0	0	0	0.0761939	0	0.0134449	0.162351	0	0.240593	0.259107	0.090283	0.0134529	0.000743965	0	0	0.0266347	0	0	0	0	0	0	0	0	0	0	0	0	0
562.98	20.9765	38.2772	30.7178	49.0359	42.7782	87.0587	111.975	150.74	172.467	154.438	134.332	130.58	142.165	158.387	129.211	24.9059	0	2.41299	0	0	0	0	0	0	0.00157431	0	0	0.310108	0.25345	0.0241952	0	0	0	0	0	0	0	0	0	0	0	0	0	0.0195302	0	0	0	0	0
564.02	20.6488	39.6947	31.886	44.8939	47.2986	85.8436	109.037	148.907	167.526	150.494	132.449	128.947	138.101	155.547	127.181	25.5365	0	2.29984	0	0	0	0	0	0	0.00132824	0.0403752	0	0.276938	0	0	0	0	0	0	0.0672512	0.00224358	0.00943409	0	0	0	0	0	0	0	0	0	0	0	0
565.07	25.8758	30.0279	31.8683	34.1187	51.3172	85.6767	106.98	146.696	163.406	148.187	129.143	125.951	134.116	152.151	125.143	25.5103	0	0	0	0	0	0	0.128882	0	0	0	0	0.0778497	0	0	0.13924	0	0.186075	0	0.0350363	0	0.0476565	0	0	0	0	0	0	0	0	0	0	0	0
565.97	28.6398	20.825	25.8945	34.898	52.6589	81.7788	104.442	140.904	158.583	144.221	126.449	121.594	131.806	148.489	121.484	25.4507	0	0	0	0	0	0	0.176695	0.00886276	0	0	0	0	0	0	0.284084	0	0.12225	0.069974	0	0	0	0	0	0	0	0	0	0	0	0	0	0	0
567.01	36.0008	12.4322	26.1041	36.2444	50.8344	78.8976	100.864	136.437	155.074	139.849	122.485	118.279	127.985	144.285	118.023	25.0646	0	0	0	0	0	0.161873	0	0	0	0	0	0	0	0.100215	0.16214	0.0976583	0.0817415	0.159194	0	0	0	0	0	0	0	0	0	0	0	0	0	0	0
568.05	22.6252	16.1432	29.4925	35.0745	49.2665	76.6281	95.8755	133.75	151.227	134.063	117.969	113.49	123.347	139.126	113.599	24.5962	0	0	0	0	0	0	0	0	0.0327862	0.0508536	0.23365	0.0951724	0	0.101173	0.0607935	0	0	0.00352317	0	0.14183	0	0	0	0	0	0	0	0	0	0	0	0	0
568.95	19.4488	19.0579	37.9848	33.1792	44.0689	73.7915	95.4594	130.448	146.768	129.714	112.693	110.403	118.768	135.109	111.036	24.2489	0	0	0	0	0	0	0	0	0	0.0526715	0.206103	0	0.0468813	0.133043	0	0	0	0.00728405	0	0	0	0	0	0	0	0	0	0	0	0	0	0	0
570	13.1733	24.8587	35.2554	32.0714	39.1601	72.3732	94.4263	125.14	140.951	126.18	109.812	106.654	115.156	129.307	107.757	24.0319	0	0	0.755869	0	0	0	0	0.111279	0	0	0.127736	0.130018	0.0233346	0.18239	0.105936	0	0	0.14214	0	0	0	0.0100158	0	0	0	0	0	0	0	0	0	0	0
571.02	27.3871	30.1954	27.557	32.6352	41.4045	72.1454	90.6419	120.999	135.48	122.832	105.88	104.165	112.412	125.516	106.213	23.9118	0	0	1.90826	0	0	0	0	0	0	0	0.34191	0.184535	0	0.114653	0.144687	0	0	0.0875988	0	0	0	0	0	0	0	0	0	0	0	0	0	0	0
572.05	24.9626	26.3206	31.69	34.7207	41.5477	71.1797	88.5638	120.311	132.843	119.885	104.59	102.767	110.086	121.755	102.804	23.3438	0	0	3.01001	0	0	0	0	0.121101	0	0.0316769	0.20603	0.173688	0	0.0273523	0.100107	0.00594894	0	0	0	0	0	0	0	0	0	0	0	0	0	0	0	0	0
572.94	22.8428	27.6547	33.5649	39.6826	39.813	70.4328	86.7328	118.06	131.089	118.93	103.763	100.584	108.443	121.478	100.644	23.1476	1.51278	0	2.14237	0	0	0	0	0.0077105	0	0.0447538	0	0.102577	0.101546	0.0527817	0.0256187	0.0412393	0.0170745	0	0	0	0	0	0	0	0	0	0	0	0	0	0	0	0
573.97	15.9568	25.0168	33.0174	32.3355	37.0899	71.2332	86.3086	116.531	130.558	118.003	103.42	98.8987	107.924	120.03	99.3065	22.8033	2.5555	0	1.10509	0	0	0	0.0504183	0	0	0.059557	0	0.135348	0.158959	0.131444	0.000781223	0.0489922	0	0	0	0	0	0.0262785	0	0	0	0	0	0	0	0	0	0	0
575	32.5982	31.0597	26.1458	28.1989	38.2224	68.0976	84.0481	113.917	129.571	117.019	101.347	97.4308	106.955	118.952	98.2171	22.8894	2.98756	0	0	0	0	0	0	0	0	0	0	0.0461999	0.262118	0.0786789	0	0	0.0425646	0.0100341	0.00661823	0	0	0	0	0.01343	0	0	0	0	0	0	0	0	0
576.02	30.1228	28.7024	27.8361	25.7437	40.0225	65.6198	82.9345	113.758	127.448	115.03	100.493	96.223	105.372	116.878	97.2806	22.6495	3.44218	0	0	0	0	0	0	0	0	0	0	0	0.212022	0.103274	0	0	0.0404844	0.101608	0	0.0290311	0.0249679	0	0	0.0966934	0.0114563	0	0	0	0	0	0	0	0
577.05	18.5326	19.5768	30.8795	29.592	42.0105	67.4603	81.3342	111.762	125.301	112.995	98.5324	95.1396	102.94	115.735	95.9437	22.9635	3.68906	0	0	0	0	0	0	0	0.142207	0	0	0	0.201095	0.104386	0	0	0.0152785	0.162836	0	0.171107	0	0.00518774	0	0.0173211	0	0	0	0	0	0	0	0	0
577.94	17.5678	12.8793	24.076	36.0732	41.5045	67.7799	81.4562	109.995	123.176	110.707	96.5002	95.1168	101.882	113.57	94.9564	22.5625	3.86274	0	0	0	0	0	0.0400061	0	0.142689	0.0711872	0.142929	0	0.258485	0.0306523	0.00170204	0	0.0463743	0.108126	0	0.0576156	0	0	0	0	0	0	0	0	0	0	0	0	0
578.97	20.6556	22.9769	13.2574	33.7905	38.4699	63.2987	80.7619	105.309	120.059	108.462	93.8251	95.0236	99.6824	111.088	92.9105	22.2568	3.77483	0	0	0	0	0	0	0	0.0861357	0.0331326	0.192089	0	0.260444	0.0428075	0	0.132886	0.0800479	0.0165045	0	0	0	0	0	0	0	0	0	0	0	0	0	0	0
580	19.3018	32.1236	11.948	25.7812	34.7864	59.0756	77.4567	103.614	113.834	105.291	91.969	91.1413	97.6025	107.508	91.1007	21.8736	4.12107	0	0	0.412664	0	0	0	0	0.156592	0.198349	0.041356	0	0.0846941	0.180524	0	0.205509	0.0811882	0	0	0	0	0	0	0	0	0	0	0	0	0	0	0	0
581.02	13.8341	23.561	16.2416	26.4056	34.2898	60.024	74.9773	102.01	112.449	101.845	89.0814	86.6816	94.5475	105.004	88.3455	21.9476	4.44194	0	0	1.36982	0	0	0	0.0487483	0.285548	0.138925	0	0	0	0.0592102	0.065592	0.156358	0	0	0	0.0399122	0	0	0	0.016461	0	0	0	0	0	0	0	0	0
582.05	15.9616	22.486	27.3325	32.7496	34.6993	59.5087	73.7155	99.479	109.994	98.8899	85.1916	84.3063	91.9835	101.438	85.4643	21.6282	4.6007	0	0	2.20344	0	0	0	0.0999925	0.178131	0	0.121916	0.168507	0.0239027	0	0	0.104017	0.00891168	0.0672984	0	0.00997024	0	0	0	0	0	0	0.0283749	0	0	0	0	0	0
582.94	21.1856	17.6101	29.8699	27.4338	37.2872	55.7981	72.2592	94.7784	107.768	95.4222	82.5073	83.4427	89.1363	97.1724	82.2732	21.0582	4.42981	0.0586554	0	2.64561	0	0	0	0	0	0	0.436357	0.192027	0.106307	0	0	0	0.0444883	0.0875987	0	0	0	0	0	0	0	0	0.0458754	0	0	0	0	0	0
583.97	23.3994	16.89	31.0692	20.5228	33.5981	50.4964	68.4455	90.4898	101.344	91.0509	79.3734	79.9551	85.9178	91.7838	79.3763	20.3289	4.45226	0.896845	0	1.11847	0	0	0	0	0	0	0.117774	0	0.125295	0.0688332	0	0	0.0454528	0.049584	0.00900865	0.00520213	0	0	0	0	0	0	0	0	0	0	0	0	0
585	17.3156	18.4099	22.6814	14.7937	30.8516	50.3479	65.0048	85.327	97.4028	86.773	75.9817	75.3569	81.992	88.424	75.6203	19.6062	4.44322	1.40007	0	0	0	0	0	0	0.0385994	0	0	0	0.0943443	0	0	0	0.0501774	0.0170312	0	0.0895432	0	0	0	0	0	0	0	0	0	0	0	0.0084113	0
586.02	14.9653	13.3905	24.0791	18.4124	28.6907	50.4635	63.9478	81.5521	93.3694	83.2796	72.0631	71.3434	77.6305	84.7735	72.077	18.7576	4.60529	1.54381	0	0	0	0	0	0	0.315757	0	0	0	0	0	0	0.00697194	0.074155	0.0915111	0	0.0616239	0	0	0	0	0.0339264	0.0898023	0	0	0	0	0	0.0172933	0
587.05	11.3258	12.552	24.0037	14.76	27.3899	46.4597	61.6843	79.5687	91.326	81.1535	69.4193	69.0282	74.4109	82.152	70.1574	18.1873	4.73428	1.61636	0	0	0	0	0	0	0.140524	0.036976	0.187933	0	0	0.00575178	0	0.101351	0.116576	0.0731984	0	0	0	0	0	0	0	0.0887546	0	0	0	0	0	0	0
587.94	13.5919	15.8683	22.1572	17.4381	20.402	43.7755	58.3961	76.9325	87.1035	78.4129	67.5639	67.1824	71.571	78.5072	68.1545	18.0618	4.97662	1.8038	0	0	0	0	0	0.0345513	0.149758	0.00786324	0.104977	0	0.00120701	0	0	0.0193102	0.00307612	0	0	0	0	0	0	0	0	0	0	0	0	0	0	0	0
588.97	10.9388	23.3669	19.8581	17.8082	21.0092	43.3075	55.6154	74.3923	82.9667	75.1984	65.6732	64.9499	68.8907	75.2771	65.1082	17.4516	4.88212	2.02208	0	0	0	0	0	0.104232	0.126479	0.391088	0	0.06486	0.178464	0	0	0	0	0.00676134	0	0	0	0	0	0	0	0	0	0	0	0	0	0	0
590	16.0549	18.5785	18.5328	22.5468	21.9866	44.1692	53.962	71.8311	79.1532	71.438	63.0178	61.9534	65.9751	72.3878	62.3777	16.98	4.89406	2.24987	0	0	0.334427	0	0	0	0.172248	0.0831547	0	0	0.174096	0	0.0847665	0	0.0429962	0.020132	0	0	0	0.0492295	0	0	0	0	0	0	0	0	0	0	0
591.02	10.2684	18.1632	7.40959	23.8796	25.6471	43.4719	51.7507	68.8855	76.9431	69.2326	59.5134	58.5599	63.8442	70.8664	59.4385	16.6086	4.72113	2.13794	0	0	0.933252	0	0	0	0.0526323	0	0	0.0432626	0	0	0.0942295	0	0.135369	0	0	0	0	0	0	0	0	0	0	0	0	0	0	0	0
592.05	12.2843	18.6711	1.74253	16.3239	24.1903	42.1294	50.1394	65.7032	74.821	66.8747	56.7254	56.2377	61.5167	68.0976	57.2615	16.584	4.9246	2.38484	0	0	1.25881	0	0	0	0	0	0.0484284	0.0331819	0.00642438	0	0.00392641	0	0.132726	0	0	0	0	0.00834041	0	0	0	0	0	0	0	0	0	0	0
592.94	6.91614	17.1401	10.9186	9.64353	23.5955	37.2341	49.3087	64.1882	72.6023	64.3358	55.7557	54.5438	59.0365	65.9026	55.9165	15.8036	4.88327	2.41229	0	0	1.5157	0	0	0	0.046018	0	0	0.0517699	0	0.0155298	0	0.0300171	0.0998836	0	0	0	0	0	0	0	0.010005	0	0	0	0	0	0	0	0
593.97	6.62141	6.55063	16.9808	9.02031	16.5363	34.8235	47.8152	62.0764	69.3503	61.9318	54	53.2521	57.4233	63.9538	54.9951	15.4678	5.05268	2.22876	0	0	0.868675	0	0	0.106123	0	0	0	0	0.108365	0	0	0.106706	0	0	0	0	0.0158742	0	0	0	0	0	0	0.0212942	0	0	0	0	0
595	0	12.05	15.2551	17.9692	14.4361	35.2067	45.2932	59.91	66.3353	60.5068	52.1876	51.8266	55.6817	62.0882	52.4628	15.2951	4.96537	2.0951	0	0	0	0	0	0.145301	0	0.0419	0	0	0	0	0	0.134886	0.0298545	0.0762789	0	0	0	0	0	0	0	0	0	0	0	0	0	0	0
596.02	0	16.9436	12.6058	15.9177	16.2995	36.3028	43.5024	58.6004	63.9767	58.0045	50.3129	49.9101	54.2853	58.6411	50.0798	15.3943	5.08168	2.33636	0.157434	0	0	0	0	0	0	0.14568	0	0	0	0	0	0	0.0819559	0.102306	0	0	0	0	0	0	0	0	0	0	0	0	0	0	0
597.05	12.9231	8.1543	12.1353	14.518	19.0941	34.7056	42.1978	56.5777	62.7638	55.6501	48.6828	48.5695	51.7091	56.5679	48.3648	14.8294	4.98782	2.40474	0.197601	0	0	0	0	0	0.042579	0.135292	0	0	0	0	0	0.103772	0	0	0	0	0	0	0	0	0	0	0	0	0	0	0	0	0
597.94	13.578	0	7.33609	14.6053	20.242	34.0798	41.1924	53.4964	59.8315	53.4808	46.8324	45.8374	49.9495	55.0785	46.9991	14.5335	5.21159	2.31333	0.356462	0	0	0	0	0	0.0551258	0.00557942	0.185955	0	0	0	0	0	0	0	0.00388953	0	0.0576236	0	0	0	0	0	0	0	0	0	0	0	0
598.97	16.4813	10.0594	7.72463	19.4465	17.6122	32.6064	39.4377	52.4392	57.8839	51.7474	45.6408	43.6491	48.1122	54.0504	45.7259	14.1612	5.5017	2.47651	0.129336	0	0	0	0	0	0	0	0.0170546	0.0746368	0	0	0	0	0	0	0.0334816	0	0.0247417	0	0.0332606	0	0	0	0	0	0	0	0	0	0
600	19.2072	14.2039	10.1524	18.7469	14.148	30.7294	38.2423	49.936	55.958	50.1505	43.6548	41.5156	46.3471	52.0291	44.545	13.8661	5.52815	2.55739	0.283834	0	0	0.349314	0	0	0	0	0	0.251453	0	0	0.0920197	0	0.00475615	0	0	0	0	0	0.0181361	0	0.0131228	0	0	0.0103141	0	0	0	0	0
601.02	18.6351	6.77952	12.9244	16.4154	9.85258	29.4963	35.9641	47.3652	54.272	48.5565	41.4132	40.4424	44.449	50.0696	42.7455	13.513	5.17358	2.51804	0.369784	0	0	0.692443	0.0138788	0	0.00105283	0	0	0.218485	0	0.117949	0.0379211	0.0128775	0	0.0770232	0	0	0	0	0	0	0	0	0	0	0	0	0	0	0
602.05	12.7623	1.77875	13.2616	14.4147	11.7328	29.063	34.4061	44.529	50.5373	46.3879	40.0126	39.1844	42.6641	47.5237	40.7955	13.2071	4.8738	2.28119	0.622615	0	0	1.83109	0	0.0498627	0	0	0	0	0	0.163055	0	0	0	0.0407055	0	0	0	0	0	0	0	0	0	0	0	0	0	0	0
602.94	7.01298	15.175	16.3439	14.7318	11.727	27.0549	33.8647	44.5048	48.7943	43.7033	38.8688	37.5508	40.8821	44.6773	39.2973	12.9292	4.8888	2.3486	0.566615	0	0	3.09287	0	0	0	0	0	0	0	0.0639062	0	0	0	0	0	0	0	0	0	0	0	0	0	0	0	0	0	0	0
603.97	0	12.0867	15.1024	14.4713	14.9163	24.7335	33.9996	42.923	46.8183	41.9514	36.9199	35.8896	38.9847	42.9763	37.9703	12.2432	4.76467	2.41188	0.630043	0	0	2.21125	0	0	0	0	0	0	0.138627	0	0.0665581	0	0	0	0	0	0	0	0	0	0	0	0	0	0	0	0	0	0
605	0	0	16.6547	10.1069	13.9352	23.8833	32.7455	39.9893	44.7225	39.649	34.5901	34.2421	37.0208	41.7618	36.5226	11.8484	4.84888	2.41042	0.408646	0	0	0	0	0	0	0.0907955	0	0	0.0525644	0.0945673	0.139827	0	0.0270992	0	0	0	0	0	0	0.0258149	0	0	0	0	0	0	0	0	0
606.02	10.1845	0	11.873	7.77764	11.3616	24.3229	30.4812	37.9383	41.2365	37.6436	33.3823	33.031	35.4038	40.1976	35.1859	11.4306	4.91853	2.47137	0.574401	0	0	0	0	0	0	0.175237	0.0323536	0	0.00113973	0.136072	0.0860707	0	0	0	0	0	0.00699238	0	0	0	0	0	0	0	0	0	0	0	0
607.05	15.6345	9.01913	4.55149	1.89849	11.1824	24.7271	29.284	37.9091	40.3549	36.0718	32.5269	31.3726	33.9091	37.8655	34.2433	11.3758	4.87918	2.61898	0.624599	0	0	0	0	0	0	0.158892	0	0	0	0.00405884	0	0	0	0	0	0	0	0	0	0	0	0	0	0	0	0	0	0	0
607.94	13.2979	16.4226	4.30759	1.87523	12.5321	23.657	29.4839	37.0661	38.8758	35.5004	31.4826	30.0245	32.0578	36.6988	32.8297	10.9291	4.55403	2.5961	0.639457	0	0	0	0	0	0	0.0690487	0	0	0	0	0	0	0	0	0	0	0	0	0	0	0	0	0	0	0	0	0	0.00761987	0
608.97	7.10357	7.57123	10.5761	6.65548	9.03837	21.7128	27.0295	34.5804	37.4134	34.5502	29.3213	28.8561	30.9505	35.5641	31.0014	10.5276	4.56441	2.37786	0.614263	0	0	0	0.0480518	0	0	0	0	0	0	0	0	0	0	0	0	0	0	0	0.0253156	0	0	0	0	0	0	0	0	0	0
610	12.3579	0	8.5495	11.8108	5.4609	20.065	24.7104	32.0754	35.2886	32.7594	27.8419	27.2675	29.5397	33.6296	29.4526	10.2039	4.43667	2.4415	0.700051	0	0	0	0.0354821	0	0	0	0	0	0	0	0	0	0.051925	0	0.00241379	0	0	0.0154579	0.024187	0	0	0	0	0	0	0	0	0	0
611.02	3.10919	0	7.99911	12.5946	6.0387	20.0647	24.2924	31.3233	34.8326	30.8045	26.7536	25.7612	28.3959	31.7464	28.3953	9.87565	4.29303	2.46855	0.654568	0	0	0	0.755496	0	0	0	0	0	0	0	0.181849	0	0	0	0.103945	0	0	0.0811129	0.00229778	0	0	0	0	0.0364964	0	0	0	0	0
612.05	0	0	13.1482	14.1395	3.36111	20.1817	24.7288	29.9067	33.3106	29.2863	25.733	24.9095	27.0716	30.3872	27.6086	9.64857	4.29706	2.34647	0.532195	0	0	0	1.13087	0	0	0	0	0	0.0865067	0	0.150029	0.0713717	0.0191239	0	0.123589	0	0	0.0329857	0	0.00292136	0	0	0	0.0288994	0	0	0	0	0
612.94	0	0	5.65236	12.0176	5.54726	18.588	23.2355	28.7418	31.6811	28.4057	24.479	24.5788	26.7488	29.2674	26.3739	9.31117	4.51916	2.18259	0.58289	0.037096	0	0	1.04335	0	0	0	0.0921461	0	0.0732441	0	0	0.0129956	0	0	0	0.0201677	0	0	0	0	0	0	0	0	0	0	0	0	0
613.97	0	1.82434	2.89494	10.327	12.1391	17.4106	22.2672	26.6068	30.0274	27.0999	23.8913	23.6741	25.5152	27.9517	25.2596	8.95454	4.31456	2.25708	0.596086	0	0	0	0.84042	0	0	0.0692542	0	0	0	0	0	0	0	0.0843764	0	0.0434443	0	0	0	0	0	0	0	0	0	0	0.0288399	0	0
615	6.02089	3.71803	1.75477	8.17783	12.526	17.8346	22.1471	26.573	28.8477	26.0973	22.8815	22.1589	24.0025	27.1249	24.6343	8.82349	4.0805	2.43456	0.524324	0.05777	0	0	0	0.0722026	0	0	0	0	0.0814084	0.034609	0.0856864	0	0	0.00920211	0	0	0	0	0	0	0	0.0230751	0	0	0	0	0	0	0
616.02	8.6596	4.47737	5.45947	5.08272	11.6916	17.9277	21.4749	25.8131	27.8633	24.7259	22.0397	20.9459	22.8416	26.1113	23.9787	8.93836	4.02573	2.45761	0.489648	0.161551	0	0	0	0	0	0	0	0	0.194856	0.0428136	0	0.00666844	0	0	0	0	0	0	0	0	0	0.0360406	0	0.0496458	0	0	0	0	0
617.05	3.80585	3.81508	0	5.98411	6.31606	17.2503	19.9886	25.522	27.1724	23.8385	21.2761	19.915	22.0361	24.9516	22.8284	8.89516	3.95478	2.29538	0.623512	0.198733	0	0	0	0	0	0	0	0	0.135206	0.0222564	0	0	0	0	0	0.0141405	0	0.0142601	0	0.0130076	0	0	0	0.0404909	0	0.0164729	0	0	0
617.94	5.8935	3.15934	4.133	2.89855	5.19203	15.9551	18.6514	23.2567	25.6338	23.0668	20.3743	19.2984	21.5673	24.0948	21.6356	8.42895	3.81041	2.25686	0.603197	0.0600973	0	0	0	0	0	0	0	0.127596	0	0	0	0	0	0	0	0	0	0	0	0.0410639	0.0315114	0	0	0	0	0	0	0	0
618.97	6.24899	0	3.7762	4.60836	7.14542	15.0081	18.5331	22.4073	24.166	22.6219	19.128	17.9996	20.7298	23.0899	20.9859	7.87973	3.60454	2.25892	0.728233	0.0685575	0	0	0	0	0	0	0	0	0	0.01365	0.074233	0	0	0	0	0	0	0	0	0	0.00919814	0	0	0	0	0	0	0	0
620	5.00927	3.80696	3.08004	4.22479	5.94626	13.5819	17.9077	21.2461	22.9339	21.459	17.7122	17.7921	19.8726	22.1446	20.7391	7.47388	3.49039	2.21696	0.777092	0.114361	0	0	0	0.331949	0	0	0	0	0	0.0436294	0.0571414	0	0	0	0.0668848	0	0	0	0	0	0.0722266	0	0	0	0	0	0	0	0
621.02	0	7.60583	0.952115	2.87555	5.09261	13.1433	16.8554	20.6682	22.1727	20.0448	17.2056	17.531	18.5982	20.9337	19.8939	7.67318	3.64871	2.19216	0.9205	0.0935046	0.179348	0	0	0.746428	0	0	0	0	0	0	0	0.0648036	0	0	0.0328561	0	0	0.0308377	0	0	0	0	0.000429003	0.00699424	0	0	0	0	0
622.05	0	0	0	1.99808	7.23277	13.5791	16.5929	20.1791	21.534	19.1642	16.615	17.6294	17.876	20.2815	18.6878	7.68731	3.37386	2.12032	0.652063	0.101915	0	0	0	1.44892	0.00147836	0.0249545	0	0	0.0140736	0	0	0.118774	0	0	0	0	0	0	0	0	0	0	0	0	0	0	0	0	0
622.94	0	0	1.19925	4.92585	5.72709	13.7847	16.7878	19.4513	21.2917	18.3758	16.0812	16.6217	16.9516	19.4546	17.6316	7.27259	3.04564	2.05755	0.53373	0.220113	0	0	0	1.1656	0	0	0	0	0	0	0	0.0516659	0	0	0	0	0	0	0	0	0	0	0	0	0	0	0	0	0.0159475
623.97	0	1.54016	7.55059	6.61926	2.80025	13.6831	15.3067	19.0103	20.4034	17.8701	15.1125	15.5045	16.1823	19.1334	17.1558	6.72893	2.86194	2.06779	0.599888	0.267526	0	0	0	0	0	0	0	0.142989	0.052174	0.0563256	0.135469	0	0.00399275	0	0	0	0	0	0	0.066649	0	0	0	0.0253177	0	0	0.0366305	0	0.0242202
625	1.35875	14.3383	8.89336	5.73379	1.9147	12.4606	14.1281	17.6196	18.6395	17.2768	14.8502	14.3652	15.6535	18.2538	16.5836	6.53364	3.01567	1.99886	0.770504	0.26106	0	0	0	0	0	0	0	0.0118469	0	0	0.0125953	0	0	0.028264	0	0	0	0	0	0.0711741	0	0	0	0	0	0	0	0	0.0465537
626.02	8.28848	12.5244	11.9132	6.99286	6.26512	12.9717	13.4405	16.6771	17.4567	16.8752	14.4178	13.8193	15.1477	17.1282	16.1295	6.19572	2.82655	1.75462	0.589942	0.185426	0	0	0	0	0.0572004	0	0	0	0	0	0.0590604	0	0	0.0109508	0	0	0	0	0	0.00799584	0	0	0	0	0	0	0	0	0.0341683
627.05	2.29562	6.91458	9.32572	6.6022	5.64205	13.2251	13.2876	16.0812	17.172	15.6527	13.7652	13.5425	14.6954	16.0945	15.5273	6.01948	2.8	1.62419	0.553905	0.0258034	0	0	0	0	0	0.182348	0	0	0	0.0120706	0	0	0	0.00757847	0.12796	0	0	0	0	0	0	0	0	0	0	0	0	0	0.0200911
627.94	0	0.352265	8.98714	8.20289	3.36936	12.2231	13.5409	15.4046	16.8475	14.5005	12.919	12.7921	14.1727	15.6496	15.0648	5.90014	2.83228	1.72606	0.413822	0.170693	0	0	0	0	0	0.220572	0	0	0	0.130698	0	0	0.128174	0	0.0521632	0	0	0	0	0	0	0	0	0	0	0	0	0	0
628.97	1.22378	0	2.14835	6.62723	0.56871	9.62377	13.5564	14.2015	15.9009	13.9475	12.4765	11.7524	13.6516	14.8906	14.1245	5.83785	3.13406	1.61523	0.561532	0.291946	0	0	0	0	0	0	0	0	0	0	0	0	0.0329797	0	0.0189425	0	0	0.0409374	0.023146	0	0.054343	0.00846403	0	0.00405153	0	0	0	0.0304361	0
630	0	0	0.737927	7.91976	2.53338	8.76249	12.3813	13.8544	14.7149	13.5841	11.9578	11.0032	13.1019	14.2728	13.5708	5.86027	3.37716	1.58124	0.658967	0.301622	0	0	0	0	0.0328044	0	0	0	0	0	0	0.0181171	0	0	0	0	0	0.0629753	0	0	0	0.0272782	0	0.00712334	0	0	0	0.0438008	0
631.01	0	0.254047	0	7.52217	0.831689	9.88251	10.9267	13.8425	14.2495	12.9861	11.2331	10.7156	12.2788	13.7073	13.1333	5.90293	3.20117	1.58024	0.824335	0.18318	0	0	0	0	0.345674	0	0	0	0.00578362	0	0	0.0090391	0	0	0.00699605	0.0114196	0	0.011615	0	0	0	0	0	0.0348953	0	0	0.0411878	0.034974	0
632.02	0	0	0	6.05285	1.92088	12.072	10.3751	13.5932	13.4252	12.2691	10.7847	10.4409	11.6157	13.3998	13.0941	5.50046	2.87514	1.73735	0.72057	0.261073	0	0.223374	0	0	1.19035	0	0.252059	0	0.176559	0.00168217	0	0	0	0	0	0	0	0	0	0	0	0	0	0	0.00526523	0	0	0	0
633.04	8.38398	0	3.67915	2.69804	0.65424	10.265	10.0322	12.5121	12.6598	11.9611	10.2168	10.0684	10.9835	12.8167	12.3757	5.1081	2.86629	1.63182	0.539422	0.313681	0	0.351573	0	0	0.896079	0	0	0	0.0197452	0.0266575	0	0	0	0	0	0	0	0	0	0	0.0715146	0	0.0173959	0	0.0052435	0	0	0	0
634.05	11.6983	0	0	5.98524	1.04877	6.74965	10.284	11.8158	12.3688	11.4447	9.91994	9.64774	10.7493	12.0199	11.8158	4.90105	2.78656	1.6042	0.55629	0.345014	0	0.161864	0	0	0	0	0	0	0	0	0	0	0	0	0	0.00540278	0	0	0	0	0.0143287	0	0.0215994	0.0115716	0	0	0	0	0
635.07	1.57726	0.814949	4.29308	8.9304	0	4.54284	10.1107	11.2298	11.9751	10.9081	9.82793	9.41762	10.2728	11.2409	11.3895	5.00484	2.88576	1.40532	0.571708	0.197075	0	2.12979e-05	0	0	0	0	0	0	0	0	0	0.0232738	0	0	0	0.0126128	0	0.0741935	0	0	0	0	0.0174175	0.00889516	0	0.0108668	0	0	0
635.94	0.0651447	6.49402	7.54758	3.64468	2.09219	5.62732	9.63612	10.5245	11.5349	10.4727	9.66932	8.82344	9.68694	10.8856	10.9206	4.89676	3.00477	1.22856	0.790806	0.163698	0	0	0	0	0	0	0	0	0	0	0	0.0117228	0	0	0	0	0	0.0615222	0	0	0	0	0	0	0	0	0	0	0
636.95	0	0.206931	4.56046	0	3.20869	7.30458	9.62556	10.2092	10.6225	10.0207	8.52693	8.60969	9.04731	10.8883	10.2187	4.72935	2.75871	1.10366	0.728085	0.156992	0	0	0	0	0	0	0	0	0	0.011602	0	0	0	0	0	0	0.0471209	0.0716101	0	0	0	0	0	0	0	0	0	0	0
637.97	0.782449	0	0	0	5.74914	7.68346	9.12943	9.53802	10.3581	9.57654	7.9106	8.11048	8.58004	10.2987	9.94112	4.28658	2.44382	1.29975	0.696134	0.319191	0.00683175	0	0	0	0	0	0	0	0	0	0.205932	0.0233263	0	0	0	0	0	0	0	0	0	0	0	0	0	0	0	0.00484426	0
638.98	0	2.87577	0	0	5.33534	7.88471	8.58002	9.42519	9.75363	9.18562	7.94955	8.07002	8.48919	9.79638	9.59966	3.95372	2.39979	1.46492	0.544032	0.314449	0.0088073	0.0147072	0	0	0	0	0	0	0	0.100148	0.171383	0.0616369	0	0	0.0328941	0	0	0	0	0	0	0	0.00190923	0	0	0	0	0	0
640	2.29355	9.50031	6.03315	3.90676	5.09249	6.11811	7.99197	9.03372	9.4029	8.6194	7.99638	7.57053	8.24333	9.41988	9.07322	3.95324	2.49586	1.52136	0.514263	0.406749	0.180907	0	0	0	0	0.041284	0.274962	0	0	0.0630228	0.155021	0.0983428	0	0	0.0306876	0	0	0	0	0	0	0.010488	0	0	0.0109628	0	0	0	0
641.01	1.24224	6.8702	3.43327	0	5.5212	6.42705	8.29538	9.5981	9.45236	7.76458	7.63042	7.38103	7.76912	8.93739	8.40879	4.0014	2.36785	1.51875	0.338935	0.174901	0.0358284	0	0	0	0	0.130247	0.227727	0	0	0	0.021592	0.0170105	0	0	0	0	0	0	0	0.026645	0	0.00375773	0	0.0557069	0	0	0	0	0
642.02	0	0	0	5.11773	5.19636	6.5309	7.80252	8.92689	9.45113	7.30769	7.19602	7.2796	7.60305	8.4634	8.24619	4.0146	2.23909	1.58335	0.285591	0.0733395	0.156428	0	0.0503811	0	0	0.0935636	0	0.00344506	0	0	0.00950846	0.00386715	0	0	0	0	0	0	0	0.0471638	0	0	0	0.0748156	0	0	0	0.0530449	0
643.04	0	0	0	2.50691	1.20607	6.83259	7.4714	8.19857	8.54142	7.27123	6.82749	7.04053	7.60345	7.78638	7.90355	3.74017	2.241	1.24662	0.264008	0.0410193	0.343691	0	0.0271303	0	0	0	0	0	0	0	0.0387671	0.0250025	0.0636152	0	0	0	0	0	0	0.0284019	0	0	0.00447448	0.00911588	0	0.0172771	0	0.00309941	0.00398121
644.05	0	0	0.530012	0.922084	0	5.48142	6.41795	7.0547	7.91391	7.12683	6.27447	6.18021	7.17785	7.57808	7.74297	3.65665	2.20944	1.14715	0.299126	0.251857	0.278287	0.101232	0	0	0	0.33441	0.0423059	0	0.0536418	0	0	0.0470401	0	0	0	0.0375998	0	0	0	0	0	0.0615599	0	0	0	0	0	0	0.00660513
645.07	2.3454	0	4.50333	0	1.9844	5.49671	5.88271	6.80743	8.0759	6.7735	6.32949	5.71541	6.52224	7.50192	7.2224	3.50655	2.0547	1.14189	0.365746	0.247996	0.0709734	0	0	0	0	0	0	0	0	0	0.0320882	0	0	0.0554894	0	0.0928973	0	0	0	0	0.0208422	0.0106704	0	0.0456593	0	0	0	0.0123181	0.00701961
645.94	4.46274	0	0	0	4.55268	6.18238	6.00211	6.51372	7.91413	6.60204	5.98008	5.78567	6.07933	7.56709	7.05128	3.49151	1.96556	1.32609	0.339124	0.219937	0.0556906	0	0	0	0	0	0	0	0	0.0505215	0.0738195	0.00268157	0	0.0841758	0	0.0861454	0	0.0891368	0	0	0.0495608	0.00535211	0	0.0527906	0	0.00246126	0.0260334	0.0300417	0
646.95	0.409085	0	0	4.88456	1.71171	6.52022	6.06603	6.67686	7.61482	6.42862	5.71015	5.35116	5.90145	6.91464	6.83365	3.53438	1.78653	1.22488	0.289558	0.164917	0.150487	0	0	0	0	0	0	0	0	0.0200844	0.107785	0	0.0417485	0.0827356	0	0	0	0.0173625	0	0	0	0	0	0	0	0.00604006	0.03655	0	0
647.97	0	0	1.08315	2.76245	0.59886	4.97402	5.83014	6.64494	7.19049	6.04617	5.36725	5.03166	5.63344	6.52062	6.75783	3.24451	1.64418	1.28601	0.357352	0.19357	0.0269372	0	0	0	0	0	0	0	0	0	0.0549317	0	0.0888662	0.0207393	0	0	0	0	0	0	0	0.0114061	0	0	0	0.00107374	0	0	0.00173195
[truncated: 22 more columns]

## Sheet: 3 days
Wave	200	205	210	215	220	225	230	235	240	245	250	255	260	265	270	275	280	285	290	295	300	305	310	315	320	325	330	335	340	345	350	355	360	365	370	375	380	385	390	395	400	405	410	415	420	425	430	435	440
252.03	0	0	0	0	0	0	0	0	0	0	0	0	0	0.252583	0.320741	0	0	0	0.0948389	0.0953967	0	0	0.0135534	0	0	0.0657305	0	0	0	0	0.130168	0	0.0241316	0.0297946	0	0	0	0	0.0302744	0	0	0.00182744	0	0	0.0307769	0.0133988	0	0	0.0335142
252.96	0	1.62124	0	0	0	0	0	0	0.00166404	0	0	0	0	0.118703	0.260726	0	0	0	0.144363	0.101762	0.023872	0	0	0	0.074489	0	0.0075154	0	0	0	0.0318971	0	0	0.0744673	0	0.0435344	0.0512291	0.04182	0.0471413	0	0.0098466	0.00844195	0	0	0.00803919	0	0.00798042	0.00420947	0.0350617
254.06	2.08608	3.43776	0	0	2.19925	0	0	0	0.138727	0	0	0	0	0.0475303	0.221903	0	0	0.0610064	0.146312	0	0.00516279	0	0	0	0	0	0	0	0.0445936	0	0	0	0	0.0746632	0.0353238	0.05053	0.0179649	0.018743	0.0235897	0	0.00384796	0	0	0.043258	0	0	0.015222	0	0.00138167
255	0	0	1.85882	0	1.00787	0.0533715	0	0	0	0	0	0	0	0	0.0243933	0	0.159232	0	0.0181652	0	0	0	0.0127266	0	0	0	0.012514	0	0.0896932	0	0	0	0.051177	0.0252636	0	0	0	0.0107771	0	0	0	0	0	0.0742349	0	0	0.00313364	0	0
255.93	0	0	0.00528653	0	0	0	0	0	0	0	0	0	0	0	0.101247	0	0.201541	0	0	0	0	0.00219548	0	0.0011775	0	0	0.0529463	0	0	0.0417895	0	0	0.0590079	0	0	0	0.0223249	0	0	0	0	0	0	0	0	0.0162076	0	0.0211266	0.0257581
257.03	0	4.39285	0	0.979894	0	0	0.0438199	0	0	0.0320129	0	0	0	0	0.155613	0	0	0	0	0	0.0296646	0.0444628	0	0	0	0	0.109183	0	0	0	0	0	0	0	0	0	0.0688501	0	0	0.0127843	0	0	0	0	0	0	0	0.0150012	0.0108819
257.96	0	5.93917	0	2.66201	0	0	0.0230399	0	0	0.131875	0	0	0	0	0.177789	0.115001	0	0	0	0.00211387	0.0397079	0.0316164	0.0242165	0.0620072	0	0	0	0	0.0268613	0.0417576	0	0	0	0.0692547	0	0	0.0033464	0	0.0546511	0.0406464	0	0	0.00279464	0	0.000801291	0	0	0.0139561	0
259.06	0	0	0	4.63345	0	0	0	0	0	0.0949125	0	0	0	0	0	0.235557	0	0	0	0.05912	0	0	0	0.133732	0	0	0	0	0.207365	0	0.0186816	0	0	0.0731018	0	0	0	0	0.0480397	0.038587	0	0	0	0.0181449	0	0	0	0.0110626	0
260	5.53494	0	0	7.0256	0.712841	0	0	0	0	0.293867	0	0	0	0	0	0	0	0.0187404	0	0	0	0	0.0486649	0	0	0	0	0	0.0546584	0	0.0494391	0	0.073499	0.046481	0	0	0	0.0540074	0.0296221	0.0337661	0	0	0	0.0217934	0	0	0.0039128	0.031437	0
260.93	4.25355	0	0	4.2503	1.99087	0	0.12878	0	0	0.231341	0	0	0	0	0	0	0	0	0.0144342	0	0.151083	0	0	0	0	0	0	0	0	0	0	0	0.0370602	0	0.0116011	0.0613335	0	0.0180307	0.0492371	0.0518714	0	0	0.0563629	0	0	0	0.0301944	0.0185864	0.0034662
262.03	0	0	0	1.80221	0.426563	0	0.673284	0	0	0.127174	0	0	0	0	0	0	0	0.0426664	0	0	0.0683645	0.0374376	0	0	0	0	0	0	0	0	0	0.0418363	0	0	0	0	0	0	0.0180352	0	0	0	0.0123276	0.000583382	0.0171384	0.0209657	0.0447067	0.0159787	0.00515754
262.96	0	0	0	0	0	0.207895	0.891557	0.346752	0	0.307308	0.650398	0	0	0	0	0	0	0	0	0	0	0.00861872	0	0	0	0	0	0.0114777	0	0	0	0	0	0	0	0	0	0	0	0	0	0	0	0.01372	0.00557969	0.0468236	0	0.00400641	0
264.06	0	0	0	0	0	1.02019	1.28361	1.36537	0	0.573593	1.70357	0	0	0	0	0	0	0	0	0	0	0	0	0	0	0	0	0	0	0	0.0895783	0	0.0417136	0	0	0	0	0	0	0	0	0	0	0.0428896	0	0.0425474	0	0	0
265	0	0	0	0	0	1.98996	2.07456	1.72755	0.328334	1.26606	2.53348	1.26817	0	0	0	0.156356	0	0	0	0	0	0	0.00471046	0.139936	0	0	0.0308326	0	0	0.0636067	0.130266	0.0137345	0.0183049	0	0	0	0	0	0.0713246	0.0125901	0.0424827	0	0	0.0211092	0	0.0340422	0	0	0
265.93	0	0	0	0	1.55058	2.88081	3.50832	3.90446	3.62966	3.59212	4.25538	3.47507	0	0	0	0.453297	0	0	0	0.0447111	0	0	0	0.0852086	0	0.0712534	0.0406182	0	0.0909905	0.0562883	0	0.0816596	0	0	0	0	0	0.0689853	0.112892	0	0.017639	0.0504496	0.000692824	0	0.00613456	0.0277161	0.00109689	0	0
267.03	0	0	3.17069	0	4.21061	4.92608	6.61107	7.98593	9.09962	7.62426	7.81925	8.29498	0	0	0	1.37642	0	0	0	0.0317193	0	0	0	0.0935742	0	0	0	0	0	0.0284733	0.0136689	0	0	0	0	0	0	0.0439734	0.0774615	0	0.0406667	0	0	0	0.0112964	0.00358464	0	0.00088777	0.00758572
267.96	0	0	0	1.46647	3.15251	8.92213	12.2663	16.4369	18.1298	15.544	14.1877	16.5118	14.972	0	0	1.93348	0	0	0.0936334	0	0	0.0763846	0	0.0988205	0	0	0	0	0	0.0482109	0	0	0	0	0	0	0	0.0284264	0.00260039	0	0.0147769	0	0	0.00599715	0	0	0	0.013313	0
269.06	0.0310424	0	0	5.93265	6.37201	15.5727	20.6615	28.0037	30.5336	27.3842	24.2702	27.1638	27.8992	0	0	0.378189	0	0	0.0238179	0	0	0	0	0.100822	0	0	0.0450918	0	0	0.142826	0	0	0	0	0	0	0.0114352	0.00321094	0	0	0.0760934	0	0	0	0	0	0	0.0156446	0
270	3.59282	2.4795	2.23651	11.9721	15.4666	25.1891	29.6943	41.1978	45.8927	42.0319	37.0132	39.0382	41.8927	0	0	0	0.199829	0.0629318	0	0	0.0489103	0	0	0.143132	0	0.115049	0	0	0	0	0	0.00210522	0.0724577	0.0377571	0	0.025087	0.00924105	0.0116864	0.0310932	0	0.0884383	0.0211643	0.059917	0	0	0.0151987	0.00322782	0	0
270.93	8.85632	17.3623	19.8214	11.2771	24.6113	35.1116	42.1686	55.5374	64.0578	58.8037	52.6219	53.9586	58.6857	24.306	0	0	0.577098	0.00258641	0	0.0292777	0.143068	0	0	0	0.00864922	0	0	0.163381	0	0	0.00488819	0	0.100262	0.0133528	0	0.00951915	0	0	0.0356967	0	0.029217	0.0193066	0	0	0.0158082	0.0293504	0	0	0
272.03	21.2362	22.5804	19.8682	21.8397	32.2747	45.5745	55.3396	73.2335	84.9964	77.9847	70.2859	71.1821	77.8271	65.7625	0	0	0.635506	0	0	0	0.15354	0.16354	0	0	0.211585	0	0.0280397	0.165259	0.138422	0	0.100528	0	0.0817175	0	0.0376063	0	0	0	0.0174537	0	0	0	0	0	0.0188667	0.000941321	0	0	0
272.96	22.7665	27.4145	19.8611	29.4142	40.3691	55.4791	68.9841	91.8944	105.709	97.8568	87.5888	89.2734	97.0904	98.367	0	0	0.325468	0	0	0.0245029	0	0	0	0	0.0603338	0	0.190802	0.156385	0.00763899	0.141392	0.07964	0	0.0140884	0.00767694	0.0117624	0	0	0	0	0.00611521	0	0	0	0	0	0	0	0.00955504	0
274.06	26.6057	25.2602	23.8571	35.0594	46.9872	64.585	80.0113	107.74	125.071	115.299	103.022	104.481	113.056	119.241	0	0	0	0	0	0	0	0	0.0561579	0.290118	0.130174	0.00857645	0.216754	0.0955623	0.0013389	0.216515	0.0145305	0.0229227	0	0.0544157	0.00355257	0	0	0.0541148	0.0579664	0	0	0	0	0.00453265	0.00890322	0	0	0.00192386	0
275	33.6847	28.2857	38.4606	36.5267	51.891	72.5666	89.8877	119.594	138.602	130.161	114.593	116.772	126.294	135.766	38.0427	0	0	0.0581512	0	0.0896862	0	0	0.0393556	0.397906	0.390706	0.195196	0.231664	0.0770686	0.117763	0.325824	0.0681154	0.0804726	0.00360871	0.0906383	0	0	0	0.0336014	0.0457225	0	0.0656846	0	0	0	0.0109079	0	0	0	0
275.93	37.3736	35.7306	35.5159	38.7313	51.8055	76.255	97.3469	129.252	149.307	140.403	125.092	126.452	136.577	149.841	81.0256	0	0	0.125762	0	0.0619748	0.00912877	0.164184	0.14299	0.26693	0.441807	0.51598	0.190491	0.0455434	0.239019	0.278198	0.0281713	0.0537819	0.0414489	0.0470337	0	0	0.0601005	0.057186	0.0404394	0.0129959	0.0780065	0	0	0	0	0	0	0.0174667	0.0116702
277.03	40.9672	37.8603	40.861	46.7816	54.1792	81.6995	103.787	138.478	159.256	149.083	134.169	137.255	148.851	161.973	112.981	0	0	0.224697	0	0.0597209	0	0.156	0.224818	0.0944999	0.510376	0.327958	0.187961	0.143889	0.205977	0.237751	0.0851468	0	0.0411488	0.0587957	0	0	0.037932	0	0.00511691	0.0364599	0.0317082	0	0	0	0	0	0.00629985	0.0173585	0.0012093
277.96	40.5697	39.767	40.7314	52.6787	63.7106	88.8847	112.091	148.875	171.393	160.929	145.646	148.075	159.611	172.006	134.324	0	0	0	0	0	0	0.202186	0.259232	0.0335125	0.438912	0.208481	0.127566	0	0.426264	0.312444	0.0615202	0	0.0193686	0.186391	0	0	0	0	0.00730552	0.0565763	0.0694887	0	0	0	0	0	0	0.00684038	0.0256832
279.06	33.9155	38.5723	41.2996	56.0823	68.1165	95.2584	120.299	158.55	182.432	173.152	154.978	155.884	170.029	181.767	148.057	0	0	0	0	0	0.0974735	0.232829	0.135329	0.254277	0.400672	0.0558983	0.186189	0	0.461995	0.367171	0.198142	0	0.0702914	0.221205	0	0.0215727	0	0	0	0.00271484	0	0	0	0.0289184	0.0267636	0.00430404	0	0	0.0269592
280	38.5862	42.9536	42.1763	56.5866	68.1177	101.097	125.371	167.928	190.989	182.231	162.521	161.154	177.05	190.486	155.623	0	0	0	0.027148	0	0.257684	0.0790828	0.17307	0.256703	0.139418	0	0.197501	0.0577705	0.302819	0.235991	0.10162	0.0262036	0.132955	0.249416	0	0	0	0.0699035	0	0	0	0	0	0.0431637	0.00400736	0	0	0.0180744	0.00725987
280.93	40.9439	40.196	50.8185	59.2675	64.8099	105.11	128.061	172.293	196.895	185.301	167.64	165.326	181.872	194.8	161.266	9.89056	0	0	0.0741502	0	0.2672	0.00281192	0.209699	0.214629	0.157338	0	0.307163	0.486622	0.0969304	0.361515	0.0714841	0.059276	0.133948	0.226424	0.016708	0	0.00485059	0.119838	0	0.020539	0	0	0	0	0	0.00297981	0	0.018317	0
282.03	46.8095	32.5178	48.9873	63.4368	65.9895	106.217	131.202	172.787	198.44	186.152	168.553	168.066	180.996	196.283	163.842	32.66	0	0	0.167585	0.0154826	0.0994905	0.260491	0.243953	0.133682	0.0625286	0.0896752	0.101345	0.387174	0.0914874	0.371574	0	0.0249742	0.130358	0.134894	0	0	0.0435691	0.0226064	0	0.0645079	0	0.0257454	0	0	0	0	0.028805	0	0
282.96	46.1549	32.447	48.298	60.3308	66.2065	104.073	131.182	169.004	196.719	184.102	165.929	167.53	178.554	194.389	165.67	45.3425	0	0	0	0	0.0740737	0.225883	0.276461	0.214043	0.193646	0.291297	0.0807307	0.352034	0.213308	0.31871	0.047053	0.0478914	0.141513	0.0509396	0	0	0	0	0	0.0389282	0.000356568	0.00902893	0	0	0	0	0	0	0
284.06	42.4579	46.4347	49.0088	51.9137	71.5221	103.662	128.253	165.984	191.813	181.008	162.416	163.67	175.46	191.017	164.595	51.4419	0	0	0	0	0	0.22062	0.208351	0.00484162	0.281694	0.182899	0.137054	0.240942	0.170195	0.129048	0.0556277	0.211419	0.0897353	0.124428	0	0	0	0	0.041666	0.0578869	0	0	0	0	0	0	0	0	0.0237378
285	35.9527	38.7447	51.5256	55.3471	74.3281	104.258	125.851	161.818	188.629	178.149	160.507	160.698	172.22	189.133	163.711	55.5563	0	0	0	0	0	0.329137	0	0.00347411	0.397082	0.18332	0.148237	0.285684	0.12483	0	0.23516	0.329453	0	0.150672	0	0.0478273	0	0	0.0950981	0.0601047	0	0	0	0	0	0	0	0	0
285.93	33.5076	36.517	40.7565	58.4865	70.0833	106.355	127.021	159.141	187.65	175.31	158.444	159.17	170.423	187.569	164.988	59.2382	0	0	0	0	0	0.22922	0	0	0.0888239	0.511013	0.0815122	0.207657	0.211932	0.003921	0.2507	0.243223	0	0.137846	0	0	0	0	0.0352593	0.00908055	0	0	0	0	0	0	0.0168827	0.0201634	0
287.03	38.232	37.6598	44.6561	53.9259	66.2506	104.573	127.762	158.944	186.442	174.134	156.819	157.489	170.129	184.505	166.892	63.9747	11.0066	0	0	0	0	0	0	0.0182642	0	0.295236	0.102388	0.269253	0.427644	0.246419	0.288074	0.191347	0	0.128407	0.0102522	0	0	0.113349	0	0	0	0	0	0	0	0.0317528	0.0109285	0	0
287.96	36.1953	45.4374	40.9756	41.4379	64.5466	104.393	127.821	159.377	183.245	171.235	155.204	155.885	169.916	181.534	168.355	68.1859	27.3481	0	0	0	0	0	0	0	0	0.0141934	0.44085	0.22692	0.362787	0.37432	0.123385	0.144958	0.0503237	0.139032	0.0271201	0	0.0156828	0.106249	0	0	0	0	0	0	0	0.0254128	0	0	0.0151511
289.06	30.9111	40.5396	43.4692	49.3624	65.4811	105.026	127.076	159.341	178.741	169.028	152.881	154.317	166.641	180.434	169.314	71.929	35.1216	0	0	0	0	0	0	0.128455	0.196781	0	0.334982	0.0781886	0.27377	0.300214	0.208432	0.140819	0.045153	0	0.000156692	0	0.0349258	0	0	0	0.0299428	0	0	0	0	0	0	0	0.0274589
290	17.7477	28.9595	29.9008	52.2174	65.5102	106.362	125.097	154.799	173.92	165.967	150.202	152.284	161.173	176.732	168.65	75.2687	39.5852	0	0	0	0	0	0	0.221451	0.18114	0.265816	0.0640538	0.207447	0.251852	0.175053	0.203282	0.0996535	0.1435	0	0.0692975	0	0.0503622	0	0	0	0.0630324	0	0	0	0	0	0	0	0.00601193
290.93	13.7847	24.4008	33.9635	48.8307	64.6188	102.689	122.488	149.535	168.349	160.418	144.833	147.717	155.746	170.873	165.402	78.6161	43.1288	0	0	0	0	0	0	0.135692	0.118045	0.296347	0	0.428322	0.406947	0.097137	0.348461	0.211577	0.227081	0.0275386	0	0	0	0	0	0	0	0	0	0	0	0	0	0	0
292.03	12.066	28.2578	43.1433	43.6595	64.679	101.179	118.091	144.05	161.595	152.86	139.126	141.847	149.877	164.08	161.318	81.8077	46.0214	4.04229	0	0	0	0	0	0.113047	0.0535335	0.490585	0.200335	0.537906	0.392211	0.1765	0.158165	0.157156	0.212188	0.181953	0	0	0	0.0636571	0	0	0	0	0	0	0	0.0023842	0	0	0
292.96	25.4109	30.2247	46.6151	47.9378	64.1232	99.5509	115.286	137.749	154.142	145.676	133.057	134.682	144.207	157.456	158.033	84.8917	49.3287	15.2939	0	0	0	0.106667	0	0	0.186045	0.342226	0.306817	0.386467	0.189015	0.204611	0.152884	0.153288	0.0342558	0.175226	0	0	0.0493656	0.0763327	0.00636134	0	0.0106524	0	0	0	0	0.018869	0	0	0
294.06	32.303	31.7561	45.1779	46.1709	60.6374	98.5509	111.921	132.693	146.356	140.553	127.134	127.329	138.061	150.222	154.182	86.9507	51.9913	19.3861	0	0	0	0	0	0	0.250979	0.0941687	0.216343	0.305729	0.0600921	0.191514	0.0485483	0.140507	0	0.114854	0	0	0.0132919	0	0.0294679	0.00133631	0.0474937	0	0	0	0	0	0	0.0147996	0
295	28.2066	33.4038	40.9878	41.7973	50.4026	94.3661	109.312	126.985	141.146	133.696	121.692	121.666	132.319	144.279	150.131	88.3248	54.9599	20.7969	0	0	0	0	0	0	0.244644	0	0.196077	0.163719	0.17626	0.140806	0.152808	0.130914	0.017631	0.0565955	0	0	0	0	0	0	0	0	0	0	0	0	0	0.0155258	0
295.93	21.4777	33.757	46.4964	36.0539	45.7113	91.5522	105.911	122.718	136.879	127.974	117.179	116.261	126.246	138.748	146.536	90.5937	56.7879	21.6283	0	0	0	0	0	0	0.0736341	0	0.0161888	0.0576344	0.184341	0.106357	0.0958143	0	0.113829	0.0928084	0	0	0.0166988	0.0307162	0.02145	0	0	0	0	0.00353109	0	0	0	0	0
297.03	12.1366	18.6575	47.4496	35.2754	47.0617	89.4161	101.577	117.814	131.71	121.936	111.398	111.208	119.982	132.994	142.372	92.8186	59.0955	22.775	0	0	0	0	0	0	0.0355513	0	0	0.0803786	0.0868692	0	0.128475	0	0.0329094	0.094385	0	0	0.0532371	0.0861351	0.00112267	0	0	0	0	0.00460792	0	0	0	0	0
297.96	14.6492	30.5057	42.9602	35.2281	50.1045	89.3556	98.7028	114.535	124.551	115.381	105.377	106.467	115.079	126.785	138.507	92.1001	60.6975	23.913	0.533735	0	0	0	0	0	0	0	0	0.150042	0.0958768	0	0	0	0.0211169	0.029852	0	0	0.00387047	0.0157748	0	0.0331044	0	0	0	0.0223035	0	0	0	0	0
299.06	30.1968	32.5348	32.4173	39.1779	45.7365	86.5789	94.8635	107.762	117.013	109.139	101.142	101.705	110.184	122.197	134.843	91.6987	62.6165	24.3179	3.32436	0	0	0	0	0	0	0	0	0.0450664	0.0867441	0	0	0.0805964	0	0.116251	0	0	0	0	0	0.0689086	0.0585139	0	0	0.0389981	0	0	0	0.019868	0
300	22.9528	30.3205	21.9037	38.4736	42.5322	82.3481	92.3767	100.435	111.412	104.59	95.7468	96.9082	105.012	117.382	130.387	91.6269	63.1003	24.6627	4.14902	0	0	0	0	0	0	0	0	0.1916	0.0558921	0	0	0.0585015	0.0319378	0.199109	0	0.0460437	0	0	0	0.0191328	0.0747451	0	0	0	0	0	0	0.0282115	0
301.07	14.052	10.6073	27.5055	34.2115	40.0622	80.2515	87.9975	95.3681	105.533	100.324	90.5352	91.8212	98.3754	111.865	126.116	91.8563	63.2971	25.234	4.45359	0	0	0	0	0	0	0.0276078	0.0980645	0.310865	0.0962629	0.0158162	0.0393592	0.125131	0.0374041	0.182617	0.0734413	0.0550472	0	0	0	0	0.00930412	0	0	0	0	0	0	0.00558723	0
302	6.30945	13.5904	22.8429	29.3404	37.4365	79.3429	87.3352	91.4247	100.374	94.7047	85.4807	87.3543	91.95	105.071	122.278	90.5622	62.6334	25.5572	4.57249	0	0	0	0	0	0	0	0.0931167	0.13114	0.201464	0.0557102	0.0568364	0.105542	0.0809266	0.055653	0	0	0	0	0	0	0	0	0	0	0	0	0	0	0
303.07	20.681	13.6781	21.4908	26.0934	34.6284	75.509	83.9508	87.0535	94.8235	88.4612	81.5306	81.9067	86.6668	98.7125	117.982	89.0598	62.4324	25.3012	4.50089	0	0	0	0	0	0	0	0.0581035	0	0.115883	0.116439	0.231768	0.0497982	0	0.0222824	0	0	0	0	0	0	0	0	0	0.0417696	0	0	0	0	0.0104531
304	13.6107	9.58195	17.4772	19.1444	32.002	70.8085	80.4044	83.0229	88.8082	82.762	75.508	76.7755	81.6437	93.6549	113.539	87.3124	62.1374	25.2765	4.49313	0	0	0	0	0	0.0706202	0	0.141363	0	0.115778	0.149897	0.222585	0	0	0.095654	0.0834003	0	0	0	0	0	0.0452251	0	0	0.0624689	0.0130454	0	0	0.0245129	0.0276119
305.07	16.5889	7.15311	22.9074	20.6581	29.8672	69.8981	75.0565	79.8458	83.2896	78.1823	71.0601	72.4851	77.6021	88.9067	110.447	85.6414	61.7971	24.9323	4.55023	0.305345	0	0	0	0	0	0	0.250363	0	0.233169	0.0434075	0.050861	0	0.110337	0.16764	0.146054	0.0360854	0.0179398	0	0.00903098	0	0.00944438	0	0	0.0938216	0	0.00258577	0	0.031232	0
306	15.272	20.0443	20.7428	25.0926	24.9306	66.0151	72.7164	75.4956	79.1657	73.692	67.3361	68.7381	73.6375	83.8453	106.321	83.6283	60.5944	24.8732	4.87536	0.359014	0	0	0	0	0	0	0.366331	0.100872	0.33106	0	0.0303711	0.082372	0.0994318	0.0916122	0.144126	0.0714267	0.0456719	0	0	0	0	0	0	0	0.00216925	0.013383	0	0.00201681	0.0159228
307.07	10.2024	18.0674	13.6743	20.9087	24.9003	61.3301	69.8346	70.2677	75.3279	70.6252	64.5974	65.8949	70.8924	79.2233	101.634	80.9194	58.7944	24.5381	4.97272	0.267821	0	0	0	0	0	0	0.351624	0	0.0783915	0	0.0667153	0.0723737	0.00553019	0	0	0.0996476	0.040057	0	0	0	0	0	0	0	0.00327707	0.0127351	0	0	0.0211594
308	5.14445	16.3665	22.6316	21.9744	27.2866	57.9714	65.728	66.2789	71.4842	67.563	61.3331	62.2935	67.6814	75.0749	96.9297	79.2065	56.9879	24.0882	4.91244	0.298127	0	0	0	0	0	0	0	0	0	0	0.212207	0.0406476	0	0	0.114287	0	0.0354852	0.00460766	0	0	0	0	0	0	0.00682716	0	0	0	0.0180794
309.07	6.49967	13.7848	22.1054	26.9828	24.8215	57.5104	62.5797	62.7199	68.0529	64.6763	57.7408	58.3973	63.6128	71.6948	93.7891	77.1473	55.1669	23.6725	4.5226	0.540213	0	0	0	0	0	0	0	0	0	0	0.177132	0.0408405	0	0.00648814	0.0582335	0	0.0807191	0.00735527	0	0	0	0.0384534	0	0	0.0264835	0	0	0	0.0172323
310	1.49516	23.4806	23.1542	24.5917	20.6764	52.849	60.3762	60.2612	65.1035	60.7869	54.6612	55.0942	59.0586	69.0263	90.0166	75.8755	54.0165	23.0891	4.26842	0.509894	0	0	0	0	0	0	0	0.148645	0.113073	0	0	0.0634873	0	0.0418356	0.0748542	0.00263808	0.0750465	0	0	0.0526075	0	0	0	0.0688255	0	0	0	0	0.00431287
310.93	2.32596	6.81625	16.4415	16.6076	19.0186	49.8109	58.9062	57.3772	61.1052	58.1477	52.3869	53.4694	55.877	66.314	85.9614	73.1369	52.4643	22.2892	4.30718	0.568538	0	0	0	0	0	0	0	0.223745	0.190813	0	0	0.0737525	0	0.045101	0	0	0	0	0	0	0	0	0	0.0938226	0	0	0	0	0
312.03	18.374	9.4974	13.373	18.7347	20.6404	49.1888	55.6661	56.3641	58.1287	55.0659	50.2069	50.6965	53.4881	62.4543	82.5117	70.0977	50.887	21.4249	4.36417	0.682757	0	0	0	0	0	0	0	0.270997	0.172838	0	0.0473602	0	0.00778594	0	0	0	0	0.00435144	0	0	0	0	0	0.0498124	0	0	0	0	0
312.96	18.7462	9.81708	11.0475	16.2717	22.175	49.2479	53.4679	53.2245	54.5625	52.0921	47.3985	47.6619	50.5378	58.7881	78.5158	66.6342	49.1739	20.7055	4.28308	0.674785	0	0	0	0	0	0	0	0.116255	0.0420438	0.0683964	0.147109	0.00315083	0.052735	0	0.022424	0	0	0	0	0	0	0	0	0	0	0	0	0	0.00964279
314.06	10.543	12.553	13.7705	16.1553	22.1124	46.3766	51.5092	49.7567	50.8888	48.9315	44.246	45.0616	48.2611	55.6624	75.2773	64.4909	47.603	19.4474	4.31894	0.713	0.124447	0	0	0	0	0	0	0.0425448	0	0.0352374	0	0	0.0114878	0	0.0613971	0	0.0862456	0.0241603	0	0	0	0	0	0	0	0	0	0	0.0149008
315	0.81097	3.86127	12.5235	14.6103	23.3698	43.707	48.949	45.6162	48.1355	46.1988	42.2888	43.0702	46.2556	53.3645	70.8015	62.2761	46.5575	18.4368	4.16536	0.811675	0.220358	0	0	0	0	0	0	0	0	0.0452786	0	0	0	0	0.0148048	0	0	0	0	0.0159766	0	0	0	0.014158	0	0	0	0	0.0191739
315.93	6.57204	7.26283	13.1857	18.2128	24.0046	41.7497	46.7098	43.6086	45.9303	44.243	40.2825	40.9184	44.0485	50.884	68.4982	60.4579	44.8805	17.4724	4.00348	1.01193	0.201772	0	0	0	0	0	0	0.109483	0.0108912	0	0	0	0	0.0292908	0.00701019	0	0	0	0	0	0	0	0	0	0	0	0.00104217	0	0
317.03	5.22965	10.2821	12.1097	15.5782	23.3965	41.0847	45.5673	42.5387	44.2059	42.305	38.6579	38.6357	41.2547	48.719	64.7843	58.7557	43.0681	17.2174	3.85255	0.925228	0.225111	0.0420175	0	0	0	0	0	0	0.083547	0	0	0	0	0.0757368	0	0	0	0	0	0	0	0	0	0	0	0	0.00287192	0	0
317.96	7.88688	10.9015	13.1033	14.0012	19.3895	39.1457	43.0718	40.7508	41.5482	39.9902	36.4684	36.8342	38.7075	45.8869	62.0856	55.8178	40.7403	16.496	3.59378	1.04382	0.240042	0.0588058	0	0	0	0	0	0	0.118116	0	0.0138151	0	0	0	0	0	0	0	0.0213984	0	0	0	0	0	0	0	0.011899	0.00482853	0
319.06	9.42755	12.5957	14.1599	15.165	20.183	36.7119	39.932	38.9933	40.9142	37.8161	34.1892	35.2133	36.9827	43.7937	58.4417	52.9357	39.5135	15.9714	3.09992	0.975327	0.235956	0	0	0	0	0	0	0	0	0	0	0	0	0	0	0.0762877	0	0.04644	0.0441309	0	0	0	0	0	0	5.70883e-07	0	0	0
320	13.5527	16.3078	9.90742	14.9248	17.8591	33.5114	37.4106	38.2199	39.1505	35.9977	32.1015	33.6947	35.415	41.2021	56.2412	50.6679	37.997	15.2702	2.71073	0.970813	0.213945	0	0	0	0	0	0	0	0	0	0	0	0	0	0	0.0143801	0.0628252	0	0.0106691	0	0	0	0	0	0	0	0.000558488	0	0
320.93	20.3672	1.17211	5.36142	11.7425	12.2206	32.3365	36.7852	36.8954	37.1276	34.1126	30.5106	31.9495	34.0329	39.1189	53.455	48.1832	36.0041	14.944	2.70479	1.06015	0.261193	0	0	0	0	0	0	0	0	0	0	0.0120365	0.140286	0	0	0	0.017632	0	0	0	0	0	0	0	0	0	0	0	0.0287238
322.03	13.5531	0	5.82136	12.0783	9.28017	30.8524	34.7178	33.6947	34.4288	32.5437	29.2298	30.7454	32.0779	36.6201	50.8681	46.0227	33.7758	14.3165	2.67757	1.12685	0.426804	0.0652082	0	0	0	0	0	0	0	0	0	0	0.0597999	0.0404465	0	0	0	0	0	0	0	0	0	0	0	0	0	0.0082813	0
322.96	8.53783	2.4483	7.47611	16.0379	9.09536	30.0331	32.6456	30.2787	33.5703	30.7399	27.8362	28.8454	30.8156	34.8079	48.3779	44.1603	32.1081	13.9359	2.80576	1.05387	0.57217	0.0844384	0	0	0	0	0	0	0	0	0	0	0	0	0	0	0	0	0	0	0	0	0	0	0.0290348	0.00757067	0	0.0197482	0
324.06	4.26269	14.1908	11.4009	14.339	11.237	28.0055	30.4649	29.206	31.4115	28.9956	26.3332	27.0191	29.1025	33.1947	46.4988	41.9335	30.6001	13.7009	2.62276	0.914683	0.657722	0.188144	0	0	0	0	0	0	0	0	0	0	0	0	0	0	0	0	0	0	0.0223159	0	0	0	0	0.0136041	0	0.0150887	0
325	0.280868	14.2891	15.99	11.6925	12.7641	26.7017	29.294	27.7496	29.5003	27.0649	24.7529	24.9421	27.4219	31.3546	43.7937	39.476	29.2691	13.3746	2.57251	0.821973	0.709366	0.20146	0	0	0	0	0	0	0	0	0	0.0355148	0.00337645	0	0	0	0	0	0	0	0.0198761	0	0	0	0	0.0047717	0	0	0
325.93	0.225304	9.40233	2.96855	10.8493	11.9241	25.111	28.0056	26.76	28.0947	25.9183	23.8532	23.6409	25.5129	29.8788	41.5486	37.445	27.8189	12.714	2.75611	0.656748	0.860205	0.28112	0	0	0	0	0	0	0	0	0	0	0	0.0179661	0	0	0.000339515	0	0	0	0	0	0	0	0	0	0	0	0
327.03	0.436495	2.4056	0	9.88082	9.13522	23.367	26.6007	24.6524	27.1636	24.9256	22.8837	22.2682	24.6696	28.1263	39.7199	35.2311	26.5321	11.89	3.36324	0.731468	0.820891	0.305288	0	0	0	0	0	0	0	0	0	0	0	0.0746633	0.0398615	0	0.0473583	0.0200281	0	0	0	0	0	0.0182552	0	0	0	0	0
327.96	0	0	0	3.09686	8.90573	20.8	25.0071	23.5095	25.694	23.87	21.8048	21.2746	23.5802	26.354	37.6622	32.9367	25.2381	11.1461	3.47298	0.744809	0.787947	0.533347	0.0968214	0	0	0	0	0	0	0	0	0	0	0	0.115023	0.00200175	0.0866859	0.0283899	0.0125098	0	0	0	0	0	0	0	0.0088394	0	0
329.06	0.317621	0	4.61077	5.64655	10.2163	19.0827	24.5598	21.5115	24.3126	22.5232	20.4621	19.9675	22.4048	25.0522	35.3528	31.794	24.3038	10.9288	3.25918	0.796446	0.579202	0.626616	0.279646	0	0	0	0	0	0	0	0	0	0	0	0.0417443	0.0455514	0	0	0	0	0	0	0	0	0	0	0.00141168	0	0
330	3.64468	1.85201	3.875	6.68135	11.913	19.9998	23.5524	20.9754	22.7139	21.3003	19.4371	19.1842	20.9325	24.2752	33.4517	30.5629	22.8674	10.9623	3.16336	0.899337	0.632503	0.799405	0.303513	0	0	0	0	0	0	0	0	0	0.0127353	0	0	0.0322684	0	0	0	0	0	0	0	0	0	0.00121193	0	0	0
331.07	6.74001	0	7.70762	5.38893	11.5942	19.5791	22.3484	19.8483	21.0223	20.3859	18.379	18.1211	20.0775	23.2848	32.1759	29.1884	21.4664	10.5052	3.59695	1.18712	0.769267	0.965372	0.494261	0	0	0	0	0	0	0	0	0	0	0.0106187	0	0	0	0	0	0	0	0	0	0	0	0	0	0	0
332	0	0	7.12038	0.583708	9.68009	17.3232	20.1209	19.6918	19.6388	19.1791	17.4054	17.5167	19.1074	21.5972	30.3396	27.4139	20.6421	10.0288	3.8759	1.30192	0.792586	1.07414	0.512503	0	0	0	0	0	0	0	0	0	0	0	0	0	0	0	0	0	0	0	0	0	0	0	0	0	0
333.07	0.87067	3.16322	8.18428	0	8.86663	13.8865	18.842	19.5501	18.7417	18.1331	16.4724	16.302	18.4921	20.631	28.6816	26.0772	20.217	9.63642	4.00123	1.59241	0.53303	1.01594	0.545142	0	0	0	0	0	0	0	0	0	0	0	0	0	0	0	0	0	0	0	0	0	0	0	0	0	0
334	0	4.36233	5.82749	4.59839	1.84275	12.9285	17.2814	18.5454	17.7215	17.1199	15.5591	15.4356	17.5512	19.7269	26.7948	24.6846	19.0729	9.42837	4.0573	1.85154	0.574582	1.02143	0.438878	0	0	0	0	0	0	0	0	0	0	0	0.0176321	0	0	0	0	0	0	0	0	0	0	0	0	0	0
335.07	0.821133	0	1.2565	8.17382	0	12.7709	16.7675	16.6492	17.1137	16.2787	14.5453	14.1907	16.5906	18.7486	25.4733	23.32	17.593	9.06679	3.97669	2.20004	0.803208	1.05778	0.616567	0.321452	0	0	0	0	0	0	0	0	0	0	0	0	0	0	0	0	0	0	0	0	0	0	0	0	0
336	5.85507	0	0	7.21246	0	12.0057	15.6565	15.2617	16.5282	15.2698	13.7642	13.6173	15.1698	17.0967	24.5572	22.661	16.8193	8.89386	3.97496	2.34482	1.0431	1.0582	1.07527	0.63871	0	0	0	0	0	0	0	0	0	0	0	0	0.0614706	0	0	0.00571729	0	0	0	0	0	0	0	0	0.019466
337.07	0	5.60802	0.798294	5.33763	0.834902	11.4143	14.9687	14.9168	15.7727	14.3969	13.1171	13.056	14.6019	15.9809	23.6783	21.5253	16.4737	8.79369	4.0233	2.6658	1.41739	1.13563	1.16663	0.862079	0.138809	0	0	0	0	0	0	0	0	0	0	0	0.0748853	0	0	0	0	0	0	0	0	0	0	0	0.0225396
338	0	0	5.42113	6.88573	2.02269	11.3417	13.7953	14.1577	14.3222	14.1805	12.3124	12.5269	13.7634	15.1751	22.8865	20.8052	16.1856	8.75873	4.25319	2.79805	1.9885	1.13073	1.09139	0.860002	0.423753	0	0	0	0	0	0	0	0	0	0	0	0.0741222	0	0	0	0	0	0	0	0	0	0	0	0.00198393
339.07	0.10448	0	8.61073	2.3018	6.69978	11.9126	13.0045	13.1638	13.5806	13.5515	11.6381	12.0495	13.0601	14.6528	21.6412	19.6038	15.7899	8.68332	4.32088	3.06858	2.15885	1.19555	1.22308	0.875284	0.599556	0.344515	0	0	0	0	0	0	0	0	0	0	0	0	0	0	0	0	0	0.0053525	0	0	0	0	0
340	6.8393	0	4.0697	2.32911	9.03886	10.2495	12.3662	12.8818	13.3302	12.5849	11.2325	11.8637	12.3749	14.0689	20.4656	19.3515	15.3145	8.74184	4.53939	3.27906	2.20524	1.24376	1.60328	0.98764	0.697023	0.375359	0	0	0	0	0	0	0	0	0	0	0	0	0	0	0	0	0	0.0099067	0	0	0	0	0
340.93	4.63717	0	5.43714	0.117203	8.93901	9.26397	12.8865	12.766	12.6013	11.6536	10.4806	11.6396	11.8024	13.4268	18.9639	18.667	14.8603	8.6531	4.73363	3.45544	2.32493	1.31119	1.6371	1.20717	0.738565	0.27668	0	0	0	0	0	0	0	0	0	0	0	0	0	0	0	0	0	0	0	0	0	0	0
342.03	4.45341	0	0	1.85135	4.53727	8.51884	11.9916	12.3292	11.9781	11.2755	9.31667	10.2517	11.1776	12.8553	18.0499	18.006	14.4366	8.61875	4.97799	3.56932	2.84568	1.32708	1.60772	1.55051	0.997388	0.202725	0	0	0	0	0	0	0	0	0	0	0	0	0.0203538	0	0	0	0	0	0.0100175	0	0	0	0
342.96	0	0	0	1.39428	2.72538	9.00236	10.4592	11.1335	11.8454	10.3121	8.73728	9.28547	10.5896	12.0553	17.7917	16.9083	13.9569	8.58503	5.18632	3.71411	3.26512	1.49813	1.62157	1.83299	1.31566	0.389124	0	0	0	0	0	0	0	0	0	0	0	0	0	0	0	0	0	0	0	0	0.00829416	0.00244643	0.00166501
344.06	0	0	0	5.1691	4.33277	8.7371	9.42017	10.3555	11.6247	9.62444	8.9336	9.05003	10.3391	11.5703	17.539	16.4162	13.6917	8.75582	5.30252	4.02686	3.52565	2.08789	1.72757	1.88147	1.29309	0.848054	0	0	0	0	0	0	0	0	0	0	0	0	0	0	0	0	0	0.00260885	0	0	0	0.00543965	0
345	0	0.463215	10.3789	0	4.24223	8.8636	9.92307	9.96891	10.7096	9.19929	8.93103	8.8719	9.67034	11.2411	16.8893	15.8345	13.6938	8.56188	5.59066	4.23267	3.564	2.66778	1.76484	1.87761	1.31828	1.02448	0.0940859	0	0	0	0	0	0	0	0	0	0	0	0	0	0	0	0	0	0	0.00917255	0	0	0
345.93	0	0	2.66288	0	1.42092	8.18449	9.95051	9.97081	9.23697	9.05677	8.32617	8.09387	8.92554	10.8714	15.4115	15.4821	13.6653	8.37703	5.75748	4.65244	3.62796	3.02681	1.84099	2.06818	1.81473	1.17839	0.365954	0	0	0	0	0	0	0	0	0	0	0	0	0	0	0	0	0	0	0	0	0	0
347.03	0	0	2.5718	0	0.769822	7.51934	9.64495	9.79759	8.37208	8.40174	7.67889	7.65718	8.54461	9.94133	14.999	15.3197	13.4404	8.65094	5.91599	4.78971	3.93669	3.2211	1.9184	2.04264	2.24202	1.28009	0.555367	0	0	0	0	0	0	0	0	0	0	0	0	0	0	0	0	0	0	0	0	0	0
347.96	0.551856	0	0	2.25203	0.0560061	6.46786	8.96898	9.34339	7.97488	8.08707	7.32531	7.27409	8.08022	9.50685	15.0178	15.531	13.3151	8.77511	5.97001	5.12338	4.32138	3.76206	2.20408	2.05558	2.15434	1.41185	0.560831	0	0	0	0	0	0	0	0	0	0	0.00469185	0	0	0	0	0	0	0	0	0	0	0
349.06	3.96991	3.83556	1.32863	0.639541	0.819528	5.55253	8.19335	8.58675	8.53815	7.9651	6.78794	6.76784	7.75642	9.41619	14.8297	14.7499	12.8943	8.97379	6.34034	5.48302	4.71462	3.93856	2.59139	2.28885	2.04019	1.58845	0.838789	0.200724	0	0	0	0	0	0	0	0	0	0	0	0	0	0	0	0	0	0	0	0	0
350	2.9235	1.70058	0	0	3.92592	5.76768	7.98094	8.16576	8.33244	7.73447	6.18051	6.27909	7.21697	9.08849	13.9346	14.3471	12.5018	9.13085	6.71232	5.79706	4.95836	4.28032	2.99978	2.68972	2.23098	2.10288	1.46354	0.508705	0	0	0	0	0	0	0	0	0	0	0	0	0	0	0	0	0	0	0	0	0
351.07	0	0	0	0	2.26102	6.72339	8.26021	8.03276	8.61267	6.94853	5.85397	6.03978	6.87337	8.5599	13.6593	14.1848	12.2376	9.335	6.91297	5.98119	5.36108	4.57543	3.65502	2.94833	2.78163	2.36518	1.81491	0.890528	0	0	0	0	0	0	0	0	0	0	0	0	0	0	0	0	0	0	0	0	0.00451665
352	0	0	0	0	0	5.76705	8.36948	8.06274	7.82854	6.30216	5.53962	5.81357	6.3748	8.0471	13.5541	14.2669	12.3158	9.3805	7.03163	6.40437	5.75195	5.2445	4.33616	3.2235	3.55138	2.51951	1.82733	1.19247	0.140251	0	0	0	0	0	0	0	0	0	0	0	0	0	0	0	0	0	0.0211691	0	0.017569
353.07	0	4.36791	4.11112	0	0	5.23578	7.82949	8.15978	6.89877	6.11074	5.18724	5.70962	5.98466	7.49561	13.5821	14.0651	12.395	9.95056	7.23691	6.79879	6.05171	5.59549	4.98987	3.57031	3.9803	2.94449	2.02397	1.40656	0.118746	0	0	0	0	0	0	0	0	0	0	0	0	0	0	0	0	0	0	0	0.00713255
354	0	6.63953	5.42218	0	0	5.65209	7.49677	7.53434	6.38141	5.98525	5.19504	5.21852	5.49061	6.91302	13.171	14.2738	12.8137	9.99735	7.80336	6.93978	6.30436	6.10071	5.43385	3.83983	4.28768	3.51088	2.72958	2.03551	0.49194	0	0	0	0	0	0	0	0	0	0	0	0	0	0	0.00819263	0	0	0	0	0
355.07	0	0	0	0	0.345219	5.20356	7.23853	6.69427	6.90855	5.95348	5.11327	4.38608	5.317	6.98955	12.6641	14.3012	12.7907	9.97675	8.16801	7.38645	6.61887	6.22253	5.82785	4.14891	4.41047	4.03965	3.06369	2.22229	0.734036	0	0	0	0	0	0	0	0	0	0	0	0	0	0	0.0365551	0	0.0117864	0	0	0
356	0	0	0	0.500096	1.90531	5.00928	7.05919	6.45139	7.11408	5.46983	4.70596	4.34622	5.0865	6.6575	12.2961	14.18	12.59	10.1117	8.45498	7.71714	6.83118	6.58367	6.28243	4.36676	4.5512	4.19789	3.10101	2.51169	1.24948	0.210492	0	0	0	0	0	0	0	0	0	0	0	0	0	0	0	0	0	0	0
357.07	0	0	0	0	3.19677	5.15937	7.08255	6.47582	6.78217	5.05025	3.99988	4.44913	4.91461	6.45053	12.1566	14.0459	12.3792	10.6991	8.5533	8.1616	7.16319	7.12718	6.56013	5.15792	4.50612	4.42047	3.31744	2.7575	1.71694	0.500776	0	0	0	0	0	0	0	0	0	0	0	0	0	0	0	0	0	0	0
358	0	0.58019	0	0	0	6.66404	7.56332	5.91095	6.58643	4.86348	4.11586	4.50557	4.77363	5.76489	11.6701	13.9015	12.8024	10.7843	8.79223	8.40629	7.54722	7.3367	6.88856	6.18648	4.97516	4.6694	3.9558	3.23066	2.07662	0.675696	0	0	0	0	0	0	0	0	0	0	0	0	0	0	0	0	0	0	0
359.07	0	10.4966	0	0.246319	0	6.1555	6.94887	6.58037	5.60989	4.64472	4.32005	3.90065	4.56838	5.58985	11.4815	13.8655	13.1977	10.851	9.16939	8.90898	7.91356	7.49081	7.23639	6.73382	5.19909	5.23024	4.68408	3.45355	2.40504	0.951171	0	0	0	0	0	0	0	0	0	0	0	0	0	0	0	0	0	0	0
360	5.67571	4.41864	0	2.19483	0	6.939	6.15451	6.87084	5.51563	4.21636	4.23181	3.95113	4.30826	5.26709	11.4226	13.9311	13.3884	10.9243	9.64611	9.14336	8.14005	7.94609	7.58073	6.65665	5.55659	5.60128	5.09527	3.58103	2.37422	1.22452	0	0	0	0	0	0	0	0	0	0	0	0	0	0	0	0	0	0	0
361.07	6.91271	0	0.505484	4.19486	1.73312	5.70518	6.69809	7.41857	5.59729	4.1635	3.64609	3.92366	4.13923	5.343	11.3563	13.8695	13.0144	10.9176	9.90614	9.51835	8.51235	8.7395	7.88009	7.1889	6.44552	6.22928	5.4412	4.00895	2.81616	1.50088	0.115935	0	0	0	0	0	0	0	0	0	0	0	0	0	0	0	0	0	0
362	0	0	0	3.145	2.63755	5.52808	7.06027	5.87391	5.74873	4.13252	3.35771	3.92042	3.93473	5.1286	11.2881	14.1125	13.0699	11.4223	10.0531	9.80973	9.0368	9.175	8.29773	8.03704	7.45678	6.58489	5.88149	4.51374	3.06418	2.04209	0.524063	0	0	0	0	0	0	0	0	0	0	0	0	0	0	0	0	0	0
363.07	0	0	0	0	0.0190431	5.1904	6.2775	5.78418	4.75917	3.87924	3.11827	3.45788	3.55777	4.87603	11.3655	14.5207	13.1858	11.8926	10.4089	10.0917	9.75582	9.56825	9.04147	8.62203	7.96151	6.96577	6.66679	5.44325	3.84799	2.4655	0.611251	0	0	0	0	0	0	0	0	0	0	0	0	0	0	0	0	0	0
364	2.24156	0	0	0	1.59265	3.91579	6.21318	5.59574	4.50353	3.53015	3.1344	3.13225	3.44391	4.89183	11.406	14.5789	13.5508	12.297	10.7035	10.4491	10.0526	9.86692	9.62809	8.85345	8.14449	7.41773	7.18209	6.30714	3.9018	2.65241	0.71449	0	0	0	0	0	0	0	0	0	0	0	0	0	0	0	0	0	0
365.07	9.89313	0	2.3074	0	1.08887	2.90226	7.23782	6.49035	4.89482	3.70656	2.93215	2.91631	3.41784	4.644	11.4221	14.589	13.8258	12.0814	10.9949	10.7869	10.1144	10.2497	10.2516	9.55986	9.0199	8.2659	7.60673	6.73241	4.22274	2.79214	0.750361	0	0	0	0	0	0	0	0	0	0	0	0	0	0	0	0	0	0
366	0.279349	3.31158	0.671897	0	1.26779	4.4946	6.98915	6.38548	4.98697	3.80732	2.94877	2.57133	3.09249	4.91272	11.3553	15.0428	14.2733	12.4668	11.1014	10.956	10.1674	10.7336	10.663	10.4212	9.59831	8.80211	8.43138	6.74642	4.66387	3.12415	1.08733	0.162646	0	0	0	0	0	0	0	0	0	0	0	0	0	0	0	0	0
367.07	0	0	4.59185	0	0.143563	6.56042	6.68932	6.15753	4.59853	3.41442	2.81606	2.57528	2.686	4.54103	10.9719	15.4277	14.5861	13.1277	11.5575	11.3414	10.3979	11.3106	11.0961	11.0138	10.3856	8.89306	8.71653	7.12938	5.4028	3.59232	1.44416	0.333199	0	0	0	0	0	0	0	0	0	0	0	0	0	0	0	0.0140958	0
368	0	0	0	0	0	6.06163	7.27767	6.29913	4.42075	2.81448	2.64038	2.30597	2.71718	4.40858	10.6971	15.4758	14.4072	13.352	11.7178	11.8563	10.9309	11.7847	11.4259	11.5587	11.0792	9.13377	8.78925	7.70125	6.11998	3.99313	1.95626	0.424984	0	0	0	0	0	0	0	0	0	0	0	0	0	0	0	0	0
369.07	0	0	0	1.23731	0	5.67894	8.07821	6.75444	4.58975	2.84311	2.4024	2.26054	2.67288	4.26609	10.5589	15.4881	14.3644	13.1813	12.0428	12.2298	11.4483	12.2229	11.9141	11.7831	11.9666	10.2704	8.97064	8.55095	6.46057	4.25329	2.48801	0.476969	0	0	0	0	0	0	0	0	0	0	0	0	0	0	0	0	0
370	3.0274	0	0	3.97565	1.04929	5.15034	7.65864	6.82587	4.1674	2.94165	2.37239	2.06139	2.59263	4.45122	11.012	15.6482	14.529	13.1267	11.9062	12.1868	11.7981	12.8031	12.6414	12.2505	12.4601	11.6271	10.059	9.05525	6.7215	4.71736	3.00259	0.762857	0	0	0	0	0	0	0	0	0	0	0	0	0	0	0	0	0
371.07	0	0	0.67031	0	3.83304	4.45937	7.68044	6.44886	3.97019	2.97137	2.43507	2.36187	2.46803	3.88682	11.1874	15.7879	15.0416	13.4126	12.3846	12.5687	12.009	13.0646	13.0772	12.5371	12.9916	12.6514	10.7394	9.57869	6.97995	5.07368	3.08845	0.924147	0.0397287	0	0	0	0	0	0	0	0	0	0	0	0	0	0	0	0
372	1.91139	0	0.659912	0	1.05205	5.06452	8.71086	5.65078	4.38656	2.91409	2.30232	2.34818	2.44739	3.6863	11.0456	15.9441	15.2767	13.4244	12.8302	13.0392	12.4042	13.126	13.24	12.9005	13.3926	13.3587	11.2354	9.73114	7.44743	5.54843	3.08933	1.13979	0.204438	0	0	0	0	0	0	0	0	0	0	0	0	0	0	0	0
373.07	0	0	0	0	0	6.48885	9.84403	6.14759	4.40648	3.0934	2.10906	2.04858	2.43566	3.92229	10.5014	16.1597	15.3493	13.8818	13.2066	13.1651	12.7171	12.9391	13.7195	13.4427	13.672	13.9589	11.3764	10.231	8.07501	5.92074	3.21466	1.26556	0.292931	0	0	0	0	0	0	0	0	0	0	0	0	0	0.000532369	0	0
374	0	0	0	2.16312	0	7.03171	9.33532	6.04334	3.96876	2.49562	1.83922	2.01907	2.35748	3.88863	10.8405	16.1191	15.7714	14.3564	13.3099	12.9825	12.708	13.1909	14.4887	14.1816	13.9728	13.9429	12.0371	10.8981	8.89721	6.33098	3.47524	1.71103	0.509432	0	0	0	0	0	0	0	0	0	0	0	0	0	0	0	0
375.07	0	0	0	4.717	0.913267	6.1255	7.90089	7.56382	3.43826	2.41372	1.77895	1.74958	2.16848	3.60098	11.0684	16.2398	16.0614	14.6078	13.5645	13.4899	13.0932	13.7998	15.0886	14.91	15.0116	14.3467	12.7154	11.4322	9.50029	6.38743	3.89287	2.12422	0.613318	0	0	0	0	0	0	0	0	0	0	0	0	0	0	0	0
376	0	5.47871	0	3.69164	0	5.80473	8.55385	8.05914	3.86437	2.47282	1.95415	1.68891	1.89793	3.53852	11.7099	16.2172	15.7209	14.5341	13.7744	14.0002	13.7232	14.8766	15.3034	15.1345	15.6745	15.2684	13.3736	11.5678	9.86153	6.76283	4.3546	2.38061	0.799259	0	0	0	0	0	0	0	0	0	0	0	0	0	0	0	0
377.07	0	7.5058	0	0	2.17013	5.01241	9.93632	8.20258	3.77996	2.3737	1.91768	1.46143	1.73385	3.39054	11.5342	16.655	15.3199	14.5295	13.725	14.2929	14.3052	15.2493	15.4345	15.8218	16.3055	16.3815	13.932	12.035	9.86926	7.47516	4.7972	2.44499	0.938679	0.164034	0	0	0	0	0	0	0	0	0	0	0	0	0	0	0
378	0	8.50382	2.90252	0	0.171375	5.46661	10.8388	7.12505	3.56059	2.11921	1.61713	1.4815	1.95038	3.28356	11.3378	16.7459	15.7717	14.7238	14.0642	14.4308	14.3926	15.0691	15.8574	16.47	16.6236	16.5971	14.8702	12.8883	10.2085	8.19589	4.88274	2.53004	1.24165	0.276897	0	0	0	0	0	0	0	0	0	0	0	0	0	0	0
379.07	10.5488	1.83269	3.03823	0	1.61386	5.79788	10.0989	6.98648	3.53109	2.22812	1.25891	1.34386	2.06287	2.96089	11.0983	16.9567	16.4767	14.6013	14.0599	14.8663	14.5963	15.1715	16.2896	16.9166	17.3399	16.7281	15.957	13.4767	10.7319	8.48749	5.22019	2.85684	1.47735	0.435018	0	0	0	0	0	0	0	0	0	0	0	0	0	0	0
380	4.41132	0	5.012	0.487174	0	5.70622	9.36186	7.05195	3.95544	2.2606	1.38982	1.67606	2.01831	3.15073	11.3833	16.8125	16.5009	14.8331	14.1033	14.8835	14.8431	15.7158	16.6787	16.7643	17.2981	17.1632	16.1692	13.4989	11.4107	8.68747	5.53948	3.18033	1.85145	0.514107	0	0	0	0	0	0	0	0	0	0	0	0	0	0	0
381.07	1.31309	0	0.35534	7.76862	0	6.30799	9.24705	6.8987	4.11963	1.92683	1.70085	1.43517	1.68474	3.19485	11.537	17.3451	15.7901	15.0479	14.3646	15.2222	14.9839	16.051	16.9651	16.7931	17.8888	17.8748	16.5385	14.0457	11.8253	8.9314	6.16254	3.47603	1.9061	0.74472	0	0	0	0	0	0	0	0	0	0	0	0	0	0	0
382	0	0	2.8511	2.5956	0.939457	7.95436	9.39701	6.73179	3.50553	1.90356	1.63131	1.13073	1.6207	3.28216	11.6303	17.4616	16.0147	15.3668	14.9927	15.7337	15.0805	16.3957	17.705	17.0855	18.3417	18.4105	17.0257	14.7592	11.8377	9.27445	6.61951	3.45841	1.94986	1.02946	0	0	0	0	0	0	0	0	0	0	0	0	0	0	0
383.07	0	0	0	0	1.21657	9.15939	9.83966	7.01922	3.67911	2.08464	1.43573	0.752081	1.78138	3.01618	11.4037	17.4057	16.6695	15.5151	14.8206	15.9212	15.5254	17.0007	18.125	17.548	18.6208	19.0104	17.5326	15.4179	12.2153	9.35491	6.88094	3.86069	1.99093	1.08839	0	0	0	0	0	0	0	0	0	0	0	0	0	0	0
384	0.35515	0	0	0	1.16514	8.45173	10.1606	8.39033	3.92857	2.00882	1.24761	1.0288	1.81818	3.31819	11.3791	17.2295	17.5742	15.8582	15.0409	15.5765	15.8964	17.0903	17.9382	17.9905	18.7659	19.385	17.6528	16.0393	12.2988	9.60382	7.01735	4.28369	2.3789	1.21739	0.23773	0	0	0	0	0	0	0	0	0	0	0	0	0	0
385.07	5.46463	0	0	0	0	7.24958	11.3471	8.3252	4.83824	2.09632	1.55319	0.72535	1.70033	3.41257	11.2116	17.3873	17.4812	15.8767	14.9488	15.4969	16.2974	17.1493	18.1942	18.2547	19.5224	19.6774	18.3762	16.5808	12.8639	10.2466	7.15581	4.91444	2.74656	1.3911	0.463522	0	0	0	0	0	0	0	0	0	0	0	0	0	0
386	1.51421	0	0	0	1.21651	6.51451	10.9944	8.23759	4.95882	2.27556	1.61014	0.984104	1.58115	3.27205	11.3742	17.508	17.2834	15.7113	15.2325	15.7856	16.2651	17.4115	18.7907	18.151	19.7584	19.8231	19.1488	16.8733	13.4115	10.9132	7.64897	5.13781	3.13171	1.53659	0.773868	0	0	0	0	0	0	0	0	0	0	0	0	0	0
387.07	0	3.99363	0	0	1.06199	7.15001	10.7541	7.66913	4.72356	2.30411	1.59174	1.12516	1.60135	3.23193	11.5555	17.8341	16.9579	15.5355	15.2036	16.1017	16.5464	17.7568	19.297	18.3436	19.6203	20.094	19.64	17.3404	14.6119	11.1548	8.0338	5.36361	3.35045	1.80497	1.02395	0	0	0	0	0	0	0	0	0	0	0	0	0	0
388	0.424679	0.411685	0	0	0.13	9.47011	10.479	8.43512	4.26263	2.14699	1.37504	1.30193	1.63761	3.1973	11.6481	17.8879	16.7164	15.6183	15.469	16.5741	16.6825	17.8121	19.0077	19.2145	20.0209	21.0859	19.6817	18.3141	14.8534	11.1848	8.61311	5.374	3.63912	2.08529	1.26688	0.0856969	0	0	0	0	0	0	0	0	0	0	0	0	0
389.07	2.02312	0	0.918924	0	0.53784	8.89755	10.4717	7.1615	3.8432	2.00861	1.60336	0.849425	1.48496	2.97789	11.3754	17.8257	16.6019	15.9367	15.2976	16.5981	16.9185	17.9456	19.2068	19.5165	20.4101	22.1528	20.1058	18.8579	15.2587	11.5249	8.85298	5.63099	3.8568	2.29256	1.3664	0.415606	0	0	0	0	0	0	0	0	0	0	0	0	0
390	0	0	3.1415	0	0	7.8806	10.4911	7.61245	3.95213	1.82771	1.79713	0.777789	1.23816	2.56721	11.322	17.9707	16.9055	16.4366	15.8698	16.7206	16.7113	18.4914	19.2081	19.6669	20.8664	22.2936	20.6379	18.8823	15.3945	11.849	9.20432	5.95761	4.04742	2.64863	1.54472	0.60065	0	0	0	0	0	0	0	0	0	0	0	0	0
391.07	0	0	9.34238	0	0	7.73271	10.6301	7.53344	4.0728	1.66717	1.80849	0.722889	1.12298	2.76561	11.7738	18.1786	17.5263	16.3975	16.3589	16.989	17.0955	18.6544	20.0438	20.1363	21.1965	21.7239	21.3179	19.0585	16.4599	12.3683	9.26123	6.20889	4.38449	3.11465	1.80706	0.690295	0	0	0	0	0	0	0	0	0	0	0	0	0
392	1.65699	0	6.06369	1.4058	0	8.85861	11.208	8.87583	4.01124	1.71923	1.40525	0.875017	1.13972	2.80311	11.6844	18.1888	17.6672	16.2775	16.3314	17.0807	17.5923	19.0561	20.4323	20.8242	21.7709	21.7628	21.4243	19.33	16.8409	13.0156	9.48486	6.62774	4.71446	3.43244	1.98219	1.0565	0.183175	0	0	0	0	0	0	0	0	0	0	0	0
393.07	0.553162	0	5.96422	2.89009	0.561991	8.254	11.4795	9.00303	3.81219	1.51301	1.29262	1.03681	1.2747	2.8617	11.501	18.1277	17.4257	16.3045	16.1186	17.0388	17.6455	18.895	20.9971	20.7892	22.0195	22.0504	21.7484	20.0786	17.0989	13.1317	9.71617	7.12072	5.21815	3.74067	2.12788	1.49889	0.245117	0	0	0	0	0	0	0	0	0	0	0	0
394	2.27921	0	5.97286	6.77512	2.52017	7.43624	11.0107	9.13672	4.08126	1.403	1.20094	1.11896	1.32708	2.51411	11.5167	18.2012	17.258	16.6568	16.4743	17.1611	17.3781	19.3566	20.978	20.8194	22.652	22.6761	21.593	20.6832	16.9738	13.0966	10.0379	7.31039	5.42735	4.14214	2.1906	1.79946	0.4785	0	0	0	0	0	0	0	0	0	0	0	0
395.07	1.34136	0	5.80053	1.78506	6.4443	8.12609	10.9793	8.24904	3.84074	1.70589	1.24766	0.816995	1.44001	2.68246	11.7577	18.2099	17.5511	16.7041	16.5588	17.2803	17.5018	19.3662	21.0676	20.8312	22.8878	23.3228	21.5538	20.9807	17.5827	13.3515	10.6268	7.58779	5.74718	4.41325	2.69791	1.85956	0.862581	0	0	0	0	0	0	0	0	0	0	0	0
396	0	0	0	0	3.03575	6.70154	11.4246	8.61416	3.39129	2.02367	1.14824	0.879159	1.41707	2.88062	11.7244	18.4642	17.5778	16.5064	16.5759	17.2831	17.7998	19.516	21.0096	20.9752	22.7784	23.9223	22.1	20.9203	17.8313	14.3023	11.3317	8.29833	6.02874	4.4974	3.15061	2.1058	1.15239	0.163507	0	0	0	0	0	0	0	0	0	0	0
397.07	3.18498	0	0	0	1.47849	6.69188	11.6993	8.95802	3.20584	1.79374	1.06386	1.00646	1.34424	2.97609	11.6079	18.773	17.3802	16.7072	16.5269	17.5674	17.9875	19.3132	21.116	21.1527	22.9133	24.0246	22.9892	20.975	18.1925	15.3873	11.7344	9.08905	6.50722	4.71966	3.83724	2.44247	1.43082	0.488203	0	0	0	0	0	0	0	0	0	0	0
398	2.53825	0	0	0	0	6.90865	10.8908	9.1857	3.40063	1.66875	1.26652	1.28524	1.19076	2.51425	11.6051	18.3825	16.9567	16.937	16.8419	17.9954	18.1636	19.4734	21.3622	21.3128	23.2419	24.2501	23.2797	21.3554	18.7513	15.7751	11.5856	9.29649	6.74278	4.99446	4.11533	2.58345	1.68943	0.843416	0	0	0	0	0	0	0	0	0	0	0
399.07	0	0	0.571503	0	0	8.38451	11.368	8.92643	3.26499	1.79469	1.28921	1.05472	1.16994	2.46596	11.8065	18.1378	17.2988	17.0028	16.7271	17.8815	18.4678	19.6069	21.1032	21.3383	23.2647	24.1943	23.2329	22.0742	19.1112	16.0155	11.6866	9.31554	7.02962	5.57115	4.21261	2.90578	1.95066	1.1335	0	0	0	0	0	0	0	0	0	0	0
400	0	0	0	0	0	7.89453	12.2821	9.26342	3.6481	2.09957	0.898444	0.904885	1.3566	2.63068	11.8995	18.1905	17.566	16.5835	16.7551	17.7878	18.4606	19.9235	21.3419	21.7187	23.1306	23.6606	23.6479	22.5328	19.1696	15.8531	12.1619	9.20509	7.29193	5.84968	4.31417	3.2914	2.24032	1.34478	0.0477896	0	0	0	0	0	0	0	0	0	0
401.07	2.63101	0	0	0	0	9.11973	13.0537	8.53603	4.01876	2.10405	0.519689	0.242615	1.63625	2.70693	12.0222	18.3947	17.9133	16.9596	16.4457	17.8262	18.4304	20.0164	21.1072	21.9372	23.5014	23.5846	24.2874	22.393	19.5272	16.6647	12.5895	9.27148	7.68984	6.10732	4.66585	3.7112	2.43152	1.51149	0.122198	0	0	0	0	0	0	0	0	0	0
402	0	0	3.78287	0	0	9.24644	12.2461	9.00826	4.11229	2.11052	0.678472	0.458596	1.61705	2.73421	11.5261	18.0049	17.7304	17.0252	16.5582	17.7462	18.3213	19.9257	21.0955	22.0374	23.4356	24.1377	24.577	22.7001	19.9314	16.9758	12.8484	9.54424	8.34339	6.2363	4.97489	3.79418	2.70185	1.51231	0.422449	0	0	0	0	0	0	0	0	0	0
403.07	0	0	0	0	0	9.74284	11.6063	9.92092	4.03972	1.81857	0.893814	0.191899	1.38663	2.84618	11.5969	17.922	17.7357	17.2286	16.6958	17.7131	18.2891	19.9307	21.5683	21.7114	23.03	24.8042	24.7401	23.0935	19.9433	17.5457	13.5518	9.96882	8.63718	6.70812	5.23529	4.13423	2.87463	1.7348	0.815158	0	0	0	0	0	0	0	0	0	0
404	0	4.60312	0	0	0	9.52604	10.9875	9.93261	4.04012	1.83507	1.02633	0.263638	1.14227	2.60555	11.5753	17.9801	17.4871	16.95	17.0348	17.9229	18.3252	20.1486	21.9671	21.9824	22.9915	24.4797	24.3232	23.2219	20.1501	17.323	14.1202	10.4293	8.57436	7.0503	5.73049	4.50846	3.14684	2.08595	0.99296	0	0	0	0	0	0	0	0	0	0
405.07	0	0	0.695848	1.40514	0	11.0208	11.3935	8.87249	3.8847	1.98035	0.833787	0.275727	0.835997	2.28323	11.5542	18.0367	17.4315	17.129	17.1281	18.3389	18.2693	20.0995	21.6182	22.1657	23.2507	24.395	23.9853	23.1818	20.73	17.6108	14.1556	10.6421	8.40583	7.40912	6.07379	4.71811	3.4909	2.27131	1.12423	0	0	0	0	0	0	0	0	0	0
406	0	0	1.73296	6.78237	0	8.46431	11.4789	8.01095	3.83714	2.24042	0.85639	0.914631	0.858329	2.26278	11.3608	18.1095	17.6085	17.1949	16.9756	18.1712	18.4133	20.051	21.4491	22.2399	23.4103	24.1122	23.548	23.5182	21.0602	18.0729	14.1361	11.3662	8.97241	7.75607	6.25939	4.76691	3.72139	2.32271	1.19102	0	0	0	0	0	0	0	0	0	0
407.07	0	0	0	4.93665	4.4303	7.38468	11.9438	7.61943	4.08073	2.20834	0.96848	0.714202	1.0162	2.52192	11.3991	18.4519	17.7784	17.445	16.8746	17.9471	18.4726	20.1338	21.7706	21.6481	23.2989	24.3614	24.0125	23.7703	21.1491	18.5064	14.6943	11.8426	9.62002	8.23773	6.4964	5.04217	3.84096	2.54732	1.4566	0.0213234	0	0	0	0	0	0	0	0	0
408	0	1.5107	0	7.10378	3.83053	6.76058	12.0124	7.5277	4.38395	1.93025	1.11083	0.834131	1.33127	2.67165	11.3421	18.4241	17.6027	17.2946	17.121	17.6947	18.5628	20.2324	21.7698	21.3077	23.5016	24.5903	24.1058	24.0831	21.4514	18.702	15.4487	12.3227	10.2005	8.41696	7.01685	5.50768	4.10232	2.97938	1.68725	0.373993	0	0	0	0	0	0	0	0	0
409.07	0	0	2.20655	3.41006	4.73472	7.30783	11.262	8.666	4.28761	1.58454	0.706369	0.77196	1.17557	2.68658	11.2494	18.1059	17.5551	16.8186	17.4591	17.585	18.1818	20.1395	21.7298	21.5237	23.8259	24.9144	24.2618	24.2645	21.6537	18.8503	15.5748	12.4518	10.3882	8.57241	7.52233	5.722	4.52653	3.29672	2.01714	0.67933	0	0	0	0	0	0	0	0	0
410	0	0	5.66617	0	3.45091	7.54057	11.6259	9.6345	3.67128	1.83884	0.757451	0.770658	1.117	2.43452	11.489	18.1452	17.5587	16.7497	17.0988	17.3948	18.1338	20.2946	21.5802	21.8266	24.2952	25.0377	24.2484	23.7349	22.2357	19.199	15.6595	12.9894	10.2781	8.84318	7.72346	6.15731	4.69744	3.59163	2.31345	0.761078	0	0	0	0	0	0	0	0	0
411.07	0	0	4.5632	0	3.42887	7.86061	11.9153	8.01983	3.31281	1.98999	0.931156	0.185596	0.73491	2.58969	11.6444	18.2677	17.6664	17.0132	16.837	17.5577	18.3123	20.3012	21.1936	21.9173	24.4265	25.0909	24.6836	23.2369	22.4375	19.0545	15.9332	13.4784	10.4053	9.18551	7.86078	6.35246	5.0516	3.92348	2.31609	0.882916	0	0	0	0	0	0	0	0	0
412	0	0	0	0.773453	0	8.71173	12.6871	7.07356	3.46386	1.79668	0.954928	0.160943	0.872612	2.7859	11.602	18.1963	17.6408	17.6083	16.9221	17.7769	18.433	20.1843	20.6353	22.0322	23.4516	24.6246	24.5437	23.1611	22.5151	19.2307	16.4335	13.5774	10.7095	9.16057	7.98556	6.71311	5.17835	4.11577	2.4003	1.16929	0	0	0	0	0	0	0	0	0
413.07	0	0	0	0	0	7.68693	12.353	8.33594	3.98906	1.31514	0.775197	0.789654	0.865884	2.48186	11.5268	17.8222	17.4976	17.6085	17.1776	18.0195	18.3781	19.8484	21.1024	22.2175	23.415	24.1753	24.6167	24.1741	22.4864	19.9333	16.6266	13.8454	11.0776	9.39626	8.23646	6.87705	5.61329	4.25376	2.71936	1.3095	0	0	0	0	0	0	0	0	0
414	4.85966	0	0	0	0	8.68006	12.134	10.3108	4.08032	1.55219	0.635186	1.07584	0.976399	2.1735	11.3308	17.6698	17.0735	17.348	16.8096	17.7537	18.0817	19.4827	21.2409	21.8738	23.3656	24.4793	24.7079	24.67	22.905	20.3213	16.9517	14.0966	11.3436	9.70585	8.66221	7.43161	5.80693	4.41829	3.11437	1.51536	0	0	0	0	0	0	0	0	0
415.07	0	0	0	0	0.375826	7.65872	11.5866	9.36217	4.25484	1.49691	0.821973	0.623185	0.939482	2.43285	11.0446	17.4872	17.2414	16.9048	16.8459	17.7651	17.984	19.3417	21.274	21.6455	23.9251	24.6805	25.0031	24.499	22.7968	20.3424	17.2694	14.6008	11.7273	10.0809	9.04073	7.44925	6.09793	4.64388	3.24065	1.68946	0	0	0	0	0	0	0	0	0
416	0	0	0	0	0	8.21215	11.716	7.79958	4.55641	1.47444	0.841072	0.12501	1.092	2.79117	11.2083	17.5443	17.7142	16.8921	16.8815	17.9526	17.7772	19.4925	21.2864	21.2879	23.0533	24.5349	25.1678	24.1898	22.58	20.2561	17.7212	14.7263	12.3365	10.5676	9.22885	7.66404	6.23015	4.7713	3.29283	2.00669	0	0	0	0	0	0	0	0	0
417.07	0	2.68128	0	0	0	8.876	11.8046	7.47267	4.35197	1.33193	0.899174	0.521843	0.94867	2.47864	11.1453	17.9596	17.8257	17.0891	16.9871	18.3223	17.7886	19.6174	21.6901	21.1376	22.8492	24.4327	25.4501	24.2715	23.0227	20.489	18.1634	15.1304	12.8522	11.0291	9.19447	8.08572	6.54888	5.0681	3.57502	2.23017	0	0	0	0	0	0	0	0	0
418	3.07274	0	0	5.73431	0	9.82402	11.2589	7.31157	3.65817	1.45625	0.640415	1.16879	0.916471	2.43418	11.2924	17.9578	17.7509	17.1706	16.7847	18.1705	17.8702	19.3425	21.0303	21.0054	22.8577	24.4743	25.7779	24.3281	23.2183	20.7678	18.311	15.6427	13.2124	11.0478	9.53199	8.60867	6.87882	5.30923	3.87848	2.22999	0	0	0	0	0	0	0	0	0
419.07	6.20203	0	0	10.7482	0	9.15361	11.207	8.14333	3.33703	1.6592	0.777304	1.24525	0.835221	2.4888	11.2152	17.7108	17.5452	16.9359	16.8995	18.0977	17.8604	19.2432	20.2429	21.4134	23.299	23.8376	24.8703	24.3225	23.1492	20.4348	18.1485	15.7252	13.5711	10.9312	9.79899	8.93435	7.2861	5.66694	4.04261	2.39456	0.281647	0	0	0	0	0	0	0	0
420	2.76138	0	0	1.28778	0	7.45267	10.6508	8.19512	3.78748	1.9433	0.727925	0.954243	0.65765	2.13317	11.6693	17.3339	17.4026	17.0803	16.99	17.9484	17.7036	19.4847	20.4399	21.376	23.4362	23.6672	24.2971	24.5366	22.9427	20.5147	18.4192	15.9014	13.858	11.47	10.1601	9.01467	7.71551	5.87454	4.16504	2.6341	0.384625	0	0	0	0	0	0	0	0
421.06	3.43417	0	0	0	2.61056	7.44876	10.9184	8.60312	3.8305	1.85553	0.752619	0.519499	0.661289	1.63219	11.7244	17.2729	17.5667	17.223	16.8207	17.6258	17.7344	19.4501	20.7906	21.147	22.8405	24.0238	24.2429	24.4352	22.763	21.0082	18.4765	16.3874	14.287	12.1655	10.3463	9.08374	7.59938	6.10459	4.39443	2.72874	0.537045	0.0317091	0	0	0	0	0	0	0
421.96	2.52438	0	0	0	0	7.22471	10.7962	7.7221	3.93339	1.33553	0.490536	0.403421	0.659783	1.78103	11.282	17.3699	17.8932	17.4912	16.7851	17.1323	17.5309	19.141	20.7702	20.6402	22.8597	24.647	25.2298	24.3051	22.8573	21.7164	18.6708	16.9191	14.4009	12.2594	10.5308	9.03257	7.84639	6.22884	4.67827	2.78598	0.653822	0.0665593	0	0	0	0	0	0	0
423.03	4.34099	0	0	0	0	7.30067	11.4026	8.22766	3.9042	1.26522	0.623846	0.392576	0.594075	2.14407	10.9363	17.4815	17.7731	17.1447	16.8133	17.2614	17.0977	18.9302	20.4911	20.6522	22.4008	24.8803	24.5181	24.0654	23.0705	21.2091	18.6847	16.5515	14.62	12.1857	10.7523	9.54345	8.15552	6.62168	4.85441	3.11072	0.874716	0.0787187	0	0	0	0	0	0	0
423.93	5.42964	0	0	0	0	6.85748	10.8197	7.49443	4.19909	1.49818	0.645108	0.327068	0.376405	2.20891	10.9014	17.5352	17.5586	16.8231	16.992	17.321	16.7725	19.1175	20.4317	20.9666	22.097	24.5825	24.2587	24.1722	23.1054	20.5534	19.2752	16.5765	14.6286	12.3994	11.1166	9.92052	8.38765	6.77758	5.01022	3.46693	0.992262	0.0900106	0	0	0	0	0	0	0
425	0	0	0	0	0	7.70351	11.9933	6.87051	3.70023	1.82874	0.536156	0.307851	0.377127	2.2018	11.0522	17.2103	17.6127	16.955	16.8705	17.2642	16.8718	18.8804	19.9191	21.082	21.9433	23.5907	24.1415	23.897	22.3639	20.6323	19.0637	16.9773	14.9195	12.9178	11.3284	10.0123	8.47111	6.97784	5.16048	3.60248	0.985742	0	0	0	0	0	0	0	0
426.06	0	0	0	0	0.965535	7.17376	12.0397	7.07711	3.76338	1.57306	0.433933	0.315139	0.362172	2.27318	10.7356	17.2396	17.4336	17.2172	16.7539	16.8932	16.9113	18.9036	19.9004	20.6989	22.0664	22.9693	24.4891	23.7495	22.6459	21.103	19.0674	17.3627	15.354	13.4034	11.2884	9.90275	8.62835	7.13935	5.57398	3.81479	1.13785	0.0358036	0	0	0	0	0	0	0
426.96	0	0	0	0	3.22117	6.27466	11.5257	7.48341	3.11584	1.73389	0.638394	0.46047	0.484992	2.18347	10.6672	17.5525	17.28	17.0275	16.6609	16.9779	17.1875	18.5037	19.8247	20.5092	21.8644	23.0481	23.7491	23.7717	23.3286	21.493	18.7065	17.2782	15.6067	13.8116	11.1947	9.83886	8.852	7.35896	5.841	4.07715	1.61908	0.291668	0	0	0	0	0	0	0
428.03	0	0	0	0	2.90594	7.58738	10.7534	7.05796	3.43992	1.75675	0.373503	0.00770136	0.677027	1.79735	10.6163	17.9394	16.8811	16.6203	16.4976	17.2456	17.1833	18.2909	19.6629	19.9437	21.4298	22.8757	23.4124	24.0704	23.2334	21.3324	18.7768	17.5486	15.539	13.8598	11.5545	9.85276	9.08841	7.56661	5.9458	4.32406	2.08082	0.627745	0	0	0	0	0	0	0
428.93	0	0	0	0	0	8.83812	10.8624	5.93118	2.88873	1.55498	0.184001	0	0.440001	1.56508	10.5786	17.7604	17.0679	16.638	16.5287	17.002	16.7298	17.9772	19.7858	19.5185	21.5579	22.582	23.0203	23.9283	22.669	21.1131	18.9472	17.6584	15.4101	13.7831	12.1154	10.0282	9.49902	7.82376	5.95987	4.58497	2.58179	1.02489	0	0	0	0	0	0	0
430	0	0	0	0	0	9.3034	10.6959	7.07647	3.43246	1.1598	0.352591	0.195189	0.333213	1.57894	10.6932	17.185	17.2299	16.7919	16.5138	16.6252	16.2556	18.1131	19.7976	19.5243	21.4471	22.5764	23.0961	23.2061	22.6997	21.0038	19.2839	17.5168	15.501	13.898	12.7689	10.4968	9.47896	8.12421	6.25715	4.64802	2.98431	1.72156	0.174559	0	0	0	0	0	0
431.07	0.243173	0	0	0	0	8.14218	9.40951	7.70189	3.69335	0.921798	0.548797	0.328269	0.307326	1.94568	11.0002	17.1493	17.5746	16.9593	16.4139	16.0371	16.3438	17.8921	19.0823	19.9538	20.9027	22.8343	22.997	22.714	23.1946	21.049	19.3764	17.6209	15.6846	14.1055	13.0379	10.8508	9.45697	8.28285	6.43763	4.8091	3.39023	2.28674	0.753244	0.355279	0.00914542	0	0	0	0
432	6.99503	0	0	0	0	7.46978	9.02953	7.70648	3.73094	0.930102	0.283685	0.268066	0.620058	2.02297	11.0755	17.1779	17.5609	17.1386	16.3453	16.3052	16.4397	17.6342	18.1624	20.1844	20.2327	22.382	22.7934	22.5691	22.4621	21.1294	19.2195	17.6967	15.5385	14.0921	13.0381	11.0367	9.56194	8.41422	6.67489	5.32191	3.69942	2.54289	1.20027	0.713046	0.293676	0	0	0	0
433.07	0	0	0	0	1.26768	7.72756	9.10484	6.94223	3.08507	0.815193	0.355217	0.134633	0.387419	1.87738	10.7968	17.369	17.2484	16.814	16.4605	16.1545	16.41	17.3071	18.1092	19.8256	20.3346	22.2099	22.4449	23.0542	22.3985	21.1956	19.5782	17.8265	15.4595	14.2663	12.8301	11.2168	9.86743	8.35792	7.00125	5.59148	3.98822	2.7514	1.81584	0.931151	0.541005	0	0	0	0
434	0	0	2.25339	0	0	7.78125	10.1526	6.82936	2.77409	0.883546	0.638732	0.438331	0.386352	1.82659	10.3861	17.5193	17.2988	16.895	16.5127	16.3389	15.7469	16.8124	18.2432	19.2761	20.6668	22.013	22.3353	23.5123	22.4434	21.1912	19.5591	17.5776	15.7834	14.4762	13.1182	11.5337	10.1267	8.57435	7.23597	5.56166	4.20121	2.97394	2.12583	1.27815	0.816809	0	0	0	0
435.07	6.34936	0	1.41886	0	0	6.72579	10.1464	6.65965	3.15963	0.954024	0.761591	0.112695	0.266262	2.05568	10.6759	18.0712	17.3586	17.385	16.5847	16.1837	15.4773	16.6056	17.8659	18.7449	20.7084	21.9868	22.4321	23.1212	22.8442	20.9103	19.5815	17.5309	16.3473	14.906	13.5783	11.6732	10.2746	9.10816	7.14763	5.63454	4.4191	3.28587	2.40768	1.61342	0.983864	0	0	0	0
436	3.75313	4.09086	0	0	0	5.31095	10.0354	6.42499	2.97798	1.11564	0.846216	0	0.310533	2.06585	11.1806	17.8827	17.5311	17.8972	16.4691	16.2812	15.2578	16.5023	17.7313	18.3178	20.1221	21.6392	22.3191	22.2138	22.4644	21.068	19.2156	17.3932	16.1714	15.1543	13.6924	11.9163	10.4382	9.52898	7.41231	6.00332	4.6868	3.69402	2.53151	1.78853	1.01526	0.310678	0	0	0
437.07	4.2486	6.00564	0	0	0	5.51496	9.2816	6.29879	3.16198	1.20456	0.617043	0	0.176959	1.99149	11.1295	17.44	17.0308	17.2194	16.0653	16.1396	15.6218	16.1908	17.3072	17.5357	19.9019	21.4857	21.8689	21.9221	22.1858	21.1668	19.4663	17.6172	16.0141	14.9998	13.4549	11.9604	10.4536	9.39363	7.88697	6.16792	4.78948	4.01378	2.79459	1.88758	1.1593	0.458859	0	0	0
438	0.673075	7.7761	0	0	0	5.84781	8.98134	6.38726	3.03503	0.981822	0.494605	0	0.471781	1.9549	10.9738	17.2847	17.5379	16.4897	15.9168	15.8396	15.6377	15.9931	16.8657	17.512	19.7466	21.2826	21.0982	22.6951	21.7946	20.8409	19.7564	17.7593	16.2009	14.7683	13.6762	12.242	10.5223	9.33488	8.30379	6.34719	5.04165	4.04554	2.93358	2.11712	1.32458	0.647515	0	0	0
439.07	2.63318	7.69374	0	0	0	6.23392	8.81197	5.83395	2.41118	0.747396	0.0660678	0	0.456552	1.92584	10.956	17.705	17.9832	16.5116	16.0808	15.7746	15.5943	16.0585	16.6377	17.8674	19.7199	21.3089	20.9771	22.9343	21.9697	20.6139	20.0434	17.9952	16.6236	15.0271	14.0333	12.4191	10.4974	9.50231	8.34193	6.68192	5.2428	4.17693	3.10998	2.34117	1.45294	0.718276	0	0	0
440	0	0	0	0	0	5.70253	9.17453	5.83814	2.34719	0.755107	0.466639	0	0.327725	1.7361	11.3861	18.2214	18.0525	17.1499	15.9486	15.7112	15.3899	15.9497	16.8685	17.929	19.1245	21.1979	21.1459	22.2337	21.8647	21.1816	19.7059	17.9504	16.55	15.3312	14.3237	12.6497	10.8991	9.96103	8.48373	7.06047	5.43971	4.46863	3.18369	2.50889	1.57228	0.917692	0	0	0
441.06	0	0	4.65741	0	0	3.65323	8.69766	6.05616	2.93764	0.834628	0.45625	0.00738406	0.0766143	1.90751	11.0068	18.3829	17.5863	17.0926	15.979	15.6996	15.2297	15.7006	17.0326	17.3909	18.9389	20.8772	21.1439	21.2834	21.8274	21.3107	19.2463	18.0141	16.5207	15.3749	14.5152	12.5018	11.1619	10.2518	8.54177	7.39415	5.62726	4.69438	3.43842	2.53743	1.80475	1.03241	0	0	0
441.96	0	7.1114	2.49417	0	0	4.61976	8.42409	6.86886	3.16446	0.844068	0.456913	0.216339	0.158549	2.11159	11.1089	18.2947	17.8633	17.0959	16.0509	15.5302	14.9793	15.6418	16.9276	17.2499	18.8236	20.5389	20.7653	20.9454	21.5642	20.5978	18.8303	17.7986	16.613	15.2504	14.7125	12.7108	11.4852	10.5861	8.75513	7.56108	5.91845	4.82065	3.64865	2.55163	1.89052	1.12122	0.12907	0	0
443.03	0	5.7818	0	0	0	3.30729	8.52818	6.89883	2.59597	0.638133	0.0370048	0	0.0533155	2.27529	10.9441	18.0893	17.8788	17.5187	16.2646	15.6052	14.6395	15.8196	16.7243	17.2963	18.9959	19.9046	20.2788	21.3134	21.7239	20.0794	18.9323	18.0188	16.8114	15.1406	14.6556	13.1314	11.7326	10.4885	9.06694	7.66578	6.09801	4.97025	3.78826	2.71198	2.04224	1.14787	0.263335	0	0
443.93	0	0	0	0	0	0.177231	9.26035	6.88684	2.25404	0.733961	0.102038	0	0.280148	2.14144	11.597	18.0928	17.7748	17.7341	16.2468	15.6241	14.6648	15.5982	16.5213	16.9314	18.6219	18.9419	19.9401	21.3031	20.5909	20.0807	19.083	18.1179	16.8848	15.1015	14.4096	13.2923	12.0227	10.5167	9.0716	7.68279	6.24185	5.13647	3.97136	2.97958	2.15242	1.30792	0.437452	0	0
445	0.8894	0	1.30969	2.03834	0	0	8.8291	6.47259	2.25972	0.878436	0.279579	0	0.160619	2.09285	11.5254	18.1001	17.6506	17.4117	16.3221	15.4905	14.6837	15.2488	16.2858	16.405	18.3108	18.8483	19.8894	21.2637	20.0244	20.2002	19.2234	18.3145	16.7694	15.6458	14.5334	13.2593	12.1231	10.7817	9.06684	7.78171	6.43187	5.27974	4.19977	3.14908	2.30789	1.51694	0.560854	0	0
446.06	0	0	0	0.526839	0	0	8.30369	4.86521	2.22519	0.820283	0.283981	0.314611	0.254944	1.73105	11.643	18.4168	17.86	17.1212	16.21	15.3803	14.6703	14.8402	16.3192	16.1862	17.9805	19.4355	20.1069	20.8957	19.7505	20.185	18.8207	18.2308	16.6268	15.9989	14.8381	13.6116	12.498	11.0189	9.35329	7.84485	6.64996	5.44226	4.46365	3.41382	2.41485	1.61017	0.703063	0	0
446.96	0	0	0	5.79881	0	0	8.6006	5.62595	2.17918	0.855913	0.11184	0.228816	0.177205	1.60127	11.3913	18.7328	18.3778	17.1633	16.5129	15.2358	14.2836	14.9141	16.0116	16.2573	17.8687	19.7721	20.3216	21.1759	20.5181	20.156	19.025	18.084	16.7459	15.6955	15.1891	13.8972	12.7734	11.0768	9.94023	8.0502	6.96265	5.64547	4.48403	3.69877	2.6115	1.72384	0.776134	0	0
448.03	0	0	0	5.2015	0	0	8.68097	6.21854	2.17867	0.520622	0.135193	0	0.30594	1.6647	11.4549	18.4586	18.5575	17.1978	16.9733	15.2648	14.0103	14.992	16.0753	16.1344	17.8222	19.1683	20.2304	20.6316	20.4133	20.3587	18.9549	17.7968	17.0555	15.545	15.3539	13.931	12.7171	10.9613	10.1318	8.36968	7.24279	5.9158	4.76274	3.8551	2.71786	1.8595	0.920348	0.0251553	0
448.93	12.2475	3.96782	0	2.62722	0	0	7.62538	6.15693	2.53044	0.325912	0.101694	0	0.241265	1.86204	11.3659	18.3296	19.021	17.666	16.9553	15.1241	13.9375	14.8327	15.9693	16.0715	17.3616	18.8102	19.6349	20.3563	20.5014	20.1885	18.642	17.9378	17.1032	15.5925	15.4182	14.0353	12.8138	11.4411	10.3792	8.78853	7.53534	6.19014	4.9597	3.92332	2.99066	1.90335	0.977269	0.195171	0
450	12.2939	9.5299	6.9634	0	0	0	6.59726	4.73337	2.90236	0.209059	0	0	0.289836	1.76979	11.3379	18.447	18.9297	17.9784	16.5183	15.0433	14.234	14.3329	15.4354	15.6537	17.4949	18.4704	19.4694	19.6521	20.267	19.7508	18.5652	17.9925	17.1674	15.9515	15.3567	14.5703	13.157	11.834	10.4434	8.88885	7.69175	6.39301	5.194	4.06154	3.212	1.958	1.0916	0.402532	0
451.06	14.1381	9.52231	10.6986	0	0	0	6.41841	5.52392	2.25007	0.456655	0	0	0.12675	2.05707	11.5793	19.0112	19.3769	18.249	16.3927	14.9635	13.8043	14.2777	14.9351	15.4007	17.3151	18.5479	19.6069	19.907	20.1901	19.6428	19.0744	17.9542	17.1096	16.0697	15.2767	14.5595	13.4399	12.3029	10.3949	8.88081	7.98073	6.58895	5.30618	4.15869	3.26216	2.14536	1.25091	0.549544	0.0408823
451.96	7.92487	5.20128	0	0	0	0	5.12827	5.85946	1.97704	0.257251	0	0	0	2.09623	11.6095	19.2968	19.0533	18.1724	16.6575	15.1103	13.7793	14.4237	14.861	15.1915	16.8566	18.6312	19.9361	19.8179	19.9792	20.0385	19.0699	17.333	17.1358	16.1546	15.8995	14.5982	13.5533	12.3478	10.3982	8.99865	8.06623	6.79466	5.52024	4.39503	3.27147	2.34461	1.46806	0.770407	0.0662656
453.03	2.58894	0	0	0	0	0	0.245566	5.04591	1.71221	0.198437	0	0	0	2.0306	11.46	19.5332	19.4874	18.4004	16.568	15.141	13.8313	14.3367	15.0482	15.1149	16.4127	18.7559	19.5745	20.0674	19.8872	20.0063	18.6921	17.7245	17.0037	16.0678	16.1502	14.6802	13.7658	12.5079	10.8572	9.15367	8.30839	6.98356	5.70897	4.57479	3.53104	2.48923	1.62408	0.910114	0.26089
453.93	0.49618	0	0	0	0	0	0	4.59595	1.58477	0.330143	0.0925263	0.194683	0.194787	1.8828	11.628	19.1959	19.6467	18.4377	16.7511	15.3406	13.7887	13.7479	14.9245	14.9606	16.7824	18.3991	19.467	19.7827	19.6811	19.4461	18.7619	18.4542	17.2598	16.2798	16.1236	15.1633	13.6127	12.6499	11.3211	9.4638	8.33713	7.10804	5.99502	4.78635	3.84992	2.62605	1.7137	1.00448	0.431477
455	0	2.88624	0	0	0	0	0	5.13415	1.47217	0.276583	0.0917535	0.281282	0.0537229	1.76667	12.595	19.0683	19.6067	18.661	17.3861	15.3298	13.5215	13.6351	14.7391	15.1378	16.8885	17.6449	18.6313	19.8167	19.6961	19.1484	18.9174	18.5769	17.3501	16.1937	15.837	15.0279	13.9144	12.9099	11.3917	9.75294	8.66435	7.29606	6.20857	4.91773	3.9425	2.76	1.82016	1.11233	0.630943
456.06	0	0	0	0	0	0	0	4.85974	1.88276	0	0	0	0	1.39985	13.2127	19.0952	19.0901	18.7664	17.2666	15.2376	13.5983	13.5469	14.5598	14.6832	16.477	17.2526	18.0671	19.651	19.7595	18.9309	18.4105	18.0454	17.3778	16.037	16.1245	15.1894	14.2599	13.3021	11.6591	10.039	8.77703	7.51112	6.40172	5.08636	3.98778	2.88907	1.90066	1.37825	0.694563
456.96	0	0	0	0	0	0	0	3.99276	1.84167	0	0	0	0	1.42217	12.6701	19.1596	19.266	18.8981	16.6834	15.1991	13.634	13.3643	14.5348	14.2916	16.4704	17.3536	17.8745	19.3573	19.2407	18.9313	18.427	17.7496	17.109	15.9785	16.2166	15.312	14.5633	13.3961	11.9506	10.1048	8.90551	7.73425	6.54566	5.22235	4.0434	3.04581	2.02862	1.4891	0.826929
458.03	0	0	5.13019	0	1.43743	0	0	3.53613	1.14304	0.14343	0	0	0	1.86188	12.274	19.2255	19.7942	18.7612	16.5469	15.207	13.4331	13.0888	14.3887	14.2738	16.4359	17.1882	17.8428	18.8268	18.8457	18.8207	18.5243	18.0139	17.2494	16.2199	16.3901	15.7784	14.6145	13.3733	12.2461	10.1581	8.99961	7.87999	6.71137	5.38715	4.22909	3.13652	2.16643	1.49388	0.915843
458.93	0	3.20974	0	0	2.47936	0	0	3.17685	1.19998	0.302013	0	0	0	1.78802	12.4236	19.5694	20.0247	18.6942	16.9887	15.2525	13.6564	13.3377	13.9806	14.4926	16.0708	16.9328	17.7253	18.9022	18.5494	18.9438	18.7712	17.7943	17.4988	16.277	16.5053	15.8644	14.4574	13.4363	12.0717	10.3806	9.21456	8.19045	6.84891	5.46215	4.40239	3.16724	2.29835	1.56717	1.08909
460	0	0	0	0	0	0	0	1.36788	0.831084	0.302079	0	0	0.00255684	1.5888	12.3753	19.7172	19.8114	19.224	16.856	15.0941	13.5261	13.3025	13.8833	14.2959	15.5391	16.6265	17.2829	19.0503	18.4795	18.5774	18.3998	17.4792	17.5341	16.6666	16.4731	15.7886	14.3781	13.7861	12.0099	10.5939	9.48761	8.32419	7.05785	5.54173	4.55547	3.217	2.39815	1.77678	1.19446
461.06	0	0	0	0	0	0	0	0	1.25466	0.25144	0	0	0.0105753	1.57279	12.0896	19.8056	20.0033	19.382	16.5452	15.0991	13.4497	13.0872	13.7191	14.3097	15.6862	16.523	17.3119	18.682	18.591	18.2224	18.3405	17.3913	17.0054	16.5513	16.5088	15.6853	14.3639	13.744	12.1451	10.8973	9.75559	8.45061	7.04301	5.79974	4.70501	3.47404	2.53272	1.84583	1.3452
461.96	0	0	0	0	0	0	0	0	1.27549	0.402222	0	0	0	1.92697	12.2016	19.938	19.8124	19.2055	16.6457	15.1653	13.1733	12.7273	13.7431	14.6951	15.7543	16.2214	16.973	17.969	18.8071	18.3098	17.7784	17.6162	16.9914	16.4727	16.7026	15.8895	14.4618	13.8141	12.495	10.8804	9.90912	8.47584	7.11374	6.21596	4.89596	3.56359	2.67978	1.89837	1.41823
463.03	0	0.44598	0	0	0	0	0	0	1.42217	0.255759	0	0	0	1.90711	12.5028	20.1054	19.7386	18.9029	16.6813	15.2744	12.928	12.5807	13.5556	14.3403	15.3101	16.4042	16.9293	18.3239	18.8328	18.7814	17.6146	17.6119	17.3071	16.2365	16.7608	15.9683	14.5631	13.9867	12.6549	11.1767	9.9395	8.9131	7.25246	6.38762	5.01409	3.63627	2.79612	2.0039	1.504
463.93	6.76618	0	0	0	0.788416	1.19211	0	0	1.578	0.0526996	0	0	0	2.01413	12.1162	20.0113	19.7617	19.3011	17.0378	15.1998	12.6556	12.4247	13.7029	13.8763	15.0033	16.3789	16.6553	18.4291	18.4162	18.5618	17.4597	17.2481	17.2849	16.1543	16.327	16.0554	14.89	14.3854	12.7077	11.5599	10.0877	9.11275	7.57192	6.40737	5.03317	3.73547	2.90591	2.13128	1.6471
465	9.32231	0	0	0	0.58382	4.12171	0	0	1.66269	0.145712	0	0	0	1.82942	12.2406	19.8434	20.3373	19.2306	17.1887	15.079	12.6795	12.4885	13.1083	13.0328	15.0375	16.0991	16.7921	17.7628	18.1243	17.9368	17.6081	17.2113	16.5944	16.042	16.2575	15.9535	15.2536	14.2915	12.7877	11.6914	10.4613	9.3293	7.61003	6.51694	5.13908	3.90487	2.89046	2.15257	1.73562
466.06	14.1962	0	0	0	1.6636	6.23851	0	0	0.782225	0	0	0	0	1.92934	12.0694	19.9002	20.4074	18.6742	17.3597	15.0212	12.6189	12.3254	12.9883	13.0025	14.877	15.6366	16.6181	17.1021	17.9888	17.5745	17.8591	17.3619	16.4219	16.2235	16.2093	16.0343	14.9589	14.2014	13.1729	11.5024	10.5212	9.15623	7.84543	6.64183	5.26567	3.95695	2.88433	2.17003	1.81762
466.96	10.3612	0	7.67234	0	0.788658	5.89714	0	0	0.335889	0	0	0	0	1.69485	12.1929	20.1851	19.8368	18.6409	17.2592	14.9797	12.2857	12.0874	12.5927	12.7724	14.2773	15.7448	16.6525	17.003	17.8116	17.2872	17.8534	17.4848	16.6906	16.3424	16.2948	16.1	14.8007	14.1848	13.3224	11.5689	10.8017	9.2599	7.88823	6.63593	5.44527	4.06621	2.92522	2.21196	1.87408
468.03	5.89636	7.87044	5.24342	1.5348	0	5.87207	0	0	0.657669	0.000923635	0	0	0	1.68135	12.2553	20.2007	19.7312	19.0145	17.2557	15.0209	12.4437	11.8282	12.4629	12.8993	13.9671	15.4194	16.6635	17.0112	17.3959	17.44	17.6017	17.3389	16.9517	16.1638	16.1063	16.1967	14.9852	14.2203	13.6466	11.8935	10.8032	9.44399	7.89077	6.69202	5.4842	4.22428	3.02717	2.35422	1.94606
468.93	0	9.69625	3.23289	4.09334	0	5.40498	0	0	1.13428	0.244369	0	0	0.111182	1.60552	12.5225	19.7859	19.8806	19.0441	16.9329	15.0474	12.5168	11.9846	12.2383	12.6207	13.7545	14.9297	16.4196	16.4094	16.8106	17.4084	17.1921	16.9343	16.7493	16.3249	16.5286	15.808	15.2694	14.3039	13.711	12.072	10.8087	9.60285	7.78716	6.75863	5.46786	4.27252	3.12352	2.52172	1.95453
470	1.38764	5.26238	0	1.43988	0.493471	4.7766	0	0	0	0	0	0	0	1.48692	12.098	19.6511	19.9576	18.512	16.4688	14.5907	12.4522	11.826	11.9668	12.4775	13.374	14.4032	15.7719	16.2413	16.8055	17.1264	17.0105	16.5483	16.572	16.2793	16.076	15.4353	14.7432	14.265	13.5322	12.1003	10.8023	9.43352	7.95778	6.80078	5.50369	4.31279	3.31999	2.65603	2.02664
471.06	0	2.90836	0	0	1.2033	3.4918	0	0	0	0	0	0	0	1.40061	12.2263	20.1201	19.6534	18.4409	16.6886	14.1864	12.0129	11.3767	12.0325	12.2747	13.5857	14.7372	15.7694	16.2089	16.507	16.3302	16.4794	16.7839	16.1434	16.2338	15.8878	15.3758	14.4953	14.3316	13.1513	12.1468	11.0411	9.38118	8.11282	6.92288	5.7281	4.4035	3.39886	2.62671	2.10426
471.96	0	0	0	1.40747	0	3.52176	2.62139	0	0	0	0	0	0	1.30225	12.2759	20.357	19.3824	18.7909	16.5306	13.7785	11.9732	11.0599	12.1539	12.0282	13.8088	14.4212	15.8986	16.2963	16.0452	16.2145	16.305	16.7636	15.8089	15.844	15.7185	15.2999	14.8994	14.3991	13.1913	12.1279	11.1207	9.49734	8.1495	7.15674	5.7938	4.47314	3.44265	2.68358	2.1619
473.03	0	0	0	6.49523	0	4.70987	3.88755	0	0	0	0	0	0	1.5864	11.972	20.109	19.2346	18.73	16.2983	13.5768	11.88	11.5904	12.0597	11.6891	13.6501	14.43	16.0185	15.9152	15.8528	16.6616	16.6091	16.302	15.6794	15.873	15.9666	15.2354	15.2097	14.5834	13.3929	12.0425	11.0295	9.75251	8.17716	7.13216	5.80941	4.55637	3.41977	2.72684	2.27285
473.93	0.511327	6.95338	0	6.25174	0	4.30092	4.32588	0	0	0	0	0	0	1.44302	11.8812	19.7419	19.3717	18.4259	16.5523	13.717	11.8285	11.585	11.7638	11.7878	12.8481	14.0852	15.7312	15.7123	16.1806	16.7343	16.7197	15.9698	15.6895	15.5887	15.7388	15.4035	15.1195	14.5377	13.3944	12.2096	11.0701	9.94427	8.20207	7.04606	5.89308	4.57714	3.44317	2.78638	2.36851
475	0	4.09301	0	0.142512	0	3.53656	4.36034	0	0	0	0	0	0	1.47078	12.4983	19.512	19.5763	18.367	16.9481	14.1279	11.6397	11.3291	11.4839	11.9085	12.7467	14.1951	15.271	15.4206	16.2482	16.3735	16.1472	16.1193	15.5269	15.5894	15.6266	15.5158	15.0769	14.4197	13.3308	12.2389	11.0819	9.84925	8.13089	6.90851	5.97744	4.62508	3.40789	2.78501	2.35203
476.06	0	2.21757	2.55151	0	0	3.82296	4.80347	0	0	0	0	0	0	1.38974	12.5254	19.4073	19.7063	18.6102	16.2635	14.1878	11.3705	10.8352	11.3826	12.0266	12.5324	13.6658	14.4309	15.1602	15.657	15.3815	15.6574	15.8449	15.4023	15.2111	15.483	15.4437	14.7577	14.464	13.072	12.3256	11.1239	9.80288	8.07424	6.96112	5.92585	4.56654	3.56519	2.88138	2.40665
476.96	0	0	2.64567	1.74383	0.172525	5.06373	4.47498	0	0	0	0	0	0	1.35006	11.6922	19.5371	19.3778	18.3397	15.725	13.9344	11.0932	10.7378	11.0487	11.2052	12.2783	13.135	14.1395	14.9583	15.2821	15.1218	15.5426	15.5528	15.5271	15.0192	15.2894	15.2663	14.4819	14.3477	12.9098	12.2389	11.1146	9.95306	8.13996	7.06809	5.85408	4.56335	3.58574	2.85245	2.48309
478.03	5.91652	0	6.12362	0.668501	0.0719256	5.76712	4.41038	0	0	0	0	0	0	1.33995	11.2038	19.8521	19.1213	18.337	15.468	13.6348	10.9773	10.3912	11.1003	10.855	11.9587	12.5669	14.0787	15.0705	14.8344	14.9439	15.5197	15.4492	15.4517	14.7907	15.0634	15.1792	14.5551	13.9597	12.9652	12.3508	11.2702	10.054	8.21254	7.16709	5.90443	4.66106	3.56316	2.88308	2.56558
478.93	0	5.07388	0	0	0	4.43329	4.27549	0	0	0	0	0	0	1.54518	11.1838	19.6651	18.8092	18.2767	15.526	13.1444	11.1164	10.0245	10.9238	10.5714	12.0991	13.0025	14.1523	14.6247	15.138	15.3029	15.1843	15.3696	15.2167	14.8123	15.0865	15.0706	14.6697	13.7734	13.1776	12.2721	11.3318	9.95075	8.37902	7.0079	5.93034	4.7302	3.64389	3.01331	2.57828
480	2.4106	7.79244	2.06411	0	0	1.71588	4.50711	0	0	0	0	0	0	1.8103	11.3181	19.0504	19.2211	18.2537	15.408	12.9026	10.9343	10.1976	10.6627	10.6444	11.7913	13.0546	13.7844	14.1552	14.9955	15.0136	14.628	14.9101	14.8969	14.5884	15.0876	14.8811	14.3708	13.8106	13.2144	11.9988	11.3388	9.91247	8.42127	7.03808	5.99125	4.66445	3.71514	3.12306	2.60221
481.06	11.5161	7.04856	0	0	3.59556	1.20879	3.9378	0	0	0	0	0	0	1.63545	11.2054	18.7023	19.4162	17.6116	15.3626	12.8948	10.7089	10.3534	10.1802	10.3157	11.2803	12.7022	13.4384	14.0925	14.7239	14.7466	14.3996	14.616	15.0828	14.2518	15.1092	14.5675	14.2636	13.9636	13.2277	11.9131	11.0414	9.87771	8.33485	6.92839	5.96788	4.55006	3.71457	3.145	2.61815
481.96	9.9356	0	0	0	0	0.813785	4.80824	0	0	0	0	0	0	1.39476	11.235	18.1537	19.2486	17.3982	15.1477	13.0715	10.6081	10.2103	10.1705	10.2569	10.9573	12.154	12.9896	14.0346	13.7384	14.4098	14.4643	14.3513	14.8229	14.2829	14.8447	14.3945	14.2041	13.845	13.2115	11.8422	10.923	9.93195	8.15886	6.89286	5.93641	4.61273	3.65162	3.06726	2.57206
483.03	0	0	0	0	0	0	4.26185	0	0	0	0	0	0	1.29102	11.3212	17.9347	18.5511	16.9842	15.1274	12.763	10.5852	9.48673	10.0349	10.1424	11.0147	12.114	13.0934	13.6206	14.0585	14.2953	14.496	14.1564	14.5081	14.3444	14.6939	14.4032	14.094	13.6824	13.0001	11.7871	10.7986	9.82925	8.21484	6.84472	5.92119	4.73129	3.78739	3.09254	2.58808
483.93	0.443497	8.06429	0	0	0	0	4.58534	0.0660677	0	0	0	0	0	1.24798	10.7517	17.7554	18.2614	16.7771	15.2199	12.1356	10.3456	9.69511	9.93331	10.0215	10.9798	12.0069	12.9146	13.1182	13.708	13.7377	14.148	14.0347	14.2142	14.2162	14.6531	14.3657	13.7658	13.289	12.6263	11.6015	10.9431	9.87613	8.29412	6.95002	5.93979	4.80552	3.73375	2.98163	2.6271
485	0	6.61199	0	0	0	0.826913	4.40381	0.366859	0	0	0	0	0	1.17918	10.3927	18.0456	17.8148	16.8027	15.0319	11.8915	10.1059	9.55382	9.72479	9.64259	10.5817	11.7246	12.7068	12.8334	13.5913	13.6325	13.715	14.0635	14.2167	13.7215	14.2629	13.8551	13.4271	13.2721	12.4189	11.3888	10.878	9.71351	8.24315	6.79117	5.98882	4.72646	3.75532	3.06726	2.63845
486.06	0	0	0	0	0	1.09703	4.24355	0.780484	0	0	0	0	0	1.01232	10.426	18.2326	17.6411	16.8664	14.6816	12.3069	10.1782	9.13951	9.71567	9.58472	10.8648	11.4293	12.0842	12.4547	12.9647	13.5746	13.479	13.8198	13.9185	13.4383	14.2554	13.7737	13.3617	13.4399	12.3732	11.465	10.712	9.90985	8.27954	6.78004	5.96322	4.67466	3.76023	3.15147	2.54466
486.96	0	0	0	0	0	0	2.86606	1.29225	0	0	0	0	0	1.02315	10.5231	18.2871	17.5946	16.6082	14.4599	12.3099	9.99564	8.68121	9.28166	9.47995	10.7369	11.4869	11.749	12.4593	12.7868	13.2609	13.4946	13.7356	13.7613	13.3242	14.0124	13.7198	13.3052	13.5569	12.6194	11.4463	10.7438	9.68939	8.22825	6.79153	5.88788	4.71383	3.88365	3.23002	2.55896
488.03	7.16372	0	0	0	0	0	2.63581	2.03653	0	0	0	0	0	1.08281	10.208	18.119	17.7653	16.0569	14.4659	11.9082	9.43435	8.77196	8.93264	9.45042	10.1629	11.5849	11.6103	12.6367	12.4956	13.0671	13.3685	13.5881	13.7421	13.1747	14.0817	13.6453	13.3578	13.1319	12.4211	11.3847	10.7693	9.66939	8.30246	6.99993	5.85128	4.75646	3.85243	3.10957	2.63088
488.93	0	1.71707	2.04246	0	0	0	3.32048	2.31918	0	0	0	0	0	1.43003	9.85647	17.6134	17.5838	15.8807	14.5278	11.8372	9.16869	8.54622	8.56319	9.12338	9.47186	11.2174	11.3732	12.3382	12.8843	12.9035	12.972	13.2091	13.5051	13.1133	13.4996	13.3573	13.155	12.6823	12.272	11.1946	10.5822	9.49616	8.31075	7.02959	5.85837	4.68968	3.75817	3.08844	2.7334
490	0	10.9983	0	0	0	0	3.41207	0.797495	0	0	0	0	0	1.43612	9.99449	17.4742	17.2952	15.9397	14.2446	11.8958	9.17215	8.48451	8.68145	9.02729	9.72745	10.8372	11.0738	11.9394	12.7255	12.6727	12.8383	12.8345	13.1045	12.9103	13.2873	13.2775	13.0052	12.7482	11.8899	11.1825	10.1616	9.40748	8.34581	6.90039	5.84131	4.70859	3.74134	3.14898	2.7154
491.06	0	3.08526	0	0	0	0	2.93407	0.447663	0	0	0	0	0	1.09853	9.79854	16.9494	16.9672	15.9463	13.9049	11.8597	9.14157	8.28168	8.78154	8.61734	9.935	10.7462	10.9992	11.4056	12.0669	12.2161	12.7046	12.783	12.8801	12.9113	13.0306	13.0559	12.8349	12.7564	11.8262	11.0168	10.2984	9.15561	8.07355	6.75023	5.69645	4.6833	3.78262	3.21341	2.73397
491.96	8.74828	0.452326	0	0	0	0	2.47148	1.7749	0	0	0	0	0	0.60332	9.96803	16.494	16.9396	15.6758	13.6881	11.7389	8.91389	8.20475	8.99503	8.25775	9.76299	10.437	10.7863	11.5245	11.5475	12.3056	12.4147	12.6669	12.8538	12.6517	12.9922	12.9736	12.8456	12.6324	11.5443	10.9504	10.4658	9.09417	7.97355	6.95923	5.63697	4.66123	3.87844	3.23535	2.68004
493.03	9.25624	0	0	0	0.597867	0	2.03944	2.51966	0	0	0	0	0	0.52907	9.67735	16.0798	16.873	15.468	13.6393	11.4573	9.01282	8.01363	8.53113	8.17885	9.4899	10.0514	10.4688	11.6312	11.3077	12.2888	12.1293	12.3835	12.6585	12.6973	12.7882	12.9109	12.5664	12.2605	11.4875	10.8989	10.3655	9.09358	7.93191	6.84397	5.56407	4.60062	3.83122	3.26699	2.74845
493.93	4.77236	0	0	0	0	0	1.61756	1.67737	0	0	0	0	0	0.493616	9.70092	16.1108	16.7124	15.3423	13.1762	10.915	9.054	7.89142	8.34517	8.56821	9.11172	10.1061	10.3089	11.6219	11.1718	11.8857	12.3699	12.1383	12.4415	12.5621	12.6881	12.8717	12.29	12.1272	11.5433	10.9219	10.0998	9.02168	7.84349	6.79714	5.59629	4.54883	3.73636	3.26871	2.86108
495	0	0	0	1.03226	0	0	1.13255	0.526354	0	0	0	0	0	0.468202	9.42496	15.8645	16.1289	15.0219	12.9728	10.702	8.95231	7.8817	7.73949	8.43087	8.52631	9.74999	10.5427	10.8564	11.1015	11.5752	11.8729	11.9443	12.0906	12.3379	12.5057	12.5482	12.1058	11.7296	11.474	10.6244	10.0279	9.12327	7.78637	6.72345	5.57855	4.47884	3.71265	3.32647	2.84912
496.06	0	0	0	4.82575	0	0	0.895209	0.878941	0	0	0	0	0	0.58318	9.38767	15.4243	15.8971	14.5375	12.8256	10.547	8.57637	7.89469	7.69409	7.8968	8.46779	9.70959	10.1229	10.7306	11.1277	11.2939	11.5696	11.7548	11.5917	11.7065	12.3827	12.1431	11.9002	11.7599	11.3799	10.506	9.91055	9.09009	7.78147	6.8224	5.62277	4.43154	3.74947	3.39531	2.82301
496.96	0	0	0	0	0	0.0660532	0.024432	0.877772	0	0	0	0	0	0.45802	8.96008	15.3111	15.3456	14.7916	12.8084	10.4116	8.36156	7.72495	7.4038	7.21412	8.59326	9.42077	9.78886	10.3621	10.9357	11.0963	11.269	11.6477	11.2263	11.5318	12.259	11.7744	11.8477	11.6803	11.0582	10.1858	9.68434	8.84222	7.57948	6.55342	5.64309	4.45938	3.87163	3.36989	2.89787
498.03	0	0	0	0	0	0.120338	0	0.56907	0	0	0	0	0	0.654989	8.90952	15.4795	15.3595	15.0583	12.6887	10.1289	8.14435	7.27669	7.66331	7.37457	8.92006	9.48614	9.44263	9.97034	10.7853	10.8186	11.3956	10.9999	11.3317	11.5113	12.1538	11.8554	11.768	11.9106	10.84	10.2075	9.48809	8.59975	7.54547	6.64188	5.68424	4.45562	3.78349	3.33374	2.94223
498.93	0	2.71334	0	0	0	0	0	0.242184	0	0	0	0	0	0.527358	8.97078	15.3682	15.1624	14.522	12.5738	9.76871	8.25079	7.15945	7.42558	7.43634	8.45718	9.04132	9.14951	9.90968	10.4304	10.7197	11.1202	10.6748	11.3328	11.3887	11.5875	11.5666	11.5338	11.7429	10.6033	9.98136	9.43549	8.63451	7.69532	6.75426	5.64944	4.60015	3.66452	3.29668	2.83324
500	0.318426	4.06093	0	0	1.12088	0	0	0.191556	0	0	0	0	0	0.63648	8.91209	14.6515	15.1955	13.6672	12.3559	9.62355	8.18945	7.09164	7.54833	7.50187	8.29501	8.87359	9.29527	10.2019	9.84293	10.3617	11.1537	10.5535	11.0184	11.093	11.4251	11.3055	11.3551	11.5402	10.5642	9.93567	9.41727	8.60776	7.71917	6.78248	5.58134	4.61642	3.55011	3.3435	2.84326
501.04	1.32644	4.56085	0	0	2.43589	1.89241	0	0.856107	0	0	0	0	0	0.272868	8.66553	14.2729	14.8048	13.4759	12.1723	9.5344	8.13717	7.18702	7.1434	7.13397	8.11842	8.56998	9.40645	9.99128	9.696	10.0567	10.9232	10.9949	10.9658	11.0321	11.3634	11.2181	11.1896	10.7628	10.466	9.80916	9.32111	8.54897	7.4491	6.6216	5.5996	4.62385	3.70598	3.42988	2.99208
501.94	0	1.80526	0	0	0	0.92386	0.336246	0.835378	0	0	0	0	0	0.728146	8.13058	14.1312	14.6352	13.6256	11.8178	9.47644	7.79449	7.22534	7.33663	6.97412	7.93493	8.50954	9.48181	9.45239	9.73859	10.0807	10.7188	10.8124	10.7823	11.0409	11.2951	11.2769	11.0324	10.5825	10.2561	9.63386	9.35716	8.46071	7.39101	6.55805	5.58243	4.6164	3.80271	3.51225	3.00684
502.98	0	3.59212	0	0	0	0.28159	0.5569	0.433138	0	0	0	0	0	0.629397	7.89619	14.2262	14.0443	13.4481	11.6715	9.49091	7.53952	6.95687	6.83721	6.75947	7.35644	8.46059	9.17895	9.21816	9.82811	9.94284	10.3796	10.4262	10.6002	10.6006	10.9673	10.8075	10.7647	10.4502	10.257	9.45017	9.20327	8.35631	7.2405	6.40024	5.53802	4.6323	3.85398	3.40392	3.03707
504.02	0	10.3925	0	1.06181	0	0.587595	0.746248	0	0	0	0	0	0	0.456767	7.75559	14.1991	13.9046	13.2698	11.4188	9.38407	7.49633	6.48197	6.67726	6.44718	6.99277	8.04437	8.97211	9.0471	9.46709	9.7133	10.0932	10.2693	10.4186	10.1396	10.6803	10.5838	10.8803	10.5704	10.2994	9.3351	9.00977	8.3276	7.25122	6.32691	5.51622	4.68474	3.85663	3.37292	3.04211
505.07	0	4.8524	1.49892	0	0	1.28174	1.25744	0.0108638	0	0	0	0	0	0.0945194	8.14692	14.0811	13.8146	13.1335	11.3959	9.11347	7.42799	6.02291	6.41572	6.42103	7.32707	7.78554	8.64641	9.02156	9.17316	9.54225	9.58112	10.1319	10.2024	9.93542	10.5423	10.5447	10.8053	10.4704	10.0433	9.24906	8.8244	8.14081	7.16826	6.19506	5.56985	4.70272	3.80025	3.43068	3.10562
505.97	0	0.370366	4.37809	0.788376	0	1.33222	1.49739	0.117331	0	0	0	0	0	0.211583	8.09724	13.3021	13.7781	12.8689	10.8555	8.95321	7.27294	5.94761	6.42727	6.42046	7.47647	7.7455	8.36242	8.80076	8.91123	9.22101	9.75342	9.96512	9.79781	10.0639	10.2367	10.4295	10.5233	10.4579	9.63467	9.09129	8.80522	7.97859	7.03603	6.20829	5.50512	4.67027	3.76442	3.52984	3.17548
507.01	0	0	0	1.86255	0	1.25246	1.38903	0	0	0	0	0	0	0.283162	7.74972	12.8231	13.3655	12.4021	10.7364	8.96286	6.88813	5.94202	6.28484	6.50348	7.34867	7.68426	8.40209	8.89098	8.76941	8.86583	9.61664	9.51849	9.69365	9.7676	10.2517	10.4612	10.1887	10.1352	9.59259	9.11504	8.62254	7.77508	6.85816	6.10396	5.41668	4.62247	3.80504	3.44703	3.22256
508.05	0	0.0709524	0	0	0	1.28679	1.46277	0	0	0	0	0	0	0.146372	7.41099	13.0707	13.1294	12.0601	10.4886	8.79036	6.94198	5.94952	6.18276	6.51096	6.8137	7.29773	7.98602	8.6076	8.66169	8.71589	9.12676	9.45947	9.67466	9.66068	9.98024	10.4221	9.90778	9.81787	9.5727	8.90714	8.43862	7.79547	6.72513	6.11067	5.38534	4.65576	3.88589	3.48503	3.24573
508.95	2.00872	0.510939	0	0	0	2.12463	0.94001	0	0	0	0	0	0	0	7.29472	12.9884	13.0009	12.1547	10.3587	8.63211	6.77939	5.74828	6.28679	6.46549	6.84563	7.39557	8.14173	8.21115	8.51444	8.72326	8.74521	9.18373	9.33102	9.42983	9.73677	10.2281	9.6312	9.59911	9.18387	8.9037	8.2385	7.79848	6.64215	6.14816	5.48155	4.63865	3.83531	3.53934	3.24119
510	8.96347	3.94929	0	0	0	2.62125	1.28784	0	0	0	0	0	0	0.0179405	7.41809	12.3205	13.0235	12.0761	10.04	8.48501	6.89231	5.49026	6.095	6.18123	6.85845	7.21131	7.93477	7.70738	8.4129	8.41182	9.05339	9.20298	9.15234	9.38358	9.38362	9.91755	9.53342	9.60118	8.90585	8.71382	8.14067	7.71366	6.62858	6.08342	5.5573	4.55795	3.8454	3.59131	3.23889
511.06	10.5991	0	0	0	0	2.58986	0.92485	0	0	0	0	0	0	0.0318534	7.15835	12.0787	12.6478	11.8452	9.94723	8.05721	6.61154	5.31908	5.9358	5.62451	6.59991	6.93818	7.90675	7.85123	8.21302	8.3913	8.90584	8.95649	9.15248	8.91752	9.33749	9.70144	9.55192	9.50072	8.99299	8.55026	8.00433	7.59274	6.78645	5.9829	5.52477	4.62404	3.86896	3.5289	3.15049
511.96	7.61782	0	0	0	3.2046	0.911326	1.99025	0	0	0	0	0	0	0	6.84901	11.8317	12.3529	11.6269	9.71378	7.88181	6.34984	5.35518	5.3814	5.54844	6.07393	6.47487	7.53986	7.81906	7.75104	8.39653	8.75582	8.66131	8.9462	8.85296	9.33951	9.41351	9.36407	9.2318	8.9858	8.29646	8.15912	7.43018	6.59066	5.88933	5.32193	4.59166	3.91778	3.46904	3.15918
513.03	0	0	0	5.20837	0	0.633854	2.24864	0	0	0	0	0	0	0	6.69073	11.5023	12.2255	11.5543	9.55844	7.81682	5.84521	5.29875	5.24385	5.41513	6.09355	6.7617	7.77486	7.72737	7.60885	8.25158	8.4472	8.47483	8.65285	8.67451	9.11279	9.01801	9.07682	8.89826	8.81073	8.31492	8.09805	7.38378	6.54281	5.91913	5.27005	4.6534	3.89429	3.55505	3.17829
513.93	0	0	3.95203	2.01901	0	0.670849	2.86601	0	0	0	0	0	0	0	6.63308	11.2714	12.0432	10.9169	9.28918	7.92605	5.85413	5.29586	5.35397	5.66622	6.32656	6.70146	7.17526	7.33256	7.55022	7.96374	8.01942	8.71151	8.77465	8.59897	8.94417	8.81514	8.98775	8.93409	8.57379	8.10404	8.02303	7.27511	6.42829	5.89061	5.36508	4.66941	3.84452	3.54713	3.26386
515	0	1.69349	3.21074	0	0	0.596872	2.06572	0	0	0	0	0	0	0	6.59453	11.5286	11.4835	10.5499	9.14771	7.63153	5.87957	4.96589	5.39147	5.5927	6.55594	6.63036	6.74497	7.23586	7.69079	7.75891	7.63495	8.68096	8.49972	8.23667	8.651	8.7388	8.85258	8.7581	8.43482	7.9357	7.7212	7.12282	6.42646	5.86312	5.41926	4.64011	3.88552	3.57301	3.31116
516.06	0	1.37214	0	0	0.974914	1.18248	1.6376	0	0	0	0	0	0	0	6.21537	11.5174	10.828	10.6999	8.82125	7.31877	5.77502	4.91984	5.04128	5.35788	6.0871	6.30947	6.4714	7.12409	7.67713	7.75451	7.80032	8.31459	8.09197	8.15044	8.69601	8.89929	8.56761	8.36956	8.21824	8.01624	7.54575	7.05612	6.32712	5.8777	5.28923	4.48761	4.00793	3.60526	3.41381
516.96	0	0	0	0	0.371294	0.523526	1.09149	0	0	0	0	0	0	0	5.65434	11.1997	10.6221	10.6398	8.73039	7.21245	5.54151	4.64142	5.04611	5.01049	5.61495	5.971	6.46511	7.17171	7.71763	7.38306	7.89693	7.83366	7.71614	8.22336	8.65394	8.67722	8.34536	8.12964	8.08604	7.83552	7.50919	6.90821	6.24377	5.84829	5.24881	4.55101	4.02108	3.74502	3.43096
518.03	1.59656	0	0	0	0	1.67231	0.680377	0	0	0	0	0	0	0	5.48038	10.5283	10.6065	10.1872	8.8142	7.0571	5.53825	4.81437	5.11461	4.97813	5.44168	5.80825	6.34245	7.10041	7.39223	7.33388	7.66039	7.84067	7.81579	8.0362	8.55397	8.1378	8.20108	8.38221	7.9829	7.43795	7.37885	6.81355	6.17016	5.86327	5.20561	4.57559	4.02738	3.70807	3.40788
518.93	7.14758	0.894999	0	0	0	1.87891	0.930841	0	0	0	0	0	0	0	5.66609	9.87465	10.5884	9.89203	8.5941	6.76095	5.61573	4.44962	5.11283	4.91976	5.31456	5.7482	6.38272	6.83974	7.0801	7.2858	7.52381	7.77415	7.49358	7.92726	8.52143	7.7857	8.24726	8.53824	8.12065	7.36449	7.28053	6.75356	6.13579	5.70005	5.1535	4.55942	4.05484	3.78477	3.39965
520	6.81618	3.5793	4.01638	0	0	0.392268	1.25759	0	0	0	0	0	0	0	5.78875	9.84012	10.3929	9.62094	8.11762	6.43446	5.47356	4.23055	4.56472	4.56856	4.95398	5.72371	6.19734	6.53034	6.73457	7.30567	7.33742	7.49855	7.31483	7.87795	8.58108	7.98253	8.16837	8.31888	7.91234	7.55008	7.19969	6.86007	6.10764	5.52064	5.0678	4.48997	4.16244	3.79315	3.41287
521.04	2.27642	0	6.94821	0	0	0	1.50527	0.0718947	0	0	0	0	0	0	5.30669	9.59377	10.0114	9.21214	7.86319	6.68095	5.12444	4.3194	4.41111	4.45515	4.81602	5.41895	5.78781	6.23918	6.48391	6.99539	6.95259	7.17838	7.18291	7.62357	8.2621	7.94725	7.83944	7.88956	7.51875	7.48112	7.2223	6.79167	5.84087	5.53643	5.01159	4.47634	4.14472	3.75107	3.43187
521.94	0	0	3.16775	0	0	0	1.24213	0	0	0	0	0	0	0	5.13594	9.608	9.91383	9.15698	7.91331	6.75617	4.89301	4.67232	4.27624	4.35975	4.84824	5.18025	5.56877	6.13169	6.46664	6.7782	6.69522	7.07254	7.26907	7.24085	7.53781	7.65384	7.5295	7.52748	7.28964	7.07405	7.03833	6.45154	5.82051	5.5995	5.04475	4.418	4.16259	3.74608	3.52842
522.98	0	0	0	0	0	0	1.20656	0	0	0	0	0	0	0	5.0098	9.40571	9.62438	9.25271	7.85712	6.58095	4.77364	4.43452	4.33073	4.54463	4.67919	5.02954	5.45515	6.03879	6.22935	6.66627	6.38593	7.04133	7.28696	7.06434	7.24206	7.31815	7.45161	7.43541	7.38048	6.85373	6.7971	6.27368	5.77252	5.47072	5.16034	4.44076	4.06793	3.86406	3.67025
524.02	0	0	0	0.201025	0	0	1.02796	0	0	0	0	0	0	0	5.08072	9.29036	9.42806	9.1353	7.46913	6.42198	4.62526	4.03403	4.03726	4.23246	4.65865	5.12514	5.41278	5.90654	6.10866	6.29691	6.45446	6.83912	7.09095	7.04057	7.38805	7.1332	7.28595	7.23178	7.22806	6.83793	6.67782	6.19829	5.83992	5.3126	5.1715	4.46387	3.99129	3.8827	3.67294
525.07	0	0	0	0.280594	0	0	1.05161	0	0	0	0	0	0	0	4.98549	8.82489	9.28756	9.07732	7.30131	6.18001	4.52123	4.02097	3.9351	4.34659	4.48541	5.45857	5.72305	5.89774	5.94175	6.03027	6.37801	6.45392	6.75237	6.692	7.25089	7.0654	7.1268	6.93267	6.9085	6.79351	6.59268	6.20508	5.71043	5.38392	5.09802	4.50034	3.93334	3.83707	3.65862
525.97	0	0	0	0	0	0	0.722564	0	0	0	0	0	0	0	4.85672	8.74894	9.09522	8.79808	7.22012	5.95439	4.64109	4.15124	3.85761	4.45599	4.1968	5.41765	5.26317	5.74554	6.25135	6.03192	6.42673	6.40839	6.41912	6.60223	6.96267	7.05861	6.70527	6.77411	6.95	6.51106	6.33018	6.11209	5.5848	5.3561	4.96131	4.41419	4.10243	3.81054	3.74397
527.01	0	6.48784	0	0	0	0	0.444094	0.202798	0	0	0	0	0	0	4.45231	8.42241	8.74522	8.46462	7.21486	5.612	4.73373	4.06027	3.85985	4.67824	3.92215	5.03327	5.13884	5.89437	6.06317	6.065	6.25092	6.5315	6.30872	6.64177	6.84295	7.08392	6.59482	6.83784	6.86958	6.27803	6.04924	5.85208	5.41954	5.31599	4.8849	4.40543	4.15676	3.78421	3.76312
528.05	0	3.79019	0	0	0	0	0	0	0	0	0	0	0	0	4.24525	8.46055	8.30864	8.18449	6.96557	5.57002	4.48576	3.78259	3.94027	4.32579	4.10599	4.66934	4.95412	5.58518	5.57181	5.97	6.15649	6.52758	6.07353	6.67295	6.94482	6.82009	6.49091	6.75575	6.79618	6.26343	6.12497	5.67751	5.47892	5.24817	4.78184	4.38591	4.16079	3.8042	3.64159
528.95	0	1.67111	0	0	0	0.398723	0.724867	0	0	0	0	0	0	0	3.95954	8.31852	8.55977	8.17425	6.80483	5.49856	4.19215	3.73786	3.94948	4.08174	4.43572	4.77143	5.19483	5.10924	5.0768	5.62293	5.99052	5.94193	6.13216	6.28711	6.79384	6.60204	6.62073	6.59918	6.61796	6.30182	6.27777	5.61535	5.41062	5.16063	4.8141	4.33896	3.99214	3.82502	3.66294
530	0	0	0	2.02102	1.56532	0	0.981113	0	0	0	0	0	0	0	3.57345	8.47412	8.36087	8.03837	6.35761	5.50018	4.15548	3.80921	3.56454	3.91842	4.74423	4.65054	4.72251	4.94705	5.14729	5.68505	5.75403	5.74308	6.13254	5.85318	6.58147	6.40372	6.5752	6.57766	6.52157	6.44506	6.1798	5.77962	5.23011	4.99346	4.75204	4.25208	3.89509	3.84374	3.70758
531.04	0	0	0	0	2.08613	0	1.06415	0.320086	0	0	0	0	0	0	2.28127	8.10677	8.09365	7.74338	6.20573	5.30149	4.19438	3.95359	3.19527	3.59698	4.52756	4.61974	4.60205	5.08956	5.49195	5.64502	5.74051	5.64011	6.02091	5.78812	6.35055	6.20904	6.54105	6.53691	6.25253	6.15706	5.90913	5.708	5.20662	4.8458	4.68442	4.2768	3.81777	3.88904	3.7619
531.94	0	0	0	0	4.07918	0	1.12505	0.614091	0	0	0	0	0	0	0	8.08197	7.70874	7.61901	6.23983	5.35809	4.08888	3.57066	3.14624	3.34315	3.93491	4.58281	4.51598	5.20624	5.48447	5.47294	5.78049	5.61221	5.85149	5.8348	6.06167	5.94323	6.28291	6.44193	5.98236	5.89937	5.85378	5.51051	5.1951	4.96654	4.61404	4.23569	3.8742	3.90158	3.64266
532.98	0	0	0	0	0.520649	1.39457	2.07915	0.75942	0	0	0	0	0	0	0	7.645	7.57548	7.67421	6.43338	5.26618	3.87336	3.42362	3.51878	3.41821	3.4961	4.68691	4.49604	4.98249	5.20042	5.03265	5.36811	5.4528	5.60351	5.75072	5.84665	5.78985	5.91477	6.25712	5.8192	5.50244	5.71379	5.3361	5.09546	4.90112	4.58438	4.18989	3.88917	3.83687	3.65873
534.02	0	0	0	0	0	2.40728	2.66037	1.68092	0.839334	0	0.66265	0.780147	0.549756	0	0	7.56089	7.56518	7.51566	6.11729	4.99077	3.61145	3.26537	3.48763	3.47274	3.45581	4.1572	4.37566	4.92273	4.67569	4.86853	5.02849	5.35938	5.43292	5.41245	5.5791	5.94788	5.84038	6.16491	5.60712	5.63795	5.4698	5.27106	4.94501	4.83697	4.47536	4.17834	3.87	3.68889	3.66548
535.07	0	0	0	0	0	3.18714	2.69793	2.83841	2.43262	0.916514	1.46685	1.7464	2.27668	0	0	7.14306	7.86763	6.97411	5.84527	4.79096	3.64347	3.30624	3.20158	3.24352	3.41806	4.34582	4.48297	4.83238	4.51862	4.84608	5.07047	5.22184	5.42571	5.2346	5.50453	5.72976	5.90124	5.94559	5.53923	5.59958	5.23368	5.25247	4.94915	4.5301	4.46361	4.13174	3.8693	3.62324	3.74378
535.97	0	0	0	0	0	5.07783	4.06731	4.69885	4.35945	2.47044	2.9635	3.67377	3.99493	0	0	7.31832	7.47944	6.81179	5.9147	4.72849	3.79097	3.12374	2.90561	3.29303	3.38071	4.42534	4.67273	4.65686	4.41144	4.57774	5.24593	4.95501	5.51804	5.16782	5.52937	5.53555	5.87335	5.77551	5.40547	5.57462	5.40726	5.04363	4.9519	4.56656	4.43338	4.02908	3.82093	3.54806	3.66253
537.01	0	0	0	0	2.98316	5.9471	6.25831	6.67812	6.85427	4.17357	4.67405	5.57472	6.27501	0	0	7.38902	7.09423	6.53203	5.85706	4.54885	3.77763	3.11788	3.09912	3.43764	3.37241	4.25877	4.18684	4.49411	4.37907	4.60816	4.98014	4.882	5.16042	5.14175	5.40192	5.33096	5.70267	5.80603	5.39651	5.29798	5.52363	4.9348	4.82817	4.49418	4.29997	3.98405	3.74885	3.68541	3.49725
538.05	0	0	0.432498	0	0	5.76388	8.79353	9.79355	9.49102	6.83287	6.88799	7.55104	8.74529	0	0	8.03174	6.79739	6.35172	5.65214	4.36154	3.55722	2.84655	3.13127	3.25526	3.29314	3.80371	3.93639	4.59467	4.31151	4.51656	4.8343	4.8019	4.84275	4.95885	5.05267	5.38352	5.40966	5.82606	5.18131	5.28023	5.39521	4.88444	4.73669	4.52023	4.22678	3.96292	3.76024	3.66659	3.40234
538.95	0	0	0	0	0	7.38327	10.3031	13.3277	13.3335	10.4602	9.83767	10.0665	11.9647	0	0	8.62646	6.95189	6.22078	5.20305	4.40132	3.54864	2.67793	3.22645	2.99906	3.4197	4.07993	4.22853	4.44341	4.476	4.4545	4.58305	4.80503	4.75242	4.94697	5.10516	5.25587	5.22155	5.61279	4.97983	5.1731	5.17649	4.92245	4.73202	4.35428	4.29793	3.92328	3.75896	3.59499	3.44861
540	0	0	0	0	0	9.70278	12.9044	17.4645	18.6011	15.1716	13.7732	14.2496	16.3386	0	0	8.70705	6.52175	6.21438	5.0215	4.37069	3.49808	2.63553	3.08442	2.9672	3.62446	4.10672	4.23941	3.96894	4.25361	4.19936	4.24963	4.90027	4.81164	4.98451	5.12432	5.20143	5.13729	5.27756	4.99682	4.96468	5.0647	4.83939	4.6142	4.33453	4.33671	3.86732	3.62236	3.50625	3.50284
541.04	0	6.46454	0	3.20678	1.95078	12.4457	16.4199	21.3011	24.605	19.9715	18.9418	20.3064	21.8625	7.44974	0	7.91027	6.64302	6.21521	4.99797	4.26706	3.52452	2.90816	2.86838	3.05205	3.52518	4.00105	3.70027	3.43671	4.22114	4.0711	4.0599	4.79636	4.83578	4.78756	5.04031	5.05885	5.14833	5.10399	5.15539	4.75692	4.91565	4.8444	4.36685	4.26615	4.19744	3.82053	3.54601	3.56362	3.42016
541.94	0	4.67119	0.87278	14.2578	4.23191	16.668	20.7449	26.5884	30.631	25.6955	24.5087	26.0053	27.5342	22.0582	0	4.42141	6.52331	6.13874	5.05003	4.20674	3.29748	2.96788	2.54339	3.20568	3.08923	3.58303	3.4517	3.9131	4.15193	3.98846	4.07592	4.50417	4.73177	4.58726	4.76327	4.91746	4.92868	5.2052	5.15332	4.76837	4.71878	4.6927	4.14918	4.17813	4.02107	3.73498	3.46751	3.57581	3.38866
542.98	0	0	1.79954	12.289	7.17179	20.4501	24.4645	32.365	36.3276	31.8888	30.0994	31.9764	33.5894	32.8666	0	0	6.37288	6.08245	4.72298	4.02067	3.12734	2.85397	2.59355	2.95751	2.80489	3.26237	3.38104	4.22568	4.05392	3.9931	4.2232	4.17283	4.47405	4.48313	4.68643	4.79532	4.80059	5.24334	4.82692	4.55414	4.63382	4.46911	4.20878	4.01927	3.81743	3.6496	3.43519	3.43298	3.34217
544.02	0	2.08234	4.18452	15.5236	10.6135	22.6984	28.6886	39.5692	43.2605	39.943	35.4802	36.8525	39.194	42.7622	0	0	6.24934	5.59709	4.51077	3.85263	2.61301	2.6451	2.88735	2.60742	2.91043	2.94168	3.54037	4.16529	3.887	4.02142	4.45041	4.17917	4.37726	4.47019	4.69037	4.76871	4.89515	4.97703	4.59357	4.39174	4.47512	4.29438	4.15602	3.90456	3.79126	3.55744	3.33093	3.33037	3.26124
545.07	14.3241	15.7959	0	11.0553	20.5208	26.9771	32.8582	45.0252	50.7019	46.875	40.5632	42.2071	45.7656	50.8543	0	0	6.26574	5.31546	4.59124	3.67061	2.58704	2.62041	2.88218	2.62079	2.82715	3.11105	3.47762	3.81729	3.62113	4.24586	4.47468	3.8998	4.21354	4.28306	4.71867	4.65787	4.76361	4.84194	4.48148	4.23816	4.49621	4.24119	4.11834	3.87657	3.71183	3.51019	3.23842	3.15441	3.16869
545.97	20.1151	16.1646	0.0485751	17.692	18.8709	30.6137	37.9801	50.7108	57.8461	53.8991	46.2533	47.4593	52.1718	57.1971	0	0	5.99519	5.00624	4.73756	3.58435	2.54344	2.63265	2.61652	2.82945	2.97242	3.38774	3.53002	3.67245	3.57763	4.13933	4.10141	3.83104	3.95251	4.21143	4.45064	4.44201	4.59805	4.72292	4.41042	4.304	4.35098	4.17926	3.97501	3.85574	3.65805	3.5009	3.14867	3.19672	3.07591
547.01	13.738	13.6083	7.42575	13.1327	18.8853	32.0822	42.1513	55.1188	62.6089	58.9212	50.9506	53.0094	57.6862	62.4258	0	0	5.92906	5.05151	4.76487	3.49056	2.62862	2.63468	2.37009	2.58887	2.75318	3.55159	3.15068	3.55308	3.36383	3.66878	3.86482	3.7933	3.79864	4.26207	4.15268	4.21113	4.51684	4.62518	4.30016	4.28695	4.16157	4.00831	4.01086	3.77035	3.49508	3.32868	3.09484	3.13708	3.01247
548.05	9.50677	8.2147	8.94459	17.0097	18.4368	32.2895	46.2256	58.6723	67.2488	62.8189	54.8456	56.7823	61.4044	66.4744	0	0	5.66922	4.99939	4.59506	3.51893	2.57408	2.55329	2.2647	2.37911	2.56361	3.34	3.1812	3.42463	3.49469	3.40745	3.91876	3.94138	3.9108	4.20163	4.3117	4.22366	4.47186	4.17503	4.25135	4.17407	3.97967	3.96554	3.89548	3.69583	3.51986	3.27179	3.06345	3.08017	3.01935
548.95	9.59574	16.1822	10.7075	17.6447	26.1284	36.2688	46.8667	60.5588	70.0565	64.3179	56.5941	59.4463	63.9918	69.203	2.66652	0	5.19389	4.73222	4.45705	3.40089	2.56674	2.45038	2.3339	2.39731	2.456	2.9534	3.09224	3.314	3.46334	3.69545	3.88258	3.94684	3.8565	4.09357	4.45104	4.19065	4.27017	4.18923	4.26122	3.96318	3.9237	3.85466	3.76557	3.67554	3.42593	3.14442	2.93059	2.98823	3.08168
550	11.7344	12.9186	21.6263	21.4318	27.4124	38.6024	47.8133	63.6187	71.9907	66.9875	58.8008	61.9906	65.8945	70.6493	27.8155	0	4.37437	4.47959	4.14289	3.31169	2.58912	2.24378	2.29802	2.67976	2.58137	2.72011	3.23083	3.29778	3.61202	3.71967	3.84888	3.85286	3.59832	3.94147	4.04071	4.13809	4.10404	4.03728	4.30753	3.98194	3.90828	3.74141	3.62581	3.6088	3.4098	3.1064	2.94974	2.94588	3.02216
551.04	7.98946	13.5549	25.0667	24.4039	25.0421	39.5511	48.551	67.3143	74.1882	69.2313	60.4651	63.2639	67.384	72.563	46.7391	0	3.68822	4.65496	4.00205	3.19821	2.52452	2.18188	2.45519	2.64937	2.8616	2.76837	3.17619	3.24591	3.1976	3.36335	3.60011	3.67815	3.44333	3.72298	3.74729	3.96253	3.95026	4.21368	4.09015	4.03227	3.82954	3.62045	3.47284	3.42447	3.31886	2.99051	2.94749	2.90866	2.9719
551.94	11.3002	4.66083	25.1401	19.8256	22.721	39.238	50.0038	67.3047	75.7751	71.7202	61.7055	63.2984	69.3552	74.8364	55.811	0	1.37053	4.77787	3.72725	3.32659	2.63292	2.09949	2.22512	2.33935	2.79218	2.78763	3.23368	3.1466	2.92484	3.20144	3.47727	3.50724	3.35729	3.38428	3.63241	3.84671	3.75689	3.97016	3.91426	3.94072	3.72101	3.54971	3.3635	3.34048	3.25034	2.95875	2.9383	2.86653	2.84333
552.98	17.9168	13.4614	20.2085	19.8798	23.4005	39.6985	50.8627	66.066	77.4241	73.3581	62.6198	64.1595	70.1341	77.0059	60.6944	0	0	4.54523	3.70067	3.10473	2.31679	2.11942	2.31973	2.09073	2.65715	2.95304	3.06316	3.04198	2.80679	3.13107	3.19473	3.45761	3.33494	3.39076	3.61233	3.82848	3.63936	3.89456	3.63327	3.65502	3.62628	3.40878	3.25514	3.33086	3.14809	2.91533	2.84695	2.81564	2.8058
554.02	24.3125	12.184	22.4358	22.8649	25.6787	40.182	52.4561	66.9275	78.0468	74.9154	64.2479	66.6183	72.2207	78.556	63.7159	0	0	4.25224	3.59684	2.89173	2.15686	2.2113	2.19832	2.16175	2.28359	2.91293	2.87543	2.93279	2.92677	3.25158	3.07214	3.47278	3.33314	3.50267	3.41661	3.84117	3.75488	3.548	3.58115	3.49409	3.59922	3.39426	3.30046	3.22007	3.06714	2.87532	2.8222	2.66606	2.74084
555.07	25.4043	13.9992	24.7842	25.8135	26.7797	40.8162	53.1445	68.7871	80.6955	76.2668	65.2766	68.3935	73.6301	79.6881	67.1708	0	0	4.08338	3.33556	2.53564	2.1247	2.18578	2.18853	2.47221	2.24006	2.66669	2.63186	2.97459	2.93291	3.2183	2.84143	3.42201	3.26348	3.47576	3.20132	3.66139	3.8349	3.52927	3.52582	3.40139	3.53529	3.48492	3.2693	3.07884	2.96336	2.8387	2.75731	2.57985	2.73958
555.97	20.2496	21.656	27.3398	25.2187	30.1627	43.7513	54.5472	71.0001	83.3122	78.2227	67.5413	70.206	75.7921	81.8986	68.9994	0	0	4.02383	3.11532	2.41775	2.22321	2.04331	1.93413	2.26132	2.14928	2.441	2.53292	2.96091	2.88554	3.27573	2.82539	3.39158	3.09808	3.28026	3.18963	3.38617	3.73061	3.4249	3.53462	3.39946	3.50697	3.46995	3.23662	2.92788	2.83129	2.76307	2.64056	2.54968	2.63554
557.01	23.4215	21.1593	22.1706	28.1647	29.2491	45.9698	56.3357	75.1227	86.6327	81.084	71.8854	72.4348	77.9902	84.278	70.6047	0	0	3.88542	3.26496	2.37941	2.07215	1.92952	1.95151	2.20075	1.98421	2.28087	2.4627	3.10006	2.77609	2.97198	2.84511	3.04457	3.00637	3.22241	3.33233	3.21923	3.67084	3.44731	3.49007	3.35352	3.5137	3.32715	3.00262	2.89491	2.84464	2.72276	2.60938	2.50829	2.53835
558.05	24.5329	12.4184	22.4646	29.1615	30.8805	46.9959	58.5887	79.5908	89.2904	83.3399	76.0694	74.7079	81.9968	87.2874	73.3725	0	0	3.71762	3.30431	2.47161	1.97958	1.82209	1.85676	1.89574	2.05036	2.1864	2.46805	2.87362	2.82156	2.695	2.91207	2.82904	2.96463	3.10148	3.23168	3.09645	3.52946	3.29902	3.38637	3.28125	3.36386	3.11637	2.81325	2.82685	2.83395	2.66503	2.51929	2.54183	2.4115
558.95	22.7665	11.0994	17.4219	23.8764	32.8998	47.9891	59.7087	81.5994	91.7916	86.0158	77.7616	76.9371	85.7801	90.4131	76.2567	0	0	3.70496	2.92682	2.55921	1.83648	1.81654	1.88475	1.92936	2.15743	2.04345	2.43407	2.81852	2.72563	2.56327	2.87105	2.81274	2.96528	3.11407	3.09287	3.05625	3.43993	3.24599	3.28955	3.20085	3.10765	2.99337	2.77186	2.89979	2.79967	2.61054	2.32161	2.47897	2.26354
560	21.865	12.24	23.7642	18.1099	34.9987	47.7848	62.6595	82.8003	94.5667	88.3655	79.3835	79.117	87.83	92.8538	78.8672	0	0	3.40819	2.8741	2.51507	1.81538	1.76267	1.7907	1.75082	2.24591	2.34424	2.45422	2.65015	2.46427	2.72212	2.72392	2.90356	2.92279	3.06194	3.19396	3.23395	3.09277	3.31751	3.10614	3.18551	2.90892	2.96995	2.85711	2.80119	2.62854	2.556	2.23134	2.42097	2.21887
561.04	19.5264	11.9478	28.9738	23.5162	31.3399	47.0368	64.2623	83.1356	96.2863	91.1037	81.4574	81.0967	89.1059	95.6674	81.433	7.51238	0	2.86009	3.06785	2.47416	1.95702	1.75118	1.87982	1.90064	2.03932	2.29723	2.78255	2.59895	2.36615	2.6715	2.74888	2.90029	3.06794	2.95589	3.34091	3.28471	3.13306	3.34057	2.92838	3.07394	2.91375	2.96671	2.69043	2.70488	2.55758	2.53037	2.2604	2.34437	2.26012
561.94	18.3955	22.2109	29.2557	29.357	32.3353	47.7414	65.2348	83.409	97.0318	92.1682	82.3395	81.0931	89.5167	97.6146	83.5396	15.4582	0	0.947317	2.88691	2.30203	2.01898	1.66528	1.71877	1.91617	2.1098	2.28861	2.72713	2.41536	2.72743	2.69907	2.73179	2.64793	2.91407	2.81757	3.05619	3.04826	2.9148	3.18549	2.90555	2.92918	2.97333	2.83801	2.69729	2.53836	2.49484	2.38964	2.32028	2.32069	2.29685
562.98	15.0774	28.2192	23.1801	29.3805	30.8264	48.5079	65.3394	83.8342	97.2293	91.6195	80.7164	81.1189	89.5012	97.7516	82.8192	18.9728	0	0	2.55324	2.05536	1.6832	1.74777	1.57707	1.81632	2.01254	2.14494	2.34504	2.52425	2.75655	2.55002	2.63116	2.50206	2.69384	2.76884	2.96911	2.85615	2.88352	3.06422	2.89759	2.81441	2.98151	2.77349	2.58614	2.59857	2.53859	2.32936	2.28346	2.19557	2.20398
564.02	20.9964	29.4361	16.2643	31.1881	33.236	47.7686	64.8315	84.5415	95.7956	89.7117	78.6817	80.3067	87.9931	95.8732	81.4084	22.5729	0	0	2.43871	1.9855	1.68909	1.5728	1.65415	1.76779	2.10963	2.0909	2.06765	2.39358	2.37376	2.4193	2.34032	2.31877	2.51806	2.58401	3.04788	2.92425	2.75365	3.06209	2.78135	2.63582	2.7423	2.64039	2.63652	2.56297	2.48616	2.25942	2.23261	2.09941	2.11051
565.07	18.2194	21.5092	17.6063	25.8691	32.5507	48.4286	62.8073	83.9293	93.7321	88.9073	77.8804	79.1985	86.5	94.0093	80.4144	24.1807	0	0	2.62229	1.97311	1.80045	1.65597	1.78174	1.70162	1.93231	1.87912	1.97833	2.22882	2.02628	2.25334	2.49014	2.36926	2.7854	2.55816	3.05628	2.86688	2.84243	2.95684	2.61643	2.6432	2.56631	2.54677	2.45065	2.49732	2.40487	2.25127	2.10375	2.00428	2.12239
565.97	12.1924	10.9117	10.0964	28.8506	36.4774	49.4403	61.7708	81.0899	90.5164	87.0061	76.9295	76.8303	83.5409	91.4357	80.0227	25.1941	0	0	2.47736	1.88809	1.67365	1.63854	1.78606	1.57966	1.75511	1.80661	2.01746	2.14021	2.00378	2.4396	2.43595	2.40906	2.76273	2.59095	2.7035	2.69368	2.67218	2.73448	2.49152	2.70963	2.48201	2.52274	2.47474	2.37046	2.29163	2.15594	2.04536	1.96255	2.13166
567.01	16.8214	0	11.5487	23.5825	37.0286	48.1397	60.9688	78.1124	88.3085	84.0112	74.4076	74.3957	80.0376	88.1361	77.6574	24.8303	0	0	2.37706	1.75908	1.35719	1.587	1.5574	1.29616	1.60932	1.92226	2.23702	2.42336	2.15049	2.33686	2.45077	2.46103	2.55795	2.7015	2.4094	2.68361	2.50585	2.56424	2.51071	2.76253	2.53105	2.518	2.32044	2.41533	2.26218	2.19132	1.97902	1.99877	2.08289
568.05	13.8758	8.79742	16.5997	26.474	34.1945	46.7464	59.4457	76.3924	85.8255	80.715	71.4591	73.3081	77.6559	86.863	76.2052	25.1455	0	0	2.10966	1.98637	1.46177	1.38802	1.62208	1.39115	1.73385	1.88716	2.37922	2.41836	2.12857	2.12942	2.4043	2.30317	2.26559	2.42101	2.2964	2.70373	2.42306	2.63707	2.4733	2.62486	2.36775	2.46232	2.29438	2.3289	2.21104	2.14634	2.00467	1.94116	2.0148
568.95	14.6202	16.7459	22.2745	23.0998	28.3756	45.7003	58.4957	74.8232	84.1056	78.6855	69.6829	72.1367	76.3414	85.2786	74.7462	25.2736	0	0	1.91956	2.01151	1.51674	1.37791	1.39522	1.49498	1.78272	1.81547	2.39884	2.13917	2.03319	2.16554	2.39056	2.1457	2.29826	2.34444	2.32345	2.47444	2.46697	2.73864	2.48445	2.54662	2.28487	2.41273	2.24419	2.16791	2.19241	2.09371	1.94501	1.85134	1.95415
570	7.59885	17.3893	18.1339	20.7359	28.2172	46.5501	56.9245	73.7306	82.7969	76.5876	68.3455	70.9584	74.4094	83.3142	74.2778	26.2795	0	0	1.82082	1.77056	1.393	1.44527	1.27731	1.61869	1.55956	1.77183	2.32823	2.11243	1.74293	2.20802	2.196	2.12198	2.16634	2.32743	2.29048	2.25902	2.41027	2.73013	2.39781	2.38868	2.28862	2.39806	2.24115	2.11661	2.13027	2.00624	1.92164	1.71803	1.83154
571.02	23.6171	9.40884	11.738	21.2972	31.4455	46.741	55.4275	72.4364	80.925	74.5051	67.1152	68.5591	72.9341	81.5703	72.9164	27.2819	0	0	0.241225	1.62576	1.37433	1.36356	1.28136	1.43666	1.28492	1.79138	2.22675	2.26373	1.70065	2.04186	2.08056	1.99524	2.11797	2.32925	2.36559	2.21051	2.31042	2.541	2.3926	2.30131	2.34506	2.22322	2.12072	2.11808	2.08776	1.97504	1.86674	1.72841	1.75261
572.05	25.8745	6.38766	20.5858	25.1848	26.154	46.2347	54.5458	72.0267	80.1386	73.213	66.4198	67.7436	72.3311	80.126	72.7289	27.7367	2.69644	0	0	1.72162	1.40952	1.20006	1.42029	1.53545	1.19472	1.94257	1.96788	2.09257	1.84635	1.8625	2.16814	1.90991	1.98889	2.11394	2.28471	2.07324	2.29807	2.28181	2.41167	2.29659	2.22214	2.18571	2.07453	2.06815	2.00148	1.91284	1.87501	1.7517	1.74893
572.94	22.3822	14.3121	28.0325	28.7392	22.825	45.1447	54.7013	70.1691	78.9374	72.6993	65.8926	67.1295	71.942	78.7963	72.114	27.8476	7.80539	0	0	1.68088	1.19651	1.06873	1.4696	1.35991	1.46027	1.81444	1.73894	1.93948	1.945	2.01762	2.09085	1.89346	1.96498	1.91075	2.19188	2.04327	2.22789	2.26338	2.25949	2.34222	2.21807	2.08945	2.06879	1.97871	1.92448	1.88595	1.77297	1.72078	1.82402
573.97	3.58607	14.2193	25.9579	24.2805	24.186	44.3257	53.6066	68.8766	78.282	73.0875	65.0585	66.6927	71.3413	77.8161	71.3481	28.7202	10.9856	0	0	1.72929	1.07508	1.17022	1.44581	1.25162	1.34654	1.8517	1.839	1.97261	2.10319	2.02209	2.00744	1.87481	1.84632	1.90874	2.21455	1.95458	2.14541	2.32138	2.20646	2.31221	2.11849	2.07557	2.06599	2.03203	1.84993	1.81964	1.73588	1.64716	1.79593
575	17.3149	17.5715	25.1764	22.9718	26.7629	42.9326	53.1833	67.6725	76.9681	72.8017	64.6097	66.3696	70.0283	78.015	71.2585	29.8469	13.0022	0	0	1.56831	1.14904	1.35726	1.30039	1.23463	1.09854	1.48952	1.65678	2.00658	2.14389	1.85512	1.74264	1.87682	1.87775	1.99061	2.18034	2.0449	2.19778	2.31515	2.16956	2.27868	2.0449	1.99543	1.95273	1.96551	1.85213	1.71679	1.70296	1.64816	1.74988
576.02	20.0369	16.4376	21.4687	18.7094	26.2486	42.8438	52.5691	67.7107	77.2621	72.1078	63.8463	65.3317	69.4181	77.1357	71.5194	30.2689	14.8629	0	0	1.27881	1.16248	1.26182	1.13919	1.2102	1.14548	1.45552	1.5805	1.54925	1.92384	1.94522	1.63328	1.822	1.95334	1.97855	2.01223	2.19245	2.22378	2.2038	2.09215	2.16596	1.96921	2.0194	1.82716	1.86117	1.87432	1.63116	1.67941	1.71035	1.68076
577.05	9.58457	14.1791	25.1775	22.4338	26.4824	45.0245	52.3198	68.6125	75.7329	71.0706	62.9138	64.1331	68.766	76.5573	71.1475	30.7991	15.7088	0	0	1.07171	0.990472	1.17929	1.17315	0.967814	1.32272	1.21555	1.50127	1.5198	1.72817	1.91035	1.66629	1.75579	1.99037	1.965	1.92853	2.23515	2.12604	2.19408	1.8843	2.05466	1.90067	1.97148	1.76148	1.80581	1.84102	1.64306	1.67013	1.66497	1.71213
577.94	4.37832	7.56377	16.2022	29.6375	27.0322	46.3853	52.8304	67.2547	73.8217	69.9596	61.6266	62.8077	68.28	75.4214	71.0964	31.598	16.1097	0	0	1.08327	1.08149	1.20682	1.2715	1.00047	1.37219	1.40894	1.7877	1.55401	1.77149	1.71628	1.61944	1.75125	1.91983	1.95035	1.9845	2.04504	1.88314	2.08656	1.96571	1.80181	1.90877	1.86509	1.76039	1.74856	1.72535	1.63578	1.62733	1.54685	1.615
578.97	12.276	18.2562	6.23065	28.001	26.4135	44.0926	53.7506	65.1604	72.3115	67.7052	60.4862	62.1392	66.8079	73.837	71.0899	32.4202	15.9355	0	0	1.01018	1.00131	1.19684	1.09437	1.19005	1.34071	1.58462	1.76997	1.72083	1.86668	1.5242	1.59322	1.86806	1.77853	1.90491	1.74701	1.88098	1.75525	2.07465	2.02533	1.79873	1.84673	1.74915	1.75954	1.72426	1.67094	1.58154	1.55399	1.47049	1.50541
580	12.0387	22.9742	1.03339	22.969	26.2962	40.9243	51.9716	63.9761	71.2801	66.4282	58.9992	60.3829	65.3915	71.307	70.3932	32.7274	17.0399	0	0	0.510822	0.769263	1.08582	0.94084	1.24581	1.43903	1.82233	1.40986	1.31486	1.72051	1.65804	1.63879	1.7502	1.66595	1.70786	1.58204	2.04903	1.79226	2.10469	1.85791	1.78644	1.76714	1.71863	1.71803	1.61851	1.6647	1.49736	1.53146	1.47137	1.42525
581.02	10.3831	16.2007	7.32329	25.1936	26.4316	40.818	49.5537	63.5842	69.7724	65.0886	57.6572	58.7546	63.9535	69.1485	68.5357	32.4627	18.0888	0	0	0	0.774427	0.931278	1.04974	1.19467	1.43205	1.61481	1.23931	1.28168	1.54356	1.57973	1.84335	1.57875	1.59614	1.57313	1.59449	2.02504	1.83488	1.98707	1.73785	1.79666	1.61242	1.78171	1.63531	1.6296	1.59665	1.45243	1.42938	1.42978	1.45257
582.05	20.0958	13.9704	15.3731	24.2354	24.2984	40.837	48.4377	62.0498	67.4279	63.7479	56.7215	57.4599	62.4895	67.39	67.3843	32.3385	18.827	0	0	0	0.871804	0.940988	1.1143	1.15074	1.18864	1.20794	1.30673	1.56584	1.45207	1.43232	1.56293	1.61044	1.60172	1.66921	1.63639	1.87596	1.68692	1.78616	1.73813	1.65139	1.65244	1.72474	1.68292	1.56273	1.50293	1.41391	1.33868	1.33799	1.42322
582.94	25.4287	12.9433	8.93314	14.406	21.4137	39.9749	48.4531	58.7513	65.8975	60.8971	55.1098	55.9519	60.5312	65.0006	65.244	32.0792	18.7161	3.69977	0	0	0.783455	0.8321	0.931572	0.856402	0.76912	1.20036	1.58488	1.72957	1.64583	1.38453	1.45753	1.69269	1.53044	1.6751	1.5478	1.80861	1.4843	1.68854	1.7611	1.7528	1.6112	1.55928	1.634	1.61318	1.488	1.38483	1.33658	1.3081	1.37044
583.97	19.8895	11.1908	14.709	9.67606	20.4981	39.3428	46.7254	54.5034	63.1438	58.5401	53.6276	53.7335	57.3542	62.7486	63.65	32.8334	19.2453	6.18269	0	0	0.467114	0.826372	0.738862	0.751338	0.774703	1.30887	1.28386	1.44631	1.79852	1.51065	1.28838	1.71736	1.44358	1.61407	1.54209	1.89087	1.50509	1.61961	1.68051	1.65461	1.55072	1.36866	1.52181	1.60089	1.49606	1.36111	1.39466	1.34459	1.32915
585	13.4127	16.3564	16.8717	12.438	21.8257	40.1834	44.9753	52.3868	59.9587	55.8308	51.5325	51.2874	54.8146	60.8931	61.7303	33.0994	19.6675	7.53534	0	0	0.412625	0.82703	0.964098	0.811072	1.07685	1.39638	1.20566	1.16999	1.60681	1.42634	1.28337	1.56595	1.50754	1.4401	1.56196	1.84673	1.6277	1.52671	1.60693	1.59122	1.46993	1.3324	1.37638	1.53353	1.46706	1.33826	1.37893	1.35035	1.27109
586.02	18.0327	8.94973	15.5252	18.8557	23.812	38.0953	43.4572	52.8652	56.8607	53.6897	48.3985	50.0167	53.4559	58.8353	60.559	33.8804	20.12	8.12931	0	0	0.506454	0.759253	1.03508	0.90677	1.31513	1.04835	1.28959	0.916594	1.24979	1.29045	1.25884	1.26795	1.49369	1.49697	1.61597	1.60374	1.72157	1.61295	1.50737	1.61503	1.47421	1.44847	1.40848	1.42585	1.35841	1.30644	1.29041	1.29613	1.21655
587.05	15.3002	8.84939	11.2278	11.7207	19.8572	34.6277	42.4898	52.6477	55.8905	51.859	45.695	48.5833	52.315	56.0839	59.0932	33.4437	20.6602	8.25003	0	0	0.499119	0.829256	0.96404	0.878557	1.24654	1.22371	1.50659	0.866443	1.15182	1.17329	1.38569	1.25349	1.47796	1.43592	1.58538	1.33596	1.61906	1.48858	1.42906	1.62989	1.3817	1.52464	1.33925	1.35052	1.29655	1.26432	1.20291	1.26105	1.14095
587.94	14.6009	6.49726	13.7719	8.32525	12.9158	32.7167	41.0866	49.5798	54.6764	49.9356	44.3619	47.1577	49.8807	53.6928	58.1114	33.6394	20.821	8.49436	0	0	0.264811	0.66706	0.864325	0.880335	1.27182	1.26638	1.25249	1.09129	1.28959	1.04005	1.27623	1.33149	1.35838	1.39762	1.51381	1.29509	1.49221	1.44855	1.29363	1.54484	1.29795	1.47941	1.26349	1.3698	1.26878	1.22038	1.15609	1.26024	1.11985
588.97	9.43218	10.2051	18.8705	9.21429	14.2509	32.7487	40.0988	46.5467	52.5884	48.4208	43.8628	45.2344	47.6474	52.6985	56.7864	33.1711	20.7735	8.73312	0	0	0.0770884	0.581247	0.717607	0.980386	1.15527	1.4383	1.10713	1.44021	1.37847	0.88711	1.12157	1.27074	1.37649	1.32832	1.39562	1.34599	1.39511	1.44106	1.32884	1.44878	1.22342	1.45056	1.23558	1.31013	1.33274	1.187	1.18784	1.21964	1.12307
590	12.3669	8.80106	19.3226	15.4451	15.3859	33.6659	38.3066	44.804	50.1497	46.8872	42.3977	43.2684	46.6291	51.5055	55.4451	33.2541	21.0805	8.81005	0	0	0	0.392761	0.492129	0.965591	1.14969	1.0499	1.2084	1.20332	1.35842	0.961196	1.18126	1.12859	1.29177	1.30487	1.26557	1.46709	1.46375	1.61045	1.32344	1.38504	1.23131	1.31275	1.30648	1.32912	1.2853	1.14031	1.14365	1.13974	1.20027
591.02	9.92261	15.3826	8.6419	15.8287	14.9468	34.1069	37.107	43.6243	48.8151	45.3777	41.0432	41.271	45.5828	49.8117	53.5162	33.2286	21.2744	8.61541	0	0	0	0.329301	0.486034	0.607542	0.920552	0.901149	1.13794	1.20162	1.18383	1.16596	1.15584	1.12017	1.30986	1.15847	1.14956	1.41918	1.44208	1.47524	1.34063	1.26927	1.22416	1.2387	1.26999	1.2791	1.16987	1.15084	1.08634	1.11268	1.18117
592.05	12.1456	14.8025	0	12.4037	13.0517	32.1997	36.773	43.8407	47.5242	43.8894	39.1309	39.6139	44.0235	48.3489	51.4989	33.2173	21.283	9.06345	0	0	0	0.251669	0.546558	0.407952	0.866104	0.729633	1.16163	1.20308	1.17678	1.17554	1.11014	1.19576	1.26814	1.16299	1.26326	1.35845	1.37595	1.44553	1.22062	1.31089	1.35644	1.21654	1.21626	1.2914	1.16665	1.13925	1.05495	1.0751	1.06617
592.94	6.96341	4.55748	3.49672	8.657	18.4898	30.0578	36.7503	42.5377	46.0748	42.7273	37.7747	38.8139	42.5751	47.2283	50.4254	33.1307	21.3668	9.16014	0	0	0	0.30865	0.432874	0.533586	0.968375	0.840497	0.999278	1.28173	0.947249	1.12976	0.968386	1.33705	1.24792	1.17258	1.25004	1.21198	1.25268	1.29599	1.26156	1.26002	1.41754	1.22241	1.11995	1.27923	1.21849	1.08843	1.01436	1.06529	0.994681
593.97	7.47437	1.40045	9.18205	9.11993	14.7996	29.3032	35.3059	41.0295	43.888	41.9984	36.5185	37.3891	41.2953	45.6803	49.6691	32.6896	21.8471	8.88135	0.700704	0	0	0.299986	0.448174	0.93403	0.684858	0.79388	0.953985	0.913964	1.05697	1.05453	1.07658	1.43155	1.18483	1.28155	1.11953	1.21975	1.20301	1.33754	1.20605	1.21391	1.26325	1.17094	1.1104	1.2176	1.18009	0.980039	0.953337	0.959926	0.986475
595	0	6.78178	14.5682	8.00633	10.0294	28.9286	33.4927	38.9707	42.2235	40.7233	36.1789	36.2802	40.1437	44.1749	48.9148	32.4925	21.9024	8.7724	1.391	0	0	0.243808	0.544291	0.921312	0.111699	0.784094	0.664839	0.671227	0.889885	1.07203	0.98524	1.21976	1.13329	1.19167	0.983748	1.22417	1.15907	1.26804	1.20645	1.16326	1.18344	1.0688	1.06085	1.08517	1.07665	0.994274	0.98798	0.938501	0.958432
596.02	0	13.2045	10.8225	11.9705	10.397	29.4079	32.8309	38.1886	41.0403	38.9495	34.5806	34.9187	38.7329	43.1445	47.9645	31.9491	21.6024	9.23535	1.682	0	0	0.124304	0.429304	0.61137	0.164907	0.838801	0.772614	0.592953	1.01461	0.930565	1.00584	0.892113	1.02883	1.12564	1.03491	1.07525	1.1454	1.27877	1.14718	1.1633	1.14319	1.03225	1.00647	1.03508	1.08836	0.998167	1.00727	0.881322	0.888831
597.05	1.61634	4.48835	6.65441	15.3638	12.7584	29.6472	33.0148	36.6202	40.404	36.9674	33.2206	34.0553	38.0348	42.1315	47.0407	31.9303	21.3614	9.29721	1.72964	0	0	0	0.348823	0.555301	0.817793	1.01431	0.808021	0.731899	0.905146	0.966822	0.815534	0.86976	0.934305	0.99908	1.04325	1.00379	1.21143	1.17092	1.17846	1.13268	1.14989	1.03318	1.02277	1.03652	1.11728	0.975833	0.971	0.898277	0.900568
597.94	7.48072	0.686332	0	15.0196	15.3445	29.5542	32.1871	34.9092	38.9525	35.3736	31.9613	32.723	36.6833	40.7871	45.886	31.8085	21.2122	9.12005	2.03805	0	0	0	0.220725	0.584214	0.895234	0.999466	0.928814	0.936306	1.0682	0.835466	0.907395	0.964716	0.940189	0.897508	1.08329	1.06775	1.21008	1.0922	1.1521	1.08303	0.992744	1.06107	1.03585	0.949706	1.07561	0.892587	0.919469	0.87331	0.878662
598.97	8.75495	7.15677	0	12.6209	15.8402	27.0551	30.6045	33.9731	37.1788	34.5123	31.4338	31.5227	34.9506	39.0241	44.4987	31.874	21.7383	9.06554	1.9179	0	0	0	0.120473	0.553355	0.686019	0.753635	0.758451	1.29313	0.929981	0.834625	0.92882	0.806469	0.922518	0.844285	1.14303	1.21889	1.09897	0.945745	1.15192	0.948162	0.939046	0.969678	1.04346	0.922652	1.02057	0.880583	0.873198	0.883459	0.869383
600	9.79571	12.4352	8.33209	14.0623	14.668	25.5239	30.9771	32.805	35.4534	33.6469	30.672	31.0003	33.3975	37.3999	43.4029	31.0728	21.7653	9.00392	2.01075	0	0	0	0.29178	0.257403	0.55375	0.58327	0.761942	1.44773	0.726285	0.763788	1.03383	0.821671	0.916111	0.860428	0.92493	1.17134	0.956935	0.841321	1.11855	0.880984	0.973953	0.914015	0.987602	0.957616	0.9206	0.843551	0.831472	0.914793	0.809462
601.02	13.2836	2.06904	15.5197	11.607	12.7465	25.0222	30.1116	31.3379	34.4918	32.161	29.9022	30.1385	32.7202	36.2856	42.1375	30.7479	21.5327	8.94242	1.99991	0	0	0	0.596711	0.42302	0.556487	0.587669	0.658046	1.27588	0.471857	1.03558	1.02523	0.881205	0.871352	0.991743	0.875116	1.01276	0.993258	0.837873	1.09472	0.90637	0.98532	0.998583	0.845956	0.917074	0.801758	0.815778	0.78806	0.886219	0.816698
602.05	12.1601	0	11.0827	6.79919	13.0976	25.0795	28.6463	31.4142	33.4625	30.9981	29.0021	28.7574	31.7426	35.5238	41.1885	30.7343	21.1379	8.93032	2.24674	0	0	0	0.562983	0.384919	0.5063	0.515697	0.667135	0.838919	0.587713	1.10663	0.993284	0.8337	0.825814	1.01488	0.689635	0.933644	1.05912	0.904077	1.00929	0.884967	0.912033	0.948552	0.739985	0.880432	0.774382	0.807746	0.831409	0.802776	0.735617
602.94	2.3496	7.87805	11.2627	4.25266	15.0037	25.3839	27.6861	31.5009	32.5151	30.3657	27.1888	27.1478	30.4422	34.0318	40.4792	30.2213	20.6038	8.79095	2.22175	0	0	0	0.356395	0.345725	0.610433	0.511562	0.409171	0.704822	0.856688	0.998533	0.880942	0.675937	0.760549	0.971752	0.825852	0.928176	1.00213	1.02202	0.965842	0.829631	0.900616	0.852718	0.738736	0.83908	0.841962	0.824405	0.823976	0.744527	0.669885
603.97	0	12.6226	12.1911	10.8519	13.927	23.6507	28.0748	30.1704	31.5492	29.4677	25.3239	26.0794	29.0188	32.9037	39.402	29.2943	20.2297	8.86468	2.33942	0	0	0	0.15203	0.30349	0.751212	0.675927	0.550279	0.670096	1.01809	0.931837	1.00201	0.738748	0.803925	0.778367	0.916939	0.84698	0.847308	0.965273	0.863474	0.965499	0.886284	0.777137	0.816943	0.805527	0.851625	0.797396	0.84408	0.743897	0.673064
605	0	0	13.5048	9.32481	14.0717	21.9072	26.8249	27.4903	30.541	27.702	24.1242	25.0725	27.5762	31.6978	38.4352	28.3582	20.1051	8.72863	1.97679	0	0	0	0	0.242681	0.525713	0.854107	0.769478	0.849438	0.861808	1.00923	0.967218	0.783906	0.945055	0.816515	0.975244	0.739172	0.80349	0.877855	0.792373	1.01436	0.800389	0.827036	0.756333	0.7366	0.757296	0.729373	0.725048	0.708522	0.770103
606.02	0	0	13.106	9.14604	10.5207	21.1625	25.2433	26.5563	28.962	26.5507	23.9916	24.102	26.2046	30.5633	37.8232	28.2598	19.9374	8.69324	1.99413	0.0688045	0	0	0	0.269398	0.24033	0.761353	0.829837	0.871715	0.815639	0.872928	0.866517	0.654976	0.847646	0.836789	0.857861	0.610523	0.884617	0.796332	0.767903	0.883076	0.822233	0.845467	0.724901	0.800895	0.70387	0.739317	0.671716	0.699234	0.748575
607.05	4.97539	1.82873	4.10444	0	10.4863	22.4554	24.6045	26.6009	27.4339	25.612	24.0009	23.4521	25.5657	28.4868	36.8927	27.88	19.3443	8.54137	2.07235	0.31301	0	0	0	0.21853	0.226168	0.719958	0.701837	0.761104	0.702987	0.730059	0.667648	0.554263	0.633681	0.853816	0.694872	0.634139	0.771735	0.809937	0.823938	0.804159	0.806093	0.858004	0.737338	0.83978	0.678683	0.764343	0.650031	0.689269	0.690982
607.94	4.94603	6.9461	0.235029	0	11.4651	21.3814	23.8094	25.4415	26.1145	24.8693	22.6698	22.4877	24.697	27.6004	35.0161	27.6291	18.857	8.58559	2.12554	0.367738	0	0	0.237432	0.165108	0.454633	0.634443	0.602795	0.499096	0.852848	0.705248	0.549029	0.615294	0.678306	0.718794	0.700147	0.719586	0.748501	0.690975	0.811969	0.808718	0.703353	0.824458	0.746565	0.753059	0.647738	0.733649	0.718783	0.731775	0.673541
608.97	12.9999	0	6.91082	3.40628	7.88588	20.2467	22.3941	24.4281	25.3355	24.0718	21.5903	21.7658	24.208	26.611	33.3526	26.5259	19.4538	8.31953	1.97753	0.390024	0	0	0.174847	0	0.568899	0.498163	0.585498	0.555604	0.784165	0.820323	0.581067	0.588401	0.821864	0.617769	0.732397	0.805435	0.748484	0.720198	0.825626	0.781958	0.676057	0.792866	0.73909	0.696537	0.627473	0.681955	0.640621	0.678192	0.671716
610	14.9358	0	9.51573	9.54007	4.45428	18.8402	21.2844	23.0517	23.6189	22.9203	20.662	20.632	23.0645	26.016	32.8856	25.8437	18.9299	8.21457	2.11293	0.379025	0	0	0	0.0141887	0.608833	0.552876	0.300715	0.557852	0.729102	0.702461	0.585341	0.584665	0.847715	0.615954	0.864676	0.608073	0.805795	0.753246	0.842022	0.733226	0.741173	0.641204	0.72697	0.697087	0.65311	0.688738	0.561044	0.659119	0.644682
611.02	14.1901	0	13.0432	7.80457	3.9136	20.0891	21.9028	23.2665	22.3315	21.5797	19.7627	19.627	21.7764	24.942	32.0156	25.4239	18.2368	8.01138	2.11708	0.28448	0	0	0	0.18805	0.443246	0.464649	0.196044	0.420006	0.648529	0.73611	0.838592	0.590684	0.738589	0.547756	0.848063	0.562596	0.687852	0.8208	0.830945	0.677822	0.714307	0.606367	0.703793	0.722391	0.698149	0.667425	0.520848	0.59875	0.62236
612.05	4.45319	0	9.59204	12.3825	3.86055	19.5041	21.6684	21.5999	21.8649	20.5423	18.7592	18.3291	20.5234	24.4259	31.011	25.0802	17.5687	7.95502	1.9111	0.306821	0	0	0	0.104472	0.224948	0.461816	0.334088	0.424906	0.65573	0.574763	0.770097	0.636133	0.741183	0.641398	0.865085	0.561952	0.69999	0.803717	0.708585	0.753176	0.69513	0.626175	0.57892	0.694982	0.666756	0.580356	0.55471	0.577548	0.604676
612.94	0	0	3.32334	13.4248	5.11172	18.4922	20.332	21.6164	21.5585	20.1734	18.0603	17.7371	20.0095	23.275	29.6086	24.644	17.8685	7.77505	1.84473	0.551669	0	0	0	0.0544527	0.147968	0.250753	0.57464	0.661436	0.556461	0.594036	0.717045	0.583211	0.616223	0.69973	0.762998	0.843071	0.690235	0.732243	0.703173	0.723152	0.623478	0.743241	0.515603	0.717766	0.617377	0.556741	0.61794	0.624173	0.573614
613.97	0	0	0.0408738	9.2586	9.77806	16.1693	18.9219	20.2246	20.6035	19.6964	17.4933	17.3216	19.2609	22.2919	28.9755	23.6991	17.4382	7.5295	1.80627	0.691141	0	0	0	0	0.226979	0.482331	0.552221	0.67089	0.48365	0.4904	0.517544	0.565508	0.660654	0.819287	0.688582	0.853413	0.710423	0.496191	0.696227	0.686331	0.597638	0.786501	0.582973	0.636951	0.578862	0.574784	0.635874	0.589639	0.557511
615	0	6.96578	1.72716	5.08486	7.26695	16.5479	18.9547	19.6828	19.4552	19.3387	16.7915	16.6811	18.7489	21.4478	28.1918	23.3636	17.1237	7.28418	1.77605	0.591566	0	0	0	0.095763	0.242107	0.540985	0.357739	0.408277	0.657833	0.628455	0.630703	0.624195	0.633793	0.718768	0.563665	0.703924	0.548602	0.355282	0.595963	0.534296	0.625286	0.769714	0.592323	0.580147	0.566425	0.533262	0.584019	0.522232	0.543525
616.02	2.70228	11.8799	0	4.21497	7.93343	17.3339	19.2064	18.995	18.3882	18.2786	16.4367	15.7014	18.2382	20.8307	27.6388	22.7949	17.0968	7.30867	1.68999	0.538191	0	0	0	0.00920677	0.205239	0.583481	0.283048	0.292409	0.718834	0.518523	0.606846	0.492232	0.638456	0.638825	0.607629	0.517061	0.498316	0.511919	0.41962	0.589806	0.710809	0.664243	0.613821	0.562851	0.537329	0.513581	0.528492	0.418186	0.550418
617.05	7.54141	6.83833	0	4.84283	4.4192	17.2738	18.1981	19.8002	17.8936	17.6473	15.9502	15.2379	17.5344	20.1815	26.7548	22.3947	16.125	7.13196	1.74025	0.56063	0	0	0	0	0.260208	0.519675	0.300578	0.447986	0.717127	0.511271	0.508798	0.411919	0.552822	0.445646	0.468901	0.709896	0.485558	0.680791	0.506405	0.573758	0.616197	0.549082	0.636765	0.622016	0.518659	0.569167	0.508489	0.417637	0.504039
617.94	7.19278	3.0579	0.987572	2.40491	6.29007	16.83	16.6217	18.0289	17.225	16.9498	15.3734	14.9333	17.0585	19.7011	25.9495	21.4357	15.3707	6.92751	1.65738	0.4251	0	0	0	0	0	0.339617	0.361465	0.587694	0.504022	0.383014	0.517876	0.39583	0.583451	0.493956	0.471815	0.655069	0.665903	0.634223	0.554891	0.576538	0.584893	0.539697	0.551201	0.531911	0.536557	0.572219	0.515463	0.448038	0.44657
618.97	0.664409	0	4.84022	7.98112	7.3636	15.7262	16.17	15.5726	17.2571	16.2344	14.6616	14.4579	16.3372	18.9969	25.1343	20.7814	14.6549	6.63017	1.78164	0.357701	0	0	0	0	0	0.091663	0.526545	0.365084	0.431821	0.586027	0.537772	0.45207	0.573218	0.620562	0.566818	0.460755	0.591312	0.574862	0.540482	0.615944	0.537827	0.52397	0.518438	0.506802	0.531487	0.461846	0.493151	0.498867	0.431541
620	0	5.70331	7.97297	9.71601	9.85856	14.7146	15.5364	15.1483	16.4119	15.2317	13.6242	13.9371	15.8876	18.2467	24.3173	19.9921	14.6384	6.55295	1.79415	0.465471	0.0558746	0	0	0	0	0.117165	0.524984	0.290505	0.419824	0.684891	0.607083	0.423113	0.549511	0.667423	0.731726	0.427334	0.527295	0.519821	0.519379	0.555145	0.624947	0.554331	0.528286	0.50639	0.486233	0.413895	0.455746	0.462573	0.423922
621.02	4.0974	6.69579	10.409	4.72097	7.31174	13.7615	14.7258	15.7414	16.0998	14.6199	13.1557	13.5358	15.1277	17.1809	23.2907	19.7063	14.4388	6.33257	1.68963	0.49009	0.214619	0	0	0	0.142708	0.487407	0.229123	0.269297	0.448781	0.573904	0.469772	0.496647	0.42783	0.46617	0.650289	0.541745	0.441816	0.522536	0.64311	0.402462	0.530074	0.493728	0.527605	0.577781	0.458279	0.45072	0.419897	0.370296	0.406224
622.05	1.78455	7.17816	0	3.01499	8.77923	13.8517	14.5807	15.8951	15.5503	14.2987	12.6962	13.3721	14.8264	16.7298	22.5077	19.7474	14.1926	6.30498	1.41038	0.428946	0	0	0	0	0.193053	0.611364	0.0282473	0.463734	0.465889	0.460289	0.575507	0.627536	0.38932	0.393803	0.402004	0.543962	0.435843	0.430267	0.613122	0.31017	0.541175	0.479645	0.400939	0.522642	0.438911	0.436717	0.47087	0.413188	0.412166
622.94	0	3.42253	0.689683	7.83557	6.0989	13.8157	14.5637	15.117	15.7597	13.746	12.0558	12.5205	13.9692	16.0823	21.7825	19.0257	13.4217	6.04958	1.32528	0.502561	0	0	0	0	0.161604	0.335895	0.190633	0.365981	0.442945	0.307712	0.592858	0.55115	0.404407	0.32356	0.357893	0.493894	0.426278	0.470733	0.47883	0.438056	0.43974	0.533705	0.461757	0.500606	0.439392	0.412329	0.482582	0.454143	0.421308
623.97	7.4787	1.00268	4.05488	8.75633	4.64419	14.5024	13.3448	14.8371	15.0263	12.9446	11.3579	12.1276	13.3965	15.5154	20.9222	18.0923	12.7315	5.83431	1.45424	0.570577	0	0	0	0	0.0594733	0	0.273587	0.456631	0.673591	0.504357	0.633803	0.382693	0.474172	0.42861	0.345397	0.39492	0.426814	0.385839	0.455675	0.522015	0.40938	0.539738	0.43839	0.533911	0.396774	0.395383	0.466442	0.426086	0.446637
625	15.0361	3.3569	7.63695	8.39197	1.38218	13.5874	12.1536	12.8786	13.8743	12.1565	11.2573	11.4264	12.9907	14.4165	20.4369	17.4655	12.653	5.59962	1.60769	0.543831	0.0415953	0	0	0	0	0	0.185896	0.307404	0.391799	0.350265	0.362066	0.248932	0.349766	0.465169	0.462402	0.316324	0.436934	0.376192	0.520535	0.513129	0.438157	0.402592	0.386933	0.451034	0.373807	0.377659	0.372381	0.411836	0.466882
626.02	13.1126	4.34435	6.40448	3.14419	4.88084	12.3851	12.1074	12.0024	12.9274	12.0032	11.1267	10.9407	12.4596	13.8824	19.9662	17.1134	12.259	5.3878	1.49536	0.425306	0	0	0	0	0.118688	0.0042527	0.228567	0.173553	0.25656	0.422624	0.299782	0.310492	0.316559	0.403266	0.577359	0.279974	0.436506	0.404048	0.406472	0.440641	0.522917	0.257173	0.374588	0.374625	0.332457	0.351393	0.351317	0.381766	0.436321
627.05	0	5.71664	7.08801	5.58761	6.33831	10.9057	11.8788	11.804	12.5787	11.6408	10.5409	10.3706	11.9496	13.6104	19.3393	16.8348	11.9885	5.20939	1.37259	0.263735	0.0799168	0	0	0	0	0.151406	0.37584	0.0122475	0.196936	0.294213	0.318635	0.317431	0.395905	0.384035	0.615468	0.347579	0.453151	0.440967	0.256563	0.414656	0.502149	0.322067	0.434076	0.37702	0.356162	0.366963	0.29137	0.380999	0.401046
627.94	0	5.36497	3.15905	5.70125	3.28066	10.8095	12.4427	11.6446	11.7918	11.3735	9.91888	10.0222	11.6699	13.3826	18.4647	16.2367	11.4224	5.00634	1.12238	0.411876	0.0111586	0	0	0	0	0.16718	0.442774	0.0860409	0.562007	0.325685	0.42504	0.34638	0.569862	0.40386	0.503719	0.386997	0.437701	0.436694	0.333372	0.385613	0.409095	0.400754	0.425	0.380041	0.395683	0.381038	0.265033	0.344839	0.363278
628.97	3.85785	0.464279	0	7.1186	0	8.90542	11.9935	10.5206	11.2593	10.9527	9.31124	9.58437	11.4734	12.8572	17.8923	15.6845	11.2964	4.78851	1.31679	0.555479	0	0	0	0	0	0.0317012	0.0783159	0.149503	0.398969	0.200608	0.31779	0.405538	0.426951	0.371269	0.453306	0.334204	0.403322	0.472936	0.448361	0.343225	0.455836	0.435594	0.367685	0.438487	0.386963	0.301239	0.231949	0.348563	0.350247
630	6.65384	0	0	3.65712	0	8.84931	11.1681	10.2081	10.9522	10.3211	9.19789	9.06688	10.8287	12.2896	17.0294	15.2096	11.0929	4.55055	1.35667	0.593249	0.0502375	0	0	0	0	0	0.0149614	0.159505	0.403235	0.290294	0.0401676	0.503858	0.289875	0.326501	0.419056	0.384231	0.444931	0.532021	0.452385	0.457539	0.358038	0.397915	0.317399	0.437844	0.347604	0.306097	0.317292	0.32657	0.283605
631.01	0	0	0	6.16838	0	9.13133	9.95144	9.83227	10.5206	9.4881	8.8744	8.85847	10.2295	11.8606	16.5495	15.0606	11.2605	4.5917	1.39687	0.426367	0.144636	0	0	0	0	0	0.245024	0.249749	0.357678	0.302215	0.0815313	0.471275	0.29596	0.394802	0.415696	0.383701	0.465908	0.478482	0.360882	0.455486	0.373622	0.327911	0.354607	0.452051	0.336716	0.331567	0.352536	0.360934	0.280627
632.02	0	0	0	5.19471	0	10.4512	10.0295	9.81545	9.55637	9.1779	8.83849	8.27551	9.86444	11.2733	15.9788	14.1052	10.8617	4.51613	1.19813	0.471417	0.0546968	0.140454	0	0	0	0	0.529704	0.211032	0.431242	0.275759	0.289224	0.314608	0.320715	0.265892	0.252132	0.296287	0.472553	0.363327	0.356864	0.355624	0.425085	0.340794	0.409469	0.343753	0.374667	0.350424	0.332727	0.328886	0.253465
633.04	0	2.43989	3.34728	4.26848	0	9.01206	9.84749	9.24594	9.28787	9.15085	8.10715	8.05929	9.32893	10.5962	15.1574	13.6036	10.3158	4.09626	1.16736	0.468742	0	0.212106	0	0	0	0	0.212428	0.28759	0.286454	0.284384	0.261631	0.242221	0.330454	0.208562	0.161855	0.210608	0.407071	0.358675	0.279532	0.274699	0.509313	0.346612	0.40129	0.36874	0.368344	0.306103	0.288917	0.241836	0.24475
634.05	5.92869	2.10723	1.26841	3.43303	0	6.87958	9.83462	8.82702	9.57314	8.90772	7.66022	7.80239	8.82835	10.2119	14.5441	13.2333	9.69413	3.81841	1.03472	0.539942	0.0157776	0.204532	0	0	0	0	0	0.296582	0.426165	0.20968	0.161214	0.295137	0.332819	0.209267	0.259919	0.241151	0.17904	0.409613	0.29727	0.398752	0.387404	0.300074	0.348428	0.348102	0.331972	0.317078	0.303045	0.236261	0.245508
635.07	2.55791	5.70042	2.75814	6.61858	0.723962	5.87278	9.65054	8.67879	9.05591	8.42873	7.36834	7.7181	8.60063	10.0318	14.0695	12.8964	9.75795	3.90518	0.996521	0.40288	0	0.0297788	0	0	0	0	0	0.183162	0.276155	0.196284	0.121027	0.319897	0.338955	0.21919	0.315407	0.265188	0.150724	0.432988	0.256575	0.422823	0.353149	0.230469	0.347487	0.327084	0.295925	0.305008	0.27823	0.279654	0.231685
635.94	6.17492	2.23906	3.11881	2.05695	1.29896	7.24242	9.42879	8.25113	8.5858	7.7793	7.27347	7.33804	8.34345	9.7694	13.4186	12.3356	9.62116	3.92118	1.15082	0.320364	0.0524019	0	0	0	0	0.0551426	0.178202	0	0.17701	0.238613	0.240759	0.30422	0.242151	0.132148	0.276523	0.143073	0.189541	0.384306	0.313225	0.367168	0.279995	0.184699	0.328928	0.269716	0.296092	0.254443	0.238838	0.296558	0.275125
636.95	7.35737	0	2.19744	0	1.78762	8.96031	9.33898	8.28569	7.76648	7.54699	6.74733	7.39893	7.91985	9.52621	12.9294	12.054	9.06159	3.7206	1.06192	0.318689	0	0	0	0	0	0	0.244443	0	0.032732	0.281944	0.282177	0.272939	0.273596	0.185379	0.183471	0.138752	0.389567	0.391192	0.32008	0.344724	0.267163	0.205904	0.30998	0.279817	0.265345	0.259558	0.216154	0.280021	0.232633
637.97	4.76889	0	0.399875	0	4.77784	8.59432	8.85777	7.37558	7.56947	7.23343	6.38573	7.11277	7.4388	8.94786	12.6448	11.601	8.53186	3.61241	0.897601	0.553876	0.181959	0.142403	0	0	0	0	0.0849847	0.197159	0.144041	0.134351	0.417242	0.359617	0.239131	0.231099	0.160979	0.243945	0.278761	0.314498	0.37414	0.283249	0.222075	0.172332	0.351852	0.313237	0.247112	0.270364	0.192108	0.268419	0.223817
638.98	0	0	2.06918	3.63284	4.94245	7.52379	8.0952	6.9065	7.12491	7.01442	6.39946	7.00606	7.37778	8.52449	12.2874	11.0503	8.51489	3.66493	0.859673	0.560694	0.151016	0.263479	0	0	0	0	0.166448	0.187335	0.154258	0.294173	0.453153	0.408276	0.146333	0.248394	0.203481	0.300051	0.26368	0.227996	0.301823	0.244031	0.300435	0.230048	0.32477	0.235168	0.251746	0.235944	0.188067	0.233222	0.197964
640	0.901289	0	0	3.16895	3.16232	5.41023	7.33125	6.28097	7.46419	6.67043	6.12038	6.55359	7.17741	8.02677	11.8049	10.503	8.08615	3.70561	0.805034	0.520302	0.2424	0.22043	0	0	0	0	0.293446	0.0511811	0.167907	0.260817	0.462354	0.307066	0.094199	0.088476	0.30232	0.254068	0.206044	0.234952	0.176987	0.241644	0.182081	0.253799	0.251038	0.230148	0.272158	0.16379	0.191806	0.221454	0.226329
641.01	2.84104	0	0	0	2.70045	6.00476	7.03984	7.93829	6.91866	6.38546	6.06258	6.33928	7.05384	7.7218	11.1871	9.91565	7.58558	3.5544	0.564342	0.273964	0.121082	0	0	0	0	0	0.211418	0	0.0429	0.12325	0.363287	0.21427	0.135337	0.125131	0.349718	0.18932	0.212032	0.246508	0.14804	0.337773	0.133097	0.275338	0.212795	0.280869	0.237841	0.160499	0.218729	0.208852	0.189381
642.02	0.57756	0	0	3.76701	2.73444	6.69814	6.90007	7.78607	6.88128	6.11034	5.7878	6.1691	6.74517	7.3566	10.6588	9.44959	7.3188	3.34013	0.3697	0.18231	0.201832	0.118766	0.0474244	0	0	0	0	0.079158	0.0222685	0	0.262982	0.196096	0.27986	0.159171	0.181728	0.235364	0.0529784	0.242458	0.219857	0.352892	0.139517	0.246808	0.234981	0.300872	0.245809	0.223589	0.203293	0.238947	0.207901
643.04	0	0	3.266	1.21721	1.36233	6.6393	6.73131	6.57957	6.54976	5.84249	5.62727	5.74239	6.64466	7.24156	10.2005	9.40888	6.93234	2.95241	0.565468	0.216564	0.365185	0.204565	0.0428265	0	0	0	0	0.146875	0	0.158821	0.2596	0.270924	0.255243	0.305504	0.128118	0.188963	0.0131597	0.146109	0.256195	0.305174	0.229947	0.237684	0.218372	0.226827	0.243431	0.287327	0.173546	0.191827	0.237628
644.05	0	0	6.21045	0	1.43224	4.21082	6.21172	5.25504	6.81598	5.7876	4.81028	5.2433	6.09597	6.90362	9.97671	9.21539	6.43605	2.89603	0.536535	0.375527	0.400497	0.347306	0	0	0	0	0.160051	0.254721	0.172259	0.248735	0.25725	0.237889	0.205081	0.214252	0.262136	0.144628	0.0965159	0.203971	0.194868	0.209296	0.315258	0.315393	0.200654	0.215814	0.264962	0.253207	0.171691	0.182153	0.244559
645.07	0	0	8.85351	0	1.38503	4.11736	5.50853	5.99638	6.08402	5.4835	4.72061	5.10794	5.48847	6.31668	9.37004	8.95717	6.29258	2.84067	0.603042	0.368848	0.274526	0.0989346	0	0	0	0	0.109977	0.0891752	0.18841	0.258374	0.374837	0.273556	0.224174	0.384735	0.337806	0.214633	0.147423	0.228079	0.0982912	0.207134	0.340754	0.245581	0.17422	0.270363	0.244227	0.19053	0.217015	0.197946	0.21886
645.94	0	0	0	0	1.83127	5.59011	5.29841	5.63823	5.77037	5.44997	4.45054	5.27293	5.1463	6.06018	8.99347	8.73326	6.31728	2.90229	0.384778	0.399542	0.256669	0	0	0	0	0	0	0.0323496	0.190252	0.236762	0.386896	0.213635	0.257344	0.331186	0.26034	0.296299	0.0804344	0.32984	0.143859	0.200114	0.321486	0.258086	0.118727	0.244936	0.208123	0.187126	0.272068	0.208845	0.149014
646.95	0	0	0	2.50385	1.36828	7.13635	5.13229	5.2046	5.76985	5.08169	4.4331	4.68361	4.98712	6.161	8.67138	8.69444	5.97176	2.77571	0.433152	0.358188	0.291006	0	0	0	0	0	0	0	0	0.193177	0.230008	0.164371	0.379979	0.280409	0.0586	0.237763	0.0737631	0.194581	0.109482	0.241274	0.215974	0.268323	0.0954303	0.158801	0.197787	0.181549	0.217278	0.12438	0.126935
647.97	0	0	0.533074	1.33015	0.215356	5.97758	4.90351	4.69726	5.98142	4.7705	4.40323	4.1517	4.82469	6.39636	8.43688	7.88658	5.62261	2.6716	0.425016	0.307172	0.118705	0	0	0	0	0	0	0	0	0	0.156864	0.0669484	0.385634	0.219986	0	0.0604753	0.0809077	0.140132	0.152012	0.207026	0.169493	0.277101	0.169139	0.153388	0.178095	0.180579	0.115308	0.129763	0.151662
[truncated: 22 more columns]

## Sheet: 6 days
Wave	200	205	210	215	220	225	230	235	240	245	250	255	260	265	270	275	280	285	290	295	300	305	310	315	320	325	330	335	340	345	350	355	360	365	370	375	380	385	390	395	400	405	410	415	420	425	430	435	440
252.03	0	0	0	0	0	0	0	0	0	0	0	0	0	0	0.264034	0	0	0	0.175458	0.0853469	0	0	0.106336	0	0	0.00649267	0	0	0	0	0.0418687	0.0226459	0.0647535	0.0696423	0	0	0	0	0.03433	0.023856	0.0110786	0.0189056	0	0	0.0256672	0.0357209	0.017485	0	0.0353492
252.96	0	1.66757	0	0	0	0	0	0	0.0448487	0	0	0	0	0	0.132145	0	0	0	0.124008	0.12138	0.0942983	0	0.0395716	0	0.221473	0.0745636	0	0	0	0	0.0097954	0	0	0.0769688	0	0.10405	0.0347918	0.104894	0.00290917	0.0367203	0.0898924	0.0144501	0	0	0	0	0.0280794	0	0.0316971
254.06	2.1056	0.688159	0	0	0.544461	0	0	0	0	0	0	0	0	0	0.0316607	0	0	0.0615726	0.111014	0.00630249	0.0871537	0	0.00519908	0	0	0	0	0	0.0398308	0	0.095499	0	0	0.0827011	0	0.0803378	0.0588458	0.0806167	0.00494269	0	0.0903988	0	0	0.00656145	0	0	0.0347689	0	0.000160871
255	0	0	0	0.743407	0	0	0	0	0	0	0	0	0	0	0	0	0.100657	0.0494169	0	0	0	0	0.105457	0.0704629	0	0	0.0385762	0	0.154324	0	0.104148	0	0	0.134216	0	0	0.00441208	0.0252934	0	0.00780896	0.0732323	0.0123894	0	0.0546265	0.0106435	0	0.0317583	0	0.00785386
255.93	0	0	0	0.329919	0	0.125062	0	0	0	0	0	0	0	0	0	0	0.115862	0.0290564	0	0	0	0	0.0932219	0	0	0	0.134207	0	0.0713182	0	0.0927307	0	0.0180126	0.0409144	0	0	0	0	0	0.0112983	0.0107475	0	0	0	0.0044965	0.0156642	0.018481	0.0415976	0.023074
257.03	0	0	0.0433424	1.444	0	0	0	0	0	0	0	0	0	0	0	0	0	0.0260148	0	0	0	0	0.0166756	0	0	0	0.10467	0	0	0	0	0	0.00443088	0.00658273	0.0110621	0	0.0464119	0	0	0.0652585	0	0.0144136	0	0	0	0.0218674	0	0.0276538	0.0208021
257.96	2.35406	0	0	0	0	0	0	0	0	0	0	0	0	0	0	0.106962	0	0	0	0.0818225	0.0492601	0	0	0.104376	0	0	0	0	0	0	0.00729335	0	0.000696627	0.0347598	0	0	0.0618455	0	0.0302398	0.0407021	0	0	0.0727575	0	0.00111984	0.0194349	0	0.00661441	0
259.06	1.75094	0	0	0	0	0	0	0	0	0	0	0	0	0	0	0.212649	0	0.0114098	0	0.081002	0	0	0.014987	0.133646	0	0	0	0	0.039054	0	0	0	0	0.00890942	0	0	0.0895979	0	0.0270699	0.059742	0	0	0.0280414	0.0215248	0	0	0	0.0134634	0.00173599
260	7.53471	0	0	0	0	0	0	0	0	0.0423594	0	0	0	0	0	0	0	0.029729	0	0	0	0	0.0987106	0	0	0	0	0	0	0	0	0	0.0969001	0	0	0	0.0397835	0.0881177	0.0691327	0.0323289	0	0	0.0592945	0.0393561	0	0	0	0.0462516	0.00419063
260.93	4.3958	0	0	0	1.52118	0	0	0	0	0	0	0	0	0	0	0	0	0	0	0	0.0799632	0	0	0	0	0	0	0	0	0	0	0.0850663	0	0	0	0.07928	0.0530651	0.0240026	0.0793604	0.0297369	0	0.0123373	0.0834574	0.0211439	0.00121142	0.000988515	0.0197187	0.0306396	0.0432993
262.03	0	1.48326	0	1.47902	1.8175	0	0.459761	0	0	0	0	0	0	0	0	0	0	0	0	0	0.0751106	0.0644472	0	0	0	0	0	0	0	0	0	0.065607	0	0	0	0	0	0	0.0553466	0	0	0.00941671	0.0306025	0.043394	0.0444716	0.0244951	0.0162889	0	0.00264472
262.96	0	4.56706	1.96636	0	0	0	0.691659	0	0	0	0.231826	0	0	0	0	0	0	0.00102626	0	0	0.0806173	0.0230529	0	0	0	0	0	0	0	0	0	0.0664805	0	0	0	0	0	0	0.0421629	0.0293354	0.0478889	0	0	0.0487465	0.0226452	0.027769	0	0	0
264.06	0	0	0	0	0	0.248745	0.671035	0.539318	0	0	0.893332	0	0	0	0	0	0	0	0	0	0	0	0	0	0	0	0	0	0	0.0262724	0.0307325	0.0565687	0.0474532	0	0	0.0625767	0	0.000481164	0.0419949	0.0117664	0.0352386	0	0	0.0344644	0	0.0203032	0	0	0
265	0	0	0	0	0	0.402368	1.12998	0.318058	0	0	1.14745	0.436794	0	0	0	0	0	0	0	0	0.00261022	0	0	0.0848932	0	0	0	0	0	0.0658001	0.0661319	0.0887954	0.0754772	0	0	0.0773806	0.0419612	0	0.0578106	0.0474433	0.0255287	0.00984458	0	0.0261056	0	0.0252392	0	0	0.0129471
265.93	0	0	0	0	2.0292	0.904579	1.31171	1.35419	0.191266	0.941965	1.9939	1.5117	0	0	0	0	0	0	0	0	0	0	0	0.141383	0	0.0428581	0.145666	0	0	0.0269572	0	0.0194382	0.00791291	0	0	0.0446269	0.126964	0.0155984	0.0597573	0.00421399	0	0.0130186	0	0.0109396	0.011905	0.0257128	0.00238082	0	0.00545362
267.03	0	0	0	0	3.92864	1.35704	2.86568	2.87517	3.63097	3.24491	3.64325	3.86872	0	0	0	0.369637	0	0	0	0.0324113	0	0	0	0.149112	0	0	0.112625	0	0	0.000572007	0	0	0	0	0	0	0.0982792	0.0663098	0.0212067	0	0.0354451	0	0	0.0244283	0.00418735	0	0	0	0.00863644
267.96	0	0	0	2.4685	1.43118	1.70227	5.27103	6.00568	8.19998	7.18284	7.16418	7.92272	5.59664	0	0	0	0	0	0.0978852	0	0	0.183975	0	0.083776	0	0	0	0	0.0995486	0.0307486	0.0346619	0.0482267	0	0	0	0	0.0219635	0.0879854	0	0	0.0276358	0	0	0.0474672	0	0	0	0.0469476	0
269.06	0	0	0	6.822	4.02973	4.99577	8.35937	10.2305	14.3394	12.2583	11.9874	13.3028	13.3812	0	0	0	0	0	0.0403631	0	0	0	0	0.0377768	0	0	0	0	0	0.0406822	0	0.0578635	0	0	0	0.0518524	0.0222996	0.0720419	0.0168766	0	0.102189	0	0	0	0	0	0	0.0382723	0
270	2.63607	0	0.587983	8.34523	8.2517	10.9748	11.1633	16.0788	20.3818	18.4658	17.4254	19.3553	20.7521	0	0	0	0	0	0	0	0.00881105	0	0	0.162497	0	0.0385974	0	0	0	0	0	0.0079042	0.019521	0	0	0.113469	0.0782645	0.0762692	0.012477	0	0.0482602	0	0.082162	0	0	0.0208899	0	0	0
270.93	2.22134	13.0493	8.38556	6.6559	10.6596	14.2241	15.766	22.9456	28.1407	26.9832	24.855	27.0173	28.6381	0	0	0	0	0	0	0	0.00191704	0	0	0	0	0	0	0.252013	0	0	0	0	0.06896	0	0	0.030038	0.0975799	0.0226634	0.00500591	0	0	0	0.0301947	0	0	0.0369275	0	0	0.000268977
272.03	6.42091	14.9559	9.18932	10.0313	12.1348	17.4147	20.4861	30.1299	38.0685	37.0307	33.7049	36.3345	37.977	22.6696	0	0	0	0	0	0	0.0911247	0	0	0	0.0874931	0	0	0.135255	0.0542226	0	0	0	0.0443838	0	0.0676557	0	0.0686705	0.0300722	0	0	0	0	0	0	0.00187805	0	0	0	0.00478663
272.96	7.93446	13.5647	3.48884	10.6673	18.3103	21.4821	25.8529	37.5402	49.3513	47.5736	42.8505	46.2633	48.1809	44.8439	0	0	0	0	0	0	0	0	0	0	0	0	0.047704	0.108431	0	0.0470642	0	0.0267617	0.0048013	0.00217966	0.127703	0	0	0.00618607	0.00350724	0	0	0	0	0	0.00549298	0	0	0	0
274.06	8.21926	2.45648	6.45018	11.1417	22.2805	26.3271	30.7646	44.9592	57.9792	56.2408	50.4803	54.0258	57.1192	56.9098	0	0	0	0	0	0	0	0	0.072882	0.262883	0.0431209	0.01529	0.227631	0	0	0.0424973	0.023274	0.110368	0	0.0246648	0.0722767	0	0	0	0.0204518	0	0.0288818	0	0	0.00929002	0.027941	0	0	0	0
275	11.4405	4.86247	16.2177	11.6891	26.9324	29.7995	35.2581	52.156	64.0167	63.5404	57.2424	61.0448	63.6833	66.1053	0	0	0	0	0	0	0	0	0	0.263737	0.0621248	0.0586991	0.173483	0.0959071	0	0.0932437	0.0450095	0.0642694	0.017838	0.0338308	0.0330506	0	0	0.0351527	0.0521601	0	0.112872	0	0	0	0.021276	0	0	0	0
275.93	18.8031	14.4837	11.4203	17.3096	26.7582	29.7938	38.6686	56.9437	69.6235	70.1412	63.7411	66.9623	69.4272	73.1027	7.90246	0	0	0	0	0.00612736	0	0.0500571	0	0.0871331	0.103008	0.196235	0	0	0.103172	0.0791977	0	0	0	0.0274631	0	0	0	0.060948	0.0496172	0.0455407	0.0562548	0	0	0	0.00086095	0	0	0	0
277.03	26.4376	19.0073	12.0003	24.112	28.2677	32.4033	42.6443	61.225	75.8248	75.9057	69.4727	72.128	75.8932	79.702	36.0585	0	0	0	0	0	0	0	0.0900817	0.0749682	0.115801	0.113965	0	0.143112	0.108176	0.109923	0	0	0	0.00617771	0	0	0.0617329	0.0100443	0.0343136	0.0539856	0.0279289	0	0	0	0	0.00904015	0.000241155	0.0186237	0
277.96	19.5002	23.9645	15.9794	27.0387	29.5809	37.2968	45.9957	64.7445	82.3463	82.8817	75.7032	77.4492	83.8423	85.6328	52.9979	0	0	0	0	0	0	0	0.0743212	0	0.0605854	0.155809	0	0	0.234819	0.192081	0	0	0	0.0770271	0	0	0.0755609	0.0228173	0.000646251	0.0685208	0.0306211	0	0	0.0100649	0.00687941	0.00501829	0.00406704	0.0135546	0
279.06	11.2043	26.3023	20.2169	26.9436	32.8246	42.6167	49.2203	69.9998	89.5772	89.2146	81.4365	84.194	89.9013	92.0088	61.2603	0	0	0	0	0	0	0	0.00718406	0.0942463	0	0.0617403	0.0913826	0	0.205081	0.109475	0.160598	0	0.00823856	0.073844	0	0	0	0.0309408	0	0.0482005	0	0	0	0.0307566	0.00795007	0.00361556	0	0.0111182	0.0127119
280	16.6745	31.7426	25.4954	29.4549	37.8139	44.6951	51.8072	76.1183	93.2233	94.4	86.6433	89.0339	95.304	97.5812	66.3432	0	0	0	0	0	0.104573	0	0	0.0852431	0	0	0.152859	0	0.181933	0.0655687	0.0651499	0	0.0234375	0.109232	0.0105621	0	0	0.0839459	0	0.0465641	0	0	0	0.0618433	0	0	0	0.0261576	0
280.93	25.2349	23.1109	25.79	36.4009	37.4327	45.7854	54.6339	80.7655	95.921	96.3964	90.2558	91.364	98.9202	101.57	69.907	0	0	0	0	0	0.220411	0	0.139706	0.118958	0.105266	0	0.222944	0.255352	0.00113377	0.106946	0.0636498	0.00557988	0.0177256	0.146879	0.0439611	0	0	0.0573751	0	0.0654364	0	0	0	0	0	0.00191207	0	0	0
282.03	27.5267	18.7817	24.988	37.6144	34.9822	47.5236	56.0116	82.7411	96.2051	98.9592	92.295	93.6174	99.6119	103.481	74.0357	9.42052	0	0	0	0	0	0.125705	0.152069	0.108347	0.080522	0.247575	0.0231842	0.270409	0	0.213133	0	0	0.110782	0.0658662	0	0	0.00884187	0.0438231	0	0.0436526	0.0440419	0	0	0	0	0	0.0254126	0	0
282.96	19.3285	16.8416	21.0491	32.0813	29.7983	48.1384	57.089	81.7204	97.7436	99.1651	93.3414	94.7574	98.7574	103.824	77.3881	23.4582	0	0	0	0	0	0.126028	0.146291	0.0834418	0.0339012	0.312201	0	0.30217	0	0.15625	0	0.0127834	0.109871	0	0	0.0303014	0	0	0	0	0.00726616	0	0	0	0	0	0	0	0
284.06	8.72944	23.0176	27.793	25.4417	35.6827	48.7395	57.5416	81.818	97.4407	98.2974	92.795	93.7392	98.7055	104.431	79.9489	30.1213	0	0	0	0	0	0.100008	0.0139049	0	0.120625	0.079598	0	0.18271	0	0.0528256	0	0.176627	0.00990791	0	0.0658136	0.066852	0	0	0	0.010069	0	0	0	0	0	0	0	0	0
285	12.9845	16.4641	27.8256	27.8368	40.3683	49.5805	59.0573	79.8384	98.4744	97.7904	91.1353	93.2546	99.1145	104.801	81.3211	34.7721	0	0	0	0	0	0.188166	0	0	0.0777634	0	0	0.0631844	0.00315729	0	0.0123003	0.230327	0	0.0261492	0.0559656	0.0903867	0.0887194	0	0.0838759	0.0856217	0	0	0	0	0	0	0	0	0
285.93	21.4237	20.1354	22.6264	32.8931	43.4364	52.6822	61.3794	80.838	97.4117	99.3315	89.8957	94.8751	97.4486	105.513	83.5338	39.7946	0	0	0	0	0	0.0436729	0	0	0	0.222158	0.034733	0.105791	0.0342626	0	0.0764795	0.0902695	0	0	0.0499858	0	0.102833	0	0.0857981	0.0025468	0	0	0	0	0.0115517	0	0.0377774	0	0
287.03	28.8696	15.097	27.5346	33.8892	43.4948	52.7244	63.2995	80.9987	97.8185	99.4059	90.9052	95.4125	97.4474	105.645	86.4311	45.7674	8.73671	0	0	0	0	0	0	0	0	0.16516	0.144019	0.305037	0.337453	0.208776	0.100836	0.163559	0	0	0	0	0.0891685	0.0689438	0.012817	0	0	0	0.0438034	0.0150459	0.0363735	0.0160192	0.0112404	0	0
287.96	29.1992	14.5543	24.8122	24.7936	38.2747	55.4426	64.5125	83.3445	97.4552	98.6534	91.2851	95.3091	97.5784	105.664	90.2427	50.8762	26.8555	0	0	0	0	0	0	0	0	0.103625	0.311949	0.19975	0.205653	0.357826	0.135941	0.186628	0.0178238	0.0653966	0.092102	0.0440804	0.0780639	0.0939755	0	0	0	0	0.0604572	0.0456314	0	0.0277614	0	0	0.0275227
289.06	20.8098	15.8435	25.8869	26.6503	37.6171	58.1848	64.7805	81.9708	97.9047	97.5212	90.1922	94.8593	97.8688	104.909	94.1936	55.1174	34.4685	0	0	0	0	0	0	0.234713	0.0916689	0.0170551	0.251902	0.00685333	0.191248	0.297406	0.000130721	0.147327	0	0.0473602	0.036031	0.0381642	0.144555	0	0	0	0.00455876	0	0	0.0484575	0	0.000316267	0	0	0.00262892
290	4.8257	11.2668	17.1659	31.7209	41.4085	61.537	65.082	80.3247	95.8174	96.3827	89.2138	93.5767	97.089	102.962	97.5812	59.8367	38.8028	0	0	0	0	0	0	0.166773	0.10721	0.257674	0.0865086	0.0579428	0.290664	0.244846	0	0	0	0.0509519	0.0984911	0	0.057206	0	0	0	0.0548854	0	0	0.00751748	0	0	0	0	0.00505419
290.93	0.575633	13.5249	24.8789	35.0166	43.7358	59.5869	65.2857	78.097	94.2878	94.7414	88.1484	89.9708	96.1471	101.441	99.2983	65.3903	43.5992	0	0	0	0	0	0	0.114261	0.0744982	0.0802959	0	0.329032	0.374547	0.0647838	0.0710897	0.0693637	0.0927161	0.0863492	0	0.000157076	0	0.00720147	0	0	0	0	0	0	0	0	0.00398735	0	0.00659068
292.03	0	17.4647	32.8644	26.851	41.7536	61.0299	66.3661	77.7102	90.2921	92.2459	85.6592	87.2696	93.5511	99.5513	98.7424	69.533	48.6993	4.15613	0	0	0	0	0	0.0501397	0.00521243	0.161544	0	0.394079	0.271209	0.0810314	0.0762707	0.066401	0.147035	0.17389	0	0.0981628	0	0.0818284	0	0	0	0	0	0	0	0.0192321	0	0.00421348	0.00786243
292.96	14.411	19.7704	33.0156	25.5978	41.7209	60.9069	66.252	76.2064	87.0102	88.9838	81.6599	84.9932	90.7919	97.1448	98.4576	74.0302	52.9685	16.87	0	0	0	0	0	0	0.185541	0.124813	0.0230768	0.137663	0.0452189	0.0609576	0.0566657	0.152952	0	0.179477	0	0.020993	0.043268	0.0732915	0	0.0219955	0.0367455	0	0	5.07236e-05	0	0.00954322	0	0.00635379	0
294.06	25.2857	19.6433	32.2883	22.6061	44.1409	62.4038	66.0246	74.5287	83.9166	84.7717	79.1744	82.9387	88.0951	93.7528	99.0767	77.5263	55.8643	21.5383	0	0	0	0	0	0	0.189672	0.133927	0	0	0.179522	0.0463319	0.0384007	0.0456408	0	0.0319432	0	0.000738253	0.0826144	0	0.0644304	0	0.0759168	0	0	0	0.004228	0	0	0.00702066	0
295	21.5104	25.591	26.3584	24.6127	36.8807	60.5821	65.7923	72.5924	82.6023	81.1485	75.8991	79.6979	85.5535	91.7674	100.402	80.9036	58.6087	23.2934	0	0	0	0	0	0	0.148998	0	0	0	0.206959	0	0.0218584	0.0478942	0	0.0187237	0	0.0163815	0.133323	0	0.0144602	0	0.0285129	0	0	0	0	0	0	0	0
295.93	8.1555	22.8246	24.8579	20.2865	33.6852	62.56	65.3727	69.349	79.0906	78.448	73.7523	76.974	82.1735	89.8858	100.096	84.1683	61.8402	24.5284	0	0	0	0	0	0	0	0.0175178	0	0.119123	0.199429	0.0139626	0	0	0.0262415	0.110084	0	0.0693178	0.0552087	0	0.085177	0	0	0	0	0	0	0	0	0.00899904	0
297.03	0	11.6526	23.1802	21.5691	36.7648	63.0845	64.5334	66.3513	75.2933	75.6768	70.5017	73.7556	78.8407	87.1159	98.9284	87.4334	64.5581	26.1065	0	0	0	0	0	0	0	0	0	0.259797	0	0	0	0.110669	0.0354695	0.0859979	0	0	0.0217383	0.0310646	0.0517315	0	0	0	0	0.0057865	0	0	0	0.034604	0
297.96	5.2573	27.7249	20.7022	22.3701	41.6278	63.1372	65.0112	64.0045	71.823	72.6278	68.3985	71.2157	76.4055	84.5665	97.767	89.9182	66.6864	27.4426	0.691204	0	0	0	0	0	0	0.0417027	0	0.162059	0	0	0	0.0275475	0.0729013	0.041844	0	0	0	0	0.0348414	0.0423861	0	0	0	0.0440364	0	0	0	0.0231322	0
299.06	25.06	27.6452	18.416	29.1589	36.1228	60.5642	64.8863	62.0095	71.0431	70.309	65.681	68.3493	74.0837	82.9105	97.2911	90.8851	68.8769	28.3751	3.71785	0	0	0	0	0	0	0.130375	0	0	0	0	0	0.143334	0	0.118238	0	0.0493524	0	0.00596289	0	0.000115118	0.120191	0	0	0.0785394	0	0	0	0.0106574	0
300	25.4299	23.4769	16.7486	24.8915	31.2463	60.4349	63.6121	60.0976	68.4029	67.9781	63.3177	66.3891	71.1129	80.418	96.6153	92.2458	70.9303	28.7348	4.89566	0	0	0	0	0	0	0.0919364	0	0.0766227	0	0	0	0.0765029	0.0448343	0.234622	0.00803574	0.14618	0	0.0800867	0	0	0.122397	0	0	0	0	0	0	0	0
301.07	22.3079	6.61962	23.1632	22.2115	29.232	59.1872	61.9741	58.1317	64.5064	64.3981	60.1524	63.2318	67.8953	77.5623	96.6242	90.8877	71.5657	29.6465	5.30844	0	0	0	0	0	0	0.224938	0.0463986	0.0942248	0.110566	0.0158994	0.0383981	0.179971	0.0952204	0.176712	0.104725	0.0678227	0	0.0213468	0	0	0.043083	0	0	0	0	0	0	0	0
302	8.99327	8.17192	15.4371	20.0714	27.2487	59.0632	60.6759	55.9048	60.6322	60.371	56.9024	60.0162	64.7768	74.2698	95.4908	90.7129	71.4078	29.3508	5.37739	0	0	0	0	0	0	0.175846	0.039179	0	0.139898	0.0280889	0.0637503	0.184776	0.0859598	0.0584763	0.00481317	0	0	0	0	0	0	0	0	0	0	0	0	0.0110327	0
303.07	16.8001	6.22649	17.6627	20.736	24.8876	56.926	58.2417	53.0055	58.8426	57.3485	54.0145	56.7143	60.5459	70.5262	93.172	90.18	72.2074	29.5894	5.57195	0	0	0	0	0	0	0	0	0	0.10401	0.0711513	0.156445	0.136619	0	0.0114296	0.0466544	0	0	0	0	0	0.0383135	0	0	0.0979137	0.00253112	0	0	0.0254143	0.0232483
304	13.923	2.50997	15.2092	12.3818	27.9959	55.3326	56.181	50.4661	56.2893	54.773	51.1959	53.9012	57.7421	66.658	90.4738	90.2425	72.8976	29.4337	5.76417	0	0	0	0	0	0	0	0	0	0.161778	0.231434	0.210184	0	0	0.0515588	0.13341	0	0.0451182	0	0	0	0.0614667	0	0	0.124645	0.0319559	0	0	0.0227737	0.0379234
305.07	15.0937	4.59778	21.8928	10.1487	29.6938	53.0638	55.2176	48.5459	53.8335	51.8864	49.3936	51.8378	56.0975	64.6274	89.5476	89.5198	71.8145	30.1182	5.89344	0.230871	0	0	0	0	0	0	0	0	0.256731	0.142393	0.00577687	0	0.0679818	0.0628961	0.110728	0.0259619	0.123862	0	0.00286749	0	0.0411401	0	0	0.0674429	0.0071876	0.0132654	0	0.0364736	0.019978
306	6.44111	16.6903	17.8744	17.2678	22.5515	53.117	54.5315	47.7514	50.8597	49.6465	47.7787	50.2152	53.5809	63.467	87.8972	89.0867	69.6813	30.1071	5.77788	0.453342	0	0	0	0	0	0	0.0563354	0.0268609	0.326836	0	0	0.170118	0.0922831	0.00940941	0.0787973	0.0234493	0.0731212	0.030534	0	0	0.0242518	0	0	0	0	0.053616	0.00886666	0.024455	0.00964873
307.07	0	18.9874	11.5046	19.2928	19.546	53.2082	53.2752	46.2253	49.091	48.3774	45.4465	47.6862	50.6893	60.8663	85.3588	87.8966	69.0571	30.1141	5.79809	0.383059	0	0	0	0	0	0	0.102712	0	0.126671	0	0.115063	0.207379	0.0524309	0.0138486	0	0.0631242	0	0	0	0	0.0112341	0	0	0	0	0.0534907	0	0	0
308	4.018	13.7649	17.0166	23.8989	19.8686	51.3804	51.2352	44.0428	47.6596	46.6287	42.4124	44.3461	48.5512	57.4722	82.9118	86.5249	68.7928	29.3529	5.66392	0.439128	0	0	0	0	0	0	0	0	0.172147	0	0.336019	0.160734	0	0.0549817	0.0942647	0	0.00609009	0	0	0	0	0	0	0	0	0.0162359	0	0	0
309.07	6.11408	13.9017	23.7164	20.8624	20.7711	49.7978	49.578	41.791	46.3172	44.1649	40.6442	42.4724	47.0599	54.5882	80.8401	84.8467	67.6264	28.594	5.66234	0.66378	0	0	0	0	0	0	0	0	0.106378	0	0.254034	0.0504775	0	0.0640343	0.0398583	0	0.0491006	0.0205935	0	0.00871914	0	0	0	0	0.00374379	0	0	0	0.0179054
310	2.33074	19.0099	20.4466	17.7472	17.2719	48.2122	48.7305	41.4694	43.1646	41.781	39.2489	41.3439	44.9824	53.3222	78.0243	83.4778	65.4357	28.1902	5.54379	0.70589	0	0	0	0	0	0	0	0.06656	0.195686	0.00173165	0	0.0723305	0	0.135648	0.0984056	0.0129235	0.0690589	0	0	0.0707596	0	0	0	0.0438911	0	0	0.00888708	0	0.0458719
310.93	2.41347	5.27253	11.1575	9.25805	17.2882	45.9549	47.4359	40.4241	40.7744	40.0711	37.5252	38.8869	42.7871	51.4493	75.5047	81.5425	62.9725	27.485	5.57671	0.678189	0	0	0	0	0	0	0	0	0.135205	0.0206626	0	0.127384	0.093769	0.0995928	0	0.0297733	0.0470059	0.00324946	0	0	0	0	0	0.0348514	0	0	0.0273307	0	0.0105002
312.03	13.4065	7.74494	7.99915	10.7322	17.5656	43.2032	45.2363	38.6823	39.8316	38.1867	36.1223	37.1793	40.3377	49.0695	73.6831	79.3435	61.0744	26.9314	5.77874	0.882417	0	0	0	0	0	0	0	0.0924558	0.102791	0	0.13357	0.047746	0.0320359	0	0.0160143	0.0283835	0.00911417	0	0	0	0	0	0	0.0159833	0	0	0.0139267	0	0
312.96	8.69851	13.2241	12.9259	5.81665	20.5986	42.9765	42.547	35.3956	39.0215	36.8292	34.611	35.5185	38.4286	46.0183	71.4674	76.4696	60.1527	25.7934	5.90885	1.04088	0	0	0	0	0	0	0	0.125741	0.0109336	0	0.234524	0.0236417	0.0254309	0	0.0296363	0	0.0139526	0.038377	0	0	0	0	0	0	0	0	0	0	0
314.06	6.38821	11.5019	14.508	10.5342	19.5492	43.1089	41.8533	33.5554	36.8975	35.0038	32.7474	34.4018	36.9652	43.9286	68.5652	74.2523	58.8546	24.485	5.67656	1.14227	0.294507	0	0	0	0	0	0	0.138969	0	0	0.00484144	0	0.0314708	0	0.146989	0.00163739	0.029297	0.0774437	0	0.03058	0	0	0	0	0	0	0	0	0
315	3.17404	2.37154	10.4448	9.54286	18.0838	41.4994	41.0016	32.9175	33.9624	34.006	30.9093	32.6194	35.6702	42.4516	65.6297	72.1563	57.3348	23.225	5.51469	1.06406	0.41684	0	0	0	0	0	0	0	0	0	0	0	0.0584676	0	0.0745253	0	0	0.101244	0	0.0647986	0	0	0	0.00748142	0	0	0	0	0.01217
315.93	8.2058	4.27442	6.0439	12.028	15.8319	39.208	40.3657	32.6083	31.9635	33.0794	29.9673	31.3706	34.1888	40.9286	63.3508	69.8738	55.2696	22.6658	5.38185	1.23665	0.359158	0	0	0	0	0	0	0	0.0133484	0	0	0	0	0	0.0430277	0	0	0.0461039	0	0.0122434	0	0	0	0	0	0	0	0	0.0189997
317.03	5.29312	6.67069	8.9973	8.26753	19.004	37.5226	38.3898	31.4123	30.6573	31.4989	28.1921	29.519	32.6557	39.0498	60.7676	67.416	53.8044	22.3875	5.3137	1.26645	0.38942	0	0	0	0	0	0	0	0	0.00755975	0	0.035793	0	0	0	0	0	0	0.017885	0	0	0	0	0	0	0	0	0	0.0129155
317.96	8.35156	5.16626	13.9917	10.9187	17.5125	35.9467	36.3853	29.692	29.2375	29.2598	26.7941	28.4083	30.455	37.0773	57.7218	64.6587	51.4221	21.5794	5.10147	1.42456	0.461261	0.0982102	0	0	0	0	0	0	0	0	0.00274599	0	0	0	0	0	0.0252189	0	0.0700975	0	0	0	0	0	0	0	0	0	0
319.06	8.4024	7.12507	12.6235	11.4297	16.9704	34.5247	33.8814	28.5618	28.1669	27.6524	25.671	27.2936	28.8921	35.4884	55.4169	61.4356	49.9465	20.981	4.7734	1.36803	0.519622	0.0597746	0	0	0	0	0	0	0	0	0	0	0	0	0	0.0627955	0	0	0.0316436	0	0	0	0	0	0	0	0	0	0
320	6.68933	9.79089	8.61204	8.29334	13.5718	31.9076	32.7262	26.9377	26.893	26.5351	24.8524	26.5947	27.714	33.8391	54.3389	58.7677	48.2057	20.2181	4.22942	1.37406	0.557556	0	0	0	0	0	0	0	0	0	0	0	0.0230067	0	0.0424388	0	0	0	0.000313029	0.0400288	0	0	0	0	0	0	0	0	0
320.93	10.0807	0.205421	7.26355	3.3767	12.1355	30.1053	31.6867	26.1207	25.5981	25.3031	23.6503	24.5631	26.6429	31.9283	52.1899	56.2996	46.4319	20.1639	3.83281	1.42524	0.649336	0	0	0	0	0	0	0	0	0	0	0.0919432	0.136428	0	0	0	0	0	0	0.0436387	0	0	0	0	0	0	0	0	0
322.03	12.6856	0	11.7283	6.00551	12.9297	29.8221	29.689	24.0147	24.6495	24.3935	22.3338	23.5302	25.0474	30.3708	48.9799	54.921	44.3823	19.6778	3.72669	1.35582	0.726918	0.179574	0	0	0	0	0	0	0	0	0	0	0.100882	0.0724018	0	0	0	0	0.0522435	0	0	0	0	0	0	0	0	0.0029205	0
322.96	11.8708	0	9.30354	9.27153	11.969	28.6016	28.0985	23.0809	24.3574	23.3609	21.3193	22.6581	24.2613	28.8967	46.2555	52.3906	41.8006	19.0393	3.79383	1.4803	0.867683	0.423427	0	0	0	0	0	0	0	0.00359893	0	0	0	0.0448739	0	0	0	0	0.0327853	0	0	0	0	0	0.00512561	0.00550209	0	0.00171561	0
324.06	6.87414	5.47076	8.61089	9.24462	11.0412	27.7645	26.661	22.0128	23.1338	22.2134	20.1854	22.1765	23.3168	27.3504	44.2836	49.5804	39.7624	18.3922	4.04688	1.52411	1.06734	0.555486	0.0358255	0	0	0	0	0	0	0	0	0	0	0	0.00292349	0.0326345	0.0204159	0	0	0	0.0176643	0	0	0	0	0	0	0.0129454	0
325	0	4.95323	5.82178	7.63579	11.2545	26.4086	25.7911	21.0155	21.7871	21.1243	19.4326	20.5189	21.9301	25.5586	42.6871	47.0722	38.5333	18.1306	4.26602	1.57799	1.23792	0.663603	0.088719	0	0	0	0	0	0	0	0	0.05086	0	0	0	0.0137733	0.0488761	0	0	0	0.023525	0	0	0	0	0	0	0	0
325.93	0	4.40547	0	6.25112	13.02	26.0337	23.8596	19.347	20.5006	20.4199	18.7457	19.3269	20.6722	24.4238	41.0183	45.5638	37.1776	17.7736	4.57236	1.26029	1.46486	0.708983	0.110067	0	0	0	0	0	0	0	0	0	0	0.0343671	0	0	0.0192497	0	0	0	0	0	0	0.0359483	0	0	0	0	0
327.03	0.135471	0	0	4.85202	12.2536	23.321	23.5041	18.2833	19.4865	19.5342	17.9113	17.9854	20.1988	23.773	39.2116	43.5555	35.1108	16.9224	4.89909	1.36501	1.53815	0.798261	0.314638	0	0	0	0	0	0	0	0	0.0443835	0	0.119251	0.0617418	0	0.0636394	0.0379181	0	0	0	0	0	0.087078	0	0	0	0	0
327.96	6.38735	0	0	0	10.1368	20.1746	22.5964	17.7754	18.9902	18.6307	16.8482	17.3235	19.1138	22.7798	36.8556	41.1396	33.3833	16.0833	4.95326	1.44807	1.53685	1.05023	0.372813	0	0	0	0	0	0	0	0	0.0932159	0	0	0.0826431	0.026022	0.0573585	0.0247825	0.0246352	0	0	0	0	0.0407658	0	0	0.0225661	0	0
329.06	4.85578	0	4.72958	0	8.35483	18.503	21.2855	16.8009	18.6503	17.6956	15.8432	16.7925	17.8912	21.6231	35.5775	39.0182	32.2117	15.4537	5.00356	1.66827	1.42927	1.16889	0.48999	0	0	0	0	0	0	0	0	0.131265	0	0	0.0182353	0.122334	0	0	0.00763572	0	0	0	0	0.0240762	0	0	0.0123206	0.00635844	0
330	4.16381	4.12625	8.5377	2.3319	10.911	19.1261	20.2772	17.2459	17.6497	16.8271	15.5125	15.9896	17.09	20.6283	34.1981	37.1459	30.7003	15.5753	5.04304	1.6911	1.6117	1.39743	0.725386	0.095648	0	0	0	0	0	0	0	0	0	0	0	0.101055	0	0	0	0	0	0	0	0	0	0.0432029	0	0.00377197	0.00153071
331.07	0	0	9.93505	5.79269	9.96974	19.9687	18.9248	17.2229	15.9385	15.5848	14.7996	14.797	16.6661	19.9684	33.0446	35.7353	28.8938	15.346	5.42787	2.14886	1.68968	1.71704	0.970467	0.135504	0	0	0	0	0	0	0	0	0	0.0330545	0	0.0721962	0	0	0	0	0	0	0	0	0.00537401	0.0272411	0	0	0.0286307
332	0	1.91715	4.349	1.42136	7.8816	19.187	17.544	15.6832	14.7275	14.9154	14.065	14.2061	15.9905	19.2185	30.5871	34.5886	27.8491	14.7821	6.00121	2.45579	1.64988	1.9119	1.07967	0.105148	0	0	0	0	0	0	0	0	0	0	0	0	0	0	0	0	0	0	0	0	0	0.00984248	0.00557413	0.00158244	0
333.07	0	5.38376	1.85412	0	6.72129	16.7924	16.5201	13.8127	14.166	14.2976	12.8591	13.9085	15.2329	18.419	29.2529	33.2307	26.9299	14.0339	6.21479	2.91981	1.4037	1.93016	1.16544	0.428668	0	0	0	0	0	0	0	0	0	0	0	0	0	0.0145355	0	0	0	0	0	0	0.00701805	0	0	0	0
334	0	1.86996	4.26188	0	3.32244	15.503	16.5682	13.8656	13.9632	13.8312	12.3036	13.2105	14.5564	17.6287	27.5959	31.9101	25.9065	13.8776	6.11836	3.08968	1.55538	1.87819	1.24424	0.542923	0.18358	0	0	0	0	0	0	0	0	0	0	0	0	0	0	0.00747931	0	0	0	0	0	0	0	0	0
335.07	0	0	6.06101	0	2.00481	13.7217	15.9032	13.1972	13.2743	12.9534	11.7775	12.2549	13.9976	16.9193	26.4495	30.558	24.6474	13.8782	5.92476	3.67731	1.89724	1.81002	1.27749	0.740493	0.276316	0	0	0	0	0	0	0	0	0	0	0	0	0	0	0	0	0	0	0	0	0	0	0	0.0103078
336	7.72108	0	5.38876	3.24461	0.86339	13.1238	14.5728	11.9808	12.9342	12.376	11.7308	11.6649	13.23	15.6945	24.6627	29.3537	23.7985	13.6314	6.30911	4.16846	2.25268	2.1323	1.75712	0.946272	0.530374	0	0	0	0	0	0	0	0	0	0	0	0.0621332	0	0	0	0.00494215	0	0	0	0	0	0	0	0.0216961
337.07	0.60014	2.98577	4.02771	4.66181	2.14015	10.7449	13.2907	11.0887	12.3972	11.6527	11.1261	11.7154	12.5096	14.6283	24.3404	27.7989	23.2265	13.1618	6.30596	4.98232	2.7646	2.45267	1.86362	1.35315	0.699489	0	0	0	0	0	0	0	0	0.00946602	0	0	0.104802	0	0	0	0	0	0	0	0	0	0	0	0.00386608
338	0	4.15998	1.34497	0	3.19344	10.5094	12.6451	10.9942	11.4577	11.2099	10.5316	11.7124	11.7047	13.9699	23.6018	26.3577	22.6956	12.8	6.45214	5.10579	3.39239	2.56257	1.9568	1.5685	0.911538	0.273482	0	0	0	0	0	0	0	0	0	0	0	0	0	0	0	0	0	0	0	0	0	0	0
339.07	1.02442	5.67724	1.63218	0	7.96835	12.1868	12.0301	10.2523	10.6914	10.8475	9.71949	11.352	10.817	13.5833	22.6586	25.4108	22.1251	13.0759	6.71621	5.23041	3.8342	2.40161	2.06292	1.65461	0.986828	0.801771	0	0	0	0	0	0	0	0	0	0	0	0	0	0	0	0	0	0.0260743	0	0	0	0.00781402	0
340	7.99867	0	0.0770419	0	7.92742	12.5069	12.1003	10.6367	10.7541	10.5855	9.37814	10.4512	10.1991	13.151	21.7773	25.1798	21.6914	13.1396	7.36579	5.43114	4.10443	2.5691	2.67164	1.63952	1.2698	0.789035	0	0	0	0	0	0	0	0	0.02192	0	0	0	0	0.0477216	0	0	0	0.0275716	0	0	0	0	0
340.93	8.41926	0	4.60038	0	6.51487	10.6956	12.1367	11.0728	10.7963	10.1086	9.04768	9.75368	9.89471	12.4986	21.1429	24.5163	21.5193	13.2601	7.76005	5.94215	4.49537	2.86268	2.90938	1.98572	1.58282	0.756095	0.0423384	0	0	0	0	0	0	0	0	0	0	0	0	0	0	0	0	0	0	0	0	0	0
342.03	1.5974	0	0	0	3.94671	8.65781	11.5215	10.6861	10.9231	9.45217	8.41938	8.79903	9.75293	12.0309	20.5162	23.7201	20.8394	13.3284	8.02822	6.12838	5.20956	3.21581	2.95975	2.41817	1.80254	0.708334	0.0632691	0	0	0	0	0	0	0	0	0	0	0	0	0	0	0	0	0	0.00712733	0	0	0.00784649	0
342.96	0	0	0	0	2.23005	8.97772	10.3244	10.0206	10.5755	8.63263	7.93199	8.38003	9.59811	11.223	19.4073	22.857	20.1534	13.4145	8.31725	6.48895	5.67242	3.58296	3.12473	2.9614	2.07145	1.16409	0.113073	0	0	0	0	0	0	0	0	0	0	0	0	0	0	0	0	0	0	0	0	0.0223699	0
344.06	0	2.14221	0	4.59179	2.555	8.44886	10.1069	9.94863	10.0618	8.19146	7.56789	8.14891	9.0223	10.6928	18.7517	22.3967	19.7396	13.0817	8.77491	6.93039	6.01935	4.12747	3.53021	3.30381	2.26466	1.73862	0.46015	0	0	0	0	0	0	0	0	0	0	0	0	0	0	0	0	0	0	0	0	0.0131422	0
345	0	4.44416	10.0527	0	1.4639	8.5784	10.9448	9.55946	9.49591	8.10029	7.52434	7.82635	8.43284	10.2674	18.1187	21.672	19.7866	12.7879	9.24293	7.35799	6.21184	4.92535	3.73099	3.6481	2.7605	2.16034	0.862364	0	0	0	0	0	0	0	0	0	0	0	0	0	0	0	0	0.0258678	0	0.0138447	0	0.00237126	0.00687284
345.93	0	0	0	0	3.36251	8.76594	10.7271	8.30269	8.93708	8.03161	7.01701	7.21789	8.08714	9.96979	17.8234	21.6061	19.6922	12.9621	9.37404	7.74918	6.67868	5.39556	3.88386	3.90726	3.15129	2.40386	1.21452	0.388152	0	0	0	0	0	0	0	0	0	0	0	0	0	0	0	0	0	0	0	0.00629917	0.0107977
347.03	0	0	2.74551	0	5.85414	9.3145	10.5546	8.68115	8.24997	7.55612	6.67028	7.01848	7.9188	9.57287	17.3388	21.3221	19.7266	13.7397	9.78375	8.20209	7.00092	5.75959	4.1088	4.18244	3.45223	2.56712	1.50075	0.50667	0	0	0	0	0	0	0	0	0	0	0	0	0	0	0	0	0	0	0	0	0
347.96	4.32506	0	0.0955367	0.100982	5.0926	8.88607	9.73797	8.84138	8.10086	7.33765	6.33367	6.90386	7.34613	9.22558	17.42	21.0257	19.3117	14.3373	10.0073	8.93639	7.39778	6.3382	4.6753	4.31854	3.8048	2.94344	1.85024	0.68851	0	0	0	0	0	0	0	0	0	0	0	0	0	0	0	0	0	0	0	0	0
349.06	10.1083	6.1297	5.96648	0	4.27933	7.88112	8.98812	8.55973	8.29278	7.42468	6.34893	6.42706	7.14054	9.24536	17.096	20.4984	19.0454	14.4113	10.7038	9.571	8.02822	7.00296	5.31411	4.42968	4.55548	3.38221	2.3275	1.22152	0	0	0	0	0	0	0	0	0	0	0	0	0	0	0	0	0	0	0	0	0
350	6.20489	8.8242	0	0.433737	5.11382	7.25735	8.67628	7.07646	7.97253	7.15194	5.98181	5.92552	7.15304	8.8166	16.6528	20.659	19.0677	14.5509	11.1416	10.169	8.50878	7.81931	6.09496	5.12058	5.1947	4.00463	3.01954	1.77832	0.369433	0	0	0	0	0	0	0	0	0	0	0	0	0	0	0.00759663	0	0	0	0	0
351.07	0	0	0	0	5.08876	7.51994	9.16509	7.772	7.66746	6.61242	5.84771	5.76718	6.87056	8.41595	16.2891	20.6721	19.4208	15.1911	11.7749	10.5865	9.09381	8.23343	7.06607	5.82577	5.39621	4.587	3.68684	2.16402	0.848484	0	0	0	0	0	0	0	0	0	0	0	0	0	0	0	0	0	0.00522058	0	0.000520594
352	0	0	0	0	3.97431	7.06047	9.2172	8.0895	7.24784	6.17959	5.53812	5.4738	6.46897	8.40147	16.2543	20.6539	19.3309	15.6206	11.8978	11.1805	9.82851	9.00987	8.18341	6.51307	6.24377	5.36117	3.95792	2.6317	1.2266	0	0	0	0	0	0	0	0	0	0	0	0	0	0	0	0	0	0.0222909	0	0.0121901
353.07	0	4.43709	7.3424	0	2.29439	6.03464	8.76902	9.13275	6.80374	6.37157	5.43245	5.34663	6.21394	8.51541	16.1582	20.7213	19.4657	15.7764	12.3883	11.8928	10.5351	9.57864	9.07692	7.07354	7.03094	6.23842	4.29159	3.20381	1.54653	0	0	0	0	0	0	0	0	0	0	0	0	0	0	0	0	0	0	0	0.00705399
354	0	12.0289	4.12203	0	0.539474	8.47743	8.9279	8.37777	6.77819	6.06952	5.33654	5.20321	5.74951	7.95913	16.0161	20.8607	19.7123	15.9136	13.1817	12.3221	11.005	10.8052	9.79313	8.10303	8.21225	7.0664	5.21337	4.1978	2.28237	0.0154574	0	0	0	0	0	0	0	0	0	0	0	0	0	0.0144336	0	0	0	0	0
355.07	0	6.38039	0	0.238866	2.06915	8.6513	8.88278	8.18475	6.62341	5.81986	5.31911	4.93937	5.30514	7.64889	16.1382	20.7865	19.9076	16.7845	14.0166	12.7641	11.6764	11.4787	10.5141	9.13523	8.53254	8.07867	6.22331	4.72887	2.67905	0.911073	0	0	0	0	0	0	0	0	0	0	0	0	0	0.012597	0	0.0445337	0	0	0
356	0	1.32	0	0	3.90769	9.29896	9.39134	7.9531	6.9747	5.28845	4.66757	4.79108	5.22984	7.32848	16.3725	20.7105	19.5585	17.3389	14.5436	13.1772	12.4967	12.3286	11.6469	9.88924	9.14753	8.89075	7.03246	5.38717	3.18379	1.48077	0	0	0	0	0	0	0	0	0	0	0	0	0	0	0	0	0	0	0
357.07	1.53632	0	0	0	4.2213	8.28068	9.33145	8.25135	6.76384	5.29229	4.20827	4.76022	5.27504	7.37716	16.333	20.7427	19.7374	17.564	14.9964	14.2922	13.1816	12.7612	12.3869	10.7277	9.69925	9.74623	7.6092	6.09952	4.104	2.02642	0	0	0	0	0	0	0	0	0	0	0	0	0	0	0	0	0	0	0
358	4.18894	0.152774	0	0	0	9.9231	10.3332	7.19186	6.92954	5.19616	4.20157	4.56631	5.1051	6.99883	16.1834	20.8254	20.4607	17.8408	15.4169	15.2787	14.2647	13.4994	13.0973	11.9519	10.8462	10.499	8.56983	7.13906	5.18312	2.58706	0	0	0	0	0	0	0	0	0	0	0	0	0	0	0	0	0	0	0
359.07	5.08185	3.52762	0	0	0	8.59211	9.88963	8.09772	6.49911	5.05101	4.46424	4.17078	4.73883	6.90305	15.9269	21.4484	20.9297	18.4697	16.0449	16.0962	14.9693	14.2815	13.9453	12.9823	11.4623	11.4641	9.99476	8.04697	5.98989	3.13355	0	0	0	0	0	0	0	0	0	0	0	0	0	0	0	0	0	0	0
360	5.28002	1.16059	0	5.62575	0.0858675	9.95325	9.83054	8.96495	7.05333	4.7607	4.59719	4.04232	4.65899	6.55303	15.9108	22.1393	20.9513	19.0558	16.5253	16.4707	15.3949	15.2603	15.0071	13.6217	12.4319	12.1298	11.4133	9.20159	6.40801	3.81338	1.11525	0	0	0	0	0	0	0	0	0	0	0	0	0	0	0	0	0	0
361.07	0	0	4.3895	3.76427	2.21	8.49897	9.98993	9.58848	6.96896	4.82134	4.43508	4.05058	4.84981	6.5001	16.1114	22.3711	21.2561	19.0776	17.2219	16.9577	15.7843	16.4383	15.9758	14.4636	13.7067	13.4155	12.1916	10.2234	7.14308	4.36259	1.71931	0	0	0	0	0	0	0	0	0	0	0	0	0	0	0	0	0	0
362	0	0	1.36265	1.56947	4.081	8.41874	10.5057	8.86368	7.1187	4.94858	4.10812	4.09995	4.9287	6.33533	16.492	22.2955	22.0049	20.2312	18.0734	17.9557	17.0298	17.4428	16.9873	15.732	15.2112	14.508	13.059	11.1232	8.0054	5.13498	2.25242	0	0	0	0	0	0	0	0	0	0	0	0	0	0	0	0	0	0
363.07	0	0	0	0	3.66823	7.12477	10.3016	8.87007	6.32258	4.81129	4.04153	3.784	4.65591	6.32733	16.8481	23.0908	22.2511	20.662	18.8203	18.8147	18.1027	18.3128	18.2697	16.8201	16.8018	15.6105	14.5428	12.1952	9.0986	6.00827	2.64209	0	0	0	0	0	0	0	0	0	0	0	0	0	0	0	0	0	0
364	8.66262	3.48384	2.31671	0	3.2978	6.73556	10.829	9.49458	6.39395	4.60009	4.21041	3.45698	4.41538	6.71656	16.923	23.6168	22.6713	21.2584	19.4962	19.7869	18.8989	19.2165	19.4365	17.9535	18.188	16.5464	16.1318	13.8316	9.80996	7.05406	3.22258	0.0424353	0	0	0	0	0	0	0	0	0	0	0	0	0	0	0	0	0
365.07	5.63748	0	3.72647	0	2.70559	6.45368	11.9588	10.2993	6.85192	4.95524	4.00227	3.41605	4.41362	6.71558	17.3187	24.3122	23.3788	20.9213	19.897	20.3678	19.4524	20.2127	20.5393	19.4147	19.4058	17.9982	17.3975	14.6946	10.6498	7.49996	3.69169	1.03916	0	0	0	0	0	0	0	0	0	0	0	0	0	0	0	0	0
366	0	0	0	1.12718	4.59612	9.63652	12.0273	10.1684	7.30416	5.36552	3.80791	3.72098	4.3248	7.01819	17.3869	24.7401	24.0204	21.9869	20.8885	21.0918	20.0398	20.9904	21.8482	20.7537	20.3738	19.4256	18.2596	15.7985	12.0045	8.00314	4.45322	1.80895	0	0	0	0	0	0	0	0	0	0	0	0	0	0	0	0	0
367.07	0	0	0	0	2.54941	10.4097	12.704	9.8626	6.63362	5.1574	3.94145	3.80247	4.09708	6.70572	17.565	25.0441	24.3416	22.9901	21.6598	21.3528	20.9225	22.0086	22.775	21.8221	22.2326	20.4697	19.2192	16.966	13.6505	8.97644	4.92715	2.18328	0	0	0	0	0	0	0	0	0	0	0	0	0	0	0	0	0
368	0	0	2.32948	0	0.377923	9.45148	13.917	10.929	6.47756	4.73837	3.84682	3.77825	4.154	7.09902	17.3838	25.3544	24.9204	23.7878	22.633	22.3789	21.9178	22.9179	23.9151	22.8433	23.7842	21.8287	20.2815	18.1085	14.5223	10.072	5.60425	2.51521	0	0	0	0	0	0	0	0	0	0	0	0	0	0	0	0.0107712	0
369.07	0	0	4.70725	0	0	10.0882	14.8199	11.9815	6.85871	4.64581	3.70322	3.56152	4.12467	7.09656	17.6106	25.8864	25.4063	23.9868	23.1036	23.6567	23.2103	24.0581	25.2862	23.6175	25.2186	23.9338	21.9069	19.5297	15.2664	10.9018	6.20531	2.66091	0.316547	0	0	0	0	0	0	0	0	0	0	0	0	0	0	0	0
370	0	0	7.20664	0	5.19144	11.4098	14.6513	11.9	7.60483	4.61815	3.79718	3.59913	4.32449	7.46804	18.133	26.4235	26.1695	24.2174	23.5721	25.0055	24.2392	25.3253	26.9578	24.9293	26.5418	25.8397	23.3186	20.928	16.0639	11.6362	7.17394	3.13861	1.04473	0	0	0	0	0	0	0	0	0	0	0	0	0	0	0	0.00482434
371.07	2.90664	0	8.42311	0	4.44599	11.5678	15.0708	11.8042	7.73489	4.66007	3.92814	3.74274	4.36411	6.77827	18.6621	26.5944	26.8971	25.1574	24.2834	25.4728	25.3583	26.4807	27.7392	26.4897	28.375	27.1066	24.676	21.9107	17.4999	12.398	7.92417	3.61817	1.50951	0	0	0	0	0	0	0	0	0	0	0	0	0	0	0	0
372	9.1361	0	5.62399	0	1.99551	11.4406	15.508	11.6125	7.94246	4.84846	3.73183	3.84552	4.17889	6.67887	19.1207	27.734	27.1949	25.6612	25.619	26.2212	26.2828	27.305	28.4522	28.209	29.8522	28.5089	25.9286	22.6937	18.7657	13.4695	8.69488	4.38075	1.81543	0	0	0	0	0	0	0	0	0	0	0	0	0	0	0	0
373.07	5.25199	0	0	0	1.3521	12.79	16.6517	12.4733	7.77014	5.07968	3.64381	3.32885	3.85201	6.93643	19.0678	27.985	27.2055	26.4645	26.7193	26.9193	27.2214	28.4746	29.4549	29.0605	30.5023	30.5152	27.3797	24.6432	20.1233	14.5738	9.2178	4.85063	1.94785	0	0	0	0	0	0	0	0	0	0	0	0	0	0	0	0
374	0	0	0	3.56535	1.61052	13.5274	15.9398	12.6959	7.78881	4.89454	3.55708	3.44135	4.0288	7.0706	19.3207	28.4208	27.9719	27.1359	27.1567	27.9419	28.1919	29.8741	31.0353	30.3921	31.6409	32.0279	28.5851	26.2423	21.3646	15.6723	9.87716	5.35245	2.3547	0.0701361	0	0	0	0	0	0	0	0	0	0	0	0	0	0	0
375.07	0	9.92886	0	1.71261	1.20325	12.6034	15.3312	13.621	7.78828	5.17953	3.46067	3.448	4.18639	6.84295	19.5306	28.8968	28.7389	28.4207	27.5926	29.1892	28.8775	30.8781	32.4885	31.7767	33.178	33.3937	29.7859	27.367	22.7276	16.0522	10.4037	5.6563	2.75974	0.37628	0	0	0	0	0	0	0	0	0	0.00950201	0	0	0	0	0
376	0	9.17309	0	6.00919	0	12.423	15.88	14.5258	8.1345	5.13993	3.67711	3.477	4.06672	6.75894	19.9499	29.6661	28.9218	28.9922	28.9233	30.8838	29.869	32.4741	33.9742	33.1049	34.7058	34.5024	31.6292	28.6083	23.5118	16.9922	11.0774	6.01741	3.21481	1.05162	0	0	0	0	0	0	0	0	0	0	0	0	0	0	0
377.07	0	4.63065	0	1.45327	0.549374	11.4692	18.1752	15.1342	8.18147	4.97504	3.8682	3.54473	3.79441	6.89879	20.6067	29.8897	29.2541	29.4066	29.8408	31.531	30.9117	33.6957	34.5233	34.4669	36.4349	35.8238	33.4574	30.0025	24.2986	18.0475	11.8518	6.65811	3.59291	1.56177	0	0	0	0	0	0	0	0	0	0	0	0	0	0	0
378	0	7.83846	7.41328	3.39161	0	13.1592	19.4904	14.2612	7.692	4.96359	3.77596	3.68826	3.9963	6.81423	20.979	30.2279	30.081	29.7559	30.557	31.9291	32.5232	34.6234	35.9377	35.4221	37.3709	37.065	34.7884	31.5604	25.8592	19.7429	12.9038	7.21015	3.97361	1.81993	0	0	0	0	0	0	0	0	0	0	0	0	0	0	0
379.07	13.2826	7.84331	3.17178	2.25975	1.92086	14.513	19.5485	14.864	8.32106	5.26691	3.66361	3.32392	4.09115	7.03152	21.1999	30.7101	30.6808	30.2677	30.9479	32.8341	33.2401	35.0561	36.9466	35.9545	38.0035	38.5897	35.9385	32.2691	27.3806	20.8083	13.7254	7.96066	4.34912	1.97024	0	0	0	0	0	0	0	0	0	0	0	0	0	0	0
380	11.6479	8.16601	3.04011	7.08089	3.00904	16.6221	19.2859	16.2552	8.92307	5.46053	3.96234	3.35066	4.10378	7.20743	21.0822	30.7831	31.4497	30.9042	31.8547	34.1467	34.0501	36.2336	38.0923	37.3121	39.0219	39.7906	37.6383	33.5631	28.2683	21.868	14.475	8.76049	4.72675	2.2242	0.398049	0	0	0	0	0	0	0	0	0	0	0	0	0	0
381.07	9.40674	0	1.53734	8.83505	1.63393	16.731	20.3845	16.2904	9.29055	5.20923	4.28546	3.28008	3.89075	7.18146	21.8021	31.2739	31.6395	31.887	32.7045	35.0629	34.7499	37.5351	38.8417	39.035	40.5475	41.1813	39.5181	34.3916	28.9321	22.4003	15.1599	9.5171	5.03813	2.8006	0.780181	0	0	0	0	0	0	0	0	0	0	0	0	0	0
382	1.91094	4.89332	3.46095	4.02798	2.23637	17.0923	21.1322	16.5124	8.47137	5.22564	4.03517	3.08833	3.98747	6.87978	22.0933	32.2772	32.1812	32.683	33.8816	36.3531	36.2389	38.8539	40.8105	40.2198	41.693	42.7977	41.1504	36.115	29.782	23.3705	15.8429	9.91857	5.37086	3.41758	1.15415	0	0	0	0	0	0	0	0	0	0	0	0	0	0
383.07	0	5.76017	3.21884	0	4.50397	17.9563	21.1384	17.5693	9.23861	5.20227	3.70583	2.81327	4.05508	6.91352	22.3473	33.1329	32.706	33.1745	34.4926	37.3235	37.2075	40.0339	41.8127	40.8477	42.604	44.366	42.0551	37.2422	30.2074	23.7628	16.6885	10.5287	5.95725	3.73377	1.56073	0	0	0	0	0	0	0	0	0	0	0	0	0	0
384	3.03287	0	0	0	5.67358	18.1077	21.0529	18.629	9.65682	5.17816	3.19878	3.14533	4.16351	6.88727	22.6097	33.1702	33.1116	33.6228	35.2546	38.0458	38.7257	40.7558	42.6377	42.2211	43.8585	45.3118	42.9752	38.8592	31.2075	24.5953	17.7858	11.2751	6.92699	4.01429	2.03863	0.18886	0	0	0	0	0	0	0	0	0	0	0	0	0
385.07	4.20383	0	0	0	3.50447	18.0751	23.0272	18.5245	10.5922	5.16181	3.71875	3.22183	4.12267	7.12598	22.971	32.8558	33.3729	34.3016	35.9212	38.4373	39.7825	41.5395	43.2299	43.8005	44.8086	45.9666	44.1845	40.1438	33.1792	25.7403	18.5445	11.9867	7.66811	4.45711	2.44958	0.579198	0	0	0	0	0	0	0	0	0	0	0	0	0
386	3.2053	0	0	3.0973	1.10499	16.4413	23.2869	18.6008	10.9479	5.54658	3.9383	3.56563	4.2808	7.23745	23.1487	33.7345	33.6666	34.7946	36.2849	39.4222	40.7626	42.7536	44.874	44.1976	45.7827	47.4007	45.5652	41.3858	35.1489	27.2229	19.5598	12.7567	8.2278	4.91492	3.14156	1.00618	0	0	0	0	0	0	0	0	0	0	0	0	0
387.07	0	4.87985	0	1.33883	2.83702	17.3876	23.6125	18.5533	11.2446	5.68066	4.14911	3.80686	4.30306	7.55398	23.2617	34.5406	34.8567	35.4531	36.514	40.2915	41.1594	43.9747	45.5177	44.7451	46.7716	48.207	46.7315	42.7824	36.4882	28.1964	20.6667	13.6193	8.57914	5.48075	3.82565	1.41398	0	0	0	0	0	0	0	0	0	0	0	0	0
388	0	6.63702	0	0	5.19588	19.4	23.361	19.1742	10.9745	5.73561	3.68292	3.68509	4.43942	7.67217	23.0925	35.3795	35.264	35.6815	37.5115	40.9734	42.5707	45.3018	46.1926	45.8383	48.6361	49.0705	47.9321	44.403	37.1865	28.8247	21.7129	14.405	9.43638	5.92806	4.30175	1.84733	0	0	0	0	0	0	0	0	0	0	0	0	0
389.07	0	3.89778	0.332078	0	6.98832	18.9031	24.2225	18.7971	10.4733	5.78727	4.32283	3.3111	4.14526	7.61297	23.539	35.5714	35.7464	36.1639	38.6092	42.1761	43.2196	46.3316	46.8484	47.142	50.1738	49.5724	48.4471	45.5758	38.6531	29.7629	22.3964	14.9312	10.1338	6.60701	4.70461	2.43403	0.294723	0	0	0	0	0	0	0	0	0	0	0	0
390	0	0	0	0.414075	3.50633	16.9426	24.0341	18.6673	10.7211	6.01407	4.54757	3.24719	3.92435	7.35045	23.7294	36.403	36.1324	37.1294	39.1386	43.3514	44.2149	47.2578	48.0793	47.8885	51.0691	50.9041	49.5368	46.1976	39.7711	30.733	23.3107	15.6811	10.8137	7.46769	5.0928	3.20449	1.22296	0	0	0	0	0	0	0	0	0	0	0	0
391.07	9.76539	0	5.14873	0.861946	1.04117	17.8331	24.2919	19.217	10.9622	5.96693	4.46138	3.12247	3.88024	7.41248	23.8304	36.4451	36.9892	37.4419	39.3807	44.2672	44.1545	47.9258	48.8655	48.8051	51.0998	51.8588	50.6915	47.1971	41.1347	31.9974	24.1	16.4404	11.5724	8.56115	5.81657	3.62506	1.8306	0	0	0	0	0	0	0	0	0	0	0	0
392	17.1683	5.31374	12.9451	0	0	19.2543	25.3626	20.6376	11.567	5.87269	3.94131	3.24714	4.18486	7.84799	23.5963	36.5086	37.5279	38.2851	39.943	44.1334	45.4235	48.7546	50.3525	50.1606	51.6268	52.8175	51.996	48.534	42.078	32.7898	24.7689	17.4544	12.5573	9.21738	6.40471	4.18293	2.44786	0	0	0	0	0	0	0	0	0	0	0	0
393.07	8.73923	6.92691	19.1183	5.71151	1.13687	19.0761	26.4922	20.742	11.6729	5.4474	4.14531	3.52825	4.4242	8.0301	24.221	36.7128	37.4981	38.8368	41.2754	44.7065	45.8789	49.8277	51.6672	50.4186	51.9066	53.226	52.7018	49.7555	42.9888	33.7983	25.6445	18.155	13.4824	9.83449	7.03269	4.65907	2.87977	0	0	0	0	0	0	0	0	0	0	0	0
394	8.68737	4.69119	15.4924	10.9607	5.1612	18.6684	25.8411	20.8974	11.8966	5.17559	4.17446	3.65252	4.50559	7.88491	24.3915	37.4092	37.8796	39.7275	42.5423	45.0629	46.5397	50.3964	52.116	51.2712	53.1725	53.5789	53.5562	50.9313	43.7455	34.6113	26.4626	18.8372	14.1591	10.6448	7.33149	5.51031	3.54151	1.15897	0	0	0	0	0	0	0	0	0	0	0
395.07	8.52912	3.20089	13.3468	6.77533	7.97814	19.7723	24.8846	20.6077	11.6513	5.40503	4.1192	3.50427	4.50479	7.80542	25.0048	37.8756	38.3732	39.6104	42.5963	45.8271	46.2612	50.6918	51.6466	51.6925	54.3209	54.8693	53.9454	51.7132	44.9709	35.5771	27.5455	19.6277	15.114	11.3555	8.15591	6.18151	4.27311	1.91015	0	0	0	0	0	0	0	0	0	0	0
396	1.3233	9.22913	4.33452	0	4.63077	18.3318	26.1293	21.0099	10.7878	5.70109	3.85216	3.62958	4.6729	7.89857	25.338	37.9308	39.0641	40.5135	42.2827	46.2214	47.7598	50.7151	52.245	52.4971	54.4935	56.5592	54.7291	52.3575	46.1982	36.7375	28.7798	20.7204	15.7391	12.1064	9.29788	6.94062	4.64833	2.67933	0	0	0	0	0	0	0	0	0	0	0
397.07	5.5922	4.43285	8.42385	2.51009	1.71503	18.7638	26.7273	20.8992	10.738	6.11887	3.93136	3.5203	4.59525	7.809	25.1462	37.9837	39.4287	40.8011	42.947	47.2377	49.0953	52.0148	52.9917	52.6003	54.6832	57.6437	55.9024	52.9825	47.0338	38.3627	29.8755	21.8005	16.6491	12.7479	10.3411	7.4227	5.16689	3.22711	0	0	0	0	0	0	0	0	0	0	0
398	6.57462	6.08577	7.02187	7.97033	3.24777	19.7602	26.3403	21.3529	10.9574	6.03579	4.54994	3.65461	4.24798	7.68666	24.807	37.843	39.5405	41.1423	43.5978	47.8553	50.36	53.1446	53.5453	53.2157	55.1954	57.4764	56.3683	53.3389	47.8093	39.4138	30.3554	22.8017	17.6017	13.7098	10.8554	7.99218	5.87387	3.80771	0	0	0	0	0	0	0	0	0	0	0
399.07	3.53787	4.52021	14.9594	7.78267	5.26565	20.5543	26.8881	21.6658	11.3839	5.94183	4.57565	3.60115	4.12036	7.79403	24.693	37.7915	39.5415	41.3561	44.3535	48.4379	50.0773	54.1114	53.9597	53.5489	55.9181	57.8148	56.9341	54.1579	48.3923	40.5153	30.6936	24.0294	18.8099	14.5243	11.5698	8.86938	6.43968	4.46482	1.60803	0	0	0	0	0	0	0	0	0	0
400	6.42941	4.24086	5.79922	1.093	3.62804	19.7822	28.1403	22.9442	11.2766	5.98468	4.13717	3.85216	4.46624	8.0167	25.3737	37.9039	39.6098	41.8834	45.0294	48.7436	50.4364	54.2075	54.6708	53.7818	56.4673	58.4371	57.9702	54.786	49.5038	41.8334	32.0052	24.8244	19.4189	15.3658	12.3655	9.53832	6.99062	5.08859	2.44046	0	0	0	0	0	0	0	0	0	0
401.07	14.8486	0	3.0746	0	1.27287	20.9468	28.3021	22.7994	11.7413	6.5341	3.6522	3.4071	4.86891	8.10835	25.7594	38.0282	39.9678	41.8604	45.2102	49.5397	50.2572	54.6849	55.3948	54.3755	57.4072	59.1584	58.8497	55.8171	50.1947	42.8783	33.4142	25.648	20.0825	16.2491	13.427	10.4338	7.69604	5.55466	2.8474	0	0	0	0	0	0	0	0	0	0
402	10.3784	0	4.54477	0	1.2329	23.0643	27.6266	22.5141	11.7373	6.64948	3.88253	3.61397	4.78841	8.02185	26.1117	38.7359	39.8328	42.4158	44.9069	49.946	51.3266	54.3424	55.74	54.8589	57.8596	59.2916	59.309	56.6603	50.9418	42.9923	34.5961	26.4336	21.2578	17.0831	14.1406	11.0743	8.54675	5.95647	3.23699	0	0	0	0	0	0	0	0	0	0
403.07	4.50152	4.03978	0	0	4.05629	23.148	27.492	22.8399	11.7576	6.28386	3.98089	3.2097	4.74332	7.87223	25.6586	38.7589	39.4961	42.3738	45.0477	49.9831	51.2773	54.8431	55.8688	54.9225	57.9616	59.9826	59.9787	57.768	51.3233	43.5961	35.6537	26.9917	22.2751	17.9114	14.635	11.9479	9.0915	6.62266	3.87387	0	0	0	0	0	0	0	0	0	0
404	3.39801	6.4251	0	0	3.5166	21.1764	27.097	23.0862	11.6126	6.37493	4.33269	3.46087	4.55664	7.8466	25.7309	38.8354	39.8539	42.5448	45.7552	50.1323	51.9788	54.2714	56.7741	54.8637	57.2624	60.4012	60.7761	58.0422	52.5924	44.4881	36.3694	27.8871	22.8591	18.6603	15.4659	12.5612	9.74791	7.24423	4.2412	1.14989	0	0	0	0	0	0	0	0	0
405.07	1.27609	0	2.32567	6.27773	2.24112	20.7633	27.4764	22.9642	11.3063	6.5699	4.27664	3.62639	4.35997	8.03201	25.5156	38.4371	40.4664	42.7943	46.2628	50.4784	52.0904	54.7418	57.1586	55.7998	57.6306	60.6399	60.3943	58.2938	53.0394	45.2973	36.8153	28.6773	23.4578	19.6962	16.5906	13.5592	10.5206	7.62258	4.65892	1.70369	0	0	0	0	0	0	0	0	0
406	0	0	4.35705	4.21235	2.57054	21.0238	27.9691	23.1208	11.4892	7.08047	4.14293	3.79436	4.17949	8.19838	25.6627	38.8303	40.7848	42.9062	46.2947	50.7263	52.6139	55.2298	57.2874	56.3388	58.363	60.6908	60.7065	58.5805	53.5431	46.0396	37.5378	29.677	24.4976	20.7152	17.4292	14.3342	11.1971	8.01933	4.93961	2.10573	0	0	0	0	0	0	0	0	0
407.07	0	4.47521	0	5.45053	7.27193	22.8125	28.1465	23.0883	12.3582	7.18063	4.13086	3.48605	4.32926	8.00385	25.5353	38.6223	40.6015	42.9284	46.1488	51.0973	52.5104	55.7342	57.3013	56.6462	59.1188	60.9037	61.6376	58.7654	53.5709	47.0551	38.2985	30.3383	25.8103	21.7577	17.8758	15.0297	12.0293	8.73989	5.4893	2.52148	0	0	0	0	0	0	0	0	0
408	0	7.54889	3.54014	9.76505	9.21423	21.6418	27.7995	22.4913	12.7499	7.14664	4.24038	3.88839	4.50201	8.1852	25.861	38.4624	40.5677	43.2455	46.6806	51.5921	52.8908	55.8598	57.9543	56.3202	58.7691	60.909	62.4424	59.0669	54.0628	47.823	39.3663	31.4425	26.565	22.6039	18.905	15.6959	12.7246	9.6261	6.02726	3.01595	0	0	0	0	0	0	0	0	0
409.07	6.72286	0	13.851	11.9173	9.34789	21.3771	27.4062	22.9234	12.9074	7.04224	3.96508	4.07363	4.56489	8.26113	25.7058	38.3752	40.2484	43.7015	47.2578	51.7	52.8704	56.4391	58.0164	56.217	59.0122	60.8766	62.3017	59.6395	54.3958	48.1094	40.2346	32.5283	26.9714	23.2859	20.1652	16.3892	13.3854	10.1267	6.43379	3.56241	0	0	0	0	0	0	0	0	0
410	0.275536	0	14.2204	6.73178	7.73517	21.4827	27.925	23.8361	12.3907	7.39838	4.02591	4.08812	4.48491	8.37797	25.864	39.1874	40.5675	43.352	46.9789	51.6334	52.643	56.7713	58.0251	56.5314	59.7983	61.6715	62.0054	60.4994	55.7871	48.2091	41.4592	33.6274	27.5708	23.9274	20.9776	17.4271	14.0916	10.6923	7.0651	3.94134	0	0	0	0	0	0	0	0	0
411.07	0	0	9.48054	3.38555	6.91254	22.2587	28.3959	22.8524	12.3937	7.07797	4.22435	3.34829	4.34833	8.07516	25.6488	39.2267	41.3171	44.0105	46.7782	51.644	52.6575	56.2573	58.2138	56.9466	60.0258	62.4052	62.7765	60.7841	56.1747	49.057	41.8007	34.6498	28.731	24.7077	21.5084	18.105	15.0254	11.3321	7.64287	4.32504	0.159476	0	0	0	0	0	0	0	0
412	0	0	0.884748	7.4075	3.63622	21.3517	29.2017	21.6905	12.2317	6.79791	4.57123	3.4493	4.43497	8.40141	25.7254	38.9668	41.2045	44.5462	47.4572	51.7864	52.7341	56.6957	57.1836	56.8482	59.7327	61.9484	62.6749	60.9168	57.2451	49.9303	42.8904	35.1303	29.4459	25.4027	22.263	18.9768	15.9286	11.9366	8.28485	4.81647	0.71662	0	0	0	0	0	0	0	0
413.07	9.20681	0	4.05853	1.94026	1.94592	20.8854	29.1472	23.1308	12.7392	6.61116	4.58368	3.97122	4.63364	8.36598	26.1287	38.6219	40.7554	44.2426	47.573	52.061	53.182	56.4316	56.9098	56.6833	59.3237	62.1434	62.5801	61.0084	57.2534	51.2545	43.162	35.7896	30.0757	26.2065	23.2067	19.7575	16.6408	12.4229	8.76847	5.12877	1.16357	0	0	0	0	0	0	0	0
414	10.973	0	0.319022	0	0.770844	22.2594	28.8226	24.5059	12.1373	6.89596	4.45264	4.45686	4.50386	8.2126	26.3935	39.2964	40.813	43.2441	47.1564	52.222	52.7046	56.0538	57.0084	56.5991	59.4375	62.0363	62.5451	61.9074	57.9055	51.1562	44.2365	36.7616	31.3215	26.7853	23.6955	20.8079	17.1066	13.1289	9.40659	5.61942	1.47568	0	0	0	0	0	0	0	0
415.07	3.87713	0	0	0	5.292	21.2696	27.7946	23.9836	12.3019	6.30776	4.3381	3.88387	4.57812	8.0577	26.3115	39.4848	41.1204	43.3841	47.0722	52.2564	52.5828	55.3872	57.0771	56.6603	59.1874	62.069	63.1886	61.7723	57.1999	51.2989	44.9304	38.0976	32.0543	27.3498	24.7494	21.3566	17.2662	13.9893	9.92146	6.00287	2.00694	0.875044	0	0	0	0	0	0	0
416	0	0	0	3.20652	1.87046	20.8269	27.4709	22.8596	12.5893	6.34076	4.21265	3.42461	4.87831	8.53541	26.1946	39.8873	41.0808	43.4288	47.3826	51.7882	52.3277	55.3779	56.8557	56.6796	59.5674	61.1039	63.1434	61.5937	57.3253	51.1691	45.6136	38.8632	32.7315	28.2884	25.9121	21.8625	17.989	14.5068	10.2825	6.66873	2.42902	1.35268	0	0	0	0	0	0	0
417.07	0	7.41312	0	6.57391	4.76364	22.5795	27.5876	23.1656	12.2298	6.59791	4.47753	3.79857	4.96185	8.3046	26.3609	39.9101	41.1712	43.9809	46.8209	51.8344	52.5834	55.2988	57.4927	56.1655	59.9382	61.6596	62.5698	61.2883	56.8086	52.06	45.9556	39.3182	33.713	29.3107	26.4072	22.5499	18.9106	15.3819	10.7449	7.1184	2.85079	1.80453	0	0	0	0	0	0	0
418	6.64537	5.64381	0	11.1028	0	24.183	28.026	22.5693	11.9107	6.84591	4.54437	4.32412	4.71914	8.13635	26.2862	39.656	41.3719	44.0686	46.3146	52.0718	52.8615	55.5968	56.9862	55.7083	60.0157	61.8728	62.3542	61.7284	57.5103	52.6145	46.7869	40.3221	35.1518	30.3533	26.5092	23.4291	19.619	16.0288	11.3654	7.67434	3.30501	1.96398	0	0	0	0	0	0	0
419.07	6.77746	0	0	12.7949	6.02296	23.5628	27.0627	21.8456	12.0416	6.62763	4.80525	4.28213	4.35836	8.14125	25.8995	39.5426	40.9316	44.4533	46.8411	52.2304	53.0089	55.3479	56.2922	55.6576	58.9699	62.3308	62.6706	62.54	58.004	53.0658	46.8067	41.2355	35.6297	30.8104	27.3925	24.0681	20.3126	16.6626	12.0493	8.14808	3.8364	2.19387	0.396493	0	0	0	0	0	0
420	5.40385	0	0	2.72981	4.31169	20.8168	26.3822	20.6125	12.6485	6.62417	4.37412	3.96983	4.23646	8.14358	25.7853	39.6032	40.6354	44.1528	46.6358	51.4778	52.7172	55.346	57.0675	55.8449	58.1465	61.5021	63.158	63.1895	59.1423	53.2856	47.4254	41.9429	35.8597	31.6662	28.5565	24.5625	21.0555	16.9793	12.6991	8.86803	4.38079	2.48831	1.03794	0	0	0	0	0	0
421.06	8.66516	0	0	2.15575	6.93702	20.7459	26.5767	21.4847	11.7858	6.86625	4.30503	3.54091	4.47125	7.79097	25.6815	39.9517	40.7085	44.23	46.3807	50.9778	52.392	54.7731	57.5799	55.2732	58.8026	61.4092	62.5289	63.0522	59.3065	53.6856	47.7738	42.4142	36.4159	32.4515	29.2692	25.5668	21.5659	17.7897	13.1819	9.14459	4.87935	2.98468	1.14605	0	0	0	0	0	0
421.96	6.89444	0	0	0.630604	2.51031	19.8642	27.6825	21.9307	11.8313	6.59733	4.12823	3.59683	4.69292	8.0994	25.7541	39.928	41.3025	44.4975	46.382	50.9849	51.8412	54.3257	56.3135	55.093	58.9757	61.188	62.0287	61.9782	60.0546	54.4728	48.4264	42.2614	37.3281	33.1528	29.9391	26.5285	22.6187	18.3337	13.697	9.46507	5.65264	3.32311	1.37593	0	0	0	0	0	0
423.03	7.03148	0	0	0.445101	2.86369	19.4065	27.6647	22.3786	12.3954	6.49687	4.19998	3.52803	4.23354	8.38509	26.0854	39.6278	41.3641	44.5314	47.019	51.0248	51.0652	53.6193	55.4858	54.7272	58.3045	61.6727	62.1143	61.8721	59.2876	55.0903	48.5846	42.7383	38.2243	33.9573	30.4975	27.0497	23.7309	19.1959	14.3136	10.1906	6.00786	3.63435	1.62218	0	0	0	0	0	0
423.93	16.757	1.10918	0	0	1.99078	19.7475	26.8336	21.0538	12.8751	6.78411	4.16465	3.68428	3.97644	8.32166	26.348	38.8023	41.5498	44.3935	46.4934	50.7467	50.3014	54.1771	55.6139	54.8955	56.8043	61.3607	62.1158	62.4929	59.289	54.6509	49.6082	43.0121	38.3048	34.823	31.4169	27.3872	24.2583	19.8967	15.2867	10.9493	6.37298	3.87199	1.96362	0	0	0	0	0	0
425	9.93602	0	0	0	1.31708	20.9612	26.7734	20.9479	12.189	7.17788	4.2015	3.76717	4.40333	7.93572	26.2061	39.0273	41.6638	44.4976	46.0865	50.217	50.5352	54.1028	55.2512	54.6123	57.2746	61.2749	61.7745	63.0593	59.0585	54.6557	49.4039	43.9968	38.9345	35.5992	31.7362	28.3898	24.571	20.8474	15.9754	11.2699	6.7331	4.05428	2.23155	0.377579	0	0	0	0	0
426.06	0	0	0	0	3.20668	21.3957	27.0553	21.0819	12.2513	6.72067	4.22342	3.83483	4.60673	7.8669	26.0381	39.4077	41.6676	44.545	46.1892	49.8009	49.8273	53.7172	54.4482	54.3629	56.7556	60.1494	61.6469	62.6994	60.1111	54.8662	49.6938	44.432	39.5279	35.7759	32.4127	29.3648	25.242	21.6122	16.7501	11.8559	7.33918	4.35306	2.50393	0.8143	0	0	0	0	0
426.96	0	0	0.154605	0	6.22464	20.3795	26.8601	21.5917	12.2011	6.65722	4.1641	3.9043	4.23882	7.71206	26.0977	39.9713	41.2291	44.3258	46.5919	49.6672	49.6828	52.7883	54.4901	53.9618	56.0095	59.3813	61.0475	62.1122	60.3802	55.9075	49.9669	45.3086	40.51	36.2521	33.2259	29.614	26.0713	22.2319	17.2068	12.76	8.22162	4.86369	2.79131	0.963386	0	0	0	0	0
428.03	2.04789	0	3.47177	0	6.15171	20.5027	25.9933	21.4419	11.1895	6.68823	3.96379	3.45827	4.16821	7.83699	26.1621	39.931	41.1687	44.0883	46.4692	49.7557	49.0394	52.3597	54.441	53.5363	55.4341	59.6616	61.2283	61.3708	59.8962	55.8688	50.4515	45.2297	41.2788	36.9758	33.9742	29.8519	26.5531	22.6853	17.9426	13.4457	9.01868	5.71658	3.24578	1.39021	0	0	0	0	0
428.93	0	0	0	0	1.83249	19.4735	26.0527	20.8892	10.4686	6.86587	4.20721	3.37951	4.27032	7.75394	26.1153	39.9581	41.4021	44.3608	45.9078	49.1754	48.6579	51.6902	53.7608	52.5115	55.9804	59.4996	61.7151	60.5599	58.974	55.6612	50.2181	45.1058	41.7565	37.4261	34.3952	30.0991	27.2645	23.4089	18.3653	14.175	10.0111	6.68077	4.04402	2.236	0.351472	0	0	0	0
430	0	0	1.79168	0	0	20.2263	26.0115	20.8223	11.4727	6.86657	4.60521	3.74051	4.39102	7.64609	25.8826	39.9722	41.5396	44.2184	45.4537	48.7367	48.4192	51.3261	52.7615	52.125	55.7749	58.8621	61.176	59.7322	58.6542	55.2753	50.6459	45.2765	41.7656	38.0665	35.0778	30.8106	27.6321	24.0977	19.1683	15.0088	10.7567	7.80204	4.82572	3.08851	1.6318	0	0	0	0
431.07	9.94701	1.62616	5.37721	0	0	20.6964	25.2334	20.8783	12.4192	6.70682	4.70874	3.90682	4.35422	8.00463	26.3281	40.2488	41.3512	43.7634	45.5566	48.1455	48.4106	50.7473	52.3424	51.8057	55.5211	58.1476	59.8538	60.2597	58.6843	55.4203	50.9876	45.8617	41.7254	38.6013	36.2715	31.4138	28.2956	24.7903	19.949	15.6686	11.6941	8.68283	5.61756	3.79443	2.37631	0	0	0	0
432	8.49509	9.55795	0	0	3.75227	20.4844	24.3152	21.1304	12.104	6.3527	4.26371	3.83289	4.47082	7.9327	26.816	39.7641	41.7412	43.3504	45.9002	48.1476	47.5494	50.4949	51.8971	51.3414	55.023	58.3766	59.722	60.9789	58.2639	55.2852	50.9906	46.5561	42.3533	39.4678	36.5069	32.222	28.9607	25.4444	20.7132	16.1808	12.4095	9.42567	6.29397	4.384	2.93862	0	0	0	0
433.07	0	8.95701	0	0	6.34642	21.1858	23.6391	20.468	11.618	6.18185	4.5021	3.63076	4.20476	7.98555	27.1584	38.6415	41.5256	43.5376	46.1431	48.0066	47.2151	50.4158	51.8036	50.4723	54.6931	57.6747	59.7137	61.4477	58.355	54.9524	50.844	47.006	42.8385	39.6747	36.8002	33.2721	29.8332	26.0018	21.3995	16.8558	13.3993	10.1131	7.16302	4.94549	3.40405	0	0	0	0
434	0	5.631	0.308682	0	0.922561	21.7957	24.7186	20.389	11.4313	6.54538	4.70704	3.74597	4.24532	7.94591	26.6984	38.7024	41.7617	43.8505	45.9358	47.8167	47.4706	50.2273	51.1823	50.6959	54.0219	57.5157	58.7357	60.5969	58.3887	54.9062	51.0256	47.1659	43.3167	40.1695	37.2504	34.2553	30.1355	26.5385	21.9682	17.5218	14.0332	10.7232	7.90399	5.57063	3.98125	1.66876	0	0	0
435.07	15.1648	0	0	0	0	20.7048	25.1303	20.5728	11.4692	6.42448	4.79495	3.43021	4.20841	8.36397	26.5833	39.9546	41.8281	44.0462	45.484	47.236	47.0488	49.4467	50.836	50.3252	53.9539	56.7018	57.611	59.8772	58.1966	54.7581	51.4756	47.7456	43.466	40.4801	38.3133	35.0262	30.7025	27.5045	22.9086	18.2554	14.8699	11.4018	8.5361	6.21806	4.31044	2.20199	0	0	0
436	14.6585	0	2.53736	0	0	17.2514	25.0895	20.1205	11.3841	6.033	4.65401	3.37807	4.18644	8.30449	26.9771	40.5694	42.3986	44.4482	45.4541	47.0206	45.8556	48.4022	50.0977	49.3502	52.8333	55.3882	57.0534	58.781	57.8561	54.9668	51.3936	47.8637	43.7255	41.0644	38.851	35.3277	31.7582	28.4018	23.7533	19.093	15.3765	12.1413	9.35819	6.82558	4.67521	2.66882	0	0	0
437.07	17.9763	3.47728	13.4988	0	0	16.9642	23.763	19.237	11.4684	5.85266	4.51139	3.11817	3.97332	7.93758	27.037	40.1972	42.0278	44.6313	45.4707	46.8986	45.3208	48.2262	49.8757	48.9635	51.8198	54.2827	57.233	58.9076	57.9204	55.5095	51.042	48.0629	44.4157	41.3735	39.0919	35.8985	32.3483	29.2985	24.6174	19.7137	16.0024	12.7817	10.1005	7.37601	5.10849	3.03463	0	0	0
438	10.3998	9.80164	6.64377	0	0	17.8041	23.713	18.8936	11.4811	5.95343	4.36114	3.0966	4.36955	7.65188	27.306	40.126	42.8817	44.3744	45.4852	46.307	45.2388	47.7979	49.2571	49.2424	51.2724	54.8875	57.0385	58.843	57.5542	55.1378	51.4271	47.9742	44.7601	41.8402	39.5438	36.4866	32.5706	30.0804	25.424	20.3023	16.6827	13.3957	10.6517	7.83833	5.64411	3.46286	0	0	0
439.07	4.53157	11.8567	0	0	0	19.2069	23.5455	18.8816	10.4385	6.14257	4.0965	3.2342	4.40196	7.81185	27.5479	40.4556	43.2143	44.2466	45.362	46.2138	45.1369	47.0209	48.9636	49.0984	51.6544	55.3117	56.8275	58.1373	57.7555	54.7785	51.7885	47.6045	45.0595	42.3286	40.3661	37.2398	32.9643	30.7522	25.897	21.0916	17.7415	14.1923	11.1662	8.4525	6.03294	3.84204	1.22931	0	0
440	0	7.90982	3.74802	0	0	18.3599	23.853	17.2405	10.9014	6.38235	4.47534	3.66701	4.21209	8.02751	28.2175	41.7916	43.5456	44.8538	45.2332	46.1419	45.1669	46.0535	48.3302	48.3489	50.5309	54.6402	55.9543	56.7081	57.387	53.8685	52.174	47.6761	45.5714	42.8341	41.2375	38.1169	34.3896	31.2553	26.743	22.2644	18.7436	15.2113	11.7623	9.18897	6.48938	4.27331	2.04015	0	0
441.06	9.24291	8.97183	14.3811	0	0	16.4109	23.0178	17.0679	11.2234	6.74138	4.42365	3.8261	3.82566	8.19476	27.9083	42.1961	43.2802	45.3159	45.5966	46.1233	44.2276	45.907	47.912	47.4164	50.4122	53.9155	55.6786	56.72	57.2359	53.6343	51.8535	48.4904	45.6254	42.8707	41.8229	38.7617	35.2709	32.0795	27.3446	23.2453	19.6801	15.9587	12.4047	9.67601	6.95551	4.58351	2.32006	0	0
441.96	7.28032	11.805	6.57384	2.52297	0	15.973	22.3203	18.2722	11.4911	6.68202	4.38457	4.00581	4.29378	8.33734	27.9273	42.4333	44.1806	45.4171	45.922	46.4533	43.9976	45.9192	47.4403	46.4312	49.9647	53.7734	54.8015	56.2535	56.4524	53.6893	51.6598	48.7222	45.9249	43.3984	41.8747	39.4766	35.8791	32.6225	28.1875	24.3596	20.3206	16.5483	12.8732	9.92799	7.32813	4.86011	2.72075	0	0
443.03	9.21743	12.7686	0	1.28311	0	13.8944	22.3676	19.7641	10.7749	6.5805	4.06453	3.36875	4.53338	8.69775	28.2085	41.9215	44.1324	45.5921	46.5205	46.0518	43.7505	45.7046	47.0234	46.3573	50.2411	53.5176	54.9933	55.7744	56.3911	54.455	51.4587	48.5284	46.4442	44.2887	42.1928	40.2101	36.0755	33.0722	29.085	25.1898	20.7706	16.9776	13.4146	10.3328	7.78778	5.17241	2.9798	0	0
443.93	1.66913	14.0188	0.671803	3.39079	0	10.5052	22.6496	19.5361	11.3056	6.16759	4.14995	2.97028	4.83729	8.57584	28.745	42.4693	43.9559	46.3754	46.5684	45.4894	44.4877	45.0961	46.4646	46.1719	49.2283	52.5063	54.7408	55.2301	55.7927	54.7144	52.3126	48.8003	47.0502	44.6152	42.8796	40.4705	36.8812	33.5619	30.1048	25.7075	21.6668	17.7943	14.1607	11.2601	8.33984	5.6817	3.39379	1.02662	0
445	7.52912	9.50681	4.49167	8.59828	0	4.0993	22.04	19.7848	10.6328	6.37056	4.04984	3.36982	4.37365	8.45474	28.6097	42.9407	44.1179	46.7499	46.3295	45.2144	43.8382	44.5207	45.7388	45.2541	49.2111	52.284	54.7069	55.9319	55.3483	54.166	52.9811	49.3367	47.1322	44.3628	44.2079	41.0777	37.8693	34.9983	30.8869	26.4327	22.2978	18.8475	15.0872	11.8979	8.92277	6.16318	3.70008	1.56576	0
446.06	1.68885	3.52256	3.79226	5.00612	0	0	21.4944	18.45	10.2806	6.33009	4.12759	3.95225	4.36991	8.37048	28.8903	43.5802	45.295	47.2981	46.4472	45.9447	43.5355	44.3278	45.3965	44.9113	48.3299	52.4985	54.7769	55.422	55.2977	54.1902	53.0874	49.5518	47.1116	44.928	44.8158	41.5083	39.3286	35.9511	31.5586	27.2113	23.228	19.8049	15.7314	12.6441	9.37421	6.45389	3.97626	2.00477	0
446.96	1.3053	0	6.19176	8.00617	0	0	22.6959	18.7698	9.80484	6.76028	4.26629	3.85825	4.15942	8.43113	29.5247	44.1494	45.6861	47.4209	46.7288	45.9342	42.5289	44.1602	44.7918	44.7117	48.1809	52.2215	54.2627	54.9617	55.1263	54.5709	52.2226	49.6409	47.2981	45.9528	45.0745	42.4411	40.375	36.9043	32.7306	28.0332	23.9051	20.3389	16.2793	13.2557	9.85109	6.88742	4.14837	2.32415	0
448.03	0.979706	4.2725	0.873156	9.70086	0	0	22.7301	18.8245	10.3345	6.06328	4.46458	3.52226	4.27385	8.73742	30.2865	44.3402	46.1665	47.8928	46.9843	45.7427	42.3685	43.9591	44.3509	44.4786	47.7152	51.4336	53.3952	54.5432	54.5845	54.9984	52.1478	49.911	47.7775	46.5755	45.3331	43.085	40.8252	37.1101	33.4032	28.8342	24.9031	20.7936	17.0197	13.6886	10.3775	7.25699	4.53664	2.62869	0
448.93	13.5519	11.6079	7.19974	14.1269	0	0	21.4546	19.5654	10.6522	6.01445	4.67471	3.66153	4.1226	8.72179	30.4819	44.4667	46.3656	48.3104	46.6696	45.7497	42.2978	43.2411	44.1009	43.7041	47.7274	50.5908	52.7569	55.3362	54.5225	53.9347	52.2472	50.2842	48.5667	46.7786	46.209	44.332	41.3333	38.1544	34.1116	29.9894	25.5657	21.6724	17.7678	14.1644	10.9304	7.62664	4.81314	2.89699	0.855606
450	14.0848	21.7472	11.2541	4.25197	0	0	19.8413	17.6919	11.3178	5.81277	4.47119	3.75077	4.11384	8.76174	29.9345	44.9938	47.0387	49.2731	47.3103	45.6968	42.5043	42.7867	44.1814	43.8218	47.3621	50.3624	52.9019	55.0073	54.7793	53.64	52.5912	50.8329	49.1116	46.8976	47.0125	44.532	42.1783	38.7809	35.0294	30.8709	26.7365	22.6843	18.5945	14.8875	11.4676	7.94365	5.18868	3.24589	1.54548
451.06	10.2214	17.5452	14.0718	0	0	0	19.1846	17.7731	10.7413	6.42128	4.13938	3.45701	3.92344	8.97884	30.0858	45.9794	47.717	49.6628	47.8354	45.7184	42.1094	42.3759	43.8119	43.8138	46.8684	49.8907	52.3403	54.9227	54.87	53.9949	52.4885	50.8488	49.264	47.1429	47.1606	45.0753	42.8287	40.0754	35.8616	31.3233	27.7167	23.4981	19.1249	15.5575	12.0202	8.43289	5.55198	3.61705	2.0084
451.96	5.89712	9.19442	4.47601	0	0	0	17.7924	17.0015	10.4761	6.27491	3.89274	3.61051	4.20102	9.30994	30.2957	46.5863	48.8342	49.4957	47.9144	45.9441	41.9162	42.2095	43.0617	43.817	46.1539	49.6739	52.562	54.101	54.8695	54.4676	52.8024	51.2434	49.0237	47.656	47.7015	46.0366	43.2185	41.0531	36.3799	31.6455	28.5026	24.063	19.799	15.7642	12.5385	8.96651	6.04901	4.03658	2.1303
453.03	10.8219	0	0	4.98274	0	0	13.0512	16.7639	10.6095	6.55912	3.96376	3.57661	4.597	9.32802	31.0523	46.5911	49.3678	49.4222	47.5476	46.3181	42.1294	41.5611	42.6957	43.0032	45.7511	48.9184	52.0408	54.1004	54.7968	53.7944	53.3047	51.9216	49.3011	48.3348	47.8568	47.0824	44.3835	42.2097	37.4864	32.4999	29.0279	24.6165	20.3769	16.2382	12.979	9.39811	6.38497	4.27609	2.5313
453.93	19.7746	2.45858	0	0	0	0	3.30502	16.42	10.68	6.26029	4.08516	4.01353	4.82428	9.05581	31.092	45.993	49.3332	49.925	48.588	46.3242	42.2184	41.0976	42.2713	42.6334	46.1367	48.6972	51.6852	53.4558	53.8186	53.3546	52.8569	51.9817	50.2979	48.6563	48.3725	47.1864	45.209	42.7872	38.3585	33.4822	29.6567	25.2235	21.3119	16.9866	13.3442	9.72416	6.83938	4.46961	2.9818
455	5.12595	4.00324	0	0	0.538907	0	0	17.4356	10.1242	6.05557	4.4957	3.91332	4.29747	8.94784	31.7856	46.5048	49.4419	50.6766	49.4822	45.9392	41.8952	40.5464	42.3191	42.4809	45.9359	48.2916	50.5909	53.1509	53.0243	53.0122	52.4843	51.732	50.8009	48.9358	48.7364	47.775	45.9776	43.4968	39.3165	34.4328	30.9938	26.2733	21.7845	17.9773	13.9172	10.1053	7.01765	4.706	3.42422
456.06	0	2.46177	2.8749	0	0.125299	0	0	16.8019	10.1773	5.75669	4.46942	3.75972	4.00509	8.82627	32.3085	47.0756	50.1224	51.4271	49.86	45.9559	41.9144	40.2406	42.0333	42.1415	45.5959	48.0596	50.7866	52.8147	53.4559	53.2548	52.5023	51.2771	50.6174	49.4641	49.3613	48.4564	46.129	44.2067	40.0354	35.0861	31.9752	27.1113	22.4318	18.5707	14.4859	10.6872	7.32248	5.24571	3.65645
456.96	0	4.61782	3.80108	1.71912	1.95698	0	0	16.3761	9.97358	6.02615	4.04668	3.14365	4.20631	8.93975	32.3546	48.2866	51.1927	51.6477	49.2669	46.4083	42.0136	40.238	42.0664	41.3852	44.536	47.8404	50.3725	52.5682	53.492	53.4543	52.9887	52.0523	50.5165	50.1928	49.5034	49.3529	46.7146	45.018	40.7872	35.9088	32.4707	27.8646	23.1639	19.1245	15.0382	11.0952	7.72325	5.61888	3.82053
458.03	2.44984	4.3465	5.66301	0	7.56056	0	0	15.271	9.54215	6.26738	3.7959	3.26929	4.52507	9.24317	32.1968	48.2352	51.7533	52.1405	49.3201	46.6122	41.4873	39.818	41.1311	41.1726	43.7946	47.7363	50.4045	52.229	53.5439	52.9402	52.9325	52.1417	51.1712	50.0749	50.1927	49.5264	46.9346	45.2077	41.3641	36.5406	32.8056	28.5023	23.7746	19.5981	15.4421	11.3644	8.30438	5.82631	3.98465
458.93	6.14587	0.390998	3.75749	0	4.93884	0	0	14.3389	9.25596	6.3179	3.88297	3.62441	4.53268	9.13169	32.426	48.47	50.7652	52.5281	49.8933	46.6663	41.0443	39.7569	40.7106	40.7889	43.2651	47.697	49.9988	51.4531	53.4015	53.0451	52.6796	51.8584	51.4938	50.1386	50.8346	49.6874	47.5992	45.445	41.9166	37.4485	33.6714	29.1724	24.1006	20.1252	15.7941	11.679	8.60072	5.97202	4.35076
460	3.63876	0	9.40955	0	1.75442	0	0	12.5211	9.36868	6.3151	3.96593	3.68966	4.4824	8.93701	33.109	48.7097	50.6917	53.3806	50.3341	46.6588	41.3338	39.4138	40.2523	40.75	43.539	47.2439	49.0484	51.8159	53.055	53.0071	52.8977	51.1646	51.595	50.6955	51.6618	49.612	48.2839	45.9412	42.7575	38.025	34.3387	29.6342	24.571	20.3484	16.1011	12.0071	8.90668	6.43613	4.71898
461.06	0	1.90426	0	0	1.28136	0	0	10.7286	9.53573	6.04867	3.94295	3.44565	4.63512	9.45151	32.9636	49.5108	51.4033	53.5345	50.3765	46.453	41.1179	39.3866	40.2713	40.1236	43.9835	46.2726	48.8683	51.6226	52.1326	52.8342	52.7026	51.6159	51.2345	51.5176	51.8705	50.4011	49.2946	47.0132	43.1025	38.5996	35.0918	30.6742	25.2739	20.7697	16.6462	12.4418	9.18098	6.80252	4.86277
461.96	3.51043	9.28538	0	3.85331	5.83143	0	0	6.86026	9.56154	5.56133	3.81867	3.40999	4.4687	9.92125	33.0941	50.2169	52.5542	53.8424	50.3508	45.8213	40.3228	38.6959	39.4768	39.5339	43.644	46.007	48.4035	50.8775	51.5941	52.2075	52.4084	52.3378	51.7907	51.4721	51.8307	51.3993	49.8389	47.6302	44.0381	39.3321	35.8597	31.3595	25.8398	21.3326	17.2958	12.7413	9.37791	7.13746	5.03753
463.03	5.55487	7.31761	5.29165	7.47157	3.90814	5.94226	0	0.0453275	9.52851	5.4247	3.73719	3.40115	4.20427	9.68395	33.2469	50.172	52.3164	53.4514	50.6945	45.6618	39.8551	38.6175	39.174	38.9229	43.523	45.8052	48.6825	50.314	51.8638	52.5876	51.5805	52.3981	51.8221	51.2378	51.867	51.5639	50.4478	48.1406	44.6161	40.3107	36.5206	31.4461	26.4461	21.9967	17.8319	12.9776	9.58372	7.28279	5.38994
463.93	6.50045	2.1871	6.39541	0	5.512	12.4845	0	0	9.60039	5.75197	3.70723	3.52222	4.062	9.42911	33.7272	50.3473	52.8544	53.5688	50.9622	46.0115	39.6485	38.3905	38.9997	39.0092	42.8985	45.5553	47.6661	49.918	51.7145	52.7319	51.6637	52.2748	51.2791	50.8454	52.5362	51.4649	50.4121	48.7766	45.2132	40.6936	37.0009	31.6648	26.9171	22.4014	18.335	13.2601	10.0311	7.53587	5.86809
465	6.67491	0.221782	0	0	4.74894	15.6881	0	0	9.84073	5.99542	3.86483	3.25555	4.34078	9.24149	33.8647	50.0354	53.684	53.6927	50.6693	45.9214	39.5581	38.3352	38.7155	38.9314	42.5179	44.7993	47.2016	49.4918	50.8668	51.2314	51.4074	51.4763	50.7669	50.8404	52.4851	51.5654	50.7266	49.1432	45.5981	41.3448	37.4228	32.2162	27.3303	22.6327	18.7163	13.7683	10.3641	7.83842	6.02082
466.06	15.8706	0	7.19175	0	5.74992	15.9923	0	0	9.13644	5.6985	3.70155	2.96981	4.16415	9.39445	33.8233	50.6053	53.783	53.9747	50.4632	45.4939	39.6923	38.0578	38.0029	37.9082	41.918	44.1055	46.547	48.871	50.1421	50.7077	51.2889	51.605	51.1886	50.9406	52.2527	52.0277	51.109	48.9335	45.6876	41.8867	37.8176	32.886	27.8157	23.061	18.8933	14.1285	10.5185	8.13524	6.24322
466.96	17.3157	0	15.9656	2.78337	1.56854	16.2411	0	0	8.88266	5.62685	3.89999	3.28972	4.18225	9.3164	33.2383	50.5232	53.4239	53.3779	50.8608	45.4594	39.7426	37.5388	37.1825	36.937	41.3721	43.1213	47.0151	48.228	49.9471	50.1501	50.7022	51.2773	51.4414	50.6413	52.173	52.3268	51.7598	49.1381	45.7849	42.4032	38.1071	33.2022	28.2363	23.4995	18.97	14.2706	10.6052	8.19605	6.32845
468.03	16.4023	12.9671	14.0098	5.16868	0.960873	16.6751	0	0	9.4867	5.55987	4.08387	3.57087	4.28263	9.58715	33.1346	50.5841	53.2481	53.6519	51.0527	45.2952	39.0946	37.2139	37.1146	36.7477	40.7648	43.054	46.8315	47.7543	49.6553	49.9332	50.7408	50.678	51.0901	50.112	52.2859	52.2907	51.5215	49.7445	45.9413	42.3332	38.4479	33.6312	28.3689	23.9193	19.3654	14.3848	10.9811	8.30636	6.53637
468.93	6.66991	18.5833	3.35665	5.04802	0.65824	16.6154	0	0	9.69069	5.82399	4.06739	3.52569	4.76473	9.26329	33.1499	50.2323	53.5438	53.8783	50.7706	45.4451	38.6956	37.1183	36.7023	37.1696	40.0786	42.7125	45.7712	47.5834	49.1571	48.4678	50.2832	50.2128	50.0451	50.2596	52.6213	52.3176	51.2576	50.0058	46.5884	42.3247	38.7956	33.6002	28.7085	24.0678	19.6982	14.6862	11.3408	8.527	6.65335
470	7.26274	12.3826	1.17422	9.5289	6.62412	15.4926	6.6201	0	8.3275	5.56233	3.63401	3.01813	4.4039	9.38342	33.301	50.373	53.4988	54.1428	50.6049	45.323	38.3534	36.6582	36.269	37.2317	39.5626	41.9675	44.9183	47.525	48.9275	48.1597	50.3368	49.9025	49.9827	50.644	52.5432	52.0782	51.1547	49.9539	46.8462	42.936	39.4573	34.2734	29.0599	24.4263	20.0167	14.9971	11.5386	8.78722	6.93874
471.06	0	5.99243	2.8425	8.2229	8.46963	14.2918	11.0425	0	6.77325	5.42364	3.29393	3.40412	4.38873	9.3029	33.8819	50.3721	53.4544	53.6523	50.7189	45.2424	37.9079	35.6069	35.532	36.4985	39.0487	41.5719	44.8323	46.3765	48.1261	48.0002	49.9633	50.0851	50.3527	50.3656	52.5506	51.7137	51.2873	50.1105	46.9964	43.1512	39.4946	34.7801	29.6685	24.6709	20.2166	15.2609	11.6253	8.92632	7.04384
471.96	1.09357	4.66046	10.4125	4.64296	5.40201	13.258	13.4226	0	4.0373	5.1676	3.37739	3.25125	4.36973	9.48093	33.5768	50.0872	52.8833	54.1238	50.6463	44.7215	37.7365	34.8514	35.247	35.6194	39.1704	41.734	44.5574	46.0442	47.1919	48.526	49.3017	49.2307	50.5101	49.6301	52.6458	51.5699	51.4558	50.5531	47.3687	43.4551	39.8149	34.9319	30.1003	24.9852	20.5213	15.5397	11.7985	9.06543	7.14304
473.03	2.54742	4.39436	10.4145	6.52493	2.79244	13.3051	15.0446	0	0	5.15641	3.61998	3.16477	4.35412	9.35104	33.2615	50.1516	52.852	54.2167	50.3296	44.5804	37.3755	34.6574	34.9944	34.8651	38.6811	41.2202	43.5803	45.1936	46.576	48.267	48.9627	49.0513	50.2314	49.462	52.6506	51.794	51.6793	50.4043	47.7779	43.2388	39.8516	34.6149	30.208	25.0684	20.6062	15.8342	11.9008	9.2481	7.26813
473.93	4.90913	9.29126	5.96164	10.562	2.50433	14.3705	16.5313	0	0	5.08564	3.67641	2.90648	4.25722	9.30089	32.7297	50.1557	52.8134	53.9562	50.0847	44.1232	36.7397	34.3822	34.6756	34.8923	37.3704	40.2863	43.0099	44.4777	46.8741	47.2989	48.8267	48.4642	49.9537	49.6044	51.6999	52.127	52.0027	50.2116	47.739	44.0282	39.8419	34.9515	29.7708	25.2164	20.9024	15.8178	11.9477	9.28722	7.5815
475	0	10.3671	4.379	5.8014	0.577973	14.5386	16.4374	0	0	4.75529	3.4244	3.29903	4.15691	8.95927	33.3539	50.0361	52.3715	53.3695	49.3988	43.9172	36.1813	33.5684	34.4708	34.4231	36.4308	39.5327	42.767	43.9558	46.5681	46.6119	47.9379	48.5722	49.2644	49.7623	51.3717	51.8876	51.8307	50.1579	47.6416	43.8887	39.6489	35.2786	29.7796	25.4207	20.7978	15.746	11.9157	9.4064	7.75296
476.06	0	13.0008	9.79852	2.34596	0	14.2182	15.9314	0	0	4.62824	2.97885	3.29219	4.20446	9.02869	32.9368	49.2729	52.0893	53.3683	49.2227	43.6313	36.1653	32.9965	33.8004	34.3468	35.8282	39.1483	42.4688	43.7439	45.6174	46.0613	47.003	48.3044	48.3035	49.6712	51.5986	52.2756	50.8761	50.1104	47.3353	44.0171	39.8667	35.5374	29.9482	25.2473	20.7485	15.7042	12.209	9.65182	7.81741
476.96	5.71105	10.4874	11.3882	3.0222	0	14.0633	15.6047	0	0	4.42928	2.95818	2.73592	3.99303	8.80737	32.821	49.4335	52.1786	53.3491	49.1053	43.8325	35.5249	32.882	33.5908	32.8626	35.6972	38.7514	41.7809	43.0547	44.2384	45.3678	46.9268	47.4116	48.0211	48.8511	51.4254	52.2828	50.4092	50.3312	47.2276	43.7784	40.2688	35.4816	30.076	25.2012	20.7158	16.0096	12.3319	9.84671	7.7528
478.03	16.0946	10.8358	13.8527	2.87457	0	15.4729	15.3123	0	0	4.73569	3.24864	2.41338	3.82588	9.09187	32.4096	49.7557	52.4002	52.6694	48.6119	43.1289	34.9509	32.98	32.9476	31.7602	35.1174	37.6706	40.5004	42.2815	43.5634	44.8505	46.5836	47.2115	47.825	47.7016	51.0062	52.017	50.8547	50.1666	47.1543	44.1299	40.3684	35.5867	29.9806	25.3688	21.0122	16.0953	12.5037	9.87693	7.93969
478.93	7.43661	13.3896	9.10098	0	0	14.2465	15.0193	0	0	4.6995	3.63768	2.86219	3.4962	8.99387	32.735	49.45	52.5363	52.5687	48.1638	42.6071	34.9725	32.3941	32.5931	31.2513	34.9011	37.4353	39.3911	41.9258	43.7439	44.6655	45.4975	46.6774	47.7116	47.5122	50.481	51.3767	51.0253	50.2677	47.5396	43.973	40.4387	35.6077	30.1241	25.5498	20.95	16.3283	12.4919	9.86226	8.21172
480	12.7753	13.3956	10.691	0	5.85415	11.9155	15.4396	0	0	3.12693	3.14465	3.06016	3.77648	9.05786	32.5737	48.9964	52.4694	52.1207	48.2873	41.3432	35.1348	31.9526	32.0778	31.3236	34.2394	37.1036	38.9588	40.962	43.0816	44.4855	45.1847	46.2271	46.8272	47.8439	50.238	51.2333	50.5102	49.7591	47.5249	43.3512	39.9936	35.7308	30.1621	25.3876	21.036	16.4619	12.6044	9.94848	8.31702
481.06	17.812	12.4313	3.19173	0	9.07302	10.5611	15.782	2.31214	0	0.879267	2.71243	2.44975	4.12514	8.74687	32.1587	49.1168	52.0252	52.0984	48.1852	41.1605	34.7888	30.9618	31.5514	31.0278	33.865	36.5724	38.9031	39.9277	42.4805	43.9149	44.7885	45.1528	46.4046	47.4435	49.4375	50.7182	49.7769	49.3561	47.0522	43.0733	40.0543	35.7128	30.0992	25.3908	21.1333	16.5115	12.6877	9.84225	8.30969
481.96	17.018	5.84518	7.65353	4.46474	2.6112	9.96212	16.0759	6.57402	0	0	2.66921	2.06694	4.01464	8.44496	31.8249	49.1656	51.1117	51.8479	47.4834	41.1837	34.0532	30.8185	30.5136	30.6432	33.1324	35.7411	38.4455	39.3968	41.4985	42.8145	44.16	45.155	46.0131	46.5183	48.6442	50.1923	49.4662	48.8371	46.4673	43.2596	40.3655	35.4447	29.9594	25.3487	21.2611	16.1348	12.7952	9.89994	8.25483
483.03	4.2855	4.54766	4.44708	6.39649	0	8.75419	15.2747	7.97039	0	0	2.58467	2.41316	3.69582	8.32544	31.3336	48.5864	51.4157	52.0436	46.6633	41.5354	33.8817	30.0679	30.3142	30.6189	32.4812	35.8548	37.9258	39.8927	41.4276	42.1934	43.4703	44.6627	45.8197	46.2164	48.2981	49.67	49.3626	48.6194	46.0937	42.978	40.0846	35.3005	30.1648	25.2578	21.3138	16.1432	12.9267	9.96352	8.16862
483.93	7.08589	11.5896	0	6.83881	1.70108	8.21368	15.0994	9.54261	0	0	2.53724	2.33913	3.57743	8.46451	30.7256	47.9622	50.7512	51.6232	46.7202	40.5174	33.8318	30.1544	29.8466	29.8389	32.3727	35.5317	37.1742	39.5236	40.7276	41.9793	42.8128	43.5968	45.3242	46.1364	48.369	48.9666	49.2989	48.1977	45.9033	42.6046	39.4196	35.0618	30.28	25.1834	21.2517	16.4692	12.9089	10.1675	8.16496
485	0	12.0123	0	5.75234	3.96631	9.64215	14.4164	10.5152	0	0	2.28873	2.12222	3.65779	8.33574	30.3783	47.452	49.435	50.6687	46.6632	39.6726	33.5789	29.4177	29.5061	29.5456	32.1711	34.742	35.978	38.5392	40.3815	41.9002	42.2138	43.0591	45.136	45.7898	48.3887	48.0542	48.8316	48.0121	45.9468	42.3611	39.0739	35.1272	30.0064	25.3127	21.0175	16.559	12.9385	10.2614	8.20228
486.06	0	0	0	0	2.4527	9.77094	13.9576	10.2182	0	0	2.25147	2.0325	3.5854	8.01363	30.3213	46.9679	49.2242	49.5099	46.2581	39.0489	32.6229	28.9697	28.5016	29.2444	31.8239	33.9111	35.0828	37.678	39.5165	41.2782	42.0998	42.9363	44.4719	44.822	47.9508	47.9867	48.2576	47.9822	45.7464	42.3932	39.2217	34.7763	29.7241	25.015	20.8136	16.3554	12.9211	10.4075	8.28607
486.96	0	0	0.992609	0	4.31312	8.0436	13.0857	9.87022	0	0	2.17374	2.00252	3.36633	7.64059	30.2669	46.4595	50.136	49.3127	45.5848	39.0233	32.0054	27.8311	28.1934	28.6531	30.5444	33.2373	34.8235	37.6093	38.5207	40.2115	42.2217	42.7391	43.8337	44.1779	47.2529	47.9945	47.6621	47.6287	45.6044	42.2576	38.9379	34.7181	29.662	24.9265	20.9422	16.4672	12.6767	10.3027	8.35959
488.03	17.4734	0	0	0	0	8.01934	13.0761	10.8299	0	0	1.84421	1.98213	3.16538	7.95255	30.0968	46.2131	49.7345	49.4691	44.869	38.9424	31.3234	27.737	27.8663	28.6774	29.7991	32.6984	34.268	37.1504	37.9449	39.257	41.4281	41.6881	43.1405	43.9229	46.0149	47.8493	47.0118	47.015	45.0472	42.0518	38.5765	34.3575	29.629	25.029	21.0388	16.3967	12.6927	10.1503	8.51619
488.93	9.77082	8.9196	0	0	0	6.75515	13.2596	11.1483	0	0	0.955559	2.0025	3.16326	8.22147	29.9074	45.6568	47.9051	49.1128	44.4947	38.3878	31.2283	27.9075	27.4017	28.1739	29.819	32.2169	33.5657	36.4151	37.7004	38.5753	39.8121	41.7557	42.3569	43.5178	45.3833	47.4311	46.6257	46.6483	44.6534	41.5248	38.6431	34.1694	29.4807	25.2579	20.8043	16.3232	12.6974	10.1306	8.74304
490	4.08967	14.4157	0	0	0	7.4175	13.1786	9.1459	0	0	0	1.90104	3.01106	8.26373	29.2528	45.2147	47.0278	48.1765	43.8058	38.1282	30.7656	27.9767	26.7925	27.5675	29.6578	31.6526	32.6807	35.1279	37.198	38.4773	39.3445	41.794	41.8077	42.7957	45.4285	46.8931	46.8822	46.1014	43.8823	41.2043	38.491	33.9388	29.3009	25.0369	20.6229	16.2348	12.8997	10.4857	8.76646
491.06	4.02932	15.1152	0	0	2.39748	6.31769	12.7834	8.95219	0	0	0	1.63951	3.05241	7.94803	29.2448	44.4292	46.7812	47.6428	43.6852	37.6012	30.7162	27.0902	26.3838	26.6787	29.1452	30.7215	32.5646	33.935	36.4999	37.524	39.1291	41.2551	41.4245	42.0683	45.2977	45.91	46.4273	45.5938	43.4827	40.9718	38.0076	33.8831	29.2185	24.8003	20.6789	16.4259	12.7933	10.6516	8.78019
491.96	11.2912	6.36218	2.02414	1.31356	0	6.56468	11.9319	9.79558	0	0	0	1.56617	3.03571	7.52591	28.7918	44.3064	46.5011	46.9078	42.7902	37.1601	29.786	26.2522	26.2102	26.2344	28.208	30.3042	31.7249	33.8912	35.8192	36.582	38.981	39.9819	40.8637	41.6987	44.7624	45.3242	45.7049	45.49	43.1095	40.5902	37.1927	33.6557	28.8973	24.6095	20.5274	16.244	13.0538	10.6088	8.65043
493.03	17.7584	0	1.86607	0	3.90113	5.84917	11.01	10.2738	2.44693	0	0	1.13097	3.03031	7.06269	28.1801	44.0665	46.0166	46.3969	42.0555	36.4052	29.6166	25.9871	25.8319	25.4042	27.8492	29.9707	32.0437	33.5767	35.3968	35.7739	38.3868	39.6117	40.3596	41.4785	44.0844	44.9837	44.9554	44.8555	43.1694	40.2236	37.1393	33.1801	28.4154	24.3802	20.2264	16.3136	12.9304	10.5141	8.70602
493.93	11.8045	0	0	0.788054	1.81971	6.70669	10.0472	8.79872	3.34794	0	0	0.823908	2.73912	6.80356	27.6744	43.6452	45.8398	46.0696	41.3773	35.9418	29.1121	25.5448	25.3052	25.2026	26.7642	30.1941	31.3146	32.6501	34.7678	35.7682	37.8808	39.1875	40.1238	41.3104	43.2798	44.2537	44.9585	44.2636	42.7763	40.1166	37.0591	32.8612	28.343	24.2442	20.2565	16.2575	12.7904	10.5024	8.76815
495	4.30436	0	7.19526	2.92292	2.11143	5.94567	9.5671	8.32435	3.23175	0	0	0.959542	2.74813	6.80127	27.5708	43.0824	44.9457	45.0265	41.0187	35.4109	28.7463	25.0669	24.4878	25.2403	26.255	29.2515	30.8062	31.8746	34.282	35.4685	36.9235	38.1922	39.3827	40.5531	42.5099	43.3588	43.9635	43.9227	42.083	39.2013	37.0558	32.4558	28.3935	24.2764	20.3631	16.1938	12.61	10.4565	8.71294
496.06	2.18447	0	7.26788	2.61937	0	5.32078	8.99778	9.04695	3.24366	0	0	1.01725	2.59819	6.75735	27.3087	42.3466	43.9357	44.179	40.5408	35.0401	27.6152	24.6286	23.9908	24.7579	25.8652	29.0187	29.6539	32.3414	33.7097	34.8278	35.4821	37.5457	38.372	39.4823	41.7583	42.989	42.7255	43.6954	41.3386	38.3109	36.2102	32.253	28.3434	24.3609	20.2595	15.8138	12.8773	10.5967	8.81051
496.96	9.94088	0	1.26108	0	0	7.0963	8.21948	8.96609	3.43529	0	0	0.448749	2.3344	6.54597	26.9017	41.0858	43.3034	44.1557	40.359	34.7328	27.0807	24.1333	23.8529	24.007	25.8258	28.3422	29.7228	31.4821	33.1347	34.1375	34.798	36.8135	37.4874	38.8129	41.1925	42.6583	41.9816	42.8513	40.8163	37.8847	35.6467	32.0875	27.8644	24.3076	20.0951	15.7307	12.9964	10.5505	8.86053
498.03	7.64244	3.14064	0	0	0.722923	7.86321	8.24106	7.72192	3.38934	0	0	0.39086	2.1867	6.8522	26.8303	40.3017	43.8901	44.4365	40.4277	34.1795	27.1432	23.6518	23.6921	23.4901	25.478	27.9653	28.9271	30.5353	31.9665	33.8681	34.5259	36.0014	36.9889	38.0912	40.5461	42.2611	41.5446	42.8133	40.6027	37.8736	35.0189	32.1414	27.5909	24.1528	19.9981	15.8828	12.9227	10.6387	8.97765
498.93	7.88663	8.78224	1.6775	0	3.38721	7.19114	7.98495	6.69601	3.95265	0	0	0.550285	2.2248	6.62046	26.0044	40.4564	43.0558	43.4585	40.0208	33.7964	26.9408	23.7316	23.1557	22.8025	24.8591	27.0404	28.0659	30.2296	31.0813	33.22	34.5497	35.2287	36.5	37.8525	40.135	41.1912	41.4195	42.3567	40.0844	37.823	34.9849	31.5834	27.2204	23.8694	19.83	16.208	12.6813	10.5684	8.90715
500	7.66111	7.14521	2.48358	0	6.83831	7.44338	7.45155	6.90792	4.81321	0	0	0	2.17095	6.36319	25.0197	40.2208	41.9597	42.2743	39.2518	33.7326	26.5207	23.4436	22.5865	22.6113	24.2497	26.4659	28.054	30.0032	30.637	32.5066	33.9664	35.1364	36.2292	37.3318	39.9235	40.2111	40.9231	41.5165	39.5863	37.3355	34.6592	31.1307	27.073	23.3825	19.6034	15.9477	12.6241	10.7554	9.05519
501.04	8.08725	8.0597	3.65176	0	6.28166	8.30486	7.70841	8.21128	5.00092	0	0	0	2.19288	5.95239	24.6515	39.3137	41.6027	41.8067	38.26	32.933	26.0076	22.6817	22.3519	22.2915	23.9709	25.9248	27.7717	28.8821	30.2906	31.1948	32.9751	34.4902	35.8586	36.8607	39.6018	39.7778	40.6712	40.5463	38.8756	36.7346	34.3483	30.9804	26.7482	23.015	19.3755	15.6463	12.7509	10.7491	9.11487
501.94	9.30991	0	5.89279	0	0.905481	7.25991	7.86707	7.91696	4.54925	0	0	0	2.40476	6.33721	24.6846	38.6085	42.038	40.9908	37.24	32.1522	25.6414	22.009	22.3345	21.9485	23.3361	25.3254	27.5734	27.9001	29.8138	31.0851	32.022	34.2511	35.3527	36.0126	38.83	39.6037	39.7828	40.2296	38.8582	35.9724	34.184	30.9082	26.582	22.8787	19.1949	15.4254	12.716	10.9175	9.14658
502.98	9.46825	0.841378	12.2307	2.07544	0	5.96901	7.42852	6.98495	4.13984	0	0	0	2.39147	6.29144	24.8539	37.8368	40.9769	40.2798	37.2602	31.1966	25.3862	21.6483	21.8135	21.1467	22.9315	24.9368	27.2874	27.6544	29.4284	30.5595	31.8285	33.734	34.6905	35.8142	38.2508	38.8592	39.2068	39.5709	38.2723	35.905	33.7307	30.6011	26.389	22.6928	19.2523	15.6081	12.6698	10.8323	9.11983
504.02	10.3076	8.77777	9.8594	2.43586	3.55662	8.53485	6.82994	6.33284	4.23343	0.939685	0	0	1.90782	6.31862	24.3785	37.3768	39.7555	39.9661	36.8307	30.7184	24.6693	21.3463	20.9775	20.7342	22.552	24.3302	26.9175	27.4861	28.9027	30.2049	31.5668	32.9504	34.2142	35.2864	37.4721	38.2384	38.29	38.6749	37.6627	35.5899	33.0803	29.9343	25.9445	22.6587	19.3422	15.5557	12.5781	10.622	9.16667
505.07	0	12.4141	9.92844	0	5.4868	8.55157	7.36688	7.02551	3.34783	1.17295	0	0	1.67726	5.90401	23.9723	36.9032	39.0856	39.4316	35.994	30.3797	24.1247	21.0827	20.4888	20.3594	22.3251	23.9142	25.348	26.8331	28.5502	29.5605	31.0628	32.0801	33.5909	34.577	37.0852	38.131	37.7526	38.1479	37.155	35.0334	32.3056	29.4697	25.3174	22.5541	19.2252	15.3793	12.5712	10.5338	9.20776
505.97	0	2.09676	5.39493	2.39129	2.907	7.3868	7.4635	6.55474	3.52939	1.57183	0	0	1.69447	5.77305	23.2362	36.2491	38.9271	38.2697	35.0243	30.2531	23.6896	20.5815	20.15	20.6344	22.0021	23.2031	24.4236	26.2158	28.0556	29.2521	30.2964	32.1347	32.9206	33.9522	36.5414	37.7814	37.1571	37.7394	36.6196	34.1906	32.2913	29.0093	25.0757	22.355	18.8903	15.2499	12.4997	10.6291	9.32291
507.01	0	0	4.36941	3.28014	0	6.4913	7.36892	6.29417	3.8827	1.26914	0	0	1.61945	5.39114	22.8893	35.5385	37.8639	37.4641	34.6263	29.8081	23.5908	19.8921	19.7845	20.431	21.7973	22.5918	24.1861	25.9879	27.6448	28.8561	30.0623	31.7214	32.3238	33.4572	36.009	37.3203	36.832	37.1645	35.7738	33.5038	32.0969	28.5236	25.1549	21.9023	18.7706	15.2228	12.7451	10.8247	9.40161
508.05	0	0	1.70105	0	0	7.54492	8.01346	5.27685	4.17066	1.14533	0	0	1.23036	5.42171	22.3087	35.2498	36.9548	37.5189	34.1619	29.3259	22.8637	19.6264	19.143	19.9574	21.3613	21.9298	24.1873	25.9428	26.7256	28.2072	29.4705	30.6036	31.8434	32.6651	35.2227	36.529	36.215	36.4254	35.4099	32.9943	31.6649	28.245	24.9735	21.6675	18.7727	15.2831	12.7727	10.9331	9.44363
508.95	6.61029	0	3.81512	0.99241	0	8.51084	7.88312	4.82116	3.50843	1.32638	0	0	1.23154	5.17138	21.8842	34.7147	36.3782	36.7404	33.0523	28.5928	22.3151	19.0779	18.9409	18.9833	20.9654	22.0183	24.3922	25.0706	25.7904	27.7549	28.6942	29.6489	31.1584	31.705	34.5245	35.8591	35.5691	36.1076	35.0442	32.9962	30.9151	28.0455	24.7542	21.5754	18.808	15.0407	12.5209	10.9393	9.37381
510	17.6652	6.07059	0.92719	3.8335	0	9.06638	8.29675	4.40061	3.0648	1.84596	0	0	0.715348	5.12461	21.6191	33.9549	35.9381	35.93	32.4176	27.9962	21.9342	18.3658	18.7101	18.6276	21.0743	21.7973	23.5536	24.3675	24.9768	26.6594	27.9182	29.4744	30.5356	31.2831	33.6386	35.0941	34.6574	35.6817	34.2323	32.3959	30.5292	28.0121	24.4208	21.4002	18.6149	15.0357	12.3065	10.8537	9.34214
511.06	15.614	2.88908	0	1.6043	1.96117	9.17129	7.50573	4.68573	3.08936	1.71165	0	0	0	4.77567	21.4274	33.4923	35.207	35.5044	32.1751	27.3504	21.6971	18.0192	18.5582	18.1699	20.2553	21.407	22.6148	24.0937	24.5355	26.6782	27.4964	28.944	29.5161	30.9051	32.8162	34.4469	34.0965	35.0226	33.4372	31.5403	30.2749	27.1014	24.1061	20.9933	18.3853	15.0466	12.5259	10.7812	9.37859
511.96	6.85848	0	0	3.94798	5.01129	6.19554	8.55837	4.75634	3.25136	1.31361	0	0	0	4.76916	21.1262	32.4771	34.3707	35.2468	32.4462	26.9023	21.3278	18.2016	17.8847	17.825	19.5283	20.7124	22.0451	23.6526	24.414	26.3827	27.2283	28.3035	29.116	30.7203	32.6211	33.4631	33.5697	34.0662	33.1656	31.1869	30.1014	26.6142	23.5964	20.5027	18.1544	14.9685	12.5951	10.8162	9.45339
513.03	0	0	2.0431	7.32683	4.38661	5.24766	8.43179	3.9111	3.94519	1.23489	0	0	0	4.78495	20.8699	31.7963	33.9869	34.2134	31.3203	26.3066	21.1926	17.7642	17.5861	17.3052	19.158	20.3884	22.561	23.3399	24.1649	25.9863	26.5577	27.7929	28.6101	29.9326	32.3536	32.9284	33.2853	33.7346	33.1416	31.3387	29.1291	26.4632	23.3156	20.5005	17.9859	14.8619	12.5702	10.8109	9.40459
513.93	0	3.27113	10.5282	4.19581	1.49197	5.39334	8.7955	3.88278	3.8715	1.40784	0	0	0	4.78819	20.8836	31.4302	33.677	33.2996	30.2269	25.9296	20.5128	17.1183	17.2476	17.348	19.2221	20.0516	21.8005	22.5671	23.6941	24.9185	25.9504	27.6049	28.2866	29.4931	31.5503	32.6909	32.9652	33.2947	32.8271	30.5813	28.3977	26.648	23.1042	20.5216	17.7663	14.9571	12.3843	10.7298	9.43751
515	9.65497	8.72438	10.2647	0	3.04586	6.29864	7.602	3.7987	3.47623	1.38732	0	0	0	4.25615	20.6059	30.945	33.3297	32.8805	29.5273	25.3652	19.923	16.4847	16.7495	17.1577	18.2945	19.5084	20.876	21.8253	22.8709	24.3327	25.2557	26.8037	27.4381	28.8505	30.9974	32.2204	32.6052	32.7145	32.0093	29.3968	28.0525	26.3276	22.8839	20.3395	17.5924	14.887	12.3837	10.6634	9.53281
516.06	13.2893	10.6015	6.04251	0	2.41762	6.85616	7.87539	3.87089	1.97915	1.26478	0	0	0	4.13922	19.5902	30.4376	32.3352	32.7686	29.6365	24.7064	19.2877	16.7377	16.3023	16.6846	17.5139	19.0317	19.9985	20.9593	22.5649	23.982	24.8522	26.2402	27.0656	28.7882	30.2906	31.662	31.6629	31.8498	31.1767	29.099	27.7459	25.6623	22.5513	20.0039	17.4584	14.5376	12.3238	10.6917	9.6449
516.96	4.22296	5.74575	0	0	1.34432	7.01568	7.21922	3.59931	1.66439	1.4064	0	0	0	3.89231	18.3668	29.5836	31.502	31.8171	29.1178	24.1828	19.2665	16.3748	16.051	16.1769	16.9963	18.9227	19.6587	20.9348	22.4519	23.573	24.3994	25.5238	26.5307	28.0421	29.9661	30.8315	30.7849	31.4588	30.4339	29.1652	27.1517	25.005	22.2357	19.8731	17.3753	14.2822	12.5789	10.7821	9.59492
518.03	0	5.63189	4.16834	0	0	7.49863	6.6041	3.85945	1.29254	1.20278	0	0	0	3.28476	18.3468	29.0298	31.0762	30.7833	28.5365	23.7207	19.057	16.3812	15.8346	16.0366	17.1724	18.9041	19.2916	20.6811	22.1886	23.1242	23.9757	25.282	26.2636	27.0937	29.5099	29.7804	30.0737	30.9243	29.82	28.9308	26.8401	24.7454	22.0334	19.5421	17.2089	14.3031	12.5204	10.8495	9.48277
518.93	4.20462	4.74437	10.004	4.89365	0	6.77906	6.23412	4.53152	0.97879	0.925304	0	0	0	1.99007	18.2569	28.32	30.4825	30.2746	27.7921	23.4404	18.9312	15.7579	15.4711	16.0656	16.8071	18.502	19.1418	20.4061	21.4111	22.5501	23.4447	24.6656	25.7916	26.3537	29.8065	29.1235	29.9364	30.3944	29.1577	28.1704	26.8608	24.3804	21.7459	19.0071	17.0563	14.254	12.3985	10.8868	9.53463
520	7.92556	6.21813	9.65628	2.45454	0	5.30057	6.31331	4.7112	0.448214	0.704943	0	0	0	0.154152	17.7784	28.3966	29.8909	29.8775	27.1836	22.8922	18.547	15.4857	14.8297	15.7576	16.6612	17.9374	18.5874	20.0171	21.0777	22.1015	23.2445	24.3831	24.9386	26.2577	28.9524	28.9046	29.626	29.7186	29.2058	27.7283	26.4345	24.135	21.5379	18.8202	16.9085	14.2401	12.3375	10.9971	9.62121
521.04	12.2078	0	10.8129	0	0	2.13917	5.99861	4.73663	1.2412	0.912879	0	0	0	0	16.8083	27.6369	29.2767	29.2954	26.6608	22.4684	17.9487	15.0969	14.4821	15.0508	16.0944	17.1685	18.0417	19.5986	20.5793	21.7219	22.4173	23.5892	24.2401	26.0647	27.914	28.8338	28.8318	28.7858	29.1459	26.9834	25.9861	23.5938	21.1081	18.8102	16.8979	14.1419	12.4268	11.0672	9.84321
521.94	6.95137	0	8.51345	0	0	3.13939	6.029	4.19994	1.20875	0.881435	0	0	0	0	16.6115	27.3702	29.0357	28.6633	26.2333	21.9813	17.3621	15.0348	14.5446	14.5263	15.7953	16.4778	17.3528	18.6289	20.2492	20.9421	21.6169	23.1453	24.0041	25.2918	26.8208	28.0304	27.9068	28.164	28.7002	26.3476	25.5261	23.3355	20.7234	18.7587	16.6124	13.9344	12.2516	10.9625	9.93093
522.98	8.47529	0	0	0	0	3.5563	6.39521	4.27762	0.912685	0.99175	0	0	0	0	16.445	26.7037	28.3001	28.3777	25.6272	21.6393	16.8926	14.4288	14.3604	14.4467	15.0119	16.2923	17.4687	18.3277	19.5082	20.2402	20.9994	22.628	23.9959	24.5004	26.2606	27.0955	27.1818	27.974	27.6312	25.7304	25.0761	22.7538	20.1689	18.4534	16.365	13.7338	12.0719	10.7787	10.0653
524.02	0	0.693979	0	0.560722	0.148492	4.24928	6.31757	4.46859	0	0.92834	0.269643	0	0	0	16.2064	26.3388	27.7792	27.7564	25.1386	21.3598	16.7321	13.9331	13.9455	14.2762	15.1446	16.2361	16.8568	18.0721	19.1321	19.6081	21.086	22.2057	23.2014	23.6582	25.8621	26.3979	26.938	27.5754	26.8546	25.5774	24.6556	22.6517	20.0811	18.3654	16.1988	13.6779	12.0058	10.8177	10.1007
525.07	1.00801	5.57656	0	5.17815	3.85198	3.10424	6.03813	4.23466	0	0.680507	0.0493614	0	0	0	15.9931	25.0807	27.309	27.4218	24.6019	20.9159	16.5503	13.7295	13.7011	14.0532	14.9681	16.2186	17.0649	17.7236	18.7854	19.6048	20.4227	21.7075	22.5852	23.3888	25.263	26.3844	26.5312	26.6726	26.2635	25.2576	24.3707	22.1828	19.7368	18.1779	16.1702	13.6541	11.9902	10.8954	10.1131
525.97	2.63709	6.54643	0	4.42258	0.711549	4.59627	5.19996	4.36431	0	0.287162	0	0	0	0	15.7009	24.3586	26.4235	26.7918	24.1785	20.5153	16.2557	13.717	13.7136	13.5819	14.4482	15.8149	16.1979	16.7554	18.3186	19.177	20.0078	21.3446	22.0199	22.8613	24.9933	25.8671	25.6667	26.1118	25.6881	25.0837	24.0346	21.8234	19.4669	17.6694	15.9203	13.5779	11.9708	10.8825	9.95949
527.01	2.07905	5.82659	0	0	0	4.57108	4.57275	4.44289	0	0.199335	0	0	0	0	14.9787	23.5042	25.5918	25.7618	23.649	19.9045	15.6222	13.291	13.6951	13.2996	13.8171	15.4256	16.1066	16.3679	17.8597	19.0515	19.6223	21.2181	21.6997	22.6317	24.2264	25.2374	24.8575	25.7901	25.1329	24.4922	23.4181	21.2021	19.1258	17.3453	15.6328	13.5064	11.9567	10.9543	9.92397
528.05	0	5.45869	0	0	0	4.05283	4.00136	4.15231	0	0.201498	0.185827	0	0	0	13.8705	23.2797	25.4211	24.9741	23.2736	19.3108	15.031	12.4745	13.307	12.9012	13.6511	14.7822	15.7123	16.2712	17.2354	18.4169	19.7328	20.6645	20.9823	21.9294	23.9463	24.8095	24.4801	25.3935	25.1002	23.9078	23.0731	20.911	18.9831	17.0935	15.3607	13.4649	11.8751	11.0495	10.0043
528.95	0	6.50965	1.73412	0	0.233642	4.58522	4.35054	3.95269	0	0.14803	0.237539	0	0	0	13.3481	22.7382	25.1758	24.9786	22.8194	18.6818	14.7126	12.3571	12.4688	12.7331	13.6104	14.5265	15.8714	16.3454	16.9215	17.639	19.0389	20.0257	20.7958	21.5973	23.2765	24.8381	24.6486	25.3541	24.5316	23.3561	22.3942	20.5739	18.6934	17.0322	15.277	13.1619	11.8167	10.8685	9.9855
530	0	0	10.4564	2.53238	2.27775	3.64322	4.77089	3.68805	0.443296	0.420775	0.112739	0	0	0	12.6792	22.6334	24.047	24.9885	21.9534	18.5926	14.4209	12.4288	12.0439	12.1759	13.2927	13.9728	15.0255	16.2513	16.7686	17.1593	18.2371	19.3312	20.4176	20.9856	23.0679	23.9611	24.2989	24.8679	23.8691	23.1185	21.96	20.4002	18.4613	16.712	15.3289	12.8995	11.7922	10.7828	9.9182
531.04	0	0	4.73723	0.774611	2.92521	3.10316	5.25456	4.19931	0.191398	0.331997	0.371897	0	0	0	11.4604	22.752	23.0837	24.2662	21.0696	18.4045	14.1028	12.3795	11.9291	12.1436	13.1098	13.5824	14.444	15.8618	16.6429	17.1058	18.1586	18.9995	19.8724	20.9491	22.338	22.8519	24.0553	24.2097	23.2298	22.3694	21.2049	20.041	18.3798	16.6814	15.1724	12.8088	11.6545	10.8554	9.87459
531.94	0	0	0	0	5.77868	2.62311	5.06713	3.78421	0.311943	0.131327	0.569836	0.360033	0	0	7.58929	22.284	22.8111	23.443	20.9802	18.0357	13.8149	11.7526	11.716	12.1963	12.4411	13.6806	14.2178	15.468	16.2899	17.0331	18.3251	18.6136	19.5383	20.4766	21.7536	22.2788	23.1563	23.4126	22.686	21.8566	21.1474	19.6175	17.9865	16.4967	14.8266	12.9108	11.4894	10.8204	9.98419
532.98	2.16548	0	0	1.26954	2.72349	4.05428	4.8879	3.01976	1.46591	0	0.724565	0.539243	0	0	0	21.2782	22.5863	23.1948	21.0595	17.7078	13.5977	11.6302	11.3947	11.7133	11.8269	13.6815	14.1635	15.2313	15.5255	16.3308	17.7384	18.287	18.8778	19.864	20.9567	22.2506	22.4012	23.0363	22.1369	21.3594	20.7261	19.165	17.543	15.9563	14.4828	12.7179	11.2479	10.5252	9.83326
534.02	0	0	0	0	0	4.33684	5.0984	3.53863	2.54567	0.564103	1.04349	1.19133	0.950248	0	0	20.2553	22.008	22.4411	20.448	17.2309	13.196	11.3245	11.4125	11.0661	11.2573	13.1147	13.7193	14.6779	15.1286	16.0445	16.5153	17.5183	18.319	19.0557	20.5249	21.862	21.584	22.428	22.0225	21.2922	20.489	18.8665	17.152	15.4083	14.2769	12.4293	11.2002	10.3035	9.70594
535.07	0	0	0	0	0	5.05702	5.58289	4.54683	3.33868	1.3173	1.30223	1.60249	2.30688	0	0	19.7751	21.9362	21.2741	19.4856	16.541	12.8587	11.1738	11.3345	10.5882	11.1094	12.8007	13.1514	14.2428	14.6768	15.6998	16.1704	16.9663	17.773	18.6238	20.1425	20.9306	21.3254	21.8525	21.8329	20.7268	19.859	18.5723	17.1105	15.0897	14.0487	12.1957	11.2364	10.3068	9.48506
535.97	0	0	0	0	0	6.22079	5.85759	5.60146	4.19419	1.88101	2.00295	2.7681	3.10495	0	0	19.2243	20.8708	20.8543	19.1291	16.078	12.8747	11.0548	10.8695	10.9738	11.1052	12.786	12.81	13.9158	14.4982	15.2309	15.7771	16.7307	17.7081	18.3044	19.6951	20.2972	21.017	21.3675	21.1752	20.3031	19.5296	18.0756	16.8908	15.1691	13.852	12.1081	11.1131	10.2015	9.61687
537.01	1.28304	0	0	0	2.45533	5.94506	6.19457	5.77879	5.4765	2.43757	2.89447	3.41521	4.29381	0	0	18.5257	20.2316	20.782	18.8596	16.1812	12.6771	10.7793	10.51	10.6899	11.0939	12.3796	12.6139	13.8678	14.0666	14.7893	15.6789	16.5807	17.0352	17.7905	19.1981	19.8968	20.6085	20.9726	20.6655	19.8286	19.276	17.5956	16.4911	14.9617	13.7084	12.0509	10.8641	10.1026	9.6017
538.05	0	0	3.55289	0	0.361587	5.02873	7.12301	7.44388	6.74875	3.35385	4.3651	4.66121	5.3745	0	0	18.5261	19.3678	20.4263	18.4288	15.8791	12.1227	10.1905	10.1418	10.2687	10.8992	11.939	12.5602	13.555	14.2412	14.2029	15.4746	16.2074	16.7081	17.3174	18.6059	19.5565	20.124	20.6901	20.4303	19.4186	18.9344	17.1645	15.968	14.7581	13.4969	11.8675	10.6144	9.87036	9.44863
538.95	0	0	0	0	0.39419	6.59759	8.35964	8.60249	8.5542	5.18058	5.89866	6.02462	7.27275	0	0	18.4415	19.5162	19.603	17.9744	15.306	11.7893	9.93432	10.0695	10.0235	10.7896	11.7767	12.3727	12.975	13.8275	13.8953	15.2847	15.9133	16.368	17.2956	18.5961	19.2277	19.5035	20.0328	19.9515	18.9482	18.5624	17.1039	15.4864	14.3527	13.2311	11.6068	10.471	9.78671	9.12937
540	0	0	0	0	0	7.42547	9.26481	10.8584	10.6793	7.82372	8.23866	8.78088	9.40982	0	0	17.8833	18.8476	19.2296	17.3585	14.8793	11.8066	9.77461	9.80793	10.0139	10.977	11.3461	12.0682	12.5461	13.1983	13.5017	14.4788	15.7621	16.1407	17.2115	18.3738	18.7303	19.1065	19.3795	19.4536	18.3982	17.8315	16.7734	14.9559	14.2272	12.9402	11.3093	10.2798	9.7417	8.98496
541.04	0	5.05343	0	3.1257	0	8.2565	10.1913	11.9512	12.7844	10.3984	9.96803	11.6515	11.8999	0	0	15.5338	18.7609	18.7833	16.9611	14.7563	11.5707	9.65207	9.49084	9.81126	10.7531	10.8931	11.4624	12.2868	12.9389	13.4692	13.753	15.2395	15.6994	16.7153	18.0094	18.1655	18.5905	19.2253	18.8893	18.0538	17.2535	16.5117	14.7648	13.905	12.6422	11.1305	10.0824	9.73002	8.86126
541.94	0	0	0	9.44811	0	9.72565	11.7707	14.3809	15.5931	13.1421	12.1086	14.0697	14.1696	7.89351	0	10.9413	17.9085	18.4015	16.7871	14.3716	11.2705	9.50482	9.06855	9.285	9.9023	10.6631	11.1186	12.2861	13.0412	13.1485	13.471	14.795	15.2424	16.2375	17.0322	17.776	18.2977	19.0916	18.515	17.5136	16.7933	15.847	14.6027	13.797	12.3293	10.8356	9.79107	9.71314	8.86032
542.98	0	0	0	7.6315	3.42509	10.6935	12.7881	16.3106	17.8674	15.5345	14.3936	16.4853	17.6727	15.1086	0	2.8497	17.52	18.0347	16.1688	13.841	10.9286	9.43049	8.56698	9.21934	9.09766	10.4227	10.7891	11.8883	12.6678	12.824	13.5155	14.304	14.7641	15.6918	16.8438	17.5404	17.8438	18.6949	17.9931	17.0152	16.6139	15.6136	14.3555	13.4245	12.1541	10.6924	9.7171	9.44276	8.79865
544.02	5.20526	0	0	10.1354	8.98693	10.8615	14.4144	20.0611	20.9814	18.8525	17.5188	19.298	21.3684	21.1929	0	0	17.0247	17.4544	15.6917	13.6189	10.2412	9.03526	8.61609	8.58687	9.28986	9.80525	10.7446	11.5286	12.1572	12.6521	13.437	14.0334	14.519	15.3341	16.6422	17.2503	17.6523	17.7676	17.6905	16.6317	16.1966	15.3215	13.9323	13.1346	11.9747	10.5557	9.72626	9.1211	8.72156
545.07	12.1947	13.2965	3.25888	3.82076	14.7071	13.1358	16.0993	21.8095	25.1748	22.0888	20.4745	22.4643	24.4586	25.8045	0	0	16.5546	17.0412	15.162	13.1152	9.89085	8.64354	8.89085	8.55908	9.31728	9.64331	10.5643	11.1578	11.8531	12.4906	13.1183	13.5419	14.2465	14.825	16.4247	16.7498	17.1129	17.5087	17.2974	16.1744	15.5901	15.1799	13.7735	12.6689	11.8236	10.4924	9.54232	8.74755	8.5033
545.97	11.6014	5.00546	0	7.48125	9.66279	15.6468	18.2247	24.6501	28.887	26.4229	23.6009	24.7278	27.3093	29.5693	0	0	15.9404	16.7293	15.3056	12.724	9.97912	8.37166	8.60454	8.51528	9.00255	9.6516	10.3181	11.005	11.764	12.3401	12.7782	13.2285	13.9084	14.3908	15.4975	16.3139	16.7583	17.0101	16.821	15.893	15.2361	14.7727	13.4899	12.467	11.4915	10.2958	9.13396	8.60537	8.37058
547.01	7.22024	4.73278	2.50651	7.54335	8.06461	15.7481	19.5905	25.5786	30.9464	29.6748	25.3461	27.679	30.4301	32.3559	0	0	16.2308	16.3869	14.9966	12.2253	9.83238	8.40501	8.05209	8.76696	8.54128	9.53032	9.84057	10.911	11.3335	11.593	12.4173	12.8738	13.456	14.0727	15.1112	15.8513	16.3952	16.5237	16.3658	15.6308	15.125	14.4868	13.2202	12.1966	11.2395	9.98855	8.91191	8.60029	8.11615
548.05	10.7704	3.19556	7.75657	9.46519	7.76503	15.0288	21.3583	26.6774	31.3094	31.5361	27.0763	29.8544	32.5309	33.6229	0	0	16.0893	15.622	14.7507	12.0296	9.5466	8.09843	7.8049	8.2891	8.45337	9.3457	9.57616	10.4805	11.1217	11.0322	11.9888	12.57	13.1325	13.9265	14.6656	15.7875	16.2208	15.809	16.1312	15.5211	15.057	14.0326	12.9214	12.1344	10.9258	9.69308	8.69953	8.50808	7.95745
548.95	10.2489	5.50548	15.8267	8.28515	12.4531	16.8191	22.0952	27.8441	33.2422	32.4357	28.6688	31.5118	33.6692	35.3144	0	0	15.0186	15.0555	14.114	11.5772	9.16064	8.02022	7.69634	7.9153	8.25588	8.91615	9.40406	10.0769	10.7557	11.138	11.673	12.1263	12.8423	13.5325	14.8418	15.545	15.6838	15.6269	15.8793	15.1016	14.4808	13.5851	12.5158	11.8467	10.6854	9.47053	8.53584	8.37423	7.88506
550	0.285841	3.51333	16.1907	12.8806	12.0057	18.4002	22.5494	29.8133	35.2468	34.0983	30.0111	32.0689	34.9623	36.9558	0	0	13.4532	15.1245	13.8311	11.3396	8.9947	7.69553	7.51265	7.68212	8.12075	8.52077	9.33892	9.88591	10.4069	11.1973	11.6562	12.0129	12.6285	13.0101	14.5083	15.1383	15.0761	15.457	15.516	14.6866	14.1401	13.207	12.2146	11.4955	10.5492	9.32048	8.50374	8.12406	7.78762
551.04	0	6.22271	16.7559	15.9955	14.4161	18.1779	22.8123	31.0687	37.7715	35.7942	31.129	32.6702	36	38.1034	14.7179	0	11.6876	14.9028	13.5011	11.0421	8.95083	7.67367	7.57084	7.61904	8.00486	8.4136	9.30538	9.90403	10.0225	10.5949	11.1523	11.7232	12.3545	12.6006	13.9526	14.3123	14.7627	15.2438	15.0636	14.3272	13.8035	12.9106	11.9257	11.1195	10.5098	9.1105	8.4118	7.99919	7.68413
551.94	4.9047	4.26947	18.7502	7.95059	15.6662	17.3867	22.8651	30.8394	37.8502	37.0011	32.4605	32.7698	36.8025	38.473	24.5108	0	7.83376	14.4973	12.8531	11.0495	9.05246	7.49498	7.52269	7.36803	7.5383	8.52059	9.22544	9.4374	9.78292	10.0874	10.5831	11.5059	11.9853	12.3267	13.1583	13.9128	14.3687	15.0046	14.7487	14.1655	13.4914	12.5249	11.7392	10.8636	10.3327	8.9175	8.14491	7.7243	7.44968
552.98	19.5424	8.06251	18.4241	8.02994	15.289	18.4738	22.7141	31.5697	38.6938	37.933	33.1684	34.2917	37.1394	39.644	29.7587	0	0.664315	13.8626	12.2193	10.5836	8.48836	7.30012	7.32867	6.87573	7.41667	8.50073	8.97214	9.36901	9.67601	10.1972	10.1442	11.2123	11.5799	12.1145	12.9282	13.6113	14.0088	14.7101	14.1107	13.6173	13.1133	12.2025	11.2662	10.6137	9.8925	8.72236	7.91533	7.51533	7.29258
554.02	17.4439	6.79015	16.3146	15.7533	11.9396	20.4526	23.1997	32.1363	39.0893	38.0801	32.8246	35.1846	37.9632	40.8828	32.4052	0	0	13.4829	11.7934	9.96429	8.03551	7.11709	7.17533	6.85035	7.15663	8.01681	8.80192	8.98975	9.29078	10.2331	9.90314	11.097	11.2938	11.9645	12.7287	13.6324	13.5572	14.1609	13.6464	13.1784	13.0408	12.0309	11.1723	10.4861	9.61804	8.60432	7.87445	7.43844	7.01447
555.07	20.1022	1.97076	19.549	19.8264	11.8427	19.6188	23.9029	33.2264	40.6784	38.8494	33.562	35.8472	39.1922	41.9429	33.7668	0	0	13.0677	11.6375	9.56152	7.77682	7.06283	7.05664	6.94857	7.07752	7.83338	8.28932	8.72498	9.42438	9.72574	9.71622	10.6824	11.0017	11.5419	12.3964	13.227	13.2867	13.4085	13.3653	12.6834	12.6306	11.9666	11.0337	10.2926	9.42949	8.51393	7.77919	7.33527	6.83047
555.97	12.8556	12.6456	20.9284	16.0403	16.2728	20.3016	24.4256	33.8142	40.6059	39.743	35.0815	36.171	40.4503	42.5431	34.7204	0	0	12.8007	11.6112	9.60619	7.59484	6.98623	6.51058	6.96052	6.7888	7.71386	7.94548	8.50075	9.33094	9.36345	9.34053	10.5666	10.8304	11.4001	12.0978	12.7489	12.9336	12.8992	13.2062	12.5413	12.3461	11.8146	10.8191	9.99825	9.21031	8.34979	7.593	7.14921	6.62105
557.01	8.16999	18.6707	11.7505	15.0073	16.4965	21.2722	25.0767	35.4845	42.4027	41.6256	37.3812	38.2577	42.1802	43.5492	35.6777	0	0	12.3494	11.51	9.41011	7.45098	6.50952	6.13918	6.73489	6.73928	7.66814	7.68178	8.83307	9.03475	8.98382	9.37152	10.2393	10.6633	11.0695	11.8816	12.1635	12.9207	12.6366	12.8495	12.1895	12.0685	11.5754	10.4221	9.65109	8.94302	8.01247	7.40673	6.88906	6.69418
558.05	2.56791	11.4371	11.7896	16.5779	17.2146	21.7645	26.2762	36.0845	43.2894	43.2909	38.829	39.8834	44.0286	45.3261	37.431	0	0	11.6715	11.0955	9.14432	7.31789	6.18401	5.93658	6.54699	6.96283	7.26069	7.78849	8.66752	8.63876	8.66765	9.264	9.80576	10.5699	10.7908	11.6553	11.9811	12.751	12.4539	12.5347	12.0393	11.9598	11.1917	10.3846	9.34848	8.76995	7.79927	7.17166	6.83854	6.64004
558.95	11.974	7.91804	10.2084	11.7539	17.2114	22.6873	26.8902	37.5965	45.8434	45.4993	40.8644	41.8128	45.8891	47.5402	38.8717	0	0	11.1029	10.4043	9.06747	7.12564	6.13423	6.17293	6.39697	7.12968	7.22586	7.43231	8.18709	8.37181	8.22052	9.125	9.43403	10.2998	10.357	11.3023	11.6339	12.0786	12.1287	12.3601	11.6558	11.6344	10.7587	10.1088	9.13629	8.61624	7.61817	6.89802	6.59481	6.36593
560	20.9435	8.53623	18.1295	7.93386	17.0607	22.3384	27.9985	38.5706	47.7487	46.8401	42.3439	43.5709	46.9055	49.3977	39.7097	0	0	10.4149	10.2929	9.10321	6.89549	5.99289	5.94533	6.09339	6.89829	7.12312	7.43356	7.59149	7.87582	8.23596	8.45378	9.18781	9.90192	10.0364	11.1343	11.4232	11.3136	12.082	11.9083	11.3343	11.3482	10.4274	9.66732	8.99886	8.37144	7.51829	6.84146	6.46386	6.11165
561.04	21.5375	10.3728	11.2389	13.8004	15.6206	22.3012	29.0119	39.2712	49.3936	48.0983	44.2235	44.2089	48.2071	50.4266	40.3321	2.0185	0	9.14076	10.213	8.78244	6.98765	5.88609	5.73731	5.95608	6.44696	6.73594	7.58106	7.38063	7.71793	8.17928	8.30867	9.12721	9.82809	9.78664	11.0267	11.2486	11.0797	11.8674	11.5096	11.0027	10.8722	10.1803	9.31178	8.78549	8.16742	7.244	6.77075	6.3311	6.05244
561.94	18.8045	15.8278	15.2998	20.4407	15.6513	21.7651	29.5448	39.7999	49.4326	48.3376	44.2956	45.0332	48.7445	51.5962	40.6013	10.4867	0	6.12709	9.97883	8.30841	6.85471	5.62481	5.80359	6.00161	6.35286	6.23729	7.42963	7.31322	7.94484	8.39264	8.23658	8.5858	9.51583	9.70724	10.5222	11.253	11.0942	11.4582	11.1224	10.8482	10.5965	9.9045	9.23843	8.60626	7.99033	7.10715	6.72021	6.28362	6.04867
562.98	11.2144	20.5423	12.7231	19.6825	15.6603	23.5108	28.9168	40.2534	48.9667	48.1848	44.4551	45.8986	48.8324	51.4934	40.6883	14.7191	0	0.17377	9.50847	7.96419	6.50898	5.56942	5.7615	5.55467	6.17065	6.42067	6.73667	7.38485	7.56594	8.02206	7.95219	8.20835	9.38603	9.42285	10.1934	10.7632	11.0528	10.9555	10.8601	10.6117	10.3607	9.78518	9.07117	8.51779	7.87308	6.91058	6.47702	6.20033	5.97842
564.02	9.39124	14.6963	10.8517	16.5521	15.5327	23.9837	28.6276	40.2147	48.2412	47.6507	43.4197	45.8364	48.2084	50.814	40.6486	17.8409	0	0	9.20153	8.01501	6.11897	5.32872	5.5967	5.28422	5.9013	6.26953	6.29535	7.25713	6.93042	7.31742	7.65558	7.89152	8.72784	8.98507	10.0265	10.4922	10.8994	10.8667	10.5147	10.2043	10.1894	9.50999	8.79979	8.29718	7.6325	6.79898	6.31706	6.13084	5.84394
565.07	9.54749	11.7572	2.00801	11.2249	20.2439	26.1969	28.2118	40.034	47.6146	47.3777	43.1044	43.8699	47.7479	50.2241	40.7329	19.2359	0	0	9.22175	7.76109	5.93722	5.49094	5.37603	5.19383	5.77738	6.01883	5.98321	7.05202	6.71034	6.97992	7.68397	7.97887	8.52399	8.99279	9.8878	10.071	10.6858	10.6135	10.2785	9.96954	9.83621	9.17631	8.58952	7.99591	7.40376	6.65625	6.11901	5.83931	5.65648
565.97	3.68672	3.80607	0.779047	14.1661	22.3573	26.3886	28.4482	39.2207	47.201	46.3341	42.3445	42.2709	46.3019	49.7764	40.6544	20.3347	0	0	9.10282	7.24113	5.82461	5.31582	5.39122	5.11855	5.65605	5.7285	5.93174	6.64613	6.95212	7.06398	7.64063	7.947	8.20304	8.91413	9.30105	9.67919	10.2355	10.2038	10.0258	9.89267	9.46933	9.00257	8.31493	7.73182	7.12985	6.51914	5.96702	5.50737	5.5044
567.01	7.98898	0	2.55228	15.0244	24.1074	25.4503	28.3221	37.7983	46.4445	45.7621	41.6995	40.9216	45.0927	49.2863	40.8622	20.7523	0	0	8.77006	6.87812	5.65284	5.26278	4.97685	4.64115	5.33747	6.20784	6.18862	6.57284	6.68181	6.98379	7.44555	7.7774	8.15289	8.74145	9.11119	9.37227	9.6777	9.78155	9.93911	9.76908	9.03057	8.93041	8.27316	7.60715	7.02722	6.36781	5.82432	5.46846	5.37131
568.05	6.77716	1.80569	8.10026	17.3607	22.4079	23.7422	27.4362	37.512	44.8453	45.086	40.9425	40.9267	44.1134	48.2569	41.4158	21.1548	0	0	8.03017	7.05674	5.8082	4.7938	4.78156	4.72249	5.29323	6.12686	6.25893	6.29992	6.44068	6.64156	7.2053	7.75496	7.83235	8.1193	8.89103	9.41615	9.41281	9.59722	9.75532	9.43294	8.90351	8.61533	8.1557	7.4559	6.91382	6.30688	5.71935	5.55613	5.36413
568.95	9.90813	7.25929	9.41355	12.1106	19.2415	22.4199	26.5332	37.6298	43.9762	44.3726	39.8643	40.9625	42.8086	47.2245	41.0882	21.8427	0	0	7.51603	7.1589	5.71613	4.74632	4.60385	4.87357	5.29315	5.89411	5.96997	6.11235	6.24841	6.67644	6.82667	7.40489	7.57738	8.08072	8.47057	9.09349	9.1374	9.42718	9.49871	9.18381	8.83193	8.26849	7.88703	7.2997	6.79968	6.2101	5.60994	5.47091	5.26098
570	0	4.98098	8.53599	8.52475	15.2255	23.608	26.9271	37.4564	42.6219	42.8168	39.3755	40.7521	41.5699	46.2453	41.1305	22.9288	0	0	6.81674	6.71234	5.41173	4.63678	4.49992	4.9012	4.90617	5.40089	5.75461	6.13362	6.11001	6.60219	6.70678	7.36843	7.33606	7.98242	8.11588	8.65771	8.87828	9.41714	9.10196	8.68336	8.68054	8.16008	7.50736	7.1461	6.51914	5.9284	5.51002	5.24693	5.03878
571.02	6.56768	8.36049	1.51503	10.3147	17.327	23.483	27.6107	36.7219	42.0361	41.3847	38.7831	40.0706	41.1849	45.3978	40.9723	23.8699	0	0	4.34434	6.3809	5.10964	4.67775	4.47065	4.49124	4.39932	5.32626	5.95475	6.24838	5.90218	6.27254	6.65392	6.99117	7.22602	7.86187	8.09189	8.36981	8.61997	9.01048	8.8433	8.30357	8.29294	7.92935	7.32959	6.98506	6.37377	5.72942	5.38519	5.05508	4.79769
572.05	8.76361	6.09885	12.3745	18.2977	14.0076	23.7611	27.4393	36.8186	42.072	40.6597	38.1834	40.8371	41.4852	45.3686	41.1604	24.6834	6.71146	0	0	6.34783	5.13066	4.44785	4.44492	4.62602	4.18407	5.03427	5.72372	5.87168	5.84426	6.14477	6.69257	6.90001	7.1204	7.26558	8.11938	8.15143	8.47047	8.59853	8.4993	8.22523	8.01856	7.67768	7.1172	6.69371	6.2439	5.6145	5.32375	5.00796	4.87363
572.94	14.961	14.1221	12.0772	18.6026	11.0592	23.4703	27.082	35.7799	43.038	41.1709	37.9381	40.1808	41.1624	44.6226	41.2205	25.3728	12.2229	0	0	6.13961	4.88011	4.27749	4.34834	4.54392	4.47872	4.96381	5.32997	5.58343	5.7177	6.18005	6.49546	6.66462	6.92985	7.07994	7.76664	8.025	8.10364	8.46865	8.33463	8.40001	7.80956	7.37973	6.94313	6.42286	6.08875	5.48376	5.09346	4.90215	4.93646
573.97	5.80504	12.1261	12.5754	11.8687	11.4613	24.6794	27.1398	35.8986	43.3683	41.5146	37.8432	39.2767	40.819	45.0915	41.5643	25.7624	15.4744	0	0	5.99919	4.69006	4.14101	4.3586	4.44905	4.21016	5.10146	4.95515	5.45552	5.77043	6.19452	6.15319	6.55187	6.68168	7.03514	7.59641	7.80277	7.9717	8.36891	8.10272	8.15245	7.69171	7.20421	6.76654	6.26025	5.92817	5.35127	4.963	4.77495	4.81169
575	17.547	16.2933	11.4136	11.4141	18.115	22.9803	27.6088	35.3822	42.8846	41.751	37.5443	38.6401	40.1889	44.9165	42.5279	26.6433	18.0232	0	0	5.76312	4.66642	4.19639	4.17624	4.07047	4.09202	4.7784	4.9814	5.42579	5.882	5.82599	5.66171	6.39751	6.44454	6.84648	7.34744	7.715	8.02387	7.97723	7.93868	7.84088	7.5473	7.07004	6.70298	6.16907	5.88806	5.23759	4.81308	4.53447	4.51711
576.02	13.53	13.3434	20.4896	12.7681	19.2637	22.8474	27.5552	36.4436	42.0141	41.2928	37.4447	39.3904	40.2505	44.8134	43.0228	27.5956	19.5909	0	0	5.44327	4.65299	4.04649	3.83802	4.03138	4.20392	4.59021	4.74641	5.12107	5.69549	5.7146	5.42431	6.1034	6.32481	6.4651	7.16999	7.60062	7.77072	7.67133	7.6162	7.61253	7.3715	6.87574	6.46031	6.0562	5.70879	5.04189	4.73023	4.52202	4.43473
577.05	0.760659	9.57494	20.6157	12.9908	17.1607	25.7442	26.9891	36.5108	41.2596	40.6204	37.9956	39.2666	40.5518	44.5685	42.8037	28.5351	20.067	0	0	5.09966	4.37678	3.88309	3.70222	3.72153	4.58696	4.57176	4.64756	5.05916	5.25878	5.64717	5.56288	5.78585	6.09898	6.38803	6.92359	7.3817	7.49409	7.69894	7.44121	7.47599	7.03376	6.68153	6.34937	5.90123	5.54028	4.91352	4.63209	4.48067	4.40292
577.94	0	1.09792	9.9885	15.7059	13.7449	25.4136	27.3106	35.9708	40.9795	39.5037	37.447	38.9173	40.6178	44.3757	42.3283	28.7763	19.905	0	0	5.16908	4.17831	3.69712	3.87566	3.40653	4.34942	4.72744	4.67552	4.96492	5.14571	5.43007	5.49231	5.49392	5.93657	6.24911	6.80455	6.97169	7.12581	7.64146	7.23828	7.0787	6.76787	6.49825	6.15248	5.69551	5.35586	4.85836	4.57587	4.4385	4.27853
578.97	9.53389	11.2537	0	18.3966	15.6551	23.1631	27.7955	33.2067	40.3051	38.9292	36.3071	38.183	40.0795	44.0657	42.8325	29.3401	20.2282	0	0	4.70437	3.8545	3.61847	3.7919	3.41647	4.08453	4.54161	4.68869	4.92686	5.01169	5.1843	5.45169	5.42495	5.84364	6.1883	6.62947	6.75066	7.01486	7.45186	7.07117	6.71064	6.58073	6.52637	6.03305	5.47985	5.2041	4.8045	4.47148	4.2564	4.02031
580	12.6396	15.4654	0	20.4691	14.7735	21.7636	27.3991	32.7002	40.0285	38.7859	35.6404	37.6572	40.0213	43.3783	43.0607	29.7281	21.5782	0	0	3.85317	3.62495	3.35592	3.4468	3.47127	3.99994	4.47946	4.24197	4.42222	4.84133	5.00552	5.39457	5.34053	5.76106	5.92881	6.44264	6.78452	6.78119	7.06719	6.89725	6.62643	6.5575	6.29865	5.72977	5.38219	5.09074	4.62915	4.24808	4.14269	3.94151
581.02	12.6267	17.2751	3.19739	18.4514	17.5606	25.1007	26.9154	32.5944	39.5016	38.2963	35.09	36.9134	39.5571	42.7466	42.4934	30.5322	22.6436	0	0	1.95049	3.59836	3.26477	3.25789	3.50816	4.18631	4.2528	3.93906	4.4008	4.71744	4.97507	5.31865	5.27114	5.60012	5.7484	6.11422	6.61271	6.65187	6.77491	6.73333	6.53656	6.51178	6.08397	5.51858	5.32251	5.02507	4.51375	4.0784	4.05866	3.87418
582.05	11.9546	15.4016	10.4721	13.7217	16.0344	24.9034	27.4629	32.6414	38.2342	37.124	33.9895	35.9355	38.7737	41.3522	42.0335	31.5021	23.2509	3.66159	0	0	3.62416	3.28655	3.27122	3.2836	3.9078	3.65761	4.06889	4.65893	4.54808	4.80249	4.8829	5.27058	5.3921	5.53923	5.82494	6.29726	6.31384	6.62895	6.5312	6.42418	6.37144	5.92588	5.43846	5.17749	4.82004	4.37793	3.97418	3.91558	3.73321
582.94	15.8234	15.8961	9.37336	5.20006	18.2397	22.9224	28.4866	32.4437	36.6994	35.9627	33.4185	35.2266	37.5532	40.1305	41.8144	32.1735	23.3679	8.42349	0	0	3.41904	3.15854	3.2332	3.20893	3.59008	3.4159	4.25756	4.64174	4.2935	4.64298	4.78661	5.13846	5.34273	5.51403	5.83922	5.94317	6.14883	6.70053	6.33377	6.14657	6.13879	5.79296	5.345	5.08455	4.7127	4.21333	3.89989	3.83707	3.69385
583.97	6.29513	9.08594	12.7199	6.48833	14.8	21.3068	27.413	31.1302	35.0786	35.0747	33.1886	33.6418	36.3215	38.8084	42.0136	32.0797	23.8385	11.0723	0	0	3.15966	3.09117	2.96495	3.18879	3.38893	3.38661	4.124	4.03094	4.43349	4.55074	4.65871	5.19646	5.22105	5.35366	5.90185	6.03178	6.06605	6.31837	6.15262	5.82189	5.94257	5.53807	5.23463	5.05713	4.72124	4.1165	3.87287	3.77189	3.67351
585	7.50589	15.8876	8.20091	7.06517	15.3273	23.421	25.8414	29.6444	33.5333	34.0433	31.8944	32.1918	35.0271	37.7295	41.6503	31.739	24.0876	12.3076	0	0	3.1032	2.98589	2.98075	3.29924	3.60947	3.73673	3.83944	3.53447	4.5155	4.237	4.54765	5.03113	5.1492	5.04067	5.74964	6.01258	6.06714	5.98746	5.93559	5.61826	5.87614	5.4063	5.07967	4.93703	4.67996	3.99862	3.83582	3.7171	3.58895
586.02	4.05029	10.8078	10.587	11.5769	16.0001	24.0572	24.8944	28.7432	31.4263	32.5277	30.0772	30.8994	33.9212	36.7962	41.3573	32.5232	24.7394	12.676	0	0	3.1583	2.86227	2.98564	3.14993	3.79413	3.65524	3.67069	3.44392	4.06772	4.02386	4.38044	4.73353	4.84795	4.88606	5.33073	5.87692	5.88462	5.84313	5.73478	5.72676	5.71365	5.41385	5.00597	4.6838	4.37535	3.93306	3.68055	3.60172	3.41287
587.05	3.70392	6.58773	12.3426	4.83878	13.2804	20.2921	25.0506	28.3563	31.5583	31.5333	28.9089	30.7172	32.698	35.7997	40.8975	33.0011	25.1481	13.1557	0	0	2.99231	2.8845	2.89659	3.14092	3.5891	3.49733	3.75174	3.59995	3.93331	4.10358	4.35526	4.41202	4.73819	4.77167	5.14674	5.58374	5.7093	5.95978	5.57081	5.75836	5.43649	5.1707	4.81397	4.41777	4.17485	3.75282	3.49994	3.4504	3.2778
587.94	9.13234	5.47343	16.8598	9.14777	10.2936	19.4444	24.909	26.474	31.7296	30.2751	28.4891	29.9704	31.6006	34.8779	40.2183	33.5694	25.2565	13.1268	0	0	2.50243	2.68491	2.73964	3.21502	3.42434	3.22674	3.4731	3.67034	3.99581	3.88843	4.20944	4.33904	4.46236	4.69776	5.11119	5.47645	5.4228	5.79371	5.35367	5.51584	5.10701	4.94535	4.64747	4.33826	4.04201	3.71982	3.42795	3.33548	3.24404
588.97	13.8343	13.4645	15.1866	8.29099	10.9316	21.4937	24.0703	25.1735	31.0462	29.2608	27.1919	29.4815	30.7889	33.7546	39.3079	33.09	25.213	13.0775	0	0	2.10889	2.5265	2.61311	3.03588	3.16573	3.57233	3.07851	3.633	3.9996	3.70972	4.02279	4.22418	4.34698	4.59944	5.09767	5.17005	5.30008	5.50128	5.26832	5.24503	4.94962	4.81437	4.47458	4.24309	4.00597	3.60531	3.39724	3.21624	3.18311
590	10.4938	14.8401	11.9481	13.5084	12.2621	25.0277	23.0737	24.9218	28.8436	28.1638	25.9684	28.7375	29.8565	32.735	38.1796	33.6468	25.4026	12.9973	0	0	1.45444	2.3573	2.46878	2.67633	3.24364	3.2811	2.93233	3.4842	3.74669	3.73522	4.03818	4.14536	4.22324	4.52829	4.77231	5.1321	5.23158	5.40097	5.23613	5.05456	4.93014	4.60619	4.41296	4.25498	3.90963	3.51528	3.34552	3.17288	3.11554
591.02	3.57412	13.197	3.08062	13.1053	11.0938	24.3416	22.9456	24.3947	28.4413	27.4271	25.5263	27.9468	29.495	32.2813	37.7383	33.3707	25.6208	12.9028	0	0	0	2.46649	2.49174	2.28634	3.12206	3.02323	2.99554	3.52161	3.6762	3.89764	3.80889	4.04563	4.34917	4.17127	4.63726	5.01976	5.1114	5.16915	5.09345	4.90433	4.92237	4.46371	4.2797	4.13761	3.80948	3.34284	3.28106	3.06356	2.97768
592.05	7.01789	12.5271	0	7.29391	12.5618	23.0519	23.2006	23.9273	27.9125	26.9237	25.013	26.9695	28.4311	32.3358	37.2766	33.8658	25.9219	13.1178	0	0	0	2.31574	2.60537	2.09272	2.99793	2.73355	3.1766	3.29254	3.49562	3.46412	3.68253	3.93673	4.26063	3.99254	4.7195	4.75297	4.87179	5.08375	4.90524	4.81495	4.84774	4.35086	4.11747	4.10989	3.79553	3.3197	3.23523	3.03452	2.84644
592.94	6.70214	8.02734	6.13032	2.74368	15.1239	20.4297	23.7204	22.6289	26.4608	26.3756	24.3581	25.9185	27.458	31.9027	36.7591	33.5727	26.1443	13.1897	2.00485	0	0	2.13687	2.43934	2.05225	2.84617	2.69199	3.01291	3.16521	3.26061	3.26005	3.46752	3.96069	4.1632	3.94556	4.6241	4.40117	4.67616	4.82867	4.89826	4.75302	4.62907	4.30956	3.97075	4.02077	3.64929	3.25397	3.0743	3.0231	2.78624
593.97	6.30631	0	6.49692	3.00139	9.51479	19.8344	23.0712	21.5849	25.4361	25.7775	23.903	25.209	26.3172	30.432	35.9963	34.1318	26.301	13.2048	3.72369	0	0	1.92932	2.31355	2.53142	2.57863	2.64297	2.81671	2.92684	3.27129	3.321	3.42332	3.88005	3.84777	4.08648	4.35027	4.38026	4.68106	4.67118	4.79656	4.53576	4.29309	4.14358	3.83343	3.87964	3.50277	3.19497	2.96758	2.95801	2.7605
595	0	3.468	5.50934	8.21754	6.17607	20.3935	22.6524	21.3078	25.2328	25.2205	23.5077	24.9638	26.0942	29.7448	35.5084	33.7695	26.4968	13.1582	4.20929	0	0	1.88644	2.15705	2.71729	2.40739	2.80687	2.66079	2.8732	3.02935	3.27053	3.18951	3.64607	3.74395	4.02403	4.16417	4.3364	4.43643	4.50993	4.53822	4.44768	4.14591	3.99434	3.64263	3.69381	3.37452	3.09263	2.8425	2.78295	2.78618
596.02	0	9.81035	2.19821	4.60673	6.47376	21.7508	21.5894	22.3883	24.2711	24.8703	22.8108	24.6059	25.5022	28.6055	35.4997	33.8155	26.8189	13.0593	4.70284	0	0	1.70321	1.9403	2.39014	2.4476	2.8065	2.77075	2.9392	3.08735	3.02925	3.16621	3.42718	3.62465	3.88522	4.04189	4.21634	4.257	4.46342	4.42622	4.31073	4.11416	3.82317	3.55367	3.62018	3.407	3.03818	2.78505	2.68559	2.62011
597.05	8.87402	0	3.80462	7.84932	8.91148	22.2729	21.6429	21.9705	23.8543	23.8923	21.8252	23.5537	25.2226	27.8826	35.2905	33.1903	26.8661	12.7449	4.7596	0	0	1.31978	1.74188	2.04418	2.67597	2.43363	2.91495	2.90184	2.98639	2.94031	2.99813	3.4861	3.61761	3.64092	3.82289	4.11102	4.14486	4.28516	4.45437	4.18626	3.98789	3.80895	3.63279	3.44808	3.31734	2.93285	2.68526	2.60796	2.49629
597.94	3.90184	0	0	7.48408	8.9639	21.1807	21.6358	20.7085	23.5115	22.8146	20.8205	22.3697	24.8824	26.7679	34.637	33.3706	26.7123	12.5373	4.91078	0	0	1.10873	1.5348	1.98234	2.54755	2.40311	2.86645	2.81857	2.95841	2.85803	2.89545	3.34228	3.35464	3.40619	3.8599	3.98303	4.19833	4.07065	4.34691	3.97241	3.84551	3.65578	3.51422	3.30158	3.1597	2.86204	2.65063	2.47156	2.3576
598.97	3.86007	3.73292	3.48502	9.0888	10.2094	19.4957	21.2287	20.8261	22.6199	22.0858	19.9818	21.199	23.7765	26.6141	34.0746	33.7473	26.734	12.9294	4.72356	0	0	0.782099	1.59068	2.02216	2.30445	2.1924	2.57807	2.89468	2.74989	2.91836	2.90858	2.92313	3.32472	3.37463	3.85083	3.8041	4.08422	3.99487	4.21633	3.81484	3.76918	3.52927	3.36566	3.21197	3.00768	2.77572	2.57548	2.34074	2.41647
600	7.0873	8.21917	6.08255	11.6482	8.0205	19.1738	20.2478	20.5027	21.2743	21.6933	19.9257	20.2284	22.9447	26.0903	33.5692	33.6778	26.5599	13.0763	4.90772	0	0	0.299959	1.80097	1.84232	2.1533	2.24108	2.28465	3.18572	2.55572	2.84267	3.0088	2.74266	3.20721	3.23808	3.62856	3.73416	3.9877	3.68153	4.01872	3.77276	3.87553	3.53723	3.2439	3.1877	2.90354	2.69764	2.51651	2.38226	2.4076
601.02	11.8031	0	9.45886	11.7257	6.17147	20.4298	20.1145	18.5517	21.1633	20.8451	19.4835	19.573	22.1522	25.7196	32.9392	32.784	26.2636	13.0735	4.64964	0	0	0	2.02548	1.9481	2.11437	2.23627	2.23779	2.91592	2.38529	2.90644	2.94166	2.86926	3.00012	3.27525	3.4216	3.7315	3.89823	3.48717	3.87029	3.72443	3.75468	3.53166	3.18976	3.0363	2.78465	2.5998	2.34439	2.36384	2.31021
602.05	5.99589	0	8.16748	7.30577	7.22603	19.6294	19.5906	16.9408	20.995	20.2102	18.8874	19.468	21.6602	24.904	32.4014	32.1028	26.3347	12.7723	4.64869	0	0	0	1.79551	1.92695	2.16252	2.34833	2.2468	2.48821	2.3045	2.80856	2.6985	2.92982	2.77777	3.28718	3.31697	3.58171	3.68061	3.48325	3.72664	3.50215	3.60574	3.37252	3.08691	2.97772	2.69458	2.50964	2.27466	2.23852	2.18164
602.94	2.91482	1.99916	11.301	5.09238	7.78643	18.2978	19.371	17.572	20.3712	19.3898	17.8277	18.9416	20.6917	23.6349	32.0177	31.6976	26.2237	12.4569	4.59241	0	0	0	1.69959	1.74328	2.09471	2.18191	2.01307	2.16155	2.50132	2.62013	2.58769	2.74541	2.82542	3.25162	3.32311	3.44481	3.52422	3.68342	3.69999	3.32716	3.40418	3.23167	2.94784	2.89407	2.65782	2.43656	2.25699	2.13826	2.07259
603.97	1.23678	2.03662	13.0774	8.80842	7.31291	17.5448	18.8441	18.2473	19.1165	18.631	17.1798	18.2408	19.9523	22.9858	31.8541	31.2112	25.5663	12.1522	4.7466	0.96562	0	0	1.51723	1.55301	2.12378	2.19751	2.0862	2.1843	2.67511	2.60685	2.7087	2.76231	2.96454	2.94359	3.25794	3.31986	3.32433	3.55913	3.64607	3.39833	3.26615	3.14401	2.87149	2.80944	2.61757	2.35817	2.28666	2.09055	2.03484
605	8.13357	0	13.8184	5.92682	5.67368	17.2887	18.3779	17.8075	18.8097	17.6144	16.4399	17.3948	19.5146	22.4785	31.0916	31.0795	25.2059	12.209	4.4317	1.59405	0	0	1.37965	1.507	1.85919	2.1156	2.12423	2.36895	2.62729	2.70498	2.80837	2.63529	3.04312	2.91033	3.09851	3.22922	3.34736	3.47394	3.47015	3.47417	3.13298	3.01567	2.68796	2.7496	2.52663	2.31093	2.15145	2.06254	2.02136
606.02	9.1594	0	10.3534	4.34899	7.05416	16.8846	17.3431	16.8605	18.4632	17.0162	15.9342	16.9677	18.7931	21.9342	30.6265	31.0752	24.5439	12.6211	4.26828	1.82706	0	0	1.00441	1.77172	1.60403	2.04266	2.08004	2.41878	2.50272	2.64755	2.53936	2.58125	2.79028	2.77206	2.93362	2.95228	3.27726	3.22761	3.30774	3.29448	3.17414	2.98464	2.61303	2.6049	2.39135	2.26637	2.11786	2.03928	1.94989
607.05	12.1378	4.91648	0	0	6.64741	17.8007	17.5145	15.7572	18.0691	16.4157	15.6177	16.7127	18.1463	20.8144	29.8144	30.988	23.8848	12.7184	4.21139	1.94678	0	0	0.931058	1.66428	1.45909	2.02583	1.98414	2.19671	2.10004	2.41101	2.21008	2.51514	2.50848	2.82507	2.90178	2.89748	2.99922	3.14347	3.19854	3.19834	3.01593	2.98529	2.59075	2.48689	2.29613	2.23269	1.9789	2.02999	1.82649
607.94	12.4898	4.73682	0	0	5.7893	17.8804	17.2633	15.4276	16.8693	16.2795	14.9994	16.3852	17.1479	20.2852	29.1335	30.6354	23.531	12.4712	4.31496	2.03446	0	0	0.950782	1.58406	1.64161	2.18798	1.86338	1.97313	2.14769	2.31852	2.17039	2.63132	2.48559	2.72484	2.85892	2.83356	2.88028	3.0631	3.17155	3.20794	2.87452	2.92744	2.61054	2.37208	2.22518	2.16228	1.96575	1.99989	1.80376
608.97	19.0188	0.756391	5.78605	4.71822	0.173417	16.5853	16.4441	16.0086	15.79	16.0366	14.6441	15.7795	16.8349	19.1941	28.2151	29.757	24.2481	12.2353	4.27794	1.9893	0	0	0.906757	1.28839	1.63481	2.10128	1.76948	2.20884	1.99806	2.28364	2.33409	2.24163	2.73004	2.58808	2.74562	2.86863	2.94098	3.05647	3.11541	3.04168	2.82253	2.82344	2.54974	2.3234	2.19252	2.07238	1.8819	1.88031	1.81171
610	14.8803	0	5.00915	7.05252	0	15.452	15.6366	15.3877	14.994	15.1307	13.6859	14.9132	15.9063	18.5521	27.7001	29.1427	23.8541	11.9332	3.94597	1.96758	0	0	0.327072	1.30509	1.64719	2.09724	1.60105	2.06975	2.01177	2.15177	2.28154	2.11886	2.69982	2.32349	2.76942	2.66228	3.04132	2.87791	2.9554	2.89948	2.92509	2.61209	2.48205	2.29677	2.16657	2.03045	1.90016	1.81456	1.73981
611.02	4.20931	0	5.96224	8.44362	1.95165	16.1674	16.2286	14.0421	14.4603	13.8658	12.9089	14.0985	15.5485	18.1154	27.0808	28.8302	23.4086	11.5462	3.85922	1.88085	0	0	0	1.13009	1.55855	1.6755	1.59004	1.72365	2.04871	2.11702	2.32079	2.2437	2.53417	2.27268	2.87377	2.50342	2.85905	2.94897	2.85656	2.78537	2.6929	2.50126	2.4671	2.33464	2.1818	1.99567	1.73303	1.7462	1.68581
612.05	0	0	7.99161	6.54918	2.27339	15.6159	16.4367	13.2531	14.2393	13.189	12.402	12.9048	14.9416	18.0422	26.5776	28.498	23.074	11.1382	3.80955	1.95393	0	0	0	1.1237	1.49081	1.60754	1.57615	1.51862	2.25952	2.0893	2.20288	2.40021	2.2994	2.42959	2.84453	2.47543	2.76338	2.89817	2.68229	2.77301	2.54828	2.37281	2.32495	2.31111	2.12946	1.91647	1.73465	1.69038	1.76897
612.94	0	0	4.11199	7.2962	4.23167	12.8593	15.7422	13.9125	13.648	13.3795	12.2278	12.7634	14.7534	17.6785	25.5878	27.4208	23.0256	11.0055	3.85952	2.11834	0	0	0	1.20743	1.43278	1.47827	1.77645	1.81308	2.14312	1.89751	2.0663	2.21397	2.17767	2.39048	2.6039	2.74628	2.55871	2.71999	2.61157	2.56997	2.42774	2.28929	2.17912	2.14034	2.00541	1.82633	1.68566	1.61433	1.72477
613.97	0	2.11946	0	2.70064	9.54807	12.9992	15.1254	13.2823	13.3624	13.3245	11.9459	12.6706	13.9772	17.0517	25.3525	26.864	22.1184	10.6898	3.71635	2.09385	0	0	0	1.24562	1.48396	1.79562	1.72952	1.67915	1.84543	1.69836	1.93928	2.02426	2.18386	2.27927	2.43094	2.73399	2.51227	2.50839	2.5523	2.43006	2.37643	2.2853	2.12536	2.10434	1.91638	1.7923	1.66792	1.54909	1.62473
615	0	7.34604	0	4.12378	5.73549	14.2523	15.1448	12.6191	12.9323	12.7812	11.5392	12.5175	13.449	16.2695	24.8725	26.3921	20.9653	10.5183	3.70754	1.98002	0.827314	0	0	1.11363	1.44391	1.72034	1.51817	1.44622	1.81963	1.78234	2.006	2.06911	2.17181	2.07392	2.21867	2.5401	2.38897	2.54843	2.45084	2.32499	2.29723	2.26014	2.06773	2.06639	1.91882	1.72698	1.59992	1.52593	1.51044
616.02	8.09793	7.39278	0	4.57634	5.41422	16.0913	15.2025	12.0946	12.531	11.8438	11.3862	11.6208	13.0011	15.6339	24.3305	26.0807	20.3826	10.2707	3.72739	1.8796	0.905621	0	0	0.945583	1.3072	1.72906	1.4826	1.40533	1.79281	1.85172	1.93918	1.85983	2.17493	2.15188	2.13452	2.2979	2.36305	2.40034	2.2922	2.38226	2.28891	2.23975	2.04058	2.08186	1.86437	1.71553	1.5327	1.4719	1.49805
617.05	6.21528	7.23526	0	6.46999	4.0594	15.02	13.9167	12.3982	11.8597	11.3262	10.8908	11.3201	12.9124	15.3049	23.5196	25.5476	20.2917	9.93805	3.59709	1.93545	1.08226	0	0	0.682205	1.14328	1.60009	1.48181	1.61113	1.71148	1.8377	1.70203	1.70784	2.12293	2.04216	1.96984	2.27963	2.19419	2.35883	2.24389	2.34221	2.14841	2.13671	2.04527	1.95219	1.77402	1.73391	1.43324	1.40667	1.4089
617.94	2.67863	2.16541	0	2.50837	7.465	14.5369	12.5283	11.2745	11.2792	11.1342	10.5942	10.8985	12.5128	15.1713	23.1093	25.2717	20.0519	9.67899	3.34498	1.73918	1.09734	0	0	0.42046	0.827477	1.49255	1.44073	1.73042	1.49498	1.69181	1.658	1.55651	1.98255	1.98639	2.04728	2.07418	2.14302	2.24525	2.2614	2.30495	2.0827	2.0913	1.95296	1.80339	1.68825	1.70479	1.39812	1.34438	1.34303
618.97	0	2.89819	5.0352	4.77034	7.7603	12.7374	12.3565	10.2689	11.3113	11.0596	10.1977	10.4578	12.0543	14.7933	22.7286	24.5779	19.3606	9.72162	3.32039	1.67071	1.21301	0	0	0.0437811	0.809812	1.3973	1.33009	1.46701	1.41895	1.79772	1.83544	1.55534	1.65274	1.82988	2.0959	1.98916	1.92621	2.2719	2.17205	2.21055	2.04254	1.93805	1.89852	1.72693	1.64999	1.50922	1.38979	1.42541	1.28419
620	3.1736	10.0326	8.20618	2.08061	6.10273	12.3725	12.9724	9.26154	10.8111	10.5521	9.72834	10.4182	11.622	14.1847	21.9656	23.6726	18.7669	9.75583	3.35755	1.69385	1.05354	0	0	0	0.864222	1.38679	1.40862	1.46959	1.45962	1.79687	1.95285	1.55546	1.56387	1.81002	2.1824	2.01306	1.97122	2.11707	2.13581	2.08787	2.07645	1.86495	1.86789	1.71264	1.60407	1.38572	1.39415	1.3917	1.27822
621.02	9.1236	9.48454	8.923	0	5.93623	11.7802	12.6689	9.86186	10.2358	10.0203	9.19136	10.5537	11.1009	13.3723	21.1988	23.0319	18.4429	9.25385	3.24444	1.74121	1.07621	0	0	0	1.08753	1.44671	1.15456	1.3162	1.47178	1.70055	1.71024	1.6223	1.58324	1.65974	2.04505	2.1469	2.00529	2.05544	2.15116	1.80338	1.99809	1.80469	1.82136	1.68408	1.59711	1.39383	1.30891	1.28927	1.25927
622.05	3.52453	0	0	0	6.69972	12.5252	12.1892	10.3914	10.0638	9.83603	9.06551	10.2516	10.6373	13.2583	20.6324	22.7795	17.7447	8.89787	2.96144	1.65421	0.906689	0	0	0	0.955097	1.26164	1.04206	1.42096	1.46556	1.61759	1.64261	1.70794	1.59305	1.62586	1.69814	2.06778	1.95947	1.92811	2.07663	1.76646	1.95378	1.7795	1.66389	1.59654	1.56249	1.3916	1.30951	1.24428	1.2735
622.94	2.71104	0	1.44106	3.22435	7.42518	12.2413	12.0339	10.508	10.4909	9.49823	8.94462	9.52825	10.3959	12.8562	19.6696	22.1209	16.9812	8.52123	2.9788	1.71137	0.963483	0	0	0	0.843619	0.93262	1.09636	1.33372	1.45816	1.38154	1.67251	1.63326	1.44996	1.58854	1.62035	1.89764	1.90823	1.97174	1.84151	1.82816	1.9759	1.7859	1.65864	1.6471	1.51527	1.33574	1.24148	1.26671	1.19418
623.97	6.32032	4.67826	6.29382	4.4232	5.19158	12.7546	11.8573	10.2865	9.90481	8.92957	8.6145	8.95652	10.0114	12.1767	19.459	21.7048	16.5135	8.47268	3.10868	1.77789	0.921356	0	0	0	0.580048	0.810891	1.16539	1.51769	1.64248	1.39373	1.68238	1.51307	1.51602	1.70958	1.59418	1.73534	1.82222	1.95632	1.81511	1.96084	1.83267	1.6927	1.57277	1.62442	1.45208	1.30393	1.2688	1.16674	1.1984
625	5.79702	6.63898	4.79125	4.94243	4.6569	11.5185	10.8925	8.69201	8.76841	8.58251	8.26675	8.39364	9.48749	11.3319	18.8769	21.2234	16.3032	8.09642	3.13959	1.76563	0.89518	0.0389265	0	0	0.758975	0.780396	1.08516	1.30435	1.36457	1.17427	1.39665	1.36599	1.42157	1.7037	1.63232	1.65067	1.87553	1.77722	1.90126	1.8771	1.7701	1.59152	1.50273	1.45561	1.42647	1.28666	1.14163	1.08241	1.20106
626.02	1.13044	0.728483	1.70186	4.08344	5.13691	11.65	10.0119	8.03294	8.23817	8.49391	7.86899	8.20595	9.11063	11.1237	18.5168	20.6472	15.9496	7.85751	2.87617	1.51161	0.766569	0.156012	0	0	0.7862	0.904057	1.06711	1.11429	1.12231	1.29569	1.34477	1.35116	1.40408	1.56351	1.59907	1.65087	1.78449	1.70583	1.7713	1.85081	1.70795	1.47256	1.44241	1.34671	1.37224	1.20228	1.09298	1.0284	1.16771
627.05	0	0	1.36085	3.31341	4.93439	9.63452	9.66512	8.13068	8.34879	8.11675	7.72938	8.20242	8.80915	11.0204	17.4331	19.8133	15.5456	7.49428	2.61132	1.31055	0.869405	0.354634	0	0	0.624287	1.00105	1.1504	0.921151	0.969491	1.20262	1.29354	1.41654	1.46536	1.45356	1.67082	1.64423	1.75685	1.65665	1.57736	1.69898	1.75883	1.4936	1.43062	1.36793	1.33832	1.13591	1.02014	0.986611	1.06822
627.94	0	0	0	2.40486	1.93174	9.03803	10.1266	8.904	7.96519	7.7206	7.20976	7.84422	8.5793	10.7569	16.8588	19.4891	15.3502	7.5248	2.32393	1.38758	0.790056	0.566543	0	0	0.501694	1.10403	1.00924	1.10416	1.30334	1.22155	1.35578	1.26028	1.5587	1.44302	1.60427	1.6523	1.65561	1.69594	1.57017	1.67287	1.62828	1.52607	1.41614	1.38144	1.32552	1.12683	0.992053	1.02499	0.986458
628.97	6.46482	0	0	3.37961	0	8.49895	9.94395	7.70076	7.8027	7.60865	6.87539	7.42751	8.40082	10.3006	16.0809	18.8005	15.1577	7.2636	2.59516	1.5499	0.769205	0.556392	0	0	0.280809	0.865602	0.991588	1.00753	1.2301	1.16726	1.16812	1.33768	1.39765	1.38415	1.54527	1.46091	1.66846	1.67184	1.67962	1.60028	1.60822	1.53366	1.39994	1.35928	1.27983	1.09034	0.942679	1.04841	0.950459
630	0	0	0	1.37386	0	9.08537	9.16686	7.51303	7.66797	7.18098	6.73072	7.21453	8.11814	10.1558	15.672	18.21	14.9298	7.00731	2.819	1.47841	0.810621	0.619599	0	0	0	0.613153	0.944971	0.899688	1.14595	1.18291	0.955023	1.29414	1.27774	1.32845	1.49081	1.41302	1.6307	1.64942	1.61394	1.69748	1.49387	1.43481	1.29442	1.31654	1.1558	1.08833	0.977547	1.04165	0.91221
631.01	0	0	0	2.11067	0	8.23272	8.05755	7.17873	6.98989	6.80469	6.69552	7.0603	7.85154	9.8625	15.1867	17.4952	14.4588	6.72681	2.75247	1.30815	0.85349	0.606918	0	0	0	0.58177	1.20896	0.795253	0.914837	1.14393	0.848094	1.31712	1.29475	1.33078	1.4854	1.36307	1.62445	1.59894	1.49642	1.53063	1.46597	1.3575	1.27145	1.29969	1.12071	1.06535	1.0049	0.980575	0.913094
632.02	1.58632	0	0	2.37589	0	9.83945	8.42034	7.28359	6.42974	6.55217	6.50487	6.96733	7.49064	9.46414	14.9754	16.9581	13.7999	6.70154	2.35392	1.30124	0.822678	0.843836	0	0	0	0.519035	1.20987	1.00878	0.86067	1.03	0.912205	1.04156	1.22255	1.18403	1.26081	1.339	1.63052	1.4328	1.47905	1.40636	1.39546	1.35686	1.3167	1.23576	1.13484	0.994987	0.938759	0.941464	0.858998
633.04	6.91889	0	2.33616	4.02471	0	9.61933	8.65002	6.55699	6.49347	6.61567	6.26644	6.58729	7.08936	8.79874	14.7321	16.3019	13.5075	6.19944	2.19561	1.32321	0.729085	0.786551	0	0	0	0.490609	0.934976	0.973454	0.832368	1.15784	0.890221	1.00636	1.20692	1.1456	1.13284	1.30329	1.45142	1.38519	1.38562	1.28864	1.4019	1.28029	1.2937	1.21192	1.13695	0.912217	0.868483	0.834797	0.804006
634.05	4.28198	0	0	2.93353	0.206042	7.37711	8.8053	6.6337	6.50431	6.41376	5.98498	5.70904	6.88029	8.38074	14.6655	16.0004	13.1754	5.91624	2.154	1.31821	0.788878	0.734594	0	0	0	0.503758	0.60911	0.878514	1.06685	0.969742	0.938288	1.05606	1.1228	1.04147	1.17095	1.35312	1.17575	1.27801	1.38043	1.40688	1.34775	1.18292	1.20105	1.08307	1.0609	0.924955	0.855493	0.80114	0.791914
635.07	3.74438	4.44489	2.42466	7.2832	0.706551	5.81946	8.04496	6.92459	5.7306	5.93944	5.80628	5.38193	6.5567	8.19113	14.1502	15.6939	13.1539	5.64073	2.03577	1.12407	0.654811	0.552754	0	0	0	0.607151	0.5193	0.71199	0.993148	0.828656	0.883802	1.13746	1.06137	1.07792	1.1932	1.28055	1.09794	1.42892	1.28458	1.2863	1.3491	1.15612	1.18832	1.05115	1.05014	0.933201	0.882331	0.768761	0.780384
635.94	6.58892	2.28417	0	1.73745	1.02381	5.88121	7.26374	6.75148	5.8195	5.39371	5.48066	5.27548	6.27444	8.06556	13.589	15.3211	12.6927	5.70823	2.10533	1.11449	0.755304	0.514369	0.0775984	0	0	0.545731	0.730528	0.742162	0.840547	0.808043	0.927332	1.09832	0.933591	1.04573	1.09599	1.124	1.14541	1.3944	1.34528	1.28801	1.19024	1.1049	1.06217	0.961461	1.02965	0.913149	0.870547	0.785973	0.811198
636.95	4.44595	0	0	0	2.19864	6.74706	7.64886	6.25491	5.64358	5.14928	5.26149	5.1847	5.94326	7.81432	13.0076	14.9424	12.095	5.47478	2.15081	1.28173	0.570171	0.473127	0.0277585	0	0	0.427244	0.730727	0.746256	0.809393	0.972435	0.828628	1.06141	0.97867	1.12947	1.06254	1.12996	1.2015	1.36393	1.22717	1.32203	1.17303	1.05498	1.00567	0.974081	0.970896	0.896676	0.861031	0.728212	0.722311
637.97	2.85911	0	0	0	3.863	7.13396	7.66238	5.49735	5.64205	5.17868	4.87626	4.91896	5.97721	7.26489	12.579	14.0755	11.5008	5.48555	2.03624	1.40533	0.718791	0.594128	0.148494	0	0	0.160944	0.751386	0.841821	0.953976	0.801846	0.879372	1.11611	0.885813	1.04539	1.07355	1.19653	1.08752	1.16888	1.24184	1.29629	1.15565	1.00178	0.99169	0.958222	0.903101	0.87118	0.781773	0.728309	0.704452
638.98	0	0	0.641158	0	2.90467	7.85177	6.98708	5.4494	5.12161	5.32739	4.79498	5.30916	5.6967	7.03641	11.8922	13.3743	11.1646	5.24377	1.74879	1.26371	0.828836	0.564997	0.229317	0	0	0	0.909206	0.597754	0.813785	0.768326	0.909471	1.07684	0.896179	0.990929	1.09734	1.09125	1.05558	1.13931	1.19698	1.12784	1.17972	1.08763	1.01581	0.920042	0.863262	0.860598	0.738276	0.67556	0.633371
640	0	0	6.85716	0.220632	2.70052	6.48498	6.10555	5.03088	5.04324	5.38925	4.50357	4.83683	5.46783	6.72951	11.4992	12.9876	10.9116	5.1874	1.51892	1.23119	0.986406	0.437512	0.35273	0	0	0	1.12363	0.6472	0.613723	0.727957	0.90189	0.897605	0.79309	0.835926	1.1184	0.984757	1.05426	1.01631	1.15887	1.05465	0.973192	1.03257	0.90675	0.892939	0.865706	0.753995	0.660553	0.682112	0.62722
641.01	0	0	7.10598	0	3.66755	6.41508	6.8281	5.83308	5.05787	5.09814	4.52819	4.7239	5.34358	6.46294	11.3129	12.8401	10.3266	5.01434	1.3554	1.06791	0.70555	0.316741	0.401282	0	0	0	0.817959	0.560718	0.616402	0.79758	0.873553	0.869284	0.807518	0.861399	1.08841	0.955179	1.03221	0.893067	1.05245	1.13845	0.931448	0.990986	0.879634	0.917423	0.840445	0.730232	0.69285	0.612814	0.570641
642.02	0	0	0	5.99036	4.88741	7.3398	6.79163	5.56615	5.26791	4.57645	4.38128	4.69859	5.44605	6.21422	10.9491	12.631	10.0795	4.95956	1.32062	1.00099	0.835783	0.486742	0.48882	0	0	0	0.57626	0.684332	0.744765	0.676933	0.798613	0.925951	0.89003	0.832747	0.93042	1.01553	0.824664	0.874368	0.968249	1.14848	0.969156	0.949676	0.857628	0.923567	0.82299	0.728668	0.676419	0.664964	0.62983
643.04	0	0	9.22703	6.60414	0.427996	7.23765	6.35552	5.35627	4.76515	4.29545	4.24575	4.60324	5.16093	6.0833	10.2587	12.0922	9.55829	4.70366	1.37894	1.00819	1.05575	0.49532	0.408248	0	0	0	0.617705	0.592766	0.667785	0.750482	0.813352	0.967785	0.944446	0.947391	0.846802	0.978002	0.735662	0.950768	0.897193	1.07263	1.02932	0.946862	0.837748	0.861127	0.811411	0.761938	0.66185	0.627062	0.636878
644.05	0	0	7.53409	4.06421	0	6.15027	5.49887	4.38792	4.60098	4.07902	3.6294	4.18601	4.66174	5.79746	9.83213	11.4921	9.23508	4.51998	1.3088	1.15741	1.04135	0.675427	0.190152	0	0	0	0.636111	0.796212	0.558257	0.755752	0.778118	0.770511	0.867502	0.876447	0.946946	0.919288	0.777626	1.01713	0.902868	0.917384	1.02597	0.939832	0.775495	0.835537	0.819084	0.675533	0.542915	0.635607	0.641417
645.07	2.08853	0	3.65251	0	0.590558	5.99246	4.87476	4.74889	4.54283	3.8361	3.6499	4.13485	4.26235	5.42979	9.3546	10.7767	8.64495	4.39019	1.2923	1.02613	0.683231	0.535419	0.232914	0	0	0	0.356741	0.571756	0.480695	0.758737	0.976787	0.708551	0.787131	0.963121	1.02328	0.825596	0.762433	1.0754	0.854347	0.904486	0.939077	0.894	0.802055	0.836121	0.781297	0.652269	0.552222	0.626513	0.606255
645.94	2.70865	0	0	0	3.94828	6.81557	4.54424	4.29179	4.62908	3.73791	3.62206	3.98141	4.17045	5.26477	9.0437	10.5428	8.44243	4.24809	1.2143	0.937914	0.617702	0.367101	0.255243	0	0	0	0.136225	0.405562	0.508516	0.715025	0.88362	0.723862	0.750867	0.873171	0.932525	0.834399	0.659047	1.12406	0.925706	0.885529	0.917734	0.884783	0.809461	0.758301	0.682086	0.695474	0.641895	0.595279	0.562048
646.95	4.20507	0	0	1.37325	0.402596	6.72929	4.65435	3.9578	4.53575	3.80732	3.56088	3.40881	4.08137	5.08387	8.75818	10.5079	8.14691	4.38486	1.24219	0.846365	0.747908	0.133142	0.407687	0	0	0	0	0.212816	0.361345	0.716157	0.658979	0.707444	0.791094	0.801332	0.666238	0.773537	0.684484	0.989063	0.819821	0.865568	0.799837	0.873149	0.809656	0.682359	0.634506	0.662173	0.671899	0.486981	0.503332
647.97	0	0	2.27654	0	0	4.39427	4.66044	3.772	4.30581	3.82361	3.28417	3.44305	3.87684	5.03838	8.74289	9.74103	7.98225	4.35273	1.36539	0.845873	0.758059	0.238403	0.269086	0.302786	0	0	0	0.253241	0.208263	0.580049	0.600352	0.576539	0.85632	0.742802	0.561014	0.648345	0.739995	0.837741	0.789616	0.800714	0.759796	0.822383	0.723713	0.705101	0.626286	0.645191	0.528425	0.48365	0.506722
[truncated: 22 more columns]

## Sheet: 9 days
Wave	200	205	210	215	220	225	230	235	240	245	250	255	260	265	270	275	280	285	290	295	300	305	310	315	320	325	330	335	340	345	350	355	360	365	370	375	380	385	390	395	400	405	410	415	420	425	430	435	440
252.03	0	0	0	0	0	0	0	0	0	0	0	0	0	0	0.131843	0	0	0	0.121741	0.220784	0	0	0.0724044	0	0	0.138222	0.0513071	0.0847421	0	0	0.0372432	0.00735006	0.0826883	0.0570529	0	0	0	0.0185436	0.0966566	0.021394	0.00745566	0.107706	0	0	0.0403268	0.0634453	0.00964144	0	0.0366856
252.96	0	2.44093	0	0	0	0	0	0	0	0	0	0	0	0	0.130565	0.0063553	0	0	0.0875081	0.109742	0.0984218	0	0.0435721	0	0.0960118	0.0362922	0.0164502	0	0	0.0288443	0	0	0	0.0841195	0.0500266	0.111246	0.0498844	0.0975073	0.0767123	0.0491914	0.0803832	0.0522973	0	0	0.0191245	0.0253212	0	0	0.0527172
254.06	0	2.74454	0	0	0	0	0	0	0	0	0	0	0	0	0	0	0	0.0331895	0.0726206	0	0.135116	0	0.0146964	0	0	0	0.132135	0	0.00269056	0	0.0383507	0	0.00158761	0.0482403	0.080114	0.155334	0.0572847	0.0511298	0.0738361	0.0161178	0.068635	0	0	0.0453349	0	0	0.00652584	0	0.0249553
255	0	0	0.276347	0	0	0	0	0	0	0	0	0	0	0	0	0	0.0902277	0	0.015479	0	0	0	0.040302	0.0165544	0	0	0.143841	0	0.121668	0.0545326	0.10612	0	0.0576177	0.0421502	0.00952589	0.0356356	0.0596444	0.0106409	0	0	0.00477846	0.0140626	0	0.0906202	0	0	0.00151729	0	0.0145029
255.93	0	0	4.71626	0	0	0	0	0	0	0	0	0	0	0	0	0	0.258702	0	0	0	0	0	0.0445471	0	0	0	0.193094	0.0419405	0.021482	0.0559239	0.0176364	0.0230685	0.0703699	0	0.0401118	0	0.0910264	0	0	0	0	0.00771495	0	0	0	0.0128595	0.000657515	0.0477534	0.00590971
257.03	0.207491	0	2.6348	0	0	0	0	0	0	0	0	0	0	0	0	0	0	0	0	0.0274073	0	0.0904788	0.0270231	0.0475057	0	0	0.174281	0.0992227	0	0.0376683	0	0.0172467	0.0141668	0.00332254	0	0	0.0985735	0	0	0.0638085	0	0.0221696	0	0	0	0	0	0.0251064	0
257.96	2.81923	0	0	0	0	0	0	0	0	0	0	0	0	0	0	0.0874422	0	0	0	0.153586	0	0.00377585	0.0340562	0.17497	0	0	0.106929	0	0	0	0	0	0	0.117002	0.0291693	0	0.0815509	0	0.0604619	0.0838958	0	0.000901681	0.0538065	0	0	0.0005084	0	0.0230239	0
259.06	1.25553	0	0	0.112427	0	0	0	0	0	0	0	0	0	0	0	0.139701	0	0	0.0360951	0.161126	0	0	0	0.212924	0	0	0	0	0.037182	0	0	0	0	0.0726892	0	0	0.063498	0.0453996	0.0733472	0.097129	0	0	0	0.0480635	0.00162539	0.000532151	0	0.000697308	0.0140286
260	4.44226	0	0	2.37624	0	0	0	0	0	0	0	0	0	0	0	0	0	0.0463807	0.0620565	0.0517615	0	0	0.0411144	0	0	0	0	0	0	0	0	0.0867367	0.0485386	0	0.0606922	0.00239931	0	0.0603959	0.0556967	0.0618476	0	0	0	0.0637919	0	0.00284515	0	0.0263911	0.0453745
260.93	4.19472	0	0	0.0992023	0	0	0	0	0	0	0	0	0	0	0	0	0	0.0409533	0.000590116	0	0.112482	0.0980307	0	0	0	0	0	0	0	0	0	0.121333	0	0	0.102865	0.0575757	0.0334268	0.00772159	0.080385	0.0399688	0	0	0.0511924	0.0251452	0	0.0310258	0.0507224	0.0364165	0.0464038
262.03	0	0	0	1.07236	0	0	0.280189	0	0	0	0	0	0	0	0	0	0	0.067406	0	0	0.00889555	0.0917307	0	0	0	0	0	0	0	0	0	0.0885134	0	0	0.0703251	0	0.00462586	0	0.0804279	0	0.0161144	0.0345434	0.00423613	0.0445174	0.0243041	0.0463125	0.0802143	0.0299082	0
262.96	0	2.97789	0.362723	0	0	0	0.439183	0	0	0	0	0	0	0	0	0	0	0.0415601	0	0	0.0459258	0.0386184	0	0.00838695	0	0	0	0	0	0	0	0.108537	0	0	0	0	0	0	0.0572435	0.0461551	0.0764134	0.017273	0	0.0668586	0.0444115	0.0381057	0	0.0264363	0
264.06	1.44154	0	0	0	0	0.279379	0.245623	0.366745	0	0	0.558858	0	0	0	0	0	0	0	0	0	0	0	0	0	0	0	0	0.0477117	0	0.0828607	0.0906565	0.0764569	0	0	0	0	0	0	0.0298412	0.0407555	0.00801704	0	0	0.0638168	0.0219349	0.0405269	0	0	0
265	6.91416	0	0	0	0	0.697191	0.717237	0	0	0	0.914299	0	0	0	0	0	0	0	0	0	0	0	0	0	0	0	0	0	0	0.135015	0.149047	0.0601795	0	0	0	0.0172371	0.0439367	0	0.0264448	0.104806	0.0257068	0.0535057	0	0	0.00157266	0.0433056	0	0	0.0519592
265.93	0	0	0	0	0	0.311066	0.759215	0.519747	0	0	1.48754	0.689043	0	0	0	0	0	0	0	0	0	0	0.0496337	0.0602591	0	0.214055	0.173763	0	0.0811151	0.0658979	0.0359817	0.065277	0	0	0	0.0429352	0.0730144	0.098479	0.0143357	0.0373856	0.0113949	0.111973	0	0	0.0261601	0.0478189	0.0220533	0	0.0598885
267.03	0	0	1.50873	0	1.38235	0.468913	1.82104	1.49802	2.10708	1.09672	2.31105	1.98672	0	0	0	0.0558981	0	0	0	0.0299576	0	0	0	0.122832	0	0.104788	0.0707919	0	0	0.0598136	0.00292671	0.000298818	0	0	0	0	0.0749476	0.1142	0	0.0123023	0.0561213	0.0349698	0	0.0129607	0.0384576	0	0.00220358	0.0154618	0.0418033
267.96	0	0	0	2.39359	0	0.81935	2.68292	3.54372	4.43625	3.602	4.146	4.92406	2.8291	0	0	0	0	0	0.0766436	0.014109	0.0297839	0.0586655	0	0.0343015	0	0	0.0370049	0	0	0.0745778	0	0.0707904	0	0	0	0	0.0642372	0.117153	0.0104551	0	0.0236534	0	0	0.0633522	0	0	0	0.0453725	0
269.06	0	0	0	2.18455	0	2.31272	4.20453	6.69801	8.04109	7.10047	6.86991	8.56045	8.48804	0	0	0	0	0	0	0	0	0	0	0	0	0	0	0	0	0.151998	0	0	0	0	0	0	0.0686825	0.105986	0.0554892	0	0.0501378	0.0383949	0.0534672	0.0261544	0	0	0	0.0361364	0
270	0	0	0	1.09413	0.777759	5.34649	5.47255	10.3865	12.0111	11.5992	10.9819	12.3579	12.8454	0	0	0	0	0	0	0.0244286	0.0737293	0	0	0.0216422	0	0	0	0	0	0	0	0.000182632	0.0148683	0	0	0.0011079	0.017482	0.0697043	0.106631	0.0124279	0.0533805	0.0990008	0.148768	0	0	0.0479334	0	0	0
270.93	0	8.74135	8.95272	0.720101	5.84422	7.2101	8.05067	14.5954	18.1895	16.8101	16.2498	16.8502	18.031	0	0	0	0	0	0	0.0302487	0.0875236	0	0	0	0	0	0	0.178287	0	0	0.0435333	0	0.0360806	0	0	0	0.020614	0.025216	0.0464364	0.0318177	0.0342021	0.0393673	0.0342162	0	0.0303202	0.0436569	0	0	0
272.03	3.76471	7.23413	9.39796	10.1502	8.41553	10.1058	11.2067	18.103	24.3751	23.0006	22.0859	23.3249	24.398	7.66901	0	0	0	0	0	0.00580306	0.0855184	0	0	0	0	0	0.0133762	0.151017	0.0935784	0.0344453	0.0210067	0.017556	0.0162525	0	0.0288966	0.0440652	0	0.0625015	0.0359008	0.0233082	0	0	0	0.00402804	0.0198834	0	0	0	0.00309344
272.96	3.52233	7.62999	2.29866	12.8134	12.7206	11.0637	14.202	22.3822	31.0881	30.0688	27.3994	29.8918	31.7847	26.4371	0	0	0	0	0	0	0	0	0	0	0	0	0.120535	0.0738698	0.0987717	0.0294156	0	0	0.0343102	0	0.0504168	0.0674294	0	0.0545879	0.0625378	0.0284632	0	0	0	0	0.00477393	0	0	0.0178023	0
274.06	15.3029	0	0.654981	8.00452	15.1251	13.6035	17.1519	26.9159	35.997	36.3119	32.8788	35.6433	37.9776	35.4854	0	0	0	0	0	0	0	0	0.0919113	0.151307	0	0	0.129698	0	0	0	0	0	0	0	0.0918172	0.0176745	0	0	0.106163	0	0.0463273	0	0	0.0489767	0.00951272	0	0	0	0
275	20.3178	0	9.64842	3.83423	21.5079	15.4608	18.5923	31.048	40.6631	41.5682	37.0144	40.7346	42.9215	41.9687	0	0	0	0	0	0	0	0	0	0.121849	0.155643	0.0434621	0.106522	0	0	0.159951	0	0	0	0.00186927	0.106063	0.0820979	0	0	0.0171084	0	0.0820021	0	0	0.00534324	0	0	0	0	0
275.93	18.2121	4.01853	7.75529	6.03934	20.1663	16.9578	20.8432	33.7761	45.4548	45.6217	41.2067	44.6376	47.4275	46.4268	0	0	0	0	0	0	0	0	0	0.050873	0.109106	0.155067	0	0	0	0.140302	0	0.00717754	0	0	0	0.0213691	0.0701776	0	0.0435704	0.0764763	0.047605	0	0.000449265	0.00721491	0	0	0	0.0202782	0.0187955
277.03	18.0868	11.6962	10.8507	15.2136	20.186	18.0976	23.1873	36.5154	48.9875	49.6846	45.3159	48.4537	51.247	51.2809	14.7099	0	0	0	0	0	0	0	0	0.0668571	0.241859	0.100588	0	0	0	0.115814	0	0.0277779	0.039127	0.036716	0	0	0.0833869	0	0.072916	0.115045	0.0783001	0	0	0	0	0.0269172	0.032646	0.0307017	0
277.96	18.8619	10.9804	12.1029	18.4059	20.5119	20.3669	26.3558	39.4048	53.8741	55.2234	50.3756	53.0289	55.63	55.7471	30.6267	0	0	0	0	0	0	0	0	0	0.233505	0.119237	0	0	0.0514938	0.137155	0	0	0	0.16954	0	0	0.030903	0.0473524	0.0562761	0.0649074	0.134096	0	0	0	0.012158	0.0236812	0	0.0124507	0.0101519
279.06	12.4547	11.777	9.51007	16.7407	24.0667	23.0192	27.9834	42.2237	57.0568	59.5228	55.0301	57.8701	59.4109	60.9394	36.7538	0	0	0	0	0	0	0	0	0.0490903	0.130498	0.0220997	0.159858	0	0.0627439	0.176681	0.076296	0	0	0.0717512	0	0.0303937	0	0.0262401	0	0	0.0256623	0	0	0.00309486	0.0309262	0.0350378	0	0	0.017371
280	9.39316	24.9517	7.99337	17.4022	23.2635	25.432	29.2199	45.142	60.4111	62.8472	59.6117	61.1469	64.7897	64.4977	40.2504	0	0	0	0	0	0.0287329	0	0	0.0769328	0	0	0.143813	0	0.0249572	0.0635251	0	0	0.0210917	0.0474365	0.0429667	0	0	0.104074	0	0.00680972	0	0	0	0.0818443	0	0	0	0.0293773	0.0141714
280.93	13.7223	23.4865	9.12016	22.2225	23.1031	27.7223	30.4403	47.6506	62.7701	65.2817	62.9464	63.5083	68.1322	66.6294	43.2556	0	0	0	0	0	0.0885204	0	0	0.109089	0	0	0.0770298	0.264195	0	0.170001	0.0163115	0	0.0306876	0.172798	0.0508143	0	0.0262667	0.123567	0	0.0961216	0	0	0	0.0158337	0	0	0	0	0
282.03	19.633	4.3103	13.1002	25.8659	21.2345	28.7198	32.8124	49.8674	66.5179	67.8588	64.8723	65.2985	70.059	67.6242	46.8149	1.37389	0	0	0	0	0	0	0	0.0232286	0.0262839	0.210218	0	0.247106	0	0.324605	0	0	0.0207619	0.146589	0	0	0.108583	0.0657774	0	0.10598	0.036217	0	0	0.00223743	0	0	0.0347745	0	0
282.96	17.6997	0	21.9162	20.5182	20.1385	28.8861	34.6491	50.9526	68.3055	68.8714	65.8706	67.227	69.3785	68.7682	49.0909	14.7995	0	0	0	0	0	0.0359661	0	0	0.00495885	0.325676	0	0.0592358	0.00164854	0.268457	0.0233763	0	0.0594984	0	0	0.0254957	0	0	0	0.0573068	0.0426017	0.0494028	0	0	0	0	0	0	0
284.06	17.8492	13.4339	24.5142	20.2564	24.2606	29.7229	35.5752	51.6219	69.1223	69.4546	65.4354	67.6398	69.1969	69.5988	51.7184	20.5669	0	0	0	0	0	0.0376293	0	0	0.0896902	0.105779	0	0	0.0321749	0.181221	0.0744534	0.168624	0	0	0.0224174	0.108937	0	0	0.0520867	0.0334763	0	0.0726002	0	0	0	0	0	0	0.00811432
285	22.2471	10.1767	18.1983	22.9242	31.1072	29.4414	35.9795	51.2071	67.875	69.9945	64.9127	67.5887	69.0604	69.9327	54.1809	24.7777	0	0	0	0	0	0.0761656	0	0	0.190932	0	0	0	0.0194941	0	0.0870687	0.21439	0	0	0.113949	0.124187	0.03645	0	0.144806	0.0597435	0	0	0	0	0	0	0	0	0
285.93	23.3715	9.50509	10.4216	28.331	31.48	31.7373	37.6122	52.4052	66.2811	70.0584	65.6644	67.44	69.8652	71.1341	56.939	28.4224	0	0	0	0	0	0	0	0	0	0.122171	0	0.0616702	0.00185641	0	0	0.110681	0	0	0.130493	0.00188421	0.0625333	0	0.147893	0.0137122	0	0	0	0.0447715	0.00150151	0	0.0324855	0.0151553	0
287.03	18.6305	11.524	16.8725	30.2896	29.2186	33.0526	38.9885	52.7537	67.0005	70.4648	66.6138	67.9485	70.1617	72.4064	59.6232	33.1998	2.80458	0	0	0	0	0	0	0	0	0.0999268	0	0.29476	0.138182	0.118224	0.0181144	0.101139	0	0	0.0765564	0.0167713	0.101233	0.0867704	0.0719311	0	0	0	0	0.028992	0.0384385	0.0179283	0.052722	0	0
287.96	17.4426	18.7985	10.2577	20.1183	26.1907	37.8105	40.8582	53.6822	68.1645	70.95	66.6384	68.8196	71.0659	73.4246	62.17	38.5441	20.5995	0	0	0	0	0	0	0	0	0	0.176624	0.209633	0.0199081	0.302393	0.085617	0.167868	0	0.0697946	0	0.131967	0.115977	0.102718	0	0	0	0	0	0.0428173	0	0.0338996	0.0290291	0	0
289.06	13.0985	9.83806	10.5073	21.3303	28.8002	39.5169	41.7766	53.7829	69.2684	71.1757	66.9151	69.8706	71.6305	73.2811	65.1043	43.7448	28.4453	0	0	0	0	0	0	0.0850568	0.0174974	0	0.133952	0.0415297	0.0299028	0.254207	0.0257002	0.105488	0	0.0129133	0	0.122716	0.189057	0.0437927	0	0	0	0	0	0.0282768	0	0.00552438	0	0	0
290	0.859047	1.98045	5.20806	17.3923	34.9946	41.961	42.9134	54.2764	68.5954	71.0606	66.6925	69.3683	72.027	73.6077	68.1911	47.8189	32.5216	0	0	0	0	0	0	0.014513	0.0225343	0.158106	0.102911	0.0446248	0.172546	0.150023	0.0996414	0.0441791	0	0	0	0.0278166	0.108339	0.00615769	0	0	0	0	0	0.0126139	0	0	0	0	0.00986594
290.93	0	1.80868	13.7749	18.5567	36.9255	40.5026	44.554	54.216	67.8863	70.1625	66.2244	68.2624	71.4924	73.7427	70.5724	51.4757	36.52	0	0	0	0	0	0	0.0151952	0.176309	0.0328552	0.0787938	0.320841	0.335736	0.0382355	0.14016	0.140609	0.0689446	0	0	0.0442448	0	0.0129754	0.00302528	0	0	0	0	0	0	0	0.00447002	0.0089141	0.0386797
292.03	0	6.65023	21.0269	15.0518	31.9604	43.4012	46.2268	52.8026	65.4077	68.1134	63.56	66.7769	70.6825	72.9548	71.844	55.5254	40.5323	1.90784	0	0	0	0	0	0	0.0550645	0.0825514	0.067211	0.284638	0.211462	0.142195	0.0272139	0.104076	0.0609194	0.0899793	0	0.170271	0.00449948	0.0832286	0.0871348	0	0	0	0	0	0	0.00964754	0	0.0329298	0.012685
292.96	9.05015	11.3166	23.6638	24.7546	30.4501	44.3592	46.7007	50.4007	63.5484	65.1934	61.0968	65.6613	68.4884	70.5466	73.5744	59.8932	44.6804	14.4667	0	0	0	0	0	0	0.184221	0.0604917	0.00323984	0.164865	0.0640843	0.141571	0	0.099156	0	0.14078	0	0.126384	0.0899464	0.0656312	0.0768132	0	0.0548706	0	0	0	0	0.0165876	0	0	0
294.06	18.8088	16.9443	24.4725	22.87	30.6182	45.1659	45.7761	50.1332	61.6968	62.849	58.7637	62.6763	66.3553	68.1754	74.5317	63.592	46.8629	18.8564	0	0	0	0	0	0	0.0294559	0.0389484	0	0.00388092	0.11482	0.0790931	0	0.11932	0	0.00950617	0.0283078	0.0048783	0.148784	0	0.0364097	0.000735338	0.0500061	0	0	0	0	0	0	0	0
295	18.4295	18.9397	20.9958	21.6207	27.2477	42.851	46.048	50.2569	60.5315	60.9746	57.5473	60.8176	65.0671	67.7518	74.938	67.1765	50.0118	20.664	0	0	0	0	0	0	0	0	0	0	0.154149	0	0.028413	0.182426	2.54669e-05	0	0	0	0.128455	0	0	0	0	0	0	0	0	0	0	0.0021698	0
295.93	9.77586	11.3726	20.647	14.1463	25.4135	45.3759	46.8173	49.2741	58.3049	60.0321	55.789	58.2924	63.3691	66.3495	74.9392	69.4106	53.3875	22.3119	0	0	0	0	0	0	0	0	0	0.0607396	0.167486	0.0667486	0	0.0645519	0.0705286	0	0	0	0.0474242	0.032214	0.096537	0	0	0	0	0	0	0	0	0.0438701	0
297.03	3.60159	5.85614	24.3015	14.5095	28.6759	47.2348	47.8128	47.4247	55.1546	58.1325	54.1144	56.7503	60.6927	65.3876	75.005	72.1742	57.1601	23.6911	0	0	0	0	0	0	0	0	0	0.153551	0	0.0268552	0	0.0864427	0.030804	0.0565405	0	0	0.0206109	0.077958	0.0974512	0.0378048	0	0	0	0.0343046	0.0212845	0.000567499	0	0.0519986	0
297.96	11.0268	17.9743	23.6059	22.1266	29.8386	47.1939	49.1043	46.5005	53.8082	55.5012	52.9739	54.6952	58.394	64.0924	75.2567	74.0079	59.353	25.1965	0.556658	0	0	0	0	0	0	0	0	0.107866	0	0.0627247	0	0	0.0247395	0.0694341	0	0	0.0290452	0.0648638	0.049829	0.097832	0	0	0	0.0691275	0	0.00587737	0	0.0383876	0.00169547
299.06	26.0179	21.9535	14.2832	27.8312	27.5894	44.8313	49.2299	44.7524	53.2484	53.2208	50.6487	53.7805	57.1752	63.8454	75.8204	77.0024	60.6105	26.4003	3.77556	0	0	0	0	0	0	0.0200204	0	0	0	0.000370214	0.0423065	0.108371	0.0101035	0.135778	0.00375797	0.119317	0	0.0724098	0	0.0637263	0.132729	0	0.012411	0.0710056	0	0	0	0.0363182	0
300	23.538	19.6206	10.9551	20.4821	27.36	46.7002	48.8806	44.2427	51.3787	51.4222	48.7084	52.0486	55.2801	61.0047	76.1219	78.2901	62.286	27.2636	4.83491	0	0	0	0	0	0	0	0	0.0248122	0	0.0342729	0.0385232	0.0850711	0.0951264	0.207647	0	0.138281	0	0.0365075	0	0.025676	0.0979192	0	0	0	0	0	0	0.0290798	0
301.07	14.9114	5.80353	19.7045	12.1863	25.2162	48.1615	47.8989	42.9103	47.598	49.3767	47.0788	49.7936	52.8973	58.1631	75.5562	78.4183	63.5746	28.0863	5.0047	0	0	0	0	0	0	0.0203266	0.137613	0.0408641	0.0147897	0	0	0.199644	0.193607	0.207383	0.0434737	0.150834	0	0.000260887	0.0332731	0	0.0522103	0	0	0	0	0	0	0.00535159	0
302	3.30255	7.00056	8.55523	10.4842	23.8299	49.2152	47.4544	40.8119	45.718	46.8156	45.5304	47.3732	50.6134	56.1294	74.8995	77.8359	64.8052	28.4236	5.06612	0	0	0	0	0	0	0.0257914	0	0	0.0850225	0	0	0.14039	0.207369	0.073238	0	0.0204635	0	0	0.00407953	0	0	0	0	0	0	0	0	0.0176665	0
303.07	14.2924	10.8966	2.87832	12.3408	22.8472	47.393	45.9281	38.4619	44.1881	45.2466	42.6983	45.8501	48.813	54.8998	74.701	77.61	64.9919	28.8874	5.16748	0	0	0	0	0	0	0	0	0	0.0335041	0	0.143884	0.115307	0.0755743	0	0.0419917	0.0824445	0	0	0	0	0.0352407	0	0	0.0939541	0.00492008	0	0	0	0.0105055
304	10.4253	12.5771	1.84206	11.7322	23.1484	44.5605	44.3366	37.6285	42.038	43.1434	40.2925	43.6711	46.337	52.8231	74.6809	78.0243	65.4417	28.8421	5.4727	0	0	0	0	0	0	0	0	0	0.176804	0.0308608	0.21442	0.0145845	0.0259873	0.0591751	0.12681	0.0813666	0	0	0	0	0.0195551	0	0	0.110688	0.039062	0	0	0.0327795	0.039437
305.07	14.8885	10.9156	11.8361	13.778	21.5583	42.6162	43.8439	37.3643	41.0178	40.9679	38.8053	41.5871	44.1259	50.7685	73.867	78.0498	64.766	29.0109	5.56367	0.159548	0	0	0	0	0	0	0.135206	0	0.226959	0	0	0.0437325	0.182695	0.0856133	0.169411	0.0347522	0.0477656	0	0.0786665	0	0.0241584	0	0	0.127521	0.0120068	0.0130415	0	0.0280019	0.0256733
306	8.13673	13.4773	12.046	14.6343	17.2286	41.9748	43.9535	36.3626	40.0926	39.4422	37.9033	39.8101	42.8261	49.109	71.7369	79.2891	64.3235	28.8905	5.64571	0.396452	0	0	0	0	0	0	0.0748193	0	0.276255	0	0	0.202197	0.163135	0	0.124013	0.0472928	0.121755	0.10982	0.0522126	0	0	0	0	0.0387965	0.0186279	0.0298693	0	0.0223337	0.0275264
307.07	0.05468	16.1842	8.80193	9.21671	17.2356	43.3671	43.003	34.5212	38.3379	38.2234	36.3326	38.2677	41.7891	47.5525	69.8823	77.9246	63.304	28.8516	5.78465	0.271609	0	0	0	0	0	0	0	0	0.0633781	0.0478641	0.0749059	0.181456	0.120994	0	0.0240314	0.0507851	0.134205	0.0806284	0	0	0.0027343	0.0403763	0	0	0	0.0368444	0	0	0.0099936
308	1.08297	14.9208	15.2333	12.9419	17.3651	43.7863	40.8865	33.3803	36.0667	36.099	34.7784	35.994	40.1568	45.6191	68.5458	76.1152	61.7177	28.2181	5.85153	0.324943	0	0	0	0	0	0	0	0	0.0868944	0	0.281689	0.0545333	0	0.00315661	0.109884	0	0.0823736	0.00348281	0	0	0	0.0137533	0	0	0.00699148	0.0247594	0	0	0
309.07	10.4146	15.6669	16.0717	13.7999	15.8974	43.2488	39.1012	31.6607	35.294	34.2155	33.5825	34.2906	37.817	44.3461	67.9708	74.8409	60.1852	27.6922	5.74709	0.441119	0	0	0	0	0	0	0	0	0.0551792	0	0.224595	0	0	0.0394102	0.0786248	0	0.133886	0	0	0	0	0	0	0	0.0286179	0	0	0	0.00449963
310	7.38864	6.8079	16.6148	15.0266	15.8676	40.7271	39.5866	30.5456	33.6764	33.3926	32.2099	33.505	36.6914	43.1638	66.2152	75.1388	59.5352	27.5851	5.83824	0.487412	0	0	0	0	0	0	0	0	0.158492	0	0	0.0186224	0	0.138006	0.0549833	0.0640195	0.1193	0	0	0.0845247	0	0	0	0.0855524	0.0217124	0	0.0375051	0	0.00434541
310.93	0	0	7.63061	4.5492	16.8123	39.8544	40.1672	29.3851	30.949	32.2646	30.254	32.2897	35.2362	41.8933	64.2075	73.2911	58.6327	26.9766	5.96188	0.688124	0	0	0	0	0	0	0	0.13946	0.0889853	0	0	0.0783863	0.0439387	0.10316	0	0.0497045	0.0325404	0.0500337	0	0.00867773	0	0	0	0.0717345	0	0	0	0	0
312.03	9.2106	0	9.98856	6.61741	15.8378	39.8871	39.8568	30.0191	29.9101	30.7643	28.9838	30.6816	33.7952	39.7101	61.9484	71.4389	57.5622	26.1756	5.9017	1.02795	0	0	0	0	0	0	0	0.242092	0	0	0.0578028	0.00252293	0.0131662	0	0	0	0	0.0641546	0	0	0	0	0	0.00754885	0	0	0.000109498	0	0
312.96	4.65848	11.8196	10.9244	3.37678	15.2956	37.2445	37.9265	27.9478	29.8627	29.9832	28.4773	29.1894	32.075	37.7211	60.2779	69.6633	56.4442	25.2452	5.84613	0.99842	0	0	0	0	0	0	0	0.172785	0	0.061289	0.191049	0.0644381	0	0	0	0	0.0184266	0.11281	0	0	0	0	0	0	0	0.00542138	0	0	0
314.06	5.42522	12.6031	14.8278	10.0122	17.6242	34.9389	36.9409	26.836	29.3372	28.8683	27.0669	28.2233	31.138	36.991	59.0298	66.9685	55.1916	24.49	5.77712	0.898268	0.0801371	0	0	0	0	0	0	0.205053	0	0.0506592	0.0177458	0.0801413	0	0	0.15678	0	0.0736025	0.140366	0	0.0745716	0	0	0	0.0590082	0	0	0	0	0.0205498
315	6.66846	5.12782	9.68664	10.0722	17.9726	34.7575	35.1389	25.5828	27.4305	27.3131	25.1666	27.1548	29.7873	36.2272	57.3426	64.7888	54.1539	23.8445	5.6229	0.994912	0.34666	0	0	0	0	0	0	0.0778425	0	0	0	0.0897964	0	0	0.202892	0	0.0209485	0.135899	0	0.108072	0	0	0	0.0749451	0	0	0	0	0.0538219
315.93	17.8593	10.4753	5.48435	12.468	15.9329	33.8263	33.5227	25.5677	26.2689	26.0521	24.2969	26.7144	28.6084	34.7609	55.1078	63.3056	53.3732	23.0271	5.40135	1.23725	0.412951	0	0	0	0	0	0	0.0548319	0.05649	0	0	0	0	0.0515443	0.107686	0	0.000111023	0.0256375	0	0.0414509	0	0	0	0	0	0	0.0372006	0	0.0368206
317.03	9.84837	16.7062	2.23485	9.15566	16.7976	32.3235	30.9958	24.2983	25.942	24.8789	23.5456	25.4997	27.9345	32.9323	52.6721	61.9928	51.4768	22.9632	5.43921	1.22635	0.439241	0	0	0	0	0	0	0	0	0.0463634	0	0	0	0.031443	0	0	0	0	0.001615	0	0	0	0	0	0	0	0.0039343	0	0.00436518
317.96	11.5127	15.0501	7.22941	7.79357	17.1567	31.2859	30.5555	23.4483	24.6007	23.5688	22.4637	24.2458	26.656	31.6697	51.1335	59.3439	49.4976	22.2957	5.16315	1.29495	0.572544	0	0	0	0	0	0	0	0.0486102	0	0.009134	0	0	0	0	0	0	0	0.056028	0	0	0	0	0.00360775	0	0	0	0.0187492	0
319.06	8.24303	12.988	12.0102	9.29719	17.1264	30.6373	29.3089	22.254	23.1037	22.5596	21.3413	23.7717	25.5059	30.6736	49.3796	57.7324	48.0642	21.8136	4.77813	1.37556	0.677042	0	0	0	0	0	0	0	0	0	0	0	0	0	0.00269093	0.145729	0	0	0.0940356	0	0	0	0	0	0	0	0	0.00587994	0
320	7.95739	11.5398	8.19265	7.22081	13.3939	29.8487	28.32	21.9044	22.4573	21.9487	20.9373	23.4072	24.2675	29.4814	47.5047	55.2876	46.9706	20.8241	4.3644	1.29055	0.640326	0	0	0	0	0	0	0	0	0	0	0	0	0	0.0608817	0.0669124	0	0	0.0881847	0.0342992	0	0	0	0	0	0	0	0	0
320.93	4.97865	3.44122	1.65091	9.51595	9.8957	28.4485	27.2827	21.5959	22.2732	21.5286	19.9099	21.3984	23.6599	28.6998	45.3462	53.014	44.77	20.5944	4.26054	1.47509	0.572612	0.0624788	0	0	0	0	0	0	0	0	0	0.0588465	0.128186	0	0	0	0	0	0	0.0251351	0	0	0	0	0	0	0	0	0
322.03	9.24636	0	3.31939	12.9157	10.5616	27.1427	26.3141	20.1531	20.7243	21.1325	18.8873	19.8939	22.0994	26.8639	43.1975	51.0966	42.7174	20.1094	4.18965	1.57573	0.735185	0.380345	0	0	0	0	0	0	0	0	0	0	0.0302208	0.0191869	0	0	0	0	0	0	0	0	0	0	0.00234264	0	0	0	0
322.96	8.31343	6.38532	5.15261	14.9087	12.4519	25.5176	25.1585	19.0848	19.758	20.29	18.0783	19.5217	20.8437	25.6317	40.7156	48.947	40.827	19.7034	4.24514	1.72812	0.984581	0.457031	0	0	0	0	0	0	0	0	0	0	0.0177708	0	0	0	0	0	0	0	0	0	0	0	0.0442268	0.0109758	0	0	0
324.06	10.9229	5.79279	9.16628	5.98641	13.7313	25.1904	23.4975	17.9941	18.3663	18.9056	17.4275	19.303	19.497	24.0789	39.383	46.8164	39.3667	19.1149	4.15415	1.65596	1.31554	0.611873	0.00952576	0	0	0	0	0	0	0	0	0	0	0.00470508	0	0	0	0	0.0207507	0	0.0612316	0	0	0	0.00501733	0.0102672	0	0.00249506	0
325	0	2.58585	11.5506	4.0517	12.5377	23.9937	23.0579	17.4064	17.8652	17.6251	16.3769	17.9852	19.1436	23.1601	38.6771	45.1719	37.6916	18.8718	4.45207	1.57467	1.37252	0.61576	0.139322	0	0	0	0	0	0	0	0	0.0222974	0	0	0	0.00407289	0.0334572	0	0.0203251	0.00502319	0.051832	0	0	0	0	0	0.0328437	0	0
325.93	4.61894	3.56415	2.67457	5.65564	11.2541	22.8475	21.8585	16.2947	16.9579	16.8606	15.5527	17.0559	18.7411	22.3012	37.9365	44.3474	35.9149	18.5739	4.88626	1.35218	1.57471	0.73182	0.264622	0	0	0	0	0	0	0	0	0.0204454	0	0.0733756	0	0	0	0.0247037	0	0	0.023405	0	0.0126168	0	0	0	0.0351701	0	0
327.03	9.71646	5.13321	0	7.36581	9.88532	21.7458	21.7096	15.5581	16.99	16.5882	15.1591	16.0865	18.1069	21.7666	35.145	41.788	34.3457	17.9852	5.35613	1.42986	1.51039	0.849868	0.447327	0	0	0	0	0	0	0	0	0.015062	0	0.0746188	0.0209777	0	0	0.126479	0	0	0	0	0	0	0	0	0	0	0
327.96	12.7622	0	0	0	10.8594	20.7266	20.7554	15.4335	16.3391	16.2154	14.934	15.4252	16.9972	20.4883	32.8147	39.7612	33.4084	17.2026	5.50084	1.58161	1.5668	1.24288	0.421135	0	0	0	0	0	0	0	0	0	0	0	0.0965198	0.0677635	0.0483926	0.133837	0.0402289	0	0	0	0	0	0	0	0.00129698	0	0
329.06	2.16366	0	9.6258	2.1216	8.44115	19.2654	19.2481	14.9737	16.1807	15.5192	14.622	14.6727	16.2229	19.2647	31.5948	37.6889	32.3824	16.756	5.6	1.79091	1.44242	1.32229	0.476376	0	0	0	0	0	0	0	0	0	0	0	0.0488477	0.1487	0.0453007	0.064581	0.0757018	0	0	0	0	0.0265178	0	0	0.00681571	0	0
330	0	0	5.75402	6.91626	9.30541	17.7772	17.8308	14.3894	15.3806	14.4943	13.6216	14.2344	15.5834	19.1369	31.1036	36.7369	31.173	16.4932	5.56428	1.88434	1.58622	1.49654	0.746536	0.00348326	0	0	0	0	0	0	0	0	0	0	0	0.093	0.0229795	0	0.00950592	0	0	0	0	0.0251138	0	0.06148	0	0	0
331.07	0	0	5.81077	4.88432	7.92081	17.1168	17.2296	13.3429	14.4567	13.8076	12.8806	13.9918	15.067	18.7367	29.6564	35.1528	29.4721	16.0058	5.89189	2.15059	1.56991	1.77841	1.16524	0.163999	0	0	0	0	0	0	0	0	0.0652519	0	0	0.0884453	0.0238727	0	0	0	0	0	0	0.0249245	0	0.0481885	0	0	0.0190265
332	0	0	0	0	7.54362	16.5872	16.4224	13.1067	13.645	13.1263	12.3785	13.3248	14.7482	17.1502	28.2124	34.1137	28.1796	15.4894	6.25258	2.36092	1.69897	1.88423	1.34894	0.131441	0	0	0	0	0	0	0	0	0.0152285	0	0	0	0	0	0	0	0	0	0	0.0139707	0	0.0161974	0	0	0
333.07	0.527908	5.15818	6.58463	0	6.92169	14.481	15.9372	13.6401	13.1881	12.611	11.8148	12.3332	14.2874	15.7702	27.424	32.4709	27.335	14.7959	6.38233	2.97446	1.62148	1.85247	1.43007	0.457525	0	0	0	0	0	0	0	0	0	0	0	0	0	0.0599596	0	0	0	0	0	0	0	0	0	0	0
334	0	3.86296	4.39427	1.04115	2.66821	13.2033	15.2741	12.9535	12.2804	12.1033	11.1085	11.677	13.5256	15.6023	26.0998	31.0693	26.4982	14.6739	6.35569	3.44084	1.83815	1.92987	1.39505	0.584755	0.279788	0	0	0	0	0	0	0	0	0	0.0226985	0	0	0	0	0.0294001	0	0	0	0	0	0.0183365	0	0	0
335.07	7.16671	0	0.94332	1.1735	0	13.0998	14.5913	12.2149	11.5796	11.9335	10.7467	10.9852	12.8396	15.3468	24.7223	29.6304	25.6321	14.6285	6.60447	4.0624	2.03779	2.1833	1.61087	0.963686	0.420227	0	0	0	0	0	0	0	0	0	0	0.0113554	0	0	0	0.0383586	0	0	0	0	0	0	0	0	0.00680616
336	6.85261	0	0.0323304	4.41049	0	12.0438	13.4437	11.0509	11.1889	11.5853	10.6686	10.3666	12.2708	14.2616	23.8343	28.5249	24.7056	14.4672	7.14152	4.28823	2.63229	2.38848	2.1255	1.26035	0.633897	0	0	0	0	0	0	0	0	0	0	0.00327444	0.0511579	0	0	0.0153645	0	0	0	0	0	0	0	0	0.00511157
337.07	0	0.111428	2.85414	2.55417	1.33755	10.929	12.7512	11.3987	10.7135	10.9025	9.89508	9.86653	11.3851	13.6265	23.0553	27.5472	24.0115	14.269	7.4228	4.81868	3.06946	2.3721	2.29838	1.70742	0.966447	0.0464742	0	0	0	0	0	0	0	0	0	0.0140959	0.120094	0.00683796	0	0	0	0	0	0	0	0.00459454	0	0	0.000349933
338	0	0	7.00704	0.662797	2.56187	11.1578	11.6148	10.4115	9.93727	10.3745	9.35507	10.0845	10.5042	13.0866	21.914	26.4968	23.4195	14.2969	7.54427	5.3922	3.62897	2.44332	2.26015	1.72748	1.35223	0.296541	0	0	0	0	0	0	0	0	0	0	0.0232917	0	0	0	0	0	0	0	0	0	0	0	0
339.07	0.603869	0	3.12991	0.453492	6.10274	12.2669	11.1039	9.38646	10.1352	9.82418	8.77077	9.72364	9.81016	12.6196	21.0724	25.6796	23.1121	14.2164	7.64266	5.83593	3.97718	2.7091	2.51153	1.83581	1.47972	0.583232	0	0	0	0	0	0	0	0	0	0	0	0	0	0	0	0	0	0.00296741	0	0	0	0.0127284	0
340	0	0	1.16494	2.02849	6.39046	11.2026	11.7257	9.18144	10.521	9.57145	8.78941	9.58531	9.69645	11.9804	20.6515	25.1608	22.5473	13.9297	8.03449	6.02809	4.29003	3.03057	3.11041	2.15756	1.55361	0.85406	0	0	0	0	0	0	0	0	0.0299544	0	0	0	0	0.00129409	0	0	0	0	0	0	0	0.00469648	0
340.93	0	0	2.62513	0	6.24675	10.5026	12.736	9.94611	9.98677	9.25214	8.77875	9.40937	9.6006	11.5245	19.7512	24.4991	22.4413	14.0056	8.36873	6.18443	4.72164	3.15475	3.26426	2.51279	1.74999	0.969329	0.0989099	0	0	0	0	0	0	0	0	0	0	0	0	0	0	0	0	0	0	0	0	0	0
342.03	0	0	0	0	2.43259	9.83338	11.8912	9.91008	9.43847	8.9578	8.48913	8.67511	9.26285	10.878	19.0286	23.765	21.9264	14.399	8.66343	6.40579	5.36101	3.49062	3.24249	2.88806	2.00535	1.08404	0.0714544	0	0	0	0	0	0	0	0	0	0	0	0.0426858	0	0	0	0	0	0.0411839	0	0	0	0
342.96	0	0	0	0.418199	3.36882	9.79374	10.0571	8.74335	9.44098	8.26089	7.55693	7.71678	8.65833	10.2671	18.6418	22.8	21.0929	14.6333	9.05202	6.71378	5.95755	4.0593	3.66622	3.27431	2.39065	1.36095	0.353523	0	0	0	0	0	0	0	0	0	0	0	0	0	0	0	0	0	0.00378284	0.00174843	0	0	0.00949474
344.06	0	0	0	7.33183	2.89974	9.50299	9.38006	8.23159	9.57752	7.92135	7.30232	7.7192	8.36198	9.95148	18.5865	22.2805	20.6249	14.3167	9.37646	7.33458	6.34041	4.63054	3.9172	3.67177	2.7619	1.86134	0.529947	0	0	0	0	0	0	0	0	0	0	0	0	0	0	0	0	0	0	0	0	0	0.00614545
345	0	0	8.17237	0	3.44646	9.34408	10.0871	7.89593	8.95558	7.561	7.27958	7.68488	8.18159	9.87701	18.176	21.9544	20.9128	14.1374	9.77756	8.0059	6.55579	5.21857	3.99194	3.83886	3.19912	2.12922	0.879212	0.0967985	0	0	0	0	0	0	0	0	0	0	0	0	0	0	0	0.021625	0	0	0	0	0
345.93	1.55739	0	4.28206	0	1.59992	9.28371	10.1082	7.64445	8.117	7.30341	6.93658	7.36069	8.03433	9.68022	17.3673	22.217	20.6732	14.5159	10.1349	8.48682	6.89605	5.61716	4.06594	4.19687	3.82912	2.55465	1.30563	0.575741	0	0	0	0	0	0	0	0	0	0	0	0	0	0	0	0	0	0	0	0.0382521	0.02201
347.03	1.80459	0	5.39605	0	3.60738	8.86533	9.86495	8.09705	7.50571	7.1047	6.53249	6.78084	7.88821	9.46732	16.8887	22.0318	19.8648	15.1907	10.623	8.93262	7.4207	6.27259	4.66089	4.59373	4.21228	3.0946	1.94667	0.77555	0	0	0	0	0	0	0	0	0	0	0	0	0	0	0	0	0	0	0	0	0.0246334
347.96	8.38939	0	0.0244716	1.18099	3.49422	8.78035	9.76406	8.67146	7.12902	6.96322	6.43009	6.28952	7.37171	9.17524	17.061	21.8003	19.6112	15.2947	10.8573	9.58755	8.16971	7.29869	5.31671	4.78463	4.45416	3.60383	2.22999	0.942545	0	0	0	0	0	0	0	0	0	0.0232037	0.0120954	0	0	0	0	0	0	0	0	0	0
349.06	3.81179	3.73454	2.21416	0.656554	5.48379	8.07407	9.27105	8.23155	7.30576	6.96859	6.36394	5.50732	6.95626	9.1644	17.0402	21.1276	19.8175	15.38	11.409	10.181	8.98556	7.98335	6.21242	5.25917	4.90398	4.00596	2.80892	1.55863	0	0	0	0	0	0	0	0	0	0	0.0153201	0	0	0	0	0	0	0	0	0	0
350	0.304744	3.74356	0	0.168214	5.71787	7.96873	8.78483	7.23166	7.50652	6.67684	5.96007	5.64579	6.66347	8.75708	16.5813	20.8341	20.5827	15.5688	11.9325	10.5447	9.61008	8.56055	7.15548	5.80883	5.66055	4.86854	3.6283	2.31609	0.868151	0	0	0	0	0	0	0	0	0	0.0146338	0.0289891	0	0	0	0.0152797	0	0	0	0	0
351.07	0	0	0	0	3.83377	8.23508	8.75985	7.62901	7.73489	6.45234	5.86141	5.89323	6.68532	8.2554	16.6064	20.5898	20.5861	15.7936	12.5219	10.8968	10.1635	9.30026	7.93762	6.85	6.36388	5.46201	4.42197	3.00333	1.20139	0	0	0	0	0	0	0	0	0	0	0.0245935	0	0	0	0.0183114	0	0	0.00848442	0	0
352	3.357	0	0	0	3.1765	7.57905	9.19561	8.78165	7.29393	6.41857	5.67554	5.67192	6.41496	7.73485	16.4263	20.6725	20.0675	15.9697	12.8498	11.9147	10.6932	10.4406	8.83455	7.4784	7.16254	6.21702	4.92098	3.44046	1.57465	0	0	0	0	0	0	0	0	0	0	0	0	0	0	0	0	0	0.0179945	0	0
353.07	7.04631	0	2.74401	0	3.70167	7.23729	9.0317	9.4944	6.82572	6.47494	5.40335	5.17771	6.28849	8.2734	16.1232	20.6148	19.9988	16.557	13.6339	12.9351	11.7002	10.912	9.95619	8.22396	8.26234	7.11342	5.58483	4.03466	2.10903	0	0	0	0	0	0	0	0	0	0	0	0	0	0	0	0.00726036	0	0	0	0
354	3.01543	4.53738	4.00339	0	0.737832	8.81816	9.06784	8.41867	6.96014	6.08084	5.24891	5.11218	6.01997	8.30522	15.9523	21.2053	20.7095	17.275	14.4987	13.4479	12.5531	11.493	11.2933	8.86878	9.4766	8.56865	6.50284	5.1367	2.83905	0.497512	0	0	0	0	0	0	0	0	0	0	0	0	0	0.00147771	0	0	0	0	0
355.07	0	7.17018	2.87849	0	0.343497	9.81559	9.13953	7.69027	7.56449	5.75393	5.1777	4.71053	5.85135	8.08975	15.9628	21.3649	20.8709	17.7841	15.2912	14.1709	13.3905	12.193	12.1891	10.1951	10.2986	9.71446	7.52167	5.99362	3.52719	1.5967	0	0	0	0	0	0	0	0	0	0	0	0	0	0.0272164	0	0.0122928	0	0	0
356	0	7.16298	3.72121	0	1.49784	9.53785	9.34584	7.79227	8.11836	5.79132	4.96056	4.63098	5.52082	7.35435	16.4311	21.6953	20.6182	18.2833	15.6297	15.0715	13.6677	13.2414	12.9907	11.4194	11.0681	10.5702	8.46738	7.01978	4.39912	2.29966	0	0	0	0	0	0	0	0	0	0	0	0	0	0	0	0	0	0	0
357.07	0	0	4.63492	0	4.23527	8.63446	9.6676	8.25393	7.96251	6.06843	4.70574	4.54907	5.37836	7.55932	16.6052	21.7831	20.8066	19.0084	16.0036	15.9026	14.1387	14.396	13.6601	12.3253	11.5635	11.3296	9.58101	8.09237	5.6007	2.91905	0	0	0	0	0	0	0	0	0	0	0	0	0	0	0	0	0	0	0
358	0	0	0	0	0	8.75657	10.4933	8.85348	8.02817	6.11768	4.81003	4.79866	5.25856	7.26003	16.8777	21.8463	21.5564	19.6701	17.0223	16.4576	14.6785	15.4499	15.0251	13.6362	12.7378	12.5185	10.8811	9.25231	6.71791	3.70553	0	0	0	0	0	0	0	0	0	0	0	0	0	0	0	0	0	0	0
359.07	0	1.05906	0	0	0	7.88276	10.9747	9.81896	7.67301	5.82292	4.96642	4.5812	5.17312	6.98991	16.975	22.1733	22.0908	20.1809	17.889	17.6501	15.9797	16.4273	16.5797	15.0949	13.7893	13.8802	12.6185	10.391	7.70486	4.72976	0.783605	0	0	0	0	0	0	0	0	0	0	0	0	0	0	0	0	0	0
360	5.3348	1.74988	0	1.76398	0	9.148	11.1477	10.385	8.05565	5.43899	4.97188	4.63093	5.17417	6.70976	17.2146	22.8805	22.6408	20.6789	18.4421	18.8021	17.3328	17.5754	18.0208	16.555	15.3918	15.137	14.2965	11.4302	8.53536	5.55113	2.13866	0	0	0	0	0	0	0	0	0	0	0	0	0	0	0	0	0	0
361.07	0.846922	0	5.89268	3.71341	1.62562	9.36722	11.2907	10.8446	8.28211	5.41672	4.75036	4.64511	5.23371	7.02353	17.0094	23.2525	23.0408	20.8362	18.6813	19.2251	18.2662	18.4506	18.622	18.0819	17.0001	16.5827	15.7218	12.8722	9.65483	6.44934	2.86508	0	0	0	0	0	0	0	0	0	0	0	0	0	0	0	0	0	0
362	0	0	0	3.61204	2.35971	9.86438	11.6589	10.314	8.45445	5.49556	4.52475	4.82223	5.18091	7.10156	17.0605	23.6392	23.815	21.7574	19.6514	19.7892	19.0115	19.4366	19.7168	19.7233	18.6476	18.4387	17.0301	14.1658	10.9157	7.402	3.49979	0	0	0	0	0	0	0	0	0	0	0	0	0	0	0	0	0	0
363.07	0	1.60919	0	0.457693	1.81185	8.89018	11.8852	9.93086	7.51109	5.45258	4.15978	4.32867	4.91547	7.20091	17.6079	24.4417	23.8868	22.3713	20.6048	21.0567	20.196	20.7895	21.3665	20.8887	20.3149	20.0203	18.8455	15.9914	12.2777	8.39083	4.07006	0	0	0	0	0	0	0	0	0	0	0	0	0	0	0	0	0	0
364	9.74238	2.37269	0.721186	2.15765	5.61984	7.68795	12.5623	9.9347	7.25859	5.49226	4.34999	4.01232	4.9184	7.52862	17.8683	25.253	24.3367	23.4679	21.5928	22.7348	21.6314	22.5104	23.2634	22.0239	21.7828	21.6557	20.5922	17.9542	13.3066	9.56102	4.77653	0.821101	0	0	0	0	0	0	0	0	0	0	0	0	0	0	0	0.0180157	0
365.07	6.05141	0	2.22541	0	8.0107	8.56326	13.3941	11.3506	7.91372	5.82872	4.67006	3.97104	5.15502	7.80993	18.4399	25.4041	25.1556	23.6558	22.4118	23.5342	22.5677	23.403	24.448	23.5762	23.972	22.8767	22.2799	19.6316	14.4327	10.6275	5.39647	1.73222	0	0	0	0	0	0	0	0	0	0	0	0	0	0	0	0.0301849	0
366	3.5578	0	1.01133	0	7.89145	11.6327	14.286	12.0401	8.72087	6.14835	4.77608	4.21828	4.98677	8.08117	18.6141	26.3619	25.9937	24.638	23.2434	24.1292	23.443	24.7175	25.6763	25.647	25.5317	24.6759	23.9606	21.1029	16.2103	11.3405	6.4699	2.5562	0	0	0	0	0	0	0	0	0	0	0	0	0	0	0	0	0
367.07	2.39696	0	1.33162	0	4.87064	12.3849	14.6319	11.7783	8.45162	6.11378	4.52311	4.28665	4.69403	7.966	18.9544	26.923	26.3603	25.1688	24.3637	24.7463	24.5009	26.1932	27.0127	27.1675	27.2106	26.2084	25.4699	22.6685	17.6761	12.2804	7.06758	3.17506	0	0	0	0	0	0	0	0	0	0	0	0	0	0	0	0	0
368	1.69086	0	0	4.01865	0	10.2745	15.5692	12.5408	8.48539	5.82438	4.32105	4.41555	4.86905	7.48889	18.8893	27.5203	26.6616	25.8488	25.7584	25.7889	25.8863	27.9926	28.5158	29.0317	28.8534	28.3335	26.7322	24.3463	19.3545	13.853	8.19342	3.75221	0	0	0	0	0	0	0	0	0	0	0	0	0	0	0	0	0
369.07	0	0	0	2.54539	0	10.2422	16.1472	14.2041	8.93707	5.77651	4.42591	4.3016	5.21335	7.42474	19.418	28.0941	27.4903	26.6384	26.7889	26.9876	27.0527	29.3577	29.8321	29.8431	31.5403	30.217	28.806	26.2217	21.0922	15.1458	9.01045	4.01247	1.29617	0	0	0	0	0	0	0	0	0	0	0	0	0	0	0	0
370	4.78553	0	0	2.88495	1.7004	10.7316	17.1001	15.4169	9.71366	5.72435	4.54204	3.99525	5.06307	7.99298	19.7966	28.8091	28.3967	27.4412	27.1938	28.5782	28.0787	30.8685	31.5389	31.188	33.6233	32.6469	31.1075	28.0864	22.933	16.0272	10.0075	4.73922	1.83464	0	0	0	0	0	0	0	0	0	0	0	0	0	0	0	0.0230161
371.07	5.23941	0	0.681554	0	6.86713	11.8679	16.7038	14.4812	10.0549	5.99748	4.75462	4.02213	4.98271	8.01151	20.3642	29.2921	29.455	28.7936	28.2554	30.0948	29.1139	31.9757	33.1318	32.5165	34.8515	35.0334	32.9168	30.1067	24.4336	16.9698	10.7431	5.2431	2.22822	0	0	0	0	0	0	0	0	0	0	0	0	0	0	0	0
372	9.54828	0	0.782181	0	4.07518	14.0462	17.8376	14.2734	10.6246	6.23924	4.71268	4.44269	4.93293	7.759	20.9777	30.0633	29.7426	29.5311	29.4779	31.6673	30.7749	33.6174	34.9198	34.6751	36.3995	36.9927	34.2965	31.3804	25.7559	18.4072	12.0465	6.00129	2.68294	0	0	0	0	0	0	0	0	0	0	0	0	0	0	0	0
373.07	8.54494	0	4.14858	0	2.14958	15.0703	18.7048	15.8188	10.541	6.61395	4.78059	4.40513	4.90254	7.92657	21.409	30.8492	30.459	30.4033	30.6385	32.7267	32.4133	35.2867	36.6279	35.9682	38.3263	38.9578	36.06	32.8511	27.1915	19.9798	12.9672	6.65896	3.24964	0	0	0	0	0	0	0	0	0	0	0	0	0	0	0	0
374	3.68899	0	2.44396	5.37927	0	14.5492	19.1205	16.2557	10.1247	6.49688	4.9069	4.45341	4.80632	8.37253	22.1303	31.2481	31.3786	30.7424	31.9626	33.9328	34.3421	37.2234	38.4751	38.0067	40.6371	40.9527	38.2055	34.0728	28.4778	21.3885	13.9223	7.5607	3.64606	0.823467	0	0	0	0	0	0	0	0	0	0	0	0	0	0	0
375.07	0	5.3242	0.489704	5.32703	1.15376	13.9493	18.7607	17.2264	9.94965	6.70067	4.75702	4.06033	4.88758	8.31499	22.4392	32.2378	32.4399	32.3154	33.4863	35.4884	36.2741	38.23	39.834	40.0181	42.3265	43.0259	40.3499	36.4116	30.8863	22.4398	14.7893	8.05911	4.01018	1.0819	0	0	0	0	0	0	0	0	0	0	0	0	0.0102494	0	0
376	0	8.79178	0	6.81736	1.15184	14.6394	18.9365	17.8819	10.6426	6.5492	4.75735	4.23566	4.98978	8.4812	23.1616	32.8624	32.7426	33.3223	34.0429	36.8541	37.7468	39.4953	41.0976	42.2543	44.6325	45.1765	42.3679	38.0797	32.5485	23.6822	15.6522	8.98436	4.56785	1.86146	0	0	0	0	0	0	0	0	0	0	0	0	0	0	0
377.07	0	3.23372	0.106266	2.40989	2.60956	14.0372	20.3018	18.3382	11.0516	6.4956	4.71984	4.54025	4.90034	8.35507	23.519	33.0111	33.3172	34.522	34.7327	37.8125	38.7428	41.1176	42.7991	43.5814	46.3697	47.0724	44.9276	39.4903	33.8509	25.2058	16.2679	9.71887	5.13104	2.26275	0	0	0	0	0	0	0	0	0	0	0	0	0	0	0
378	0	6.20514	5.70202	5.90007	0	14.8529	22.4086	17.7314	10.5675	6.54052	4.76676	4.59687	5.20031	8.55755	23.6718	33.4069	34.0983	35.2851	36.1367	38.9056	39.97	42.6362	44.9195	44.3794	47.9752	48.5735	47.0818	41.1742	34.9234	26.9644	17.4671	10.3643	5.62509	2.6821	0	0	0	0	0	0	0	0	0	0	0	0	0	0	0
379.07	13.3253	4.12114	9.5772	1.77173	0.0601021	17.6409	22.878	18.8609	10.6551	6.92361	4.63775	4.29885	5.60237	8.55061	23.7076	34.539	35.6605	35.8496	37.3309	40.2242	41.5896	44.6341	46.943	46.2387	49.0939	49.7336	48.2115	43.327	36.9278	28.3996	18.8257	10.8281	6.08628	3.14105	0.344866	0	0	0	0	0	0	0	0	0	0	0	0	0	0
380	19.3024	2.91766	8.61091	3.02381	2.63272	19.3024	22.4032	19.9385	11.47	7.17792	5.00211	4.57023	5.72911	9.01514	24.3494	35.2557	36.8997	35.9692	38.7141	41.3673	42.9932	46.4213	48.2738	48.4855	50.9044	51.5883	49.4998	44.8229	38.8531	30.1117	20.0741	11.9034	7.00433	3.57536	0.944199	0	0	0	0	0	0	0	0	0	0	0	0	0	0
381.07	17.5204	0	2.7805	8.76877	0.882771	19.5114	23.7253	20.5011	12.1199	7.0818	5.43243	4.70431	5.21813	9.00091	25.1331	36.2019	37.2975	37.4154	39.8324	43.4018	44.2636	48.3782	49.7308	50.0455	52.341	53.7019	52.2812	46.8099	39.8002	31.3596	21.4163	13.0128	7.63731	4.21314	1.38009	0	0	0	0	0	0	0	0	0	0	0	0	0	0
382	0	2.1774	0.140827	9.50404	2.73135	19.5167	24.8723	21.0976	11.8482	7.10827	5.57463	4.41628	5.0628	9.18452	25.106	36.9872	37.8861	39.0438	40.4786	45.2048	45.4355	49.6053	51.7168	50.9715	53.5893	56.5023	55.0655	49.2684	40.7404	32.4874	22.5553	13.7473	8.20225	4.84203	1.93461	0	0	0	0	0	0	0	0	0	0	0	0	0	0
383.07	0	1.25729	3.68277	2.43677	6.76908	20.4769	24.6082	22.2038	12.4029	7.28516	5.55945	4.22335	5.36148	8.87272	25.0501	37.4996	38.6711	39.9699	40.605	46.4782	46.9848	50.9737	53.1873	52.2394	55.3507	58.3949	56.9932	51.2859	42.1338	33.3974	23.7861	14.5631	8.63227	5.29944	2.43001	0	0	0	0	0	0	0	0	0	0	0	0	0	0
[truncated: 265 more rows]
[truncated: 22 more columns]

## Sheet: 12 days
Wave	200	205	210	215	220	225	230	235	240	245	250	255	260	265	270	275	280	285	290	295	300	305	310	315	320	325	330	335	340	345	350	355	360	365	370	375	380	385	390	395	400	405	410	415	420	425	430	435	440
[truncated: 397 more rows]
[truncated: 22 more columns]

## Sheet: 15 days
Wave	200	205	210	215	220	225	230	235	240	245	250	255	260	265	270	275	280	285	290	295	300	305	310	315	320	325	330	335	340	345	350	355	360	365	370	375	380	385	390	395	400	405	410	415	420	425	430	435	440
[truncated: 397 more rows]
[truncated: 22 more columns]
