# Supplementary material for: Emergence of visible light optical properties of L-phenylalanine aggregates
Source: PeerJ. 2019 Feb 25;7:e6518. doi: 10.7717/peerj.6518 (PMC6394350; doi:10.7717/peerj.6518)
Supplement: Supplemental Information 6 [file peerj-07-6518-s006.xlsx]

## Sheet: Control
Wave	200	205	210	215	220	225	230	235	240	245	250	255	260	265	270	275	280	285	290	295	300	305	310	315	320	325	330	335	340	345	350	355	360	365	370	375	380	385	390	395	400	405	410	415	420	425	430	435	440
252.03	0	0	0	0	0	0	0	0	0	0	0	0	0	0	0	0	0.0270611	0	0	0	0	0	0.222658	0	0.105209	0.0904627	0	0.248183	0	0.105072	0.12209	0.024497	0.239519	0.132133	0.252441	0.211731	0.259025	0.221062	0.206526	0.210211	0.0538074	0.0912982	0.0038013	0	0.107923	0.0728966	0.0383374	0.078617	0.0636554
252.96	0	0	0	0	0	0	0	0	0	0	0	0	0	0	0	0	0	0	0	0	0	0	0.0922096	0	0.0121747	0.122451	0.0539935	0.00831866	0.0422265	0.236534	0.185686	0.245039	0.212743	0.0468661	0.321866	0.161263	0.249464	0.216006	0.128002	0.112778	0.0983352	0.0969482	0	0.0146751	0.0867409	0.0385255	0.0259894	0	0.0412835
254.06	0	0	0	0	0.796089	0	0	0	0	0	0	0	0	0	0	0	0	0.00776287	0	0	0	0	0.0123566	0	0.154887	0.105379	0.101872	0	0.0661796	0.274198	0.141983	0.234462	0.329093	0.0906287	0.261376	0.207556	0.26488	0.194813	0.189442	0.135192	0.149649	0.00675377	0.034747	0.0327549	0.0573377	0.0310244	0.00957341	0	0.0352743
255	0	0	0	0	0	0	0	0	0	0	0	0	0	0	0	0	0	0	0	0	0	0	0.123426	0	0	0	0.224959	0.0129019	0.228517	0.190543	0.0758914	0.190283	0.336543	0.231651	0.198084	0.210934	0.291779	0.256352	0.243869	0.190282	0.13204	0	0.0499662	0.0290198	0.0182833	0.0621811	0.0157006	0.00103568	0.0690568
255.93	0	0	0	0	0	0	0	0	0	0	0	0	0	0	0	0	0	0.032039	0	0	0	0	0.190423	0.157031	0	0	0.11279	0.236448	0.101946	0.195243	0.183866	0.122443	0.194442	0.203527	0.192707	0.238166	0.161083	0.312899	0.258556	0.207865	0.15882	0.00895877	0.0658345	0	0.0439572	0.0908256	0.0505259	0.0555593	0.0332345
257.03	0	0	0	0	0	0	0	0	0	0	0	0	0	0	0	0	0	0	0	0	0	0	0	0.164271	0	0	0.0644587	0.420596	0.0329478	0.178692	0.32896	0.237504	0.0721821	0.137802	0.24582	0.283844	0.0325017	0.243828	0.224558	0.163376	0.154639	0.114365	0.0486395	0	0.0684664	0.0317143	0.061451	0.0443663	0
257.96	0	2.51491	0	1.00709	0.352007	0	0	0	0	0	0	0	0	0	0	0	0	0	0	0	0	0	0	0.0394096	0	0	0	0.369416	0.0706303	0.130768	0.212848	0.244845	0.115206	0.131063	0.216766	0.231717	0.189855	0.177903	0.218458	0.159568	0.184642	0	0	0	0.076538	0	0.0235384	0	0
259.06	0	0	0	0	0	0	0	0	0	0	0	0	0	0	0	0	0	0	0	0	0	0	0	0	0	0.00676953	0	0.0165745	0.159889	0.116622	0.039283	0.242419	0.156504	0.0912252	0.181006	0.139155	0.33641	0.092777	0.113751	0.114599	0.15491	0	0	0	0.0511957	0.0207628	0.0488431	0	0.000923736
260	0	0	0	0	0	0	0	0	0	0	0	0	0	0	0	0	0	0	0	0	0	0	0	0.0110823	0	0	0	0	0.210244	0.265826	0	0.0983149	0.0706065	0.0415966	0.236943	0.104047	0.302422	0.21253	0.175346	0.179863	0.101955	0	0	0	0.0770767	0.0401365	0.0805099	0.0145117	0.0321379
260.93	0	0	0	0	0	0	0	0	0	0	0	0	0	0	0	0	0	0	0	0	0	0	0	0	0	0	0	0	0.133049	0.278968	0	0.0348934	0	0.0341459	0.299069	0.203277	0.273171	0.111825	0.268517	0.0976624	0.124035	0.0961045	0.102913	0.0239498	0.0697034	0.015847	0.0534968	0.0814432	0.0139925
262.03	0	0	0	0	0	0	0	0	0	0	0	0	0	0	0	0	0	0	0	0	0	0	0	0	0.0263846	0	0	0	0	0.10008	0	0.0805739	0	0.0885214	0.255794	0.194191	0.314677	0.122477	0.305988	0.0189064	0.221338	0.108566	0.142825	0.0269918	0.0453329	0.00696196	0.0333191	0.108983	0.0371735
262.96	0	0	0	0	0	0	0	0	0	0	0	0	0	0	0	0	0	0	0	0	0	0.0305384	0	0	0.0433763	0	0	0	0	0.07085	0	0.213139	0	0.149448	0.165882	0.0484451	0.185186	0.0923682	0.18147	0.0563105	0.173912	0.114169	0.0703886	0.0587807	0	0	0.00418314	0.0459962	0.0410349
264.06	0	0	0	0	0	0	0	0	0	0	0	0	0	0	0	0	0	0	0	0	0	0	0	0.0333456	0	0	0	0.0520265	0	0.0561584	0.0400137	0.205681	0.0785799	0.110975	0.132629	0.0599036	0.101555	0.141392	0.173933	0.195566	0.113364	0.113662	0	0	0.00748256	0.00215007	0.0105954	0.0130741	0.0528674
265	0	0	0	0	0	0	0.224858	0	0	0	1.08089	0	0	0	0	0	0	0	0	0	0.054223	0	0	0	0	0	0	0.0281512	0.11274	0	0.0866348	0.196227	0.160307	0.0729152	0.152566	0.248	0.145413	0.135903	0.12425	0.275384	0.0890106	0.061262	0	0	0.0326239	0	0.00527908	0	0.0169032
265.93	0	0	0	0	0.586062	0.160379	1.78477	2.10985	0	0.809507	3.18763	0	0	0	0	0	0	0	0	0	0	0	0	0	0	0	0	0	0.0795246	0	0.0838455	0.116662	0.137092	0	0.207903	0.315885	0.179343	0.160106	0.0901332	0.205965	0.0756085	0.0632963	0.00542905	0	0.034788	0.0107992	0.0208914	0	0.0742666
267.03	0	0	0	1.47018	2.29873	2.81476	4.01901	4.88603	4.20857	4.80286	6.39849	4.57299	0	0	0	0	0	0	0	0	0	0.00923673	0	0	0	0.080774	0.00402682	0	0.0609334	0	0.127874	0.0423913	0.114537	0.00101265	0.252406	0.267277	0.0832735	0.218066	0.114927	0.118515	0.0668351	0.0628785	0.0336097	0	0.00514877	0.0447816	0.0361413	0	0.076013
267.96	0	0	0	0	2.92913	5.41519	6.86818	9.00494	10.5994	10.9445	11.7006	13.4839	0	0	0	0	0	0	0	0	0	0	0	0	0.185484	0.293143	0.113971	0.00479429	0	0	0.15013	0.0105236	0.0776828	0.0489903	0.231179	0.0646071	0	0.196589	0.167257	0.0394507	0.162077	0.0380456	0.00712586	0	0.0548917	0.0448861	0.0127706	0.0313906	0.0317929
269.06	0	0	0	0	5.60033	8.05725	9.09054	13.6144	18.1541	18.9966	18.3604	21.9326	0	0	0	0	0	0	0	0	0	0	0	0.112245	0	0.0166011	0.0230834	0	0	0	0.174631	0.0513503	0.025932	0.00759366	0.15683	0.0320543	0.0413729	0.142908	0.112266	0.0275879	0.174965	0.0190891	0	0.0105079	0.055338	0.0225297	0.0188205	0.00522501	0
270	0	0	0	0	8.94651	10.2489	12.4759	19.2007	29.1331	28.0207	27.4201	32.3957	12.4978	0	0	0	0	0	0	0	0	0	0	0.0749528	0.0798827	0	0	0	0	0	0.252937	0.0183694	0	0	0.119128	0.0689608	0.0998476	0.110453	0.0866139	0.12478	0.0897076	0	0	0.0353323	0.0302409	0.00987071	0	0.0304502	0.0245855
270.93	0	0	1.38211	4.53622	12.8003	14.1189	17.8865	27.2911	41.3205	40.4012	39.285	45.2998	36.8641	0	0	0	0	0	0	0	0	0	0	0.0371339	0.174025	0	0.0914793	0	0	0	0.134568	0	0.0907209	0.00789877	0.159328	0.171082	0.133052	0.0178956	0.169991	0.133517	0.0355658	0	0	0	0.028	0.0226252	0	0.0162144	0.0294036
272.03	0	6.6591	1.1105	10.5287	19.2544	19.2313	23.2036	37.3066	54.0994	55.5542	52.3735	59.3994	57.4092	0	0	0	0	0	0	0	0	0	0	0.0107065	0.370977	0.133359	0.164721	0	0	0	0.0202399	0	0.124923	0.112356	0.142174	0.0744556	0.10352	0.0476576	0.262411	0.054862	0.0860475	0.00154793	0	0	0.0420474	0.0289894	0	0.0040599	0.0164818
272.96	0	11.7216	10.1547	14.3432	22.1947	24.8245	27.9363	44.9898	67.4745	71.539	65.8971	72.2415	74.8587	0	0	0	0	0	0	0	0	0	0	0	0.31725	0.182308	0.31853	0.248981	0.0186821	0	0	0.052853	0.0883478	0.187007	0.112297	0.0591129	0.152112	0.0786116	0.266608	0.00426805	0.0445386	0.0940773	0.0207335	0.0106153	0.0287391	0.00811645	0.00926408	0	0
274.06	4.99569	10.7589	16.0605	12.8133	25.7569	28.387	31.8562	50.405	78.5437	81.4838	76.9675	82.532	87.6427	18.9024	0	0	0	0	0	0	0	0	0	0	0.121344	0	0.288567	0.313496	0.204558	0.119817	0	0.108895	0.0595526	0.221588	0.0703117	0.0292173	0.191457	0.106032	0.263608	0	0	0.0159596	0.0305011	0.0784933	0.0348984	0.030593	0.0346508	0.0307847	0
275	7.34134	8.85849	19.5951	19.4888	28.0253	31.1071	36.71	56.685	87.7082	90.9277	87.7141	91.007	99.9282	56.4614	0	0	0	0	0	0	0	0	0.00811034	0	0.277027	0	0.276578	0.202961	0.198394	0	0.101662	0.126461	0.138827	0.235358	0.0517667	0.0279024	0.14635	0.10334	0.190837	0.0366128	0	0.000576437	0	0.0314729	4.62631e-05	0.0301743	0.0064342	0.0161845	0.0161529
275.93	16.8883	11.9668	22.4988	22.3378	31.692	33.2274	40.8068	62.9674	95.8859	101.191	96.7022	100.65	110.135	79.0941	0	0	0	0	0	0	0	0	0.0430808	0	0.331126	0.035844	0.16033	0.256088	0.292766	0	0.150868	0.0068051	0.122785	0.260482	0.177381	0	0.155631	0.145677	0.118097	0.0290079	0.166508	0.0103042	0	0	0	0.0198504	0.00907884	0	0.034167
277.03	0	13.2042	30.928	29.2032	33.0538	37.1261	44.3231	69.7063	104.964	111.371	105.535	111.532	120.993	96.1149	0	0	0	0	0	0	0	0	0.0413706	0	0.37883	0.0147788	0.438585	0.38337	0.152074	0	0.0805497	0.0375455	0.0640388	0.293383	0.219663	0.0832354	0.185673	0.191708	0.0947129	0.0378634	0.195566	0.0757339	0	0.00238491	0	0.00461042	0.0117673	0.00116223	0.00277873
277.96	6.87517	22.5296	33.0161	38.9556	36.3179	42.2932	48.6681	75.7941	111.743	119.39	115.489	122.275	131.084	108.245	0	0	0	0	0	0	0	0	0.104368	0	0.185337	0	0.494079	0.376096	0.142903	0.141839	0.110286	0	0.132639	0.228861	0.167824	0.17106	0.143671	0.174607	0.180968	0.0360648	0.180613	0	0	0.0715046	0.0573165	0.0163132	0.0583045	0.0149335	0
279.06	15.8164	22.4512	25.4855	46.6962	40.9633	47.6872	53.0356	81.2315	120.295	128.91	125.7	130.97	140.227	116.777	23.8342	0	0	0	0	0	0	0	0.0184845	0.189431	0.279242	0.236367	0.262817	0.385557	0.0986346	0.117043	0.163199	0.165856	0.155262	0.113844	0.085069	0.24419	0.134863	0.177837	0.213871	0.072473	0.107355	0	0	0.0305283	0.0184937	0	0.049524	0.00934902	0
280	29.271	25.4158	30.8261	51.861	46.2307	52.542	58.764	85.7732	130.817	138.843	135.732	138.498	147.612	124.348	57.0181	0	0	0	0	0	0	0	0.0785863	0.240991	0.260951	0.614848	0.223708	0.439822	0.185937	0.0943452	0.122729	0.125836	0.121461	0.0104723	0.290513	0.251653	0.229161	0.166256	0.212169	0.0710981	0.0471931	0	0	0	0.00562916	0.0015613	0.0306618	0.014628	0
280.93	29.5984	24.0877	38.3741	48.4898	52.2663	54.1945	63.2081	90.0369	137.655	145.676	142.082	146.387	153.393	131.543	75.4693	0	0	0	0	0	0	0	0.0385818	0.166662	0.287633	0.495571	0.398455	0.440717	0.218801	0.136816	0	0.137193	0.103425	0.046534	0.323057	0.201326	0.286039	0.189356	0.176041	0.0410781	0.0423173	0	0	0	0	0.00823803	0.0368489	0.0166819	0
282.03	22.8171	25.9365	36.5689	54.6934	54.9138	55.3797	65.9957	93.946	139.303	150.547	147.402	150.472	159.228	137.122	90.3942	0	0	0	0	0	0	0	0.0980256	0.0349937	0.357171	0.136947	0.447445	0.298037	0.327268	0.38233	0.178468	0.0956046	0.221051	0.0973424	0.212071	0.186034	0.310651	0.239182	0.158475	0.155368	0.109331	0	0	0	0.0186504	0.0353847	0.0570865	0.0462784	0
282.96	20.367	18.5431	36.0071	49.5724	55.3185	58.3032	66.7656	95.9821	141.723	152.797	148.282	153.588	162.744	140.894	98.7326	0	0	0	0	0	0	0	0	0	0.212981	0.229932	0.396794	0.15556	0.195909	0.34704	0.407046	0.215438	0.225493	0.108943	0.175138	0.234527	0.147047	0.137383	0.0633028	0.210261	0.140449	0.056292	0	0.0194527	0.0354109	0.0188753	0.0174839	0.03786	0
284.06	15.4208	23.5584	42.8025	50.3971	55.445	63.3144	69.2437	97.175	144.427	152.884	150.122	154.129	164.357	143.404	104.906	6.31236	0	0	0	0	0	0	0	0.0276462	0.0388455	0.218018	0.486508	0.305358	0.0958856	0.136182	0.470222	0.164815	0.110796	0.189831	0.151483	0.270768	0.12575	0.153431	0.0500263	0.150559	0.0771259	0.055626	0	0.0711062	0.0490095	0.0199336	0.00747342	0	0.00744445
285	19.255	34.299	45.4257	45.7341	56.2433	68.0707	73.464	98.6246	145.671	153.304	150.802	156.094	164.356	145.964	111.83	40.1619	0	0	0	0	0	0	0	0	0.0730348	0.167981	0.552595	0.317319	0.269131	0.0881462	0.2316	0.0850384	0	0.174727	0.0839976	0.209041	0.114845	0.154053	0.14876	0.0552112	0.125132	0.0201887	0	0.0253848	0.0257172	0.0235547	0.00882271	0	0
285.93	18.7405	33.9301	33.1403	51.5116	57.5404	73.6501	76.139	101.923	146.172	156.736	152.668	157.235	166.079	148.926	120.912	63.0912	0	0	0	0	0	0	0	0	0.196772	0.251898	0.387094	0.298686	0.333265	0.160797	0.207171	0.278149	0	0.173835	0	0.177507	0.36483	0.193208	0.271727	0.112418	0.0887094	0.0255473	0	0.00329449	0.0332601	0.0531685	0.0672049	0	0
287.03	23.0578	28.8721	30.0336	53.9841	63.9285	79.36	80.9552	104.783	147.153	160.284	154.057	163.192	169.467	153.408	128.97	81.1083	0	0	0	0	0	0	0	0	0.048406	0.345951	0.355225	0.285663	0.282126	0.248676	0.353052	0.453759	0.151611	0.0797435	0.0905663	0.180651	0.342299	0.0890309	0.216525	0.169702	0.115563	0.0143152	0	0	0.0324443	0.0584368	0.0723592	0.00608451	0
287.96	22.8128	30.8874	29.366	53.7554	72.5643	85.6998	86.7234	106.651	149.874	162.084	156.869	166.821	174.869	158.981	138.051	97.1617	0	0	0	0	0	0	0	0	0.0315241	0.0535909	0.257029	0.565608	0.0793365	0.240137	0.367366	0.455604	0.244952	0.138778	0.0829425	0.274955	0.250948	0.130559	0.127606	0.150017	0.0780768	0.00543334	0	0	0.0371948	0.0362871	0.0488639	0.0104504	0.00704918
289.06	14.4671	34.7223	36.6406	52.2102	76.5556	88.5564	91.1388	107.497	151.897	160.798	157.98	167.192	177.709	162.01	145.409	110.019	4.39937	0	0	0	0	0	0	0	0.0706138	0	0.579969	0.44621	0.191149	0.305302	0.289399	0.367231	0.161307	0.130222	0.239163	0.271992	0.132026	0.154477	0.0988274	0.0570805	0.0832142	0.00634193	0	0.0242893	0.0222012	0.046027	0.0216314	0.0293408	0.00265353
290	13.6962	30.6658	39.4783	55.207	75.2127	92.7358	93.365	107.79	149.941	158.97	158.195	164.776	177.182	164.026	151.912	121.976	49.6595	0	0	0	0	0	0	0	0.141168	0.0710613	0.583038	0.521296	0.293344	0.415473	0.37933	0.335594	0.159432	0.229154	0.281711	0.19172	0.192339	0.162474	0.0853671	0.0820381	0.0593083	0.00937633	0	0.0438497	0.0206976	0.0339313	0.00325045	0.0145387	0
290.93	24.0677	35.3575	42.5656	56.2436	73.1156	96.8921	96.6906	108.093	145.707	156.529	154.578	163.166	175.453	164.98	155.991	131.279	76.2795	0	0	0	0	0	0	0	0.113787	0.294425	0.499115	0.434386	0.489994	0.367805	0.509078	0.249548	0.287121	0.271205	0.28226	0.0935284	0.303056	0.154231	0.127816	0.153709	0.0990261	0	0	0	0.0383112	0.0565016	0.010442	0	0.029708
292.03	26.3894	46.1427	38.1548	52.0889	75.4282	103.165	100.234	108.842	144.325	153.718	149.024	159.773	173.441	164.105	161.252	140.456	96.9422	0	0	0	0	0	0	0	0.201964	0.0866997	0.237231	0.37178	0.477605	0.425768	0.472417	0.165685	0.332411	0.253647	0.156812	0.179676	0.188391	0.147913	0.154793	0.193719	0.110116	0	0	0	0.0666972	0.0595598	0.0604047	0	0.0696176
292.96	25.4085	51.7178	31.4134	46.9244	78.655	105.625	102.343	108.69	140.473	148.009	143.515	155.158	168.579	161.354	166.031	149.301	108.404	0	0	0	0	0	0	0	0	0.0945006	0.455369	0.0706905	0.427498	0.407184	0.456506	0.213137	0.218168	0.278733	0.29094	0.237347	0.129029	0.219112	0.23676	0.142027	0.0658376	0	0	0	0.0199067	0.0459655	0.0522793	0	0.0291799
294.06	28.102	43.7792	32.1725	45.7787	79.6304	106.355	104.852	107.851	135.264	143.466	140.404	151.584	163.302	159.519	170.982	157.655	117.922	5.59524	0	0	0	0	0	0	0	0.100404	0.364414	0.101025	0.367569	0.478706	0.275966	0.128123	0.290106	0.359081	0.235713	0.258882	0.121084	0.174828	0.183451	0.108826	0	0	0	0.00433966	0.0120835	0.00652566	0	0.01618	0.0251343
295	26.5228	39.9058	35.8649	41.7299	78.8679	109.042	107.386	107.435	132.23	140.393	137.25	147.453	160.109	159.27	175.437	166.154	125.291	39.7184	0	0	0	0	0	0	0	0.128776	0.2572	0.0338578	0.186144	0.386929	0.10645	0.155139	0.233234	0.353319	0.160736	0.220253	0.24506	0.158696	0.166085	0.0680653	0	0	0	0.0369764	0.02441	0.00794188	0	0.0185786	0.0389706
295.93	21.1149	39.9423	37.0457	39.3397	82.1924	110.943	106.969	106.173	130.927	137.341	133.646	144.026	156.414	157.969	180.665	173.261	133.285	58.0102	0	0	0	0	0	0	0	0.0122766	0.342271	0.17203	0.257373	0.384263	0.145316	0.0152283	0.0999401	0.341718	0.0281449	0.125626	0.130888	0.144131	0.119088	0.00856275	0.0342761	0.0428232	0	0.0147952	0.0557103	0.0324987	0.00921186	0.00380911	0.0479122
297.03	25.7369	35.8405	35.2188	40.1118	81.3327	114.513	106.364	103.175	126.911	133.145	130.567	138.073	152.247	156.635	183.44	182.14	140.355	70.1832	0	0	0	0	0	0	0	0	0.352619	0.0933817	0.319313	0.178124	0.362291	0.177644	0	0.289984	0.114608	0	0.0516778	0.135942	0.162867	0.0414653	0.0846503	0.0772214	0	0	0.0583122	0.0308441	0	0	0
297.96	24.7565	31.4676	39.9154	41.7853	80.6725	115.564	107.725	100.844	122.571	128.548	126.152	134.853	148.289	155.249	184.393	187.718	146.386	76.6205	0	0	0	0	0	0	0	0	0.0378142	0.186099	0.448707	0.239304	0.202227	0.223815	0.160914	0.250148	0.161413	0	0.062715	0.0835343	0.177217	0.164613	0.129873	0	0	0	0.0446793	0.0193091	0.0126749	0.0540873	0
299.06	16.747	25.4675	37.48	44.0798	83.5689	118.23	109.311	99.7339	119.006	123.38	122.222	130.479	144.936	153.848	184.639	192.418	149.605	80.0259	0	0	0	0	0	0	0	0	0	0.0752956	0.201183	0.364061	0.0484593	0.4342	0.185264	0.0714854	0.189978	0.0596836	0.198625	0.164409	0.144821	0.199434	0.112481	0	0	0	0.0358776	0.0236866	0.0363528	0.0490462	0
300	15.098	30.7676	35.6118	43.5082	89.4142	117.653	108.682	99.5158	116.137	119.184	116.222	127.371	140.931	150.913	185.608	193.434	153.365	83.2422	0	0	0	0	0	0	0	0	0.0701441	0.189665	0.0826792	0.527964	0.140438	0.295439	0.229087	0.198727	0.147272	0.244787	0.218334	0.192085	0.125159	0.106236	0.0831288	0	0	0.0253214	0.000163145	0.0201792	0.0275516	0	0.00298672
301.07	21.0261	34.475	38.5395	39.3512	92.3434	119.94	109.624	96.6074	112.496	115.514	111.18	122.412	136.587	147.884	186.52	195.499	157.028	85.0605	11.3976	0	0	0	0	0	0	0	0.202015	0.341474	0.0414501	0.413851	0.345451	0.31307	0.22907	0.3017	0.135978	0.206127	0.18394	0.104721	0.0471421	0.0445626	0.0128296	0	0	0	0	0	0.00436536	0	0
302	20.2938	33.3032	40.3544	42.3825	88.7808	119.712	111.812	95.0536	107.812	111.146	105.692	118.247	131.286	144.886	185.502	197.726	159.099	86.9438	22.2563	0	0	0	0	0	0	0	0.189595	0.35983	0.124672	0.29627	0.402649	0.198693	0.338168	0.313598	0.157125	0.102907	0.0560511	0.0370052	0.0106298	0.0567039	0	0	0	0	0	0	0.0444021	0	0
303.07	17.9835	27.6217	28.7495	50.1957	86.2799	120.596	111.555	92.0465	103.313	106.055	102.086	113.358	125.271	140.694	184.083	200.104	160.635	88.2641	25.2872	0	0	0	0	0	0	0	0.128494	0.429035	0.33764	0.325209	0.343221	0.270839	0.311992	0.306369	0.115338	0.153955	0.0223669	0.188816	0.0778199	0.058139	0	0	0	0	0.00861937	0	0.0165007	0	0
304	17.9073	27.1713	24.8316	53.1109	85.156	122.425	108.901	90.7011	99.9827	102.048	99.0606	108.818	120.773	137.226	182.163	198.843	160.748	89.0545	25.6972	0	0	0	0	0	0	0	0.288433	0.423793	0.420286	0.383735	0.383856	0.208347	0.273017	0.290294	0.104025	0.264506	0.0908757	0.212658	0.116623	0.0227366	0	0	0	0	0.0273125	0.0137121	0.0113979	0.0138269	0
305.07	18.4953	28.2846	20.6376	46.0156	85.8715	123.172	107.975	88.5991	95.9391	99.233	96.6154	104.079	116.62	133.223	180.391	197.539	160.512	89.0455	26.2206	0	0	0	0	0	0	0	0.181753	0.469414	0.395567	0.440604	0.428965	0.201233	0.289266	0.259962	0.162456	0.202797	0.212248	0.122348	0.111875	0	0.0068533	0	0	0	0.0305131	0.0258738	0.00504936	0.0339698	0
306	12.3302	29.6372	23.3914	43.1552	83.8332	118.554	106.321	87.6202	91.3846	95.6802	93.1169	99.1982	113.139	130.742	178.252	197.16	159.001	88.4986	26.9305	0	0	0	0	0	0	0	0	0.123178	0.0536519	0.208236	0.291775	0.128627	0.214678	0.238442	0.206182	0.141806	0.188612	0.0820441	0.141363	0	0.0324038	0	0	0.0244133	0.0400138	0.0209782	0.0442975	0.0782447	0
307.07	15.3915	24.8825	30.9274	42.4868	82.8069	113.009	103.86	84.745	88.4042	91.5538	88.9219	94.7828	108.923	127.211	176.26	196.415	158.803	87.5345	27.7158	0.497426	0	0	0	0	0	0	0	0	0.102283	0.165706	0.323433	0.19059	0.270476	0.266223	0.11037	0.23661	0.0996723	0.192676	0.170555	0.0401028	0	0	0	0	0.0344892	0.00444539	0	0.083999	0.00696253
308	23.4331	25.2271	37.8006	42.7023	80.7775	112.817	100.318	82.0406	84.6705	85.9941	84.8461	91.8878	105.417	123.241	174.764	193.111	157.511	86.5792	27.63	2.67627	0	0	0	0	0	0	0	0	0.216129	0	0.265041	0.163423	0.188132	0.16061	0.16086	0.231114	0.138012	0.185392	0.123582	0.0938421	0	0	0	0	0.0536097	0	0	0.0666379	0
309.07	30.6171	24.977	26.7249	40.0447	81.811	111.939	98.4361	79.654	81.8755	83.5699	82.0684	89.5835	102.497	119.316	171.558	189.934	156.777	86.1318	27.1328	3.26408	0	0	0	0	0	0	0	0.0523271	0.187138	0.102385	0.145237	0.10567	0.224198	0.0961435	0.197686	0.0921308	0.199162	0.133381	0.107127	0.105406	0	0	0	0	0.041997	0.0368966	0.0184059	0	0
310	25.8536	19.1817	14.1662	36.5193	77.5829	107.974	97.4198	79.0202	79.0928	81.1713	79.8742	87.1238	100.343	116.216	169.132	186.525	154.138	85.4866	26.9628	3.87462	0	0	0	0	0	0	0	0.181652	0	0.117464	0	0.11648	0.184773	0.22181	0.178736	0.139175	0.216866	0.0660677	0.0914675	0.0854609	0	0.0179451	0	0.0353175	0.0168796	0.0132822	0.0300508	0	0
310.93	15.6905	15.5633	12.325	30.9481	73.7937	104.149	96.3802	76.9774	77.7262	77.9557	76.9201	84.7055	96.5529	114.769	165.236	185.639	151.234	83.9411	26.9344	4.22014	0	0	0	0	0	0	0	0	0	0.117764	0.139345	0.133028	0.209347	0.263259	0.108206	0.208825	0.109684	0.0492191	0.0112306	0.0583232	0	0	0	0.05803	0	0.0148108	0	0	0
312.03	7.44743	17.277	17.3599	26.53	67.395	101.911	94.5053	74.5158	74.5144	74.3186	73.1064	82.2437	92.8367	111.671	160.873	182.93	148.112	81.9799	26.8504	4.15387	0	0	0	0	0	0	0	0	0	0.0324151	0.175778	0.28291	0.137102	0.295176	0.16342	0.130774	0.0697026	0.0992687	0	0.0579385	0	0	0	0.0315023	0.00125499	0.000237646	0	0	0.00805969
312.96	3.45917	19.1898	14.1481	25.4274	66.3941	98.0411	91.8102	70.5393	72.1674	71.993	70.4029	78.2728	88.9022	108.21	155.67	177.701	145.469	79.9362	26.2498	4.26496	0	0	0	0	0	0	0	0	0	0	0.0897314	0.303525	0.0215767	0.258888	0.12067	0.0347711	0.0310536	0.180793	0.0377162	0.0439025	0	0	0	0	0.0150795	0.0762664	0.0201354	0	0.0263269
314.06	11.0988	15.4158	11.3669	29.8509	64.6277	96.7519	91.0773	68.6014	69.9682	70.6477	68.0126	73.9229	85.87	103.283	153.662	172.631	142.795	77.8226	25.678	4.70944	0.227638	0	0	0	0	0	0	0	0	0.0793853	0.0665505	0.25358	0.0610515	0.184931	0.0254491	0.0590609	0.170928	0.165647	0.103547	0.0174799	0	0	0	0	0.02138	0.076468	0.021366	0.00464698	0
315	17.8252	22.9343	11.6118	25.399	65.2644	94.8287	87.9976	66.4825	68.235	68.4399	65.3261	71.4276	83.0829	100.243	150.905	169.835	139.626	76.5588	25.238	5.04522	0.836886	0	0	0	0	0	0	0	0	0.234051	0.305042	0.0996152	0.0223245	0.108067	0.0559963	0.114545	0.147353	0.0834235	0.152304	0.0899343	0	0	0	0	0	0.0322277	0.0147586	0.0137575	0
315.93	18.3744	21.4242	19.9993	18.9774	63.3418	93.9934	84.2145	64.6184	65.5904	66.2819	63.4077	69.3355	80.0179	96.9944	145.764	166.745	136.727	74.5636	25.0616	5.16979	1.07579	0	0	0	0	0	0	0	0	0.305124	0.25715	0.0986338	0.115924	0.123179	0.121298	0.0608139	0.131344	0.0625953	0.117733	0.158875	0	0	0	0	0	0	0.0409448	0.0197255	0
317.03	4.89447	14.3757	25.4034	19.7263	59.5134	87.8181	80.7509	62.059	62.2068	63.0313	61.4558	66.4922	76.4865	94.1581	139.785	161.175	132.61	72.9801	24.3577	5.52233	1.30981	0	0	0	0	0	0	0	0	0.0488209	0.0179877	0.230552	0.0767325	0.255148	0.210954	0.116384	0.125857	0.121705	0.160147	0.0973683	0	0	0	0	0	0.0307534	0.0198895	0.0283428	0
317.96	4.13957	8.40165	26.6877	27.0598	59.4088	85.3837	76.7225	58.7622	59.5546	60.7078	58.1884	63.2776	72.9804	90.25	134.768	156.267	128.978	71.4739	23.1608	5.81738	1.85339	0	0	0	0	0	0	0	0	0	0	0.293882	0.106894	0.317469	0.190596	0.154282	0.163738	0.171015	0.204326	0.0590208	0	0	0	0	0.00156543	0.0189035	0.0245632	0.0103274	0
319.06	9.485	12.5199	24.4993	25.2065	58.3856	81.344	74.498	56.0337	58.0909	58.8476	55.7604	61.1335	70.853	86.4555	131.102	150.45	125.536	69.2399	22.1707	5.88363	2.08787	0	0	0	0	0	0	0	0	0	0.0457949	0.205642	0.0380841	0.223899	0.177798	0.17226	0.133573	0.145289	0.129267	0.0772375	0	0	0	0	0	0	0.00989388	0.0135643	0
320	18.5494	13.5498	18.8281	16.5354	55.5542	79.2005	73.2568	53.6708	56.8777	57.3901	54.2447	59.5764	68.4468	83.073	126.341	146.396	121.553	67.7276	21.7616	5.65202	2.33229	0.557315	0	0	0	0	0	0	0	0	0.23713	0.127702	0.108434	0.0798512	0.126207	0	0.128442	0.0764025	0	0.0240905	0	0	0	0	0.0220319	0	0.0144107	0.0168959	0
320.93	10.7096	18.1891	14.437	15.4636	50.7127	74.3353	70.5193	52.6117	54.3066	54.8245	52.5798	57.8631	65.8679	80.7792	122.077	141.17	118.038	67.1455	21.9822	5.68883	2.68439	0.993305	0	0	0	0	0	0	0	0	0.0844162	0.135128	0.0427095	0.0538241	0.0938499	0	0.171012	0.013499	0.0416486	0.0179608	0	0	0	0	0.00322276	0.0107155	0	0	0.0146401
322.03	5.72561	16.4541	12.0705	13.6656	48.9068	71.6071	64.1598	50.5681	51.3214	52.6396	49.8844	55.2301	62.919	77.7718	116.463	136.429	114.644	65.943	21.777	5.89228	3.31552	1.34551	0	0	0	0	0	0	0	0	0	0.0391832	0	0.147623	0.031297	0.0388682	0.152048	0.00612437	0.101848	0.0458784	0	0	0	0	0	0.0179935	0	0	0.0547856
322.96	0	12.2516	13.2201	10.8178	45.3241	67.395	59.7828	48.5963	48.8939	50.7626	48.1859	52.9517	59.8597	73.9067	112.35	129.033	111.247	63.0622	21.6189	5.85525	3.71111	1.61745	0	0	0	0	0	0	0	0	0	0	0.0013291	0.125455	0.0361607	0.0543413	0.157161	0.0470052	0.206227	0.0548683	0.0157553	0	0	0	0	0.01631	0.0144995	0	0.0244099
324.06	0.859944	4.04232	18.5828	2.05615	40.6263	62.9505	58.2287	47.2706	47.1118	48.8218	46.1601	50.9107	57.5538	70.5563	107.663	125.37	106.431	61.35	21.5998	5.77083	3.90324	2.03556	0.333761	0	0	0	0	0	0	0	0	0	0.091582	0	0.11611	0	0.0758193	0.100558	0.065383	0	0.01301	0	0	0	0.00385813	0.00266216	0.0365879	0	0
325	4.72776	4.2978	18.274	8.6359	36.7547	58.63	56.1778	45.7587	46.3726	46.8577	44.774	48.6777	55.5356	68.0294	104.819	121.991	102.314	60.1647	21.6113	5.91985	3.98162	2.55108	0.996866	0	0	0	0	0	0	0	0	0	0	0	0.165243	0	0.0246039	0.104273	0	0	0	0	0	0	0.0357816	0	0.0321177	0	0.00157629
325.93	0	7.07538	13.1291	14.6676	32.6214	55.8219	53.3792	43.4231	44.816	45.3338	43.111	46.59	53.5693	66.3305	100.603	118.254	98.9916	58.5461	21.8476	6.39319	4.3055	3.12804	1.33903	0	0	0	0	0	0	0	0	0	0	0	0.140711	0.100635	0.104962	0.0612664	0	0	0	0	0	0	0.0201299	0	0	0	0.00685147
327.03	0	9.20965	4.05622	23.7933	29.5855	52.6333	49.9911	40.8128	42.8356	43.9626	41.5873	44.9517	50.9852	64.4561	97.2423	111.957	96.1302	56.8962	21.9524	6.97068	4.72632	3.47325	1.77522	0	0	0	0	0	0	0	0	0	0	0	0.133407	0.0639155	0.241941	0.0851803	0	0.0620439	0	0	0	0	0.0129206	0	0	0	0.00345434
327.96	3.93089	7.95907	4.15219	16.0734	30.4418	50.1367	47.0607	39.464	40.3095	42.7772	39.359	42.9697	49.5294	60.7036	92.6137	107.087	92.3579	55.8401	22.4741	7.7114	5.03337	3.93045	2.35927	0	0	0	0	0	0	0	0	0	0	0	0.185201	0.097378	0.124259	0	0.0498463	0	0	0	0	0	0	0.0151939	0	0	0
329.06	17.5287	8.42174	1.66381	10.1897	34.5834	47.7464	46.1934	38.6972	38.9632	40.9646	38.1302	41.3985	47.8089	57.222	89.5249	103.247	88.5079	54.7227	22.2991	8.53106	5.25095	4.38676	2.81944	0.722209	0	0	0	0	0	0	0	0	0.00363233	0	0.124537	0.0344395	0	0.00191353	0.0226062	0	0	0	0	0	0	0	0	0	0.00658371
330	8.30183	7.22586	5.26491	5.97674	30.3682	46.1721	45.2805	37.3895	37.7009	38.446	36.7985	39.9009	46.06	55.1011	86.1728	99.7819	86.1172	53.7577	22.6384	9.20043	5.51074	5.00247	3.16081	1.09788	0	0	0	0	0	0	0	0	0	0.0278351	0.0259906	0.00775693	0	0	0.10265	0.00700182	0	0	0	0	0	0	0	0	0.00819048
331.07	0	2.21785	6.32893	9.77521	24.5076	44.1841	43.2174	35.3258	36.8927	36.3441	35.4546	38.3756	44.079	53.6162	83.4107	97.4993	84.2831	52.2727	22.7744	9.38288	6.1124	5.32755	3.77431	1.72102	0	0	0	0	0	0	0	0	0	0.049513	0	0	0.0641316	0.015475	0.142794	0.0163183	0	0	0	0	0	0	0	0	0.00453331
332	0	0	4.88089	8.34312	22.2681	41.1877	39.4036	33.3614	35.5429	35.3399	33.4684	36.1082	42.4009	51.3352	78.7791	93.488	81.0185	51.1207	23.5005	10.1781	6.60884	5.62801	4.69457	2.24465	0	0	0	0	0	0	0	0	0	0.0216514	0.0848309	0.0333437	0.123474	0	0.0572105	0	0	0	0	0	0	0	0	0	0
333.07	0	0	1.00243	8.16233	21.2254	37.4698	37.5845	32.5547	34.0558	33.9236	31.9718	35.0057	40.1302	49.4794	75.3979	89.4854	77.4988	50.2186	23.7696	11.5434	7.03079	6.08026	5.42045	3.0871	0.0930314	0	0	0	0	0	0	0	0	0	0.0606741	0.0627848	0.0459267	0.00184264	0	0.00711583	0	0	0	0	0	0	0	0	0
334	3.84625	0	4.28828	3.65957	15.555	34.7703	35.8432	31.3752	32.7946	32.9781	30.2821	33.9298	37.7635	47.5262	73.0945	85.5012	75.1051	49.3852	24.391	13.241	8.04676	6.87484	5.70694	3.80716	1.53729	0	0	0	0	0	0	0	0	0	0.087274	0.153064	0	0.0117342	0.00892473	0	0	0	0	0	0	0	0	0	0
335.07	9.98422	4.3228	3.18246	0.319919	13.4591	32.8608	32.8803	30.0574	31.9199	32.1708	29.5641	32.7943	35.8334	45.8139	71.3996	83.993	74.253	48.3764	24.8346	14.0977	9.42223	7.43127	6.29743	4.58235	2.05471	0	0	0	0	0	0	0	0	0	0.0271177	0.0414636	0.00310355	0.0794415	0.0611952	0	0	0	0	0	0	0	0	0	0
336	12.9593	10.4156	0.767445	0.803923	17.6208	31.6264	29.8762	28.9921	30.6347	31.5847	28.7143	31.0448	34.5958	44.1236	68.4097	81.3903	72.1332	47.3298	25.9702	15.2032	10.5005	7.67227	7.1465	5.04686	2.83234	0	0	0	0	0	0	0	0	0	0	0	0.0764918	0.0927971	0.0300478	0	0	0	0	0	0	0	0	0	0
337.07	12.4036	8.24758	0.470544	4.42925	17.4964	30.1216	29.199	28.7608	29.2173	30.3352	27.7265	29.5121	33.909	42.1159	66.1715	78.2282	69.7628	47.0055	26.7708	16.1138	11.3974	8.43524	8.04889	5.79733	3.51068	0	0	0	0	0	0	0	0	0	0	0	0.0467098	0.0594403	0.071589	0	0	0	0	0	0	0	0	0	0
338	5.97225	0	0	6.49671	14.9524	27.4173	28.6871	27.1167	28.3553	29.1291	26.9447	28.3711	32.7089	40.2381	64.9349	75.4112	67.4608	46.247	27.7845	17.7743	12.909	9.61756	8.90094	6.90076	4.16828	0.246118	0	0	0	0	0	0	0	0	0	0	0.0485913	0.0508736	0.0619452	0	0	0	0	0	0	0	0	0	0
339.07	0	0	0	5.08976	13.2538	26.0245	27.6431	26.0095	27.3545	27.54	26.3116	27.5188	31.0809	39.0087	63.0368	73.4207	66.4306	46.325	28.6972	19.277	14.4703	10.6962	9.65866	7.59636	4.8933	1.92111	0	0	0	0	0	0	0	0	0	0	0	0	0.0739788	0	0	0	0	0	0	0	0	0	0
340	0	0	3.50275	0.940971	13.3632	25.7121	26.1333	25.2103	27.3804	27.0899	25.3423	26.9097	29.898	38.5007	61.0334	71.5759	65.4203	46.0766	29.512	20.9359	15.8116	11.2509	10.4376	8.20843	5.70035	3.24255	0	0	0	0	0	0	0	0	0	0.03359	0	0	0.0878312	0	0	0	0	0	0	0	0	0	0
340.93	0	0	5.9684	0.560708	9.95834	24.6625	25.3243	24.9253	26.4056	26.7514	23.7882	25.8331	29.4694	36.948	59.1255	69.8152	64.3171	46.7308	30.4296	21.6708	17.1034	12.182	11.1515	9.19743	6.70267	4.05877	0	0	0	0	0	0	0	0	0	0	0.0119138	0	0.0878739	0	0	0	0	0	0	0	0	0	0
342.03	0	0	1.50453	4.76423	10.6592	23.7806	24.1958	24.5675	25.6932	26.0192	22.5639	24.924	28.5288	35.2076	57.8266	68.1849	63.1742	47.2717	31.2842	22.7711	18.909	13.7071	11.9874	10.5862	8.05108	5.06968	0	0	0	0	0	0	0	0	0	0	0	0	0.0375383	0	0	0	0	0	0	0	0	0	0
342.96	0	0	2.06761	3.33425	10.8167	24.0021	23.5459	24.4153	24.7403	24.6904	21.4902	23.9164	26.8484	33.7561	56.333	66.688	62.1614	47.7696	32.2971	24.5198	20.328	15.6377	12.9414	11.4367	9.19411	6.17806	2.86168	0	0	0	0	0	0	0	0	0	0	0	0	0.011712	0	0	0	0	0	0	0	0	0
344.06	0	0	4.22	0	8.8118	23.7894	23.6691	23.2799	24.9108	24.0683	21.5352	23.0526	25.7787	33.4404	54.9389	65.1918	62.1855	47.6214	33.2013	26.4541	22.0058	17.2007	14.2914	12.6169	10.3692	7.82527	4.38885	0	0	0	0	0	0	0	0	0	0	0	0	0	0	0	0	0	0	0	0	0	0
345	0	6.15609	7.00439	0	7.7247	21.7348	23.4265	21.4758	23.8902	23.586	21.0927	22.2265	24.7785	33.3393	54.2182	65.4275	62.4474	48.2697	34.299	27.8826	23.3827	18.9635	15.7413	14.2004	11.3526	9.03779	5.66565	0	0	0	0	0	0	0	0	0	0	0	0	0	0	0	0	0	0	0	0	0	0
345.93	2.76027	9.31737	0	2.09984	7.31561	19.8818	22.796	21.2361	22.722	23.2553	20.1404	21.6746	24.2371	32.3055	53.1656	65.6602	62.4636	49.4522	35.3747	29.237	25.5292	20.9789	17.4468	16.0157	12.8977	10.6403	7.06912	0	0	0	0	0	0	0	0	0	0.0596729	0	0	0	0	0	0	0	0	0	0	0	0
347.03	0	6.16707	0	2.71936	8.98909	19.2729	22.7216	21.8594	22.9561	23.02	19.3269	21.3158	23.8163	31.2585	51.6904	65.5762	61.5155	50.0195	37.331	31.2827	27.2482	23.1719	20.037	17.5346	15.0759	12.1815	8.91229	0.99937	0	0	0	0	0	0	0	0	0.0727351	0	0	0	0	0	0	0	0	0	0	0	0
347.96	0	0	0	0.645261	7.20248	21.3551	23.4772	21.9904	23.961	22.754	19.2409	20.5033	23.8289	30.9908	51.4035	64.7924	61.4313	50.8565	39.6313	33.6822	29.6116	25.1726	22.6291	19.4608	17.9865	14.5323	10.7688	6.45114	0	0	0	0	0	0	0	0	0	0	0	0	0	0	0	0	0	0	0	0	0
349.06	0	0	0	0	8.20567	21.3444	22.5436	22.5069	24.015	21.7331	19.1307	19.6293	23.1957	30.9039	51.8869	64.647	61.9645	51.8235	41.2029	35.5653	31.7633	27.9261	24.8314	21.6408	20.4593	17.2669	12.6256	8.89817	0	0	0	0	0	0	0	0	0	0	0	0	0	0	0	0	0	0	0	0	0
350	0	0	0	0	6.5846	20.5583	21.7564	22.3504	23.2833	21.2226	18.5802	18.793	22.9087	30.4119	51.8441	64.5551	63.1193	54.0229	42.4107	37.8373	34.6864	30.9743	27.462	24.4026	22.9607	20.3537	15.6342	10.7782	0	0	0	0	0	0	0	0	0	0	0	0	0	0	0	0	0	0	0	0	0
351.07	0	0.453881	0	0.59437	9.91862	20.0527	22.3647	22.4196	23.995	21.2525	18.541	18.9027	22.2512	29.8582	51.7382	64.2832	63.489	55.529	44.7375	40.5548	37.124	33.5462	31.3303	27.2	25.6677	23.2483	18.9972	13.3315	0	0	0	0	0	0	0	0	0	0	0	0	0	0	0	0	0	0	0	0	0
352	0	5.02419	0	2.55777	10.4858	22.3884	23.6652	22.5998	24.2686	21.0657	18.5591	18.499	21.4373	29.6942	51.8774	64.4492	64.0918	57.4926	47.494	43.4049	40.0652	36.3254	35.2962	30.5793	29.3507	26.5162	22.4917	16.6228	7.67698	0	0	0	0	0	0	0	0	0	0	0	0	0	0	0	0	0	0	0	0
353.07	0	0.053229	0	2.49715	9.24714	21.8507	24.6583	23.079	23.7489	20.5914	18.6347	18.2997	21.2081	29.567	51.6504	65.4995	65.2623	58.8087	50.2861	46.4558	43.4255	39.9385	39.2727	34.5898	33.6746	31.0561	25.4463	19.7458	11.7304	0	0	0	0	0	0	0	0	0	0	0.0265799	0	0	0	0	0	0	0	0	0
354	0	0	7.83192	0.446144	9.25397	21.1289	26.144	24.8218	23.4522	20.878	18.0933	18.0512	21.05	29.7572	51.7141	66.6877	67.7293	60.3141	52.8833	49.2573	47.3451	44.2744	43.2132	39.3228	38.0738	36.2639	29.3222	22.6874	15.446	0	0	0	0	0	0	0	0	0	0	0.0674209	0	0	0	0	0	0	0	0	0
355.07	0	0	6.20558	2.97361	11.4202	22.7012	27.7588	25.6844	23.8983	21.3618	18.0065	18.354	20.8123	29.619	53.0231	68.2751	69.1418	61.732	55.1744	52.3197	49.9638	47.9431	47.318	43.8338	41.9615	40.5099	33.1121	26.1403	18.4815	0	0	0	0	0	0	0	0	0	0	0	0	0	0	0	0	0	0	0	0
356	0	0	1.81179	2.93768	10.8654	24.8781	27.2663	26.0108	25.1583	21.6024	18.0982	17.8397	20.5375	29.8478	53.6716	68.9562	70.6692	64.1784	57.6902	54.8418	52.5103	51.4556	51.3123	48.4875	45.8268	44.2912	37.4818	29.7765	21.549	5.01665	0	0	0	0	0	0	0	0	0	0	0	0	0	0	0	0	0	0	0
357.07	0	0	0	0.452287	8.74252	27.5202	26.9955	26.1415	25.8992	21.1662	18.0045	17.6155	20.4254	30.0673	54.3087	69.9175	72.0765	67.8836	60.2015	57.8354	55.5618	55.0299	55.5538	52.2642	49.6399	48.5964	41.8375	33.7636	24.4837	12.6407	0	0	0	0	0	0	0	0	0	0	0	0	0	0	0	0	0	0	0
358	0	0	0	0	12.2205	28.806	28.6521	27.6584	26.7299	21.1677	17.6993	17.5659	20.3056	30.5467	55.4701	71.0557	74.1267	70.4598	63.2187	60.5065	59.4484	58.9645	60.0134	56.4946	54.1651	53.466	47.4787	38.5234	28.2113	17.5855	0	0	0	0	0	0	0	0	0	0	0	0	0	0	0	0	0	0	0
359.07	0	0	0	0.38263	15.2389	31.2869	31.7999	28.7089	26.4512	21.1218	17.7852	17.6342	20.2865	30.7138	56.4815	73.5994	75.4887	72.0696	65.3113	63.8442	62.823	62.9733	64.8777	61.3782	59.446	58.0609	52.9443	44.1462	31.9491	21.1573	0	0	0	0	0	0	0	0	0	0	0	0	0	0	0	0	0	0	0
360	0	0	0	0	14.4267	31.2302	34.3953	29.9907	26.7788	22.0099	18.2644	17.5906	20.2499	31.009	57.1374	75.4693	77.9067	74.0119	68.1313	67.8561	66.5314	66.577	70.0729	67.5039	65.1406	63.8375	58.2625	49.4239	36.3034	24.7691	0	0	0	0	0	0	0	0	0	0	0	0	0	0	0	0	0	0	0
361.07	0	1.23195	0	0	16.0248	31.2099	34.6279	32.5759	26.7664	21.8195	18.4414	17.9439	19.9441	31.0446	58.4481	76.6824	79.8623	76.9582	71.3042	71.4306	70.8507	70.8641	74.515	72.1934	69.9902	69.4554	62.9344	53.8769	40.3705	27.7901	5.96626	0	0	0	0	0	0	0	0	0	0	0	0	0	0	0	0	0	0
362	0	1.53513	6.45822	0	15.888	33.0974	35.6383	34.3055	27.8453	22.1479	18.1927	17.9775	20.2948	30.7734	60.6999	78.0005	81.6229	79.3356	74.1838	75.1881	74.9787	75.1174	78.8802	77.1603	75.6285	75.6161	68.7551	59.1741	45.4762	31.3038	14.729	0	0	0	0	0	0	0	0	0	0	0	0	0	0	0	0	0	0
363.07	0	0.214189	0.867737	1.93379	14.452	37.6395	37.5225	35.5757	29.0473	22.7209	18.3072	18.264	21.4438	31.5862	62.6109	80.1701	84.1881	81.6501	77.1765	78.4266	79.2452	79.8701	83.7273	82.4906	82.5081	81.9545	75.8745	65.4258	50.3564	35.1806	19.2822	0	0	0	0	0	0	0	0	0	0	0	0	0	0	0	0	0	0
364	7.16913	5.24508	0	4.62525	14.1284	39.228	42.308	36.6315	30.0993	23.8235	18.5916	18.243	21.5592	32.5248	63.4035	82.6247	87.6826	84.551	81.1097	82.4739	83.164	84.8578	89.3938	89.3322	90.592	90.162	82.2496	72.5736	56.2401	39.3381	23.0341	0	0	0	0	0	0	0	0	0	0	0	0	0	0	0	0	0	0
365.07	5.79225	2.39527	0	2.03442	19.1944	39.4703	44.3384	39.228	30.772	24.3498	18.7324	18.503	21.4495	33.8721	64.8798	84.8968	90.5371	87.8342	85.3676	86.3657	87.7623	89.7897	94.3864	94.8829	96.9606	97.245	88.9334	78.2689	61.604	43.6656	26.2134	0	0	0	0	0	0	0	0	0	0	0	0	0	0	0	0	0	0
366	0.71134	3.9472	0	0	18.9329	41.2942	46.1074	41.5254	32.3459	24.7415	19.0822	18.5114	21.3344	33.7324	66.614	87.9165	92.3259	91.1184	88.4877	91.2503	92.7911	94.3671	100.46	100.609	103.962	104.027	95.0866	84.2621	67.7009	48.215	29.5105	5.10977	0	0	0	0	0	0	0	0	0	0	0	0	0	0	0	0	0
367.07	5.31714	4.63698	0.118672	0.570268	19.646	45.3476	47.2138	42.9169	34.0126	24.8793	19.6764	19.1532	22.0625	34.4752	68.5415	90.3736	95.0649	94.7974	91.3652	94.5782	97.9242	99.5305	106.768	106.385	109.852	110.621	102.101	90.7005	72.7922	52.6403	31.932	13.1734	0	0	0	0	0	0	0	0	0	0	0	0	0	0	0	0	0
368	15.6646	11.2577	9.21005	1.44582	21.6452	46.3659	50.4748	44.1476	35.3903	26.0219	19.8854	19.5534	22.2043	35.7095	70.1775	92.1948	97.8639	97.4151	95.2925	98.2571	102.149	105.654	112.599	113.033	117.483	118.44	109.424	98.3543	79.243	57.477	34.8069	17.5767	0	0	0	0	0	0	0	0	0	0	0	0	0	0	0	0	0
369.07	3.85742	2.46143	6.98072	0.488165	24.9828	48.6987	51.9925	46.4169	36.2036	26.7233	19.9969	19.6075	22.7324	37.3019	72.1724	93.6453	100.935	100.32	99.6051	103.827	106.166	111.597	118.27	119.643	123.208	126.438	117.387	105.268	85.2914	61.8773	38.184	20.3067	0	0	0	0	0	0	0	0	0	0	0	0	0	0	0	0	0
370	0	0	4.41397	4.53714	26.1437	51.8955	54.4784	48.3676	37.7258	27.3765	20.9165	19.8666	22.7283	38.0171	73.7512	96.3468	103.298	103.687	104.955	110.461	110.973	116.935	125.084	126.456	130.89	134.743	124.628	112.739	91.8833	66.4612	42.3236	22.8529	0	0	0	0	0	0	0	0	0	0	0	0	0	0	0	0	0
371.07	0	0	5.71984	0.00872548	26.2632	55.653	56.7277	50.6911	38.484	27.9206	21.7549	19.9967	23.1446	38.9465	75.4343	99.5714	107.13	107.596	108.38	115.695	117.045	122.67	131.914	133.462	137.732	142.461	131.231	118.986	97.6273	70.9199	45.7634	25.0397	7.51678	0	0	0	0	0	0	0	0	0	0	0	0	0	0	0	0
372	0	0.409054	9.34351	0	24.7753	57.1073	60.7342	51.5341	39.6226	28.8897	21.9433	20.1079	23.7509	39.4587	76.9603	102.862	109.913	110.852	112.46	119.426	123.406	128.52	138.015	140.128	145.594	150.662	138.916	125.644	103.75	76.0702	49.8243	27.7283	12.7246	0	0	0	0	0	0	0	0	0	0	0	0	0	0	0	0
373.07	0	0	13.0166	3.07623	24.4015	57.6543	63.5402	53.6998	39.9678	28.9226	21.9515	20.257	25.0597	39.7821	78.8625	105.484	112.787	115.518	116.341	124.003	128.762	134.778	143.267	146.59	152.333	156.526	147.43	132.256	109.386	80.6547	53.2683	29.9676	15.4742	0	0	0	0	0	0	0	0	0	0	0	0	0	0	0	0
374	0.66605	6.06344	12.4309	9.58514	27.7369	61.0403	66.5748	56.3659	42.3323	29.3828	22.2264	21.0917	25.514	40.7749	81.3611	108.912	116.025	119.173	122.101	128.958	134.945	140.767	150.545	152.136	160.363	163.453	155.96	139.984	115.413	86.1631	57.0997	32.8591	18.5284	0	0	0	0	0	0	0	0	0	0	0	0	0	0	0	0
375.07	0	14.1866	15.4259	0.200253	30.9461	65.288	68.4118	59.7904	43.5751	30.3962	22.5913	21.6866	26.0031	42.1827	83.7648	111.357	120.607	122.813	125.766	133.826	140.845	147.105	157.659	158.005	166.333	171.419	163.059	146.856	121.763	91.8136	60.814	35.9581	20.4371	0	0	0	0	0	0	0	0	0	0	0	0	0	0	0	0
376	1.50766	15.1384	11.7129	4.79199	35.2908	67.582	72.7616	61.1758	46.0711	31.2439	23.2013	21.8546	26.2838	43.3709	84.8958	113.014	124.301	126.834	130.611	139.569	146.875	153.118	164.341	164.497	172.098	181.701	169.417	154.077	127.476	97.0614	65.7067	39.0733	22.6878	5.99667	0	0	0	0	0	0	0	0	0	0	0	0	0	0	0
377.07	2.87604	11.2489	13.4162	11.6645	37.5645	69.4759	74.7621	62.3723	46.8151	32.3821	23.8448	22.3634	26.9313	43.795	86.0931	114.822	126.398	130.773	134.103	145.325	151.093	159.728	168.508	171.224	177.752	187.584	174.959	161.313	133.021	101.806	69.234	41.9229	24.3235	10.8384	0	0	0	0	0	0	0	0	0	0	0	0	0	0	0
378	11.8561	13.6326	6.53928	17.0234	37.8162	71.8961	77.5048	64.0082	47.8906	33.2017	24.2658	22.6475	27.4233	44.5232	88.0813	118.097	129.381	133.633	139.005	150.279	157.063	166.115	174.864	177.594	186.186	195.515	181.693	167.971	139.701	106.931	72.7604	44.3167	26.5085	13.8795	0	0	0	0	0	0	0	0	0	0	0	0	0	0	0
379.07	1.56992	7.06278	5.73467	9.17878	37.3902	74.3069	79.1865	67.4522	47.959	33.7771	24.3679	22.9682	27.4405	45.3801	90.8852	120.81	133.494	138.187	143.467	153.901	161.631	170.308	181.04	183.891	193.511	202.686	189.663	173.582	147.581	112.1	75.887	47.3482	28.4233	16.0613	0	0	0	0	0	0	0	0	0	0	0	0	0	0	0
380	0	6.57807	8.58221	9.63197	40.1526	77.0013	83.1948	71.7527	50.0781	34.0377	24.5618	23.3255	28.0543	46.5228	93.4573	123.238	137.339	143.243	148.89	159.892	167.47	174.855	187.945	189.502	199.209	209.646	198.05	180.067	154.315	118.511	80.4716	50.6938	31.5715	17.8767	0	0	0	0	0	0	0	0	0	0	0	0	0	0	0
381.07	0	11.018	11.0894	12.5606	40.4933	78.7095	85.3897	73.7258	52.0214	35.1472	24.7994	23.8101	28.6673	47.0444	94.7458	126.072	139.499	146.808	152.459	166.617	172.957	179.822	194.138	194.468	203.662	214.816	205.559	187.672	159.586	123.842	84.8157	54.1562	34.4257	19.8643	4.08968	0	0	0	0	0	0	0	0	0	0	0	0	0	0
382	0.999067	20.2463	6.55347	11.7062	38.9527	81.6807	87.398	75.2013	53.8755	36.2503	25.4388	24.2701	28.838	47.9204	95.5044	129.217	141.422	149.719	156.8	171.962	178.693	186.899	200.967	200.396	210.508	222.964	212.881	195.571	164.662	129.119	90.2091	57.6432	36.9375	22.131	9.79404	0	0	0	0	0	0	0	0	0	0	0	0	0	0
383.07	4.18908	16.3507	3.74672	11.1625	38.7156	85.8404	88.2116	77.5652	55.3532	36.7992	26.5687	24.6949	28.5639	48.6958	97.3047	131.1	144.203	153.738	162.017	175.768	183.19	192.379	205.937	206.386	218.16	229.035	220.26	203.109	169.693	133.018	94.6419	60.661	38.9741	24.3285	12.5176	0	0	0	0	0	0	0	0	0	0	0	0	0	0
384	10.0455	14.3841	8.93267	13.4667	41.5219	88.8684	89.9636	78.6912	56.4614	37.639	26.9841	25.3213	29.2543	48.9981	99.6199	133.935	147.849	156.926	166.945	180.924	189.306	200.195	212.029	212.069	224.724	234.099	225.058	209.824	176.125	138.103	98.6543	64.236	42.1651	26.6018	14.8647	0	0	0	0	0	0	0	0	0	0	0	0	0	0
385.07	7.89343	6.28515	14.0266	20.7103	44.497	88.2709	92.5377	79.8877	56.7928	38.9505	27.3036	25.4653	30.2743	49.1699	101.892	136.648	151.253	160.642	170.493	187.659	196.055	205.391	219.545	216.446	229.186	239.47	230.906	215.939	183.674	143.239	101.893	67.6695	45.8542	28.9273	17.0419	0	0	0	0	0	0	0	0	0	0	0	0	0	0
386	14.7643	4.15042	16.4725	19.4387	49.0616	89.6331	96.9	82.1856	57.503	40.0436	27.6804	25.6794	30.6283	50.0604	103.124	139.625	153.87	164.235	174.462	194.237	201.639	210.137	224.924	222.754	234.188	247.636	237.317	222.359	191.601	148.383	106.712	71.9472	49.9861	32.0993	19.4713	5.55433	0	0	0	0	0	0	0	0	0	0	0	0	0
387.07	12.0908	10.3261	12.5308	19.7528	49.8589	93.7359	99.059	85.66	57.9981	39.765	28.2371	25.6376	31.1644	51.3622	104.772	140.618	156.433	167.86	179.503	198.529	206.768	213.156	227.328	228.11	239.565	254.486	245.789	230.208	197.55	154.537	111.714	75.8539	53.4723	34.7781	21.6371	11.3406	0	0	0	0	0	0	0	0	0	0	0	0	0
388	22.3317	10.0748	14.3409	20.8949	51.0782	96.8679	100.763	86.3363	59.4015	39.6129	28.2394	26.1869	32.1236	52.3994	107.03	142.649	160.067	170.387	182.492	201.876	211.7	218.616	231.109	233.911	244.041	258.456	250.568	236.098	202.189	160.045	116.35	80.6452	56.8242	37.5352	24.1543	14.8505	0	0	0	0	0	0	0	0	0	0	0	0	0
389.07	21.7917	14.2634	6.67409	20.2649	50.4221	98.4358	102.652	86.4531	61.1792	40.5945	29.1931	27.3837	32.6778	53.5291	108.66	144.404	162.821	174.269	186.245	207.414	217.469	224.597	237.601	237.77	247.259	262.549	256.942	241.321	206.905	164.752	120.589	84.4133	60.065	40.5782	26.6945	17.5081	0	0	0	0	0	0	0	0	0	0	0	0	0
390	18.5923	15.3473	8.2919	18.8115	49.447	98.5692	106.886	88.0866	62.7581	41.4431	29.9494	28.1053	32.8464	54.0465	109.104	147.912	164.863	179.082	191.066	213.377	222.366	231.417	243.515	243.081	253.922	268.114	263.185	247.735	213.053	169.523	125.738	89.2107	64.4285	44.4773	29.9481	20.0199	0	0	0	0	0	0	0	0	0	0	0	0	0
391.07	17.0734	26.5564	13.5187	22.5467	49.9109	99.1355	108.628	90.0122	63.6143	42.2167	30.3251	28.5005	32.957	54.5704	110.615	149.535	166.999	183.007	196.906	217.802	228.02	235.814	248.364	247.533	261.129	274.08	269.189	253.596	218.994	177.024	130.262	93.3471	68.4791	48.345	33.0629	23.0949	9.43407	0	0	0	0	0	0	0	0	0	0	0	0
392	15.7613	14.6031	23.6105	20.8944	52.1584	101.051	110.236	90.9564	64.9918	42.8963	30.8105	27.9108	33.7765	55.5013	112.994	151.178	170.676	186.158	198.968	220.8	232.817	240.692	253.122	252.17	264.921	277.219	271.042	257.672	224.976	183.123	134.777	98.1535	73.22	52.3621	36.4589	26.5291	16.0926	0	0	0	0	0	0	0	0	0	0	0	0
393.07	11.2429	8.89916	21.5711	20.8895	56.6696	104.221	111.618	92.7876	66.0203	43.8988	31.6878	28.2945	33.7963	56.3683	113.323	152.305	172.967	189.199	202.099	226.245	236.364	244.986	256.314	254.886	267.085	281.656	275.024	263.322	230.37	187.268	139.873	102.033	77.6009	55.9399	39.7614	29.1061	19.7663	0	0	0	0	0	0	0	0	0	0	0	0
394	7.99148	11.5632	20.4196	21.8055	53.7485	107.158	112.649	93.7035	67.2654	44.0168	31.735	28.4904	34.5102	56.7067	113.75	154.571	174.712	192.925	205.094	230.94	239.212	248.192	259.558	260.125	270.696	287.59	281.217	269.523	234.729	189.833	145.087	107.252	81.9788	59.414	43.3467	32.0937	22.7168	0	0	0	0	0	0	0	0	0	0	0	0
395.07	16.2362	20.6804	26.1026	20.8947	52.6853	107.348	114.014	94.4814	68.184	45.1301	31.3285	29.0789	34.5885	57.0901	114.51	155.872	176.176	194.574	209.551	233.794	241.807	251.518	265.324	264.049	274.766	294.546	286.573	273.79	239.492	195.455	149.209	111.753	86.0106	63.7115	46.7849	35.2988	25.7753	0	0	0	0	0	0	0	0	0	0	0	0
396	19.4865	20.3843	18.0042	17.1159	51.6599	106.807	116.484	95.6675	69.1496	45.9177	31.6763	29.2268	35.6231	57.8745	116.799	158.254	178.783	197.133	212.682	235.975	246.727	257.201	268.872	267.954	278.283	297.286	290.261	277.079	244.187	199.908	154.011	118.364	91.2446	68.3724	50.9828	39.4813	29.5277	13.1141	0	0	0	0	0	0	0	0	0	0	0
397.07	19.4297	19.0385	17.1479	18.7554	56.1832	111.019	119.088	99.7508	69.6132	47.0626	32.1409	29.772	35.6082	58.2936	118.508	160.915	181.273	199.21	216.627	238.327	250.968	262.297	274.165	270.628	283.791	301.303	292.201	282.387	249.71	205.928	158.999	123.3	97.1462	73.0564	55.774	43.4605	33.2325	19.2722	0	0	0	0	0	0	0	0	0	0	0
398	24.7946	21.7142	17.5136	20.0224	58.7663	115.559	119.654	100.933	70.8877	47.5847	32.8138	30.1719	36.0795	58.6846	119.698	160.824	184.576	201.098	219.02	242.789	255.771	264.427	276.419	274.15	286.633	305.525	297.712	287.399	254.224	210.203	164.12	127.868	102.32	77.4847	60.6312	47.638	36.4204	23.2927	0	0	0	0	0	0	0	0	0	0	0
399.07	24.8983	16.7088	23.0651	22.439	60.7758	117.483	120.692	101.808	70.6983	48.159	33.3114	30.0385	36.1843	58.8924	118.97	160.741	185.744	202.087	221.711	246.105	258.995	267.892	278.817	276.718	289.741	308.947	301.115	291.275	259.248	216.733	168.314	131.513	106.006	82.5095	64.4488	51.6917	39.0942	26.6346	0	0	0	0	0	0	0	0	0	0	0
400	21.6882	20.7649	17.5902	22.4927	60.1674	117.368	122.576	101.494	70.5448	47.8484	34.0154	30.1884	36.4754	59.7049	118.712	160.92	186.73	205.656	222.834	249.576	263.281	271.02	280.009	277.685	290.761	308.469	305.059	293.123	263.011	221.025	173.819	136.987	110.157	87.0176	68.7426	55.8047	41.9938	30.0009	2.60715	0	0	0	0	0	0	0	0	0	0
401.07	16.3455	19.0655	21.2025	15.4994	61.0563	118.268	124.768	102.154	71.6852	48.0964	34.6267	30.6574	36.9783	60.0977	120.275	163.687	187.914	208.38	224.851	250.193	266.845	272.232	285.102	280.713	294.942	311.246	307.507	296.13	267.875	226.472	178.849	141.565	116.225	91.2315	73.8139	59.5615	45.8721	32.7335	15.1186	0	0	0	0	0	0	0	0	0	0
402	9.23366	23.3592	20.6864	20.0459	64.5045	117.703	124.912	104.542	74.3961	49.152	34.8752	31.3062	37.0853	60.5154	122.04	164.597	190.257	210.019	227.469	252.573	269.649	273.847	289.013	282.267	297.72	315.97	311.535	302.74	272.855	231.428	184.796	146.631	121.455	96.7452	78.5608	63.7365	50.3043	35.8535	20.9297	0	0	0	0	0	0	0	0	0	0
403.07	2.81995	21.5493	25.6024	30.204	68.1235	120.903	125.792	107.868	74.1615	49.3856	34.7984	31.7754	37.5896	60.3723	123.004	166.162	192.402	210.95	229.399	255.884	271.038	276.629	290.038	286.24	299.217	319.106	313.976	310.152	276.254	236.583	189.605	152.23	126.018	102.837	82.176	68.3703	54.4075	39.0859	23.7147	0	0	0	0	0	0	0	0	0	0
404	9.03015	19.8124	21.9359	30.7897	69.8968	121.093	125.437	107.453	73.867	50.0373	34.9934	32.2596	37.214	60.8476	122.482	167.4	193.396	214.085	231.67	260.018	271.386	281.1	292.859	288.245	300.736	321.718	316.34	313.024	278.208	240.815	193.673	157.915	131.13	107.926	86.7507	73.8278	58.6537	42.1743	26.5502	0	0	0	0	0	0	0	0	0	0
405.07	11.6094	14.0596	26.7327	23.69	68.5084	120.829	125.864	107.001	74.2348	50.4401	35.8519	32.5522	37.1796	61.1835	122.997	169.982	193.931	216.076	234.481	261.312	273.423	283.599	296.213	292.408	303.558	323.608	318.391	314.482	282.39	245.206	198.054	163.48	136.369	111.845	91.908	77.9931	62.4269	45.1804	29.2531	0	0	0	0	0	0	0	0	0	0
406	12.5989	20.0533	23.3483	23.4551	67.4204	119.128	128.574	106.215	76.3774	51.3433	36.1123	32.272	37.5348	61.245	124.236	170.683	193.993	216.792	236.934	262.418	275.73	283.993	298.696	294.188	306.364	326.304	322.147	316.006	289.043	249.621	202.687	168.354	140.872	116.699	97.129	83.0443	66.0973	48.3083	32.3252	12.792	0	0	0	0	0	0	0	0	0
407.07	18.2853	15.5899	27.4936	25.0816	64.0196	123.875	131.066	107.648	76.3403	50.9659	36.5061	32.0841	38.122	61.2862	125.658	170.716	195.925	217.348	237.966	263.806	275.497	285.089	299.726	296.665	305.635	328.133	325.746	319.929	293.443	253.649	208.104	173.658	146.576	122.115	101.557	86.8948	69.4853	51.7408	35.0884	18.0652	0	0	0	0	0	0	0	0	0
408	16.2501	19.3765	23.7136	23.1875	65.6625	123.381	131.614	108.629	77.4144	52.1187	37.0873	32.988	38.1801	61.6341	125.607	170.591	196.745	218.869	238.635	266.666	275.845	288.217	300.111	297.277	306.975	330.337	327.491	321.809	294.187	257.096	212.787	178.653	152.865	127.004	106.396	92.2825	73.8276	55.1235	37.2989	21.4261	0	0	0	0	0	0	0	0	0
409.07	8.77786	20.3722	28.3374	29.3321	66.6006	124.342	129.376	109.936	78.3063	52.1694	37.2666	33.3788	38.673	62.7386	125.94	171.271	197.595	220.259	239.514	266.803	277.146	291.189	300.255	298.551	308.406	330.722	328.34	323.255	294.695	259.294	218.116	183.075	157.077	132.202	110.26	95.9832	78.4112	59.0633	39.8995	23.4742	0	0	0	0	0	0	0	0	0
410	13.4455	18.4874	23.8365	31.0542	68.2004	122.887	131.286	109.737	79.9917	52.7102	37.2865	33.6301	39.3979	63.3672	127.295	172.363	198.698	220.847	239.545	266.825	279.926	290.566	301.971	299.03	309.776	333.33	332.743	323.872	299.111	262.936	222.328	187.901	161.888	137.11	114.526	99.6133	82.4278	62.4731	42.6753	25.7825	0	0	0	0	0	0	0	0	0
411.07	12.6589	11.3442	22.563	28.4321	68.3588	125.901	132.491	110.891	79.9595	53.2996	37.1639	33.5802	39.6896	63.7519	129.026	172.902	199.2	222.516	241.356	267.496	280.249	290.494	302.866	300.097	312.302	335.163	337.346	327.928	302.669	268.353	226.856	192.038	167.574	141.534	118.669	103.888	86.2803	65.6792	45.6543	27.9044	7.35211	0	0	0	0	0	0	0	0
412	12.7793	8.80271	21.3895	20.1243	67.9047	124.407	132.534	110.482	79.8679	54.3097	37.4489	33.8645	39.3453	64.1862	129.619	174.169	199.534	222.607	242.865	268.845	282.832	290.578	303.322	300.712	315.643	337.214	340.397	330.844	304.679	272.168	230.961	197.318	172.905	145.651	124.564	110.094	90.7556	68.1014	48.4556	30.3485	13.4239	0	0	0	0	0	0	0	0
413.07	8.72509	12.1019	18.5124	20.6073	69.143	124.968	131.573	109.718	79.6572	53.917	37.7875	33.7505	39.5616	64.3271	129.542	174.176	199.692	222.953	242.713	270.382	282.333	290.375	305.969	302.015	317.567	335.862	339.555	333.673	306.502	276.032	234.94	201.861	176.691	150.578	129.026	114.864	95.1313	71.4337	52.1629	32.6245	15.6821	0	0	0	0	0	0	0	0
414	29.1817	10.7293	13.6684	21.9543	69.601	123.718	131.842	110.922	78.8254	53.3821	38.4805	33.8859	39.4324	64.0451	129.541	174.234	201.869	223.886	243.966	271.633	282.365	289.841	308.08	302.364	316.054	340.681	338.769	335.66	309.428	280.15	238.635	206.601	181.312	155.51	132.963	118.137	98.6967	76.0425	54.8666	35.0489	17.9457	0	0	0	0	0	0	0	0
415.07	23.4229	22.8527	8.49971	26.5595	70.6249	124.419	132.164	112.517	79.1335	54.274	38.5139	34.1009	39.6186	63.3201	129.372	173.497	203.371	225.383	244.18	271.711	282.748	290.962	309.03	301.563	318.424	341.117	339.074	339.254	312.952	284.291	242.029	211.336	185.956	159.883	137.248	121.543	102.704	79.7191	57.6751	37.1406	19.8782	0	0	0	0	0	0	0	0
416	30.1095	16.0541	2.87472	22.4714	68.4368	123.888	131.788	111.35	80.1433	55.8982	38.1081	34.1605	39.9641	64.2172	129.287	175.155	203.241	225.157	244.686	270.843	284.326	292.018	307.643	301.639	319.338	341.512	340.682	341.32	314.41	286.229	246.655	217.147	190.818	164.345	142.567	126.218	107.138	82.7027	60.0675	39.1477	21.7138	6.53536	0	0	0	0	0	0	0
417.07	22.1251	11.1153	0	22.1871	67.9879	124.94	133.586	109.882	81.7362	56.7683	38.5689	34.1736	40.5413	65.0204	129.535	176.133	201.123	224.875	242.027	271.34	283.535	292.661	308.138	304.527	320.808	338.85	340.291	343.046	317.288	288.395	250.92	223.146	196.05	169.404	146.405	131.037	111.011	85.9818	63.7243	41.9489	23.542	11.0671	0	0	0	0	0	0	0
418	17.6919	7.09372	0	17.8335	65.2414	123.507	134.487	111.245	82.14	55.4975	38.9122	34.5203	40.3224	65.3028	130.06	176.056	200.628	226.354	243.503	271.519	282.864	290.853	306.947	306.143	319.49	341.647	341.75	343.758	319.518	291.823	254.278	227.078	201.578	173.669	151.753	136.069	114.147	90.7795	66.8897	44.9649	26.0251	14.1144	0	0	0	0	0	0	0
419.07	11.1998	11.0211	0	15.6573	64.9305	122.072	132.603	112.372	81.789	54.6379	38.9278	35.2575	40.1464	64.4321	130.619	175.675	202.554	226.585	243.473	270.315	282.684	291.34	308.016	304.482	319.812	343.187	343.027	343.872	323.765	293.718	255.785	230.66	205.822	177.514	155.693	140.24	117.981	94.2947	70.1584	47.7156	28.3686	16.0366	0	0	0	0	0	0	0
420	8.6077	1.74931	0	10.7898	66.7437	122.526	131.033	111.856	81.7565	54.9577	38.4764	35.1315	39.9613	65.0654	131.38	176.741	204.194	226.628	243.266	270.307	283.901	291.539	308.575	303.761	319.905	344.65	343.423	343.983	324.94	296.183	260.133	233.73	210.98	181.764	160.002	144.082	122.074	97.5879	72.7385	50.0017	30.7916	17.7617	0	0	0	0	0	0	0
421.06	10.8956	0	0	15.489	68.3265	124.072	130.524	110.324	81.2307	55.7352	38.9171	34.9112	40.1758	65.0482	132.127	177.298	204.056	225.575	243.517	271.876	281.678	292.012	309.843	302.133	320.179	343.526	345.63	344.673	326.847	299.289	263.577	237.377	215.415	187.071	162.032	147.827	126.022	101.171	75.9842	52.4113	32.8161	19.5203	4.78252	0	0	0	0	0	0
421.96	15.4002	0	0	14.1602	62.9628	123.992	131.508	110.514	81.734	56.1637	39.3478	35.0239	39.6045	65.0478	131.747	177.637	204.366	226.199	245.26	272.6	280.643	290.435	307.268	302.127	319.019	344.186	346.417	346.674	327.427	303.211	266.815	242.389	219.136	192.446	166.86	152.144	130.585	105.038	79.5402	55.583	35.2204	21.2396	10.4668	0	0	0	0	0	0
423.03	27.4216	0	0	0.574603	59.902	121.841	130.962	110.833	80.8375	56.3698	39.2533	35.5504	40.0489	65.4072	132.06	176.816	204.501	225.042	245.63	271.756	280.661	290.382	305.623	303.674	317.683	343.969	346.415	346.652	328.718	305.912	269.867	246.778	221.7	195.969	171.032	156.671	135.25	108.43	83.1912	58.9965	37.0782	23.0423	12.824	0	0	0	0	0	0
423.93	27.5303	7.65802	0	0	60.664	122.446	130.806	110.607	81.4641	55.1591	39.5056	35.281	41.0634	67.1284	132.977	176.995	204.219	224.923	243.711	269.882	280.458	290.222	302.29	305.628	318.003	344.496	345.747	346.327	329.541	306.746	273.948	250.568	226.174	199.558	176.968	160.885	139.6	112.731	86.9867	62.4721	39.5616	25.2649	14.8567	0	0	0	0	0	0
425	20.6263	24.2719	0	0	58.6053	122.032	129.824	110.335	81.5463	54.9659	40.282	35.4032	41.2875	66.9831	133.188	178.113	203.926	226.439	243.983	269.572	277.747	289.917	303.279	302.622	315.926	342.708	345.332	348.332	332.74	307.891	276.627	252.327	230.179	204.088	181.181	165.41	142.876	117.79	90.4631	65.2167	42.3871	27.5753	16.4041	0	0	0	0	0	0
426.06	21.2476	25.5026	0	0	55.635	122.667	128.963	110.819	82.2401	55.9493	40.691	35.0539	40.7626	66.6373	132.446	178.601	203.98	227.716	244.209	267.937	277.524	286.071	301.425	299.447	315.285	342.911	345.115	349.974	334.796	307.712	275.551	254.09	233.788	207.422	184.367	169.613	147.277	121.413	93.8394	68.284	46.1563	29.7565	18.4439	5.31728	0	0	0	0	0
426.96	22.5785	13.3563	0	0	56.253	121.398	128.237	110.652	82.1951	56.9972	39.6127	35.2588	40.1992	66.0373	132.779	178.65	203.136	225.677	244.29	266.017	275.965	284.224	301.454	299.712	314.187	341.647	345.449	348.183	334.497	308.821	277.791	256.622	236.397	209.145	188.028	173.232	151.118	123.995	97.3791	71.4917	49.3547	32.1763	20.5699	9.79579	0	0	0	0	0
428.03	23.7936	12.04	0	0	59.6366	123.471	127.4	110.406	81.6347	56.6083	39.7005	35.3334	40.4749	66.2429	133.187	177.898	202.658	224.427	243.77	263.734	272.703	282.578	297.695	298.372	311.831	338.749	345.688	346.136	331.908	310.196	280.584	260.575	239.39	212.174	191.493	176.008	155.326	126.942	101.056	74.9466	52.2044	35.4944	22.6812	12.9316	0	0	0	0	0
428.93	22.914	5.98201	0	0	55.4463	121.615	126.432	109.851	80.774	55.7846	40.2582	35.2618	40.1633	65.856	132.447	178.462	204.652	225.579	242.616	263.17	269.88	281.587	294.15	296.702	310.368	335.228	341.352	343.528	331.521	312.348	284.229	263.097	243.537	217.416	195.607	180.348	158.412	131.539	104.52	78.7258	55.4184	38.7556	25.0395	15.6342	0	0	0	0	0
430	20.418	13.0415	0	0	52.5592	118.783	124.849	107.806	80.4323	54.8043	39.9923	34.6378	40.7203	66.334	131.689	178.662	206.304	226.112	241.785	262.209	270.533	277.307	293.734	292.632	310.955	333.845	340.111	344.139	330.994	312.921	285.436	264.748	246.852	222.729	200.006	185.897	162.386	136.328	108.987	82.7925	59.725	42.307	27.9217	18.0422	0.750373	0	0	0	0
431.07	17.2455	17.2051	0	0	49.8986	117.635	125.934	105.837	80.8581	55.2649	39.4787	34.662	40.4479	67.0728	131.781	180.502	204.711	225.138	241.213	261.894	267.941	273.167	293.7	290.491	311.002	334.347	341.214	344.816	330.894	312.321	288.194	266.527	250.541	226.116	203.653	190.98	166.446	140.062	113.183	86.1271	63.2959	45.4376	30.8097	20.5887	10.6644	0	0	0	0
432	25.5692	29.992	9.65537	0	50.1863	117.631	125.871	104.894	79.9966	56.1358	39.5474	34.7533	40.27	66.9144	132.54	180.72	203.048	225.107	240.572	258.986	264.538	270.22	292.664	287.604	307.815	331.248	341.177	346.049	329.788	311.532	287.924	269.471	252.849	228.386	205.67	192.485	170.36	142.783	117.291	89.7256	66.4834	48.5993	33.0793	22.6876	14.1228	0	0	0	0
433.07	33.5987	21.5809	17.8077	0	44.3859	115.053	125.991	105.469	79.2508	56.2502	39.8487	34.7301	39.7723	66.8624	133.643	180.454	203.3	226.504	238.252	256.838	262.063	269.412	288.289	287.251	306.213	327.675	337.34	340.958	330.253	312.707	286	270.96	255.683	229.633	208.563	194.955	173.892	145.994	120.819	93.8865	69.5538	51.3852	35.6853	24.795	16.2173	0	0	0	0
434	33.6893	22.2727	12.5029	0	34.9524	111.966	122.818	104.367	77.8833	54.818	39.1455	35.4429	39.9512	66.7879	134.65	179.929	205.417	227.863	237.703	255.419	261.328	269.569	285.482	285.318	303.125	325.672	331.434	337.917	331.301	312.558	286.055	274.544	257.296	232.914	212.69	200.022	178.972	150.924	125.247	98.3182	73.6826	55.5117	38.9046	27.3918	18.72	0	0	0	0
435.07	21.3204	16.1452	1.05777	0	24.3105	113.609	121.364	103.462	77.6263	54.4544	39.2102	35.2529	40.206	66.9367	134.107	180.303	206.763	227.615	235.963	254.315	260.825	268.045	282.887	284.903	303.104	325.595	329.288	336.959	330.832	314.094	289.548	276.572	259.512	235.529	216.805	204.756	183.996	155.635	129.854	102.209	77.6283	59.2738	42.6102	30.2355	21.1124	6.41828	0	0	0
436	16.0869	17.7398	14.6614	0	17.6524	112.84	119.973	102.083	78.0646	54.6944	39.3139	34.8279	41.2174	66.5693	132.965	179.738	208.713	225.554	234.948	253.704	259.696	265.362	280.434	281.899	300.053	323.241	327.108	338.076	328.254	314.144	291.356	279.041	262.159	238.593	221.423	208.064	187.915	160.922	134.328	106.639	81.8642	63.177	46.4284	33.0379	23.3855	13.1974	0	0	0
437.07	18.2431	22.3929	26.829	0	13.8011	110.685	117.973	101.613	78.8753	54.4457	39.882	34.4438	42.3137	66.5926	134.118	180.283	209.034	225.416	234.821	254.513	258.376	262.72	278.333	279.243	296.625	322.375	328.882	336.075	325.273	315.836	291.112	278.995	265.182	242.795	225.024	210.941	190.058	164.309	138.23	110.774	85.0371	66.0515	49.6269	35.6821	25.2307	15.5856	0	0	0
438	30.7967	26.1884	29.2856	0	4.92067	107.058	117.13	100.785	77.5609	54.4956	39.6192	35.6646	41.6784	67.0991	136.337	180.788	207.989	227.125	236.727	254.181	255.831	260.831	275.777	277.45	294.405	320.041	328.176	333.817	324.363	314.662	291.74	280.302	268.001	245.464	226.154	214.785	194.095	167.857	142.079	114.451	89.2484	69.2754	52.3794	38.1894	27.4707	17.8132	0	0	0
439.07	40.8894	28.9632	14.6783	0	0	103.569	116.893	100.503	77.3972	55.1001	39.6648	36.2201	40.4722	67.026	137.221	183.101	207.915	227.916	237.285	251.972	252.933	260.032	274.913	277.642	293.388	319.341	325.77	333.037	324.257	313.848	294.09	281.201	270.535	248.041	228.011	218	199.203	170.845	147.549	118.446	93.8858	72.9667	55.2572	40.7626	29.8352	19.7881	0	0	0
440	24.8232	21.5021	18.5028	0	0	98.4682	118.71	100.533	76.9595	55.7976	40.0345	36.1234	40.2097	68.2508	137.415	183.734	209.522	227.898	238.627	251.216	250.313	257.765	271.732	274.834	292.387	315.943	323.328	332.203	324.067	312.181	294.916	284.358	272.245	250.666	233.239	223.536	204.532	176.253	152.468	123.706	98.6488	77.4638	58.9044	43.7683	32.4472	21.4745	2.42853	0	0
441.06	13.0807	26.7608	19.5552	0	0	91.2528	116.941	100.367	75.9157	54.2963	40.6262	34.9039	41.2126	68.455	138.1	185.388	211.012	228.423	239.469	250.327	249.666	254.237	270.296	273.011	290.308	315.246	321.857	330.538	323.508	311.628	294.614	286.21	273.996	253.045	239.235	227.418	208.628	181.173	157.309	129.012	102.242	81.5288	62.2083	46.6004	34.3141	23.2378	10.3947	0	0
441.96	13.6872	21.5255	11.6701	0	0	85.9536	113.574	99.3377	74.8404	54.8528	40.2489	34.8522	41.5338	68.9763	138.464	186.848	213.507	229.942	238.242	248.971	248.558	250.989	267.981	272.053	289.027	312.345	320.305	327.85	322.095	312.459	295.654	287.609	275.117	254.845	242.22	231.885	212.606	186.679	161.328	133.266	106.075	85.931	65.4908	49.3749	36.6435	25.3636	13.821	0	0
443.03	21.7472	14.2528	13.2198	0	0	77.6755	110.966	97.5853	76.3868	55.026	40.2396	35.2047	41.4907	68.3445	139.548	189.501	214.869	232.504	238.659	249.238	246.427	250.736	267.307	270.059	285.998	312.095	318.126	326.717	322.522	313.221	297.346	288.923	278.473	257.672	243.164	236.412	217.313	191.497	165.809	136.59	110.629	89.5331	68.5516	52.1427	38.8912	27.2005	15.6485	0	0
443.93	19.0508	9.7288	19.4234	0	0	68.559	109.928	96.8745	77.024	55.4158	39.6796	35.9439	41.5585	69.6517	141.451	190.652	216.601	233.131	238.455	249.704	244.589	251.219	263.252	267.01	285.64	310.33	319.407	324.23	322.361	312.834	300.027	291.543	280.688	261.916	245.53	240.024	221.825	196.865	170.357	140.796	116.142	92.9686	72.5419	55.1876	41.3376	28.7688	17.3755	0	0
445	19.2231	17.5902	25.7614	0	0	52.887	108.497	95.9691	75.5236	54.8995	39.3467	35.5756	41.7228	70.0333	142.823	191.223	217.419	234.428	240.864	248.249	245.095	249.204	261.285	265.573	285.579	308.619	316.724	325.189	321.794	313.275	300.786	293.793	283.066	264.674	250.549	243.406	225.697	201.17	175.44	147.46	121.762	96.7112	76.3869	58.3788	43.9737	30.7779	19.02	0	0
446.06	23.8947	33.1269	25.1136	0	0	43.053	105.344	94.8631	75.7349	55.5649	38.608	35.6851	41.8335	70.7537	142.479	192.766	220.258	235.221	240.982	245.871	245.051	245.582	259.322	264.394	283.718	305.612	314.111	325.402	319.295	314.458	299.983	293.453	284.176	267.296	256.101	247.92	230.047	205.993	180.896	153.808	126.188	101.126	79.9382	61.8301	47.07	33.1527	20.595	8.75716	0
446.96	31.1063	40.0144	28.3915	0.309128	0	30.4627	103.248	93.3686	75.477	55.9149	39.4427	36.0291	41.6314	71.4345	142.735	195.187	220.545	238.653	242.57	245.199	243.074	242.011	257.846	260.422	280.064	303.242	310.64	324.351	318.613	315.367	298.406	293.359	286.6	269.679	259.66	253.409	234.837	210.782	186.055	159.612	130.188	104.96	83.2631	64.9965	49.6255	35.3097	21.8535	11.9257	0
448.03	38.75	43.8988	19.3908	9.77945	0	20.6141	100.271	93.3178	76.358	55.268	39.9351	36.4846	41.8491	72.349	144.122	198.39	223.041	238.437	243.326	246.368	243.075	241.021	256.031	258.94	278.353	300.838	308.543	321.081	317.367	313.469	297.544	295.021	288.163	272.209	260.919	256.057	239.851	217.347	190.407	163.096	133.875	109.312	86.5338	67.6202	51.7535	37.2047	22.913	13.2239	0
448.93	40.9205	34.8843	16.2164	8.9506	0	9.05234	94.6959	94.0174	76.1034	54.9143	39.9074	36.0904	41.8925	72.6354	146.5	198.893	224.955	241.337	245.325	248.224	241.504	241.542	254.679	258.361	276.289	299.626	306.16	321.838	317.485	313.321	298.482	298.247	290.517	275.324	262.866	259.303	243.994	221.492	194.838	167.54	138.86	114.111	89.6384	70.4854	54.0879	39.076	24.3786	14.7752	0
450	35.0601	36.0394	16.8031	13.4725	0	0	85.7226	93.5485	77.1896	54.0804	39.667	35.8039	42.4161	72.5513	148.241	199.229	227.01	243.059	246.275	248.458	240.541	240.858	253.209	258.888	273.91	298.298	306.05	320.65	314.47	313.694	300.097	300.415	294.369	278.965	266.589	263.502	249.769	225.163	200.898	172.216	143.504	118.905	93.292	73.6467	57.0372	41.2437	26.1134	16.1891	0
451.06	38.6953	35.0369	27.7582	22.9067	0	0	71.4727	92.4263	74.9319	54.7946	40.0627	36.1388	42.5597	72.8673	148.96	199.724	227.92	247.484	245.595	247.764	238.84	237.6	251.052	254.796	271.148	296.182	305.482	317.889	315.627	314.496	302.002	302.227	296.702	283.582	270.715	270.043	254.743	229.952	206.052	178.623	147.671	123.593	98.0788	77.9157	59.8429	43.0419	27.7436	17.7858	7.03348
451.96	42.4228	32.9268	27.6121	32.8179	0	0	50.7918	91.4004	73.8899	54.5749	40.9363	36.6397	42.8079	73.0515	149.611	202.045	229.506	250.009	246.693	248.579	239.659	234.845	249.024	251.727	271.056	294.319	303.294	315.473	314.768	313.555	302.046	303.156	297.319	284.809	274.287	274.523	258.034	236.282	211.374	183.689	151.441	128.15	102.202	81.5362	62.2336	44.9814	29.3921	19.0568	10.4859
453.03	47.9935	37.4031	29.0621	28.4025	0	0	28.752	90.2501	73.215	54.7408	40.8591	36.8864	42.6407	73.8622	150.205	205.184	231.856	252.364	247.783	248.486	239.36	234.858	248.276	249.986	268.784	293.54	300.833	313.789	315.045	313.564	303.856	303.09	299.745	284.734	277.591	278.826	260.853	239.634	215.933	188.237	155.815	131.481	105.3	83.5741	64.7707	46.8994	30.8839	19.9834	12.1091
453.93	42.5468	36.0942	23.0787	35.0244	0	0	0	87.0355	73.0547	54.1394	40.4674	36.8719	43.3764	74.1416	151.475	207.117	234.674	251.131	250.198	248.864	239.839	235.217	247.3	250.708	265.521	290.579	298.915	313.712	312.618	313.061	304.922	305.081	303.713	285.806	280.579	280.8	265.82	242.277	221.26	191.792	161.102	134.44	108.373	85.7129	67.4618	48.949	32.1302	21.117	13.0174
455	43.6933	31.2051	24.3713	36.2988	0	0	0	79.7193	71.6672	54.8528	40.1017	37.0548	43.7486	74.3231	153.084	208.864	237.116	252.765	252.029	248.583	239.297	233.157	246.099	248.682	262.435	288.143	298.704	313.633	313.139	312.43	304.818	307.52	304.886	289.333	282.64	283.582	272.263	248.796	224.585	196	165.65	138.909	112.625	88.816	70.2027	50.8847	33.4504	22.4715	14.317
456.06	42.0393	30.5446	20.5568	32.2004	0	0	0	65.713	71.63	54.7161	40.059	36.9378	43.9276	74.7492	155.078	208.068	237.952	255.055	253.404	248.189	238.129	230.433	242.35	245.343	260.401	285.595	295.494	312.208	312.175	309.88	302.198	307.844	304.196	289.97	286.327	286.531	275.38	253.2	229.516	201.313	170.448	144.356	116.454	92.5597	72.6452	53.13	35.1706	23.4362	15.4812
456.96	31.9617	36.5335	23.1805	21.4673	0	0	0	46.5847	71.891	54.5404	40.1402	36.5655	43.2834	75.5766	156.349	210.091	239.52	257.424	253.373	247.118	236.616	227.65	239.811	242.521	259.016	284.303	292.307	307.827	310.934	308.275	301.329	306.915	306.28	292.615	289.555	290.752	277.86	257.073	235.167	206.136	174.285	148.316	119.831	95.7403	75.0949	55.1783	36.8661	24.4184	16.5825
458.03	18.7118	39.6731	25.4901	20.9086	0	0	0	26.8244	71.2431	52.4759	40.207	36.3226	43.3027	75.5565	155.449	210.296	242.117	257.66	253.792	248.337	234.971	227.195	237.213	241.018	257.172	282.566	290.019	306.336	308.393	306.291	301.293	307.574	307.771	293.723	290.841	292.019	280.918	260.133	238.957	209.379	178.742	152.2	123.062	98.5683	77.3247	57.0831	37.9645	25.5275	17.2579
458.93	23.5237	39.2157	24.1269	20.0222	0	0	0	3.90932	70.1958	53.0594	40.4026	36.2252	43.3214	75.042	155.177	212.539	242.976	258.242	254.656	250.911	233.309	226.769	235.732	238.685	256.218	281.908	289.95	303.499	305.084	305.888	302.891	308.112	308.532	295.75	293.257	293.862	284.078	265.309	241.675	212.479	182.263	155.988	126.205	101.038	80.0249	58.7268	39.2973	26.9988	18.3217
460	43.5911	37.9736	26.6665	21.5266	14.423	0	0	0	70.1852	53.6092	40.1598	36.0933	43.8756	75.5203	155.445	213.986	244.422	257.319	255.198	251.231	232.717	226.349	234.745	236.955	253.553	279.014	288.108	300.612	303.517	305.286	302.635	307.557	308.699	296.89	295.101	296.511	285.913	267.626	245.489	217.225	185.818	160.049	128.902	103.038	82.719	60.4052	40.7077	28.3513	19.4431
461.06	51.2445	29.4589	23.1594	21.9851	35.6064	0	0	0	68.8776	53.8863	39.6058	36.5157	43.7538	75.9431	157.955	217.349	246.478	260.661	256.682	250.122	231.668	223.642	232.244	235.912	251.771	276.898	285.267	297.332	303.183	304.783	303.904	308.373	309.184	300.655	295.977	300.328	289.34	271.016	248.952	221.516	189.297	162.35	131.866	105.634	85.2841	62.2582	42.1556	29.6817	20.302
461.96	40.4302	31.1252	28.1396	22.1118	43.2713	0	0	0	67.2635	52.4464	39.0539	36.6457	43.9842	76.4026	158.752	216.971	246.358	263.658	257.447	247.219	229.944	220.167	229.8	235.422	249.128	275.215	282.129	294.393	301.463	302.938	301.66	310.187	308.706	302.271	296.337	303.157	293.176	274.033	251.848	225.662	193.686	165.613	135.146	108.695	86.9134	64.281	43.581	30.5397	21.2618
463.03	24.0489	39.1268	32.4071	19.6517	41.3491	0	0	0	66.8013	52.0278	38.7004	36.7728	43.8527	76.1793	160.142	214.941	246.133	264.118	257.07	248.056	229.726	218.646	227.391	232.898	246.551	271.349	279.39	292.981	298.8	301.683	300.241	310.471	308.589	300.592	298.986	305.317	294.964	276.768	255.969	228.007	197.539	168.342	137.777	111.837	88.7238	65.986	44.9771	31.7165	22.1452
463.93	22.3983	42.4152	39.4774	17.1982	47.652	0	0	0	65.826	51.961	38.8487	36.4109	44.076	76.8145	159.274	214.138	247.373	261.932	257.729	249.099	228.708	217.781	225.186	229.735	244.361	265.681	276.57	294.335	297.989	300.918	299.519	308.056	309.103	301	301.169	306.385	297.957	278.13	260.572	231.44	199.803	171.759	140.392	114.026	90.651	67.6036	46.2963	33.0866	23.0023
465	40.9328	35.2526	35.7421	17.8076	53.9023	8.50164	0	0	60.9908	52.0898	38.4851	36.7868	43.2625	77.0744	159.333	217.137	248.75	264.017	259.635	248.493	226.538	215.384	222.783	226.725	242.056	262.408	274.357	292.53	295.451	299.003	299.61	307.602	308.607	300.693	300.969	307.737	300.152	281.136	262.679	235.047	202.714	174.675	143.438	115.044	92.7821	69.3109	47.4271	34.2831	23.8349
466.06	54.5235	36.9802	40.9013	22.941	54.8116	36.4895	0	0	53.8744	52.3386	38.1014	36.6513	43.0933	76.6252	160.41	218.458	246.956	266.804	257.88	244.139	224.877	211.398	220.73	223.733	239.365	262.339	271.793	288.338	292.269	296.442	297.232	306.464	308.36	302.145	299.832	308.673	302.046	284.676	265.513	237.255	205.262	176.068	145.761	116.928	94.4567	71.0169	48.4262	35.0952	24.8077
466.96	61.0616	37.5617	41.2529	25.4816	48.2753	54.6136	0	0	44.9523	51.2905	37.5574	36.512	43.1076	76.2209	161.529	219.002	246.861	267.108	257.219	242.279	224.126	209.413	219.227	220.903	236.802	261.033	268.252	284.12	290.133	294.182	294.588	306.212	307.836	301.374	297.829	309.052	302.246	288.594	267.429	238.858	206.772	177.904	148.065	119.112	95.9679	73.0845	49.5004	35.7707	25.5553
468.03	55.7705	36.7618	35.9378	28.2989	52.4273	64.5495	0	0	34.7881	50.5247	38.3776	35.8075	43.1687	75.8474	160.499	219.106	247.776	263.542	255.479	241.634	222.005	208.797	216.796	219.474	235.409	258.626	264.482	281.539	290.021	292.56	291.514	303.334	307.249	299.777	299.48	310.058	305.092	289.124	268.865	240.94	208.236	178.787	149.286	121.455	97.4271	74.139	50.674	36.25	26.1064
468.93	57.3128	40.4925	28.9538	27.9551	55.0948	72.0717	0	0	22.5265	49.806	38.2612	35.502	42.9698	75.5976	159.159	220.708	248.833	261.466	254.281	242.865	219.412	206.484	214.573	217.584	233.632	255.396	262.962	278.719	286.065	290.404	288.815	303.087	306.064	297.705	301.706	311.174	306.162	288.94	269.491	242.729	211.755	181.344	150.591	123.193	99.4048	75.176	51.9012	37.0432	26.8875
470	39.9196	51.4931	27.797	28.474	51.5945	76.8811	0	0	6.31037	49.0595	37.762	35.3974	42.9178	75.5668	158.835	218.73	249.248	262.397	253.82	241.071	217.217	202.764	210.866	212.907	230.242	252.276	261.061	275.971	282.312	286.228	287.188	300.768	304.19	298.264	301.789	310.534	306.544	289.882	272.329	244.296	213.918	183.622	151.776	124.332	101.347	75.6879	52.7544	38.0475	27.7391
471.06	31.703	54.3315	36.8021	29.4436	48.713	80.4865	0	0	0	48.0697	36.9418	34.579	42.8598	76.1778	158.752	216.862	249.632	264.582	255.281	239.543	216.157	199.747	207.372	208.584	226.349	247.201	257.903	272.282	279.442	281.688	286.346	298.881	301.819	300.751	301.501	310.296	305.405	291.144	274.364	246.992	214.798	186.771	153.085	125.393	102.265	76.6239	53.5391	39.1394	28.3918
471.96	39.0421	45.4734	45.5607	33.1057	48.7356	81.6869	0	0	0	46.7746	37.03	34.2924	42.0442	76.2326	158.27	216.044	248.175	264.794	253.932	237.895	214.367	199.356	205.07	207.637	223.891	244.747	254.079	268.784	276.039	279.184	283.331	297.357	301.238	298.214	299.669	310.442	305.382	291.956	275.396	250.562	215.46	187.796	153.564	126.564	102.929	77.119	54.0067	39.5561	28.7985
473.03	59.8583	45.5276	41.945	31.8904	51.7832	84.0221	0	0	0	45.5422	36.6681	34.3402	41.6008	75.3778	157.901	216.694	248.232	263.661	252.839	239.401	212.066	197.619	202.667	207.207	221.078	242.422	252.415	265.904	272.082	279.722	280.261	295.559	302.094	295.829	297.696	310.214	306.064	292.345	274.579	251.28	216.948	188.518	154.478	128.015	103.868	78.1815	54.5048	40.1316	29.4027
473.93	54.1634	46.7931	36.5457	31.3243	53.3565	84.1492	18.3816	0	0	43.1704	36.0397	34.2791	41.4092	75.232	157.457	215.968	247.955	264.005	252.327	236.231	208.699	195.172	199.055	204.11	216.436	240.704	248.385	263.263	268.587	278.332	278.048	291.432	301.851	294.133	296.293	310.257	305.226	293.412	274.46	250.831	218.232	189.444	156.583	128.714	105.441	79.0676	55.4807	40.8328	29.9844
475	44.2052	46.4537	39.3236	30.2506	53.0426	81.5382	36.9212	0	0	39.376	36.54	33.4474	41.4253	74.4646	156.351	214.243	246.462	263.158	251.646	233.855	207.555	191.695	195.678	201.253	211.855	236.597	243.554	258.947	266.587	274.262	275.777	287.663	297.99	292.099	297.132	308.911	304.356	293.86	274.859	250.489	218.534	190.726	157.623	129.678	106.136	80.4712	56.4032	41.7049	30.6948
476.06	34.7133	42.0547	44.1666	21.9368	46.217	78.0238	50.2004	0	0	34.6048	36.1792	32.9272	40.6712	73.9135	155.019	213.737	245.146	261.818	251.343	230.89	207.739	188.251	194.305	197.979	211.385	233.341	239.749	255.527	264.098	270.748	273.523	286.598	294.229	290.726	296.406	309.048	303.955	294.146	275.573	251.903	218.23	190.98	158.363	130.945	106.978	81.1935	56.9417	42.331	31.2265
476.96	44.1028	44.8148	40.6915	19.0779	43.753	77.8787	58.6658	0	0	30.2843	35.4722	32.5359	39.6272	73.6549	154.223	213.485	244.818	259.473	251.011	230.587	205.692	185.972	192.67	196.379	208.525	229.479	238.574	251.411	260.313	267.808	270.811	285.382	290.247	288.376	295.447	308.182	304.396	293.419	276.172	253.168	218.616	191.461	159.162	131.663	107.264	81.5872	57.3788	43.2234	31.984
478.03	41.4316	46.1804	40.2261	20.72	45.0938	79.1897	64.6991	0	0	23.0239	34.2934	32.0123	39.1681	73.4081	155.362	213.242	244.869	259.175	247.865	228.963	201.683	184.701	189.424	193.255	206.2	225.76	235.693	248.748	255.124	264.905	268.567	282.164	288.055	286.839	292.875	307.448	303.897	291.845	275.383	252.244	220.089	192.429	160.102	131.375	107.967	81.813	58.128	43.5665	32.2344
478.93	44.9399	48.4311	36.1258	21.4065	44.7103	77.7916	70.4562	0	0	8.8777	33.8683	31.7621	39.4607	72.2565	155.008	211.108	242.102	258.587	245.577	227.362	198.44	181.801	186.169	190.634	202.735	223.429	231.893	245.631	252.841	259.873	265.388	278.398	287.804	284.6	289.833	303.579	301.471	289.942	273.883	251.645	220.04	193.432	160.385	131.97	108.726	82.5501	58.7133	43.7114	32.6684
480	42.0175	44.0689	29.367	22.1819	41.4092	76.856	74.3866	0	0	0	31.9504	31.7199	39.1349	71.2823	152.443	210.357	240.514	256.453	243.385	224.01	196.811	177.972	183.53	186.744	201.527	220.241	227.231	241.752	249.066	257.629	261.309	275.286	286.265	282.777	287.182	299.756	299.433	288.137	272.996	251.519	220.642	192.967	161.005	133.025	109.622	83.1252	59.1909	44.0043	33.0349
481.06	45.4214	36.2548	19.6017	29.2429	40.3574	73.5354	75.7042	0	0	0	29.8162	31.467	38.6501	70.5582	149.509	209.075	237.948	254.411	242.562	219.972	194.44	175.81	181.963	184.39	198.413	217.259	222.241	236.838	245.991	255.765	258.309	274.121	282.992	279.603	286.457	297.173	297.954	287.797	272.573	250.397	221.291	192.984	160.807	133.316	109.558	83.6986	59.8209	44.805	33.6912
481.96	41.3825	36.0674	17.6664	29.4793	36.9767	71.8639	75.775	0	0	0	27.3224	31.0992	38.2773	70.1288	148.576	208.389	237.748	252.356	240.514	219.489	193.229	174.364	179.272	182.208	195.399	212.104	220.247	233.688	242.313	253.761	257.377	272.191	278.539	277.188	285.034	295.349	296.019	287.056	272.31	249.031	220.943	193.375	159.943	133.175	109.17	84.3632	60.5592	45.1375	34.1601
483.03	28.2222	31.5613	16.99	16.3565	38.2693	69.8283	74.5418	0	0	0	24.1822	30.0765	37.9759	69.4424	148.451	206.155	237.593	251.48	238.853	218.496	191.268	171.972	177.669	179.286	191.525	208.342	217.613	231.288	240.256	247.556	255.359	269.525	277.178	274.719	283.254	294.798	293.618	285.203	272.135	248.478	218.757	193.42	159.762	133.387	109.316	84.1664	60.6852	45.3732	34.8611
483.93	23.1186	26.9296	27.9893	11.6172	35.1448	67.9373	73.1744	0	0	0	17.1128	29.1118	37.334	68.589	147.371	203.365	236.199	247.781	235.195	216.991	188.489	168.779	175.225	175.797	189.045	206.628	214.556	227.359	235.917	242.058	249.799	266.597	272.908	270.791	279.767	292.631	291.741	282.353	271.255	249.103	217.981	192.021	160.148	133.82	109.419	83.9467	60.6295	45.6364	35.0513
485	17.8889	20.3012	34.0231	21.4599	37.8355	65.8445	70.2322	0	0	0	8.54497	28.8006	36.7883	67.8686	146.819	201.745	232.98	244.274	233.84	214.045	185.418	167.045	172.602	172.907	185.062	203.931	209.937	222.864	232.481	237.53	245.69	263.226	269.945	268.327	277.312	290.795	291.162	281.266	268.525	246.19	217.68	191.06	160.926	133.527	109.356	83.9397	60.6782	46.3288	35.625
486.06	22.4621	18.5898	34.8307	25.3305	36.98	64.3236	67.482	0	0	0	0	29.115	36.6449	66.8755	145.041	199.749	231.517	241.468	231.071	212.211	183.619	165.194	168.922	170.123	181.221	199.705	208.2	220.458	227.46	235.553	242.206	258.292	266.997	265.957	274.494	288.413	288.694	280.524	265.735	244.351	218.212	191.126	160.65	133	108.869	84.7684	61.1512	46.4974	36.0205
486.96	17.4575	17.7395	22.3585	12.6703	40.1414	65.1714	67.676	0	0	0	0	27.805	35.7386	65.6824	142.626	198.631	230.703	241.4	228.913	209.369	180.785	163.813	165.649	166.064	179.648	195.773	204.333	217.445	223.846	231.826	239.236	254.735	264.471	263.802	271.661	285.946	284.929	279.354	264.977	243.254	217.29	191.202	159.697	132.265	109.516	85.2638	61.6373	46.6902	36.423
488.03	8.25703	26.206	23.2237	6.43275	36.4675	63.68	70.5267	12.7085	0	0	0	27.2231	34.8853	64.7218	139.492	195.179	229.41	240.131	227.017	206.348	178.701	160.761	162.027	162.478	178.277	194.111	202.066	213.579	220.781	229.586	234.346	251.44	260.607	261.33	268.428	283.954	281.877	277.048	264.971	242.949	215.775	190.413	157.905	132.592	109.576	85.1166	62.4302	46.8948	36.4541
488.93	12.0475	28.0418	20.3491	19.7653	37.2838	60.3179	68.5658	32.0821	0	0	0	27.1419	33.8494	65.3045	139.271	194.647	225.559	237.238	225.052	204.593	176.172	159.275	158.936	160.883	174.686	191.624	198.838	208.503	218.072	227.022	232.897	247.512	257.789	258.544	265.462	280.648	279.747	274.446	262.979	240.904	213.036	189.258	158.002	132.915	109.418	84.6276	62.4355	47.5989	36.8695
490	18.1282	31.3543	23.0034	31.0766	37.1719	58.2514	65.134	44.0063	0	0	0	26.8005	33.289	64.9564	138.623	190.918	220.793	233.492	220.861	202.089	174.262	156.291	158.059	158.806	171.861	188.014	194.894	204.865	213.866	224.184	228.943	241.943	254.373	253.945	262.15	276.664	278.038	271.063	259.683	238.156	211.256	189.05	158.487	132.704	108.634	84.4547	62.3048	47.9757	37.2243
491.06	33.4666	30.6447	21.44	24.0973	34.3349	56.8042	63.2147	50.1373	0	0	0	24.125	33.2652	63.7795	137.485	189.639	218.022	230.372	218.093	199.97	172.027	153.187	155.632	154.387	168.387	183.545	191.611	201.483	211.275	218.785	226.468	239.764	251.298	249.975	258.448	273.159	274.637	268.548	256.975	237.334	210.699	187.136	158.306	131.837	108.593	84.443	62.2892	48.3897	37.6046
491.96	20.27	34.9301	27.3164	15.2778	31.1997	56.0557	62.2632	53.5841	0	0	0	19.1917	33.2234	62.2298	135.528	186.805	217.515	228.86	217.45	196.692	168.853	150.737	152.19	152.117	164.769	181.031	189.144	199.033	206.62	214.161	222.887	237.689	248.148	246.395	256.111	271.042	271.504	266.443	255.078	236.236	210.762	185.802	156.359	131.077	108.788	84.4883	62.7321	48.7414	37.8637
493.03	16.8686	26.0478	23.8029	11.195	29.7334	52.1391	59.701	54.124	0	0	0	12.5171	32.7274	61.8316	132.767	187.032	215.458	226.379	215.816	194.368	166.207	149.622	149.2	151.25	162.2	180.371	186.026	195.946	203.154	210.601	220.584	234.062	244.833	243.523	253.592	269.327	269.38	263.873	253.104	234.836	210.426	184.469	154.691	130.509	108.587	84.2441	62.6554	49.1965	38.3119
493.93	8.30827	24.9489	23.4731	16.3379	33.2147	50.8701	57.4067	52.0034	0	0	0	3.19168	31.4303	60.9976	130.29	185.282	210.754	222.73	214.092	192.054	164.043	147.263	147.531	149.967	160.442	177.957	180.993	193.156	198.64	207.834	216.193	231.63	241.261	241.685	250.806	265.826	267.276	259.669	251.419	231.397	208.724	184.406	154.724	130.038	107.504	83.7559	62.2892	49.2363	38.4658
495	22.3878	26.886	20.0866	11.6186	29.6028	50.487	55.8445	49.1699	0	0	0	0	30.9478	59.3412	129.516	182.527	206.915	218.403	210.812	189.438	161.787	144.527	144.33	146.249	157.493	172.461	176.797	190.096	195.322	205.937	212.704	229.935	237.957	238.826	247.143	262.175	264.025	257.699	249.938	230.168	206.368	182.392	154.734	129.49	106.867	83.4895	62.2378	48.9172	38.4181
496.06	27.2804	32.878	28.0947	6.99528	26.5658	52.1622	54.4831	48.2495	0	0	0	0	30.1339	57.9868	129.375	178.241	205.843	215.954	206.682	186.493	158.992	141.185	140.756	143.519	154.712	168.456	174.784	186.525	190.543	203.371	209.749	226.512	233.946	235.264	243.856	258.031	259.167	255.231	247.439	228.252	203.465	180.753	153.109	128.414	106.728	83.6806	62.5112	48.8156	38.6033
496.96	27.8764	30.9279	26.8803	9.49136	25.2168	50.0984	53.7313	48.1166	0	0	0	0	30.2489	57.5391	126.192	176.288	204.082	215.141	203.254	182.862	156.14	137.626	137.667	139.264	151.427	166.287	171.577	183.065	188.594	199.507	206.114	220.654	230.227	231.675	240.204	256.17	256.105	251.877	243.56	225.965	201.451	178.669	150.702	127.933	106.648	83.4479	62.5353	49.0678	39.1189
498.03	19.8855	22.3717	23.6094	20.5172	32.6474	48.5559	51.1023	48.5627	0	0	0	0	29.4876	57.5354	123.602	173.994	201.842	211.951	201.412	180.707	153.854	135.707	135.889	137.281	148.947	163.903	169.024	180.226	187.272	194.678	202.216	216.895	228.591	228.901	236.023	253.036	254.058	248.034	241.12	223.643	199.943	177.453	149.476	126.829	105.871	83.4033	62.2972	49.305	39.6587
498.93	25.6008	23.0768	19.445	17.1274	31.7347	47.2396	49.161	47.8849	9.53282	0	0	0	28.5393	56.3391	123.231	171.687	197.591	209.301	197.684	178.947	152.152	135.082	133.733	135.633	146.168	159.259	165.691	177.532	184.713	191.189	198.606	213.889	224.691	225.695	233.649	248.632	251.306	246.025	237.672	221.582	197.604	176.425	147.55	126.245	104.979	83.3002	61.7547	49.3363	39.5506
500	33.5109	32.8532	28.4359	14.9512	31.5168	47.8734	48.7641	46.6323	23.4138	0	0	0	27.9615	54.9712	122.743	170	194.569	206.048	193.511	177.158	151.009	133.445	131.683	134.362	144.058	155.914	163.383	174.406	180.357	189.303	195.144	210.568	219.18	222.522	231.142	244.503	247.076	243.703	235.428	219.565	195.472	175.259	146.4	125.414	104.65	83.4411	61.5559	49.2493	39.5727
501.04	34.2241	29.9838	30.607	21.6402	29.0451	47.3859	50.0942	45.1902	32.716	0	0	0	27.3987	53.6833	120.973	168.832	192.205	203.989	190.777	175.047	147.109	129.458	129.149	130.709	140.719	153.833	158.387	171.005	176.617	187.118	190.798	206.613	215.5	219.12	227.397	241.168	244.83	241.611	233.466	217.03	194.104	172.976	146.004	124.54	104.565	82.6214	61.2869	49.0818	40.0006
501.94	35.7596	27.1145	30.2497	20.8726	31.9377	48.8882	50.196	43.9883	35.9374	0	0	0	24.8662	52.9365	117.677	165.278	189.271	200.163	188.922	170.991	143.761	126.551	127.804	128.387	137.687	152.538	156.208	167.554	174.82	182.058	187.909	202.209	213.632	214.839	222.56	238.21	241.577	237.126	231.868	214.194	192.091	170.555	145.261	123.527	104.739	82.1592	61.081	49.1624	40.4276
502.98	33.5388	26.9005	36.9037	15.7688	28.4019	48.8372	49.8824	43.5916	36.0464	0	0	0	20.7125	52.1062	115.172	161.33	185.611	198.038	186.32	168.037	140.956	123.821	126.033	126.026	134.372	148.769	152.878	163.826	171.485	178.085	185.178	198.894	210.255	212.246	218.904	235.283	237.063	232.935	227.478	209.754	189.98	168.928	143.082	122.866	103.406	81.5419	60.5963	49.4202	40.1459
504.02	28.9049	31.091	41.3047	17.2924	29.6586	46.704	46.7995	42.6061	34.6974	0	0	0	15.8834	51.1261	113.201	158.876	182.39	195.281	183.234	164.531	138.701	121.981	123.602	123.562	131.715	144.659	149.757	160.064	167.718	175.712	183.167	195.809	207.134	208.961	215.582	232.676	231.743	230.068	222.854	205.982	186.879	166.256	140.513	121.273	102.087	81.217	60.6697	49.5052	40.1172
505.07	25.1063	27.1023	37.8495	17.5398	29.9513	45.7645	45.3071	42.6857	34.6168	0	0	0	10.825	50.2336	111.913	156.682	181.305	191.131	179.862	162.899	136.081	120.658	119.91	121.439	129.19	141.445	146.22	156.562	164.289	174.01	179.54	193.227	203.921	205.531	213.025	228.623	229.406	228.596	219.98	204.019	184.872	163.933	139.258	119.663	100.661	80.2603	60.6215	49.2753	40.5634
505.97	27.5261	25.9046	27.5672	12.0153	31.2364	46.1908	44.6483	41.5362	34.205	0	0	0	4.81114	49.239	110.315	154.833	179.016	186.73	176.703	159.36	134.366	119.053	117.709	119.713	127.151	139.51	144.638	154.265	161.431	168.679	176.311	190.201	200.343	200.584	208.313	222.853	226.074	224.595	216.326	203.165	182.183	162.418	138.38	119.008	100.341	79.2046	60.4555	49.2645	40.7209
507.01	28.1643	26.5962	30.1458	19.0874	29.2183	48.0816	46.6461	39.7687	33.5515	0	0	0	0	48.2519	108.258	152.161	176.666	184.841	174.72	155.902	132.72	116.053	115.197	118.181	126.068	137.369	141.486	151.152	158.935	164.09	172.317	186.559	195.721	197.577	204.896	218.692	224.025	220.871	214.542	200.903	179.296	161.488	137.426	118.212	99.8135	78.8338	59.8579	49.3759	40.6454
508.05	22.1429	25.0092	26.3281	28.8999	27.931	46.3999	46.1091	39.0983	33.4322	3.37638	0	0	0	47.3279	106.406	149.105	174.099	183.749	172.092	152.283	129.434	113.192	113.213	114.939	123.75	134.093	138.831	147.34	155.753	161.005	168.72	182.4	192.887	194.271	201.755	215.574	219.876	215.767	212.004	196.701	176.019	158.799	135.414	116.191	99.441	78.8484	59.7042	49.25	40.8508
508.95	17.61	31.7579	23.4933	25.5385	26.4328	45.6436	45.6958	38.6997	32.5145	12.3606	0	0	0	46.2331	103.504	146.395	171.64	180.751	168.702	149.381	126.801	112.037	110.542	112.416	120.826	131.963	136.054	144.721	152.636	159.81	165.012	178.675	188.363	191.566	200.186	213.341	216.489	212.636	208.684	193.532	174.65	156.042	133.718	114.668	97.7418	78.3987	59.4085	49.0264	41.2545
510	21.6104	31.2214	19.3489	19.6301	29.2269	43.2059	43.5512	38.674	31.2674	17.4219	0	0	0	44.7171	102.398	144.28	168.446	176.024	164.425	146.496	124.153	110.557	109.1	109.724	117.357	129.231	133.239	141.777	148.561	157.596	161.656	175.908	184.117	187.816	196.333	208.712	211.556	209.134	203.254	189.94	172.742	153.312	132.613	113.478	96.5181	77.7402	59.4624	49.1488	41.4055
511.06	35.5503	25.274	24.3554	20.3512	32.9524	42.0872	41.4964	36.2068	30.321	20.7397	0	0	0	42.702	100.931	142.083	165.13	172.5	162.374	144.301	123.256	107.693	107.063	108.551	114.71	126.094	130.625	138.747	146.675	154.137	158.552	171.689	179.724	184.032	191.429	205.351	208.541	207.372	199.228	187.525	170.087	151.703	130.576	112.508	95.3048	76.9764	59.2298	49.2191	41.3809
511.96	36.2031	23.2635	22.3947	25.5464	30.9462	39.9114	39.8758	34.7079	30.6796	22.5581	0	0	0	41.5818	99.3729	139.869	162.312	170.178	160.567	143.24	120.875	105.976	105.444	106.628	112.179	123	128.53	136.045	143.786	150.929	155.74	169.387	177.224	180.188	186.548	201.829	205.029	202.787	196.718	185.353	166.769	150.28	128.764	110.636	94.9029	76.4372	59.2163	49.1991	41.0701
513.03	27.3551	28.7342	19.3387	22.032	28.2929	39.9101	40.6852	33.1911	30.0918	22.8874	0	0	0	39.3253	97.015	137.781	158.81	167.711	157.943	140.536	118.145	104.194	103.482	104.508	109.871	121.39	125.894	134.144	140.194	147.987	153.297	166.146	174.605	176.402	185.289	198.106	202.419	199.654	194.416	183.586	164.119	148.127	127.007	109.687	94.118	75.922	58.8957	48.8217	40.9601
513.93	18.4049	27.7306	19.6132	12.7051	25.7388	40.3216	41.5683	33.7637	29.1365	22.1443	0	0	0	35.5896	94.7418	134.965	155.166	163.852	155.43	138.349	115.498	101.97	101.528	101.805	107.999	119.322	123.026	131.196	136.087	145.535	150.793	163.539	171.811	173.402	183.205	193.824	198.354	196.391	192.259	180.083	161.781	144.987	125.986	108.882	93.0248	75.3898	58.2428	48.5482	41.2129
515	23.0231	25.0113	22.9824	6.31874	26.4298	39.6702	40.7841	32.7589	27.811	21.524	0	0	0	27.8975	92.557	131.196	151.266	160.75	152.485	135.488	114.109	99.7549	99.3718	98.9434	105.726	115.844	120.148	128.248	133.467	140.801	146.481	158.167	167.679	170.793	179.584	190.655	193.908	193.585	187.852	176.297	159.774	143.011	124.027	107.866	91.6831	74.1325	57.955	48.4214	41.2808
516.06	26.0408	24.4486	27.2859	10.3655	23.0428	37.893	39.5938	31.8931	26.6632	21.1832	0	0	0	17.9833	91.0377	128.336	148.182	158.92	149.144	132.985	112.067	98.2318	97.1144	97.0196	103.376	112.42	118.532	125.677	131.579	137.454	142.702	156.105	163.641	167.984	174.804	188.44	190.854	189.51	183.973	173.136	156.976	142.078	122.105	105.991	90.6071	73.292	57.891	48.5887	41.288
516.96	27.2976	24.3634	18.8286	16.9653	24.899	36.088	38.1746	30.4888	25.7016	20.0685	0	0	0	0	89.5336	125.865	145.888	156.861	145.167	129.363	109.767	96.0207	94.8749	95.2136	102.238	110.56	117.455	123.502	129.451	134.116	139.651	153.796	160.498	163.902	171.818	184.064	188.199	186.974	180.48	170.297	154.907	140.561	120.63	104.473	89.9239	73.1227	57.6935	48.3569	41.3195
518.03	22.5231	24.5583	16.5518	15.9656	20.1109	36.9408	36.9517	30.6473	24.8941	18.8682	0	0	0	0	88.1836	123.662	143.982	153.444	142.77	127.373	107.189	93.2677	93.1661	94.262	100.545	109.029	115.096	121.307	126.637	132.198	137.998	151.389	157.691	160.654	168.585	179.263	184.165	183.732	177.35	167.697	153.106	137.253	119.432	103.459	89.456	72.887	56.9638	48.363	41.4231
518.93	22.9008	27.337	10.9727	7.42955	18.7523	35.7268	36.0859	29.1323	23.928	18.3127	0	0	0	0	85.2179	121.283	141.647	150.061	139.731	125.45	105.246	91.5975	91.841	92.375	98.488	107.435	110.892	117.93	123.317	129.283	134.863	147.349	154.928	158.081	164.985	175.05	179.977	180.355	174.247	164.811	149.927	135.051	118.062	101.892	88.6661	72.2038	56.5482	48.3535	41.197
520	17.754	22.6219	16.9909	6.45165	16.6234	33.9357	35.0892	28.1412	22.7075	17.8357	1.14393	0	0	0	81.8701	118.184	137.769	147.662	137.213	122.095	103.314	89.8157	89.7575	89.8198	96.061	104.641	107.76	114.987	120.24	126.826	131.77	143.794	152.021	155.042	160.448	172.745	176.659	175.948	170.867	161.153	146.324	133.03	115.514	100.487	87.5457	71.039	55.991	48.0313	41.0067
521.04	19.9141	12.8641	8.33821	15.1432	16.6034	31.0881	33.7353	26.4951	21.5513	16.7958	5.16701	0	0	0	77.6942	116.251	135.506	144.361	135.091	118.98	101.968	87.0722	87.6465	87.7142	95.3993	102.408	106.108	112.281	117.415	123.851	128.619	141.375	149.279	151.209	156.76	170.192	173.991	172.297	168.721	158.925	143.692	130.816	113.434	98.6637	86.1915	69.9526	55.6119	47.469	41.0218
521.94	15.9552	14.9723	9.52992	17.1261	13.6094	30.955	33.2303	26.3051	20.4553	16.3576	8.08451	0	0	0	75.465	114.29	132.972	141.593	132.692	117.136	98.9926	85.2506	85.6683	86.4366	92.7513	99.8296	104.009	110.215	114.966	121.118	127.145	138.938	146.299	147.089	153.593	166.982	169.933	168.512	164.962	156.561	142.269	127.714	111.425	97.423	85.1716	69.2164	55.3827	47.2891	41.2376
522.98	17.2439	16.4283	10.7722	13.4414	13.5991	30.4994	34.1111	26.8677	19.9865	16.3805	9.29431	0	0	0	72.2365	111.942	130.189	139.021	130.511	116.024	96.2413	83.7122	84.1093	84.8334	90.5313	98.0528	101.213	108.681	112.251	118.499	125.402	136.084	142.392	143.396	150.893	162.696	166.763	165.132	161.911	153.614	140.209	125.821	109.824	96.0832	83.9565	69.039	55.2299	47.3757	41.3825
524.02	16.2994	17.1844	18.2005	6.38017	16.2229	30.5506	33.0414	26.5902	19.7451	15.8057	10.4483	0	0	0	67.9137	108.191	127.105	136.013	127.151	112.739	94.5774	82.4791	82.0192	82.2563	87.9921	95.1801	98.5979	106.143	110.118	116.048	122.961	132.224	138.568	140.494	148.308	159.735	163.903	162.523	158.632	149.671	137.788	124.542	107.94	94.9029	82.7184	68.2728	54.9989	47.3527	41.4696
525.07	20.1781	7.24294	10.6395	8.33604	19.8436	29.7608	31.5347	25.6987	19.444	14.9899	10.7777	0	0	0	61.4428	106.653	124.897	131.638	125.324	110.043	93.5669	80.1303	80.1773	80.3462	86.0576	92.8657	97.0647	103.366	107.252	113.463	118.89	129.273	135.752	138.235	145.513	156.778	160.577	159.455	157.007	147.55	133.987	122.767	105.96	93.5803	81.8162	67.8735	54.6889	46.9538	41.3879
525.97	8.14404	4.96158	7.69403	11.772	20.3333	29.1715	30.2408	24.3925	18.3735	13.9977	11.2735	0	0	0	53.4178	104.729	122.518	128.964	122.035	108.058	91.3888	78.058	78.6942	78.636	83.8561	91.0257	95.1907	101.171	105.872	110.724	115.224	126.218	133.403	135.869	142.036	154.706	156.787	155.878	153.688	145.232	130.862	120.575	104.628	92.3421	80.9878	67.0762	54.0673	46.6826	41.1277
527.01	0	8.02601	1.3442	11.7745	18.1198	28.4001	30.1031	24.2885	17.9048	13.0793	11.2453	0	0	0	42.1851	102.221	119.619	126.608	119.943	106.132	88.9942	76.8289	76.6826	76.7642	81.3963	88.9796	93.0748	99.6298	103.325	109.181	112.275	123.566	130.472	132.515	140.211	151.447	152.817	152.646	150.625	142.35	128.378	118.754	103.092	91.2417	80.0344	66.1989	53.3292	46.3936	40.4459
528.05	0	20.9018	0	2.73143	14.0125	27.476	28.6694	23.0388	17.3398	12.5894	10.9313	0	0	0	29.5956	99.0005	116.901	123.864	116.497	103.556	87.0105	75.8609	75.1696	75.4186	78.8443	87.2997	90.0765	96.0208	101.058	107.81	109.824	120.48	127.229	129.687	137.565	148.421	149.958	149.343	147.701	139.339	127.603	116.86	101.14	89.8648	79.0273	65.1393	52.3588	46.2306	40.2593
528.95	0.645562	6.09315	0	0	12.0185	26.3573	27.9977	23.5368	17.2741	12.6245	10.9145	0	0	0	15.755	97.417	114.358	121.644	114.423	101.879	85.5681	74.3746	73.4575	73.5602	77.6419	86.1439	87.7781	94.1065	98.374	105.097	107.934	118.154	125.166	126.208	132.864	144.634	147.04	146.147	145.131	136.258	125.437	113.938	99.116	88.4364	77.4319	64.5641	51.6164	45.5091	40.1217
530	0.399171	0	0	1.24632	11.3377	26.0769	28.0424	23.4231	16.2635	12.376	10.3941	3.06026	0	0	0	94.8295	111.988	119.537	111.436	100.106	83.1771	72.5349	72.2888	71.6677	76.7875	84.4878	86.3204	92.7094	96.9187	101.857	106.028	115.37	122.564	123.291	130.457	140.948	144.695	142.764	141.921	133.217	123.184	111.047	97.8353	87.1825	76.016	63.6002	51.3127	45.2303	39.9426
531.04	0	0	0	0	12.722	26.2559	28.3574	22.8069	16.3089	12.3637	10.9409	6.77615	0	0	0	92.2868	109.568	117.101	108.699	97.3812	81.0425	70.7782	70.3958	70.565	75.19	82.4137	85.1858	91.15	94.9652	99.9734	104.343	113.396	119.48	120.614	128.157	137.664	141.48	140.716	139.536	130.67	120.559	108.749	96.3987	85.8951	75.1436	62.648	51.4853	44.8048	39.6082
531.94	0	0	0	0	12.7791	27.4455	28.0634	21.7056	17.0437	12.7386	11.6134	9.1771	0	0	0	89.5979	106.684	114.316	106.578	94.8424	79.5796	69.3202	68.8171	69.7808	73.8799	80.1759	82.958	87.9863	93.1281	97.9626	101.386	110.523	115.563	118.608	126.253	135.419	138.058	138.346	137.105	128.865	118.099	107.216	94.0406	84.3459	74.5177	62.0507	50.982	44.5431	39.4676
532.98	0	0	0	0	12.6692	27.8723	26.9736	22.9179	18.2935	13.2467	11.8654	10.5535	0	0	0	85.496	104.484	111.171	104.488	93.0887	78.5058	66.7755	66.9963	67.6733	73.1078	78.1944	80.1192	86.2211	90.5255	95.0618	98.6148	106.958	112.528	115.816	123.089	133.665	134.618	135.208	133.386	125.754	115.524	105.353	92.2423	82.7167	73.0949	61.0632	49.7719	44.0653	39.4231
534.02	0	0	0	0	9.66247	27.162	25.1554	24.5148	18.773	13.1256	11.4041	12.2813	0	0	0	79.8019	102.7	107.663	101.394	91.2217	77.2629	65.3071	65.6098	66.1646	70.9085	76.5069	78.9085	84.8872	88.8377	92.5257	95.2345	103.869	110.511	113.012	121.224	130.436	132.177	132.036	129.901	123.552	113.19	103.564	90.1496	80.8694	71.8486	59.7636	48.73	43.6999	39.0043
535.07	0	0	0	0	9.75645	24.922	25.5987	25.2113	19.2781	13.8116	11.2711	13.0325	0	0	0	72.9531	101.44	105.695	99.7521	89.6021	75.8597	64.5077	64.6016	65.3192	68.9433	74.4219	77.7645	82.9498	86.9388	90.5937	93.4312	102.119	109.299	110.639	117.642	127.075	129.882	129.856	126.619	121.255	110.427	100.949	88.6924	79.5737	71.2575	58.9352	48.2885	43.1628	38.5723
535.97	0	0	0	0	9.74693	25.3272	26.7059	24.521	20.7514	15.0073	12.7328	13.9791	0	0	0	65.1931	98.8997	103.685	97.9654	87.2365	73.6562	63.8803	63.2442	63.8849	67.5343	71.974	76.2089	80.9845	85.0036	89.244	91.6032	101.039	107.597	108.754	114.484	123.494	126.962	127.295	124.704	118.511	107.714	99.0948	87.1556	78.2781	70.2678	58.3773	47.6785	42.6381	37.9196
537.01	0	0	0	0	9.01182	25.323	27.5747	24.7408	22.761	16.7951	14.0116	14.8929	0	0	0	52.9284	95.894	100.853	95.676	84.69	71.7684	62.2638	61.3896	61.9317	65.9323	69.885	74.1245	79.1387	81.9515	86.9132	90.4183	98.9833	104.464	106.525	110.964	120.402	123.879	123.501	121.882	115.301	106.307	97.3648	86.1495	77.1264	68.75	57.4973	46.7926	42.1258	37.5922
538.05	0	0	0	0	8.19461	24.8349	26.6533	25.7427	24.3113	17.9702	15.7485	17.473	0	0	0	38.5176	93.3171	98.4936	92.818	83.2115	70.2532	60.8137	59.9201	60.6706	63.9626	69.3358	72.4449	76.9993	80.2133	84.383	88.6066	96.4645	101.259	103.718	109.011	117.278	121.26	120.04	119.637	112.908	105.228	95.5237	84.4349	75.4026	66.88	56.0171	46.1223	41.6284	37.132
538.95	0	0	0	0	7.27124	24.803	27.5473	28.8692	25.2025	19.4805	16.3943	20.3623	10.0278	0	0	20.314	90.692	97.2615	91.6351	81.9766	68.3976	59.575	58.5096	59.5195	62.1591	68.1993	70.4911	75.0272	77.9135	82.227	87.2361	93.2688	98.8029	101.066	107.029	114.812	118.172	117.406	117.167	110.645	102.772	93.2857	82.5486	73.9451	65.501	55.3446	45.6951	41.3135	36.6488
540	0	0	0	3.17798	8.11716	26.3058	28.095	31.1091	27.6423	22.6566	19.4905	23.8461	19.2279	0	0	0	88.1785	94.5771	89.1503	79.6376	65.8896	57.4339	57.2735	57.1571	60.9224	66.8645	68.282	72.9244	75.8951	80.4758	85.0127	90.4972	96.151	98.6748	104.88	111.438	114.683	114.731	114.931	108.463	99.7321	90.915	80.0342	72.6373	64.0772	54.7278	45.0365	40.3891	36.1578
541.04	0	0	0	5.6242	9.78133	26.9733	29.631	31.5942	30.6721	26.3221	22.7998	26.9486	26.719	0	0	0	84.5149	92.1766	86.3311	76.7336	64.3335	55.8231	55.9057	55.4016	59.8249	65.4761	67.5061	72.2188	74.2348	78.8771	82.2317	88.6517	93.7853	95.9083	101.24	109.057	112.511	112.199	112.346	106.471	97.8058	89.4053	78.8578	71.0425	63.2627	54.0609	44.2876	39.5649	35.7452
541.94	0	0	0	5.39712	13.6637	26.8832	30.5213	30.858	34.619	29.3019	25.8578	30.8783	32.546	0	0	0	80.7548	89.9111	84.5351	75.088	63.7789	54.8835	54.9344	54.4058	58.7962	64.2491	66.0248	70.6304	72.9796	76.9789	79.9154	86.7836	92.1689	93.3559	98.7068	106.801	110.118	109.928	109.483	104.199	95.8493	87.6078	77.834	69.8163	61.9817	52.7446	43.7136	38.7533	34.9561
542.98	0	0	0	6.07729	14.1889	27.373	31.7498	33.1559	38.378	33.0479	29.0982	35.3439	37.4036	0	0	0	76.41	88.5233	83.4483	72.9575	62.4442	53.4986	53.3635	53.6291	57.5588	62.3759	64.0964	69.4311	70.5988	74.8121	77.6075	85.6023	90.5018	92.0322	96.6566	104.859	107.576	107.257	107.29	102.146	94.1008	85.5549	76.2365	67.8599	60.9442	51.5582	42.7514	38.3394	34.4474
544.02	0	0	7.69232	8.83539	14.0586	27.7431	32.7306	37.054	42.1828	38.1919	33.9803	40.5073	42.8422	0	0	0	70.4814	85.58	81.5439	71.0899	60.6121	52.3949	52.5172	51.9302	55.4209	60.8521	61.9314	66.3745	68.4471	72.4041	75.8136	83.4059	87.716	89.6087	94.3719	102.513	104.632	104.886	104.448	99.7069	91.6001	83.2165	73.8053	66.3431	59.5675	50.3969	41.9861	37.5866	33.9578
545.07	0	0	12.66	9.8281	19.1273	29.4972	33.6383	40.3641	45.7496	43.9495	38.7122	44.0177	47.6193	0	0	0	61.0868	83.0862	79.0828	69.8946	59.657	51.7799	51.4274	50.8647	52.9426	59.3227	61.2795	64.2	67.3547	69.8359	74.0368	80.729	84.5856	86.5579	91.4157	100.256	102.31	102.306	102.373	96.9307	89.4366	81.6846	72.4445	64.6646	58.4201	49.5732	41.3518	37.0789	33.4995
545.97	10.9089	3.34403	10.1078	20.2494	26.1743	31.0208	34.4397	41.514	50.3841	48.2282	42.3332	46.7582	51.977	0	0	0	49.5079	81.0206	76.7824	68.7856	58.6959	50.5764	50.1967	49.9723	51.2641	57.6471	59.6072	62.4594	66.6977	68.3219	72.3024	78.0072	82.4766	83.8404	88.8435	97.2019	99.4805	99.8939	99.8011	93.6302	86.4975	80.164	70.7346	63.7603	57.014	48.6275	40.609	36.4882	32.8763
547.01	9.05384	18.5976	11.3815	28.0571	30.0111	33.6928	35.9159	42.1908	54.8144	51.7149	46.1896	49.4374	55.3611	11.1399	0	0	36.9935	79.5499	74.3195	66.7862	57.2333	48.7452	48.2238	48.4222	50.9214	55.6125	57.8602	61.3617	65.3355	67.0941	69.9995	76.3895	80.6294	82.556	87.4848	93.7874	97.49	97.8817	97.4086	91.3571	83.8215	78.2588	68.7293	62.5345	55.938	47.675	39.4087	35.4981	32.4239
548.05	15.4721	29.9099	16.6082	23.7761	25.9965	34.582	37.0782	41.8417	56.5731	54.0331	48.3536	51.6834	57.8774	30.665	0	0	22.7194	77.44	73.1528	64.9402	54.8611	47.4884	47.1102	46.9846	49.8758	54.4264	57.1063	60.3354	62.7485	66.4877	68.1304	74.3457	79.2553	81.2462	84.9888	91.4119	96.1043	95.9146	94.1844	89.2942	82.2843	76.5248	67.1907	61.353	55.0938	46.6458	38.752	34.8935	31.7993
548.95	11.796	28.9661	20.5236	15.4303	22.8577	35.5924	36.9	43.4047	57.4421	55.3486	50.0062	52.7874	59.8443	43.3487	0	0	5.19289	74.8499	71.5989	63.7776	53.7619	47.2928	46.213	46.3348	48.717	53.6628	56.2383	58.8769	61.2982	64.2833	66.4063	72.8942	77.4291	79.4468	82.7909	89.4801	93.717	93.2045	91.9483	88.0836	81.5837	74.6328	66.2447	59.6713	54.043	45.6852	38.1327	34.5822	31.3009
550	20.5885	26.0072	20.5616	15.7971	24.6894	33.617	36.2879	45.0954	58.1282	57.4873	52.561	54.2699	62.013	52.554	0	0	0	72.1898	69.9869	62.2841	52.4046	46.245	45.4618	45.2701	47.4942	52.6753	54.3843	57.5966	60.2396	62.3362	64.594	71.637	75.3723	77.1649	81.5978	88.0545	89.8275	90.3972	89.3456	85.8906	80.2181	72.5812	64.6985	58.1899	52.7743	44.3263	37.2211	34.4037	30.8752
551.04	5.72973	23.2765	20.257	18	28.1031	32.9611	36.7556	46.6103	58.5473	58.6205	53.5612	55.7557	63.2536	58.5227	0	0	0	69.8804	66.9613	61.0513	51.3977	44.1786	44.4023	44.2457	46.7874	51.1293	52.6116	55.6381	59.0595	60.5539	63.4331	70.128	72.9872	74.4298	80.124	86.3318	87.4875	88.3959	87.2867	83.5726	77.9323	70.9187	63.089	57.3588	51.3212	43.624	36.1999	33.3321	30.2512
551.94	15.7049	14.0212	18.2037	19.7165	27.4155	32.4873	37.3246	46.2531	57.7896	59.8721	54.1692	56.4981	63.9726	61.1091	0	0	0	67.1975	65.5577	59.8083	49.9414	42.7123	43.2445	43.0064	45.946	49.7641	51.4731	54.467	56.8113	59.5143	61.8633	67.9981	71.3558	72.6038	77.2193	84.3999	85.852	86.0362	85.3769	81.8483	75.7728	69.2594	61.4234	56.5004	50.2911	43.1217	35.6904	32.3592	29.6795
552.98	23.3559	16.4208	16.8028	21.5133	25.1831	33.0647	38.129	47.0687	59.2513	60.1801	54.8124	57.0867	65.7337	63.1697	0	0	0	63.6059	63.6083	58.3919	48.4269	42.0255	41.9465	42.0446	44.6497	48.2657	50.1286	53.1821	55.4703	58.1796	61.1504	66.4827	69.6837	70.7159	74.4202	82.1779	84.2557	83.9575	84.4083	80.362	74.0895	67.7821	60.0967	55.3153	49.3502	42.7164	35.2265	31.7629	29.2068
554.02	21.6112	23.1321	22.0581	21.8662	26.775	32.1374	37.9945	46.7364	60.5744	61.1901	56.383	58.3468	66.7525	64.9425	0	0	0	58.693	62.4447	56.3636	47.7939	41.0714	41.0225	40.9654	42.8374	46.5228	48.9393	51.8591	54.1665	56.4597	59.1683	65.1067	68.4218	69.0504	72.4925	79.9208	82.3659	82.1974	81.9243	78.2874	72.1601	66.3229	58.6683	53.7109	48.4088	41.6625	34.4439	31.3732	28.567
555.07	12.6578	23.7427	24.5982	23.1987	29.0816	32.6276	38.5389	47.4244	62.7295	62.3971	57.828	59.8952	68.1148	65.8794	0	0	0	52.8738	60.8767	54.8798	46.7122	39.9555	40.213	40.2856	42.0857	45.9235	47.6668	50.1881	52.9462	54.6816	57.9694	63.3751	66.4725	67.6245	71.1899	77.4882	80.4681	80.3245	80.1035	75.5376	70.6812	64.6527	57.489	52.2029	47.1178	40.6459	33.8565	30.6867	28.0354
555.97	4.35183	16.3742	26.5793	24.5308	29.1206	34.0393	39.4555	48.6418	64.5787	64.0572	60.1957	62.3147	70.6345	67.2495	9.11283	0	0	44.9818	60.3146	53.2609	45.6335	39.4082	39.6133	39.5898	41.5731	45.7831	46.8477	49.068	51.3907	53.3493	55.8321	60.9089	64.7657	66.3333	69.6037	75.1572	77.8658	78.0555	77.7102	73.5566	68.5432	62.7083	55.8808	50.8906	46.3171	39.3822	32.9786	30.0686	27.5806
557.01	10.1807	17.5731	27.6047	27.1115	26.7425	34.6162	39.6441	50.3077	67.2094	66.2644	63.0397	65.6052	73.3692	69.7787	30.6702	0	0	33.8923	58.1587	52.2623	44.1032	38.8617	38.2428	38.1617	40.8186	45.2203	45.5512	48.3282	50.2682	52.5147	54.6167	59.2985	62.5441	64.4424	68.159	73.7028	75.3567	75.8081	75.6418	71.9692	66.0847	61.3462	54.2522	50.1209	45.2524	38.502	32.2164	29.4585	27.0205
558.05	9.53892	16.2568	30.6615	22.9597	27.4656	33.977	39.3678	50.6391	68.987	68.6522	65.1807	68.5061	75.4985	72.022	45.7813	0	0	20.3653	56.114	51.0428	43.4044	37.3578	37.304	36.8143	39.794	43.6243	44.3159	47.0285	48.293	51.2527	52.9747	57.9031	61.1761	62.676	66.5822	72.2283	73.2686	73.8804	73.2111	71.0424	64.3836	60.2632	53.051	49.1543	44.0451	37.7615	31.4098	29.0015	26.4116
558.95	26.6252	11.3358	29.7808	23.1927	27.6885	33.9719	39.5164	52.0131	71.0508	71.755	67.827	71.63	78.0867	73.4181	55.3908	0	0	3.34354	54.156	49.8569	42.3236	36.4025	36.1839	34.9725	39.1837	42.9397	42.7144	45.4446	46.8228	49.6387	51.8038	56.7793	59.2723	60.5999	65.1033	70.5619	71.1367	71.9439	71.8686	69.2533	63.9232	58.6479	52.0413	47.9453	42.6935	36.9072	30.9026	28.4837	25.8467
560	35.0114	8.13325	26.4251	22.8161	31.2765	35.8767	41.1979	53.2257	73.9203	75.035	70.4824	74.7116	80.4359	75.2316	62.36	0	0	0	53.1202	48.3142	41.3616	35.2205	35.6064	34.8815	38.0829	41.6837	42.2427	44.179	46.2369	48.238	50.4432	55.2094	57.9415	59.0317	63.3209	68.2236	69.738	70.1657	70.2569	66.7678	62.662	57.3192	51.0302	46.8894	42.1295	36.1421	30.1978	27.9511	25.4329
561.04	32.9488	10.131	29.1868	30.3043	35.6029	37.4086	41.301	54.781	75.1069	76.4794	72.5312	75.9955	82.0265	77.3866	67.4154	0	0	0	51.09	47.0136	40.1935	34.7137	34.8869	34.2372	37.432	40.1163	41.8681	43.2561	45.7175	47.1605	48.9424	53.6224	56.6317	57.6168	61.8453	66.4915	68.4148	68.6721	68.9929	64.6577	60.8689	56.1243	49.795	45.6818	41.4791	35.3665	29.5003	27.1865	24.8583
561.94	22.8523	5.75361	32.7097	29.8078	37.5081	38.2138	42.6652	55.7163	75.6241	77.1389	73.7958	76.2306	83.6915	78.658	69.4304	0	0	0	48.5198	45.1474	38.9643	33.8131	34.2938	33.9749	36.1997	38.4552	41.3518	42.0659	43.8587	46.2204	47.7757	52.1467	55.3558	56.9273	60.2492	64.6809	66.6555	66.8785	67.227	63.6342	58.9969	54.608	48.3904	44.2806	40.9581	34.6795	28.9365	26.5682	24.3841
562.98	21.3354	12.2575	36.0646	30.4119	37.7328	37.2754	42.6294	55.7599	75.2454	78.4746	74.1575	75.6551	84.5655	78.2475	70.8578	0	0	0	44.7892	44.2035	37.6941	33.1287	33.1294	33.014	35.0654	37.8252	39.7929	41.0529	42.3773	44.935	46.4188	51.027	53.8314	55.236	58.0167	63.47	65.3215	65.352	65.5466	62.7192	57.3405	53.1471	47.181	42.9761	39.8013	33.678	28.4716	26.0354	23.8445
564.02	20.7686	10.3262	25.1279	21.0454	33.1431	37.6562	42.783	54.2928	74.9783	79.863	74.4204	75.5242	84.4042	78.6258	71.9549	0	0	0	39.5261	43.452	36.7786	32.0862	31.9652	32.5969	33.5786	37.4441	38.471	39.7322	41.5567	43.5561	45.2007	49.6421	52.0941	53.4929	55.827	61.4333	63.7159	63.29	62.8929	61.0045	55.7524	51.9191	46.1134	42.4626	38.538	32.8382	27.7325	25.6658	23.3506
565.07	15.5991	11.4734	26.4903	29.9375	30.6227	37.1233	42.0216	53.6099	74.3839	79.1946	74.0626	75.1425	83.2103	79.1685	73.0605	0	0	0	32.6272	42.5229	35.6168	31.2303	31.297	31.7726	33.3455	36.8122	36.8401	38.5305	40.4846	42.5678	44.2202	47.7626	50.8195	51.8141	54.3842	59.879	61.5956	61.4194	61.2949	58.8529	54.5432	50.5814	45.124	41.5741	37.265	32.0079	27.1612	25.1944	22.7453
565.97	19.2876	6.13657	29.3959	26.147	28.9916	38.3491	42.1146	53.7696	74.4743	77.2566	73.3815	75.64	81.6336	79.3364	73.2465	0	0	0	24.5145	40.9143	34.9339	30.3532	30.827	30.6735	32.9058	35.5902	36.0902	37.879	39.39	41.723	43.0688	46.4968	49.434	50.7919	53.588	58.0137	59.479	59.5571	59.2672	57.0696	53.4179	49.4428	43.9794	40.5413	36.4211	31.4817	26.3648	24.6094	22.3018
567.01	24.9683	12.3823	30.9464	21.6906	32.9568	37.8846	41.7565	53.1083	74.0273	75.994	72.3962	73.9887	79.4692	77.5485	72.7093	13.0639	0	0	14.1345	39.6959	34.1851	29.4812	30.0272	29.9115	32.385	34.4378	35.7035	37.5389	38.6237	40.2639	41.7733	45.3702	48.3514	49.4146	52.5812	57.0129	58.2689	58.3326	58.1199	55.8354	52.0018	48.2072	43.0915	39.3789	35.6994	30.8702	25.7304	23.7764	22.1667
568.05	22.9068	8.2016	25.5415	16.6241	33.1109	37.9683	41.1809	53.1102	72.7451	75.5411	71.362	71.8472	78.091	76.0387	72.1956	30.3868	0	0	0	38.1929	33.5882	28.5681	29.2368	29.4455	30.9409	33.4581	35.072	36.2212	37.7178	39.1101	40.675	44.0764	46.8384	48.0491	51.3018	55.7627	57.1172	57.4164	57.0101	54.5075	50.6139	47.3424	42.1562	38.534	34.8922	30.1579	25.0764	23.2836	21.7221
568.95	21.9462	11.7048	20.1004	24.5882	32.3242	37.3468	40.2477	53.1422	71.5028	74.0857	70.6925	71.4042	76.9916	74.9357	71.9907	42.8422	0	0	0	36.8388	32.3468	28.0677	28.4995	29.2227	30.3778	32.6637	33.7265	34.7834	36.5658	38.4814	40.2689	43.0571	45.5331	47.146	49.4919	54.5904	55.9505	55.9664	55.8308	53.1201	49.2748	46.1989	40.8532	37.427	34.0013	29.2056	24.6942	22.7213	21.218
570	11.0207	13.153	15.5319	28.5623	30.3596	37.4684	40.7694	52.2815	69.4536	72.6351	69.8389	71.2723	75.6988	73.7555	72.0052	50.7207	0	0	0	35.2638	31.1981	27.6092	27.5213	28.3201	29.2821	31.7999	32.7193	34.3123	35.5781	37.7166	39.1582	42.0091	44.2319	45.8359	48.0992	52.7159	54.3791	54.0067	53.7349	52.1207	48.0338	44.6315	39.6439	36.4596	33.2258	28.4585	24.2076	22.5399	20.528
571.02	4.85025	20.1462	7.63763	21.13	32.2363	37.4999	40.8516	50.3968	68.0587	71.0574	69.277	71.0818	73.9239	73.2474	73.2759	57.7846	0	0	0	33.687	30.1878	26.8308	26.5503	27.2876	28.6746	30.7194	32.1871	34.1015	34.9735	36.4516	37.7548	40.4815	43.3024	44.3102	46.7078	51.1184	52.8306	52.1225	51.4614	50.661	46.93	42.95	38.6104	35.5728	32.4678	27.8542	23.5776	22.1015	20.1492
572.05	1.74209	25.6763	14.5262	18.0436	32.434	36.2765	40.5312	49.6186	67.5746	71.1801	67.7108	70.6113	73.2945	73.8357	74.1197	61.7168	0	0	0	31.9307	29.3494	25.7498	25.9427	26.4554	28.3554	30.017	31.389	33.1464	34.469	35.6372	36.4607	39.0999	42.5202	42.958	45.8101	49.431	51.1225	51.3225	50.3511	48.936	45.5478	41.9211	37.8246	34.7763	31.7296	27.3722	23.07	21.8166	19.8414
572.94	10.3889	19.2532	13.5391	20.6494	31.2368	37.8608	40.4431	49.9544	68.1257	70.7232	66.6881	70.3409	73.4194	74.8848	74.6338	63.7636	0	0	0	29.42	28.5322	25.222	25.5798	25.7831	27.4974	29.5677	30.4268	32.1553	33.5573	34.8969	35.9069	38.745	41.7686	41.9455	44.6243	48.4138	49.6682	50.4947	49.6085	47.65	44.4482	41.4396	37.1964	33.691	30.8507	26.8539	22.4872	21.0479	19.5684
573.97	3.21058	9.93112	16.7715	24.1909	26.5028	38.1655	43.1053	51.3121	68.1695	70.874	66.0242	69.356	74.26	74.0953	75.1641	65.0922	0	0	0	24.7946	27.5131	24.8419	24.7749	25.3472	25.9582	28.8413	29.5999	31.2286	32.4162	34.0157	35.394	38.0704	40.4402	40.4957	43.5627	46.8422	48.6022	49.1244	48.4194	46.5321	43.2034	40.2019	36.1641	32.8737	30.2237	26.0691	21.998	20.696	19.0618
575	0	2.4344	14.269	20.7203	29.8096	40.2906	43.7851	52.0088	68.1246	69.8553	67.7911	69.7399	75.5541	74.8861	76.9273	67.3521	0	0	0	18.1704	26.644	24.0184	23.7627	24.5568	25.0368	28.2981	28.6386	30.6523	31.1991	32.8449	34.6772	37.2051	39.1178	39.0767	41.985	45.514	46.9011	47.1706	46.6794	45.2952	42.0814	39.1766	35.0994	32.0618	29.3646	25.2758	21.5222	20.0304	18.5122
576.02	0	11.7079	21.4225	22.6562	33.7548	39.6073	44.4952	51.5696	67.9783	70.1464	67.8008	71.9319	76.2834	75.4265	78.2567	69.3026	0	0	0	9.45236	25.9912	23.2261	22.8736	23.4236	25.112	27.6709	28.1543	29.8035	30.459	31.8683	33.6182	35.8014	37.6249	38.0888	40.6194	43.9433	45.7139	45.7063	45.7379	43.6159	40.8266	38.0268	33.809	31.5685	28.6666	24.7785	21.1565	19.5971	17.8248
577.05	15.4204	17.1382	17.6483	30.8547	34.837	39.891	45.2778	51.237	67.8866	70.2699	67.276	72.1968	76.6074	75.8596	79.2169	70.8299	10.9764	0	0	0	25.5869	22.6341	22.2988	22.7094	24.656	27.2296	27.3133	29.0281	29.5002	31.0962	32.4646	34.8026	36.797	37.2371	39.4532	42.9862	44.5943	44.378	44.876	42.627	39.8913	37.1454	33.2471	30.4061	28.0002	24.312	20.78	19.1415	17.3723
577.94	20.7728	19.5422	23.4212	31.9442	35.357	41.0865	46.0285	52.0163	67.9701	71.2815	67.104	71.1362	76.8128	75.6513	80.1912	72.2586	29.4628	0	0	0	25.0545	22.1257	21.833	22.6824	24.1486	25.7898	26.6008	27.8661	29.1154	30.4191	31.9862	33.7189	36.1984	36.292	38.5869	41.7226	43.6327	43.5048	43.5657	41.3203	38.6957	36.2771	32.4872	29.6215	27.2528	23.6175	20.2172	18.9012	17.2179
578.97	19.2859	12.5858	21.3661	27.6808	37.0924	43.7274	45.9737	51.7417	66.4578	70.143	67.2113	69.9558	77.0292	75.8416	80.4365	73.2664	42.3954	0	0	0	24.5689	21.185	21.2554	22.476	23.5473	25.0754	25.9941	27.1927	28.4126	29.657	31.2944	33.4305	35.4055	35.2972	37.6461	40.8608	42.301	42.2423	42.6444	40.7466	37.7441	35.3615	31.9606	28.7094	26.6533	22.9592	19.4611	18.4356	17.0481
580	12.0357	12.2627	14.8116	24.7352	37.5485	44.6201	46.1829	50.7365	65.3335	68.2509	65.781	70.0493	76.2751	74.8656	80.1898	73.9497	51.7678	0	0	0	23.2388	20.5936	20.5374	21.671	22.7712	24.5797	25.3094	26.5156	27.6411	28.8454	29.8909	32.5955	34.0528	34.4323	36.8875	39.7697	41.2511	41.0991	41.9558	39.4814	36.8957	34.4781	30.9149	28.1865	26.0349	22.5359	18.9856	17.9014	16.4861
581.02	12.3656	14.6523	13.3355	23.0044	34.7598	43.8512	45.9707	50.2164	63.7315	66.4474	64.3844	68.4735	75.115	72.3071	79.1923	74.3094	57.5251	0	0	0	21.5525	19.9524	19.937	20.6743	21.9149	24.2454	24.5298	25.5614	26.9138	27.6591	28.8844	31.123	32.8013	33.7551	36.0212	38.8402	40.0612	39.6914	40.6413	38.596	35.9234	33.0809	30.1797	27.4334	25.5336	21.9375	18.6022	17.3785	15.9856
582.05	15.8059	20.6294	28.1892	23.3955	37.6194	44.3963	45.1402	49.6365	63.5466	65.6118	63.2859	66.0793	73.5632	71.3587	79.665	74.5842	61.5234	0	0	0	19.6037	19.4326	19.406	20.1236	21.3473	23.2954	23.5401	24.7785	26.1938	26.588	28.3006	30.0507	32.0234	32.5065	34.9614	37.7859	38.5161	38.5293	39.1866	37.6684	34.9803	32.2614	29.2086	26.9485	24.82	21.3695	18.147	16.9679	15.6627
582.94	19.5797	26.832	24.6635	24.1961	38.7061	44.2492	43.8134	49.5611	62.1664	63.9405	61.4758	64.0162	71.4295	70.9218	80.4933	75.8211	63.34	0	0	0	17.5334	18.827	19.2325	19.6454	20.8648	22.3675	23.4158	24.4106	25.3212	26.1628	27.3255	29.6407	31.2642	31.4895	33.8533	36.7379	37.206	37.3333	37.885	37.0986	33.7382	31.6018	28.4389	26.0714	24.1146	20.9339	17.6781	16.5498	15.3302
583.97	23.4481	25.3223	13.2255	18.81	36.089	42.4615	43.3615	47.6656	59.7301	61.9754	60.0201	62.4908	69.3294	69.34	80.7481	76.9081	64.9318	0	0	0	14.1584	18.3603	18.7133	19.4572	20.1582	22.1003	23.2066	23.9666	24.4667	25.8435	26.5169	29.1655	30.4058	31.1095	32.8297	35.5226	36.5211	36.8114	36.5661	35.8114	33.0561	31.0761	27.5989	25.2895	23.5553	20.4817	17.3302	16.1194	15.0972
585	23.0378	18.7046	11.2454	14.2231	32.3581	41.3854	43.4314	46.2907	57.0271	59.7078	58.6512	60.9221	66.2216	67.03	79.4175	78.3192	66.703	0	0	0	8.96786	18.2713	17.8627	18.9312	19.7974	21.995	22.7585	23.4396	24.0183	25.1166	26.0231	28.057	29.5275	30.5293	31.8803	34.6563	35.5069	35.8747	35.5808	34.2908	32.2015	30.0846	27.0803	24.651	22.7756	19.8416	16.9133	15.7582	14.6787
586.02	24.4563	15.0131	11.7845	17.046	32.4843	42.9964	44.1104	44.7764	55.642	58.1228	56.5868	59.0808	64.7533	66.5728	78.5055	78.8686	67.6647	0	0	0	1.94937	17.7741	17.5431	18.2627	19.5082	21.3042	21.7259	22.9878	23.0893	24.4077	25.3669	27.0763	28.4549	29.3812	30.9277	33.8401	34.5489	34.8127	34.7079	33.2484	31.499	29.338	26.4514	24.152	22.2196	19.1702	16.3545	15.5531	14.1496
587.05	15.1952	18.3439	17.426	17.9954	33.8732	42.6394	43.4452	44.3732	54.9894	56.3299	54.3941	57.4578	63.2591	65.9151	77.677	79.1575	67.1202	12.145	0	0	0	17.1134	17.8491	17.4355	18.9095	20.6381	21.0871	22.2833	22.3311	23.7436	24.4546	26.4824	27.7679	28.5031	30.071	32.8465	33.1675	34.1225	33.873	32.3043	30.4903	28.6184	25.6899	23.5531	21.7249	18.6753	15.9444	15.3218	13.7455
587.94	3.66655	22.3703	16.8724	12.0648	33.8908	41.9232	42.6384	42.4599	53.1152	54.5902	52.7068	55.7251	61.9023	63.9713	76.6978	79.3053	66.7754	24.7369	0	0	0	16.5259	17.6305	16.9589	18.4412	20.0795	20.3619	21.4996	22.0027	22.7444	24.0966	25.8428	27.2738	27.8422	29.7234	31.9751	32.5121	33.5327	33.0788	31.5402	29.7234	27.9803	24.8534	22.8077	21.2222	18.3279	15.5922	14.7593	13.656
588.97	13.3434	22.3967	13.725	13.3005	30.8994	43.121	41.8626	41.4905	52.1243	52.5308	51.3142	55.0607	59.7302	62.5015	76.3271	79.5737	67.3455	33.9208	0	0	0	15.9196	16.8639	16.6903	17.9101	19.3752	19.7229	20.6161	21.8801	22.159	23.5194	25.1579	26.6996	27.3598	29.1809	31.2557	31.6399	32.448	31.9974	30.5563	28.9793	27.0056	24.242	22.107	20.4891	17.7844	15.1898	14.1617	13.3756
590	22.126	25.6228	0	18.6259	30.7697	44.9191	42.0181	40.4402	50.4231	51.4825	50.0924	54.4202	58.5826	62.1349	76.1505	79.6765	68.1884	40.3585	0	0	0	14.807	16.1066	16.2867	17.5584	18.8785	19.3175	20.1185	20.8496	21.8075	22.8298	24.176	25.7975	26.3128	28.2216	30.3415	31.1796	30.9399	30.5666	29.9131	28.1639	25.959	23.5113	21.4461	20.003	17.2112	14.8979	13.702	12.94
591.02	18.667	20.6111	9.80697	21.1101	32.3423	44.6595	42.9459	39.6675	48.9433	51.2348	48.9238	53.4058	58.2557	60.7515	75.8827	79.4675	68.6327	43.6773	0	0	0	13.4606	15.3706	15.7312	17.1877	18.3125	19.103	19.8565	20.0404	21.2687	22.3878	23.3803	25.1088	25.2943	26.9556	29.4679	30.297	29.981	29.7736	29.02	27.2327	25.0615	22.5939	21.1218	19.509	16.8447	14.5274	13.4335	12.5027
592.05	13.798	21.0031	8.29942	17.4884	32.773	42.9193	42.8568	39.9566	47.3906	50.2966	46.8353	51.9733	57.4606	59.8836	75.65	79.1879	68.5809	45.1968	0	0	0	12.1128	14.5779	15.2648	17.0759	17.9707	18.3468	19.537	19.6428	20.5755	21.4771	23.0963	24.6085	24.6968	26.3413	28.4456	29.3188	29.3101	29.6942	28.3691	26.499	24.5612	22.0051	20.6542	18.8793	16.6464	14.1002	13.0856	12.3717
592.94	15.3769	12.2874	9.59992	12.3121	31.6006	43.6287	42.2119	40.3377	46.1041	48.7222	46.2033	50.582	56.4346	59.4286	75.7612	78.7673	68.797	46.2428	0	0	0	9.13345	14.2021	15.121	16.4266	17.1166	17.5603	19.0261	19.6992	20.2873	20.8353	23.005	24.0139	24.5653	25.8173	27.7038	28.39	28.7533	29.058	27.6919	25.7599	24.2529	21.4135	20.1848	18.33	16.221	13.7768	12.9588	12.1643
593.97	13.778	15.072	8.51199	9.91452	28.2893	42.6297	41.1892	40.1353	45.0407	47.0591	45.6604	48.8167	54.7255	58.7546	74.7655	79.4074	68.7259	46.3316	0	0	0	4.20705	13.9229	14.4425	16.0977	16.7546	17.03	18.4256	18.8596	19.811	20.1642	22.4342	23.323	23.8451	25.25	27.1136	27.839	27.9464	28.045	26.6906	24.9442	23.5617	20.9249	19.4391	17.9017	15.6893	13.4121	12.8275	11.8165
595	11.2815	16.6833	11.1058	15.9479	27.4583	43.7536	41.4127	39.1935	44.209	45.7923	45.1635	46.8585	53.8695	57.6047	73.5857	80.2896	68.9489	46.1814	0	0	0	0	13.6177	13.7506	15.3765	16.5199	16.7924	17.9282	18.2367	19.1758	19.6818	21.4378	22.5903	22.7708	24.4861	26.3636	27.0712	27.2807	27.2827	25.813	24.1341	22.5959	20.3851	19.0311	17.398	15.1149	13.0788	12.3556	11.3433
596.02	7.50558	10.104	5.79447	16.8675	29.4925	43.0077	39.8003	37.3417	43.4982	44.5815	43.272	46.0761	52.3272	56.2814	73.6353	79.8855	69.1546	45.4685	0	0	0	0	12.9232	13.5387	14.657	16.1601	16.8195	17.2593	17.8829	18.3548	18.7826	20.8422	21.947	21.9944	23.5216	25.1733	26.1762	26.5623	26.6048	25.1158	23.6832	21.7695	19.913	18.5869	17.1977	14.8242	12.667	11.7921	11.0207
597.05	4.62847	9.38475	14.4165	16.3116	28.2678	42.8176	40.3503	35.9797	42.0006	43.6174	41.9662	45.1047	51.2858	55.2639	73.3556	79.2774	68.7852	45.2261	0	0	0	0	12.2825	13.4531	14.0954	15.814	16.4811	16.6448	17.4732	17.7587	18.3856	20.3463	21.3293	21.3862	22.8219	24.7572	25.349	25.8228	25.6638	24.8021	23.1549	21.2119	19.3785	18.1335	16.9165	14.5477	12.3839	11.3469	10.7661
597.94	13.1594	9.44397	22.8543	16.1767	27.7213	41.3352	40.6252	35.2368	40.8174	42.6557	40.5751	44.131	49.9183	54.3005	72.957	78.6121	67.8783	44.9546	0	0	0	0	11.8355	12.7982	13.9716	15.0645	16.1025	16.2387	17.022	17.137	18.241	19.8802	20.7827	21.1065	22.1383	24.6353	24.5597	24.8595	24.7566	24.1273	22.3881	20.8375	18.9027	17.4513	16.3389	14.1396	11.9063	11.19	10.5268
598.97	17.3713	11.2772	14.2483	12.7335	29.1223	41.3944	40.5888	36.021	40.1163	41.5429	40.0285	43.1648	49.1486	53.471	71.694	77.9771	67.7542	44.8838	9.34737	0	0	0	11.4841	12.2772	13.6565	14.7547	15.3559	15.8194	16.5224	16.7552	17.9649	19.1095	20.1225	20.7589	21.7228	24.0226	23.9158	24.0684	24.2407	23.4942	21.7963	20.3278	18.5169	17.0318	15.6857	13.6246	11.613	10.9108	10.3034
600	1.2851	7.52265	4.86696	8.54938	31.1743	40.5321	39.0557	34.7161	38.8067	40.0238	39.0029	42.6144	47.8046	52.3641	71.5128	77.2754	67.3682	44.7813	17.0087	0	0	0	11.1596	12.2622	13.0329	13.9017	14.7683	15.3459	16.1318	16.4615	17.3334	18.6026	19.5517	20.0197	21.3128	22.6176	23.1507	23.2965	23.6337	22.8416	21.1197	19.8457	17.8772	16.4014	15.2046	13.115	11.3888	10.7406	10.124
601.02	0	7.17592	8.01804	9.661	30.5095	40.5213	39.7896	34.3662	37.8092	39.4386	37.9115	41.1314	45.6898	51.6513	70.2335	76.6917	66.8299	44.1873	21.0033	0	0	0	10.2023	11.9763	12.8897	13.8077	14.22	14.792	15.6845	16.0128	16.6564	18.0225	18.9527	19.228	20.6987	21.8365	22.5556	22.7604	22.7131	21.9789	20.5616	19.2854	17.4091	15.9041	14.8649	12.705	11.1553	10.4182	9.92313
602.05	2.5217	4.22903	19.2974	6.44924	26.8218	41.9886	39.0537	33.8762	37.1421	38.3586	36.0205	40.0415	44.1435	51.0349	69.1215	75.5164	66.231	43.6335	22.7023	0	0	0	8.66647	11.4309	12.4292	13.5057	13.7597	14.4528	15.4597	15.9266	16.3416	17.5235	18.4275	18.8197	19.7037	21.1112	22.0358	22.0446	22.0933	21.3764	19.9821	18.8318	16.7297	15.507	14.3942	12.3052	10.7141	10.0633	9.62472
602.94	10.0686	1.12591	24.9714	2.72739	24.7206	42.6514	37.9339	33.16	36.4134	36.8908	34.8644	38.8076	43.1738	49.7912	68.147	74.7098	66.2143	43.624	22.8592	0	0	0	6.48664	11.1855	11.9589	13.5904	13.7967	14.1877	14.996	15.5436	16.0977	17.0653	17.9545	18.357	19.2095	20.6729	21.6043	21.4423	21.7573	20.7265	19.5628	18.3216	16.2191	15.3239	13.9599	12.1418	10.334	9.753	9.20765
603.97	5.94514	7.92655	18.6411	9.79228	22.5537	41.203	36.9835	31.1874	34.5795	35.2629	33.7298	37.448	42.6967	48.6177	67.9718	74.7003	65.1217	43.6488	22.6584	0	0	0	3.17046	11.0967	11.4962	13.3125	13.4034	14.351	14.3305	15.2551	15.632	16.5989	17.666	17.6467	19.014	20.1397	20.7905	20.8398	21.2454	20.155	18.9566	17.6098	15.6636	14.7562	13.5632	11.9654	10.1092	9.73799	8.89652
605	0	14.3583	11.9923	13.5476	26.9168	40.3451	37.1702	30.0934	33.5596	34.0474	32.6924	35.9624	41.3553	47.6322	66.8151	74.5903	64.8103	43.0672	22.5842	0	0	0	0	10.4469	11.6071	12.5648	13.1036	14.0867	13.9639	14.6586	14.9612	15.9084	17.3192	16.9432	18.4728	19.8886	20.094	20.4778	20.14	19.5117	18.379	17.1731	15.4105	14.1728	13.355	11.62	9.87836	9.52231	8.64765
606.02	0	14.8172	17.5971	14.561	27.9246	39.9629	35.6818	30.8135	32.6659	33.1145	31.6172	35.4312	39.758	46.7469	65.8808	74.2636	63.7185	41.9579	22.641	0	0	0	0	9.72956	11.3218	12.0797	12.6658	13.4325	13.4878	14.3804	14.4529	15.5296	16.9454	16.4506	17.6545	19.2005	19.4944	19.9883	19.5338	19.2361	17.845	16.862	14.8355	13.7469	13.0603	11.2828	9.59587	9.02468	8.61644
607.05	0	9.8627	18.1892	14.9007	27.762	39.2029	34.9758	30.9605	32.103	32.0276	31.0654	34.5297	38.6939	46.0297	64.9207	72.8739	63.0789	41.8333	22.524	0	0	0	0	9.48318	10.8701	11.78	12.4676	12.6559	13.0742	13.7374	13.9984	15.1565	16.3696	16.1428	17.4369	18.4029	19.1972	19.3915	19.1606	18.717	17.3817	16.6004	14.5646	13.54	12.7151	10.9429	9.4536	8.7345	8.42489
607.94	0.366657	12.5035	12.1853	15.2066	27.6102	37.3052	34.4422	29.4937	30.6407	30.833	29.9453	33.1141	38.1594	44.953	64.2511	72.2851	61.8619	41.6636	22.2091	0	0	0	0	9.30449	10.4521	11.6305	11.999	12.5286	12.7841	13.4097	13.6206	14.8947	15.7521	15.9553	17.115	17.8166	18.5231	18.4608	18.8578	18.2955	16.8676	15.9427	14.2037	13.1967	12.3143	10.6598	9.23952	8.69578	8.18703
608.97	11.131	17.0816	5.52271	9.96579	26.5445	34.8472	34.5434	27.9284	29.816	29.8176	28.698	31.6857	36.5454	43.5009	62.7969	71.0605	62.2384	41.2794	21.6273	0.659131	0	0	0	8.90195	10.0275	11.0509	11.5372	12.4434	12.7544	13.1287	13.2322	14.3499	15.2772	15.7183	16.6331	17.3922	18.0092	17.9541	18.3562	17.7344	16.3314	15.2526	14.0667	12.6701	11.9901	10.2554	8.99996	8.44495	7.84668
610	18.2022	13.773	8.8775	6.82243	24.0516	34.7204	33.7692	27.0546	28.6529	29.1951	28.1548	30.9753	34.8728	42.378	62.4775	70.0691	61.4561	40.437	21.2229	6.20879	0	0	0	8.39404	9.50498	10.8961	11.2142	12.3724	12.2684	12.7912	13.1582	14.0278	14.9634	15.1535	15.6595	17.053	17.3785	17.5415	18.0463	17.0813	16.0396	14.7847	13.4989	12.2991	11.6762	10.0124	8.68038	8.23023	7.6969
611.02	3.0133	8.3433	11.9358	9.90596	24.4758	35.1749	32.6984	27.531	28.1618	28.5353	27.8914	30.0541	34.0163	41.1633	61.2963	68.6213	59.7704	39.5571	20.7814	8.93932	0	0	0	7.89969	9.176	10.3381	10.6674	11.7545	11.3894	12.0512	12.9481	13.448	14.4093	14.4978	15.1217	16.4253	16.9412	17.245	17.5334	16.529	15.5622	14.6585	13.1771	12.0483	11.3394	9.76868	8.55765	7.98086	7.54395
612.05	0	5.95229	11.9296	14.4979	23.7525	34.9175	31.671	26.5665	27.3555	27.5362	27.1844	28.8919	33.9103	39.9859	59.899	68.1088	58.1653	38.9144	20.5154	9.96002	0	0	0	7.11181	9.1265	9.92455	10.5598	10.9421	10.9171	11.8335	12.5699	13.4763	14.0789	13.9105	14.8603	15.8131	16.6106	16.7608	16.9407	16.2441	14.8456	14.2419	12.6324	11.7618	11.0174	9.54894	8.20386	7.90099	7.39342
612.94	1.72442	2.15983	17.0771	20.3445	24.8565	32.5712	31.1741	25.7246	27.1742	26.9724	26.2509	27.401	32.783	39.057	57.7981	66.9931	57.6194	38.2729	19.7492	10.6734	0	0	0	5.71942	9.38451	9.8912	10.4299	10.8031	11.0759	11.7526	11.9171	13.2812	13.5909	13.5142	14.6293	15.4605	16.332	16.2986	16.5058	15.7942	14.3135	13.6735	12.4181	11.4194	10.651	9.19043	7.96425	7.55485	7.08082
613.97	8.24608	0	15.361	16.6124	21.4427	32.8853	30.959	24.3562	26.3709	26.0502	25.1995	27.1617	31.8689	38.9071	57.5865	65.4736	56.9228	37.6826	19.1904	11.0289	0	0	0	3.35403	9.07429	9.55363	10.2118	10.9635	11.0372	11.6707	11.5845	12.7947	13.0759	13.1713	14.1465	15.3485	15.9629	15.7532	15.6318	15.0135	13.9937	13.1723	11.9653	11.1134	10.3721	8.94414	7.68031	7.43925	6.80302
615	5.24347	7.82016	8.60365	14.6272	24.613	33.4424	30.675	24.7054	24.93	24.8663	24.1998	26.9826	30.609	38.1886	56.5748	64.5957	55.7842	36.5232	18.9102	10.9823	0	0	0	0	8.55927	9.43651	9.84379	10.4419	10.739	11.0203	11.1679	12.0481	12.5201	12.8836	13.5797	14.9793	15.2903	15.5469	15.0069	14.554	13.7877	12.9255	11.6733	10.7508	9.94403	8.71302	7.61495	7.25524	6.6614
616.02	0	7.59206	0.633645	9.28874	23.1736	34.3163	29.8059	23.7453	23.7401	23.6265	23.4693	26.5464	29.6875	37.0412	55.5817	63.3565	54.7749	35.9141	18.9255	10.4582	0	0	0	0	7.96728	9.04042	9.56836	9.70728	10.2378	10.5186	10.8267	11.8521	12.4319	12.4271	13.1725	14.2783	14.544	15.1967	14.5459	14.2005	13.2675	12.7496	11.197	10.2744	9.65537	8.45994	7.41284	7.05572	6.53406
617.05	0	0.372408	6.27821	8.89761	23.1519	33.7596	29.2611	23.5672	23.4807	23.2016	22.4446	25.3441	29.2658	35.4496	53.9237	61.8613	53.8311	35.4387	18.214	10.0502	0	0	0	0	7.54417	8.70967	9.31669	9.60634	9.94027	10.3661	10.4538	11.5592	12.104	12.223	12.5337	13.6446	14.0732	14.6855	14.2252	13.9469	13.0244	12.2557	10.8534	10.1187	9.41783	8.25741	7.23212	6.7016	6.37992
617.94	8.49791	0	7.38043	0	22.2626	31.3929	28.5387	22.9454	23.0772	23.3302	22.0264	24.437	28.5558	34.348	53.1551	60.5295	52.597	34.7046	17.4996	10.1469	0	0	0	0	7.17084	8.30474	9.1581	9.49415	9.66728	10.3355	10.3555	11.2586	11.6059	12.0128	12.2885	13.0946	13.8701	13.8109	13.8582	13.6806	12.4495	11.7546	10.4761	9.88737	9.22665	8.07334	6.96826	6.3966	6.21498
618.97	6.33398	6.31416	0	2.10142	22.3787	27.9139	27.7279	22.7503	22.5024	23.0393	21.7661	23.5751	27.5081	34.0255	52.0264	59.2957	51.0524	33.5804	17.3642	10.2027	0	0	0	0	6.90006	8.43289	8.85788	9.03564	9.50128	9.81143	10.3314	10.6914	10.9996	11.7348	11.8637	12.8028	13.5313	13.2366	13.6551	13.2307	12.2806	11.331	10.2363	9.66414	9.00566	7.84787	6.80283	6.32136	6.01328
620	3.42561	7.79133	0	5.97964	21.0593	26.3794	26.3957	21.7623	21.7397	21.991	21.0473	22.6052	26.743	33.5866	50.5857	57.9039	49.7643	32.6414	17.0201	9.89482	1.13094	0	0	0	6.48142	7.85388	8.25117	8.73357	8.93063	9.07267	10.0412	10.3146	10.7252	11.455	11.4248	12.5975	13.0088	12.9625	13.2734	12.6002	11.8467	11.1293	10.0252	9.38705	8.77966	7.56006	6.65466	6.16086	5.82589
621.02	3.35419	6.05952	0	13.7397	19.4658	26.8629	26.0392	20.9458	20.8834	20.9004	19.6199	22.0685	26.5519	32.7132	49.2763	56.6719	48.8492	32.1841	16.6274	9.49572	3.49731	0	0	0	5.75718	7.27854	8.14665	8.82469	8.48326	8.78601	9.5885	9.98069	10.7029	11.2434	11.2142	12.1321	12.7159	12.8121	12.5345	11.995	11.4523	10.7143	9.73418	9.21916	8.52419	7.40693	6.45597	6.11151	5.71428
622.05	3.55892	0	6.04214	13.1391	17.8061	26.7353	26.1562	20.3537	20.3687	20.2336	18.9157	21.3558	25.7791	31.5136	47.962	56.0659	48.1099	31.1513	16.1393	9.43882	4.71256	0	0	0	4.81614	6.87777	8.05756	8.63028	8.0033	8.77709	9.20624	9.91385	10.4138	10.8454	11.2278	11.7146	12.2157	12.3156	12.247	11.7735	11.0881	10.3178	9.34258	8.73592	8.19368	7.20358	6.19454	5.86276	5.54864
622.94	0	0	9.962	12.0679	14.6981	26.172	25.9583	20.3607	20.0016	19.8019	18.6921	21.2606	24.5896	30.827	47.1781	55.0261	46.6118	30.1998	15.9191	9.56166	5.38254	0	0	0	3.15164	7.00024	7.80705	8.23868	7.79881	8.5899	9.13337	9.81452	10.0228	10.2829	10.8777	11.3427	11.8286	11.7618	11.9938	11.5861	10.7346	9.95172	9.13523	8.427	7.85387	6.87726	5.98413	5.70706	5.32001
623.97	0	0.618494	11.9152	8.58956	16.3523	27.1967	24.9799	19.3063	19.5612	19.0058	17.991	20.575	23.3898	29.9094	46.0571	53.2778	45.2589	29.3655	14.9927	9.4413	5.98809	0	0	0	0	6.64287	7.11519	7.57232	7.51677	8.19793	8.58424	9.26511	9.51592	9.837	10.307	11.0446	11.4785	11.5581	11.7828	11.2604	10.4153	9.64313	8.9186	8.2748	7.57883	6.67356	5.8319	5.4881	5.10008
625	8.40999	10.9386	12.4849	10.3511	17.0821	26.5	23.4701	17.6541	18.5658	18.3763	17.4731	19.8112	22.964	28.4194	44.6545	51.6382	44.1473	28.4568	14.7428	8.8464	6.17503	0	0	0	0	6.70652	6.94175	7.33535	7.4771	7.55333	8.25993	8.70911	9.42091	9.43805	9.91731	10.7918	11.1686	11.224	11.4675	10.6962	10.1281	9.35129	8.6981	8.10544	7.33006	6.50772	5.65029	5.35831	4.93223
626.02	8.62573	7.92585	13.6648	12.3777	16.0435	24.0252	23.4502	17.2409	17.8803	18.2639	16.8005	18.6359	22.265	27.4926	43.2681	50.3897	43.3984	27.6144	14.3172	8.20197	5.91683	0	0	0	0	6.26123	6.75427	7.17925	7.19665	7.50445	7.99013	8.51734	9.16288	9.12375	9.57148	10.6756	10.6031	10.6118	11.0228	10.3006	9.87213	9.10744	8.47494	7.72021	7.17659	6.33642	5.42801	5.14609	4.87343
627.05	1.58746	11.753	6.72458	7.48595	15.8183	24.2534	22.8269	17.4457	17.0851	17.8473	16.3524	18.0678	21.6139	26.7178	42.2282	49.6553	42.7168	26.644	14.3666	8.0215	5.66513	0	0	0	0	5.94759	6.6618	6.98405	6.91957	7.76476	7.90541	8.37473	9.0849	8.97286	9.4884	10.2239	10.3474	10.1746	10.732	10.2253	9.49455	8.89529	8.27479	7.49998	7.02378	6.11324	5.32663	4.98786	4.80087
627.94	0	5.5564	2.36827	3.48561	18.2508	25.2982	22.3847	17.7666	16.7602	16.953	15.73	17.8014	20.6631	26.2525	41.4783	48.4122	42.0754	26.3683	13.7621	7.94816	5.84541	0	0	0	0	5.58985	6.56128	6.88976	6.80173	7.68783	7.49101	8.01501	8.63747	8.65445	9.35469	9.77832	10.1159	10.1535	10.3156	10.0782	9.16713	8.55717	7.90754	7.25515	6.91953	5.97828	5.22604	4.87584	4.72363
628.97	0	4.89678	0.776553	5.4338	17.3089	23.6578	21.9949	16.9433	16.4627	15.7763	15.5304	17.6071	20.0043	25.0074	40.0163	47.404	40.7504	25.659	13.3584	7.66506	6.00752	0	0	0	0	5.72402	6.63741	6.61777	6.91878	7.15455	7.26386	7.77887	8.23152	8.3864	8.87337	9.41719	9.74882	9.96757	9.95248	9.67522	9.0649	8.16729	7.55668	7.12685	6.68251	5.74802	5.08125	4.68515	4.48589
630	0	0.897035	5.67632	7.64332	15.5643	20.7449	21.569	15.9465	16.0559	15.6733	15.1978	17.0549	19.1284	24.7483	38.8381	46.4917	38.8835	25.2048	12.9419	7.59851	5.79593	0	0	0	0	5.60291	6.3196	6.13934	6.68861	6.91558	6.92366	7.79403	7.96108	8.11593	8.42788	9.06481	9.46483	9.65142	9.55914	9.1855	8.66095	8.03268	7.42717	6.95247	6.41959	5.48412	4.93003	4.54485	4.2951
631.01	0	6.27666	9.95113	9.48427	14.1264	21.3504	20.4732	15.1173	15.5717	15.0488	14.773	16.2821	18.4242	23.9508	37.8018	45.3306	37.3082	24.3318	12.6602	7.56357	5.43205	1.62853	0	0	0	5.11036	5.8575	5.95019	6.38667	6.8559	6.68999	7.59426	7.72235	8.05785	8.07934	8.7378	9.1206	9.1486	9.44918	8.83109	8.33083	7.93799	7.16723	6.72132	6.1721	5.28175	4.81844	4.4963	4.11015
632.02	4.06882	4.91483	4.16543	14.4369	14.9977	20.8228	19.2425	15.2422	14.8375	14.3271	14.3025	15.5689	17.6399	23.8055	36.8684	43.5866	36.7111	23.9311	12.4698	7.43598	5.25543	2.69281	0	0	0	4.3344	5.29091	6.3852	6.03768	6.55227	6.48055	7.17083	7.36062	7.75637	8.12438	8.68912	8.95048	8.79963	9.13435	8.46246	7.99262	7.60921	6.95084	6.42405	6.06608	5.22466	4.63614	4.47552	4.09159
633.04	5.62079	5.30004	0	11.9598	17.8469	20.6708	19.2709	14.4807	13.8064	13.6679	13.6813	14.7441	17.1521	23.0643	35.7938	42.1261	36.143	23.1274	12.1028	7.01869	5.28743	3.52672	0	0	0	3.56939	5.22988	6.35276	5.83671	6.32241	6.47164	7.04404	7.0417	7.47447	7.90844	8.52535	8.45761	8.38885	8.69245	8.29695	7.83569	7.33847	6.68538	6.23113	5.90317	5.18385	4.43653	4.26346	3.98233
634.05	2.93054	4.09077	0	10.3281	15.5668	19.7367	18.5863	13.3236	13.2541	13.7932	13.1669	14.3438	16.5908	22.1779	35.0165	40.8521	35.0464	22.5058	11.7167	6.81738	5.49156	3.81746	0	0	0	1.54279	5.27301	5.76075	5.45602	6.1172	6.25235	6.83297	6.78485	7.1618	7.73396	8.11929	8.1973	8.2612	8.28076	8.07416	7.68024	7.19353	6.5292	6.06908	5.6802	5.0261	4.37804	4.07258	3.85801
635.07	1.70373	2.00149	0.533159	6.85372	10.4537	19.7353	18.0652	13.4741	13.6665	13.2552	12.5496	13.8625	16.4085	20.8298	34.0776	39.8276	34.111	21.8278	11.1269	6.82436	5.38456	4.03226	0	0	0	0	5.11685	5.45109	5.37747	5.9294	6.24688	6.60235	6.67617	6.85967	7.212	7.65702	7.96478	8.10904	8.0546	7.81988	7.47801	6.97577	6.18811	5.88992	5.55007	4.75224	4.25002	3.93837	3.75692
635.94	0	2.7598	8.50467	3.84135	9.85537	19.469	16.7906	13.4136	14.2242	12.9115	12.0155	13.5575	16.1244	20.5762	32.9442	39.0797	33.3524	21.2842	10.849	6.78109	5.03222	3.98473	0	0	0	0	4.7241	5.21228	5.40719	5.73894	6.12566	6.06517	6.47334	6.49947	7.28401	7.40162	7.85648	8.02519	7.89552	7.39939	7.00792	6.58606	5.99095	5.77887	5.33583	4.56778	4.07068	3.83993	3.68992
636.95	0.355115	1.37627	12.0152	0	14.7106	19.6104	16.5021	12.8667	13.3358	12.4379	11.3869	13.1416	15.8861	20.0756	31.7381	38.3651	32.5681	21.034	10.4001	6.56727	4.79429	3.98999	0	0	0	0	4.90487	5.1551	5.32518	5.66401	5.86814	5.76925	6.49318	6.30644	7.04609	7.18376	7.54231	7.57489	7.93431	7.28708	6.67338	6.39695	5.84322	5.5639	5.15027	4.53451	3.90791	3.75362	3.50915
637.97	0	0	8.54022	0	15.4453	18.5867	16.4094	11.5832	11.9951	12.1534	11.2219	12.5592	15.179	19.5348	30.7236	37.1235	31.7328	20.3118	9.9315	6.11021	4.94403	3.59132	0	0	0	0	4.88923	5.08767	5.16837	5.54421	5.59691	5.63621	6.26329	6.1828	6.86386	7.11382	7.38938	7.23404	7.7275	6.99053	6.59509	6.30034	5.74538	5.37697	4.94294	4.46323	3.79506	3.61639	3.44794
638.98	0	0	3.90198	0	16.9237	18.1084	16.1417	11.4095	11.2243	11.4744	10.7694	11.8067	14.3537	18.6373	29.9336	35.7842	30.9702	19.8433	9.659	5.88243	4.84642	3.55532	0	0	0	0	4.21842	4.97768	5.04676	5.45938	5.42299	5.7608	5.97589	6.01427	6.40777	6.97145	7.11435	7.00294	7.463	6.77401	6.45737	6.16057	5.59297	5.12072	4.8547	4.29362	3.64081	3.46722	3.32544
640	0	0	14.1242	2.8181	14.8779	16.7852	15.1362	10.9308	11.1812	11.4063	10.6876	11.6629	13.766	18.5189	29.4884	34.8472	30.2564	18.9961	9.41226	5.7802	4.82134	3.63943	0	0	0	0	3.81023	4.68156	4.85693	5.05988	5.25401	5.70941	5.62035	5.74036	6.35294	6.85792	6.6986	6.89615	6.92931	6.52877	6.09395	5.94626	5.35879	4.95508	4.67844	4.0937	3.58919	3.37907	3.20173
641.01	6.5677	2.74862	7.86602	7.57861	10.2988	15.9187	13.8552	11.0464	10.8396	11.082	10.1052	11.5695	13.2664	17.7831	28.5111	33.4604	29.1388	18.7192	8.95077	5.69926	4.79556	3.79733	1.38299	0	0	0	3.63326	4.54579	4.67789	4.7428	4.955	5.49326	5.70417	5.68392	6.07942	6.53789	6.28665	6.7116	6.78211	6.62382	5.78095	5.7504	5.20895	4.88609	4.47494	3.97847	3.48114	3.36493	3.05178
642.02	10.5929	3.28332	4.73972	8.07994	6.91628	14.5606	13.1101	10.854	10.5845	10.4733	9.78189	10.7279	13.0906	17.0734	27.2993	32.1975	28.1929	18.0742	8.89026	5.49637	4.76045	3.70206	2.17128	0	0	0	3.17352	4.43927	4.53566	4.3586	4.79755	5.2479	5.55624	5.49855	5.87773	6.30908	6.00188	6.37806	6.68634	6.49608	5.72499	5.51122	4.98078	4.77606	4.38883	3.84145	3.37435	3.24471	2.9958
643.04	10.2247	1.21397	0	6.09518	7.6065	14.6415	12.8331	10.943	10.0364	9.92909	9.72996	10.5039	12.4511	16.3408	25.8621	30.8599	27.5237	17.4796	8.8062	5.44064	4.32875	3.69855	2.52657	0	0	0	2.13332	4.39147	4.60842	4.46676	4.59741	5.15866	5.16375	5.32453	5.57907	6.10935	5.82057	6.23431	6.47166	6.12681	5.63228	5.24595	4.83485	4.50315	4.25273	3.73209	3.21193	3.07941	2.89274
644.05	0.728684	2.18972	0	4.75137	6.78484	11.8252	12.5264	10.3366	9.76102	9.72245	9.68053	10.2217	11.9437	15.8787	25.3154	30.0713	26.5822	16.6933	8.25226	5.38996	4.33607	3.50282	2.751	0	0	0	0.498496	4.14889	4.48546	4.28628	4.45795	4.98842	4.8665	5.16964	5.29025	5.88479	5.86639	5.90774	6.06395	5.73122	5.5376	5.08244	4.62088	4.20026	4.09248	3.60726	3.13244	2.94068	2.86389
645.07	3.04255	3.16496	0.072384	0	5.77234	11.9315	11.9974	10.0969	8.99532	9.82121	8.87224	9.74948	11.6262	15.1794	24.4407	28.9591	26.1336	16.3707	7.73775	5.33671	4.18204	3.25921	2.79323	0	0	0	0	3.80203	4.25274	4.23171	4.33154	4.76984	4.95803	5.13581	5.22639	5.70331	5.78987	5.6808	5.81114	5.53411	5.35626	5.00575	4.50871	4.1576	3.9231	3.53007	3.01575	2.84146	2.78511
645.94	4.19964	0	6.5303	0	8.40327	11.8915	11.1768	8.88077	8.81376	9.23544	8.06146	9.17869	11.1795	14.42	23.7789	27.9547	24.857	16.2384	7.86751	4.98754	4.09925	3.21243	2.9111	0	0	0	0	3.34811	3.95273	4.03355	4.18291	4.69431	4.91487	5.00563	5.06283	5.54374	5.56803	5.30422	5.79517	5.48596	5.23467	5.00187	4.42335	4.12162	3.8735	3.42419	2.94069	2.77908	2.58171
646.95	3.94711	1.12112	5.46319	0	8.27145	12.7032	10.423	8.35424	8.61669	8.9316	7.85326	9.38342	10.6711	13.9432	22.49	27.1489	24.0247	15.757	8.11536	4.74194	3.98081	3.25993	2.71747	0	0	0	0	3.22429	3.72642	4.22892	4.0078	4.63273	4.79535	4.83387	4.98252	5.22527	5.22687	5.28877	5.58128	5.36571	4.94512	4.87028	4.48473	4.12493	3.79089	3.31852	2.90499	2.75054	2.44323
647.97	3.56934	7.78985	6.88874	2.19353	9.15819	10.5584	9.67936	8.71394	8.66257	8.60762	7.4584	8.91499	10.4153	13.5427	22.1137	26.7489	22.7938	15.1801	7.89586	4.49169	4.12881	3.35414	2.43633	0	0	0	0	3.22763	3.556	4.03422	3.90761	4.38553	4.56756	4.56037	4.75963	4.85533	5.09477	5.15268	5.30273	5.18498	4.75486	4.67052	4.41191	3.94387	3.70989	3.16705	2.82743	2.68856	2.4596
[truncated: 22 more columns]

## Sheet: 3 kDa
Wave	200	205	210	215	220	225	230	235	240	245	250	255	260	265	270	275	280	285	290	295	300	305	310	315	320	325	330	335	340	345	350	355	360	365	370	375	380	385	390	395	400	405	410	415	420	425	430	435	440
252.03	0	0	0	0	0	0	0	0	0	0	0	0	0	0	0	0	0	0	0	0	0	0	0.10646	0	0	0.0634107	0	0.101789	0	0	0	0	0.0704073	0	0.182287	0.15142	0.195601	0.111216	0.0813211	0.00708278	0	0	0	0	0.0531819	0.00580361	0	0.0315818	0
252.96	0	0	0	0	0	0	0	0	0	0	0	0	0	0	0	0	0	0	0	0	0	0	0.0134765	0	0	0.182443	0	0	0	0.0620725	0	0.0798585	0.0549253	0	0.188533	0.0854829	0.0894978	0.106535	0	0	0	0	0	0	0.0280684	0	0	0	0
254.06	0	0	0	0	0.803689	0	0	0	0	0	0	0	0	0	0	0	0	0	0	0	0	0	0	0.00480201	0	0.177279	0	0	0	0.0127341	0	0.0743468	0.0925321	0.0367469	0.140326	0.0987377	0.110764	0.0226113	0.0347463	0	0	0	0	0	0	0	0	0	0
255	0	0	0	0	0	0	0	0	0	0	0	0	0	0	0	0	0	0	0	0	0	0	0	0	0	0.0319542	0.100707	0	0.142699	0.03077	0.0373111	0.0603553	0.149378	0.132478	0.0656339	0.0426666	0.129954	0.101772	0.145828	0.0052555	0.0335249	0	0	0	0	0	0	0	0.0116122
255.93	0	0	0	0	0	0	0	0	0	0	0	0	0	0	0	0	0	0	0	0	0	0	0.0197999	0.0578314	0	0	0.0266097	0.0842317	0.0731772	0	0.185432	0	0.0643258	0.0479366	0.0716793	0.0937164	0.0363026	0.162169	0.148795	0.0440377	0.0621465	0	0	0	0	0.00600163	0.0230938	0	0
257.03	0	0	0	0	0	0	0	0	0	0	0	0	0	0	0	0	0	0	0	0	0	0	0	0.0145808	0	0	0	0.216677	0	0	0.309305	0.0916436	0	0	0.0632358	0.216794	0	0.120953	0.0779297	0.01934	0.0519345	0.0227436	0	0	0	0	0.0118484	0	0
257.96	0	0	0	0	0	0	0	0	0	0	0	0	0	0	0	0	0	0	0	0	0	0	0	0	0	0	0	0.0852507	0	0	0.130108	0.0994129	0	0	0.0676862	0.233867	0.0211998	0.0410451	0.0714858	0.015158	0	0	0	0	0	0	0	0	0
259.06	0	0	0	0	0	0	0	0	0	0	0	0	0	0	0	0	0	0	0	0	0	0	0	0	0.0422716	0	0	0	0	0	0	0.144737	0.0213099	0	0.0164286	0.104076	0.206665	0.00242372	0.0324893	0	0	0	0	0	0	0	0	0	0
260	0	0	0	0	0	0	0	0	0	0	0	0	0	0	0	0	0	0	0	0	0	0	0	0	0	0	0	0	0.109905	0.0210047	0	0.0108627	0.0342911	0	0.0859212	0.0523344	0.217821	0.065063	0.0914191	0	0	0	0	0	0.00886644	0	0.0104018	0	0.00299288
260.93	0	0	0	0	0	0	0	0	0	0	0	0	0	0	0	0	0	0	0	0	0	0	0	0	0	0	0	0	0.0694659	0.0969621	0	0	0	0	0.154334	0.122367	0.185163	0.056688	0.106842	0	0.0130859	0	0	0	0.0127393	0	0	0	0
262.03	0	0	0	0	0	0	0	0	0	0	0	0	0	0	0	0	0	0	0	0	0	0	0	0	0	0	0	0	0	0	0	0	0	0	0.163854	0.0706171	0.230657	0.0387575	0.0978009	0	0.140848	0	0	0	0	0	0	0.0113976	0
262.96	0	0	0	0	0	0	0	0	0	0	0	0	0	0	0	0	0	0	0	0	0	0.0177711	0	0	0	0	0	0	0	0	0	0.00622262	0	0.0746551	0.0998879	0	0.161177	0	0.0261353	0.00675908	0.12424	0.011917	0	0.00216519	0	0	0	0.00165158	0
264.06	0	0	0	0	0	0	0.0590046	0	0	0	0	0	0	0	0	0	0	0	0	0	0	0	0	0.0053326	0	0	0	0	0	0	0.0489748	0	0.0292612	0.00708802	0.0576704	0	0.0650432	0	0.0606684	0.104566	0.00928535	0.0238685	0	0	0	0	0	0	0.0152875
265	0	0	0	0	0	0	0.467944	0	0	0	1.76018	0	0	0	0	0	0	0	0	0	0.0108162	0	0	0	0	0	0	0	0	0	0.0251127	0.013908	0.0502258	0	0.0870685	0.235763	0.105819	0.0656405	0	0.160179	0	0	0	0	0.00400733	0	0	0	0
265.93	0	0	0	0	0.0787391	1.33569	2.72131	2.71868	0.876685	1.62601	4.03063	0	0	0	0	0	0	0	0	0	0	0	0	0	0	0	0	0	0	0	0.0228124	0.0251313	0.00070931	0	0.118748	0.230586	0.133793	0.10546	0.012483	0.114279	0	0	0	0	0	0	0	0	0.0390235
267.03	0	0	0	0	2.44541	4.34529	5.07046	6.41418	4.86798	6.20098	8.06959	5.31563	0	0	0	0	0	0	0	0	0	0	0	0	0	0	0	0	0	0	0.0492658	0	0.0530052	0	0.172869	0.133735	0.00517526	0.141759	0.0728842	0.0356116	0	0	0	0	0	0	0	0	0.0239018
267.96	0	0	0	0	4.91595	6.77226	8.24728	11.2627	13.3095	13.6973	15.1859	15.9929	0	0	0	0	0	0	0	0	0	0	0	0	0.173569	0.0465039	0.0468226	0	0	0	0.0334152	0	0.0530259	0	0.114575	0	0	0.133799	0.0622436	0	0.0226317	0	0	0	0	0	0	0	0
269.06	0	0	0	0	7.61051	10.1105	11.8745	17.7313	24.0054	23.34	23.8061	26.9048	0	0	0	0	0	0	0	0	0	0	0.00407435	0.0642424	0	0	0	0	0	0	0.0752105	0	0	0	0.0990382	0	0	0.0956006	0	0	0.0348516	0	0	0	0	0	0	0	0
270	0	0	1.49511	0	10.979	13.6247	17.6454	26.2182	38.0473	36.3306	34.5218	40.2644	20.7877	0	0	0	0	0	0	0	0	0	0.0837241	0	0	0	0	0	0	0	0.165167	0	0	0	0.0342595	0.0528963	0	0.00831601	0	0.0466433	0	0	0	0	0	0	0	0	0
270.93	0	0	5.43994	4.71291	15.3349	20.5101	25.1529	37.8862	55.3573	53.0569	50.8598	56.2091	49.383	0	0	0	0	0	0	0	0	0	0	0	0	0	0.0446372	0	0	0	0.0465914	0	0	0	0.0648346	0.157222	0	0	0.0175302	0.0500492	0	0	0	0	0	0	0	0	0
272.03	0.946183	14.5592	4.54248	14.389	23.8315	29.437	33.0999	50.6626	74.7194	72.7897	70.435	75.2194	77.73	0	0	0	0	0	0	0	0	0	0	0	0.236442	0	0.144061	0	0	0	0	0	0	0.0497097	0.0695652	0.120406	0.00951015	0	0.0282807	0	0	0	0	0	0	0	0	0	0
272.96	2.55332	19.8678	19.4543	28.5137	29.5489	37.1935	41.4805	64.186	93.5029	93.6566	88.7582	94.5736	101.432	0	0	0	0	0	0	0	0	0	0	0	0.311979	0	0.328305	0.12776	0	0	0	0	0.00477749	0.114389	0.00182594	0.110587	0.125707	0	0.0905451	0	0	0.0245066	0	0	0	0	0	0	0
274.06	7.27024	20.7788	28.9855	30.8152	36.6168	42.1613	49.8599	74.5152	108.011	110.228	103.172	110.869	119.436	45.0668	0	0	0	0	0	0	0	0	0	0	0.0943327	0	0.34757	0.317171	0.130026	0	0	0	0	0.142994	0	0.064319	0.157624	0	0.127777	0	0	0	0	0	0	0	0	0	0
275	9.94783	21.0565	35.8485	34.265	38.948	47.7158	56.624	84.2186	121.073	125.162	118.888	124.499	134.349	86.8983	0	0	0	0	0	0	0	0	0	0	0.158859	0	0.324724	0.166343	0.146679	0	0.11955	0	0.0859491	0.100717	0	0	0.0928564	0.0314569	0.0846343	0.0313889	0	0	0	0	0	0	0	0	0
275.93	17.2848	22.8895	36.4251	32.8433	46.1159	53.1725	61.7459	92.194	133.569	139.778	133.677	137.45	147.99	112.159	0	0	0	0	0	0	0	0	0.0920613	0	0.129331	0	0.136787	0.106462	0.204437	0	0.18625	0	0.12513	0.135381	0.118185	0	0.0368429	0.110763	0	0.00553425	0.0246164	0	0	0	0	0	0	0	0
277.03	6.48024	21.8559	40.6901	42.5161	50.3403	57.6367	67.3199	100.922	147.009	154.238	145.391	151.513	161.764	133.281	0	0	0	0	0	0	0	0	0.0740041	0	0.25473	0.178715	0.38877	0.229064	0.0623005	0.106736	0	0.0547935	0.0619343	0.179101	0.155314	0	0.0124379	0.0685279	0.0298204	0	0.0544661	0	0	0	0	0	0	0	0
277.96	22.5964	33.8724	40.603	50.9531	58.1291	63.2984	74.6828	110.024	161.593	168.239	158.867	166.18	176.367	149.808	9.46797	0	0	0	0	0	0	0	0.166471	0.0468754	0.159177	0.0618173	0.431947	0.320982	0.151568	0.258158	0	0	0.0411167	0.194516	0.0362818	0.0614633	0	0.0391426	0.0984842	0	0	0	0	0	0	0	0.0347662	0	0
279.06	32.2661	31.5832	39.4955	58.7897	60.839	69.909	80.3113	120.63	173.993	181.547	173.287	180.158	191.738	160.586	58.9375	0	0	0	0	0	0	0	0.023098	0.186163	0.306552	0.328644	0.274626	0.426434	0.269842	0.164943	0.0593246	0.0357316	0.0131203	0.106179	0	0.130258	0	0.0645166	0.114345	0	0	0	0	0	0	0	0	0	0
280	41.6535	30.5035	45.0001	62.8033	67.8998	77.0483	87.3307	129.564	186.724	194.538	187.147	191.39	205.191	170.914	93.2719	0	0	0	0	0	0	0	0.0646527	0.22418	0.246322	0.47027	0.218841	0.447966	0.350774	0.116676	0.0925551	0.155259	0.0233425	0.0197142	0.0551823	0.109934	0.0471103	0.0844245	0.020314	0	0	0	0	0	0	0	0	0	0
280.93	38.5505	33.5178	47.719	74.8185	74.3325	79.8732	94.0281	135.295	196.117	203.393	194.907	200.547	213.858	181.599	113.799	0	0	0	0	0	0	0	0	0.121953	0.175987	0.475444	0.217214	0.482839	0.371766	0.119617	0	0.148972	0	0	0.211517	0.0593349	0.0898125	0.0720567	0	0	0	0	0	0	0	0	0	0	0
282.03	35.4962	43.2952	53.2686	80.4693	78.7818	84.7029	99.6238	138.562	202.95	211.267	201.734	209.281	221.037	192.914	132.109	0	0	0	0	0	0	0	0.0818329	0	0.183968	0.241606	0.217718	0.370395	0.347065	0.317953	0.157017	0	0.0832346	0.0680951	0.180756	0.0297968	0.131643	0.0854256	0.0352487	0.0465534	0	0	0	0	0	0	0	0	0
282.96	31.4707	35.6858	56.3372	72.507	77.1824	89.7219	103.029	142.455	203.742	214.962	204.372	212.705	224.084	199.006	144.064	0	0	0	0	0	0	0	0.0600896	0.0441886	0.229112	0.450128	0.304552	0.214849	0.233351	0.344699	0.300531	0	0.0991674	0.161353	0.177317	0.0624606	0.0433885	0.0347906	0.03799	0.0579607	0.0234908	0	0	0	0	0	0	0	0.0299555
284.06	29.4136	36.1485	59.4332	65.6613	78.273	96.0206	107.508	145.473	204.42	217.265	206.218	210.896	222.985	202.584	152.482	34.226	0	0	0	0	0	0	0	0.0379214	0.205017	0.292185	0.562913	0.221081	0.0494296	0.287044	0.340822	0.010387	0	0.182109	0.0698649	0.122304	0	0.015665	0.0324698	0.00897668	0	0	0	0	0	0	0	0	0
285	32.1631	47.3034	58.1119	63.1436	82.0674	101.629	110.85	147.324	205.902	218.639	207.069	210.954	224.499	203.957	160.473	70.8501	0	0	0	0	0	0	0	0	0.0931932	0.183424	0.687389	0.242176	0.183263	0.152988	0.238276	0.058965	0	0.0955995	0	0.113772	0	0	0.0751576	0	0	0	0	0	0	0	0	0	0
285.93	34.468	54.5799	52.0752	70.6138	86.8183	108.4	114.704	148.016	208.496	220.433	208.805	216.078	229.286	206.054	170.348	97.2409	0	0	0	0	0	0	0	0	0.084194	0.230623	0.494831	0.338336	0.197598	0.121428	0.247092	0.293332	0	0.0763534	0	0.104413	0.168124	0.0178629	0.105599	0	0	0	0	0	0	0	0.0353384	0	0
287.03	45.4437	47.2974	50.0467	71.9764	91.4823	114.817	120.702	150.08	212.432	220.657	209.98	220.9	233.385	211.07	181.617	121.252	0	0	0	0	0	0	0	0	0.060823	0.370353	0.517165	0.293932	0.249388	0.250972	0.341971	0.367913	0.229019	0	0.0950383	0.117748	0.124385	0	0.0645113	0.0320896	0	0	0	0	0	0	0.040332	0	0
287.96	49.5	48.9581	46.886	72.7132	97.6218	120.533	127.698	153.707	214.612	222.367	212.035	222.755	235.307	218.384	194.771	142.846	0	0	0	0	0	0	0	0	0.129575	0.0557143	0.433964	0.458521	0.153034	0.294353	0.379136	0.377955	0.295935	0	0.0732914	0.170525	0.0264658	0	0.0619153	0.0709144	0	0	0	0	0	0	0.0271915	0	0.0046012
289.06	33.9517	49.0188	57.2302	69.2418	102.677	124.893	132.846	156.278	214.596	222.222	213.609	224.034	237.6	225.626	206.46	158.798	38.6716	0	0	0	0	0	0	0	0.112003	0	0.634657	0.338651	0.319361	0.334559	0.38147	0.315619	0.181543	0.00940884	0.112174	0.179347	0.000626487	0.0122037	0.0631389	0	0	0	0	0	0	0.0151363	0.00988326	0	0
290	26.9435	53.2364	60.3987	74.3974	107.329	131.049	136.094	157.011	211.015	220.342	213.857	224.343	237.311	228.687	217.988	172.761	87.1893	0	0	0	0	0	0	0	0.260214	0.155536	0.47778	0.495843	0.23221	0.483708	0.467554	0.254156	0.130288	0.102348	0.0772083	0.115456	0.0659918	0.0538697	0.0243844	0.0169459	0	0	0	0	0	0	0.0137613	0	0
290.93	36.893	59.8797	63.6019	74.6632	108.374	138.891	139.681	157.045	207.572	217.534	210.318	221.52	233.189	227.429	225.431	187.307	118.349	0	0	0	0	0	0	0	0.343494	0.265472	0.380515	0.429805	0.450748	0.391799	0.485782	0.12864	0.139168	0.17295	0.113577	0.0207824	0.131558	0.0923841	0.0636063	0.0476922	0	0	0	0	0	0	0	0	0
292.03	42.2447	67.2497	58.9021	77.0062	113.994	148.579	144.215	156.75	202.308	212.472	205.263	215.378	228.824	224.357	232.15	203.326	142.596	0	0	0	0	0	0	0	0.365474	0	0.0471152	0.495793	0.553499	0.326614	0.458555	0.104844	0.145242	0.234	0.117787	0.0615473	0.0712262	0.0593892	0.0752309	0.0883234	0	0	0	0	0	0	0.0161483	0	0.000545552
292.96	37.622	60.8522	59.959	74.7659	116.804	151.271	147.64	155.051	196.776	204.499	197.513	208.67	224.27	222.142	237.501	217.16	158.787	0	0	0	0	0	0	0	0	0	0.332585	0.296605	0.544982	0.294862	0.32671	0.308227	0.142789	0.238512	0.143934	0.158084	0.0967989	0.134733	0.100749	0.0395657	0	0	0	0	0	0	0	0	0
294.06	40.7719	58.3848	54.2366	71.4842	117.982	152.221	148.974	152.492	192.446	195.728	190.879	202.363	219.086	220.448	244.708	227.799	170.004	34.02	0	0	0	0	0	0	0	0	0.470973	0.218341	0.274944	0.396667	0.330269	0.265284	0.293819	0.225002	0.0291317	0.211056	0.0665205	0.053895	0.0450649	0	0	0	0	0	0	0	0	0.0101551	0
295	35.9285	60.5642	48.2383	63.5577	116.26	153.225	151.283	149.851	188.454	191.629	184.157	196.199	212.032	217.692	249.069	237.516	181.028	69.2595	0	0	0	0	0	0	0	0.0199339	0.409826	0	0.177609	0.243354	0.185018	0.108118	0.276916	0.252297	0	0.17393	0.120191	0.0389313	0.0592801	0	0	0	0	0	0.000305866	0	0	0	0.0220368
295.93	25.3648	60.1142	47.8387	58.9725	116.933	159.551	154.221	147.669	183.11	186.484	179.564	188.995	205.775	216.416	251.749	247.073	189.887	89.3183	0	0	0	0	0	0	0	0	0.229334	0.0693562	0.297936	0.175251	0.262569	0	0.125135	0.284035	0	0.0837964	0.0147278	0.0180546	0.0578191	0	0	0	0	0	0	0	0	0	0.00823027
297.03	29.5387	51.6426	50.9282	54.6348	114.817	164.465	156.103	145.235	176.002	180.986	174.803	183.271	201.662	213.946	256.97	256.762	198.612	102.617	0	0	0	0	0	0	0	0	0.164883	0.0704995	0.323299	0	0.33461	0.0922518	0.0547586	0.301065	0	0	0	0.059696	0.121747	0	0	0	0	0	0	0	0	0	0
297.96	34.0192	49.882	55.1101	59.7393	116.426	165.826	155.041	143.806	170.572	174.336	169.151	178.558	197.604	211.644	261.433	266.261	207.717	110.269	0	0	0	0	0	0	0	0	0	0.107408	0.401601	0	0.170197	0.1889	0.131844	0.23428	0	0	0	0.00177606	0.095541	0.00599402	0	0	0	0	0	0	0	0.0191593	0
299.06	27.448	42.395	52.816	67.9031	121.99	164.048	155.643	141.913	166.535	169.098	161.714	175.021	191.691	207.737	262.832	270.728	214.877	114.151	0	0	0	0	0	0	0	0	0	0.0821959	0.157483	0.210053	0	0.411769	0.12324	0.133707	0.0319189	0	0.0452801	0.00825189	0.0577739	0	0.0135809	0	0	0	0	0	0	0.0215443	0
300	26.5609	41.8731	53.445	62.5085	121.859	165.067	154.394	140.464	161.556	163.934	154.37	168.531	184.434	202.69	261.958	275.258	219.856	119.08	3.62876	0	0	0	0	0	0	0	0.0470733	0.0864863	0.0153156	0.384254	0.0952214	0.287733	0.128819	0.120471	0.0672119	0.142979	0.14179	0.00350727	0.0414856	0	0	0	0	0	0	0	0	0	0.00505001
301.07	42.5418	41.5331	51.8318	59.1548	120.982	167.686	154.73	135.964	156.634	157.277	149.555	161.604	177.46	197.669	262.695	277.318	223.636	121.767	22.8628	0	0	0	0	0	0	0	0.247484	0.136695	0.0513096	0.367219	0.465612	0.275624	0.201871	0.187421	0.0471215	0.103723	0.0677991	0	0.0577547	0	0	0	0	0	0	0	0	0	0
302	43.6186	43.2504	55.5221	62.2721	114.689	169.705	153.196	131.362	147.578	150.092	142.576	154.36	170.354	192.504	259.637	280.205	228.108	124.64	33.9094	0	0	0	0	0	0	0	0.205794	0.195083	0.309036	0.230004	0.550109	0.162311	0.273736	0.256539	0.0614221	0	0	0	0	0	0	0	0	0	0	0	0.00356469	0	0
303.07	37.4383	41.4955	46.0431	69.6772	113.47	168.997	154.165	127.058	140.918	143.264	135.947	147.158	163.361	187.609	256.399	281.439	229.898	125.645	37.0401	0	0	0	0	0	0	0	0.0662321	0.390087	0.434526	0.246122	0.417954	0.206168	0.2146	0.343553	0	0	0	0.0702547	0	0	0	0	0	0	0	0	0	0	0
304	34.2112	41.2924	38.7885	67.8928	110.185	165.889	153.2	125.65	134.618	138.671	131.125	140.453	158.643	182.448	255.317	283.524	229.696	126.625	37.6974	0	0	0	0	0	0	0	0	0.376347	0.447369	0.342927	0.332767	0.137299	0.212511	0.260808	0	0.0756214	0	0.0667385	0	0	0	0	0	0	0	0	0	0	0
305.07	37.1833	35.5551	33.7664	65.9366	114.471	164.018	152.199	124.362	131.798	134.213	127.419	135.051	154.372	179.343	253.704	281.615	229.156	126.347	38.2249	0	0	0	0	0	0	0	0	0.261009	0.243556	0.462945	0.319929	0.268313	0.203416	0.13814	0	0.0289924	0.00727865	0.0216315	0	0	0	0	0	0	0	0	0	0	0
306	27.1764	35.3243	36.1536	62.6702	113.382	162.54	149.959	121.588	127.028	127.959	121.317	131.008	148.096	175.227	251	278.706	229.509	125.694	38.7207	0	0	0	0	0	0	0	0	0.0531208	0.0482492	0.232424	0.311862	0.252109	0.195985	0.12008	0.0619773	0.0618366	0.0264728	0.0220853	0	0	0	0	0	0	0	0.00113833	0	0.0278545	0
307.07	26.7332	35.6029	41.7331	54.3263	113.364	158.802	145.7	117.502	122.101	122.049	115.564	126.083	141.494	170.274	247.536	276.903	229.439	125.061	38.9062	2.64838	0	0	0	0	0	0	0	0	0.0968256	0.0568314	0.338548	0.156365	0.207764	0.19055	0.120537	0.126671	0.0282233	0.100967	0.025707	0	0	0	0	0	0	0	0	0.0441104	0
308	33.6545	34.5215	41.9738	51.842	104.988	152.753	141.398	112.894	114.918	116.77	112.434	120.124	136.594	164.385	241.958	275.743	226.493	123.756	38.5331	4.90081	0	0	0	0	0	0	0	0	0.252378	0.0224822	0.266971	0.0917223	0.189286	0.171518	0.143042	0.0106379	0.0675146	0.116205	0.103217	0	0	0	0	0	0	0	0	0.0258499	0
309.07	42.1304	30.1479	39.0008	48.5488	103.709	150.136	138.766	109.092	109.87	112.544	108.544	115.372	131.9	159.148	236.921	271.43	222.785	122.354	38.3582	5.55553	0	0	0	0	0	0	0	0	0.0636671	0.231422	0.146238	0.0941104	0.162431	0.126446	0.139433	0	0.124236	0.117471	0.0799951	0	0	0	0	0	0	0	0	0	0
310	34.4234	25.2005	31.939	43.2693	102.394	150.07	137.041	106.575	107.369	108.006	104.062	112.546	127.319	155.071	232.794	267.31	218.78	120.264	38.6175	5.76368	0	0	0	0	0	0	0	0	0	0.144912	0	0.116071	0.101547	0.094755	0.070162	0	0.0754704	0.0398658	0	0	0	0	0	0	0	0	0	0	0
310.93	27.0654	25.6765	28.7538	37.3258	101.342	148.66	132.251	104.168	104.894	103.574	99.446	109.555	122.967	150.67	228.264	263.26	215.803	118.256	38.5481	5.93252	0	0	0	0	0	0	0	0	0	0	0.184598	0.02871	0.127925	0.076851	0	0.0909669	0	0	0	0	0	0	0	0	0	0	0	0	0
312.03	15.159	30.1133	24.2619	38.4449	92.3651	145.324	128.438	101.418	101.284	100.184	95.7097	104.391	118.548	144.916	221.244	257.911	212.14	116.519	37.494	5.88953	0	0	0	0	0	0	0	0	0.0604666	0	0.222403	0.129476	0.0460787	0.162515	0.0513803	0	0	0	0	0	0	0	0	0	0	0	0	0	0
312.96	13.6572	26.7313	20.336	37.6482	91.1265	137.465	126.625	96.9021	97.2076	96.5544	90.1458	99.5613	113.29	138.918	215.403	250.485	207.997	114.454	36.8161	6.49371	0	0	0	0	0	0	0	0	0	0	0.219267	0.184202	0	0.169494	0.0322111	0	0	0.0483102	0	0	0	0	0	0	0	0.000188748	0	0	0
314.06	16.2948	23.7078	21.4573	34.8115	93.6152	132.854	125.748	93.8685	92.6742	92.8329	86.7615	96.0868	108.954	134.635	209.612	244.497	201.059	111.82	36.4634	7.06643	0.529241	0	0	0	0	0	0	0	0	0.04828	0.031825	0.243887	0	0.0847131	0	0.0700451	0.0954341	0.0109255	0	0	0	0	0	0	0	0.0152478	0	0	0
315	22.9099	24.8851	23.1717	34.2413	92.5777	131.026	121.343	92.7183	89.5391	88.2751	84.6838	93.3392	105.845	131.376	204.524	238.311	195.364	109.396	35.4569	7.23666	1.1561	0	0	0	0	0	0	0	0	0.260184	0.149556	0.0707522	0	0.00829293	0	0.0841149	0.0684395	0	0.0166152	0	0	0	0	0	0	0	0	0	0
315.93	16.1656	31.0536	27.5218	31.2774	87.1984	130.923	116.793	91.4758	86.5564	85.4005	82.3451	89.2765	102.131	126.746	198.819	231.031	191.089	106.931	34.5057	7.14363	1.34425	0	0	0	0	0	0	0	0	0.223776	0.153572	0	0	0.0252262	0.0348588	0	0.012815	0	0	0	0	0	0	0	0	0	0	0	0
317.03	8.50792	24.6713	29.7448	30.8483	82.3808	126.186	110.351	87.3216	83.5625	83.0289	78.4614	85.1466	98.0358	121.84	192.435	224.114	187.706	103.901	33.4381	7.10788	1.34778	0	0	0	0	0	0	0	0	0	0.0836459	0	0	0.107876	0.0459257	0	0.0831212	0.015603	0	0	0	0	0	0	0	0	0	0	0
317.96	11.7095	21.2589	31.6469	34.7213	82.0962	120.795	107.111	81.4862	79.6155	80.0497	75.6456	81.4696	94.4617	116.573	183.723	217.428	180.387	101.009	32.2568	7.47309	1.8857	0	0	0	0	0	0	0	0	0	0	0.0862852	0.0527996	0.172334	0	0.0226173	0.0356028	0.0647136	0.0491638	0	0	0	0	0	0	0	0	0	0
319.06	17.9716	21.2071	30.4408	34.7393	75.4217	114.331	103.482	77.3291	77.4704	75.6736	73.1759	78.5486	91.35	112.869	177.431	208.391	174.542	98.629	31.3791	7.73407	2.37157	0	0	0	0	0	0	0	0	0	0	0.170128	0	0.104873	0	0.0730657	0	0.0599411	0	0	0	0	0	0	0	0	0	0	0
320	18.593	19.7176	27.4282	20.7157	69.9047	106.628	100.713	74.4897	74.9251	72.7883	69.6491	76.0307	87.7448	109.738	172.106	202.074	169.56	96.0874	31.4511	7.83971	2.96058	0.519758	0	0	0	0	0	0	0	0	0.0684349	0.181103	0.034474	0	0	0	0.00126952	0.0129404	0	0	0	0	0	0	0	0	0	0	0
320.93	12.9685	26.9712	21.5933	22.0966	66.0951	103.344	95.1637	71.8152	72.0544	70.465	66.3763	73.2863	83.801	105.304	166.375	195.716	166.247	93.1458	30.7782	7.80711	3.27657	1.02173	0	0	0	0	0	0	0	0	0.00729412	0.117918	0	0	0	0	0.0305886	0	0	0	0	0	0	0	0	0	0	0	0
322.03	15.4857	25.0013	25.6652	24.1807	65.6196	98.4335	88.3564	68.69	68.3594	67.8385	64.2234	69.9467	79.4108	100.31	159.131	188.584	159.612	89.9974	29.8666	7.84839	3.74412	1.42188	0	0	0	0	0	0	0	0	0	0	0	0	0	0	0	0	0	0	0	0	0	0	0	0	0	0	0
322.96	14.127	17.8527	21.8751	21.4744	63.7758	94.4585	82.7068	64.7007	64.7351	64.7604	61.9715	66.2818	75.7238	95.5698	152.375	178.202	151.797	87.1259	29.1264	7.59989	4.08399	1.61984	0	0	0	0	0	0	0	0	0	0	0	0	0	0.00365337	0	0	0.0641889	0	0	0	0	0	0	0	0	0	0
324.06	8.23366	8.14128	24.928	9.91073	57.2142	86.5171	78.5467	62.4151	61.0823	61.8891	59.0827	62.3442	72.556	91.6794	146.647	172.027	145.946	83.8358	29.0817	7.60706	4.38727	1.87719	0.120078	0	0	0	0	0	0	0	0	0	0	0	0	0	0	0	0	0	0	0	0	0	0	0	0.0151992	0	0
325	4.00154	6.61521	19.4742	14.0593	52.253	82.7116	77.632	60.0153	59.4258	59.0766	56.6433	60.1513	70.1772	87.8578	140.483	165.75	140.938	81.014	28.855	8.02353	4.56422	2.28839	0.690398	0	0	0	0	0	0	0	0	0	0	0	0	0	0	0	0	0	0	0	0	0	0	0	0	0	0
325.93	1.98193	11.3861	18.6348	12.7112	44.1106	77.9854	73.5466	57.9055	57.882	56.9065	54.2205	58.6175	66.6069	85.3933	134.784	158.805	135.767	78.2732	28.6579	8.47215	4.88698	2.82933	1.04085	0	0	0	0	0	0	0	0	0	0	0	0	0	0	0	0	0	0	0	0	0	0	0	0	0	0
327.03	7.86823	18.5471	7.96885	19.0117	41.6489	76.2347	70.3362	54.9783	55.8524	54.9681	51.4264	56.9767	63.3575	82.2817	128.676	151.914	129.617	76.5629	28.3298	8.75043	5.20445	3.13713	1.38402	0	0	0	0	0	0	0	0	0	0	0	0	0	0.0240053	0.024496	0	0	0	0	0	0	0	0	0	0	0
327.96	10.7594	16.7119	10.0403	21.4186	40.482	70.0509	65.4984	53.4993	51.941	53.242	49.2048	53.3593	60.4252	78.0386	122.458	145.855	124.864	74.1954	28.4851	9.13013	5.64382	3.7279	2.03942	0	0	0	0	0	0	0	0	0	0	0	0	0	0	0	0	0	0	0	0	0	0	0	0	0	0
329.06	23.5624	9.91329	11.0752	19.0889	44.4341	63.8951	63.3422	51.7567	49.4535	50.8141	47.8017	51.1624	58.2944	74.2194	117.746	139.373	119.993	72.0314	28.159	9.75673	5.90074	4.11796	2.58509	0.285205	0	0	0	0	0	0	0	0	0	0	0	0	0	0	0	0	0	0	0	0	0	0	0	0	0
330	14.4362	7.90907	19.161	13.3506	41.4237	60.4495	60.6264	49.4653	47.3483	48.6085	45.6466	49.3366	56.3827	71.0626	112.589	132.045	115.736	69.871	27.8471	10.3846	6.21534	4.77209	3.02441	0.84302	0	0	0	0	0	0	0	0	0	0	0	0	0	0	0	0	0	0	0	0	0	0	0	0	0
331.07	0	9.98235	21.2257	18.243	35.8518	59.6934	57.9642	46.2015	46.4623	46.1408	43.2561	47.6672	53.9293	68.2484	108.246	127.871	111.153	68.5275	28.4007	11.0969	6.60568	5.12539	3.33391	1.30343	0	0	0	0	0	0	0	0	0	0	0	0	0	0	0	0	0	0	0	0	0	0	0	0	0
332	0	5.23036	13.8634	19.1226	34.3955	56.4104	54.202	43.7462	43.7345	44.7431	40.8729	44.5963	51.677	64.9485	102.66	123.177	105.492	66.7436	29.246	12.0066	7.07323	5.54445	3.95777	1.64986	0	0	0	0	0	0	0	0	0	0	0	0	0	0	0	0	0	0	0	0	0	0	0	0	0
333.07	7.57434	1.21337	3.19729	15.4785	31.6055	51.6368	51.0814	42.0451	41.9624	42.5948	39.4008	42.2689	48.8893	61.986	97.9019	117.888	101.485	64.5524	29.1649	13.0196	7.705	5.54777	4.5224	2.2516	0	0	0	0	0	0	0	0	0	0	0	0	0	0	0	0	0	0	0	0	0	0	0	0	0
334	19.4663	0	4.67223	10.3613	27.1393	48.776	48.4009	39.7266	40.6611	40.6859	37.9668	40.1815	46.5426	58.8349	93.0745	111.883	98.3099	62.5778	28.9576	14.0835	8.67154	5.80954	5.08939	3.08471	0.86599	0	0	0	0	0	0	0	0	0	0	0	0	0	0	0	0	0	0	0	0	0	0	0	0
335.07	15.6902	10.6381	8.59392	6.01723	22.9067	47.0122	44.9818	37.9806	40.0054	38.9577	36.7954	38.6579	44.2786	56.1012	90.0281	107.799	95.4974	61.2075	29.1156	14.9163	9.57383	6.40181	5.56581	3.60053	0.983483	0	0	0	0	0	0	0	0	0	0	0	0	0	0	0	0	0	0	0	0	0	0	0	0
336	9.79974	18.8761	6.52749	4.71699	25.1901	45.2767	40.9258	36.3768	37.8901	37.5505	35.0864	36.955	42.3971	53.4844	86.8549	103.934	91.4056	59.7359	29.6943	15.9227	10.2205	7.12474	6.46127	4.16591	1.66665	0	0	0	0	0	0	0	0	0	0	0	0	0	0	0	0	0	0	0	0	0	0	0	0
337.07	3.46902	17.3774	1.80098	6.29842	24.2993	42.385	38.712	35.2858	36.0571	35.7074	33.3102	35.7007	41.0434	51.6578	84.1329	99.6709	87.2535	58.7827	30.2108	16.8158	11.2909	7.97949	6.96072	5.03092	2.19607	0	0	0	0	0	0	0	0	0	0	0	0	0	0	0	0	0	0	0	0	0	0	0	0
338	6.59492	8.74582	0	9.78802	22.353	38.3935	37.1144	33.3892	34.2117	33.8171	32.0045	34.0391	39.1662	49.6884	80.3819	95.2807	83.6233	57.2892	30.8013	18.1478	12.7375	8.65537	7.73215	5.85529	2.88891	0	0	0	0	0	0	0	0	0	0	0	0	0	0	0	0	0	0	0	0	0	0	0	0
339.07	0	6.9845	0	6.15143	17.1703	35.372	36.23	31.3432	33.2079	32.5396	30.6453	33.2858	37.0123	47.6615	77.0389	92.4221	81.1674	56.8065	31.2188	19.6557	14.0554	9.45396	8.23335	6.04637	3.76493	1.2779	0	0	0	0	0	0	0	0	0	0	0	0	0	0	0	0	0	0	0	0	0	0	0
340	0	6.65776	0.605896	1.28919	17.3289	34.0229	34.8154	29.7085	32.5694	31.824	29.7561	31.7326	35.1172	45.857	74.1066	89.6849	79.7795	55.9419	31.5926	20.6222	15.2724	9.98453	8.94778	6.72115	4.62041	2.36746	0	0	0	0	0	0	0	0	0	0	0	0	0	0	0	0	0	0	0	0	0	0	0
340.93	0	4.98499	5.15296	1.41269	16.5517	32.6095	33.8035	28.8126	31.4294	31.336	28.1572	29.8177	34.0141	43.9199	71.7046	86.3328	77.4183	55.041	32.0542	21.5009	16.2644	11.2225	9.30546	7.81132	5.42591	2.86984	0	0	0	0	0	0	0	0	0	0	0	0	0	0	0	0	0	0	0	0	0	0	0
342.03	2.78144	4.70506	2.0983	5.04572	18.6227	29.9385	32.2132	29.0274	30.7592	29.5292	26.6961	28.0488	32.2702	41.6172	68.9037	83.059	75.4055	54.3561	32.9513	22.7383	17.4859	12.4739	10.168	9.05574	6.1185	3.69333	0	0	0	0	0	0	0	0	0	0	0	0	0	0	0	0	0	0	0	0	0	0	0
342.96	0	0	2.01486	2.39248	16.8365	29.6877	30.0257	27.9472	29.4439	28.175	24.7338	27.4821	30.1953	40.2145	66.0166	81.0377	73.7447	54.3027	33.7405	24.1228	18.7657	13.9824	11.2717	9.96574	7.31992	4.92387	1.55827	0	0	0	0	0	0	0	0	0	0	0	0	0	0	0	0	0	0	0	0	0	0
344.06	1.62804	0	3.90668	0	15.8244	28.6859	28.5323	26.5616	28.2389	27.3227	24.3911	26.6265	29.2985	39.3807	63.8338	79.0006	73.0618	53.3188	34.2644	25.3291	20.5402	15.3376	12.5842	10.9235	8.47535	6.30743	3.05723	0	0	0	0	0	0	0	0	0	0	0	0	0	0	0	0	0	0	0	0	0	0
345	8.522	0.0128667	8.05699	0	13.8536	27.3271	28.0374	24.8323	27.0887	26.7374	23.8998	25.4076	29.1398	38.1642	62.5454	77.5183	72.3921	52.5948	35.113	26.2017	22.2495	16.9364	13.6869	11.6782	9.78833	7.52598	4.13461	0	0	0	0	0	0	0	0	0	0	0	0	0	0	0	0	0	0	0	0	0	0
345.93	9.88638	3.72566	2.95563	4.11154	10.354	24.0245	27.0223	24.5977	26.5968	25.2752	23.094	24.0365	28.5914	36.5854	62.0095	75.5352	71.2387	53.1141	36.1025	27.5832	23.7944	18.3538	14.8469	13.0735	11.1385	8.93334	5.16825	0	0	0	0	0	0	0	0	0	0	0	0	0	0	0	0	0	0	0	0	0	0
347.03	0	4.4066	5.40687	4.45744	9.17344	23.2407	26.6051	23.7662	26.7081	24.5609	22.0061	22.7448	27.1396	34.6401	60.473	73.6642	70.3303	54.0088	37.062	28.94	25.3216	20.3313	16.6017	14.6887	12.8901	10.7505	7.20319	0	0	0	0	0	0	0	0	0	0	0	0	0	0	0	0	0	0	0	0	0	0
347.96	0	0	0.0636158	3.61893	8.14823	24.3778	26.5047	23.7332	26.1765	23.8737	21.5521	21.9557	25.8476	34.453	58.7548	71.7582	69.1014	54.3602	38.3113	31.4515	27.4455	22.4433	19.2653	16.5779	15.4826	12.8146	9.18024	4.58478	0	0	0	0	0	0	0	0	0	0	0	0	0	0	0	0	0	0	0	0	0
349.06	0	0	0	0	10.1238	26.3602	26.5769	23.6409	25.4897	22.9692	21.0293	21.2616	24.7355	33.3984	57.018	71.1361	68.7412	54.4664	39.9309	33.2581	29.4692	24.9479	22.0185	18.5905	17.8791	15.0331	11.5236	7.22982	0	0	0	0	0	0	0	0	0	0	0	0	0	0	0	0	0	0	0	0	0
350	0	0	0	0	8.54458	25.8904	24.9038	23.084	24.2069	22.0224	20.0464	20.5579	23.8027	32.8276	56.32	70.2536	68.33	55.115	41.8088	35.2771	31.6942	27.6132	24.8311	21.0875	20.0818	17.6965	14.012	9.39647	0	0	0	0	0	0	0	0	0	0	0	0	0	0	0	0	0	0	0	0	0
351.07	0	0.783041	0	0	9.70642	24.9237	25.0049	21.9617	23.8108	22.1695	19.2589	20.0223	23.2874	31.2509	55.8812	69.8438	68.1445	56.5549	43.5025	36.7528	33.047	30.1217	27.7988	23.397	21.936	20.6219	16.9789	12.2475	0	0	0	0	0	0	0	0	0	0	0	0	0	0	0	0	0	0	0	0	0
352	0	1.24345	0	1.05605	10.6882	24.8751	25.2108	22.4882	23.0277	21.6418	18.4606	19.5821	22.1984	30.8805	54.8148	69.0818	68.2555	57.9135	45.2123	39.0142	35.5256	32.5886	30.6969	26.5143	24.7669	23.7127	20.0587	14.9272	6.10251	0	0	0	0	0	0	0	0	0	0	0	0	0	0	0	0	0	0	0	0
353.07	2.71624	0	0	2.11386	11.2784	24.1972	25.883	23.1613	22.6309	20.6411	18.7626	18.8487	21.5451	29.9404	53.7881	69.0315	68.8563	58.515	46.7273	41.3305	37.8638	35.6147	33.8023	30.4485	28.9071	27.2272	23.1952	17.265	10.3878	0	0	0	0	0	0	0	0	0	0	0	0	0	0	0	0	0	0	0	0
354	2.93395	0	8.71719	0.413892	12.986	22.931	25.997	24.2973	22.3904	20.1703	18.028	18.4159	21.0233	29.9878	54.0774	68.8136	69.266	59.7029	48.5661	44.138	41.6474	39.1455	37.5256	34.4652	33.0195	31.8566	26.7148	20.3213	14.1473	0	0	0	0	0	0	0	0	0	0	0	0	0	0	0	0	0	0	0	0
355.07	0	0	6.24768	0.480988	14.895	24.4161	27.3748	25.1781	22.5569	20.2715	17.5517	18.0797	20.7694	29.5334	54.2328	69.7649	69.2516	60.9409	50.246	46.7832	44.2333	41.9766	41.6771	37.7256	36.3518	35.7097	30.3939	23.7715	17.1586	0	0	0	0	0	0	0	0	0	0	0	0	0	0	0	0	0	0	0	0
356	0	0	0	0	11.4428	26.0531	28.3035	26.0636	23.4534	20.2382	16.9707	17.256	19.7896	29.4657	54.0631	70.4261	70.0265	61.9096	52.7642	49.2751	47.5101	44.7785	45.2503	41.4366	39.3844	39.5373	34.3239	26.9863	19.8774	1.76204	0	0	0	0	0	0	0	0	0	0	0	0	0	0	0	0	0	0	0
357.07	0	0	0	0	8.99052	27.1579	29.0983	26.5618	24.0054	19.5256	17.1412	16.8178	19.1609	29.6338	53.3891	70.9221	70.7276	63.4065	55.1286	51.5272	49.8289	47.9974	48.8296	45.4084	43.2902	44.0739	38.4615	30.5511	22.629	10.8754	0	0	0	0	0	0	0	0	0	0	0	0	0	0	0	0	0	0	0
358	0	0	0	0	11.5158	27.7893	30.1524	26.876	24.4209	19.2747	16.442	16.6164	18.717	29.6684	54.0036	70.4153	72.0606	65.4751	57.3449	54.5835	53.4233	52.1923	52.6634	50.4609	47.9393	49.5014	43.2999	35.4231	26.1893	16.3834	0	0	0	0	0	0	0	0	0	0	0	0	0	0	0	0	0	0	0
359.07	0	0	0	0	15.4398	29.5154	31.7128	27.3107	24.348	18.825	16.38	16.7608	18.4796	28.874	54.1761	70.8559	73.511	66.9834	58.7718	57.8492	56.3221	56.2996	57.2106	54.8615	53.4332	54.3799	48.3035	40.6117	29.9386	19.6466	0	0	0	0	0	0	0	0	0	0	0	0	0	0	0	0	0	0	0
360	0	0	0	0	15.3906	31.3821	34.5734	28.5214	24.4595	19.213	16.5992	16.3648	18.5416	28.6346	55.4178	72.38	75.4629	68.4491	61.4713	61.772	59.7163	59.9603	61.2984	59.3586	59.0158	59.6071	53.7353	46.1161	33.9863	22.8385	0	0	0	0	0	0	0	0	0	0	0	0	0	0	0	0	0	0	0
361.07	0	5.15563	0	0	16.9904	32.7367	35.6221	30.3541	24.4535	18.8372	16.0661	16.1461	18.3678	29.0362	56.4354	74.4963	76.0242	70.9863	64.535	64.5576	62.9232	63.2133	65.5475	64.0065	64.4272	64.8789	59.1094	50.8101	38.0707	25.8717	2.693	0	0	0	0	0	0	0	0	0	0	0	0	0	0	0	0	0	0
362	0	7.95819	3.0864	0	16.4173	34.985	36.8572	32.117	25.3711	19.327	15.564	15.5503	18.2125	29.4418	57.7496	75.563	77.6722	74.0276	67.3741	68.0149	67.4612	67.2059	70.1015	69.6822	69.4227	69.9722	65.1523	55.9974	42.5144	29.6003	12.8433	0	0	0	0	0	0	0	0	0	0	0	0	0	0	0	0	0	0
363.07	0.927842	2.45981	0	0.405952	15.1579	38.151	37.8276	33.3694	26.1412	19.5576	15.5634	15.5406	18.3091	29.2439	58.3905	76.7495	80.4499	75.9795	70.0541	71.3315	71.0375	72.2212	76.2788	75.7405	75.7471	76.3651	70.8015	61.8688	47.4415	33.5551	17.467	0	0	0	0	0	0	0	0	0	0	0	0	0	0	0	0	0	0
364	2.84297	3.21617	0	2.20858	13.8594	40.0557	40.8176	34.5716	27.1015	20.1117	15.7042	15.4032	18.6101	29.8181	60.0502	78.8156	83.6192	78.3166	73.7771	75.7053	75.2504	77.4691	82.7086	82.0905	82.7583	83.8422	77.034	69.0685	53.3838	37.8754	20.7842	0	0	0	0	0	0	0	0	0	0	0	0	0	0	0	0	0	0
365.07	0	1.54586	0	2.24261	16.7614	41.1526	42.4252	35.7481	27.9194	20.2946	15.2042	15.6489	18.4156	30.3928	61.0913	81.5492	84.7768	80.8125	77.6207	79.1788	79.57	81.8032	88.1267	87.8203	90.169	90.4451	84.4155	75.6075	59.4904	42.3117	24.2184	0	0	0	0	0	0	0	0	0	0	0	0	0	0	0	0	0	0
366	0	0	0.584879	2.361	16.7268	41.4405	44.928	38.1728	28.794	21.1681	15.263	15.4616	18.3365	30.3852	61.9465	82.9852	86.226	84.4485	80.7983	83.5511	84.4659	86.8786	93.1527	93.3263	96.6236	96.3467	92.3714	81.5827	65.2423	46.1877	27.197	0.982032	0	0	0	0	0	0	0	0	0	0	0	0	0	0	0	0	0
367.07	2.89398	0	0	4.8956	19.0367	44.1375	47.1055	40.6036	30.1273	21.5446	15.904	15.2939	18.4214	30.3945	62.9235	85.4854	88.9943	87.2582	84.4811	87.0435	88.4882	91.5911	98.4179	98.5547	102.214	102.833	99.1968	87.4503	69.8509	49.9227	29.7034	10.253	0	0	0	0	0	0	0	0	0	0	0	0	0	0	0	0	0
368	18.8552	9.98446	7.91543	4.08251	20.0986	46.1592	49.5973	42.3112	31.5221	22.1199	16.1166	15.1514	19.1003	31.0421	64.7296	87.7502	92.6781	90.5957	88.3037	91.8076	93.8252	97.3946	104.7	106.045	109.164	111.496	104.983	94.242	75.5447	54.5658	32.6757	14.9041	0	0	0	0	0	0	0	0	0	0	0	0	0	0	0	0	0
369.07	8.57286	10.0866	11.9075	2.75683	21.8092	48.7849	52.1069	43.6092	32.436	22.2785	16.674	15.7371	19.4254	31.8329	65.8624	89.9218	95.4765	93.0849	92.3142	96.8723	99.6599	103.111	110.935	112.954	116.677	120.782	111.613	101.433	81.5895	59.5511	36.4017	18.2492	0	0	0	0	0	0	0	0	0	0	0	0	0	0	0	0	0
370	0	0	11.2369	3.51073	20.9707	49.8723	55.9322	46.2329	33.6661	22.2963	17.1436	16.4782	19.6204	32.2972	67.3057	91.48	98.3586	96.9168	96.6887	102.927	106.339	110.395	118.209	119.86	125.031	129.682	119.685	108.676	88.1822	64.3882	40.3701	20.8938	0	0	0	0	0	0	0	0	0	0	0	0	0	0	0	0	0
371.07	0	0	6.37426	0	21.0297	52.6077	59.3434	48.814	34.5854	22.7008	17.4685	16.5368	19.3444	32.8026	68.507	94.1778	101.086	100.836	100.998	106.614	112.02	116.051	125.308	124.213	131.269	136.953	127.21	115.457	93.7177	68.5734	43.5246	22.582	3.85005	0	0	0	0	0	0	0	0	0	0	0	0	0	0	0	0
372	0	0	5.81362	0	24.2138	55.5927	61.2619	50.5998	35.9541	23.3016	16.9405	16.4298	19.5253	33.5507	69.8787	96.3306	103.68	105.577	104.878	111.996	117.295	122.121	131.76	130.828	137.391	144.505	134.889	122.306	99.9123	73.4704	46.9133	24.7897	10.3694	0	0	0	0	0	0	0	0	0	0	0	0	0	0	0	0
373.07	0	0	8.31884	2.23811	26.1608	59.1703	63.4857	52.1048	36.0321	23.914	17.1645	16.2609	19.5873	35.022	72.3152	99.3738	106.151	109.137	109.306	117.843	122.038	127.186	138.633	137.787	144.228	151.945	141.746	129.416	105.945	78.2814	50.3444	27.1142	12.9967	0	0	0	0	0	0	0	0	0	0	0	0	0	0	0	0
374	4.02492	6.0202	12.0882	11.5186	29.0309	62.4794	66.1219	55.0951	37.4983	24.3615	17.4699	16.7913	20.0525	35.912	75.7885	102.879	110.022	112.464	115.107	124.838	128.433	134.276	145.33	145.101	152.446	160.116	149.244	137.29	111.647	84.1233	53.6367	29.96	15.2691	0	0	0	0	0	0	0	0	0	0	0	0	0	0	0	0
375.07	3.10104	10.7214	25.5748	7.26929	30.5292	65.8465	68.9997	57.884	38.5595	25.2976	17.7673	16.803	20.2507	36.3597	77.4183	105.24	113.103	115.578	119.697	129.599	135.016	140.577	152.115	151.497	160.48	167.631	157.506	143.582	118.006	88.8157	56.8917	32.425	17.2133	0	0	0	0	0	0	0	0	0	0	0	0	0	0	0	0
376	3.57678	16.4493	22.9011	10.0365	36.2157	67.6394	72.3017	59.3324	40.3575	25.4912	17.9426	16.6805	20.9936	36.7965	78.5631	107.125	116.473	120.191	125.055	135.702	142.588	146.513	156.788	157.909	167.118	175.846	166.39	149.292	124.394	94.5081	60.9591	35.643	19.3115	2.30661	0	0	0	0	0	0	0	0	0	0	0	0	0	0	0
377.07	4.86814	14.0541	17.5514	10.3258	36.6526	70.3765	74.216	60.4623	40.9337	25.9378	19.0076	16.9231	21.3051	37.7141	79.3508	110.536	119.64	123.381	129.594	141.898	148.873	152.619	163.525	164.293	173.371	180.988	172.167	155.262	129.524	98.4151	64.6269	37.9998	20.9754	7.73599	0	0	0	0	0	0	0	0	0	0	0	0	0	0	0
378	12.4462	20.7189	3.89696	16.4493	33.8151	71.1311	76.8825	62.9184	42	26.8548	19.5506	17.4189	22.0169	38.4239	81.3649	112.445	123.369	128.035	133.788	148.219	154.157	159.964	169.766	169.354	178.102	187.882	177.073	162.767	135.072	102.866	68.079	40.2074	22.6336	10.9106	0	0	0	0	0	0	0	0	0	0	0	0	0	0	0
379.07	7.28165	0.547048	6.94292	13.3495	32.1579	74.2788	79.9002	66.0348	43.3056	28.384	19.1227	18.0218	21.9051	39.1243	83.7028	113.605	126.759	132.374	137.655	152.902	158.594	166.995	176.256	175.663	183.692	193.187	185.264	169.899	141.364	106.949	71.686	42.6413	24.6125	12.8678	0	0	0	0	0	0	0	0	0	0	0	0	0	0	0
380	0	0	15.3218	13.6847	36.4176	80.1757	84.2773	68.8633	44.6098	29.3316	19.0748	18.6098	22.2158	39.5646	86.1855	116.06	129.64	137.333	143.8	157.824	164.938	172.911	181.547	181.816	190.909	201.836	193.202	176.62	148.381	112.694	75.9246	45.8051	27.253	14.7638	0	0	0	0	0	0	0	0	0	0	0	0	0	0	0
381.07	0	4.18852	13.6329	12.6127	39.4052	86.1671	85.78	70.9771	46.5158	29.5076	19.6669	19.174	22.1915	40.2079	87.718	120.093	133.243	140.775	150.222	164.098	171.572	178.898	188.315	187.735	198.55	208.573	200.487	182.761	154.533	117.629	80.1959	48.7162	29.8242	16.6344	0	0	0	0	0	0	0	0	0	0	0	0	0	0	0
382	1.24163	18.8604	9.85805	10.365	39.5696	86.5335	88.271	72.613	48.0359	29.2311	20.2741	19.1658	22.4617	41.5019	89.2203	122.734	137.456	146.667	154.918	171.452	178.692	184.424	196.124	192.84	204.795	215.428	206.939	190.667	160.816	122.52	84.0195	51.9332	31.8082	18.3397	6.47158	0	0	0	0	0	0	0	0	0	0	0	0	0	0
383.07	9.25637	19.4713	8.03959	11.9926	39.4346	87.446	90.4003	74.074	48.9205	29.4267	20.8275	19.2982	22.6131	42.34	90.2836	126.267	141.356	149.926	159.944	177.534	185.925	190.742	202.373	198.707	210.059	220.347	215.841	197.944	165.821	126.877	87.8797	54.871	34.0684	19.9561	9.18772	0	0	0	0	0	0	0	0	0	0	0	0	0	0
384	13.7308	17.0485	16.2171	10.8679	39.1041	87.7896	93.1659	77.064	49.4044	30.4046	21.197	19.3636	22.4427	42.9044	91.5411	129.174	144.163	153.621	165.344	182.269	192.575	196.835	206.946	206.495	215.313	227.383	221.942	204.286	171.832	131.634	91.7993	58.1816	36.5956	22.0566	11.1264	0	0	0	0	0	0	0	0	0	0	0	0	0	0
385.07	7.17844	12.2052	15.8893	19.9957	39.6137	89.5072	98.2293	80.5778	50.989	31.8	21.6065	19.1093	22.8497	42.802	93.4306	131.077	147.344	157.827	171.585	188.764	197.235	202.652	212.16	213.318	220.546	233.957	227.611	208.435	178.233	137.432	96.0646	61.4837	39.6147	24.327	12.7592	0	0	0	0	0	0	0	0	0	0	0	0	0	0
386	13.0357	15.9935	12.7147	18.3071	43.396	91.4923	103.478	82.087	52.6131	33.206	21.8924	18.9706	23.3589	43.0732	95.1674	132.455	150.637	163.823	177.096	194.938	204.134	208.391	219.572	219.376	227.341	239.308	231.6	215.493	182.842	143.113	99.903	65.5383	43.2007	26.9447	15.0167	0.0369053	0	0	0	0	0	0	0	0	0	0	0	0	0
387.07	17.5666	21.3448	6.13484	20.5144	48.6898	95.8328	105.788	83.3158	53.2845	33.3761	22.0478	19.6906	24.8188	43.7953	96.5325	134.385	154.032	167.079	181.957	200.098	210.41	214.977	226.272	223.29	233.749	245.007	238.132	222.62	186.961	145.921	103.454	68.9343	46.4972	29.5118	17.2113	6.98365	0	0	0	0	0	0	0	0	0	0	0	0	0
388	27.9506	10.3211	13.3636	20.2044	51.1342	97.6676	105.752	83.9123	54.1322	33.8771	21.963	20.8123	25.1327	44.8088	98.4525	137.261	156.658	170.282	185.651	205.247	217.066	221.334	231.522	229.281	237.483	250.511	242.871	228.445	192.866	150.235	107.458	72.3029	49.2978	31.6838	19.0914	10.9139	0	0	0	0	0	0	0	0	0	0	0	0	0
389.07	19.2186	9.01721	8.66089	22.4279	48.3862	100.549	107.055	85.994	55.6632	33.9474	22.4653	21.3719	25.6509	45.4096	99.2968	140.009	159.323	173.672	188.64	211.76	221.4	228.281	236.014	235.99	240.282	256.517	248.001	233.457	199.094	156.028	111.604	75.3592	51.6431	34.0006	21.193	13.4903	0	0	0	0	0	0	0	0	0	0	0	0	0
390	11.8035	14.016	5.79545	19.1215	47.1047	100.458	107.642	88.8105	56.9452	34.5734	23.5851	21.4316	25.9011	46.0819	100.029	143.65	162.695	177.771	193.636	218.054	227.666	234.755	242.478	241.349	245.725	260.643	252.88	240.709	204.353	162.364	116.081	78.9959	55.1684	37.1544	24.19	15.5321	0	0	0	0	0	0	0	0	0	0	0	0	0
391.07	8.60151	23.3974	11.3752	18.5145	51.149	101.539	110.917	91.4017	57.668	35.1348	23.8117	21.5225	26.3614	47.0671	101.352	145.292	166.675	182.106	199.137	223.08	231.632	239.355	248.57	243.107	251.229	264.671	258.881	246.423	208.577	166.186	119.506	82.8136	58.7281	40.6727	27.1923	17.7255	2.84481	0	0	0	0	0	0	0	0	0	0	0	0
392	15.8083	13.8918	28.5272	17.9513	55.1013	103.425	112.877	92.742	59.4272	35.6517	24.4143	22.042	27.0234	47.67	103.546	145.916	170.077	186.35	203.848	227.7	237.679	243.566	253.293	245.204	255.756	267.503	263.049	248.415	211.791	170.002	123.53	87.8323	62.5356	43.9146	30.1743	20.4952	11.0408	0	0	0	0	0	0	0	0	0	0	0	0
393.07	16.7584	9.16628	26.4097	22.5865	55.2455	106.234	115.059	93.0573	61.0323	35.7985	24.5802	22.4923	27.1401	47.7477	104.817	146.304	171.715	190.163	206.294	232.005	242.941	247.082	256.2	249.481	259.285	272.85	268.677	252.025	216.259	172.688	127.761	91.3804	66.0788	46.8605	32.3922	23.0378	14.5215	0	0	0	0	0	0	0	0	0	0	0	0
394	15.2662	9.10549	23.4716	26.0282	53.9439	107.839	115.444	93.7003	61.9819	35.9581	24.7989	23.1865	27.3872	48.2115	106.118	149.159	173.661	192.611	209.407	235.787	248.82	251.945	258.965	254.416	263.576	277.202	273.208	256.66	222.018	176.893	131.829	94.5935	70.0003	50.0679	34.8888	26.147	17.3018	0	0	0	0	0	0	0	0	0	0	0	0
395.07	17.1476	12.5892	22.8075	24.2122	54.5715	109.896	117.479	93.9953	62.5472	37.1982	24.3506	23.1182	27.5263	49.2284	106.649	151.122	175.002	193.617	213.921	240.533	252.422	253.87	262.476	257.117	265.318	280.447	276.058	261.275	226.836	182.018	136.347	98.3955	73.8782	53.4534	37.9663	28.9281	19.6114	0	0	0	0	0	0	0	0	0	0	0	0
396	22.0034	13.2658	20.269	16.1577	55.8533	110.493	119.124	96.1572	63.9686	38.345	25.1281	22.7962	28.0326	50.0785	107.848	152.363	177.004	196.793	218.173	245.306	256.047	258.31	265.769	260.002	268.077	282.863	277.212	264.383	230.589	186.183	140.695	103.416	78.1307	57.2632	42.1459	31.9591	22.8185	5.60912	0	0	0	0	0	0	0	0	0	0	0
397.07	18.8525	17.6788	20.8558	18.4565	54.613	112.195	122.381	99.0599	63.8946	39.0937	25.7731	22.2785	27.9834	49.8275	108.249	153.599	179.112	200.08	221.395	248.599	258.497	261.286	270.164	264.399	271.516	285.382	280.796	264.95	234.62	189.558	145.826	107.581	81.7625	60.7427	46.0571	34.7736	25.9049	13.4315	0	0	0	0	0	0	0	0	0	0	0
398	15.6411	25.6117	18.1788	21.453	57.5507	114.81	124.062	101.78	63.7369	39.1966	26.1795	22.3331	28.0563	50.241	109.639	154.968	180.8	203.324	224.254	250.22	261.479	266.733	274.174	269.128	277.183	288.563	284.257	267.982	239.282	194.918	149.583	111.39	85.7345	64.7497	49.736	38.6886	28.6568	18.0393	0	0	0	0	0	0	0	0	0	0	0
399.07	14.8909	19.008	17.8708	25.5088	60.2275	117.844	123.576	101.639	64.1982	39.1569	26.0211	22.6058	28.6186	50.6805	110.107	156.28	184.406	204.95	227.681	253.78	265.109	269.816	276.748	271.786	278.761	291.671	287.253	271.733	241.836	200.032	152.956	114.809	89.4664	68.731	52.5393	41.6773	31.1042	20.917	0	0	0	0	0	0	0	0	0	0	0
400	13.7063	20.1676	18.4564	25.3843	62.214	119.814	124.584	100.549	64.4382	39.1408	26.2418	23.2564	28.8079	50.8812	111.381	157.902	186.233	207.654	229.573	256.446	268.268	273.365	277.752	273.852	279.429	295.143	287.858	278.302	245.333	203.547	156.398	118.258	94.2107	72.5542	56.0372	44.5736	34.0444	23.0079	0	0	0	0	0	0	0	0	0	0	0
401.07	12.0613	14.469	24.9946	20.5983	58.0006	121.864	126.389	99.9802	65.2449	39.2105	26.7468	23.8491	29.3195	50.9692	110.788	158.747	185.772	209.423	231.883	257.797	271.021	274.702	279.948	275.718	279.807	298.331	291.003	280.177	246.199	206.17	160.605	121.653	97.9313	75.5155	59.4819	47.911	36.9762	25.0979	6.69175	0	0	0	0	0	0	0	0	0	0
402	6.78519	23.4823	24.1749	17.2421	59.3743	122.061	127.236	102.552	66.0021	39.5697	27.0342	24.4055	29.4044	51.6496	112.307	158.442	184.206	211.118	233.941	261.818	273.221	277.077	284.477	277.869	282.303	300.191	293.388	283.066	250.614	209.71	164.229	126.82	101.556	79.4297	63.8712	51.738	40.664	27.5688	14.3769	0	0	0	0	0	0	0	0	0	0
403.07	8.79083	16.0178	27.9321	23.7646	66.6442	120.696	127.83	104.614	66.1003	40.24	27.3722	24.5051	29.2338	51.5826	112.565	158.316	186.752	211.458	236.797	267.09	276.952	278.852	288.078	278.798	281.551	300.613	296.773	284.246	253.654	213.341	166.548	131.188	105.242	83.396	67.3804	54.9527	43.3551	29.9996	17.5246	0	0	0	0	0	0	0	0	0	0
404	11.9117	19.9128	26.4832	27.7864	69.5115	119.992	128.51	104.599	66.2014	40.5157	27.5128	24.656	28.9582	51.5146	113.201	159.47	188.474	213.137	237.787	268.996	279.402	281.657	289.174	279.172	283.513	300.205	297.875	286.926	257.076	216.589	170.435	135.544	109.753	87.5785	71.066	58.3373	46.4763	32.9715	20.1256	0	0	0	0	0	0	0	0	0	0
405.07	11.5001	10.3664	24.3891	22.2939	67.8874	121.638	129.748	104.201	67.6698	40.7537	28.1166	24.9787	29.3786	51.9449	113.078	160.473	188.691	215.532	239.907	268.989	280.908	285.07	290.998	280.581	285.909	302.857	300.495	288.814	259.174	218.353	174.756	138.298	114.005	91.1243	73.7541	62.0227	48.8637	35.4247	21.8504	0	0	0	0	0	0	0	0	0	0
406	11.5959	18.7214	22.4155	17.2262	66.3822	122.75	131.215	104.428	68.8349	40.9197	27.8335	25.0876	29.3821	52.2167	114.72	160.869	189.011	218.652	239.796	270.273	281.651	286.62	291.606	280.771	289.588	304.517	300.451	288.99	263.052	222.331	178.456	141.898	118.101	95.3965	77.0115	66.0322	52.272	37.8793	23.7042	4.0357	0	0	0	0	0	0	0	0	0
407.07	17.4044	14.5763	24.7414	19.0946	66.4587	122.51	131.932	106.717	68.0869	41.8814	28.1529	24.6318	29.2324	52.5251	115.419	161.878	191.817	218.357	241.183	271.24	282.251	285.796	293.323	280.628	291.759	305.513	301.78	289.879	265.737	226.453	180.587	145.681	121.341	99.1559	80.8145	69.55	54.7768	39.937	25.8466	10.5562	0	0	0	0	0	0	0	0	0
408	13.8374	20.0461	19.8454	22.0243	64.1938	122.11	130.961	106.533	68.9685	42.7289	28.6395	24.313	29.4067	52.0485	115.339	162.809	191.995	218.725	242.496	274.414	283.381	286.374	294.979	281.074	292.672	307.361	302.166	293.47	266.554	231.435	183.506	150.187	124.629	102.605	85.3591	72.3602	58.0572	42.5192	27.9571	13.7195	0	0	0	0	0	0	0	0	0
409.07	9.67484	19.799	21.9583	22.1823	64.7278	123.229	130.622	104.477	69.7994	43.361	28.9002	24.6661	30.2433	52.0381	114.605	162.948	192.011	218.428	244.022	275.049	283.558	289.942	297.392	283.783	292.799	309.81	305.764	296.612	269.368	233.188	186.928	153.3	127.894	105.64	88.6042	75.2143	60.7644	44.7754	30.1012	15.4257	0	0	0	0	0	0	0	0	0
410	16.722	19.5152	19.6942	23.0832	64.7345	123.144	132.291	104.737	70.7815	43.5071	28.5794	24.7477	30.707	52.1982	114.233	161.913	191.655	218.897	243.404	274.7	285.936	291.167	296.5	287.475	293.047	312.002	306.467	298.793	271.619	234.926	189.965	155.958	131.684	109.789	91.0795	79.0122	63.6573	47.1828	31.9836	17.1562	0	0	0	0	0	0	0	0	0
411.07	24.056	20.5724	22.6862	23.4842	63.3289	122.102	132.915	107.359	71.0112	43.4681	28.547	25.0329	30.8225	53.191	114.283	162.379	192.01	218.762	242.631	273.571	285.709	291.127	296.082	288.233	292.817	312.546	308.618	299.876	273.793	234.602	193.921	158.972	135.026	112.818	93.6115	82.1758	66.3647	49.1008	33.9741	18.8808	0	0	0	0	0	0	0	0	0
412	17.092	16.8067	19.1918	22.9072	66.2209	123.311	133.25	108.435	70.976	43.6846	29.2051	24.8092	30.188	53.0626	115.036	163.337	192.28	219.403	241.313	274.061	285.537	289.904	295.474	287.653	293.207	311.524	306.837	300.573	274.478	237.184	198.172	163.077	139.393	116.048	97.2955	85.0114	69.449	51.179	35.5394	20.8851	5.47723	0	0	0	0	0	0	0	0
413.07	8.85406	13.066	15.808	20.7539	68.836	123.574	133.103	106.311	70.1014	43.7285	29.3002	25.1134	29.5725	52.7988	115.857	163.851	194.24	219.944	240.68	274.037	284.402	288.602	295.591	284.335	293.27	309.722	307.916	301.068	275.714	238.854	200.058	166.783	143.308	119.126	100.447	88.0294	72.169	53.839	37.6723	22.6056	7.81318	0	0	0	0	0	0	0	0
414	23.8357	13.7303	9.2089	20.4112	64.2936	122.088	134.822	105.862	69.3805	43.8736	29.423	25.371	29.7913	52.2761	115.475	162.75	195.427	220.48	240.174	271.638	284.563	286.633	293.762	284.782	293.695	309.413	306.191	300.991	277.872	241.626	201.34	170.302	146.687	122.73	104.283	91.8575	74.7652	56.7957	39.667	23.7981	9.40458	0	0	0	0	0	0	0	0
415.07	27.7458	19.7097	6.91015	26.5731	59.9089	120.268	132.07	106.49	69.3964	43.9522	29.4149	25.6824	30.1042	52.3421	114.623	161.169	194.472	219.708	239.788	270.936	283.024	286.389	293.129	283.971	291.313	310.391	307.576	301.52	279.637	242.799	203.426	173.244	149.291	125.594	107.643	94.2655	76.8826	59.5234	41.4084	24.735	10.4311	0	0	0	0	0	0	0	0
416	36.1243	12.1593	0	24.7107	59.2235	121.195	131.975	107.156	69.8562	44.1723	29.6297	25.5284	29.8608	52.0754	114.509	161.285	192.966	218.118	239.69	269.86	282.243	286.295	294.239	285.663	293.02	309.487	308.034	301.023	279.674	244.471	207.044	176.522	152.435	128.736	110.919	97.2984	79.7859	61.701	43.4661	26.164	11.6572	0	0	0	0	0	0	0	0
417.07	28.5244	8.80422	0	22.3053	61.5277	123.252	132.417	105.535	70.452	44.5767	29.6079	25.458	29.4755	52.2706	115.016	161.569	192.177	216.561	240.457	271.393	283.23	286.5	295.625	284.335	292.706	307.988	306.271	300.077	279.358	244.718	209.143	179.21	156.099	132.031	113.388	100.1	83.1566	63.78	45.6293	27.7997	12.6188	2.67445	0	0	0	0	0	0	0
418	19.2642	6.96136	0	13.8548	61.6577	122.206	133.502	103.961	71.5856	45.0443	29.3843	25.1254	29.8425	52.1176	115.427	160.893	191.718	215.96	240.513	268.394	283.846	285.904	294.692	283.389	292.829	306.496	305.933	299.457	280.882	244.816	212.983	182.247	159.592	134.464	116.424	103.677	86.5534	65.8987	47.5704	29.6239	14.0987	5.61365	0	0	0	0	0	0	0
419.07	9.55609	4.20953	0	10.0724	67.4689	120.398	130.176	104.376	70.4333	44.6137	29.5286	25.0032	29.6975	52.3178	115.225	160.747	189.971	215.947	239.171	267.179	281.964	284.826	292.151	282.109	291.138	306.765	307.131	301.125	281.583	246.567	214.546	184.996	161.477	138.001	118.209	106.003	88.6592	68.3146	49.2145	31.4615	15.5133	6.7878	0	0	0	0	0	0	0
420	10.472	4.00507	0	9.05955	69.6927	120.034	128.594	104.845	70.0148	43.5924	29.5769	25.5443	29.3674	52.7906	114.224	160.746	188.935	216.585	238.854	267.93	278.454	283.098	289.296	280.644	289.567	306.446	307.234	301.797	280.825	249.124	214.917	187.384	163.9	141.072	121.023	108.41	90.56	70.8972	51.4599	32.9375	17.5669	7.92073	0	0	0	0	0	0	0
421.06	13.6114	4.45098	0	14.0036	67.2955	121.611	128.047	103.104	69.6168	43.8687	29.7722	25.6322	29.0996	52.8932	114.312	161.048	188.014	215.881	238.122	268.669	276.391	284.336	287.007	278.238	286.538	306.216	303.859	300.291	279.767	252.093	214.344	188.757	166.175	144.124	123.552	111.476	92.6764	72.7917	53.3845	33.9059	18.7427	8.85293	0	0	0	0	0	0	0
421.96	19.3129	0	0	14.5115	58.4753	122.239	128.55	101.388	70.2184	44.694	29.3155	25.4431	29.4066	52.2825	114.356	160.861	188.191	213.51	235.278	265.843	274.901	281.821	285.372	275.658	284.851	306.6	302.803	300.42	280.417	254.251	217.177	190.977	170.309	145.47	126.219	113.634	95.1284	75.3275	55.7534	35.4499	19.8843	9.76575	0.752853	0	0	0	0	0	0
423.03	20.285	0	0	0	55.4767	119.495	127.055	101.829	69.3088	45.0561	29.5144	25.1596	29.5499	52.0881	114.024	159.848	187.304	212.195	233.808	262.41	273.57	278.984	285.221	275.034	284.656	304.494	303.34	301.585	281.853	255.019	218.788	193.973	173.789	147.892	127.35	115.753	97.8409	77.5364	57.5071	37.5775	20.8354	10.7572	3.37198	0	0	0	0	0	0
423.93	13.2599	6.8663	0	0	56.7559	119.831	125.487	102.941	69.8062	44.4213	29.7276	25.2976	29.2177	52.5977	112.61	158.154	187.716	211.497	233.682	260.116	268.499	274.91	282.503	273.505	283.52	302.878	301.939	299.558	283.061	255.728	220.804	197.357	177.103	150.721	129.842	118.204	100.375	80.1462	59.3537	39.8261	22.5412	11.9971	5.16353	0	0	0	0	0	0
425	7.68983	16.6672	0	0	55.5387	119.405	124.537	103.009	69.6726	44.0231	29.778	25.1812	28.3725	52.6877	112.049	157.453	186.749	211.945	232.654	258.162	265.391	272.481	279.553	272.235	280.304	299.558	301.093	297.517	283.084	254.747	222.274	199.341	178.337	154.066	133.308	121.261	102.781	81.9693	61.1648	41.6661	24.2266	13.4769	6.24219	0	0	0	0	0	0
426.06	21.1759	15.3352	0	0	52.9578	119.335	127.331	103.785	69.7148	43.6099	29.2046	24.8773	28.8287	52.0826	112.175	156.766	184.466	210.917	228.86	256.444	264.024	269.254	276.152	269.868	278.333	298.835	298.959	296.574	281.209	254.923	222.469	199.828	180.166	155.672	135.908	122.633	105.813	84.4753	63.5118	43.5718	26.1661	14.8027	7.3919	0	0	0	0	0	0
426.96	16.71	14.6094	0	0	52.6785	116.628	126.023	103.996	68.7257	44.0491	28.7301	24.658	29.3016	51.9163	112.342	155.315	182.146	207.94	226.612	254.119	263.24	266.883	274.72	268.102	276.736	295.124	295.174	294.827	279.291	254.641	222.055	199.537	181.134	157.527	137.954	124.016	108.047	86.2443	65.2519	45.6615	28.1958	16.1825	8.30912	0.0822608	0	0	0	0	0
428.03	9.1448	10.4028	0	0	56.5047	116.845	123.089	102.88	68.2175	43.7349	28.8149	24.2407	29.111	51.093	111.549	155.118	180.295	203.257	225.111	251.233	259.212	264.432	271.889	264.791	275.217	293.64	294.764	293.439	276.991	255.397	222.256	200.843	181.996	159.352	139.456	126.843	109.464	88.3234	67.2575	47.5926	30.4204	17.7787	9.57942	3.07507	0	0	0	0	0
428.93	9.92439	8.06786	0	0	53.1075	115.569	119.766	98.9776	67.2198	43.0637	28.7678	24.3708	28.1486	50.3875	110.053	155.219	180.134	201.786	222.768	247.83	255.88	259.613	269.679	261.053	271.446	290.311	292.755	294.443	275.215	252.49	222.86	202.326	183.88	161.133	142.352	129.303	110.848	90.4284	70.0765	49.8612	32.7492	20.3091	11.1336	5.296	0	0	0	0	0
430	15.0014	11.6953	0	0	48.2674	113.469	118.353	96.6937	67.6717	42.5748	28.6538	24.3165	28.3665	50.6637	109.048	154.221	179.451	201.199	218.934	243.83	251.96	257.619	266.738	257.757	269.866	288.658	291.182	291.889	275.364	251.046	222.358	202.86	185.173	162.476	143.462	131.495	113.355	93.3164	72.5165	52.1059	34.891	22.613	13.1679	6.8458	0	0	0	0	0
431.07	12.7249	13.3032	0	0	41.0783	112.264	118.101	94.9067	66.6419	43.1802	28.8378	24.3023	28.3358	50.9718	108.541	152.975	178.638	200.026	215.911	241.556	247.011	253.884	263.7	257.412	266.409	285.516	284.873	287.465	273.527	252.465	223.48	203.841	185.022	164.224	145.371	132.683	115.626	95.699	74.5196	54.1738	36.5635	24.7643	14.7591	8.48627	1.07688	0	0	0	0
432	21.3179	14.0651	14.4123	0	42.3816	109.652	117.686	94.4195	65.9538	43.1134	28.8295	23.7412	28.4141	50.702	107.419	150.899	176.656	198.368	214.947	240.047	243.704	251.354	258.609	255.455	262.916	282.646	282.633	283.115	272.956	251.88	224.355	204.174	185.602	165.087	147.31	134.144	116.88	96.49	76.2365	55.7944	38.7729	26.5671	16.4137	9.8191	4.66057	0	0	0	0
433.07	35.9276	12.2237	12.5732	0	37.8706	108.927	117.565	94.2862	65.2252	42.2589	28.7734	23.6372	27.7652	50.0678	106.566	150.307	175.659	196.384	213.957	238.275	242.782	246.298	255.381	250.978	259.767	280.094	278.793	282.168	268.801	247.936	224.079	205.244	188.164	166.799	149.454	135.787	118.287	97.7967	78.0184	58.0906	41.2135	28.7031	18.0534	11.3581	6.40006	0	0	0	0
434	29.537	17.4134	1.08691	0	29.896	106.846	114.577	93.0805	64.3742	41.2407	28.0817	23.7758	27.0548	49.9213	106.815	149.735	174.373	194.49	212.344	233.338	240.662	243.729	251.238	246.684	257.123	275.543	277.061	279.731	267.993	245.885	221.625	205.981	189.557	168.33	150.088	137.477	119.869	100.502	80.0408	60.7849	43.7766	31.2532	20.5493	13.1125	8.25509	0	0	0	0
435.07	13.3108	16.3606	0	0	17.2936	105.628	113.073	91.6353	63.0512	40.5671	28.0835	23.7287	26.7838	49.2508	107.561	149.269	173.311	194.973	210.072	229.713	237.023	238.694	247.733	243.572	254.07	270.191	275.536	278.551	264.522	246.9	220.588	207.521	189.797	169.405	151.342	139.291	121.693	103.314	82.1626	62.9861	45.6666	33.7	22.651	14.9568	9.82355	0	0	0	0
436	13.2088	14.8381	14.6198	0	9.3633	100.398	111.938	90.6805	63.7925	40.7822	27.6984	23.8461	27.3451	48.4837	107.612	148.124	173.442	194.883	207.044	225.78	233.034	235.23	242.887	241.7	248.903	265.74	272.957	276.725	264.468	246.547	220.145	206.836	190.13	170.277	153.664	141.711	123.104	103.951	84.5897	64.4073	47.7607	35.7548	25.0494	16.5761	11.2399	3.33571	0	0	0
437.07	19.1699	14.9561	23.9472	0	1.15803	98.0808	110.25	91.0726	64.2567	40.623	27.3984	23.7486	27.3289	48.7828	107.109	149.007	173.569	193.189	204.447	223.424	229.907	230.672	240.766	238.439	247.023	264.72	270.458	273.3	261.806	244.813	219.501	206.528	190.571	171.441	154.687	143.837	125.108	105.328	86.2783	66.3685	49.9324	37.2459	26.7115	18.3077	12.3771	6.17331	0	0	0
438	24.307	7.45377	20.6827	0	0	95.274	108.961	89.0518	63.5625	40.4295	26.8641	23.5222	26.9487	49.0059	107.75	148.062	172.02	190.247	204.386	220.755	226.636	227.547	239.672	234.204	245.768	263.614	265.327	270.936	259.597	241.626	219.015	206.451	191.248	172.691	155.852	145.896	127.599	107.393	88.3454	69.0909	52.0932	38.8059	28.3546	19.8817	13.5823	8.1448	0	0	0
439.07	29.9637	12.0778	12.9815	0	0	90.373	106.745	87.4687	61.5512	39.9149	26.8244	23.2948	27.1087	49.5412	106.751	147.674	171.113	189.248	203.341	218.239	222.99	225.376	237.881	231.995	244.129	262.369	263.94	269.231	258.223	239.592	218.77	206.595	192.23	173.641	157.752	146.413	129.871	110.386	90.3629	71.4558	54.4697	40.9927	29.619	21.385	14.9391	9.2633	0	0	0
440	20.9106	12.5105	9.82603	0	0	85.3006	104.923	86.785	59.6744	39.8531	27.0147	23.6474	27.0162	48.898	106.618	147.473	171.685	187.84	200.58	214.972	219.39	222.951	233.62	230.501	238.942	259.417	261.185	267.528	256.86	238.152	219.572	206.586	193.706	174.407	158.92	149.238	132.035	112.362	92.9106	73.7099	57.0568	43.199	31.647	22.9495	16.3019	10.345	0	0	0
441.06	11.5184	22.6736	11.222	0	0	80.1334	102.938	86.8639	58.8814	39.4366	26.971	23.2128	26.8712	48.6268	106.576	148.179	170.984	187.087	198.32	212.681	217.09	220.048	228.338	226.8	234.549	256.246	259.091	262.112	253.833	238.306	218.837	207.424	193.439	174.83	159.586	151.208	133.915	114.503	95.0321	76.1835	59.1559	45.5014	33.4812	24.688	17.3578	11.3464	1.58395	0	0
441.96	11.9402	14.7704	5.40115	0	0	74.9084	103.206	86.0713	60.0256	39.2548	26.9994	22.9143	26.5493	48.2789	106.989	145.979	169.585	186.452	198.24	211.289	215.82	215.971	224.008	220.513	232.154	252.211	254.514	257.272	251.669	237.192	218.57	209.454	193.973	175.474	161.336	153.414	135.836	116.247	97.7129	78.8612	61.0227	47.1144	35.5362	26.2584	18.8174	12.5389	5.15145	0	0
443.03	12.8236	6.41777	8.33048	0	0	64.5058	102.797	84.7767	60.1018	39.8085	27.1097	22.456	26.9954	48.0851	105.383	145.315	169.668	186.821	197.654	210.005	212.248	213.223	221.964	217.471	230.057	249.807	252.25	254.796	250.083	237.735	215.632	209.51	194.976	177.538	164.129	154.177	138.596	118.689	100.034	81.2424	62.8101	49.244	37.017	27.8266	20.3455	13.4906	6.58836	0	0
443.93	5.68629	0	8.38106	0	0	53.0652	100.036	83.8396	58.7055	39.6237	26.573	22.7165	26.66	48.2165	105.476	144.881	171.105	186.529	195.934	208.732	208.771	210.166	220.233	216.4	230.032	247.144	249.908	254.284	247.26	236.282	215.008	208.311	195.229	177.715	165.078	156.3	140.614	121.331	103.469	83.3353	65.2585	51.6864	38.8292	29.4741	21.6723	14.568	7.70273	0	0
445	7.49663	1.68792	15.6812	0	0	37.8668	96.4368	82.2623	58.1141	38.8104	26.2558	22.5586	26.2599	48.4396	106.288	146.624	171.201	186.446	193.477	207.194	205.185	207.127	217.301	214.15	228.256	244.175	248.327	253.519	243.99	234.609	214.991	207.828	195.819	179.384	166.482	157.825	142.506	124.097	106.26	85.8409	67.7214	54.3491	41.1874	31.2368	23.108	15.9085	8.73692	0	0
446.06	16.0537	14.3863	18.9592	0	0	28.7177	94.053	80.1987	58.6873	38.7612	25.5684	22.8995	25.8368	49.4141	106.743	148.236	171.222	187.244	193.658	204.69	202.542	202.813	211.778	211.545	224.367	240.697	245.492	250.53	243.098	232.633	216.19	208.984	198.022	180.55	168.127	159.225	145.277	127.163	108.396	88.3794	70.7264	56.3118	43.5928	33.0371	24.5782	17.0086	9.69366	0.951022	0
446.96	20.3102	23.6051	20.4857	0	0	17.467	91.3645	78.3995	57.4749	39.6573	26.1309	22.6256	25.9646	49.2998	106.702	148.273	170.692	187.853	194.588	203.442	199.899	199.36	209.049	207.512	219.945	239.866	243.553	247.886	242.08	232.499	216.205	209.16	200.398	182.469	170.03	161.716	148.37	129.542	110.066	90.9897	73.3338	58.298	45.5503	34.4959	25.811	17.9081	10.5982	4.18827	0
448.03	23.5459	30.0857	4.32695	1.24902	0	7.47369	86.9786	78.6274	57.4154	39.4443	26.7163	22.2853	26.3129	49.5578	106.081	147.519	170.713	185.608	192.913	201.072	199.775	197.938	207.147	205.667	218.595	237.49	241.204	245.914	239.918	231.747	217.149	207.709	199.514	182.158	171.157	165.245	150.386	131.005	112.109	92.7729	75.4141	60.4017	47.1381	35.7192	26.8804	18.7768	11.2425	5.3608	0
448.93	25.5921	24.8823	2.55536	2.15946	0	0	81.1783	78.5272	56.7663	38.7394	27.1122	21.7672	26.1683	49.1092	105.907	147.818	170.702	185.131	190.071	199.654	198.656	197.741	206.523	204.676	216.841	235.63	238.986	243.781	237.88	229.535	215.102	207.175	198.57	182.991	172.969	167.186	151.966	133.161	114.303	95.1378	77.2607	63.0236	49.3637	37.1495	28.2454	20.0305	12.0361	6.29203	0
450	12.4011	25.9956	8.18915	2.37961	0	0	72.1315	76.316	56.749	38.3529	25.9652	21.4748	26.5544	49.6141	106.326	148.806	171.846	186.17	189.953	197.757	196.034	194.826	202.951	202.606	213.825	231.523	234.918	240.753	235.956	227.862	214.67	207.791	199.432	185.299	174.604	168.133	154.941	135.675	116.587	98.0142	79.8905	65.6248	51.4032	39.236	29.5134	21.1055	12.8769	7.07232	0
451.06	13.374	21.4887	10.4687	8.72138	0	0	56.4726	74.0684	55.5254	38.0233	25.2546	21.5332	26.2278	49.0005	107.346	148.674	172.092	187.562	191.473	197.056	193.668	191.976	200.2	198.517	210.017	228.907	232.666	237.636	235.043	226.471	214.436	209.447	201.367	187.886	176.115	169.532	156.589	138.356	119.651	100.719	82.8585	68.1016	53.4711	41.0353	30.9021	22.0812	13.5927	7.9267	0
451.96	27.9804	20.1166	7.3384	16.3863	0	0	34.4198	74.0697	55.8272	37.4328	25.4554	21.5476	25.8058	49.0836	107.713	149.224	172.002	185.824	191.226	194.612	192.164	189.794	196.884	195.031	207.548	225.298	230.841	236.58	233.085	226.438	216.016	209.043	202.582	187.827	177.59	170.684	157.768	140.883	122.911	103.497	85.5748	69.6318	55.0063	42.6594	32.7925	23.2164	14.1536	8.72263	3.50015
453.03	43.3043	20.4575	11.6906	15.8145	0	0	12.0234	71.8494	54.6234	36.9712	25.5956	21.3646	24.9533	48.5849	106.848	150.49	172.283	185.845	190.255	193.381	190.327	187.573	194.225	193.853	205.786	223.761	228.395	234.593	232.897	225.558	214.064	209.777	202.177	187.7	178.248	172.579	158.292	143.892	125.82	105.805	87.3001	71.6132	56.7959	44.07	34.241	24.5689	14.9618	9.3285	4.50519
453.93	35.5351	24.7419	8.96582	20.4664	0	0	0	68.0909	53.3608	36.7086	25.6053	21.4211	25.3055	48.5038	106.881	150.782	173.186	186.428	188.866	191.418	187.814	184.668	190.562	192.625	204.7	221.227	225.752	233.572	231.698	224.115	213.311	210.23	201.885	187.889	179.354	175.143	160.544	145.91	128.041	108.059	89.776	74.0224	58.6687	45.8754	35.2983	25.4967	16.0592	9.88227	5.31862
455	27.5585	19.7052	7.70896	25.0854	0	0	0	59.6605	52.207	36.1835	24.6723	21.7339	25.4232	48.3747	107.947	151.091	173.089	187.083	188.219	191.254	185.668	182.096	188.646	189.085	202.254	219.678	223.48	232.19	231.329	222.691	212.682	209.698	202.851	188.986	180.17	178.175	163.56	146.968	129.711	110.592	92.5073	76.35	60.9888	47.4989	36.6315	26.3489	17.1342	10.6412	6.05259
456.06	28.6381	16.8097	11.1761	18.5394	0	0	0	47.1621	52.1276	35.8777	23.9069	21.2948	25.9866	48.8358	109.428	150.747	174.085	185.71	188.322	190.853	184.092	179.669	188.367	185.227	198.548	217.043	222.331	231.684	227.583	221.681	212.794	207.387	204.132	190.495	182.149	178.975	166.754	149.008	132.157	113.105	94.6281	78.5599	62.6963	49.3089	38.0286	27.4069	17.991	11.3429	6.78393
456.96	20.089	15.1386	15.4578	5.83016	0	0	0	27.306	52.1069	35.6173	23.7803	21.1625	26.0543	48.6878	109.933	152.568	175.769	186.651	188.726	189.859	182.65	176.682	186.528	182.694	195.259	214.43	219.637	228.817	225.814	220.425	211.726	206.616	205.555	191.889	182.161	179.981	168.198	151.418	135.019	115.753	95.9963	80.7108	64.0585	50.518	39.2444	28.7658	18.6569	11.8276	7.17052
458.03	9.80363	16.2439	8.87768	6.2398	0	0	0	7.2029	51.2757	35.6292	24.0471	21.1785	25.9993	48.1727	110.083	153.221	175.276	186.829	187.679	187.895	180.973	174.847	182.055	181.704	194.216	211.638	218.75	224.73	223.926	219.088	211.535	207.552	206.066	191.661	182.574	179.62	168.98	154.481	137.329	117.384	98.2314	83.0353	65.5998	52.0383	40.1434	29.3584	19.0988	12.177	7.49429
458.93	3.75679	14.3397	10.6016	12.2139	0	0	0	0	50.1997	35.7896	23.9861	21.5157	25.135	48.6998	110.254	152.425	173.997	186.726	185.821	186.346	179.469	172.734	178.288	179.524	191.608	210.99	214.17	221.821	221.685	216.751	210.924	207.829	205.343	191.714	182.595	179.677	169.365	155.947	138.929	119.311	100.792	84.3161	67.2391	53.4	41.5884	30.1273	19.6443	12.9206	7.98384
460	20.4498	13.745	10.6351	14.8915	0	0	0	0	49.3663	35.4805	24.006	20.881	25.0457	48.9423	108.975	150.461	173.146	185.254	185.447	184.865	177.153	170.202	176.372	177.605	188.464	208.994	212.175	219.489	218.797	214.585	209.944	207.225	202.522	193.354	184.659	182.386	171.819	157.761	139.986	120.973	102.882	85.8679	68.7899	54.833	42.9071	30.987	20.1537	13.5676	8.62117
461.06	20.2663	7.17084	4.47096	9.75982	18.2918	0	0	0	48.8893	34.9131	23.7805	20.9525	25.0238	48.9452	107.971	150.518	174.629	186.417	185.357	184.137	173.868	167.827	173.625	174.997	185.088	205.217	207.879	216.262	215.922	213.837	207.8	205.956	201.505	193.719	186.04	185.189	173.968	158.483	142.203	124.557	104.295	87.5626	70.2302	56.0446	43.9702	32.2015	21.0753	14.1785	9.20564
461.96	17.918	5.05782	3.35453	7.43911	24.029	0	0	0	46.7706	33.5982	23.3378	20.926	25.2663	48.9992	108.437	152.115	174.054	185.669	184.26	182.306	171.118	164.816	171.059	172.218	182.252	201.196	206.974	212.096	214.202	213.116	205.673	205.289	202.006	193.346	186.676	186.137	175.724	160.62	145.018	126.48	106.079	89.7926	72.0868	57.7423	44.9615	33.065	22.0273	14.7301	9.54452
463.03	7.79355	11.1841	10.8692	6.76756	28.9451	0	0	0	45.3105	33.2144	22.9472	20.9515	25.132	48.7523	109.033	152.478	174.09	185.876	182.794	179.693	170.164	162.082	168.3	170.791	179.441	198.788	203.056	210.234	211.28	211.074	204.68	203.864	202.769	193.117	186.085	185.207	175.88	161.923	147.329	128.099	107.486	91.064	73.7064	59.0044	45.8909	33.9631	22.7526	15.4222	9.91821
463.93	12.1865	16.666	17.3292	9.71062	33.0058	0	0	0	42.9017	33.2974	23.0247	20.5216	25.582	48.325	108.061	152.154	172.247	184.892	182.455	178.401	168.435	160.996	165.768	168.146	177.935	195.49	201.841	208.114	210.353	208.489	203.906	203.68	201.459	192.64	186.033	185.747	177.278	163.306	148.215	129.47	109.419	92.6664	75.1375	59.6607	47.2895	34.5986	23.1405	15.7512	10.2962
465	20.7132	15.0357	14.4113	9.76995	37.0517	0	0	0	38.4615	32.8092	23.0287	20.2958	24.8465	47.9659	107.123	150.334	172.909	185.299	182.2	177.6	165.862	159.548	162.963	164.686	175.28	191.437	197.616	206.194	208.856	208.334	202.357	203.46	200.411	191.592	185.634	185.368	178.082	163.886	149.314	131.375	110.561	94.3779	76.4346	60.7703	48.1689	35.1934	23.6156	16.1064	10.9232
466.06	29.6935	18.6724	21.2688	11.4824	36.6459	16.5109	0	0	30.5635	32.5358	23.0365	19.6115	24.5437	48.2893	107.459	150.321	172.94	184.326	181.867	175.694	162.553	156.059	161.115	160.472	171.393	189.442	195.278	203.337	205.781	205.151	199.999	202.021	200.107	191.168	185.872	185.318	178.553	164.296	150.55	132.164	111.981	95.5665	77.2433	62.2948	49.1067	35.6676	24.1945	16.5089	11.2778
466.96	29.7262	21.1146	23.37	10.6043	31.2144	33.3464	0	0	22.2668	31.6436	22.3228	19.3717	24.2759	48.017	107.662	151.174	173.013	184.086	181.391	173.221	160.602	152.881	158.559	157.625	169.302	186.867	191.9	200.798	202.212	201.501	198.567	200.027	200.329	192.131	186.17	186.092	179.226	164.836	151.06	133.353	112.955	95.8846	78.2961	63.3671	49.6229	36.3685	24.8626	17.2639	11.674
468.03	34.3684	24.5266	20.872	9.3035	32.1586	44.3917	0	0	13.0075	30.7816	21.7793	19.4737	24.1334	47.7037	107.422	151.642	172.656	183.759	178.752	171.57	159.286	151.519	155.724	155.547	167.743	184.943	189.645	197.609	200.512	198.369	195.887	198.804	198.425	190.643	186.437	187.717	179.183	164.975	151.494	134.409	114.196	96.779	78.8657	63.4935	50.4016	37.2859	25.527	17.7002	11.8847
468.93	40.0759	24.7373	12.5372	10.6978	34.8062	51.2459	0	0	1.26564	29.9453	21.626	19.7429	23.2144	47.448	107.11	150.324	172.549	183.533	177.124	170.022	158.266	149.615	153.292	153.743	165.365	182.245	186.29	195.25	199.657	198.843	193.758	197.948	196.247	188.271	185.141	188.456	179.443	166.12	152.842	134.918	115.36	98.3619	79.8398	64.1161	50.8558	38.1966	25.989	18.0418	12.3023
470	31.5545	28.0071	9.1682	12.829	35.4933	58.7038	0	0	0	29.8431	21.4421	18.7052	23.0145	47.1243	106.868	148.232	171.825	181.73	175.556	168.534	154.941	146.269	150.031	151.521	161.661	178.794	182.89	192.602	197.153	196.315	192.946	196.182	195.125	185.984	184.415	187.334	178.331	167.149	153.877	135.589	116.565	100.004	80.5593	65.0883	51.4807	39.0108	26.1516	18.3961	12.6469
471.06	19.8414	29.9498	14.2304	16.4675	34.4252	60.4916	0	0	0	29.0763	21.1743	18.8084	23.1372	46.7381	106.088	147.279	170.354	179.709	175.672	167.223	151.924	142.606	146.925	148.583	159.854	175.079	179.201	191.066	192.319	192.392	191.514	195.165	194.569	186.549	182.961	186.107	178.203	168.486	153.756	136.557	117.58	100.792	81.6874	65.9611	52.2488	39.389	26.4534	18.8927	13.0763
471.96	16.2228	30.397	24.3086	20.1997	31.5114	60.7511	0	0	0	27.7943	21.159	19.0991	22.724	46.7922	105.19	147.676	168.97	179.35	173.6	164.473	150.053	140.281	144.845	145.829	157.027	172.69	177.358	189.776	188.645	188.941	188.976	192.932	193.273	186.549	182.648	185.68	177.539	168.022	153.903	136.428	118.692	101.111	82.7175	66.2283	52.7998	39.4991	26.8783	19.0283	13.3991
473.03	16.1325	35.5852	22.3944	23.4109	32.9896	60.8075	0	0	0	26.2415	20.9739	18.9236	22.268	46.9587	104.733	148.265	169.112	179.789	172.641	162.507	148.749	138.94	142.43	142.888	153.937	170.764	177.17	187.741	185.996	188.386	186.606	190.799	192.179	185.441	182.674	185.81	177.71	167.378	154.008	136.974	119.314	101.322	83.0787	67.038	53.1163	39.8356	27.0299	19.0739	13.6923
473.93	13.643	30.7651	20.9081	20.1698	33.4257	60.1625	0	0	0	24.0539	20.3742	18.0118	21.911	46.0226	104.542	147.741	168.165	179.213	171.375	161.653	145.995	137.154	139.217	141.464	151.699	167.435	175.23	182.912	185.32	187.468	185.243	188.16	190.959	182.022	182.334	184.317	177.184	166.964	155.056	137.614	119.659	101.598	82.9323	67.7497	53.8418	40.472	27.3683	19.3412	13.9187
475	21.5076	26.8419	24.46	15.0397	34.5333	57.6641	15.8446	0	0	20.6197	20.2435	17.8138	21.7471	45.4026	103.276	146.42	167.095	177.964	171.202	159.936	144.11	133.924	135.495	139.126	150.219	164.817	171.637	178.793	181.905	184.671	182.743	186.936	189.016	180.907	180.665	182.436	176.735	167.984	156.103	138.153	118.889	101.836	82.7068	67.6494	54.486	40.8757	27.7938	19.7554	14.148
476.06	20.6892	22.9569	27.5128	7.54591	28.8961	55.8728	27.8206	0	0	16.4417	19.9493	17.4223	21.2814	45.5951	101.72	144.837	164.895	175.922	169.721	157.11	142.127	131.056	134.27	136.138	146.22	162.699	167.382	175.523	179.327	182.038	180.037	184.81	185.946	180.678	179.355	181.373	176.77	168.016	155.89	137.989	118.709	102.138	83.4197	67.8017	54.65	40.8264	28.2579	20.1941	14.4205
476.96	31.5659	25.7993	21.587	6.25941	27.2302	56.9131	35.624	0	0	10.4572	19.2098	16.8544	21.6329	45.3947	101.999	142.962	165.37	174.924	166.714	155.601	140.55	129.971	133.399	133.236	142.901	159.495	163.199	173.301	176.84	178.916	177.986	182.646	184.778	180.292	178.887	181.918	176.296	166.901	153.895	137.999	118.68	103.132	83.9524	68.3299	54.7562	40.8939	28.2874	20.5556	14.5386
478.03	21.5178	21.0331	19.5164	9.56253	29.1307	56.6455	44.2812	0	0	3.53412	18.2535	16.0779	21.8296	44.1337	102.323	142.721	164.659	172.323	164.703	155.588	138.75	127.963	131.378	131.868	141.867	156.02	160.55	169.67	173.544	176.235	176.294	180.307	183.778	178.197	177.317	181.058	175.049	165.831	152.498	137.559	119.652	104.296	84.5059	68.4834	55.1439	41.2877	28.6785	20.6466	14.7424
478.93	19.942	20.8205	16.5099	6.30655	26.1825	53.6771	50.3144	0	0	0	17.5186	16.0386	21.8442	43.4664	101.408	142.006	163.251	170.702	163.362	153.446	137.171	124.832	128.23	129.356	140.526	152.421	159.435	167.22	169.91	172.656	174.304	178.971	181.97	176.181	176.064	180.101	174.486	165.523	152.991	136.934	120.09	104.974	84.2546	68.4816	55.4759	41.6079	28.8059	20.8248	14.9099
480	10.7487	17.5383	10.9103	5.73892	23.014	50.4978	53.5428	0	0	0	16.0377	15.9977	20.8093	43.157	99.369	141.251	160.795	169.228	162.448	149.953	134.312	122.028	124.494	126.248	136.792	149.741	157.154	163.851	167.366	170.132	171.749	177.674	179.332	173.062	174.414	178.271	173.199	164.991	153.234	137.505	119.827	103.627	84.4571	68.678	55.5512	41.7143	28.8569	20.9116	15.0089
481.06	19.0537	13.9452	1.95507	11.334	21.6236	48.3971	53.3484	0	0	0	14.0734	15.6651	20.2645	42.2911	97.9077	139.549	160.038	168.075	160.272	147.744	131.724	119.675	122.318	123.324	133.857	147.414	153.244	161.722	165.557	166.275	170.328	174.466	176.988	170.075	172.562	176.93	172.126	163.855	152.973	138.084	119.332	103.328	84.7601	69.0967	55.6568	41.7211	29.0436	21.1634	15.0486
481.96	14.2474	14.4627	0	15.9241	25.2488	49.5105	52.7953	0	0	0	11.8546	14.8529	20.0307	41.3572	97.0421	138.875	158.786	166.388	158.345	146.444	130.202	118.296	120.149	121.57	130.521	145.549	151.166	159.556	162.486	163.88	167.533	171.926	174.39	169.734	170.354	175.181	171.106	163.884	151.901	138.23	118.768	103.628	85.1909	68.8775	55.8996	41.7919	29.4203	21.0913	15.3428
483.03	5.01992	14.0246	0	2.31662	24.2556	48.7679	52.8469	0	0	0	9.31373	14.5042	19.8681	40.9166	96.3333	137.182	158.087	164.967	156.993	145.538	128.496	116.38	118.589	120.034	128.006	143.556	149.061	158.605	160.419	162.992	164.115	169.262	172.669	169.376	169.414	173.931	171.334	162.405	151.547	137.382	119.003	103.739	85.0534	69.1687	55.8987	41.826	29.3473	21.3498	15.5004
483.93	0.355155	2.82889	10.134	0	21.8121	47.3447	51.453	0	0	0	2.60319	14.1725	19.326	40.2576	95.169	135.995	156.032	163.65	155.802	143.248	125.664	114.45	116.147	117.466	126.057	140.48	145.614	155.306	157.295	161.791	160.948	167.402	171.728	167.522	168.114	172.584	170.483	160.618	150.6	136.607	117.847	102.734	84.8726	68.8113	55.7351	41.8992	29.3231	21.3892	15.5562
485	0	0	11.4976	5.14628	20.0671	45.5432	49.5291	0	0	0	0	13.8711	18.6705	40.2113	93.8926	134.748	154.367	161.087	153.196	141.522	122.59	110.763	113.592	115.113	124.972	137.385	141.76	151.681	153.449	157.897	159.619	164.802	169.616	163.901	167.156	171.553	168.375	159.228	150.019	135.557	117.265	102.63	84.2829	68.6526	55.0391	42.22	29.6675	21.4982	15.6696
486.06	9.70464	2.31481	12.4862	12.0419	19.0797	43.9196	47.4682	0	0	0	0	13.3351	18.2499	39.8608	93.1705	133.443	152.845	159.939	151.237	138.757	120.496	109.047	111.226	112.805	122.395	133.89	138.911	147.682	151.408	154.694	157.783	163.303	166.872	161.885	165.259	170.78	165.729	158.754	148.979	135.329	117.316	102.26	83.8495	67.8663	55.2345	42.2805	29.8506	21.6882	15.9282
486.96	5.58209	0	4.72626	2.03731	20.0793	43.3865	48.1755	0	0	0	0	12.7505	17.7684	39.2826	91.8252	130.921	152.312	158.632	149.672	137.089	119.744	106.455	108.953	110.023	119.567	130.563	136.415	145.154	149.745	152.579	155.448	161.143	165.778	160.488	162.765	169.172	163.951	156.765	148.697	134.486	117.986	101.409	83.3876	67.9387	55.2579	42.2899	29.7662	21.6511	16.0631
488.03	0	1.2236	4.23607	0	17.8489	42.1455	48.5235	0	0	0	0	12.7167	17.371	38.7008	90.7008	129.701	149.34	156.638	149.163	135.338	117.814	105.535	107.822	107.678	117.283	128.681	135.222	143.637	147.123	150.19	152.44	158.266	163.604	158.41	160.741	166.546	162.804	155.348	147.383	133.405	117.267	100.966	83.6181	67.9615	55.2333	42.0617	29.5272	21.7223	16.0421
488.93	0	2.01909	0	2.03787	16.7286	41.2505	47.0103	13.6472	0	0	0	12.4023	17.263	38.6751	90.5073	129.112	147.084	153.949	146.324	133.647	115.445	104.224	105.782	106.051	115.401	127.52	132.806	140.461	143.748	148.04	150.509	156.385	161.484	157.11	159.947	164.63	161.673	154.921	145.718	132.042	116.191	101.209	82.8874	68.3595	54.7137	41.9483	29.4868	21.7532	16.0467
490	1.68406	8.25949	1.56601	10.0003	17.2861	39.0302	44.7783	25.4814	0	0	0	11.6342	16.5312	38.1974	89.9659	127.762	145.758	151.51	144.7	131.174	112.706	102.484	103.556	103.644	113.238	125.178	129.566	136.681	141.97	145.565	148.462	154.285	158.939	155.742	157.713	162.909	159.686	152.855	144.231	131.525	115.045	100.837	82.9753	68.9156	54.6275	41.5415	29.388	21.9079	16.1001
491.06	14.3064	6.97469	5.60608	6.17293	17.9166	37.0219	42.0495	30.4069	0	0	0	9.73066	16.9548	37.2497	88.1522	125.652	145.076	150.518	142.946	129.324	111.626	99.545	101.078	101.419	111.234	122.166	126.041	133.638	139.085	143.217	145.532	151.593	156.153	153.325	154.949	161.126	157.548	150.5	143.161	130.367	114.101	100.399	82.3972	68.6642	54.2011	41.3356	29.4079	21.8721	16.2723
491.96	1.18149	19.3412	7.47475	0	15.5777	34.6764	40.9585	33.1549	0	0	0	5.36511	16.4246	36.7044	85.8386	124.929	142.033	149.522	140.441	127.003	109.939	97.033	99.5197	99.9771	107.862	119.404	124.447	131.122	136.169	138.767	142.322	149.095	152.316	149.76	152.14	159.636	156.013	149.215	142.513	129.739	113.258	99.6606	81.9735	67.4311	53.6396	41.2095	29.4926	22.028	16.3593
493.03	2.53206	6.90772	9.90551	0	12.99	33.2022	38.4821	34.4448	0	0	0	0	15.4624	35.646	85.494	123.287	139.831	148.544	138.364	124.587	108.633	95.4532	97.5809	98.4675	105.585	117.213	121.642	129.54	133.837	136.148	139.507	147.375	149.546	147.949	149.673	158.046	154.606	149.699	140.69	128.354	112.507	98.5837	81.0231	66.2174	53.4895	41.2207	29.3884	22.083	16.4501
493.93	0	1.9389	8.10568	4.35441	14.5376	31.5141	37.8327	34.3055	0	0	0	0	14.3559	35.0417	85.0332	120.343	138.914	146.23	137.007	122.62	105.716	93.9937	95.3154	96.1716	103.764	114.86	119.343	127.937	132.275	134.715	137.412	145.969	148.463	146.409	147.973	154.824	153.311	147.864	139.213	127.47	111.703	97.4046	80.9624	66.4162	53.7356	40.9821	29.1816	21.9337	16.444
495	0	0	5.93361	1.04924	16.0987	29.7021	36.2528	31.5652	0	0	0	0	15.0082	34.2942	83.6822	118.218	137.628	142.643	134.915	121.721	103.625	93.2605	93.36	93.7903	103.157	112.6	116.547	126.05	129.542	133.295	135.16	143.358	146.963	144.08	148.036	152.681	151.23	145.481	137.016	125.924	110.561	96.5023	80.0312	65.8232	53.8963	40.7176	28.8873	21.7105	16.4911
496.06	4.49719	3.62567	6.83331	0	13.0329	30.6418	34.7639	31.209	0	0	0	0	14.704	34.0385	81.0808	116.473	135.455	139.771	131.838	118.865	101.079	90.8214	90.7821	91.507	99.6027	110.532	115.65	122.821	126.875	130.432	133.938	140.767	144.526	142.24	146.51	151.153	149.913	144.098	135.801	124.819	109.496	95.971	79.1944	65.3917	53.5124	40.4842	28.6463	21.6085	16.434
496.96	5.72371	3.03695	5.21407	0	11.2186	30.195	32.5369	30.475	0	0	0	0	13.7981	33.5285	79.8641	114.632	133.046	138.636	130.213	117.098	100.102	88.2487	88.6376	90.3884	98.1071	107.349	114.166	120.586	123.739	128.314	131.037	137.698	141.236	140.552	143.328	149.556	147.959	142.765	134.616	123.63	108.252	94.5868	78.7537	64.5566	52.6092	40.3974	28.7493	21.6722	16.4924
498.03	1.37187	5.85795	2.30597	5.62539	12.8867	29.537	31.0573	29.6464	0	0	0	0	13.2047	33.2199	79.2635	112.443	132.015	137.921	128.84	115.425	98.4338	86.569	86.7478	89.3687	96.5478	105.288	112.135	117.107	120.871	126.299	127.994	135.277	138.968	137.62	140.26	147.788	146.056	140.743	133.372	122.32	106.897	94.3581	78.6737	64.0346	52.2959	40.0247	28.7759	21.7423	16.5359
498.93	6.22902	12.4714	5.74532	6.32891	16.1706	28.0586	30.5858	28.3535	0	0	0	0	13.1861	32.1653	78.1888	111.634	129.748	135.96	126.537	113.948	97.3824	84.5414	84.9517	86.9805	94.9054	103.6	108.205	114.714	118.22	122.932	125.054	132.974	136.975	134.92	138.192	145.848	144.092	138.602	131.918	121.098	105.888	93.1749	77.8051	63.5842	52.2727	39.5877	28.5851	21.5789	16.5203
500	16.6882	13.2932	10.6415	5.79041	18.2376	27.8012	31.0975	29.2183	5.95132	0	0	0	13.079	31.6391	77.1089	111.078	128.193	133.78	123.942	111.805	95.1484	82.3939	82.6054	84.6139	92.6828	103.087	105.506	113.051	116.17	119.623	123.721	130.907	134.845	133.544	136.217	142.837	142.079	136.824	130.449	120.1	105.085	91.9735	76.9142	63.7892	52.2273	39.2544	27.9002	21.3088	16.2242
501.04	16.2611	7.40926	7.39893	5.49592	20.1379	28.1433	31.5375	29.7792	14.4359	0	0	0	12.1723	31.5266	75.9996	109.066	126.676	131.614	120.951	110.762	92.8901	80.8783	81.4023	83.2066	91.1282	100.314	103.642	110.705	113.992	118.59	121.667	128.602	132.785	133.196	134.514	139.586	139.764	135.07	128.388	119.194	104.102	90.96	76.0692	63.2187	51.3783	39.0235	27.6406	21.2393	16.2059
501.94	13.6024	5.61894	8.62883	4.11171	20.5869	29.2048	30.8925	28.2591	17.6716	0	0	0	9.8015	30.934	74.5753	106.059	124.659	128.544	119.008	109.709	90.9952	79.4968	80.4163	80.9951	88.8588	97.6814	101.574	107.443	112.423	117.021	119.497	125.809	130.931	130.951	132.081	138.415	137.612	132.956	126.395	116.855	102.606	90.5517	74.7791	62.0197	50.7289	38.884	27.6017	20.9752	16.3587
502.98	16.6942	10.1923	16.1087	5.89081	14.8856	29.4542	29.3736	26.6854	17.883	0	0	0	6.46513	30.0514	73.2987	104.055	121.681	126.709	118.387	106.818	89.7129	78.1977	78.9437	78.2103	85.1743	94.9315	98.7195	105.158	109.604	114.319	116.436	124.195	128.488	128.42	131.001	136.603	135.636	130.896	124.817	114.178	102.097	89.2748	73.6192	61.1896	50.198	38.6805	27.6248	20.9066	16.4297
504.02	14.5512	9.15966	16.1103	8.09569	15.4824	27.7933	29.343	26.2203	18.2025	0	0	0	1.17962	28.8059	71.9053	103.201	118.095	124.944	117.425	104.056	88.1074	76.5005	76.8635	76.7887	83.8651	92.7772	96.4468	102.612	107.51	111.752	113.404	121.721	125.754	124.989	129.211	133.477	133.647	128.776	122.969	112.548	100.81	87.8656	72.2644	60.7935	49.7775	38.1343	27.3795	20.7947	16.2678
505.07	19.6283	2.34314	11.5891	4.59246	16.8821	29.2015	29.9037	26.6275	18.3912	0	0	0	0	28.2716	70.2635	101.5	116.263	123.486	115.229	101.387	86.2686	75.4591	74.6778	76.7095	82.6828	90.449	94.3949	100.906	104.891	110.156	111.438	119.438	123.747	122.559	126.384	130.48	131.725	126.846	120.709	111.646	99.2577	86.5806	72.006	60.0742	49.1002	37.8156	27.0213	20.8073	16.1341
505.97	8.56519	6.11746	4.14686	0	18.4112	29.8951	31.1805	25.4052	18.2112	0	0	0	0	27.4382	68.5982	99.6917	115.356	120.906	112.214	99.8231	84.175	73.4308	73.4214	75.3334	81.0667	88.9565	93.6302	99.6029	103.573	108.249	109.946	116.605	121.385	120.68	123.012	128.96	130.234	125.34	119.342	110.501	97.1735	85.5353	71.3366	59.1462	48.6747	37.5649	26.6862	20.4706	16.2067
507.01	6.98961	10.3497	5.61077	9.09703	15.6965	30.8326	31.1627	23.5441	18.5951	0	0	0	0	26.7616	67.439	97.8023	113.844	118.999	110.752	97.2565	83.3521	72.1459	72.1336	73.0326	78.2124	87.7124	91.678	98.016	100.963	105.052	107.973	114.675	118.882	118.809	121.034	127.367	127.294	123.223	117.662	108.572	95.5024	84.6966	70.7684	58.4296	48.4116	37.3637	26.4059	20.357	16.2099
508.05	0	12.1511	10.9728	14.5214	15.3215	29.9077	29.7118	22.6184	18.6906	0	0	0	0	25.8954	66.2561	96.2085	112.356	117.488	108.838	95.1813	81.7623	70.0163	70.512	70.5299	77.1661	85.8176	89.5291	94.39	98.9851	102.437	105.114	112.072	116.009	117.243	118.919	125.199	124.783	121.223	115.796	106.619	93.5158	83.8849	69.5263	57.8274	47.8981	36.6606	26.338	20.184	16.0339
508.95	8.41094	12.6928	9.21716	9.63924	15.2244	28.8824	27.4523	20.8622	17.476	0	0	0	0	25.4887	65.0016	94.6461	111.04	114.811	106.89	93.4088	80.1068	68.5291	68.6286	69.1316	75.5242	83.5818	86.7293	92.6364	95.2988	99.8978	103.42	110.191	114.525	113.836	116.721	122.333	122.374	119.285	113.763	105.071	92.2799	81.9922	68.5247	57.0737	47.0158	36.386	26.2848	20.04	15.671
510	1.9106	16.8203	2.93537	3.45914	15.428	28.0611	27.1893	20.7284	16.7161	4.83517	0	0	0	25.1314	63.6447	92.3134	109.688	111.798	103.967	92.8592	77.1994	67.2512	67.212	68.2785	74.4349	81.6436	85.501	91.132	92.9808	97.837	101.208	107.496	112.566	111.675	114.803	120.301	120.32	117.818	112.1	103.313	91.1239	79.9709	67.3281	56.1631	46.4804	35.8171	25.9923	19.657	15.508
511.06	10.1591	6.17963	5.90062	8.1917	15.7625	26.563	25.8078	20.078	16.7949	8.13572	0	0	0	24.1544	62.4077	90.0874	106.449	109.818	102.361	91.1308	75.4387	65.7697	65.7659	67.0747	73.2789	80.1058	83.3942	89.4675	92.1982	96.0421	98.869	105.094	110.499	109.179	112.559	117.806	118.113	116.043	110.306	101.631	90.4686	79.066	66.3835	55.3218	46.0128	35.5691	25.6252	19.4322	15.4227
511.96	15.8663	7.61911	5.25312	9.19689	15.502	25.3998	24.7344	20.8301	16.615	9.64409	0	0	0	22.4288	61.2589	88.5264	103.37	108.21	100.433	88.9837	73.9386	64.0736	64.2544	64.8891	71.8256	78.8207	81.4037	86.5961	90.6119	94.0639	96.5379	103.53	107.625	107.967	110.614	116.751	116.667	113.277	108.854	100.521	88.8918	78.0809	66.0429	54.7968	45.3591	35.2602	25.4081	19.4152	15.3302
513.03	12.8195	15.3342	2.73757	6.3465	16.362	23.8955	24.2458	19.4657	14.6582	9.76524	0	0	0	19.5287	60.1564	88.0033	101.45	105.571	99.1602	87.7328	72.889	63.4512	63.0639	63.0206	69.1876	76.8153	79.3714	85.0828	88.6043	92.9809	95.2213	101.765	105.677	105.202	109.291	114.346	114.83	111.327	107.419	99.1606	87.6219	76.9438	65.2042	53.8166	44.3057	34.697	25.2589	19.3178	15.0935
513.93	1.9517	21.9745	0.228838	0.778244	12.6828	23.9754	26.006	18.8485	13.6792	9.30488	0	0	0	15.841	58.7798	86.2443	100.257	103.519	96.1575	86.2095	71.754	62.54	61.8883	61.4679	66.8442	75.1847	77.2136	83.0462	86.2068	91.5298	92.9722	99.2234	104.476	103.571	106.908	113.057	112.283	108.928	105.53	97.0856	85.7228	75.6895	64.4787	53.2003	43.4781	34.1926	25.0043	19.3099	14.9154
515	1.97839	13.6221	5.48318	0.485003	11.4967	23.813	24.7652	17.5146	12.7907	9.29349	0	0	0	9.12525	56.891	84.3296	98.2905	102.023	93.5843	83.9258	70.3534	60.6082	60.2012	60.0902	65.4291	73.3426	75.0192	80.538	84.314	89.1157	91.2081	96.9831	102.442	101.999	104.406	110.136	109.829	107.427	103.623	94.4487	84.5066	74.7774	62.9	52.402	43.0261	33.7481	24.7522	19.2056	14.7768
516.06	4.55427	4.75409	6.39535	2.42809	10.0006	22.8854	23.8675	17.5139	12.38	9.21811	0	0	0	0	55.6056	82.2112	95.5656	99.8343	92.0425	82.5073	68.3657	58.9131	58.509	59.1401	63.7265	71.757	73.4207	78.0847	82.0768	86.0785	88.5288	95.4105	99.981	100.399	101.702	107.556	107.825	104.86	101.371	92.1172	83.1005	73.6122	61.578	51.5186	42.7578	33.5395	24.4245	19.2873	14.6292
516.96	3.12818	2.15507	4.38859	4.95666	12.4315	21.4409	22.8662	16.6475	11.6876	8.35686	0	0	0	0	54.2654	80.4253	94.0643	97.8434	91.2206	81.8553	66.7724	57.7315	56.7716	58.2771	62.4728	69.2125	72.2313	77.5124	80.8161	84.2196	87.0565	93.461	97.441	97.8579	99.8096	104.425	106.304	103.47	99.5854	91.0111	82.1855	72.2891	59.7126	50.3424	42.1257	32.9393	24.1428	18.8806	14.5848
518.03	8.64031	7.43293	3.11325	2.22557	8.6707	21.2232	21.5711	16.5915	11.4283	7.51154	0	0	0	0	53.4174	78.7824	92.3943	96.4957	89.3147	79.5758	65.5337	56.5933	55.639	56.9181	61.5446	67.4201	70.5024	75.7187	78.6757	82.7745	85.4105	91.3438	95.6125	94.9573	97.8123	103.28	104.615	101.621	97.9865	90.5368	80.5673	71.4604	59.2894	49.5719	41.4684	32.3574	23.9169	18.5814	14.6261
518.93	21.3885	8.38599	0.141226	0	6.1728	20.4749	20.3106	16.3596	10.3363	6.8649	0	0	0	0	51.6232	77.1383	90.135	94.5399	87.4513	77.1301	64.5446	54.9478	54.7846	55.5945	60.2478	65.9699	68.8842	73.6729	76.5624	80.6475	84.2082	89.3827	93.8706	93.0344	96.3544	101.496	102.474	99.6804	96.1342	89.3223	78.9419	69.9235	58.7612	48.8827	40.8548	31.9883	23.6985	18.1892	14.5997
520	15.3983	1.61162	3.21115	0.0230033	5.31929	18.9558	20.0153	15.5019	9.5283	6.79075	0	0	0	0	49.5819	75.2033	86.8265	91.6853	84.9539	75.7548	62.8394	53.6312	53.4909	54.2288	58.4009	64.1002	67.3329	71.5665	75.5948	78.7579	81.7148	87.2186	91.6756	91.4887	94.2499	99.0559	100.58	97.5033	94.106	87.2841	77.7468	68.3101	58.0055	48.3116	40.3402	31.5734	23.278	18.0088	14.3569
521.04	6.1389	0	0	6.61161	7.33428	18.854	19.6872	13.77	9.06923	6.14266	0	0	0	0	46.9595	73.7975	85.157	89.1373	83.2989	74.0996	61.9857	52.0821	52.0274	52.7663	56.7905	61.9387	66.1326	70.7779	74.1074	77.6796	79.8022	85.6131	89.1539	89.8864	92.4485	96.6436	97.9396	96.0997	92.1144	85.3367	75.8052	66.4795	56.431	47.7345	39.4943	30.9965	22.8386	17.8364	14.0524
521.94	0	0	0	1.63354	5.15014	19.3963	19.4775	13.1683	8.06042	6.56619	0	0	0	0	44.1968	72.2728	83.5011	87.6631	81.645	71.6385	60.4942	50.6303	50.3821	51.8686	55.8941	61.1078	64.4958	68.6871	71.6809	76.196	77.877	84.2054	87.0656	87.1899	90.6761	94.6568	95.8487	94.1362	90.8669	83.6756	73.8695	65.3794	55.5624	46.6503	38.8537	30.1839	22.4974	17.7576	13.8471
522.98	1.20119	0	0	0	3.598	18.869	19.9131	14.0846	7.47706	6.60625	0.58915	0	0	0	41.7352	70.8768	82.0904	86.4905	80.8947	70.4858	58.8293	49.6531	49.3014	50.8354	55.0285	60.293	63.2548	67.4246	69.7374	74.395	75.8034	83.0486	85.212	85.1359	89.1952	92.9877	93.7854	91.5047	88.8756	82.2415	72.3143	64.2853	54.6813	45.6137	38.5864	29.8665	22.1565	17.5162	13.7542
524.02	1.38179	0	2.91883	0	5.26368	17.4851	19.3365	14.6216	7.4243	6.04878	2.12096	0	0	0	37.6853	68.7541	79.8318	84.6981	78.5846	69.2747	56.787	48.8326	48.1221	49.6241	53.7736	58.5719	61.7777	65.957	68.7721	72.8188	74.1057	80.7828	83.4548	83.543	87.2385	91.3864	92.2942	89.0948	86.88	80.3229	71.5342	63.2252	53.8108	45.2007	38.1243	29.4103	21.7775	17.3274	13.8145
525.07	0	0	0.0896988	0.20152	9.61052	17.3008	18.4841	13.6475	7.87725	5.27055	3.35438	0	0	0	32.6002	67.5399	78.1112	83.299	76.7241	67.3852	55.7836	48.0464	47.4705	48.4384	52.5269	56.4777	60.3825	65.0008	67.5715	71.0064	72.9448	78.4733	81.544	82.3271	85.1769	90.3106	90.0272	87.4704	84.3413	78.387	69.9948	62.0877	52.5891	44.551	37.2862	29.0258	21.4734	17.0613	13.7038
525.97	0	0	0	1.30899	10.0286	16.8762	17.6265	11.9509	6.58239	4.4619	3.94559	0	0	0	25.4486	66.2452	76.8687	81.5555	74.3128	64.7864	54.5943	46.4386	46.4607	47.3485	51.4955	55.195	58.8281	63.3842	65.6446	68.7294	71.5161	76.1257	79.5169	79.7825	83.2918	88.0431	88.4252	85.8424	82.4588	76.4584	68.7816	61.3127	51.6075	43.6662	36.5446	28.6519	21.4204	16.9336	13.4158
527.01	0	0	0	3.24997	10.604	14.4302	17.1747	11.2689	6.15985	3.73294	3.42858	0	0	0	15.5568	64.7283	75.4795	79.5282	73.363	63.3741	53.1417	45.3821	45.4633	45.7645	49.7811	53.4235	57.1646	61.3353	63.78	66.8856	69.7578	74.3747	77.4826	77.6022	81.0723	85.3634	86.286	84.7519	81.195	75.8186	67.7864	60.2318	50.5309	42.6837	35.8432	28.2507	21.1604	16.5457	13.1917
528.05	0	3.43999	0	0	6.19701	14.101	16.0342	10.847	5.14323	2.95625	2.79243	0	0	0	2.75238	63.5328	74.9456	77.7263	71.4743	62.4159	52.0074	44.6191	44.5578	44.2981	47.858	52.1973	55.4713	59.2715	62.3089	66.0314	68.2705	73.2004	76.442	76.0453	79.2274	83.6524	84.2818	82.9253	79.1583	74.3606	66.6163	58.4619	49.2838	42.1657	34.9529	27.6851	20.9009	16.3922	13.2276
528.95	0	0	0	0	3.46722	13.1222	15.9261	11.0712	6.13989	3.51462	3.15396	0	0	0	0	62.15	73.1098	76.349	69.7285	61.8715	51.6832	43.6404	43.7675	43.1313	46.9348	51.6338	54.5276	57.7995	61.2654	64.7621	66.5581	72.0726	75.297	74.8552	77.754	82.3442	82.8057	80.7869	77.4659	72.8997	64.8839	57.2728	48.5906	41.5956	34.2066	26.9904	20.5127	16.1564	13.113
530	0	0	0	0	2.16945	12.9892	15.9083	11.1987	6.24009	3.61637	2.95775	0	0	0	0	59.9928	70.5004	74.2804	68.5547	61.0993	50.6013	42.1994	42.9327	42.4083	46.7392	50.7813	53.1443	56.9638	59.552	62.4782	64.6006	71.1369	73.1466	73.4557	76.7112	80.7845	81.2596	78.6531	76.0132	70.8103	63.2775	56.5145	48.0094	40.5505	33.9076	26.5231	20.1601	16.0453	12.9224
531.04	0	0	0	0	3.48759	12.3621	15.7807	11.582	7.15902	3.30206	3.49275	0	0	0	0	57.5908	67.5645	72.2146	67.7635	60.1635	48.8871	41.4323	41.735	41.6015	45.5413	50.0087	51.887	55.6842	57.8702	60.4794	62.5971	69.1631	71.2839	72.0486	74.473	79.047	79.4159	77.5831	75.4362	69.468	62.2056	56.1913	47.1137	39.3786	33.5133	26.3785	19.7326	15.7735	12.7135
531.94	0	0	0	0	1.35471	14.9251	15.4848	11.598	7.19639	2.77788	4.05773	1.70302	0	0	0	55.3293	66.4279	70.5575	66.3036	58.2524	47.5819	40.7044	40.4521	40.7798	44.4894	49.1293	50.4867	54.3208	55.9577	59.3604	61.6635	66.8883	69.525	70.5417	72.1311	77.3064	77.4362	76.2027	73.657	67.8582	61.2798	54.2664	45.5797	38.3461	32.7693	26.1249	19.3499	15.6191	12.6746
532.98	0	0	0	0	1.01832	16.7751	15.6143	13.0606	8.82195	3.52343	5.02495	3.78761	0	0	0	51.7951	65.3394	69.0859	64.8105	56.3927	46.6207	39.5722	39.1563	39.9082	43.6184	48.1974	49.7127	52.4479	54.6039	58.4148	60.6166	64.394	68.0084	68.7274	70.4131	75.3314	75.7631	74.0611	72.0151	66.6185	59.9311	52.4274	44.6806	37.8213	32.0667	25.4291	19.0469	15.4704	12.5718
534.02	0	0	0	0	1.53222	16.1608	15.5891	14.6411	9.72156	4.84836	5.33031	5.57874	0	0	0	46.8274	64.457	67.0186	62.9662	54.9386	45.2601	38.3468	37.9915	39.0211	42.3402	46.4206	48.5171	51.5324	53.1493	56.8673	59.3262	62.8869	66.1664	67.1279	68.5775	72.9549	73.9044	71.9305	70.1227	65.0264	58.5539	50.7841	43.8526	37.0113	31.4552	24.7592	18.5406	15.0591	12.3873
535.07	0	0	0	0	3.5462	14.311	15.7757	15.303	10.2499	6.61023	5.76404	6.72496	0	0	0	41.5141	63.799	65.5259	61.2482	53.9943	44.515	37.6698	37.4663	37.997	40.64	44.9737	47.2158	50.1075	52.5114	55.1648	57.6058	61.815	64.608	65.4771	67.6488	71.3375	71.8162	70.3452	68.6627	63.9595	57.6428	50.3394	42.8446	36.3227	31.084	24.4733	18.22	14.742	12.1371
535.97	0	0	0	0	3.88057	13.9318	16.958	15.6837	11.6083	8.18912	7.25164	8.41979	0	0	0	34.0951	62.7427	63.7587	59.1409	52.1656	43.8431	36.5966	36.9485	37.0356	40.0123	43.6567	46.0826	48.9482	51.1575	54.2864	56.0307	60.5578	62.8771	63.8039	66.0014	70.0269	70.473	68.6895	67.4736	62.8237	56.4298	49.4765	41.7906	35.5265	30.6151	24.0532	17.8019	14.5046	11.9886
537.01	0	0	0	0	3.26655	14.7442	17.8795	16.771	14.4773	10.4104	9.05972	10.2746	0	0	0	22.9592	60.3984	62.7654	57.9963	51.0107	42.6793	35.2596	35.963	36.1528	39.3104	42.4449	45.1977	47.9291	50.1855	52.5532	54.519	59.1271	61.4765	62.1512	64.7189	68.7332	68.906	67.1266	65.6974	61.6517	54.6288	48.6302	41.129	35.2154	29.9688	23.3234	17.7061	14.2796	11.9412
538.05	0	0	0	0	0.787732	15.8069	18.0286	18.8052	17.7709	12.1575	11.316	13.2756	0	0	0	9.20091	58.2694	60.7737	56.3185	50.3337	40.9424	34.3114	34.3915	35.179	38.2597	42.0631	44.5798	46.9918	48.7467	51.6228	52.9828	57.3273	60.2152	60.6112	63.1039	66.8498	67.7045	66.0241	63.7474	59.8059	52.9198	47.5868	40.4821	34.5687	29.0347	22.7944	17.4056	14.1568	11.8011
538.95	0	0	0	0	0	16.5419	19.2155	21.4731	19.6086	15.5019	13.0311	16.3895	5.17399	0	0	0	56.7673	59.4213	54.9558	49.5443	39.8135	33.7021	33.5155	34.044	37.064	41.3199	43.1961	45.5763	47.9997	50.252	52.1288	55.884	59.0907	59.4087	61.8149	65.4248	65.7746	64.9307	62.8326	58.305	51.8821	46.7094	39.736	33.6907	28.5661	22.6162	17.1485	14.0264	11.5818
540	0	0	0	0	2.61401	17.8754	21.1785	24.6479	23.5313	20.5489	17.8259	20.7125	16.0054	0	0	0	55.2861	57.5349	53.7255	47.5786	38.9519	33.6467	33.2226	33.6181	36.1831	40.4264	41.9871	44.3299	46.9446	49.3926	50.8658	54.6868	57.3399	57.9174	59.3917	63.863	64.4602	63.3507	61.5981	56.8111	50.8423	45.6929	38.5164	32.4574	28.1287	22.3296	16.7104	13.7053	11.3938
541.04	0	0	0	4.42845	6.72475	18.4599	23.0844	26.8826	28.2346	25.8751	21.8535	25.5953	25.3633	0	0	0	53.0089	56.5036	52.5584	45.7919	38.4486	33.1428	32.5073	33.0563	35.2331	38.9785	40.9791	43.6282	46.0837	47.691	49.7129	53.6149	55.7652	56.4961	57.7915	62.2068	63.2962	61.6824	59.946	55.6711	50.2212	44.8979	37.891	31.754	27.5577	21.9045	16.4276	13.4706	11.223
541.94	0	0	0	3.24614	7.75102	21.1193	24.7862	28.3737	33.4975	29.8167	26.923	31.4495	33.2211	0	0	0	50.0797	54.9892	51.7048	44.9674	37.6308	31.7109	31.8195	32.382	34.5827	38.2029	40.0775	42.5315	44.8691	46.4517	47.8948	52.3537	54.4365	54.8746	56.5402	61.0611	62.1932	60.2096	58.1782	54.5366	49.1486	43.3179	36.9974	31.3956	26.5198	21.4396	16.2564	13.3907	10.9664
542.98	0	0	0	3.22932	9.87416	21.8276	27.079	31.7365	39.0981	35.2701	31.9394	37.6103	39.9863	0	0	0	46.6417	54.0147	50.1378	43.9813	36.3809	30.3138	30.645	30.931	33.9177	37.6597	38.6021	41.2156	43.286	45.0567	47.445	51.0408	53.4647	53.1928	55.3316	59.3928	60.3686	58.6159	57.0582	53.4059	48.1167	42.4508	36.169	30.9646	25.8546	20.9694	15.9461	13.0977	10.8142
544.02	0	0	0	5.46211	13.7684	24.2243	29.8228	36.7568	46.3961	43.0151	39.3244	43.8413	47.175	0	0	0	39.753	52.4657	48.9175	42.7961	35.2075	29.5355	30.2969	30.3598	32.8138	36.437	37.6824	39.8202	42.0937	44.1558	46.1426	49.7991	51.7475	51.5759	53.7261	57.2515	57.9215	56.8009	55.5477	51.9571	46.688	41.2757	34.8818	30.0481	25.2985	20.3719	15.4827	12.7327	10.7201
545.07	0	0	2.72937	8.54314	19.6096	26.7937	32.9054	42.0646	52.8297	50.1035	45.1318	50.28	53.705	0	0	0	30.7923	51.4083	47.4039	41.7943	34.5934	29.2145	29.4854	29.7721	31.5078	35.1984	36.5583	38.8874	40.5814	42.5267	44.6142	48.256	50.345	50.7245	52.6758	55.7669	56.4719	55.5557	54.1299	50.6288	45.8132	40.7626	34.5016	29.1684	25.1191	19.9907	15.1763	12.4876	10.5899
545.97	0	0	2.43539	15.0505	23.3405	29.3552	34.8001	44.9074	58.0772	55.4013	51.4998	56.5928	59.8348	0	0	0	20.5446	50.2655	47.2361	40.9938	33.808	28.3345	28.2885	29.4169	30.5283	34.0282	35.7512	38.6493	39.6545	41.2454	42.5807	46.6588	49.2822	49.7765	51.5649	55.093	55.0272	54.6801	52.7126	49.4074	44.6167	39.3953	33.9529	28.7329	24.6681	19.5127	14.977	12.206	10.2861
547.01	2.94528	9.16959	10.3384	23.1776	26.8944	30.9231	37.0166	48.2287	62.9021	61.143	57.1268	61.6677	65.8587	16.2073	0	0	8.71808	48.6628	45.8734	39.6447	32.8992	27.9456	27.1112	28.4057	29.6828	33.3101	34.6647	37.8137	38.3926	40.6166	41.696	45.5469	48.4117	48.4616	50.2358	53.5604	54.175	53.4076	51.2369	48.2602	42.9907	38.7471	33.1607	28.3394	23.9944	19.1648	14.6234	11.9131	10.1343
548.05	10.8012	21.5996	16.5823	21.4894	24.4099	32.8001	38.9031	49.7916	66.1946	65.9726	60.8995	65.2362	70.8155	36.9442	0	0	0	47.0402	44.1306	38.8837	32.0334	27.4131	26.6887	27.7259	28.8811	32.2096	34.1473	36.8499	37.9651	40.2605	40.8617	44.8323	46.8494	46.7758	49.0228	52.0483	52.8307	51.7694	50.2621	47.4775	41.9371	37.8886	32.04	27.8719	23.3798	18.8	14.1436	11.8361	10.0797
548.95	8.0266	17.6966	20.9578	18.2117	23.0202	34.3331	39.6724	52.6417	68.9461	68.9102	63.2056	67.9824	73.4249	50.359	0	0	0	45.9139	42.8007	38.0749	31.5222	27.3699	26.5253	26.612	28.1454	31.9145	33.3741	35.6053	36.8247	38.9857	40.4278	43.7602	45.5194	46.1817	47.8958	51.3415	52.2781	50.2654	49.4399	46.4156	41.3087	37.2271	31.3905	27.1059	22.9827	18.4783	13.7911	11.6598	9.88705
550	10.9723	19.756	16.0847	16.6628	26.9447	34.2288	39.5475	52.844	71.0562	70.1459	66.2662	70.5798	75.6329	60.3857	0	0	0	43.9958	42.3258	36.7971	30.7016	26.3904	25.8943	25.5391	27.3949	31.2379	32.9903	34.7361	36.0383	37.4514	39.2817	42.4877	44.2062	45.2944	46.6977	50.218	50.6917	49.0773	48.09	45.0995	40.6047	35.9957	30.8695	26.4591	22.5967	17.9831	13.6025	11.3678	9.54418
551.04	0	11.988	13.7641	17.1986	28.7687	34.4094	38.9627	54.5167	72.9696	72.4214	68.0844	71.8189	78.6361	67.7768	0	0	0	42.1736	41.0653	35.3314	29.8732	25.2273	25.4634	24.5999	27.0246	30.424	31.4455	33.5777	34.7692	36.799	38.0271	41.4766	43.303	43.9487	45.7152	48.3408	49.2148	47.8465	46.6274	43.956	39.5533	35.0316	30.0079	25.5312	21.9128	17.5921	13.6373	11.1359	9.31756
551.94	5.75182	5.17118	17.892	15.0023	27.6238	34.4757	40.7509	54.4222	74.1435	74.9352	68.9206	72.1716	80.3712	71.7149	0	0	0	39.9033	39.5284	34.5078	28.9424	24.2066	24.8399	24.0773	26.8182	29.6184	30.2179	32.7622	34.2274	36.4213	36.8529	40.5069	42.0637	42.1441	44.5007	46.7707	47.4269	46.6668	45.668	43.0156	38.5809	34.0946	29.1131	25.1699	21.3251	17.1159	13.4862	11.0257	9.16505
552.98	16.6999	7.80991	22.8158	18.831	27.9159	33.9601	41.3598	55.2966	75.931	77.5579	69.8492	72.5666	81.6977	73.4618	0	0	0	37.3993	38.7222	33.4508	28.048	23.957	23.7867	23.8051	26.0494	28.7054	29.5578	31.8011	33.9345	35.2147	36.7482	39.6315	40.802	41.1424	43.0375	45.7753	46.3163	45.7282	44.4694	42.0428	37.54	33.2154	28.2091	24.6917	20.7135	16.7677	13.0948	10.7625	9.09253
554.02	13.2392	11.2136	23.2917	21.9795	29.8246	33.5892	42.4299	55.5543	77.6849	79.94	72.9673	74.7319	83.6905	75.2096	0	0	0	32.6476	38.2851	32.6478	27.2889	23.5353	22.9971	23.3745	24.5593	27.6283	29.9176	31.0781	33.2693	33.887	35.7446	38.7088	39.8083	40.2948	41.7402	44.7888	44.9238	44.7105	43.363	40.9723	36.4092	32.2218	27.8629	24.3021	20.449	16.5388	12.6701	10.5444	8.89496
555.07	5.79613	12.7944	25.4597	26.361	29.8707	34.3079	42.2007	58.1366	79.4982	82.3506	74.43	76.9872	86.5484	76.494	0	0	0	27.137	36.9619	32.2404	26.529	23.3937	22.3232	23.11	24.165	26.9352	28.9069	30.8407	32.3781	32.9256	34.6077	37.3114	39.0359	39.3977	41.3782	43.4604	43.8375	43.5573	42.1576	40.0145	35.6364	31.6836	27.3685	23.4217	20.0687	16.2322	12.3965	10.1721	8.83874
555.97	1.11508	12.4505	23.58	31.2172	31.0516	37.6286	43.7889	60.088	81.1479	84.6614	77.6796	80.1708	88.9988	79.3562	10.3311	0	0	19.764	35.6008	31.0909	26.2655	22.7022	21.873	22.2378	23.9197	26.5422	27.9078	30.2034	31.3481	32.696	33.2806	35.7067	38.175	38.2947	40.4979	42.4363	42.7209	42.3739	41.1822	38.5475	34.6125	30.983	26.9023	22.9629	19.7476	15.8333	12.1635	10.0589	8.69388
557.01	13.3823	17.8148	22.5321	30.245	32.1028	39.7881	44.8545	62.7352	84.531	87.8235	81.884	84.3313	91.9829	84.2919	31.1261	0	0	9.13839	34.4171	30.1523	25.5228	21.7359	21.1176	21.8907	23.117	26.0957	26.7146	29.1918	30.2593	31.7466	32.5744	34.6893	37.0343	37.1954	38.9979	41.076	41.4412	41.1733	39.8908	37.1463	33.5768	30.3223	26.0252	22.4893	19.2555	15.4348	12.0298	9.85926	8.48666
558.05	9.28399	15.1862	16.5053	26.9262	32.4463	40.269	45.6867	63.7835	88.6951	91.908	86.6407	88.9311	95.7601	88.378	47.454	0	0	0	33.6421	29.5848	24.9302	20.6622	20.7411	21.0915	22.0551	25.7563	26.2938	27.9305	28.6959	30.7249	32.0247	34.0369	36.2976	36.0768	37.7045	40.5147	40.1605	40.2019	38.9576	36.5045	33.0262	29.5645	25.4211	21.9825	18.7564	15.1881	11.7453	9.82977	8.33152
558.95	14.9445	6.77192	20.631	27.6586	31.6036	40.6348	48.045	66.0677	92.5565	95.8189	89.649	91.4259	99.2555	90.8678	58.9471	0	0	0	32.5776	29.5229	24.0281	20.1607	20.3338	20.4666	22.3731	24.9243	25.5886	27.5445	28.0269	29.648	31.2424	33.2334	35.3143	35.4999	36.9199	39.4014	39.0682	39.2845	38.3067	35.8856	32.5637	29.0443	24.5928	21.2399	18.2474	14.6181	11.3916	9.5778	8.17138
560	15.8371	8.52935	27.485	29.7223	37.1953	43.519	49.9526	66.8414	96.7209	99.2016	92.7842	94.0253	102.279	91.5653	67.0137	0	0	0	31.4971	28.0675	23.5688	19.6119	19.6928	20.1681	22.2454	23.7755	25.1543	26.5894	27.9818	29.0565	30.415	32.3293	34.0273	34.82	35.8545	38.1175	38.716	38.4516	37.4594	35.1828	31.5289	28.5332	23.9275	20.7459	17.9001	14.3174	11.1307	9.4259	7.98211
561.04	14.147	9.1385	37.8022	33.5552	41.723	45.8427	51.2495	70.5368	100.668	101.314	95.2302	96.075	104.505	95.0283	72.6088	0	0	0	30.0705	26.9565	22.7556	19.3576	19.4608	20.2552	21.8734	22.9825	24.7486	25.7656	27.2175	28.3715	29.4346	31.4897	32.9666	33.8692	34.5416	36.8761	38.298	37.1973	36.5592	34.098	30.4627	27.8047	23.3019	20.2691	17.55	14.0353	10.9868	9.19238	7.74907
561.94	15.8738	6.60054	41.8715	33.2027	42.697	47.8206	51.1717	72.7368	101.11	104.045	97.0166	99.4259	108.078	97.9902	75.5236	0	0	0	27.9597	26.1663	22.1494	18.6784	19.1099	19.63	20.9085	22.6342	23.8123	25.0934	26.3062	27.7122	28.8881	30.2521	32.0772	32.6003	33.3757	36.3834	37.3019	36.3031	35.5082	33.199	29.3579	26.8916	22.5796	19.8031	17.021	13.8715	10.7752	9.02846	7.66952
562.98	20.3776	14.3634	37.0079	33.754	40.5944	47.1396	51.9582	74.6608	100.17	105.703	98.5736	100.87	109.509	99.8048	77.5958	0	0	0	24.5528	25.9876	21.0641	18.2716	18.5583	18.3696	20.3301	22.2589	23.0627	24.6349	25.3805	27.3394	28.256	29.4474	31.2487	31.4918	32.7411	35.4671	35.9246	35.0867	34.8089	32.0158	28.8695	25.9385	22.0209	19.2683	16.4978	13.4485	10.4569	8.75284	7.48957
564.02	25.1143	19.2046	21.522	25.5718	39.9049	47.0059	52.4462	73.6047	100.206	106.026	98.9709	101.842	109.302	99.8072	79.3866	0	0	0	19.8658	25.4689	20.7004	17.7842	17.6913	17.408	19.5401	21.596	22.7267	23.9913	24.8459	26.699	27.4304	28.709	30.3524	30.5115	32.2168	34.3173	34.8654	34.3165	33.6998	31.2438	28.2268	25.3266	21.8693	18.7242	16.1227	13.1596	10.2072	8.53571	7.33385
565.07	17.6641	21.6078	19.3449	34.4315	39.0536	46.1675	52.5751	71.5201	100.758	104.832	98.4728	100.091	106.674	100.299	81.6615	0	0	0	13.6584	24.6995	20.2432	17.5447	17.0239	16.9673	19.151	20.7139	22.4559	23.5192	23.9889	25.6555	27.0479	28.026	29.7308	29.8801	31.4011	33.2529	33.9484	33.8746	32.5922	30.7042	27.7506	24.6917	21.5279	18.1262	15.7235	12.8593	9.94442	8.31239	7.1631
565.97	19.3636	8.99981	24.5128	31.654	37.2691	48.3895	52.4538	69.4388	99.3492	103.604	98.0169	99.3249	106.253	100.537	83.2112	0	0	0	5.90846	23.9299	20.0147	16.8554	16.634	17.0646	18.453	19.8425	21.3616	22.9639	23.3191	24.7313	26.3398	27.5539	28.8244	29.3515	30.6471	32.4465	32.5401	33.1654	31.816	30.0827	26.5046	24.0902	20.5966	17.6675	15.3006	12.5443	9.78842	8.1846	7.04866
567.01	18.022	13.102	27.1182	29.617	37.7275	48.1742	52.2814	68.2262	97.8528	101.971	96.8661	97.482	104.709	98.8461	83.4127	8.80274	0	0	0	23.0118	19.2801	16.4064	16.2178	16.97	18.1076	19.5239	20.7356	22.3124	22.66	24.0495	25.3114	27.0405	27.8813	28.8961	29.7829	31.6561	31.6509	32.036	30.8898	29.1746	25.9183	23.3563	19.8115	17.35	14.9101	12.1572	9.50793	7.97673	6.95671
568.05	18.284	11.5921	27.1404	22.5784	39.8329	47.8212	52.6911	68.3164	95.4985	100.299	94.8066	95.9286	103.095	97.1527	82.129	27.3024	0	0	0	21.9867	18.9231	16.0745	15.9835	16.6055	17.9488	19.2001	20.3471	21.469	22.3181	23.8127	24.0522	26.5923	27.1526	27.8469	29.0492	30.8401	31.347	31.1142	29.7159	28.4591	25.5351	22.7398	19.2875	16.9031	14.628	11.9028	9.26583	7.82114	6.79812
568.95	17.6118	16.5798	22.7851	27.3811	41.0176	48.0059	52.7617	68.0779	94.2797	98.4409	92.8787	94.3383	100.229	95.8322	82.7971	42.1983	0	0	0	21.2239	18.2644	15.6018	15.6655	16.0324	17.454	18.6816	19.9154	20.909	21.8694	23.3328	23.453	25.8028	26.6631	27.1579	28.0731	30.0257	30.9591	30.3808	28.9998	27.7811	25.0188	22.1896	18.9148	16.4887	14.4256	11.5945	8.90666	7.60789	6.59931
570	11.0561	16.895	12.6643	31.8015	41.6402	48.1149	52.8955	67.4859	92.5104	96.6182	91.1483	93.726	99.0514	94.2843	84.072	51.8319	0	0	0	20.5941	17.9458	14.9664	15.3208	15.4334	16.5137	18.2065	19.2393	20.1053	21.1853	22.7108	23.0664	25.1095	26.1599	26.0915	27.6403	29.5525	29.8731	29.311	28.5158	26.9646	24.1863	21.7475	18.4414	16.1378	14.057	11.4018	8.73058	7.54503	6.33803
571.02	7.53473	23.1249	9.93199	27.5653	41.2479	45.9682	52.4641	67.9442	91.954	94.3123	89.519	92.6443	98.3237	93.7977	86.3708	59.3054	0	0	0	18.933	17.3028	14.3846	14.7655	14.6863	15.6772	17.9588	18.787	19.8174	20.5554	21.4227	22.6429	23.9558	25.373	25.2798	26.7638	28.466	28.4976	28.3776	27.8466	25.876	23.512	21.2587	17.9895	15.5947	13.6296	11.1415	8.52318	7.52548	6.27185
572.05	6.56824	29.1958	19.2248	26.0514	39.0624	45.2407	51.3774	66.6541	90.7841	94.1805	88.4186	92.1762	97.6186	94.0031	86.9278	64.4113	0	0	0	16.8373	16.4716	13.9599	14.1492	14.2911	15.4714	17.4181	18.3099	19.1993	20.4955	20.9567	22.3108	23.3296	24.6145	24.3546	26.0097	27.5206	27.7168	27.5393	26.8785	24.9424	23.0148	20.527	17.4479	15.1866	13.2481	10.9857	8.49823	7.35506	6.15852
572.94	14.3027	24.1707	22.7558	26.2084	37.3566	47.7603	51.8335	67.1859	91.9215	95.0996	88.0873	92.7967	96.9256	95.2958	88.1299	67.5061	0	0	0	14.6936	15.6798	13.589	13.7588	14.1131	15.6507	17.0419	17.4414	18.7943	20.2231	20.4411	21.3717	22.7954	23.793	23.9773	25.2033	26.8437	27.0901	26.7483	26.227	24.5899	22.341	20.1	17.1734	14.8603	12.9825	10.6421	8.42712	7.04223	6.1401
573.97	9.62018	15.0513	24.9176	32.9328	35.2158	49.4725	53.458	67.2307	92.638	95.9685	88.5113	93.0602	97.5275	94.7679	90.6168	70.1376	0	0	0	10.7257	15.3296	13.0364	13.457	13.9344	15.2256	16.9685	16.5498	18.3341	19.6998	20.1999	20.5802	22.1894	23.2689	23.5799	24.5989	26.7638	26.5414	26.0081	25.3184	24	21.6885	19.3831	16.9761	14.6498	12.5934	10.3789	8.21941	6.9121	5.88766
575	8.06602	5.76456	29.8835	31.3031	37.4785	51.1109	54.1692	68.4974	92.0526	94.8226	88.5785	92.8259	98.5903	95.2045	93.5538	72.7937	0	0	0	4.75036	14.9205	12.8766	13.0622	13.2769	14.4337	16.6549	16.3272	17.7806	18.773	19.555	19.7914	21.6594	22.7727	22.5899	23.9833	25.7563	25.7212	25.6838	24.6222	23.1763	21.1006	18.9671	16.433	14.1206	12.1569	10.0513	7.91646	6.74712	5.7712
576.02	3.45815	8.98223	29.4186	36.3064	40.7375	51.6224	55.6283	67.9768	91.0628	94.4255	88.6451	93.5722	99.02	95.3454	95.4233	76.7194	0	0	0	0	14.4598	12.7745	12.5278	12.9826	14.02	15.8158	16.2556	17.2177	18.1288	18.8646	19.479	21.3451	22.193	21.9768	23.2044	24.7531	25.0583	25.0497	23.9507	22.3031	20.5279	18.3927	15.7848	13.7033	11.7852	9.77959	7.66975	6.56163	5.64823
577.05	15.7678	16.3906	22.1803	36.5415	45.1103	51.105	58.4292	68.2776	91.4364	94.8492	88.3027	93.8094	98.9884	95.5633	96.4105	79.4274	12.0243	0	0	0	14.1578	12.5294	12.2066	12.8304	13.7411	15.7923	15.9221	16.6208	17.6789	18.2061	18.8091	20.8847	21.7212	21.483	22.7345	23.8696	24.5429	24.2445	23.4364	22.0167	20.0047	18.0526	15.4354	13.3194	11.5968	9.54927	7.49432	6.38278	5.4306
577.94	20.3192	19.4764	24.4829	34.3842	45.0797	51.8985	60.0774	68.5516	91.2908	95.1477	89.221	92.7541	99.3226	96.0371	97.5729	82.1438	29.9019	0	0	0	13.8745	12.0548	12.0295	12.5857	13.0406	15.5024	15.1987	16.5264	17.0513	17.9458	18.4971	20.0038	20.8836	21.1187	22.1111	23.134	24.1622	23.4659	22.8283	21.7421	19.6028	17.259	15.3098	13.0589	11.4478	9.29983	7.29262	6.24187	5.24739
578.97	22.2493	15.974	21.8698	30.7939	44.8758	54.4449	59.2455	67.2062	90.1796	94.1632	87.7296	92.2221	98.7098	96.3329	98.4076	83.3543	43.2807	0	0	0	13.1385	11.5468	11.7506	12.0627	12.7023	14.8723	15.1953	15.8233	16.4375	17.5662	18.0441	19.4396	20.203	20.4455	21.5133	22.6627	23.3128	23.051	22.5026	20.9419	19.0505	16.7937	14.8965	12.7462	11.1908	9.02039	7.19429	6.1128	5.26191
580	14.5588	15.8759	16.3269	30.9082	43.5785	56.1184	59.1998	65.9029	89.4324	91.3838	85.9515	92.0763	97.488	95.389	99.1976	85.4331	54.0784	0	0	0	12.2159	10.9675	11.1639	11.658	12.4901	14.0185	14.6145	15.6267	16.2013	16.9032	17.5912	18.8476	19.5154	20.1795	20.7397	22.0856	22.3878	22.2614	21.9992	20.019	18.4243	16.4967	14.4427	12.5379	10.8155	8.82828	6.96117	5.94706	5.24442
581.02	15.3927	15.6718	14.5825	32.7606	44.3379	56.2951	58.9564	65.9094	87.5464	90.1603	83.8329	90.1819	96.1497	93.6834	98.4643	87.8531	62.2275	0	0	0	11.2601	10.5565	10.9463	11.4968	12.1488	13.5882	14.307	14.8772	15.8213	16.2408	16.8571	18.2591	19.3758	19.5176	20.1283	21.6023	21.8559	21.5843	21.2224	19.3493	17.873	16.1684	14.0551	12.2853	10.5066	8.7053	6.77595	5.88516	5.12141
582.05	21.5589	18.1442	26.7208	29.1877	43.3118	56.6933	57.9365	66.4609	84.8395	88.2801	82.7914	87.5513	94.5023	92.918	98.8484	89.2712	67.0801	0	0	0	9.78418	10.4518	10.6717	11.1506	12.06	12.9074	13.8454	14.4219	15.2236	15.8469	16.2358	17.6502	18.7249	18.5602	19.4673	20.8387	21.4471	20.8347	20.4092	19.3584	17.5796	15.7458	13.6999	11.785	10.408	8.54742	6.68985	5.7708	4.99601
582.94	20.5427	25.2786	23.7672	28.2236	45.156	57.7319	57.0244	65.3914	82.3664	85.9997	79.9714	85.0762	91.8805	92.0672	100.114	90.8682	69.395	0	0	0	7.32423	10.1228	10.3995	10.9158	11.7563	12.3791	13.577	13.9171	14.7569	15.4214	15.8694	17.2869	18.0764	18.0259	18.7666	20.5093	20.5951	20.3252	19.8679	18.8051	17.1288	15.2475	13.2252	11.3725	10.1516	8.3045	6.58832	5.7006	4.88321
583.97	20.5311	27.7527	13.6529	25.2431	43.173	56.3538	58.267	63.5611	80.5134	82.2035	78.1986	83.5685	88.8862	89.6427	101.086	92.4898	70.8066	0	0	0	3.87474	9.50442	9.80835	10.4462	11.4077	12.25	13.159	13.9534	14.6612	15.0733	15.7677	16.8228	17.453	17.6492	18.3814	20.004	19.6634	19.5433	19.5334	18.2489	16.6017	14.7247	12.7863	11.1557	9.87656	8.13771	6.31953	5.53143	4.69875
585	17.4926	20.8341	12.0513	27.6653	43.8312	56.2129	59.4411	61.6267	78.2611	81.26	75.6048	81.13	85.9669	87.2828	99.2681	94.4413	72.6295	0	0	0	0	9.36205	9.48501	10.2688	10.8388	12.0948	12.6502	13.6414	14.0837	14.6534	15.6542	16.3317	17.0695	17.3603	18.0163	19.5432	18.9426	18.9361	19.0902	17.7652	15.9798	14.2665	12.4739	10.938	9.5123	7.86795	6.13362	5.32364	4.60202
586.02	23.7016	20.6787	9.13208	26.5646	43.0437	58.0166	58.9302	60.5531	76.1171	79.0884	73.8439	78.5685	83.6067	85.8916	98.0506	95.6232	73.824	0	0	0	0	9.37269	9.48424	9.96818	10.7259	12.0544	12.4619	13.4025	13.5166	14.0724	15.2594	15.9711	16.5703	16.6626	17.6478	18.7579	18.3406	18.6556	18.4634	17.4316	15.4781	14.0752	12.1814	10.6283	9.22193	7.52294	5.95567	5.1803	4.48613
587.05	12.9458	23.7088	15.1749	20.1661	44.7284	58.7873	56.6518	59.239	73.3548	76.3942	72.2226	75.9446	82.3698	85.408	98.1378	96.7975	74.7875	10.2435	0	0	0	9.20995	9.3724	9.32868	10.6499	11.8845	12.1171	12.9784	13.0319	13.7987	14.7	15.2719	16.0759	16.3172	17.0874	17.9045	18.1186	18.4236	17.9932	16.9006	15.1322	13.7269	11.9326	10.459	8.90321	7.21819	5.82778	5.08533	4.38275
587.94	8.24765	29.8055	13.3696	13.2841	43.6345	57.2139	55.5485	57.652	71.2154	72.8184	70.7693	73.4808	81.1383	83.7675	98.077	97.6237	75.9826	23.832	0	0	0	8.64031	9.19611	9.0426	10.5379	11.4407	11.901	12.5124	13.1244	13.531	14.2464	14.7406	15.6336	15.7074	16.4588	17.4173	17.8901	17.7494	17.6902	16.5071	14.7012	13.2597	11.6076	10.1601	8.6973	7.06418	5.75179	4.95253	4.26551
588.97	13.7314	23.7051	17.1202	13.5034	39.8587	55.6755	55.6289	55.9357	69.087	70.2983	67.9305	70.3694	79.0549	81.6022	98.0253	98.2129	77.6579	34.6981	0	0	0	7.97783	8.62851	8.97323	10.2494	10.9402	11.5023	11.9138	13.004	13.263	13.6971	14.4977	15.2361	15.4017	15.9188	17.2383	17.5817	17.0384	16.9995	16.1106	14.3044	12.9296	11.2762	9.75006	8.57579	6.94397	5.70706	4.80256	4.17294
590	16.0826	25.4582	7.85477	21.112	39.0748	56.6891	56.913	54.6345	67.0171	68.0817	64.7546	68.2401	75.4708	78.6534	97.5653	98.7466	78.3234	41.0262	0	0	0	6.97187	8.27526	8.75857	9.66074	10.7045	11.13	11.9508	12.2961	12.6488	13.0342	14.496	14.747	15.0081	15.7322	16.8659	16.7885	16.4652	16.1162	15.386	14.0955	12.618	10.9207	9.45936	8.38499	6.73257	5.49116	4.74708	4.09014
591.02	7.5914	19.885	16.663	24.3264	39.8759	56.7734	55.9582	53.3253	65.5251	66.5636	62.2728	66.74	72.8746	76.6093	96.8569	99.5437	79.5373	44.26	0	0	0	5.80349	7.62092	8.25818	9.59759	10.5621	10.7505	11.7801	11.4129	12.1448	12.7512	13.767	14.2966	14.8682	15.4055	16.1817	16.2341	15.9029	15.659	14.9083	13.7888	12.2188	10.6334	9.286	8.16823	6.62265	5.29676	4.62082	4.03532
592.05	10.3005	21.9108	9.78977	24.1094	41.4973	56.9744	54.078	53.523	64.8111	65.4648	60.7	65.7033	71.808	76.0055	95.6487	100.634	79.9741	46.1846	0	0	0	4.4002	7.2119	7.86898	9.22997	10.0732	10.2803	11.4376	10.838	11.876	12.4755	13.4627	14.0393	14.3726	14.9585	15.6406	15.9567	15.4434	15.5762	14.4414	13.4172	11.7676	10.4632	9.02818	7.88883	6.56034	5.17584	4.43773	3.93545
592.94	10.0358	13.7167	10.8926	18.3662	37.9016	57.2969	53.9468	54.3464	62.4678	64.7668	60.259	64.3897	71.88	76.3	96.1596	100.352	80.7931	47.5161	0	0	0	1.70553	6.98701	7.77256	8.82048	9.77016	9.84307	10.6902	10.8492	11.8134	12.1462	13.0812	13.9223	13.7628	14.3502	15.3728	15.681	15.137	15.1801	14.3245	12.8538	11.4727	10.1851	8.72549	7.73647	6.35428	5.07415	4.31015	3.81703
593.97	10.4819	15.3969	13.7817	17.6396	36.428	56.0613	53.7038	52.8545	60.6362	62.3995	59.2285	63.1491	70.3973	74.7993	96.3303	99.9086	82.1094	47.9051	0	0	0	0	6.82803	7.37562	8.57207	9.2383	9.54209	10.3059	10.7138	11.5338	11.8152	12.9111	13.4755	13.3863	13.9445	14.9755	15.282	14.6946	14.8033	13.897	12.4325	11.2848	9.72904	8.42736	7.58518	6.15421	4.94345	4.18778	3.71992
595	11.2514	16.2798	17.3887	21.454	36.6234	55.9768	54.4688	50.7382	59.4782	60.2401	57.0622	61.3957	68.7632	73.3548	95.1456	100.562	82.6333	48.8604	0	0	0	0	6.57034	7.32629	8.51588	8.99847	9.65091	9.97928	10.5013	11.2162	11.6312	12.3559	12.8829	12.9715	13.6657	14.3648	14.874	14.4331	14.4002	13.5486	11.9737	10.8962	9.36004	8.3668	7.37976	6.05391	4.79209	4.05427	3.59475
596.02	19.2632	8.62164	10.7954	28.1195	38.8511	56.0791	53.5907	49.7827	58.1406	58.3551	54.9816	59.6776	66.9574	72.1576	94.0693	100.789	82.686	49.357	0	0	0	0	6.33008	7.03242	7.95461	8.58949	9.71731	10.0283	10.1237	10.7676	11.1858	12.0613	12.3022	12.5699	13.4786	13.618	14.2876	14.0693	13.9537	12.8118	11.8131	10.5455	9.31376	8.21173	7.16393	6.00037	4.69754	3.87273	3.55555
597.05	11.4923	13.3029	13.4543	24.9684	35.612	55.9921	53.9239	48.8781	56.2056	57.1325	53.4278	58.0491	65.2802	70.8788	93.7729	99.6661	81.6546	49.7381	0	0	0	0	6.24518	6.92998	7.25996	8.65124	9.19588	9.91087	10.1992	10.5464	10.6487	11.6263	11.9558	11.9445	12.9059	13.5193	13.8124	13.8105	13.3766	12.6436	11.613	10.4687	9.1833	7.99055	6.95327	5.7699	4.64472	3.85465	3.48702
597.94	12.949	16.0088	15.2328	23.7853	34.8576	56.2579	52.2385	46.8667	54.8943	55.3212	52.7913	56.5235	63.2634	69.8677	93.8395	98.9547	82.0276	49.2594	0	0	0	0	5.90674	6.47441	7.21601	8.36687	8.64002	9.64465	10.1762	10.0635	10.3904	11.4524	11.6235	11.8274	12.4873	13.5204	13.3482	13.6003	13.1335	12.3655	11.2958	10.4016	8.83479	7.6825	6.73066	5.52575	4.51215	3.84456	3.36848
598.97	9.68064	11.7421	10.1993	17.5589	38.6939	55.8776	53.2397	46.6334	54.0362	53.6329	51.2385	55.1652	61.9878	69.102	92.5486	98.7602	81.2914	49.2621	4.98299	0	0	0	5.24582	6.41291	7.23374	8.04137	8.508	9.05938	9.60044	9.79474	10.1601	11.265	11.3232	11.673	12.0962	13.1924	13.0847	13.072	12.8509	12.1583	10.8812	9.93403	8.43654	7.49198	6.53309	5.32104	4.31272	3.77887	3.23168
600	0	7.18883	5.32163	15.2994	42.1399	54.3384	52.7829	46.0632	52.5722	52.576	49.8147	53.3272	60.768	68.3798	91.7398	98.0419	81.3564	48.8204	12.5167	0	0	0	4.75881	6.25029	6.80801	7.56476	8.39691	8.33183	9.01087	9.43141	9.92258	10.7275	11.0122	11.4032	11.8933	12.3111	12.6364	12.2596	12.6624	11.6518	10.4892	9.44347	8.09239	7.30434	6.41486	5.23325	4.13544	3.64362	3.17301
601.02	0	8.5545	6.5405	12.8352	39.2282	53.0464	52.5159	45.5906	50.9386	51.8364	48.604	51.6676	58.9826	66.6793	90.5168	97.4798	81.7373	48.2556	16.4956	0	0	0	4.04594	6.13548	6.59339	7.52815	8.15147	8.03772	8.49756	9.39962	9.68107	10.293	10.6959	10.657	11.4038	11.8957	12.4411	12.0403	12.1644	11.1453	10.2428	9.21315	7.93304	7.09846	6.21802	5.08961	3.99426	3.56793	3.09685
602.05	0	5.858	14.1031	12.0696	34.3457	54.1361	51.1876	44.7266	49.7436	50.7771	47.8806	50.6781	57.1183	66.0082	89.9672	97.3386	82.102	48.161	18.3878	0	0	0	2.83208	5.63391	6.46284	7.33862	7.69409	7.99967	8.42517	9.35992	9.60547	10.1744	10.4525	10.3697	10.9631	11.6008	12.0168	11.9723	11.5895	10.8291	10.1324	9.02523	7.87267	6.86659	6.04333	4.98353	3.93484	3.50384	2.98432
602.94	4.90819	0	20.2451	9.42422	35.86	55.4566	50.8323	43.3664	47.6051	48.7709	45.8316	49.4105	55.6383	64.2886	88.195	96.9944	81.5082	48.5095	19.2186	0	0	0	0.324689	5.57667	6.3167	6.9972	7.56266	8.26664	8.31176	8.97176	9.44476	10.2043	10.1602	10.3588	10.5021	11.3573	11.7451	11.5367	11.0903	10.6739	9.89805	8.74126	7.63451	6.65317	5.86378	4.77859	3.91521	3.28863	2.92965
603.97	2.1168	13.8286	13.6713	15.561	36.4617	53.7367	49.7933	41.4537	45.7688	46.9044	43.404	47.7791	53.9469	62.7157	87.1444	96.4324	80.1389	48.4011	19.1873	0	0	0	0	5.48162	6.00129	6.89327	7.37556	7.89534	8.2249	8.77645	9.14028	9.639	10.0503	10.033	10.3892	10.9443	11.3551	11.0508	10.9847	10.4416	9.42431	8.56093	7.25784	6.55295	5.71141	4.72496	3.78521	3.18548	2.88513
605	6.65348	17.575	7.71855	18.0699	36.0865	52.5372	49.1675	39.7605	44.5759	44.6443	41.1824	45.5787	52.1523	61.0971	85.605	95.4054	79.0793	47.6382	19.2776	0	0	0	0	5.39791	6.16084	6.87184	7.34017	7.43861	7.90309	8.61781	8.81111	9.24389	9.89615	9.6264	10.1625	10.7788	11.0359	10.8684	10.7596	10.0006	8.96458	8.34722	7.04495	6.43881	5.4586	4.57263	3.62504	3.06471	2.77112
606.02	1.69658	15.3006	16.8423	20.4116	33.8799	50.3047	47.6418	39.9236	44.2034	43.0318	40.1334	44.4666	50.5472	59.5786	83.719	94.4867	78.1655	47.0073	19.5208	0	0	0	0	4.91249	6.08663	6.65883	7.14369	7.1151	7.5412	8.41274	8.45277	8.78677	9.60598	9.26517	9.82956	10.6203	10.7042	10.673	10.4403	9.75652	8.68557	8.15956	6.91091	6.16354	5.36899	4.46276	3.53851	2.99071	2.73761
607.05	2.97422	7.65117	22.2257	14.6239	33.6814	48.5319	46.5306	39.3876	42.051	41.851	39.3246	43.3028	49.2068	57.8191	82.4226	93.0506	78.2774	46.751	19.6442	0	0	0	0	4.75754	5.8243	6.50836	6.83713	7.19834	7.39794	8.00976	8.16698	8.85881	9.1943	9.09058	9.5704	10.3978	10.4624	10.1909	10.0605	9.72188	8.51683	7.91774	6.69612	5.86846	5.22981	4.33779	3.50136	2.92215	2.74483
607.94	5.64881	14.1582	17.74	15.2877	33.8558	47.2743	45.4696	37.9201	40.4627	41.1881	38.7699	41.6727	47.4551	56.0755	82.0166	92.5049	77.9354	46.3553	19.1156	0	0	0	0	4.40718	5.20211	6.17728	6.70077	7.37067	7.39828	7.85968	7.82198	8.53999	8.92448	8.90027	9.35155	10.1476	9.98749	9.7416	9.65988	9.4096	8.32271	7.70362	6.44394	5.67943	5.09875	4.3048	3.36738	2.93511	2.65858
608.97	17.4842	14.8166	9.20914	16.531	33.5047	47.5251	45.6969	36.7344	39.3992	39.7085	37.4787	40.1932	45.5731	55.1147	80.5431	91.5474	77.1787	45.7394	18.6479	0	0	0	0	4.07906	4.91313	5.65386	6.4528	7.18799	7.36827	7.53339	7.53059	8.53332	8.72973	8.86908	9.08625	9.72862	9.7724	9.37457	9.51896	8.93559	8.06865	7.33074	6.34228	5.50985	4.96712	4.11335	3.28925	2.79152	2.51876
610	18.8345	14.5953	9.78234	17.6676	34.0053	48.0181	45.4161	35.8575	37.8554	38.5417	36.462	38.942	44.2312	53.8437	79.3952	90.8561	75.3079	44.7902	18.5116	1.24607	0	0	0	3.83463	4.62629	5.49423	6.1738	6.91337	6.86793	7.37591	7.2623	8.02584	8.50497	8.54181	8.65467	9.39019	9.48273	9.19673	9.42773	8.50643	7.83393	6.96963	6.24251	5.36292	4.91759	3.97066	3.16758	2.68582	2.47038
611.02	6.56307	13.8622	13.842	17.2344	35.1917	46.5582	43.9814	35.0469	35.7139	36.5983	34.9404	38.1436	43.4229	52.6016	79.1377	89.1022	74.3316	44.0792	18.3429	4.1549	0	0	0	3.47644	4.69926	5.7753	5.75387	6.32935	6.36237	7.20791	7.05408	7.74568	8.12705	8.27206	8.19282	8.95313	9.16353	8.9767	9.17039	8.4494	7.72868	6.76275	6.07654	5.25461	4.75889	3.84733	3.10113	2.67816	2.44029
612.05	0	17.2421	13.3904	17.7624	32.6454	45.8559	42.466	33.7065	34.8838	35.2421	34.4186	36.9219	42.4297	51.3283	77.6374	87.902	73.6812	43.8414	18.107	5.22403	0	0	0	2.68521	4.63542	5.82947	5.61399	5.99191	6.08007	7.02435	6.8147	7.42173	7.76653	8.0744	7.93543	8.72016	8.86545	8.89576	8.73336	8.29068	7.55682	6.64211	5.87096	5.18072	4.44014	3.78858	2.92284	2.7164	2.37867
612.94	0	13.1846	19.6401	22.2271	32.2191	44.7708	42.1622	32.5234	34.8626	34.6077	32.9966	35.4612	41.0901	50.2699	75.5556	86.403	73.4975	43.6396	17.6391	6.0316	0	0	0	1.00002	4.80804	5.47134	5.61699	5.91815	6.17731	6.54553	6.59525	7.31132	7.53135	7.74501	7.86192	8.66657	8.79255	8.68751	8.46208	8.01761	7.23545	6.5663	5.72909	5.04829	4.27908	3.62011	2.8934	2.63473	2.28925
613.97	3.82191	6.98896	15.6586	15.3282	27.2638	45.8912	42.0283	31.2036	33.7563	33.7175	31.9436	34.0647	39.8015	49.6216	74.597	84.8441	72.0732	42.9373	17.0889	6.50459	0	0	0	0	4.56389	4.85989	5.43631	5.91474	6.07598	6.43726	6.7778	7.10962	7.38363	7.50655	7.84761	8.50745	8.37889	8.37886	8.17558	7.66506	6.95737	6.31174	5.52822	4.98823	4.19416	3.58082	2.84257	2.52091	2.23709
615	3.41707	12.7454	7.04732	13.4633	27.7965	46.136	41.5358	31.0314	31.3354	32.6927	30.6418	33.1299	38.8196	48.4341	74.0531	82.9109	70.9646	41.6112	16.7619	6.74783	0	0	0	0	4.2225	4.6463	5.24472	5.67956	6.07509	6.13252	6.61252	6.78313	7.14631	7.2433	7.55378	8.02414	7.83927	8.04576	7.80105	7.36216	6.84882	6.11233	5.24181	4.77204	4.09095	3.46642	2.80007	2.39532	2.17168
616.02	0	13.3249	0	9.09409	25.6993	46.6199	39.5536	31.2294	29.8745	31.4342	29.6264	32.5504	37.5366	46.7457	72.1997	81.3099	69.9523	40.9791	16.7427	6.6766	0	0	0	0	3.80731	4.5818	5.06014	5.42722	5.82922	5.9859	6.29016	6.63766	6.97702	7.02221	7.29622	7.65256	7.49869	7.81543	7.42853	7.17722	6.64616	5.95324	5.12971	4.50415	3.90321	3.40405	2.67565	2.32642	2.1549
617.05	1.62408	8.77727	3.92295	10.838	28.694	44.7952	38.5234	30.3629	30.717	30.7186	28.2627	31.5582	36.5696	44.8175	69.7902	80.822	68.1359	40.4231	16.7768	6.5884	0	0	0	0	3.72199	4.58292	5.24589	5.37421	5.53912	5.7584	5.75173	6.44964	6.77726	6.59496	6.97075	7.64066	7.47909	7.57723	7.20525	6.99835	6.42159	5.85905	4.96838	4.43497	3.85585	3.27963	2.66032	2.29886	2.1118
617.94	11.5284	0	3.78306	2.95395	26.5791	42.4615	37.6806	30.3442	30.7795	29.752	27.757	30.7059	35.584	43.8072	67.7242	79.3229	65.9161	39.5069	16.3394	6.50761	0	0	0	0	3.50798	4.45193	5.19167	5.22312	5.35146	5.69456	5.80414	6.45621	6.57965	6.45106	6.87239	7.38871	7.3189	7.31037	7.15675	6.94112	6.21106	5.62986	4.79231	4.40183	3.81309	3.20061	2.59894	2.21246	2.04631
618.97	10.9343	8.8008	0	4.97489	25.2711	39.0143	37.345	29.2694	29.7067	28.6131	27.1265	29.9495	34.2653	42.9384	66.6611	77.5482	64.6721	38.3415	15.9392	6.03588	0	0	0	0	2.97325	4.24429	4.76208	4.77925	5.25607	5.33889	5.72611	6.16959	6.36188	6.17155	6.64801	7.00929	7.27822	7.03699	7.01096	6.76992	6.05002	5.44992	4.64489	4.23954	3.71631	3.08028	2.53034	2.07892	1.99644
620	10.0257	11.5794	0	7.29023	28.2289	37.7356	35.0744	27.4002	28.1576	27.9268	26.4759	29.1829	33.3523	41.9023	65.6121	75.6882	63.6134	37.5382	15.3724	5.99686	0	0	0	0	2.32573	3.66552	4.46384	4.44703	5.00872	5.13109	5.59063	5.76562	6.3204	6.2476	6.48234	6.95983	7.23266	6.87755	6.76305	6.40231	5.81658	5.35295	4.55002	4.04703	3.61377	3.03137	2.44682	2.01941	1.95342
621.02	9.05513	13.5017	3.7346	10.6152	30.9982	37.5008	34.1675	26.1816	27.7629	27.572	25.6048	27.9857	32.7086	40.7513	63.6372	74.266	62.0693	37.3178	15.25	5.87102	0	0	0	0	1.89402	3.32089	4.43534	4.5797	4.65233	4.83588	5.31182	5.52751	6.33785	6.25104	6.23997	6.89726	7.05955	6.847	6.5017	6.12813	5.62363	5.16976	4.31871	3.96837	3.52784	2.94444	2.36391	2.03413	1.9143
622.05	9.55285	0.243716	10.9468	10.6478	28.6224	36.2571	33.4683	27.0213	27.1312	27.2079	24.9	26.8286	31.8669	39.4986	62.0681	72.9724	60.351	36.2381	14.9854	5.75003	1.21043	0	0	0	0.755538	3.26376	4.2858	4.69556	4.46243	4.70887	5.22172	5.41425	5.97378	6.01829	6.10449	6.5026	6.50981	6.74545	6.36452	6.01528	5.50701	5.02409	4.20296	3.73444	3.38638	2.82457	2.25084	2.01205	1.79585
622.94	0	1.18587	13.1194	8.87327	23.1757	35.1867	33.8145	27.1608	25.9569	25.6585	24.0453	26.1577	30.3	38.2571	60.8961	71.0176	59.3703	35.4039	14.5936	5.63449	2.2231	0	0	0	0	3.50558	3.80505	4.4445	4.3315	4.63981	5.13583	5.17488	5.50492	5.57897	5.82227	6.0751	6.14909	6.42803	6.16886	5.95344	5.16645	4.83751	4.16917	3.62248	3.24287	2.65413	2.20036	1.98743	1.69829
623.97	2.2306	4.82149	14.126	9.07639	20.9603	34.3362	34.0117	25.9711	24.5525	24.1692	23.0549	25.3645	29.6487	36.8607	59.3951	69.6191	57.6726	33.7859	13.8771	5.89571	3.01812	0	0	0	0	3.42654	3.55007	3.90477	4.13069	4.71586	4.90547	4.81807	5.18986	5.36648	5.47265	5.92963	6.09081	6.02756	6.0008	5.68388	5.00137	4.62344	4.00221	3.57127	3.10244	2.61339	2.14442	1.89871	1.70281
625	3.71554	9.37385	9.38253	10.9019	18.9791	33.8289	32.6005	24.655	23.8398	23.4918	22.4103	24.3116	28.4671	36.0895	57.6603	67.6426	56.3259	33.0484	13.7875	5.6355	2.91885	0	0	0	0	3.0799	3.54536	3.82803	3.93307	4.26037	4.7226	4.94191	5.16513	5.33256	5.19568	5.88564	6.158	5.73622	5.77352	5.5322	4.99432	4.4211	3.86812	3.54295	3.03936	2.62224	2.04274	1.83712	1.62898
626.02	1.33463	4.95988	7.90997	14.2511	19.1473	33.1904	30.3931	23.2246	23.5425	23.5454	21.6417	23.3517	27.1664	35.3697	56.6652	66.7723	54.4795	32.2551	13.6559	5.12436	2.66244	0	0	0	0	2.61988	3.42831	4.0096	3.69098	4.24442	4.59858	4.95338	4.92407	5.20458	5.07345	5.62598	6.01763	5.45787	5.58858	5.32116	4.91897	4.29938	3.79539	3.39766	2.94923	2.52462	1.9251	1.75221	1.51584
627.05	0	8.65493	0	9.62195	19.4111	33.4707	28.9199	22.1853	22.6766	22.8528	21.1486	22.5493	26.1527	34.4696	54.7143	64.7619	53.33	31.8411	13.2936	4.86028	2.68584	0	0	0	0	2.42902	3.34395	3.86123	3.6765	4.21634	4.5992	4.87793	4.91935	5.06889	5.06795	5.30954	5.78266	5.21573	5.4669	5.093	4.72905	4.20873	3.74379	3.29789	2.89873	2.42935	1.90574	1.75108	1.46899
627.94	0	9.91912	0	6.41067	20.611	32.7138	28.4193	21.5747	22.013	21.6363	20.0145	21.7727	25.9895	33.6273	53.2686	63.1815	52.1333	30.8445	12.8566	5.00194	3.00512	0	0	0	0	2.48206	3.23139	3.58449	3.89196	4.20322	4.24924	4.60768	4.88537	4.94889	4.97495	5.13531	5.46743	5.05589	5.28585	5.03891	4.40945	4.07286	3.62293	3.15752	2.82335	2.35233	1.93215	1.68724	1.56001
628.97	0	7.00948	0	9.76854	19.5242	30.6423	28.0365	21.6535	21.6821	20.5489	19.7148	21.3836	25.0448	32.7616	51.5189	61.2935	51.5618	30.262	12.4842	4.90997	3.06736	0	0	0	0	2.3973	3.32422	3.36704	3.94732	3.81591	4.06723	4.59328	4.74041	4.66819	4.81064	5.03912	5.26391	4.94826	5.14142	4.97826	4.37286	3.94928	3.53043	3.05215	2.708	2.34666	1.89026	1.59548	1.53239
630	0	6.34278	5.88067	13.2137	20.9948	29.6292	27.9152	21.1217	20.9338	20.1356	19.2107	20.5273	24.0036	31.3604	50.6923	59.3061	49.8524	29.4544	12.1739	4.88606	2.9894	0	0	0	0	2.24683	3.16187	3.39011	3.64264	3.72482	4.0165	4.32331	4.58085	4.54054	4.6034	4.85935	5.03354	4.98742	5.02639	4.71656	4.2173	3.82317	3.41242	2.99392	2.61715	2.20587	1.79422	1.47149	1.41907
631.01	0	10.2498	6.60643	13.2268	19.0747	28.8214	27.1752	19.9596	19.8499	19.2144	18.2419	19.8916	23.6135	29.7923	49.1746	56.9712	48.1089	28.8586	11.5867	4.84274	2.79393	0	0	0	0	1.85571	2.88896	3.37072	3.40849	3.65021	3.82863	4.05311	4.3754	4.30884	4.4392	4.7364	4.82305	4.83502	4.78881	4.46708	4.23047	3.77016	3.25672	2.89457	2.60254	2.12237	1.73614	1.41683	1.31931
632.02	1.03249	8.24467	0	12.8951	19.03	27.4501	25.2285	19.0651	18.9842	18.158	17.7046	19.5412	22.7435	28.7147	47.7829	54.9572	46.3254	27.9034	11.424	4.87305	2.81086	0.263996	0	0	0	1.47406	2.42808	3.49387	3.31737	3.60867	3.47164	3.77955	4.18788	4.33699	4.45149	4.84705	4.6583	4.65848	4.56526	4.36133	4.03496	3.64263	3.14377	2.78728	2.57788	2.00787	1.68055	1.41397	1.33331
633.04	4.18343	6.70194	0	12.6458	20.1389	27.1613	25.0116	18.6086	18.4763	17.5343	17.3339	18.8928	21.5828	28.2014	45.8399	54.0628	45.3598	27.1963	11.0476	4.64486	2.96057	1.10404	0	0	0	0.435585	2.2566	3.37202	3.12038	3.6291	3.40768	3.7987	3.9432	4.08128	4.25701	4.58629	4.48249	4.38076	4.3939	4.24618	3.95907	3.54236	3.00425	2.67534	2.43513	2.02157	1.64783	1.44641	1.34069
634.05	4.42483	1.65232	0.896715	10.9551	18.7965	27.2604	25.0006	18.0329	17.8349	17.4846	16.6792	18.1245	20.6918	27.4741	44.3039	53.2709	43.7479	26.2894	10.7679	4.47896	3.20186	1.4975	0	0	0	0	2.32712	2.98005	2.91407	3.3168	3.53259	3.68351	3.93177	4.1011	4.10008	4.24904	4.23925	4.23625	4.36211	4.03854	3.74269	3.40609	2.94416	2.66355	2.34294	1.97832	1.61921	1.40219	1.28135
635.07	5.51884	0	4.63993	3.55857	13.3495	26.432	24.8405	17.5822	17.438	17.2869	15.2908	17.3896	20.1799	26.7923	43.3306	52.0064	43.3538	26.0575	10.4016	4.62403	2.96385	1.72644	0	0	0	0	2.46487	2.85484	2.94141	3.21036	3.53014	3.45327	3.92231	3.64056	3.76394	4.03857	4.08352	4.05141	4.15262	3.94897	3.56484	3.36968	2.82253	2.57622	2.27967	1.8565	1.55668	1.36906	1.13922
635.94	0.520152	0.368715	8.82393	0	11.082	25.294	22.6289	17.2114	17.6297	16.7007	14.8763	17.2201	19.8642	25.8407	41.9228	49.8931	42.4246	25.5306	9.99291	4.42559	2.8743	1.72869	0	0	0	0	2.31049	2.74379	2.8527	3.22815	3.44463	3.25585	3.73506	3.55639	3.75017	3.91378	4.08024	3.9814	3.97462	3.83355	3.34339	3.13702	2.71211	2.50014	2.17303	1.79116	1.45253	1.32085	1.11066
636.95	0	8.32581	9.98386	3.13896	14.1834	24.5509	21.6961	17.0555	16.5649	15.8235	14.6037	16.4512	19.576	24.8499	40.3756	48.2328	41.0999	24.64	9.55272	4.1888	2.62921	1.74638	0	0	0	0	2.5345	2.45385	2.69486	3.1741	3.22545	3.14638	3.57234	3.38263	3.67755	3.72464	3.95406	3.87989	3.88126	3.82138	3.11408	3.01649	2.60702	2.40916	2.1037	1.80137	1.40289	1.27518	1.10272
637.97	0	4.30687	4.66213	5.5608	15.3593	23.0831	20.8512	16.7066	15.3501	15.223	14.4361	15.6296	19.0164	23.6495	39.1326	46.9824	39.4042	23.4153	9.37256	4.06372	2.68648	1.58	0	0	0	0	2.42095	2.22059	2.58482	2.95684	2.98581	3.27328	3.4602	3.50421	3.79062	3.67062	3.8215	3.6981	3.7065	3.57774	3.08081	2.84503	2.55452	2.31789	2.07945	1.78445	1.38625	1.15104	1.14511
638.98	0	0	1.66555	3.03588	16.2446	22.1909	20.6334	16.0075	14.5022	14.6759	13.713	14.8046	17.4637	22.7491	38.0691	45.5845	38.7857	22.7296	9.22071	4.24801	2.66911	1.72745	0	0	0	0	2.10046	2.25663	2.57131	2.80368	2.9555	3.28709	3.54479	3.26677	3.61934	3.63208	3.6643	3.34665	3.74054	3.33824	3.17796	2.82113	2.53872	2.19188	2.01937	1.69757	1.36789	1.1465	1.10258
640	0	0	12.8063	2.57561	15.7372	21.8716	19.3174	15.2081	14.4211	14.4601	13.2535	14.7265	16.7513	22.288	36.6757	43.9206	37.4899	22.1163	8.93409	4.17322	2.93367	1.84663	0	0	0	0	1.51442	2.34215	2.61062	2.58598	2.95492	3.20639	3.28997	3.11792	3.39931	3.55143	3.43332	3.17947	3.51313	3.21632	3.21555	2.80924	2.44522	2.11945	1.87621	1.68765	1.3409	1.1079	1.12021
641.01	0	5.5864	7.80561	4.49647	11.2946	21.5963	18.4893	14.6347	13.4645	13.9397	12.9628	14.4398	15.934	21.5782	35.2264	42.6344	36.4062	21.4334	8.36117	3.82776	2.77768	1.87351	0	0	0	0	1.31893	2.35925	2.69171	2.46546	2.95587	2.92345	3.13686	2.94591	3.16203	3.28956	3.25345	3.02899	3.42941	3.25753	3.04999	2.7672	2.47287	2.11891	1.76936	1.61412	1.25914	1.07685	0.999191
642.02	0.24515	6.0721	1.35396	6.63621	8.41407	20.0984	17.4694	13.9838	13.0084	13.4246	12.7848	13.6448	15.8544	20.6696	34.5732	41.3629	35.3356	20.9015	8.39764	3.66667	2.63428	1.96931	0.234428	0	0	0	0.79937	2.33056	2.57093	2.49403	2.82082	2.78128	2.87772	2.95261	3.11446	3.12502	3.0478	3.10881	3.26559	3.21454	2.87834	2.67269	2.32666	2.0682	1.76397	1.50427	1.20426	1.02098	0.920863
643.04	5.88706	3.63485	0	5.57316	9.65716	19.3495	16.8682	13.3936	12.5172	12.4537	12.2552	12.9188	15.1088	20.0059	33.1833	40.5028	34.4672	20.6968	8.10555	3.6468	2.58708	2.06904	0.685522	0	0	0	0	2.3498	2.48895	2.53501	2.64038	2.86369	2.77288	2.89878	3.04204	2.87597	2.97941	2.98892	3.16987	3.0362	2.80485	2.49125	2.18227	1.86631	1.74023	1.47249	1.15557	1.02619	0.870524
644.05	2.93834	4.36295	0	5.80696	9.79375	16.8713	16.1128	12.5282	12.4812	12.1108	11.5532	12.5782	14.8146	19.8072	32.2133	38.6895	32.885	19.9286	7.86609	3.67707	2.66578	1.95951	0.89648	0	0	0	0	1.98682	2.50833	2.28863	2.35483	2.93482	2.6566	2.75834	2.82499	2.87363	2.98814	2.88344	3.02266	2.95572	2.72389	2.32018	1.9955	1.75661	1.71606	1.49159	1.17186	0.956748	0.943702
645.07	8.89977	4.32793	0	0.159571	7.09106	17.3051	15.3843	12.3532	12.2915	11.8782	10.758	12.2447	14.1038	19.2854	31.091	37.0088	32.031	19.1924	7.42525	3.48396	2.60209	1.83258	1.02609	0	0	0	0	1.74507	2.39908	2.23324	2.17658	2.82542	2.63767	2.70335	2.79771	2.89927	3.07944	2.79146	3.012	2.7065	2.49285	2.26147	2.07	1.70905	1.64763	1.40565	1.09837	0.920962	0.892002
645.94	7.76788	1.42873	5.08691	0	9.09043	17.2943	14.5265	11.5886	12.0696	11.4934	10.2712	11.558	13.7327	18.0887	30.1631	35.25	30.5294	18.7744	7.22264	3.26222	2.51468	1.75836	1.29527	0	0	0	0	1.32121	1.96419	2.16439	2.18733	2.56187	2.52576	2.72873	2.75354	2.92084	2.86641	2.76047	2.98114	2.64806	2.34491	2.30119	1.96924	1.7781	1.59175	1.27557	1.06558	0.904493	0.832939
646.95	10.3433	0	3.1894	0	10.0883	17.8954	13.3729	11.0742	11.1797	10.9558	9.82377	11.0966	12.9123	16.9229	28.6106	34.867	29.6648	18.4108	7.01884	3.27705	2.5183	1.73897	1.19451	0	0	0	0	1.43283	1.69858	2.3914	2.18384	2.4996	2.52	2.59634	2.73317	2.7605	2.63015	2.66919	2.85356	2.56653	2.32505	2.21802	1.86595	1.71949	1.48919	1.21376	1.03234	0.870604	0.774123
647.97	8.68587	3.7087	2.76108	0.567971	10.0144	15.1931	12.9694	11.0437	10.6219	10.8435	9.52122	10.7498	12.7305	16.5564	27.633	33.6954	28.7755	17.6923	6.97308	3.17486	2.58559	1.74633	1.06249	0	0	0	0	1.42448	1.70278	2.25695	2.19451	2.36965	2.46557	2.40216	2.55868	2.67289	2.42829	2.59904	2.76621	2.55818	2.35232	2.07121	1.84351	1.6781	1.45193	1.21066	1.06498	0.819833	0.790477
[truncated: 22 more columns]

## Sheet: 0,22 um
Wave	200	205	210	215	220	225	230	235	240	245	250	255	260	265	270	275	280	285	290	295	300	305	310	315	320	325	330	335	340	345	350	355	360	365	370	375	380	385	390	395	400	405	410	415	420	425	430	435	440
252.03	0	0	0	0	0	0	0	0	0	0	0	0	0	0	0	0	0	0	0	0	0	0	0.114955	0	0	0.0575854	0	0.204989	0	0	0	0	0.168618	0.0779625	0.155924	0.223846	0.302515	0.192362	0.122321	0.104915	0.0104658	0	0	0	0.0726386	0.0163058	0.0340619	0.00572588	0.00739384
252.96	0	0	0	0	0	0	0	0	0	0	0	0	0	0	0	0	0	0	0	0	0	0	0.0326584	0	0	0.0620336	0	0.0019645	0	0.0527243	0.108414	0.190985	0.159929	0.0400786	0.19751	0.142303	0.304104	0.146663	0.0983559	0	0.0323294	0.0157903	0	0	0.0448714	0	0.0107476	0	0
254.06	0	0	0	0	0.688054	0	0	0	0	0	0	0	0	0	0	0	0	4.69884e-05	0	0	0	0	0	0	0	0.131074	0.00945368	0	0.0619638	0.164342	0.163273	0.18336	0.194256	0.0301521	0.291554	0.132056	0.297427	0.0986608	0.133614	0.0142994	0.0446212	0.0054301	0	0	0.00912505	0	0	0.0134849	0
255	0	0	0	0	0	0	0	0	0	0	0	0	0	0	0	0	0	0	0	0	0	0	0	0.0530399	0	0	0.087537	0	0.244417	0.128412	0.223096	0.095372	0.214488	0.142961	0.150077	0.10098	0.217241	0.133175	0.184446	0.0912489	0.0241232	0	0.0136763	0	0.00309624	0	0	0	0.0404731
255.93	0	0	0	0	0	0	0	0	0	0	0	0	0	0	0	0	0	0	0	0	0	0	0.082676	0.21148	0	0	0	0.069209	0.0778872	0.0568863	0.1923	0.035908	0.0990503	0.156003	0.097141	0.195756	0.0966364	0.233941	0.163528	0.154711	0.0829757	0	0	0	0.0243859	0.0110459	0.00140519	0.00126074	0.0346708
257.03	0	0	0	0	0	0	0	0	0	0	0	0	0	0	0	0	0	0	0	0	0	0	0	0.0972268	0	0	0	0.220093	0	0.0218616	0.242689	0.169866	0.0233389	0.0357833	0.0392462	0.342524	0	0.164135	0.0928641	0.161252	0.0804983	0.00870927	0	0	0.010251	0	0.029466	0.00107646	0
257.96	0	1.96109	0	1.9571	0	0	0	0	0	0	0	0	0	0	0	0	0	0	0	0	0	0	0	0	0	0	0	0.196024	0	0.0861448	0.116632	0.177332	0.0259806	0	0.106003	0.334576	0.133148	0.102697	0.137222	0.141302	0.0445531	0	0	0	0	0	0.00142398	0	0
259.06	0	0	0	0	0	0	0	0	0	0	0	0	0	0	0	0	0	0	0	0	0	0	0	0	0	0	0	0	0	0	0.00626816	0.134708	0.0895879	0.0617248	0.0784484	0.166996	0.243069	0.0454498	0.127813	0.0489172	0	0	0	0	0	0	0	0	0
260	0	0	0	0	0	0	0	0	0	0	0	0	0	0	0	0	0	0	0	0	0	0	0	0	0	0	0	0	0.00475193	0.0859308	0	0.0165777	0.0868509	0.0214181	0.203064	0.0586884	0.23835	0.162646	0.158963	0.0779277	0.00231535	0	0	0	0.0288295	0.0169068	0.0142501	0	0.0157588
260.93	0	0	0	0	0	0	0	0	0	0	0	0	0	0	0	0	0	0	0	0	0	0	0	0	0	0	0	0	0.021561	0.151575	0	0	0.0320835	0	0.274577	0.0748105	0.233023	0.0960829	0.169359	0.061234	0.0724243	0	0	0	0.0412163	0.0297376	0.0179409	0	0.00485234
262.03	0	0	0	0	0	0	0	0	0	0	0	0	0	0	0	0	0	0	0	0	0	0	0	0	0.00359444	0	0	0	0	0.0212311	0	0	0.0146019	0.0657413	0.273608	0.0946664	0.278262	0.0812793	0.165675	0	0.173865	0.0198493	0.0707414	0.00671911	0	0.020452	0.0197584	0.0449005	0
262.96	0	0	0	0	0	0	0	0	0	0	0	0	0	0	0	0	0	0	0	0	0	0	0	0	0.176967	0.0141669	0	0	0	0.0303661	0	0.0484466	0	0.139893	0.165779	0	0.152555	0.0777146	0.0950885	0.0477908	0.0953414	0.0274112	0	0.0228946	0	0	0	0.0447347	0
264.06	0	0	0	0	0	0	0	0	0	0	0	0	0	0	0	0	0	0	0	0	0	0	0	0	0	0	0	0	0	0	0.118927	0.064993	0.0540039	0.0386803	0.11535	0	0.0888618	0.0925127	0.0912163	0.1457	0.0400936	0.0365051	0	0	0	0	0	0.00276226	0.00834157
265	0	0	0	0	0	0	0.547201	0	0	0	1.47406	0	0	0	0	0	0	0	0	0	0	0	0	0	0	0	0	0.00651394	0.00749489	0	0.0835833	0.129964	0.0452169	0	0.117899	0.204769	0.0722531	0.111788	0.0645011	0.209542	0.0471444	0	0	0	0.0198959	0	0	0	0.00566883
265.93	0	0	0	1.39637	0.957008	0.703489	2.31906	1.93325	0.382079	1.28474	3.6023	0	0	0	0	0	0	0	0	0	0	0	0	0	0	0	0	0	0.0569145	0	0.0535569	0.116448	0.0916694	0	0.239249	0.240337	0.100899	0.110007	0.0982846	0.116851	0.0347765	0	0	0	0	0	0.00474771	0	0.0564867
267.03	0	0	0	2.96258	3.05568	2.88129	4.54577	5.57748	4.29282	5.43312	6.9143	5.22187	0	0	0	0	0	0	0	0	0	0	0	0	0	0	0.0210697	0	0.0284959	0	0.0943493	0	0.129582	0	0.297452	0.153241	0.019716	0.147033	0.167623	0.0632218	0	0	0	0	0	0	0	0	0.0270063
267.96	0	0	0	0.168187	5.37375	5.22927	7.48563	10.359	12.0679	12.2802	13.0707	15.0576	0	0	0	0	0	0	0	0	0	0	0	0	0.0424321	0.116276	0.227754	0	0	0	0.0725038	0	0.0807316	0	0.31858	0	0	0.123212	0.185364	0	0	0	0	0	0.0146928	0	0	0.0193709	0.0184984
269.06	0	0	0	0	6.26626	8.66551	10.4337	15.8177	21.0076	21.2899	21.5499	24.8735	0	0	0	0	0	0	0	0	0	0	0	0.166227	0	0	0.0508716	0	0	0.0116156	0.0121378	0	0.0231538	0	0.187177	0	0	0.121528	0.0976724	0	0.0628203	0	0	0	0.00629305	0	0	0	0
270	0	0	0	0	9.15467	12.3523	15.0037	22.3837	33.5539	32.6252	31.6738	37.0815	17.4889	0	0	0	0	0	0	0	0	0	0	0.0297583	0	0	0	0	0	0	0.0942259	0	0	0	0.139046	0.104537	0.0246711	0.0892762	0.067272	0.0576039	0.0526951	0	0	0	0.00155865	0	0	0	0
270.93	0	0	0	3.67723	14.4906	16.3412	21.908	31.9365	47.419	47.3857	44.5105	50.9337	45.1938	0	0	0	0	0	0	0	0	0	0	0.00539745	0.0417297	0	0	0	0	0	0.0268278	0	0.0878543	0	0.08835	0.236394	0.0727497	0	0.138473	0.0738847	0.0103649	0	0	0	0.0277362	0	0	0	0
272.03	0	6.39315	0	11.82	21.7058	21.579	28.2089	41.6527	63.7161	64.0906	59.4882	65.8662	68.7927	0	0	0	0	0	0	0	0	0	0	0	0.236755	0.00436748	0.0721925	0.0197887	0	0	0	0.0255169	0.0528394	0.0484009	0.141131	0.155387	0.0620595	0	0.177538	0.0181674	0.0608228	0	0	0	0.0158402	0	0	0	0.0141656
272.96	0	11.0642	12.4408	19.4888	25.2604	27.3835	34.0509	51.3474	78.1848	80.3201	75.1815	80.3307	86.6897	0	0	0	0	0	0	0	0	0	0	0	0.269112	0.0231945	0.193576	0.367945	0	0	0	0.0667428	0.0700516	0.133842	0.0499867	0.132521	0.0461957	0	0.192692	0	0	0.00288124	0	0	0.008069	0	0	0	0
274.06	0	16.0298	21.8125	21.7241	29.2079	31.8747	38.9172	58.9541	90.8582	93.2318	87.981	93.4601	100.513	30.594	0	0	0	0	0	0	0	0	0	0	0.0880035	0	0.194841	0.392021	0.116165	0.0149221	0	0.132875	0.0351391	0.115721	0.00258499	0.105997	0.105765	0.0013892	0.173342	0	0	0	0	0	0	0	0	0	0
275	5.76669	16.3534	24.9243	23.7816	30.5041	36.2836	44.683	66.6159	99.7406	105.639	99.7429	106.051	113.715	68.5259	0	0	0	0	0	0	0	0	0	0	0.312036	0	0.194668	0.149851	0.0114882	0	0.00662046	0.0692522	0.116025	0.112061	0	0	0.0963845	0.0381741	0.16521	0.017729	0	0	0	0	0	0.00170492	0	0	0.000234909
275.93	14.9262	20.3055	31.5451	26.6979	33.2549	39.6517	48.8708	73.1737	108.724	118.148	111.272	116.905	123.688	90.9633	0	0	0	0	0	0	0	0	0	0	0.233034	0.111892	0	0.12519	0.118045	0	0.116109	0	0.142062	0.142001	0.147704	0	0.0600803	0.0196761	0.120253	0.0464189	0.11459	0	0	0	0	0	0	0	0.0148222
277.03	2.17806	16.7117	39.108	33.4444	37.3092	45.5925	52.7338	80.1175	117.615	130.318	120.921	127.523	134.264	108.238	0	0	0	0	0	0	0	0	0	0	0.235627	0.0847946	0.189241	0.278634	0.0453229	0	0	0	0.0834868	0.202242	0.190986	0	0.0124517	0.00576608	0.0786995	0.0196924	0.108553	0	0	0	0	0	0	0	0
277.96	10.8494	22.2091	41.5776	41.4801	44.95	49.5622	57.2666	86.6919	129.145	142.081	132.192	140.236	148.292	122.838	0	0	0	0	0	0	0	0	0	0.104803	0.0894791	0	0.399487	0.441332	0.171291	0.208807	0	0	0.078695	0.227354	0.0701141	0.107953	0	0.0414663	0.099554	0	0.0353404	0	0	0	0.00251207	0	0.0143439	0	0
279.06	16.2414	19.6128	29.1369	47.9214	51.224	55.4758	62.6344	94.3105	141.419	153.255	143.852	152.408	160.566	133.83	38.8829	0	0	0	0	0	0	0	0	0.162447	0.328344	0.29077	0.254889	0.558849	0.0851349	0.198947	0	0.0880608	0.072206	0.104753	0	0.142605	0.030629	0.133989	0.13142	0.036025	0.0129702	0	0	0	0	0	0.00567978	0	0
280	24.4949	22.0698	33.8801	57.7576	55.454	59.8741	68.9333	101.643	150.924	163.055	155.09	162.518	171.248	142.919	71.8234	0	0	0	0	0	0	0	0	0.143563	0.262349	0.590903	0.0597949	0.510999	0.231729	0.0981678	0.0675062	0.131217	0.0742564	0	0.136626	0.154697	0.118921	0.137825	0.124657	0.0156057	0	0	0	0	0	0	0	0.00736093	0
280.93	27.7518	21.6104	36.2473	62.2504	59.9443	64.3035	74.165	106.624	157.94	170.202	160.627	167.515	179.583	151.809	91.8893	0	0	0	0	0	0	0	0.0221845	0.176867	0.10785	0.334727	0.0890949	0.429054	0.379168	0.0413587	0	0.115776	0.0393651	0.000425647	0.260882	0.145633	0.152741	0.116671	0.0709246	0.00898175	0	0	0	0	0	0	0	0.016113	0
282.03	31.9784	23.2685	42.7467	63.8582	61.5168	67.077	78.6697	109.688	160.783	175.851	165.126	173.223	184.063	159.287	107.252	0	0	0	0	0	0	0	0.146618	0.121344	0.124335	0	0.295342	0.242113	0.436064	0.318673	0.090908	0	0.0914254	0.13103	0.227175	0.174286	0.18772	0.176554	0.0549993	0.069883	0	0	0	0	0	0	0.0145979	0.033404	0
282.96	29.2378	21.0422	41.1773	54.5266	62.9125	71.0261	81.9065	114.507	163.484	179.177	170.096	174.707	186.053	163.733	118.04	0	0	0	0	0	0	0	0	0.0219476	0.104765	0.187573	0.375299	0.0648481	0.201747	0.279694	0.296413	0	0.0784519	0.161266	0.204094	0.183006	0.0920838	0.121685	0.0123517	0.136685	0.0233487	0.0021909	0	0	0.0177668	0	0.00101638	0	0.0366677
284.06	22.0933	23.2998	42.7747	51.4528	63.0353	73.8449	86.3412	116.262	163.915	177.776	172.875	177.377	186.667	166.396	125.332	18.3688	0	0	0	0	0	0	0	0	0.0991017	0.28524	0.470244	0.103981	0.0406192	0.147343	0.267092	0.0357176	0	0.138943	0.145477	0.219738	0.0557727	0.0895001	0.044251	0.0628682	0	0	0	0	0.028833	0.00198487	0	0	0.0083175
285	23.2717	35.1291	39.8053	51.9335	65.9643	78.7693	89.6876	115.536	167.173	177.549	173.909	176.865	188.95	170.086	133.692	54.3297	0	0	0	0	0	0	0	0	0.0570077	0.399884	0.540574	0.170528	0.216996	0	0.282008	0.085799	0	0.138998	0	0.201949	0.0452106	0.0830858	0.07788	0.0458625	0.0268343	0	0	0	0.011402	0	0	0	0
285.93	23.6976	35.8017	34.3362	63.8098	67.3684	86.0761	92.0083	116.284	170.565	180.987	174.809	181.354	191.027	172.242	141.691	79.9352	0	0	0	0	0	0	0	0	0.158588	0.45349	0.374537	0.292574	0.318182	0.100986	0.3101	0.331096	0	0.271166	0	0.182994	0.249685	0.129174	0.154391	0.142157	0.00148636	0	0	0	0.0234876	0.0176757	0.03091	0	0
287.03	28.1563	31.3598	41.1566	63.9049	72.9113	93.833	97.1465	120.278	172.995	185.44	176.638	182.891	195.462	176.19	151.847	102.058	0	0	0	0	0	0	0	0	0.0788851	0.419949	0.299595	0.200125	0.331302	0.22244	0.463312	0.363333	0.213115	0.143112	0.014798	0.168095	0.223362	0.0473859	0.0997149	0.190202	0.0820719	0	0	0	0.000323412	0.0303502	0.0310904	0.00862833	0.0171798
287.96	36.4987	32.3879	42.1052	60.5061	79.1155	98.7214	104.359	125.061	173.926	185.892	177.339	186.743	197.806	182.057	162.448	119.425	0	0	0	0	0	0	0	0	0.0396228	0	0.271507	0.361631	0.221549	0.301176	0.352909	0.329719	0.25267	0.0306646	0.0631032	0.26154	0.130317	0.0752917	0.0753503	0.11571	0.00716434	0	0	0	0	0.025271	0.0346062	3.75832e-05	0.0322938
289.06	29.8998	33.3757	49.6808	59.1695	85.2988	102.885	110.44	126.206	172.115	186.14	179.237	188.077	198.809	187.161	173.359	133.217	19.3093	0	0	0	0	0	0	0	0	0	0.544315	0.314034	0.321322	0.350113	0.244768	0.266444	0.173179	0.0389313	0.117159	0.322947	0.0927947	0.104934	0.00803369	0.00192602	0.00369865	0	0	0	0	0.0124073	0.000439635	0.00899428	0
290	26.6848	34.2514	45.5622	62.8741	85.6413	107.277	112.1	127.741	172.364	186.66	179.719	190.362	199.637	188.782	180.299	146.142	67.219	0	0	0	0	0	0	0	0.162058	0.15062	0.515022	0.472414	0.344908	0.523765	0.291843	0.313887	0.120231	0.182525	0.166122	0.191354	0.207137	0.093437	0.0512313	0.0376196	0	0	0	0	0	0	0	0	0
290.93	30.7821	40.9077	49.7736	60.2248	88.395	114.112	114.581	127.182	171.552	182.021	175.411	187.083	198.083	188.752	186.258	158.884	96.5853	0	0	0	0	0	0	0	0.246345	0.198638	0.414766	0.401464	0.439634	0.423789	0.383475	0.121909	0.197504	0.165482	0.189853	0.123977	0.161034	0.0816008	0.084361	0.0678511	0.0276694	0	0	0	0	0.00525005	0	0	0
292.03	32.8969	51.6465	42.0614	59.1925	90.374	119.519	118.526	128.012	168.738	176.286	168.714	181.878	193.83	187.379	192.172	170.702	118.333	0	0	0	0	0	0	0	0.308257	0	0.0641302	0.4825	0.462036	0.296932	0.465129	0.0784484	0.204133	0.168085	0.137688	0.161786	0.0402024	0.0561695	0.157547	0.0672796	0	0	0	0	0	0.0217937	0.0400562	0	0.0506957
292.96	28.0772	54.0874	43.3024	59.1822	91.7853	125.09	121.909	126.316	162.969	171.051	163.615	176.428	189.295	187.068	199.433	183.565	133.199	0	0	0	0	0	0	0	0	0.0383756	0.140216	0.16739	0.536443	0.157114	0.45873	0.210827	0.146145	0.207705	0.201479	0.182117	0	0.170592	0.179962	0.0559401	0	0	0	0	0	0.00259624	0.0286389	0	0
294.06	37.604	52.1919	40.9336	59.0394	90.1068	124.862	122.619	125.473	157.316	167.309	159.076	172.723	186.156	186.07	204.988	193.901	143.55	17.0149	0	0	0	0	0	0	0	0.0269658	0.299706	0.0996094	0.457978	0.158027	0.450489	0.1682	0.250256	0.23082	0.163207	0.127459	0.0534649	0.174355	0.206359	0.0706805	0	0	0	0	0	0	0	0	0
295	37.3303	46.8503	46.0398	53.9497	90.1175	126.314	123.657	123.775	153.538	162.001	155.828	168.818	182.643	184.928	209.306	202.578	152.669	52.2688	0	0	0	0	0	0	0	0	0.251401	0	0.242373	0.122885	0.18831	0.109768	0.235004	0.180448	0.12634	0.166161	0.0545564	0.196095	0.174358	0.0762391	0	0	0	0	0	0	0	0	0
295.93	23.8297	40.6068	39.5635	51.3421	93.5964	127.422	125.756	122.816	150.64	157.985	151.99	162.735	177.199	181.505	211.76	210.224	160.596	71.951	0	0	0	0	0	0	0	0	0.23765	0.199519	0.170182	0.138355	0.260918	0	0.154857	0.168552	0.0372361	0.130751	0	0.101237	0.142666	0.0188744	0	0	0	0	0	0	0	0	0
297.03	21.5072	40.3613	35.2535	46.1211	93.9235	132.585	127.567	121.96	146.131	152.957	147.351	157.133	172.871	178.71	214.628	217.643	169.521	85.8048	0	0	0	0	0	0	0	0	0.200149	0.0958687	0.19233	0.0588722	0.445456	0.116669	0.0497925	0.212592	0	0	0	0.0689623	0.0869953	0	0	0	0	0	0	0	0	0.000408325	0
297.96	22.7985	43.3695	37.5174	44.8968	93.7624	133.651	129.76	119.898	139.301	147.427	142.321	152.673	168.747	177.141	217.266	222.649	177.368	92.3409	0	0	0	0	0	0	0	0	0	0.0781403	0.281427	0.207554	0.239673	0.233018	0.161975	0.217141	0	0	0.00410991	0.00934689	0.077349	0.0843711	0.055624	0	0	0	0	0	0	0.0720584	0
299.06	20.5218	39.4262	40.4391	47.638	95.9723	137.345	131.453	117.303	135.144	143.075	138.854	149.057	164.633	176.777	219.175	227.011	182.124	95.6045	0	0	0	0	0	0	0	0	0	0.000120819	0.157259	0.347374	0	0.454725	0.109186	0.157654	0	0.00742347	0.124738	0.041661	0.0768996	0.0960032	0.0933595	0	0	0	0	0	0.0123364	0.052113	0
300	18.3561	36.8481	39.934	50.2027	100.545	140.494	131.594	114.428	133.848	139.288	133.871	143.126	158.958	174.504	217.551	229.926	185.576	98.5014	0	0	0	0	0	0	0	0	0.00217776	0.0727946	0.101797	0.295327	0.145129	0.265607	0.0913673	0.19737	0.0616039	0.126002	0.113669	0.08324	0.0732463	0.0546197	0.0335245	0	0	0	0	0	0.0255076	0	0
301.07	29.589	34.5126	44.432	49.0422	102.657	140.753	130.253	111.53	128.228	134.085	128.514	137.817	154.545	170.014	217.292	234.056	187.998	101.007	15.8604	0	0	0	0	0	0	0	0.0596109	0.158346	0.0257392	0.249767	0.478688	0.221269	0.140953	0.263707	0.101761	0.119239	0.0904611	0.0343449	0.0288379	0	0	0	0	0	0	0	0	0	0
302	30.4819	33.1344	45.5208	49.8652	94.5826	137.783	130.785	110.161	123.152	128.444	122.841	132.607	148.262	164.939	218.814	235.959	190.798	104.051	27.3551	0	0	0	0	0	0	0	0.00433447	0.105594	0.108353	0.338482	0.423846	0.212941	0.233967	0.245792	0.192547	0.0397458	0	0.0489499	0.0164757	0	0	0	0	0	0	0	0.00646678	0	0
303.07	32.2502	31.3598	39.323	55.1403	90.8815	136.979	130.155	107.447	118.221	123.035	118.292	127.322	142.294	160.144	221.011	237.711	192.127	106.066	30.6318	0	0	0	0	0	0	0	0.0521011	0.309553	0.194661	0.341905	0.328931	0.262319	0.192576	0.306216	0.0571441	0.106853	0	0.11002	0.0562746	0	0	0	0	0	0	0	0.00207113	0	0
304	25.6396	31.218	33.3773	55.5916	92.51	137.738	128.694	104.878	114.528	117.154	113.371	121.171	137.495	155.688	218.236	236.872	192.983	106.645	31.5407	0	0	0	0	0	0	0	0.162181	0.370244	0.321444	0.224439	0.304531	0.143538	0.180056	0.238768	0	0.204368	0	0.121676	0.0433693	0	0	0	0	0	0	0	0	0	0
305.07	25.8588	33.9822	29.7034	51.4035	93.0444	136.452	126.181	101.874	108.482	112.722	107.815	116.708	133.252	152.309	214.369	236.809	192.41	106.309	31.8963	0	0	0	0	0	0	0	0.0423782	0.29277	0.231909	0.310761	0.292468	0.194442	0.197275	0.221626	0.0546099	0.145099	0.0854381	0.0698872	0.037458	0	0	0	0	0	0	0	0	0.00515916	0
306	19.6918	37.4984	25.7427	47.4641	90.6545	135.232	125.211	99.5023	104.764	108.816	103.017	114.454	127.237	149.062	211.362	236.142	192.734	106.897	32.2994	0	0	0	0	0	0	0	0	0	0.0769759	0.215944	0.170677	0.237166	0.167057	0.239712	0.235731	0.0686099	0.115856	0.121153	0.0765314	0	0	0	0	0	0	0	0	0.0567907	0
307.07	26.8175	29.4339	31.7391	44.6964	90.746	132.998	122.095	96.4273	101.801	104.641	98.7972	109.385	121.776	145.511	208.289	235.756	191.543	106.492	32.4561	0.970206	0	0	0	0	0	0	0	0	0	0.160833	0.156758	0.272323	0.196394	0.26574	0.194067	0.149671	0.0288875	0.127328	0.119846	0	0	0	0	0	0	0	0	0.0616238	0.00383055
308	29.2596	23.7235	33.1197	43.5014	91.8252	129.501	119.313	94.1534	98.2996	99.1621	95.2403	103.785	117.755	140.655	203.818	233.193	189.399	105.157	32.5607	3.52539	0	0	0	0	0	0	0	0	0.156861	0.0696213	0.0688521	0.263241	0.11539	0.121377	0.115201	0.136586	0.00679202	0.099675	0.122575	0	0	0	0	0	0	0	0	0.0458836	0
309.07	36.9708	28.1593	24.9187	45.3622	88.0418	125.871	117.369	92.5413	95.233	96.2241	91.9003	99.0741	114.584	136.572	201.089	229.541	187.019	103.856	32.3441	4.17702	0	0	0	0	0	0	0	0	0.0967461	0.186051	0	0.215707	0.0791776	0.118647	0.0767007	0.0569397	0.109263	0.0810473	0.105017	0.0128656	0	0	0	0	0	0.00673596	0	0	0
310	33.9684	24.1232	19.0588	44.9153	82.1368	124.982	116.343	90.5938	92.4691	93.1269	89.3475	97.2508	110.622	133.175	200.094	227.39	185.17	102.521	32.4969	4.66283	0	0	0	0	0	0	0	0.0297439	0	0.0687441	0	0.151824	0	0.156881	0.126569	0.0797162	0.163418	0.0689	0.0214554	0	0	0	0	0	0	0.011462	0.0130895	0	0
310.93	22.0472	21.5195	20.2669	39.8177	78.5632	124.399	112.341	87.6368	89.7521	89.4064	85.4819	94.1109	107.056	130.796	195.027	223.647	181.926	100.94	32.5526	4.84761	0	0	0	0	0	0	0	0	0	0	0.159768	0	0.0702741	0.0751356	0.125516	0.162138	0.0606389	0	0	0	0	0	0	0	0	0	0	0	0
312.03	6.43208	21.7123	20.4386	35.5643	75.7863	121.945	109.569	84.8821	85.0558	85.7329	81.603	90.6196	103.446	125.963	188.006	217.895	177.347	99.4471	32.5093	5.02659	0	0	0	0	0	0	0	0	0	0	0.193775	0.0466636	0.0115298	0.139923	0.13433	0.0828376	0	0.00242661	0	0	0	0	0	0	0	0	0.00257896	0	0
312.96	2.45436	20.4304	15.6652	34.0146	74.3397	116.866	105.721	80.8187	80.7776	82.2868	78.885	86.2861	99.8368	121.247	182.773	212.045	172.915	97.4469	32.0149	5.35537	0	0	0	0	0	0	0	0	0	0	0.105283	0.0997447	0	0.146114	0.0233244	0.0612377	0	0.103213	0.0119172	0	0	0	0	0	0	0	0.0096568	0	0.000774461
314.06	14.4804	14.6433	12.7849	33.9875	74.6067	112.823	105.718	77.855	78.6723	79.5816	76.4924	83.5072	95.968	116.714	180.119	207.504	169.878	94.5983	31.2727	5.72482	0.392303	0	0	0	0	0	0	0	0	0.0549139	0.0384533	0.148711	0	0.108288	0	0.102561	0.0890188	0.117738	0.00302462	0	0	0	0	0	0	0.00773757	0.0374444	0	0
315	19.2769	20.2856	13.2741	25.9506	75.9916	109.829	103.814	76.3986	76.2986	77.0247	73.6688	80.7665	93.1736	114.428	175.651	202.128	167.385	92.3577	30.5598	5.97124	0.937935	0	0	0	0	0	0	0	0	0.27722	0.127695	0.0241927	0.004067	0.0254906	0	0.136904	0.0741309	0.033914	0.0214643	0.0191681	0	0	0	0	0	0	0	0	0
315.93	17.1567	22.6019	18.7718	20.3156	72.8501	107.432	99.8549	75.9572	72.8804	75.3271	71.5132	77.8147	90.3754	110.232	169.727	198.026	163.62	89.8816	29.7062	6.14834	1.13935	0	0	0	0	0	0	0	0	0.229981	0.0573362	0	0.0973792	0.10116	0.0752561	0.0881146	0.0455093	0	0	0.122921	0	0	0	0	0	0	0.00418123	0	0
317.03	6.22436	15.0405	20.7558	22.6144	65.2605	102.419	95.1342	73.2415	69.3553	72.4594	68.878	74.6391	86.8693	105.853	164.479	193.44	158.268	88.0541	28.9222	6.63426	1.30497	0	0	0	0	0	0	0	0	0	0	0.00900305	0.147127	0.173003	0.0984675	0.127417	0.105053	0	0.0169489	0.100532	0	0	0	0	0	0.00999949	0	0.0270923	0
317.96	10.1256	15.4305	24.7534	32.126	65.3794	99.1527	91.4722	68.7429	67.4231	69.675	65.5616	71.5166	83.0483	102.009	158.329	186.054	153.069	85.9809	27.7215	6.68052	1.91572	0	0	0	0	0	0	0	0	0	0	0.102875	0.212367	0.201142	0.0194794	0.120114	0.101368	0.025662	0.0742203	0.0472476	0	0	0	0	0	0.0109782	0	0.0219351	0
319.06	13.5469	16.5336	26.0421	29.6348	67.7684	96.7354	87.8853	64.8649	66.0331	66.3495	62.5954	68.4911	79.8121	98.6999	153.403	178.489	149.527	83.6948	27.1484	6.63271	2.33644	0	0	0	0	0	0	0	0	0	0	0.0837781	0.0511955	0.139219	0	0.105666	0.00327294	0.0423223	0.0693857	0.0285609	0	0	0	0	0	0	0	0	0
320	16.9272	19.9375	26.2529	22.4899	63.8882	93.8353	83.3079	62.5845	64.9674	64.0802	61.7443	66.2374	76.3334	95.4726	147.654	173.046	145.774	81.2515	26.533	6.5798	2.84202	0.613636	0	0	0	0	0	0	0	0	0	0	0	0.00315077	0.00305197	0	0.00619202	0.0282952	0	0.000474071	0	0	0	0	0	0	0	0	0
320.93	8.33212	18.8147	23.3511	20.4977	57.7452	88.1379	80.2652	60.9948	61.8929	61.5207	60.4103	64.1205	73.2942	91.6331	142.112	168.035	140.819	79.7701	26.1585	6.8099	3.16829	0.952959	0	0	0	0	0	0	0	0	0	0	0	0	0.0397846	0	0.122935	0.0098246	0	0	0	0	0	0	0	0	0	0	0
322.03	9.85259	16.8744	25.9605	15.6662	53.5757	83.4893	75.9364	58.9168	58.6421	58.8304	57.1583	60.6873	69.9955	88.3502	136.168	161.07	134.541	77.9728	25.6434	7.17276	3.64482	1.40871	0	0	0	0	0	0	0	0	0	0	0	0	0	0	0.107016	0	0.0185977	0	0	0	0	0	0	0	0	0	0.0012322
322.96	11.9793	11.0094	20.6495	11.374	52.7202	78.8927	72.1901	55.6445	55.2794	56.0822	53.5086	58.1663	66.3531	83.7613	130.956	154.094	129.973	74.6659	25.686	7.27417	4.09806	1.67981	0	0	0	0	0	0	0	0	0	0	0	0	0	0.00572333	0.0532435	0.0293851	0.128943	0	0	0	0	0	0	0	0.00298662	0	0
324.06	12.6964	7.45763	19.3396	4.49286	47.6668	73.0114	68.7355	53.3861	53.3618	54.1125	50.7847	56.2001	63.6259	80.4583	125.828	148.445	125.437	72.4576	25.4552	7.28075	4.46141	2.2667	0.249293	0	0	0	0	0	0	0	0	0	0.0503425	0	0	0	0	0.0841714	0	0	0	0	0	0	0	0	0.00890203	0	0
325	9.5763	6.34431	14.2497	9.60621	44.1094	68.5869	65.9108	50.9294	51.1492	52.4357	49.6035	54.5353	61.8116	77.5238	121.239	143.117	121.894	71.0723	24.858	7.33217	4.63028	2.58029	1.01307	0	0	0	0	0	0	0	0	0	0	0	0	0	0	0.0724935	0	0	0	0	0	0	0	0	0	0	0
325.93	3.90953	7.55233	8.92836	11.3453	38.0527	65.2728	62.4993	49.5222	49.3348	50.4404	47.5917	51.7663	59.7365	74.9024	117.001	137.698	116.886	69.6304	24.8194	7.56461	4.9588	3.09664	1.47132	0	0	0	0	0	0	0	0	0	0	0	0	0	2.12044e-05	0	0	0	0	0	0	0	0	0	0	0	0
327.03	5.00425	9.06327	4.06312	21.7821	35.2467	63.8938	60.82	47.2243	47.1987	48.3836	45.8384	49.4456	56.7153	71.3699	113.02	132.133	112.206	66.6825	25.493	8.21578	5.33109	3.27492	2.03899	0	0	0	0	0	0	0	0	0	0	0	0.0368059	0	0.120511	0.0263552	0.00074559	0	0	0	0	0	0	0	0	0	0
327.96	7.07268	6.99687	8.56388	15.2067	35.4722	60.5881	56.8728	45.297	44.9094	46.3967	43.1134	46.9484	54.1033	67.679	108.521	126.029	107.348	64.4618	26.2479	8.93683	5.56813	3.94217	2.53241	0	0	0	0	0	0	0	0	0	0	0	0	0	0.0457929	0	0.0214759	0	0	0	0	0	0	0	0	0	0
329.06	18.6958	10.0665	6.81661	11.5806	39.4781	57.005	54.9806	42.3072	43.6457	45.2201	41.1402	45.4633	51.5528	64.7464	104.267	120.511	103.561	62.5839	26.4716	9.64802	5.84094	4.61096	3.1126	0.6576	0	0	0	0	0	0	0	0	0	0	0	0	0	0	0	0	0	0	0	0	0	0	0	0	0
330	12.6988	8.62726	9.78026	6.34119	35.7052	52.9199	53.1532	41.215	42.8649	43.1851	39.5267	44.0743	49.9944	62.2985	99.7754	115.641	100.491	61.3088	26.4528	9.94559	6.34966	5.46358	3.51436	1.37852	0	0	0	0	0	0	0	0	0	0	0	0	0	0	0	0	0	0	0	0	0	0	0	0	0
331.07	0	2.33169	14.3771	11.8702	29.2371	50.7907	52.4334	40.1017	42.164	41.4784	38.7829	42.3175	48.3644	60.2767	95.7313	111.516	97.515	60.5088	26.4206	10.4822	7.07041	5.89518	3.99625	2.04315	0	0	0	0	0	0	0	0	0	0	0	0	0	0	0	0	0	0	0	0	0	0	0	0	0
332	0	0	8.60179	7.68742	25.9702	47.5528	48.2902	38.8606	40.2345	38.9298	37.0258	40.1683	45.6627	57.2093	90.8135	107.081	94.0687	59.3653	26.9619	11.8585	7.45977	6.39483	4.7447	2.61128	0	0	0	0	0	0	0	0	0	0	0	0	0	0	0	0	0	0	0	0	0	0	0	0	0
333.07	0.395185	0	0	10.021	23.0935	45.4646	46.0651	36.6647	38.0615	37.7075	35.6202	38.3994	43.2112	54.7012	86.4597	103.071	89.9608	57.8302	27.8573	13.1667	7.94027	6.72996	5.49851	3.08153	0	0	0	0	0	0	0	0	0	0	0	0	0	0	0	0	0	0	0	0	0	0	0	0	0
334	10.4777	1.57854	2.21456	5.92913	19.5891	44.8092	44.1028	35.4754	35.4317	36.0615	33.5854	37.0829	41.2212	52.3259	82.6498	99.3235	87.4617	56.307	28.2335	14.522	8.86404	7.20995	6.18898	3.86704	1.02102	0	0	0	0	0	0	0	0	0	0	0.0669859	0	0	0	0	0	0	0	0	0	0	0	0	0
335.07	7.07068	9.81458	7.26795	4.83623	17.4044	43.4221	41.9629	34.1586	33.8404	35.5347	33.0259	35.2994	40.431	50.6071	79.9	96.3528	84.6457	55.529	28.2819	15.4995	10.1465	7.43342	6.53385	4.56984	1.46182	0	0	0	0	0	0	0	0	0	0	0	0	0	0	0	0	0	0	0	0	0	0	0	0
336	10.5248	12.5268	6.94877	4.36946	23.4833	39.2156	37.3159	32.9764	33.1666	34.0989	32.1119	33.8847	38.1946	48.821	77.3157	92.8507	81.921	54.5492	28.6199	16.6095	11.1405	7.9223	7.07289	5.26985	2.37315	0	0	0	0	0	0	0	0	0	0	0	0	0	0	0	0	0	0	0	0	0	0	0	0
337.07	6.10778	8.73301	1.8841	5.81133	23.2428	36.9553	35.7137	32.5236	32.6277	32.4067	30.9035	32.0491	36.6908	47.3425	75.2155	89.7999	79.4671	53.8784	29.2922	17.5544	12.1645	8.84935	7.68654	5.81826	3.05586	0	0	0	0	0	0	0	0	0	0	0	0	0	0	0	0	0	0	0	0	0	0	0	0
338	4.93091	4.20693	0	5.69797	18.9523	34.2926	35.2206	31.0782	31.5924	30.4999	28.5503	30.7801	34.9753	44.9895	72.4096	86.26	77.4293	53.0968	29.8277	18.8589	13.6285	10.1187	8.70715	6.68626	3.88874	0.000721772	0	0	0	0	0	0	0	0	0	0	0	0	0	0	0	0	0	0	0	0	0	0	0
339.07	0	3.04629	0	4.4812	11.1935	32.2679	34.167	29.6059	30.7399	29.3005	27.7226	29.3162	33.9596	43.1109	70.0879	83.5893	74.8454	53.0476	30.4599	20.2725	15.0338	11.2041	9.46962	7.28025	4.73543	1.51592	0	0	0	0	0	0	0	0	0	0	0	0	0	0	0	0	0	0	0	0	0	0	0
340	0	10.4245	3.60918	2.76532	12.0376	31.2646	31.6344	27.7821	30.3026	28.8907	27.3468	28.6019	32.6077	41.7779	67.9329	80.8768	73.1214	52.4991	31.3201	21.723	16.2606	11.8916	10.2871	8.15829	5.58082	2.83666	0	0	0	0	0	0	0	0	0	0	0	0	0	0	0	0	0	0	0	0	0	0	0
340.93	6.45312	12.3523	4.82062	1.06583	13.2405	30.0015	30.3807	27.3092	28.681	28.0631	26.3371	26.9279	31.0146	40.2619	65.9366	79.1085	72.2576	52.2227	32.5076	22.9392	17.6389	12.6457	11.3079	9.10329	6.35803	3.59708	0	0	0	0	0	0	0	0	0	0	0	0	0	0	0	0	0	0	0	0	0	0	0
342.03	5.3952	8.97169	0	5.55958	17.109	27.9185	29.9253	26.4039	27.8259	27.496	25.2743	26.5658	29.1955	38.056	63.7968	77.1478	71.5091	51.8895	33.808	23.9707	19.4391	13.9102	12.2098	10.3648	7.33739	4.38357	0	0	0	0	0	0	0	0	0	0	0	0	0	0	0	0	0	0	0	0	0	0	0
342.96	0	0	0.060393	5.94899	15.4045	26.6341	28.6553	26.365	26.8901	26.6695	23.9302	25.8021	27.6976	36.5322	61.8507	74.9085	70.0029	52.1252	35.059	25.415	21.2184	15.721	13.2481	11.2066	8.62107	5.52597	1.78148	0	0	0	0	0	0	0	0	0	0	0	0	0	0	0	0	0	0	0	0	0	0
344.06	0	0	4.96696	0	12.0592	26.2743	28.5768	25.914	27.0565	25.7573	22.9389	24.4969	27.4476	35.909	59.9139	72.9661	68.6945	51.5698	35.7487	26.9079	22.792	17.4414	14.3849	12.341	9.89626	7.00226	3.40936	0	0	0	0	0	0	0	0	0	0	0	0	0	0	0	0	0	0	0	0	0	0
345	2.15358	0	8.39581	0	9.32436	25.7463	28.327	25.4094	26.0843	24.7722	21.6758	23.1112	27.356	35.4337	58.2568	72.1104	68.1648	51.6891	36.4119	28.3396	24.1495	18.7006	15.5912	13.2723	11.2771	8.38401	4.61382	0	0	0	0	0	0	0	0	0	0	0	0	0	0	0	0	0	0	0	0	0	0
345.93	4.69778	1.76967	0	0	9.37392	25.3595	26.985	24.7003	25.4455	23.9914	21.2339	22.4149	26.3437	34.6672	57.1019	71.5772	68.6104	53.009	37.6301	29.5293	25.5462	20.4243	16.9653	14.7373	12.8222	9.58656	6.05311	0	0	0	0	0	0	0	0	0	0	0	0	0	0	0	0	0	0	0	0	0	0
347.03	0	3.11134	0	4.50287	9.27527	24.2414	26.0958	24.624	24.6865	23.8526	20.6699	22.1293	25.0601	33.7342	55.5151	69.8323	68.0726	53.7884	39.1148	31.5246	27.0586	22.6537	18.8365	16.4639	14.6061	11.3398	8.14944	0	0	0	0	0	0	0	0	0	0	0	0	0	0	0	0	0	0	0	0	0	0
347.96	0	0	0	3.82621	6.45961	25.1732	26.4458	23.8716	24.6984	23.8762	20.4095	21.088	24.2569	32.9473	54.782	68.6398	66.638	54.4907	41.0739	33.8564	29.3871	25.3368	21.4064	18.6724	17.0137	13.3872	9.96631	4.70912	0	0	0	0	0	0	0	0	0	0	0	0	0	0	0	0	0	0	0	0	0
349.06	0	0	0	0.0646559	7.54504	24.4975	26.0604	24.3048	24.3103	23.1818	20.0772	20.5663	23.7832	32.0512	54.5716	68.4574	66.0878	55.0451	42.7666	36.3371	32.269	27.5306	23.921	20.575	19.8585	16.2688	12.3409	7.74177	0	0	0	0	0	0	0	0	0	0	0	0	0	0	0	0	0	0	0	0	0
350	0	0	0	0	7.27425	24.1521	24.6815	24.081	24.4859	22.0789	19.8311	19.6851	23.058	31.1369	54.9045	68.3018	66.6825	56.6752	45.0866	38.3282	34.7936	30.1499	27.0863	23.3591	22.6024	19.3678	15.2994	10.2463	0	0	0	0	0	0	0	0	0	0	0	0	0	0	0	0	0	0	0	0	0
351.07	0	6.20411	0	0	11.8467	22.8726	25.3008	23.6851	25.0789	22.0932	19.1355	19.2584	22.0733	30.4556	54.8136	68.1802	67.8806	57.7677	46.2596	40.252	36.3879	33.4619	30.5924	26.6053	24.878	22.5354	18.511	12.943	0	0	0	0	0	0	0	0	0	0	0	0	0	0	0	0	0	0	0	0	0
352	0	5.20271	0	3.04603	11.8015	23.4103	26.5362	22.7627	24.7022	22.0433	18.1178	18.8039	21.7032	30.0777	54.9125	68.3942	68.7117	59.7358	47.658	43.0733	38.9971	37.0687	34.7846	30.2258	27.7185	25.9137	21.4009	16.014	6.01719	0	0	0	0	0	0	0	0	0	0	0	0	0	0	0	0	0	0	0	0
353.07	0	0	5.30237	6.2349	10.6532	21.6268	26.8399	23.2313	23.9492	21.5602	18.1156	18.5033	21.6409	29.8439	54.0312	69.1152	69.9284	60.7674	49.2731	45.8418	42.6866	39.9019	38.6888	33.9498	31.9244	29.8191	24.865	18.7262	11.0931	0	0	0	0	0	0	0	0	0	0	0	0	0	0	0	0	0	0	0	0
354	0	0	13.6961	1.81629	7.82147	22.3422	26.432	24.6773	24.5417	21.4849	18.4966	18.394	21.3967	29.4871	53.5896	68.7061	70.1133	61.9977	52.0419	48.6275	46.5747	43.2619	42.8199	38.0963	36.566	34.3432	28.8957	21.8423	15.1084	0	0	0	0	0	0	0	0	0	0	0	0	0	0	0	0	0	0	0	0
355.07	0	0	8.41965	0.117467	10.8949	25.1294	27.8255	26.6576	25.0625	21.4059	18.6114	18.1998	20.7469	29.5351	53.9719	69.9312	70.9196	63.275	54.5151	50.9876	48.9766	47.0048	46.5307	42.1101	40.0481	38.6764	32.6339	25.1146	18.1094	0	0	0	0	0	0	0	0	0	0	0	0	0	0	0	0	0	0	0	0
356	0	0	0	0	9.98219	28.0536	28.1047	27.714	24.8779	20.8097	17.9902	17.632	20.7048	29.776	55.2984	71.0724	72.0998	65.6094	56.6101	53.8484	51.6799	50.3198	50.3327	46.7533	43.3133	43.1838	36.5642	29.1829	20.8742	0.420339	0	0	0	0	0	0	0	0	0	0	0	0	0	0	0	0	0	0	0
357.07	0	0	0	0	6.81898	30.274	29.2584	28.88	24.9408	20.5288	17.1628	17.1427	20.3009	30.0959	55.6583	71.7496	74.1726	67.5781	59.0257	56.6963	54.5144	53.333	53.3525	51.0131	47.8786	47.7831	40.5723	33.1949	23.7838	10.5234	0	0	0	0	0	0	0	0	0	0	0	0	0	0	0	0	0	0	0
358	0	0	0	0	8.05326	29.9264	30.1199	28.6995	26.0337	20.5735	17.1506	16.9818	19.8346	30.022	55.6797	71.5954	75.5983	69.7722	61.5316	60.1751	58.8215	57.9331	58.2259	55.5194	53.8072	53.1637	46.1112	38.1032	27.9143	16.8732	0	0	0	0	0	0	0	0	0	0	0	0	0	0	0	0	0	0	0
359.07	0	0	0	0	13.3012	30.6312	32.7415	29.3182	26.3388	20.5982	17.2009	17.0769	19.306	29.9648	55.9875	73.5713	76.4747	71.9096	63.8968	63.3112	62.0822	61.6157	63.5025	59.8101	59.2484	58.0341	51.4088	42.7904	31.9328	20.63	0	0	0	0	0	0	0	0	0	0	0	0	0	0	0	0	0	0	0
360	0	0	0	0	13.7705	31.5301	34.4226	30.3811	26.5939	21.1752	17.7834	17.1053	19.8728	30.5326	57.6651	75.7438	77.3823	74.0586	66.7321	66.7032	65.6795	65.3535	68.2986	64.9474	64.8976	63.4511	56.8135	48.2492	36.2956	24.6073	0	0	0	0	0	0	0	0	0	0	0	0	0	0	0	0	0	0	0
361.07	0	0	0	0	14.5301	33.0233	35.5088	32.7274	27.4787	21.3343	17.7857	16.9507	19.4996	30.9291	58.4007	77.1557	78.9636	75.8456	69.9121	69.0242	68.673	68.931	71.8901	69.4802	69.6667	68.4913	61.6824	52.7894	40.1561	27.4121	0.889163	0	0	0	0	0	0	0	0	0	0	0	0	0	0	0	0	0	0
362	0	0	0	0	14.7108	34.5811	37.6523	33.871	28.3936	20.9599	17.7073	16.7491	19.5225	30.9257	59.9002	78.2619	81.8413	77.4759	73.3177	72.4912	72.8772	73.8915	76.8471	75.3147	74.6446	74.7674	68.6762	58.1322	45.2532	31.0019	12.5407	0	0	0	0	0	0	0	0	0	0	0	0	0	0	0	0	0	0
363.07	7.32872	0	0	0.468018	13.5924	37.7871	39.8455	34.3196	28.8762	21.634	17.2626	17.2455	19.7687	30.7155	60.9506	79.7812	84.5113	79.7455	76.2705	76.297	76.4451	78.4904	82.1211	81.0889	79.7156	80.9262	75.3017	64.3946	50.8575	34.7475	17.8234	0	0	0	0	0	0	0	0	0	0	0	0	0	0	0	0	0	0
364	11.4345	0	0	2.82509	12.4483	39.4671	43.3854	36.1328	29.357	22.901	17.4818	17.2772	20.1519	31.3822	62.6484	82.0642	86.3978	82.5205	79.9215	80.8918	80.8939	83.709	87.6191	87.2789	87.0405	88.6233	81.8814	72.4201	57.3673	39.5865	22.5384	0	0	0	0	0	0	0	0	0	0	0	0	0	0	0	0	0	0
365.07	3.09543	0	0	0.505113	16.1814	40.4746	44.9055	38.9459	30.9271	23.401	17.2776	16.9212	20.0306	31.9087	63.2803	83.9971	87.8944	86.146	82.9518	83.9792	85.4261	88.5696	93.8538	92.5167	94.8742	95.3929	87.9959	79.157	62.8157	44.2677	25.9717	0	0	0	0	0	0	0	0	0	0	0	0	0	0	0	0	0	0
366	0	0.480233	0.610611	2.0007	18.0912	43.1796	47.9211	42.0691	32.1151	23.3524	17.22	16.8118	19.9893	32.5067	65.0909	85.7968	90.5112	89.2721	85.5934	87.8824	90.6181	92.8915	99.435	98.3097	102.853	102.698	95.9874	85.6818	67.9934	48.4587	29.3638	0	0	0	0	0	0	0	0	0	0	0	0	0	0	0	0	0	0
367.07	9.37874	1.94661	0	4.51993	19.179	46.3491	50.0635	43.8768	33.6873	23.7197	17.8282	17.4237	20.312	33.1498	66.6457	87.9201	93.7473	92.863	89.1838	92.2938	94.9235	97.0443	104.213	105.069	108.884	109.289	102.961	92.7285	73.1065	51.9949	32.4143	10.8406	0	0	0	0	0	0	0	0	0	0	0	0	0	0	0	0	0
368	12.9099	10.206	4.84055	7.45062	19.2916	48.434	52.2541	44.9269	34.4769	24.4876	18.1884	17.9579	20.4196	33.8621	67.9007	90.6089	96.2375	95.4625	93.762	98.7359	100.113	102.73	110.074	111.828	115.639	116.723	110.173	99.9316	79.4244	56.9511	35.6309	16.4243	0	0	0	0	0	0	0	0	0	0	0	0	0	0	0	0	0
369.07	2.60633	9.04589	12.1281	1.91547	17.9201	50.0491	52.4484	46.2958	35.4368	25.2576	18.3539	18.2784	20.7385	34.0538	69.4326	92.8778	98.6193	99.1011	98.35	103.602	105.13	108.807	117.568	118.389	122.175	124.641	117.18	105.982	85.3831	62.0298	38.8671	19.5985	0	0	0	0	0	0	0	0	0	0	0	0	0	0	0	0	0
370	0	2.88395	8.53749	0.746844	20.1359	51.9999	54.654	47.8277	37.1628	25.0477	19.0039	18.5191	21.1807	35.1794	71.5306	95.2883	102.105	102.394	102.041	108.165	110.947	115.719	123.668	123.702	130.568	133.719	125.083	112.65	91.5578	68.1321	43.1261	22.4432	0	0	0	0	0	0	0	0	0	0	0	0	0	0	0	0	0
371.07	0	0	11.0794	0	25.9056	53.6505	58.4717	49.7276	38.1994	25.5169	20.293	18.2801	21.5054	36.2487	72.9624	97.9784	105.67	106.105	105.959	111.857	116.307	121.567	129.907	130.138	136.977	142.704	131.484	119.729	98.1936	72.7751	46.6008	24.7508	3.39287	0	0	0	0	0	0	0	0	0	0	0	0	0	0	0	0
372	0	0	9.28511	2.31525	30.0914	56.2388	62.5379	50.6546	39.1608	26.3711	20.2613	18.2227	22.4027	36.8051	74.9064	101.368	108.038	109.146	110.352	118.069	121.717	127.574	136.717	137.425	144.603	150.159	139.51	127.353	105.303	77.5827	50.0997	27.4108	11.2232	0	0	0	0	0	0	0	0	0	0	0	0	0	0	0	0
373.07	0	0	12.258	6.43612	30.4233	59.6178	64.7922	53.4172	40.2343	27.8408	20.6329	18.6701	22.872	37.5219	76.7828	103.55	110.054	113.118	114.459	122.956	127.266	132.914	143.314	145.315	151.127	157.158	147.423	134.219	111.435	82.3322	53.7867	29.4419	14.8442	0	0	0	0	0	0	0	0	0	0	0	0	0	0	0	0
374	0	4.0326	7.97486	9.80683	30.3762	62.8449	68.4186	56.3202	42.261	28.1984	20.353	19.3849	23.2022	38.8426	78.8411	106.373	113.568	116.671	119.588	128.274	133.87	139.983	150.39	152.234	159.264	164.705	156.135	142.543	117.863	88.1916	57.8302	32.4425	17.7144	0	0	0	0	0	0	0	0	0	0	0	0	0	0	0	0
375.07	0	10.1061	14.5464	2.50036	32.5278	64.9697	70.6309	60.3541	43.034	28.8601	20.537	19.4526	23.3294	39.4534	79.9266	109.066	117.471	120.302	123.729	133.589	139.214	145.148	157.449	158.104	165.813	173.068	162.952	149.481	124.627	93.7877	61.137	35.1365	19.4857	0	0	0	0	0	0	0	0	0	0	0	0	0	0	0	0
376	0	12.8778	13.9651	6.65065	32.7107	67.3482	72.7062	62.7914	44.5933	29.474	20.7257	19.5696	23.9238	40.0901	82.029	111.629	121.022	124.177	128.137	139.63	144.634	151.699	164.097	163.968	172.641	181.065	170.276	156.435	131.1	98.658	64.7945	38.6725	21.5413	1.82402	0	0	0	0	0	0	0	0	0	0	0	0	0	0	0
377.07	3.81144	9.06758	15.8345	13.9723	32.6293	70.6955	74.5438	63.9431	45.8187	29.8859	21.9705	20.1799	23.9551	40.6926	83.6097	112.888	124.465	128.405	132.253	145.012	149.673	157.178	168.492	168.984	179.108	188.733	176.931	163.594	136.977	103.566	68.7318	41.3694	23.4697	8.72908	0	0	0	0	0	0	0	0	0	0	0	0	0	0	0
378	9.21607	12.1092	7.50708	18.389	33.8959	73.0674	79.1547	65.1592	46.4866	30.8338	22.2611	20.7363	24.2719	41.5606	85.5773	115.511	128.062	131.806	136.452	150.114	155.979	164.605	174.496	176.246	186.509	195.166	184.678	171.374	143.316	107.78	73.2631	44.1204	25.9738	12.6043	0	0	0	0	0	0	0	0	0	0	0	0	0	0	0
379.07	9.13102	1.13778	3.95365	11.5033	36.3626	75.2417	82.8095	68.0609	46.1145	31.995	22.3679	20.9708	24.6129	42.2429	87.8809	118.763	130.155	135.492	140.629	155.937	161.8	169.176	182.455	183.707	192.778	200.811	192.418	177.799	149.004	113.92	77.6731	46.5962	27.8077	14.8649	0	0	0	0	0	0	0	0	0	0	0	0	0	0	0
380	0	5.56674	7.79498	11.2255	37.7224	79.3633	86.2902	70.8242	48.2707	32.8951	22.519	21.0374	25.6271	43.1584	90.4361	121.637	132.482	140.026	145.216	161.235	168.408	175.954	188.668	190.181	198.148	206.73	200.278	182.58	155.066	120.031	81.6635	50.0167	30.4403	16.6651	0	0	0	0	0	0	0	0	0	0	0	0	0	0	0
381.07	3.24583	9.70731	5.74191	13.2932	37.0684	83.1647	89.3729	72.594	50.1355	32.6745	22.7145	21.3559	26.2299	44.0421	91.7526	123.753	135.855	144.06	150.8	166.419	174.254	180.648	195.804	194.864	203.138	214.98	206.977	189.47	162.129	126.215	85.2592	53.0745	33.1843	18.7253	0	0	0	0	0	0	0	0	0	0	0	0	0	0	0
382	2.89163	17.6974	6.83403	10.0749	39.2555	85.5147	90.8191	74.2132	52.328	33.281	23.3688	22.3707	26.2143	45.1346	92.6847	126.521	140.092	148.538	156.216	171.4	180.28	187.84	200.467	202.126	211.317	222.351	213.204	197.937	168.529	130.266	90.2227	56.7854	36.3828	21.02	7.28788	0	0	0	0	0	0	0	0	0	0	0	0	0	0
383.07	10.4203	15.1172	8.97966	9.53961	39.0547	86.679	91.958	76.9924	52.4401	34.2247	24.3633	22.7343	25.85	45.7138	94.522	128.352	142.751	152.303	161.473	176.169	185.72	193.626	206.713	207.983	218.421	228.518	218.837	204.732	172.788	134.933	94.2819	60.5505	39.1201	23.3023	10.7504	0	0	0	0	0	0	0	0	0	0	0	0	0	0
384	8.96475	16.0099	16.1412	14.7378	40.6626	87.8778	92.1466	78.8422	55.0908	35.185	24.5041	22.6974	26.4132	45.6471	96.483	131.606	144.763	155.654	165.933	182.573	191.421	198.899	211.504	212.07	223.155	233.298	225.011	210.632	178.404	140.108	99.3954	64.6054	42.0606	25.5536	13.5035	0	0	0	0	0	0	0	0	0	0	0	0	0	0
385.07	3.58143	10.4551	10.1004	22.8604	43.3609	90.0723	96.5561	80.6	55.7042	35.68	24.3533	22.3434	26.9699	46.257	97.2405	133.305	147.127	159.521	171.512	188.458	197.337	202.86	218.258	216.234	228.548	239.838	232.536	216.959	185.07	145.86	103.435	67.985	44.8108	27.9205	15.6392	0	0	0	0	0	0	0	0	0	0	0	0	0	0
386	4.8086	10.1226	6.8598	16.8311	47.674	93.7051	99.1172	82.0321	57.0292	36.6282	25.1657	23.016	27.2952	47.1096	97.8568	135.071	151.241	164.675	176.838	195.621	203.237	210.406	223.276	221.659	234.748	247.689	239.287	225.033	192.506	150.968	108.096	71.9887	47.7732	30.7252	17.8122	0	0	0	0	0	0	0	0	0	0	0	0	0	0
387.07	12.4715	16.7281	0	16.0656	50.6264	94.5251	102.035	85.7624	56.8583	37.088	26.122	23.3438	27.8908	48.1069	99.2148	137.112	155.717	168.814	180.998	200.078	208.918	218.293	229.153	227.469	240.162	252.764	246.219	231.491	197.863	155.933	111.576	75.6803	51.2924	33.7096	19.747	8.5296	0	0	0	0	0	0	0	0	0	0	0	0	0
388	27.1879	15.7979	5.83653	20.3007	51.4791	94.815	103.221	87.3365	57.7911	37.5383	26.3639	23.8122	28.6149	48.8414	100.987	141.362	158.405	170.737	183.772	204.11	215.11	223.413	234.213	231.835	242.527	256.546	251.571	236.874	203.047	162.538	116.257	79.3775	55.0052	36.4492	22.2314	13.0022	0	0	0	0	0	0	0	0	0	0	0	0	0
389.07	24.7789	16.8104	4.14181	24.2801	51.5983	98.6742	106.559	87.0023	58.2845	37.9245	26.4785	24.1753	29.3272	49.2927	102.771	143.027	161.239	174.099	188.779	208.436	220.292	226.724	238.967	237.292	247.061	260.939	257.149	242.076	206.77	167.688	120.876	82.892	58.3152	39.2111	25.1119	15.9999	0	0	0	0	0	0	0	0	0	0	0	0	0
390	16.4787	17.2398	7.55468	21.6081	49.5214	102.307	109.009	88.137	60.7177	38.5133	27.1777	24.9559	29.8777	49.6355	104.474	144.36	163.893	178.551	194.593	213.96	225.369	232.267	245.352	242.564	253.13	267.928	260.962	247.671	213.346	172.096	125.412	87.2998	62.4978	42.7058	28.465	18.4672	0	0	0	0	0	0	0	0	0	0	0	0	0
391.07	10.3397	20.5701	13.7184	18.8257	51.8064	101.426	110.005	91.61	62.5116	38.7832	27.4992	25.3968	30.1511	50.656	105.828	146.071	166.74	182.874	199.821	219.122	230.2	239.149	251.543	247.93	259.637	272.677	265.262	253.771	220.21	175.235	130.51	91.9057	67.1766	46.5269	31.2745	21.6151	2.89805	0	0	0	0	0	0	0	0	0	0	0	0
392	13.8054	12.1768	27.2303	16.9092	54.0323	102.05	111.247	94.3818	63.4138	39.5845	27.5617	25.4641	30.1441	51.4767	106.52	148.472	168.873	185.437	203.092	222.494	234.617	243.961	254.813	251.576	262.95	278.674	269.868	258.992	226.753	180.336	135.187	96.809	71.6178	50.3126	34.4637	24.8418	13.2565	0	0	0	0	0	0	0	0	0	0	0	0
393.07	17.3685	10.0166	23.8954	18.3538	55.3585	105.42	116.302	95.3747	63.6952	41.1899	27.8685	25.2296	29.8913	52.1885	107.959	149.032	172.463	188.169	204.516	227.557	239.217	246.958	257.557	255.388	264.285	283.317	275.522	264.119	230.66	185.959	139.568	101.555	75.2093	54.0148	37.3631	27.4243	17.5816	0	0	0	0	0	0	0	0	0	0	0	0
394	18.4413	11.0989	16.2781	23.7613	51.5726	108.349	118.575	95.6507	64.8512	41.6664	28.5911	25.5921	30.0975	52.6249	108.789	149.918	173.292	191.475	207.127	231.467	242.955	250.008	261.724	258.978	269.521	285.648	281.714	268.742	236.3	191.759	143.114	106.272	78.9496	57.6178	41.022	30.0535	21.0764	0	0	0	0	0	0	0	0	0	0	0	0
395.07	18.2605	17.7018	17.2166	20.4324	50.1225	109.347	118.195	96.7673	66.0321	42.1163	28.8713	26.212	30.898	52.8095	110.997	151.767	174.411	194.794	210.746	236.082	246.753	253.74	266.027	261.792	275.248	288.27	285.063	271.889	240.774	195.604	147.438	109.834	83.4948	61.2142	44.3429	33.3009	24.1973	0	0	0	0	0	0	0	0	0	0	0	0
396	21.1928	18.5244	15.03	14.4138	51.6089	112.248	117.023	97.9297	66.9071	42.7216	29.3336	26.6081	31.7778	53.2304	112.158	153.578	176.438	198.093	215.291	239.728	251.246	257.009	269.407	265.067	279.865	292.57	288.279	276.211	245.36	201.518	152.272	113.922	88.3417	65.7557	48.7067	37.1362	27.3188	5.83316	0	0	0	0	0	0	0	0	0	0	0
397.07	19.8137	18.8374	16.048	13.7647	54.368	112.363	121.225	100.41	67.605	44.0283	30.1892	26.1523	32.0797	54.1734	113.613	155.179	179.671	201.263	217.166	243.087	256.575	260.338	272.951	268.209	281.234	298.569	291.358	280.057	248.393	207.117	156.366	119.159	92.765	70.3439	52.5074	40.7268	30.094	15.968	0	0	0	0	0	0	0	0	0	0	0
398	21.7429	22.7903	15.6455	17.047	56.9165	113.246	123.079	100.981	68.3232	43.6088	30.502	26.4026	31.9387	54.4333	113.02	155.98	181.901	201.984	220.169	245.869	259.21	264.131	275.891	271.365	282.828	300.527	296.056	284.49	253.022	211.441	161.917	124.765	97.4249	75.3151	56.8061	44.8955	33.1704	21.107	0	0	0	0	0	0	0	0	0	0	0
399.07	22.0993	22.7431	22.6438	21.0156	60.0691	113.837	122.744	101.766	69.5076	43.4922	30.4716	27.1641	32.2651	54.4548	112.624	157.703	184.33	202.332	222.598	249.186	261.944	268.052	280.229	273.577	285.399	301.69	299.406	288.504	255.14	213.746	167.318	129.057	102.34	79.1249	60.4362	48.7485	36.5475	24.0847	0	0	0	0	0	0	0	0	0	0	0
400	21.9713	23.5067	23.3831	23.8432	61.0645	117.829	123.411	102.301	70.3514	44.7252	30.625	27.4229	32.7941	55.2456	113.239	158.638	185.786	204.404	226.009	252.661	264.208	270.497	283.03	277.377	288.562	303.491	302.677	293.397	258.062	218.262	172.219	133.14	107.451	83.8777	65.1172	52.5553	40.1886	26.8163	0	0	0	0	0	0	0	0	0	0	0
401.07	17.9271	18.3146	25.1085	21.6163	60.455	118.906	127.557	104.063	71.8409	46.2511	30.9309	27.3027	33.3525	55.908	115.517	160.421	186.275	208.614	227.286	255.865	268.239	272.121	285.468	279.189	291.118	307.217	306.452	296.437	262.779	222.154	175.975	137.775	111.781	87.7375	69.0107	56.2506	43.6269	29.7746	7.25301	0	0	0	0	0	0	0	0	0	0
402	10.8107	22.7621	18.8942	22.5405	61.9789	120.889	130.354	106.456	72.1488	46.244	30.9734	27.6736	33.2738	56.0963	116.812	160.503	187.335	209.509	229.963	258.525	270.533	274.226	286.668	282.458	293.763	308.814	310.702	299.087	268.645	227.765	180.285	142.579	116.164	92.7987	73.4496	60.5011	47.2834	33.1206	17.5759	0	0	0	0	0	0	0	0	0	0
403.07	11.2326	19.5698	25.2298	26.8265	66.9852	119.555	129.2	105.679	72.8576	46.0049	31.5077	28.575	32.8198	56.5065	115.841	160.201	188.274	211.016	231.134	259.339	272.382	277.29	289.747	283.209	294.675	313.54	312.426	300.764	272.864	232.754	184.433	146.764	121.055	96.6334	77.239	64.5647	50.5315	36.0493	21.604	0	0	0	0	0	0	0	0	0	0
404	15.0485	19.4296	25.6199	29.3795	68.2717	119.77	127.451	106.448	72.4471	46.4788	31.5458	29.0919	32.7993	56.9498	115.433	160.426	189.478	212.638	233.126	259.269	273.089	280.38	291.215	284.678	295.759	318.677	313.77	304.854	274.463	236.154	188.964	150.95	125.805	101.29	81.9846	68.9135	53.9007	38.7254	24.3122	0	0	0	0	0	0	0	0	0	0
405.07	11.2717	15.0385	28.9725	21.7544	65.4601	120.473	127.473	106.367	73.0595	46.9079	31.7561	29.3507	33.0011	57.0346	116.872	162.873	189.748	214.701	232.895	260.619	275.598	282.874	291.29	285.023	296.824	320.486	313.923	307.241	275.962	237.909	194.678	155.264	130.447	104.942	86.2918	72.9744	57.1413	41.5961	26.2785	0	0	0	0	0	0	0	0	0	0
406	8.41277	25.5667	20.1475	17.8637	64.6946	122.21	129.856	107.356	73.8343	47.6177	32.2673	29.0513	33.7224	57.1353	118.264	163.591	190.204	214.937	233.166	262.759	276.399	284.303	292.627	287.503	299.582	318.855	317.338	309.445	277.674	241.557	198.781	160.45	134.487	109.613	90.5062	77.01	61.1982	44.3679	28.8715	4.77223	0	0	0	0	0	0	0	0	0
407.07	16.0944	22.9283	20.5472	20.2875	61.9111	124.432	132.076	108.304	73.4782	47.8354	32.9646	28.9117	33.6773	57.1372	118.288	163.589	190.897	215.084	234.029	265.039	277.211	284.596	296.302	289.39	300.141	319.802	318.761	309.241	283.463	245.093	202.376	165.381	138.662	113.799	94.0975	81.0074	65.1604	47.5332	31.2894	13.1002	0	0	0	0	0	0	0	0	0
408	12.9591	22.6447	17.8033	22.4101	64.3303	123.651	133.769	109.384	73.8625	47.6007	32.9688	28.8454	33.1362	57.1265	118.028	163.836	192.674	215.165	237.673	266.626	279.341	286.228	298.504	290.602	301.458	321.85	321.241	311.972	287.582	248.418	205.399	170.061	142.558	118.492	98.8573	85.1556	68.8809	50.8483	33.9766	17.5919	0	0	0	0	0	0	0	0	0
409.07	2.87113	21.868	23.5176	24.0259	66.5213	122.15	134.566	108.571	75.124	47.9026	32.7072	28.7153	33.5603	57.0701	118.418	164.7	192.309	217.333	240.11	268.726	279.452	289.766	298.926	290.326	300.788	324.021	320.811	314.62	289.665	251.684	210.339	174.386	147.071	122.717	103.231	88.7454	71.8557	54.1167	36.0587	19.9876	0	0	0	0	0	0	0	0	0
410	7.7934	19.2012	21.9639	25.5145	67.6968	123.092	135.317	107.425	77.623	48.3394	32.8922	28.8717	33.9889	56.6456	119.88	165.476	192.205	218.251	240.743	269.719	278.743	287.671	299.094	290.785	299.734	325.225	322.741	316.861	292.381	255.629	214.572	178.741	152.059	127.143	106.836	92.2939	75.012	57.0617	38.5362	21.9721	0	0	0	0	0	0	0	0	0
411.07	19.3346	17.9551	20.8134	27.2401	64.8172	127.648	134.898	109.11	77.43	48.4504	33.3221	29.4666	34.3786	57.3047	119.424	166.966	193.544	216.829	239.659	269.436	279.114	286.475	300.413	290.457	301.182	325.077	324.455	319.811	295.556	259.487	217.667	183.044	156.298	131.21	110.429	96.0234	78.4621	59.8269	40.9674	23.8023	0	0	0	0	0	0	0	0	0
412	19.574	12.6302	17.1424	22.823	66.2824	126.925	131.775	109.268	77.8378	48.6059	33.9656	29.7078	34.3308	57.9722	119.754	167.947	194.507	216.123	240.564	268.082	281.035	286.184	300.478	290.727	303.558	326.059	325.084	321.361	295.895	260.938	219.553	187.348	160.277	134.897	115.926	100.277	82.72	62.7352	43.5887	26.0155	8.00252	0	0	0	0	0	0	0	0
413.07	9.28684	15.8491	9.3956	21.5939	67.9519	122.962	130.814	109.843	76.7313	49.3026	33.9309	29.6422	34.8013	58.0789	119.225	166.681	194.42	217.325	241.468	267.759	282.305	286.694	300.176	292.472	303.94	325.466	324.534	323.82	296.721	263.082	221.373	191.101	164.27	139.509	119.675	104.615	86.6343	65.3505	46.3779	28.0154	11.0164	0	0	0	0	0	0	0	0
414	25.7198	10.2242	5.72837	24.0888	64.8586	122.995	131.538	110.792	76.5611	49.0058	33.9908	29.2531	34.4657	57.1867	120.062	164.873	193.643	217.968	241.576	267.315	281.536	286.571	298.998	293.389	302.987	326.286	326.215	324.109	300.301	265.374	224.792	193.8	169.058	143.605	123.207	108.171	89.9274	68.9264	49.1383	29.7762	13.3806	0	0	0	0	0	0	0	0
415.07	27.2431	13.5184	3.09675	28.8138	61.7666	123.226	131.94	109.585	76.5993	49.2322	34.1639	29.233	34.3817	57.8528	118.897	165.129	193.183	217.743	239.896	267.757	280.319	286.852	297.658	292.759	301.784	324.576	327.654	324.905	302.035	269.444	227.947	196.772	173.195	146.897	126.607	111.403	92.7236	71.4082	51.7068	31.4412	15.1139	0	0	0	0	0	0	0	0
416	25.4789	10.7136	0	25.5374	58.0588	121.985	129.728	109.66	77.2601	49.9899	33.8842	29.2914	34.7713	58.3656	119.19	166.641	192.032	218.634	238.913	267.036	277.463	286.662	295.564	292.362	303.405	324.319	329.422	324.212	302.792	270.419	231.515	201.438	176.941	150.524	130.251	114.971	96.1503	74.0084	53.5115	33.3671	16.8685	0	0	0	0	0	0	0	0
417.07	15.3403	11.6257	0	20.532	61.9161	123.092	129.088	109.39	76.7903	50.9272	34.0169	30.0289	34.9158	57.8314	119.092	166.638	192.662	218.194	238.744	266.195	277.052	282.916	296.861	294.125	303.717	324.348	328.318	324.372	303.367	273.262	234.71	206.105	181.792	155.506	132.992	119.287	99.7403	76.8021	56.0914	35.7429	18.2329	5.38061	0	0	0	0	0	0	0
418	11.165	11.2138	0	18.2152	66.2664	120.886	129.916	109.832	76.6967	50.9954	34.3833	29.9129	34.5421	57.5079	119.617	166.125	192.138	217.767	238.775	266.166	276.557	284.036	296.825	293.428	305.18	326.391	329.639	325.909	304.296	275.09	239.072	209.257	185.944	160.154	137.176	122.809	103.36	80.9176	58.6171	38.3714	20.1687	9.06479	0	0	0	0	0	0	0
419.07	11.0044	5.45437	0	14.7096	68.0419	117.359	129.354	108.599	75.1002	50.4207	35.0188	29.6018	34.5597	57.9682	120.209	165.998	191.616	216.394	238.634	266.726	276.705	283.128	295.892	292.157	302.413	324.503	327.019	326.921	304.377	278.274	241.834	212.78	189.396	162.42	141.708	126.42	107.007	83.878	61.7331	40.7791	22.2432	11.0919	0	0	0	0	0	0	0
420	3.49264	0	0	7.06202	66.2256	117.862	130.295	108.78	75.4231	49.5176	34.8685	29.7034	34.8536	58.9091	120.916	165.684	192.948	215.81	238.667	265.549	275.208	283.51	294.113	290.747	302.339	323.348	327.474	327.064	304.859	279.656	243.274	215.374	192.143	165.453	145.662	130.316	110.514	86.6481	64.1411	42.7801	24.3512	12.8839	0	0	0	0	0	0	0
421.06	7.44195	0	0	7.22979	64.0162	121.948	132.669	107.221	76.0613	49.6174	34.3328	30.156	34.8522	58.0874	121.517	164.418	193.446	214.476	238.079	262.969	273.32	282.116	293.125	289.944	300.317	323.891	325.983	327.574	306.358	282.345	245.133	217.965	196.386	169.347	148.313	134.27	113.668	89.5297	66.4643	44.6047	26.2671	14.2376	0	0	0	0	0	0	0
421.96	14.8139	0	0	11.3007	58.8675	121.995	132.325	107.615	77.0813	50.1392	33.8313	29.9756	34.2625	57.0985	120.965	164.711	191.574	214.197	236.127	261.581	272.812	280.152	291.198	287.913	299.473	324.627	327.057	329.072	308.092	283.085	247.587	220.742	200.041	174.4	151.536	137.571	116.628	92.3742	69.461	46.8771	28.1943	15.4569	3.60114	0	0	0	0	0	0
423.03	28.0166	0	0	0.236877	53.1947	119.782	128.156	108.272	76.1798	50.1447	34.1715	29.2976	34.3367	57.1494	120.846	165.086	189.711	213.919	234.021	258.706	272.265	279.055	288.671	286.547	297.191	322.073	324.208	328.264	310.851	283.214	248.706	224.321	203.13	177.011	153.886	139.622	119.804	95.5225	72.3199	49.3541	29.9646	17.0512	7.06756	0	0	0	0	0	0
423.93	26.2968	3.72039	0	0	56.6012	117.167	126.887	108.614	76.1386	49.8038	34.7642	29.2755	33.932	57.9674	120.441	164.974	190.869	214.463	233.256	256.724	271.092	276.201	288.378	285.188	296.431	319.503	324.571	326.703	310.719	285.205	250.112	225.997	205.578	179.32	156.499	142.271	122.987	98.663	74.843	52.0562	31.6643	18.7204	9.53824	0	0	0	0	0	0
425	18.9132	15.2778	0	0	54.9891	112.724	126.059	107.789	76.2495	49.6012	34.4903	29.4846	33.5316	57.7057	120.215	163.275	191.222	214.262	231.713	256.117	270.015	273.259	285.817	283.308	295.811	317.391	322.14	325.843	310.018	287.179	252.395	228.848	209.109	182.19	159.777	146.571	125.383	102.565	77.5658	54.9612	33.9126	20.7716	11.3242	0	0	0	0	0	0
426.06	24.6815	19.1388	0	0	52.0488	114.941	126.295	106.3	76.3835	50.0354	34.0777	29.5603	33.4943	57.1938	119.663	163.57	191.647	213.259	230.492	254.967	266.254	270.012	282.76	279.412	294.774	317.937	321.874	324.237	307.981	288.817	254.629	231.696	212.222	185.907	164.804	150.706	128.964	105.568	81.5429	57.5484	36.6756	22.7092	12.9271	0	0	0	0	0	0
426.96	24.0791	11.2624	0	0	51.6613	119.826	126.557	104.418	76.7915	50.0738	33.6035	29.1131	33.9545	56.9122	119.924	164.165	191.4	213.566	228.305	252.779	262.34	268.772	279.223	276.452	292.076	315.619	318.478	322.249	307.504	286.665	255.039	232.472	214.865	189.138	168.994	153.141	132.854	107.98	84.751	60.4156	39.7	24.7084	14.4846	3.33675	0	0	0	0	0
428.03	20.1935	10.3073	0	0	58.2599	122.214	127.529	102.988	75.9884	50.6591	33.7474	28.6509	33.7907	57.0568	119.756	164.601	189.565	212.972	228.698	250.632	257.614	265.554	275.478	275.132	288.916	313.231	317.55	322.508	307.414	285.712	254.204	233.046	216.976	191.425	170.292	155.171	137.06	109.866	87.5979	63.1927	42.5165	27.0195	16.2014	7.33743	0	0	0	0	0
428.93	17.7392	5.27934	0	0	55.1055	118.265	125.488	103.607	74.9471	49.8554	33.8426	29.0351	33.9726	56.8033	119.088	163.994	187.982	210.6	228.296	248.519	256.502	262.552	272.882	272.674	286.77	309.564	315.457	320	307.404	285.58	253.78	234.999	219.549	193.924	172.094	159.074	139.852	113.679	90.8538	66.826	45.5753	29.9485	18.321	10.3643	0	0	0	0	0
430	16.7813	11.0765	0	0	48.4009	114.272	123.236	101.132	74.2233	49.2308	33.7614	29.3545	34.3452	57.4404	117.867	162.705	187.045	208.224	226.13	246.866	254.208	260.454	269.359	269.037	283.35	308.415	315.803	316.327	305.772	286.453	254.986	237.208	220.906	196.54	174.295	162.485	143.178	118.234	93.7769	69.7701	49.0003	33.3638	20.9168	12.5351	0	0	0	0	0
431.07	15.0755	13.2653	0	0	41.4469	111.981	122.425	99.0429	74.5914	49.1622	33.5512	29.1013	34.3415	57.1	117.251	162.431	187.083	207.548	222.624	245.613	251.299	256.974	268.198	266.4	282.653	304.774	313.592	313.543	303.344	285.351	257.848	240.195	221.693	199.213	176.886	165.461	145.994	122.185	96.9769	72.3962	52.0255	36.7015	23.4446	14.5394	3.62601	0	0	0	0
432	24.8597	17.771	7.21667	0	42.9099	110.536	119.293	98.0214	73.6716	49.6012	33.6543	28.3436	33.6682	57.1461	117.003	160.957	187.696	207.109	221.903	243.081	248.367	253.158	264.853	263.72	278.968	300.649	309.339	311.661	300.713	282.336	258.613	242.798	223.842	200.463	179.359	168.078	147.71	124.319	100.144	74.8371	54.6101	39.7094	25.3519	16.2996	8.83752	0	0	0	0
433.07	31.1422	15.261	13.2054	0	40.1373	109.449	118.72	100.807	73.6217	49.4244	33.4123	28.3731	33.1078	56.855	118.418	161.805	187.482	205.636	222.09	239.691	246.229	249.83	262.016	260.108	276.315	296.822	303.983	309.628	300.722	284.632	257.93	242.719	225.683	202.27	182.432	170.348	150.393	126.748	103.604	78.72	57.3405	42.1298	27.8447	18.1668	11.5813	0	0	0	0
434	30.0072	21.8874	10.1376	0	32.7475	106.269	116.072	99.9314	71.9678	49.0803	33.282	29.1171	32.5391	56.8164	119.138	161.388	184.885	205.14	220.087	237.028	243.824	248.336	258.506	255.942	272.856	294.517	301.52	307.282	299.915	283.956	257.302	241.429	228.328	204.912	185.665	173.036	154.063	129.493	105.887	83.2531	61.1782	45.1767	31.522	20.8065	14.0432	0	0	0	0
435.07	13.5478	19.9731	2.43344	0	22.2217	107.398	115.817	98.3065	70.6454	48.9	33.922	29.1283	32.6173	56.3443	118.811	161.905	183.164	205.483	217.969	236.098	239.829	245.149	256.086	253.606	272.5	292.058	299.849	306.204	298.196	281.968	257.599	243.505	229.03	206.95	188.31	176.544	158.08	132.878	109.46	86.7271	64.4285	48.4025	34.8165	23.4729	16.2874	0	0	0	0
436	17.7783	11.8307	11.8225	0	12.6871	105.746	113.342	96.9435	71.1831	48.3295	34.2247	28.5762	32.8868	56.3443	118.443	161.042	184.654	205.559	216.103	233.585	237.671	239.98	253.362	253.24	268.257	291.545	296.344	302.761	298.009	279.686	258.314	246.377	229.888	208.532	191.37	179.358	161.748	136.798	113.007	90.1481	67.7998	51.504	37.3742	26.093	18.3273	6.81129	0	0	0
437.07	19.8805	11.7079	13.2764	0	5.91183	103.756	113.388	95.384	73.5637	48.2035	33.6576	28.7758	33.3352	56.8023	119.543	161.451	185.029	205.734	215.556	231.586	235.099	236.736	248.71	251.276	264.42	290.672	292.989	299	295.689	279.332	259.202	246.738	230.98	209.448	193.448	182.257	164.757	140.205	117.094	93.1839	70.857	54.1174	40.0591	28.1306	19.9728	10.8215	0	0	0
438	34.1613	15.1043	17.3394	0	0	98.8043	112.815	93.4341	72.1337	48.2933	33.0214	28.5202	33.7092	56.5446	120.141	162.003	184.507	205.596	214.586	229.858	231.856	236.377	244.175	247.574	260.252	286.726	291.86	295.376	292.187	279.304	258.704	245.888	232.975	212.407	195.477	185.139	166.876	142.881	120.255	96.2705	74.6045	57.1303	42.7474	30.3512	21.5463	13.5245	0	0	0
439.07	30.279	22.2173	10.9375	0	0	94.4267	111.656	92.5413	70.4317	48.1432	32.6444	28.3207	33.6351	56.7886	119.261	162.923	185.168	206.009	214.339	228.951	227.793	234.415	242.026	244.255	257.99	280.487	289.608	294.363	288.968	277.922	258.263	247.594	233.946	214.29	198.105	188.979	169.558	146.27	124.436	99.2183	77.8906	60.4253	45.2773	32.5884	23.5566	15.2564	0	0	0
440	15.9129	14.3375	15.7062	0	0	89.9797	108.597	92.5764	69.4398	47.7411	32.844	28.6811	33.5007	56.8268	119.402	162.702	187.376	205.18	213.492	226.66	225.79	230.553	240.311	241.714	255.382	276.972	285.498	293.82	288.604	276.87	259.134	249.436	235.688	216.963	201.542	191.183	173.316	151.222	127.853	103.606	81.4927	63.751	48.0481	35.6081	25.8751	16.8875	0	0	0
441.06	9.09783	16.4075	14.3553	0	0	86.3696	106.86	91.1847	68.2881	47.5115	32.8483	29.6447	33.3704	57.6145	120.95	163.025	187.561	205.116	212.917	224.126	225.443	227.152	238.399	238.601	254.338	275.79	281.51	290.974	286.304	274.861	261.213	251.34	238.709	218.046	204.216	194.723	176.21	155.309	131.384	107.905	84.8353	67.321	50.8965	38.3106	27.6798	18.5274	4.56105	0	0
441.96	24.8277	16.584	10.2238	0	0	80.4138	107.574	91.6507	67.1693	47.3763	33.6054	29.3696	33.6064	58.0085	121.009	164.427	188.151	205.982	213.318	222.327	224.164	225.051	235.253	235.885	250.282	273.921	279.4	286.747	284.67	275.181	261.265	252.359	240.757	220.126	207.296	196.985	179.773	158.251	134.492	111.894	88.6157	70.6413	53.6884	40.2596	29.5518	20.2171	9.42653	0	0
443.03	25.8277	13.0755	5.37979	0	0	67.0509	107.857	91.6048	68.2802	46.9947	33.5299	28.642	33.2913	58.3738	120.715	166.317	188.577	206.327	213.01	222.382	221.443	223.19	232.781	233.393	246.445	273.353	279.198	284.101	283.576	275.872	260.413	252.567	242.05	220.625	210.392	200.482	184.859	162.409	139.174	114.976	92.4458	73.6241	56.1432	42.0233	31.1744	21.5181	11.4367	0	0
443.93	16.4006	0	10.8693	0	0	54.4115	105.414	91.2654	67.6899	46.4083	33.3002	28.4118	33.5018	58.0568	121.03	167.105	191.301	206.913	213.235	223.043	218.518	221.309	229.363	229.756	244.029	269.767	277.194	284.891	281.718	275.014	259.883	251.869	243.278	224.858	213.367	203.594	189.7	165.779	143.965	118.436	96.1955	77.0563	59.3951	44.8887	33.1193	23.0674	13.0243	0	0
445	9.44659	6.06223	17.4659	0	0	42.5461	101.84	88.5902	66.7466	46.2863	32.9371	28.9092	33.3315	57.7245	122.928	167.835	192.589	208.565	213.157	222.791	217.726	217.915	227.154	226.466	243.786	266.785	274.776	283.651	281.966	275.814	260.242	252.054	245.492	228.699	215.412	208.199	193.653	169.997	148.116	122.897	99.8405	81.3927	62.6334	48.1357	35.4747	24.8768	14.3627	0	0
446.06	17.6467	23.4892	26.3891	0	0	36.4114	98.2922	86.7675	66.7282	46.3659	33.0427	29.7715	33.487	58.8978	123.535	168.974	193.767	209.574	213.208	219.867	217.188	213.783	224.01	225.137	240.828	262.54	270.51	283.326	280.82	273.534	261.707	254.619	247.263	231.01	218.764	211.704	196.888	174.192	151.546	128.246	103.058	85.2574	66.2318	50.5188	38.1277	26.9277	15.8546	2.89624	0
446.96	23.7518	31.3102	25.1957	0	0	24.1358	95.9774	86.367	66.8192	46.8956	33.1461	30.1757	33.2366	59.5192	124.434	169.844	193.475	209.747	211.787	218.449	215.765	210.619	221.38	222.469	237.914	261.022	268.729	281.576	278.374	272.015	262.079	256.879	249.202	232.017	221.659	215.423	199.576	179.148	155.703	132.48	107.13	88.7413	69.3324	52.8643	40.2715	28.179	17.2629	8.07306	0
448.03	30.9611	34.6471	15.4328	0	0	12.8829	92.0321	87.2192	66.0785	47.2103	33.326	29.8373	33.728	59.8912	124.945	170.109	194.333	210.378	213.3	217.436	212.878	209.071	218.479	221.953	236.985	258.501	266.098	280.477	276.607	271.077	263.194	258.643	250.062	233.968	225.863	218.414	203.214	182.283	159.533	136.383	111.289	91.8424	72.1568	55.2675	42.0091	29.5378	18.2514	9.65072	0
448.93	34.2119	29.9732	8.28512	1.17058	0	0.720573	85.3686	87.0806	66.3707	46.8818	33.3753	28.7812	33.9294	59.6506	125.266	171.109	196.043	212.456	214.126	218.295	210.778	207.459	216.067	218.676	236.135	257.419	266.076	276.843	275.367	272.386	261.213	257.939	251.371	233.833	229.475	221.413	207.342	185.88	164.249	139.655	115.994	95.2351	74.4456	57.8972	43.8801	31.171	19.5059	10.9491	0
450	26.9211	33.196	14.2105	11.3598	0	0	77.4457	85.0352	66.7663	46.0615	32.8468	28.1259	34.8178	60.4131	126.045	173.606	196.917	214.063	214.774	216.927	209.885	207.281	214.288	216.733	230.754	255.915	265.382	274.932	274.485	272.59	261.53	258.456	254.08	236.752	231.441	225.447	211.34	190.286	169.349	144.147	120.923	99.0704	77.8176	60.7384	46.334	33.06	20.8197	12.0684	0
451.06	26.931	28.1398	17.674	21.5636	0	0	64.3151	82.73	65.714	46.1163	32.427	28.1931	34.4336	60.6329	127.442	175.051	199.014	214.855	214.921	217.024	207.284	204.935	213.81	211.864	228.397	253.446	263.122	274.19	272.781	272.389	261.765	260.177	256.531	240.966	231.402	229.138	215.24	194.207	173.497	149.032	125.78	103.431	81.3294	63.2477	48.9679	34.9365	22.1045	13.4693	1.36901
451.96	31.6109	30.3631	15.7846	30.1547	0	0	42.0653	82.4971	64.5422	46.2939	32.6145	28.7395	34.1847	60.5779	128.722	174.698	200	216.762	217.11	215.539	206.984	202.486	211.749	210.553	226.318	250.196	258.344	271.892	273.213	270.983	261.813	261.723	258.08	243.935	233.486	232.151	219.613	198.206	176.937	153.947	128.942	107.272	84.9155	65.9851	51.1991	36.6651	23.2639	14.4991	6.58424
453.03	41.0985	21.4312	21.6408	22.5843	0	0	18.5625	83.0889	64.6605	46.2106	32.1258	28.699	34.1139	60.6601	129.652	175.233	202.258	218.326	217.629	215.228	205.748	198.677	209.96	209.165	224.823	248.911	255.69	270.611	272.385	268.136	260.119	261.781	258.527	244.337	235.913	234.086	222.784	201.143	181.212	157.467	130.641	110.442	87.3996	68.3018	53.0662	38.4671	24.3089	15.3253	8.19118
453.93	40.2465	25.1949	22.5304	27.8737	0	0	0	78.4012	64.8473	45.2551	32.1269	28.6645	35.2663	61.4124	130.754	178.461	203.587	218.823	219.251	213.886	204.093	198.722	206.022	208.43	220.699	247.463	255.812	266.814	271.576	267.464	260.57	261.943	259.645	245.567	239.615	238.063	226.39	205.68	185.369	160.646	134.704	113.212	90.6476	71.1746	55.2002	39.8494	25.636	16.1485	9.53
455	40.1336	27.8204	20.25	25.5481	0	0	0	69.7411	63.1208	45.4167	32.4706	28.6326	34.7718	61.8667	131.287	180.614	205.518	220.171	218.749	213.833	201.636	196.547	202.928	204.395	220.887	244.69	254.448	264.853	270.17	268.647	260.891	261.303	259.682	247.614	242.76	241.948	229.961	210.802	189.078	164.525	140.145	115.899	93.4572	73.4159	57.3872	41.6806	26.9265	17.112	10.5741
456.06	44.7388	33.2191	18.5072	25.2884	0	0	0	56.3505	61.9526	45.272	32.5438	28.3617	34.7317	62.356	132.002	182.325	207.605	221.286	219.22	213.999	201.914	193.538	198.872	201.817	220.276	240.844	250.477	262.912	266.64	269.066	258.956	262.849	260.225	251.373	245.469	244.502	233.132	214.739	192.622	167.446	143.886	119.859	97.0649	76.2798	59.425	43.2827	28.0892	18.1649	11.5313
456.96	34.521	23.3966	24.2077	13.1987	0	0	0	37.5264	61.2258	45.336	32.1793	28.8983	34.7658	62.421	133.287	183.142	208.46	222.326	219.06	214.845	201.964	190.272	199.151	200.524	218.287	237.804	245.946	261.421	264.436	265.974	258.021	264.082	261.768	252.218	245.27	246.941	235.753	216.31	197.029	171.169	147.148	123.703	99.6912	78.6964	61.3913	44.6015	29.0656	19.3004	12.2394
458.03	21.839	19.1212	22.507	14.0858	0	0	0	16.6865	61.9651	44.4237	32.531	29.3044	35.2734	62.3226	134.88	184.1	210.253	221.848	219.92	213.9	200.423	189.973	196.279	198.443	213.339	234.935	244.634	259.722	261.086	262.822	257.968	266.365	263.751	251.71	247.194	249.965	237.838	218.863	201.464	175.461	151.39	127.458	102.184	81.0614	63.6394	45.7181	30.5853	20.2861	12.9128
458.93	20.0836	18.3944	19.7322	15.3273	0	0	0	0	61.419	45.0045	33.0197	29.2625	34.3569	62.5583	135.026	184.902	210.885	224.025	219.592	212.539	198.781	187.637	193.753	195.253	210.554	233.732	242.31	257.334	259.036	261.012	259.732	265.45	265.11	253.483	248.836	251.464	240.748	222.873	204.655	181.023	154.803	130.044	104.201	83.3919	65.7019	47.4278	31.7336	21.2583	13.8026
460	28.8614	16.4615	15.2184	21.2746	9.52156	0	0	0	61.9482	45.3626	32.649	28.4114	33.96	63.158	135.156	185.792	212.596	225.989	219.324	211.68	195.521	184.562	188.82	192.716	209.057	232.327	240.575	253.763	257.587	259.316	259.535	264.518	265.24	256.616	251.733	252.021	243.46	226.206	205.676	183.99	156.119	132.398	106.466	85.2898	67.1551	49.1748	32.8779	22.0431	14.4649
461.06	29.2838	7.49526	9.68982	12.9882	25.8785	0	0	0	59.75	44.8457	31.5138	28.0662	33.9415	62.8939	134.479	186.499	213.869	227.286	218.655	210.816	193.3	182.169	187.6	190.843	206.132	229.163	237.438	248.838	257.906	258.15	258.867	262.767	264.733	256.781	253.233	255.289	246.597	229.84	209.269	187.15	158.208	134.967	109.138	87.5999	68.4547	50.8132	33.6746	22.8534	14.9806
461.96	21.873	12.9601	15.6625	8.25996	28.8828	0	0	0	57.7419	43.6781	31.0926	28.4464	34.5125	62.4374	134.204	187.502	214.876	227.827	218.356	209.325	191.16	181.529	185.876	188.909	203.145	224.958	235.893	247.253	255.84	258.074	256.044	262.981	263.833	256.369	256.217	258.148	248.053	231.711	214.458	190.151	162.039	138.768	111.669	89.4578	70.3206	52.3092	34.6425	23.7944	15.6397
463.03	20.9387	24.7895	24.2292	8.78048	30.8404	0	0	0	55.2223	43.7219	31.0433	28.5907	34.5423	63.1445	135.835	188.077	216.071	229.485	220.842	208.358	191.135	178.515	184.813	186.487	201.68	222.744	234.05	247.455	252.301	258.218	256.638	263.093	263.78	256.053	255.72	259.604	249.616	233.477	217.072	192.846	164.878	141.46	114.182	91.5505	72.454	53.7336	35.5412	24.6498	16.461
463.93	24.1494	25.3978	32.2295	14.6632	38.7598	0	0	0	54.3061	44.3961	31.4188	28.3547	34.8428	63.5296	137.12	187.862	217.039	230.324	221.625	208.747	187.638	177.013	181.694	182.764	200.007	219.866	232.424	245.652	251.921	253.883	255.246	262.93	263.087	256.464	255.289	259.585	251.346	235.41	217.751	194.711	167.646	143.835	115.866	93.5205	74.4833	54.7694	37.0398	25.3296	17.4072
465	34.6946	20.8326	25.4756	14.6393	43.1141	0	0	0	49.9022	44.1033	31.169	28.5403	34.7229	63.4972	137.119	187.612	217.557	229.537	221.789	208.733	185.904	175.299	178.302	179.06	197.079	217.397	229.4	242.395	251.113	252.511	253.823	262.853	263.489	257.053	255.755	261.361	253.319	238.594	219.564	197.774	169.495	145.487	118.126	95.6741	75.9807	56.1712	37.8132	26.1292	18.2365
466.06	40.567	27.004	30.9448	18.0223	42.816	26.4351	0	0	43.6176	42.6708	30.9196	28.3358	34.5139	63.0315	136.198	188.741	216.54	228.922	221.264	208.206	185.614	174.619	175.69	176.219	194.031	214.957	224.761	237.83	248.03	250.266	251.428	261.234	263.856	257.159	258.044	261.772	254.469	240.229	223.344	200.752	171.708	147.894	120.171	96.5992	77.1466	57.5975	38.3612	27.1245	18.9051
466.96	44.4281	34.3273	22.6741	18.6713	40.4062	44.7256	0	0	35.3753	41.5294	30.4993	28.3807	34.0026	63.1227	136.973	190.555	215.415	228.841	221.28	205.972	185.365	170.693	173.944	175.251	193.484	211.671	221.396	233.983	243.528	248.104	250.635	258.819	263.654	255.359	257.873	263.008	255.49	241.003	226.748	203.718	173.148	149.678	122.497	98.0712	78.011	58.7893	39.2267	27.9601	19.2209
468.03	42.4461	31.435	21.7749	18.3135	46.7397	54.1707	0	0	26.1531	41.6029	30.159	28.2138	33.8197	62.9363	136.789	190.041	215.658	228.404	218.318	203.472	181.094	168.856	170.94	173.659	192.047	207.702	219.4	231.839	240.363	242.906	247.606	257.127	261.715	255.437	256.348	263.151	256.229	242.44	228.08	205.36	174.979	151.452	124.274	99.744	79.2952	59.3413	40.2269	28.5332	19.5518
468.93	40.4289	31.8051	16.0288	20.0861	48.9598	62.4414	0	0	13.683	41.5056	29.6523	28.4008	33.8347	63.1626	137.279	188.586	216.597	228.908	218.114	202.3	179.775	165.966	168.047	170.844	189.401	204.307	218.22	230.667	238.09	242.255	246.762	256.444	261.743	255.002	255.254	264.136	256.838	243.525	227.994	206.071	178.099	152.354	126.136	101.571	80.6714	60.4387	41.233	28.8634	20.3196
470	31.73	37.9039	23.4908	23.8252	44.0429	68.0269	0	0	0	40.0794	29.6259	27.5988	33.8395	62.4587	137.2	187.702	217.342	228.093	219.189	201.653	178.969	164.144	166.24	167.008	182.249	202.182	214.202	229.224	236.74	240.085	244.711	255.163	260.365	253.326	253.968	264.919	257.515	244.575	228.484	206.246	180.483	153.771	127.421	103.087	82.2083	61.5274	42.031	29.4485	20.9767
471.06	28.0871	48.2949	22.4418	30.033	39.0408	71.987	0	0	0	38.6716	29.9361	27.5501	33.805	61.8541	137.295	189.399	215.103	227.412	218.693	201.644	177.213	160.695	164.508	165.133	180.731	200.179	211.128	226.098	233.789	238.889	242.159	252.818	257.935	252.398	254.556	264.649	258.501	244.771	230.647	207.548	181.317	155.295	128.373	104.049	83.171	62.4059	42.842	30.1542	21.4871
471.96	33.712	44.0519	31.7564	33.4728	37.9551	70.4574	0	0	0	38.1381	29.9784	27.6891	33.6572	61.649	135.621	188.229	214.512	227.775	215.379	200.23	174.462	159.233	161.685	162.662	178.484	198.194	208.221	221.295	229.051	235.808	238.758	251.012	255.29	252.202	254.834	264.718	258.749	247.215	232.009	207.845	181.633	156.517	129.359	104.443	84.3703	63.2062	43.3313	30.8444	21.8328
473.03	41.8307	42.7692	31.7178	31.4923	41.0244	70.9331	0	0	0	37.0611	28.7598	26.8421	33.3914	61.9278	134.448	187.042	214.572	227.883	215.053	197.518	173.9	157.211	159.784	159.136	176.815	194.522	206.124	216.383	224.61	234.055	238.362	250.394	254.967	251.959	255.685	264.199	259.433	248.473	233.352	209.698	182.918	157.604	129.986	104.383	85.2604	63.9036	43.8105	31.4074	22.6502
473.93	35.6939	42.1138	34.5283	25.3793	40.927	72.0852	6.19355	0	0	34.6054	28.1514	25.7975	32.6571	61.4297	134.66	186.531	214.888	225.753	214.944	195.438	172.656	155.169	157.663	156.699	171.988	191.228	202.697	215.043	223.226	231.239	236.046	248.842	253.735	250.349	255.069	264.637	259.071	247.438	234.478	211.526	184.144	158.002	130.811	105.386	85.6069	64.0486	44.3724	32.0155	23.0563
475	33.7794	45.4273	33.8418	23.63	40.862	72.0579	24.5385	0	0	30.7968	28.3973	25.0149	32.2921	61.2046	134.41	187.328	214.535	224.467	213.775	193.711	170.709	152.146	154.241	155.516	170.588	189.144	198.5	211.677	220.375	230.035	232.998	246.254	252.05	248.888	253.708	262.608	259.682	247.297	233.923	212.265	184.606	158.77	131.248	106.47	85.7633	64.6131	44.8863	32.2314	23.3176
476.06	23.1649	46.7848	37.193	19.7953	34.3552	69.0177	38.1372	0	0	26.4516	28.2071	25.0381	32.1638	60.9173	133.216	185.342	214.361	224.993	212.279	193.283	167.794	149.898	151.08	153.173	167.134	186.606	194.022	208.357	216.473	228.67	230.359	243.505	249.652	247.42	251.644	261.146	258.434	248.514	233.224	211.978	184.567	159.708	131.482	107.97	86.2713	65.342	45.2792	32.3172	23.5688
476.96	31.1249	38.5591	29.7285	19.6025	30.8228	66.7361	47.4635	0	0	21.022	27.4715	24.7946	31.3428	60.7891	131.693	183.501	212.855	223.62	211.43	192.108	165.396	147.674	149.038	150.367	164.831	183.206	191.848	204.976	211.879	225.225	228.303	242.385	248.237	246.434	250.266	260.239	258.864	248.565	234.017	212.059	184.838	161.165	131.156	108.149	86.9241	65.7553	45.7282	33.0338	24.1611
478.03	25.155	28.7184	24.9407	15.7806	32.7135	66.2808	53.8983	0	0	13.836	26.7255	24.6004	31.397	60.0802	132.596	182.338	210.82	223.078	209.99	190.581	164.134	146.226	147.733	148.099	162.328	181.219	189.46	204.526	210.29	221.246	226.872	239.164	246.064	245.194	250.76	260.021	257.42	246.427	234.666	212.647	185.886	161.801	132.208	108.742	87.0419	66.0339	46.3242	33.5992	24.713
478.93	33.2692	29.5522	25.2058	13.7728	35.0005	65.148	57.6967	0	0	0	26.3076	24.4664	31.6815	59.4384	131.541	181.939	210.32	222.339	207.951	188.181	162.204	143.215	146.145	146.05	159.445	178.196	185.696	201.048	207.809	217.36	224.041	236.861	244.305	243.46	249.151	259.634	256.256	246.35	233.54	212.24	185.051	162.868	133.169	108.851	87.7236	66.9094	46.6088	33.7447	24.8788
480	29.5324	38.2876	23.9349	17.1997	32.814	63.5023	61.2063	0	0	0	24.558	24.5597	31.2862	58.9649	130.72	180.635	209.295	221.728	205.777	186.043	159.405	140.048	142.956	142.837	156.075	174.831	181.768	197.888	205.424	214.114	220.353	234.321	240.735	241.539	247.216	257.004	253.871	246.681	232.131	212.143	184.946	161.54	133.299	109.183	87.8396	67.0796	46.6041	33.7591	25.0326
481.06	32.1039	32.815	12.5506	24.5968	29.4922	59.781	63.0247	0	0	0	22.6979	24.6465	30.3656	58.7209	128.869	180.06	207.946	219.455	204.18	184.892	156.758	137.343	139.647	139.998	154.119	170.323	180.294	194.477	202.738	210.965	216.507	232.976	238.599	239.057	244.183	254.947	252.855	245.638	232.52	210.582	186.35	160.842	132.942	109.228	88.3389	67.1471	46.9378	34.224	25.1173
481.96	30.1504	30.4669	5.28458	22.2688	28.5922	59.1733	64.1074	0	0	0	20.1575	23.5145	29.7045	58.258	127.416	179.566	205.224	218.49	204.843	183.617	155.766	136.15	137.744	137.133	150.486	167.316	177.63	191.905	199.867	207.839	214.396	229.236	236.442	237.819	243.023	253.414	252.341	242.481	231.14	210.439	186.936	160.208	133.145	109.497	88.1969	67.017	47.4817	34.3781	25.4077
483.03	26.3781	22.2477	8.41158	12.9083	30.1797	58.4895	63.2453	0	0	0	17.1067	22.335	29.4065	56.897	125.429	177.65	203.896	215.639	205.018	182.205	154.836	134.028	136.621	135.766	147.859	165.009	174.552	188.68	196.386	204.076	212.526	225.795	236.99	236.194	240.12	252.805	250.122	240.442	230.377	210.016	185.506	160.778	133.169	109.311	88.6004	67.2366	47.6019	34.6808	25.3849
483.93	22.0177	10.3453	19.2048	7.35007	27.3318	57.4764	60.9804	0	0	0	10.5809	21.9924	29.0491	56.1258	124.917	175.629	203.657	213.486	201.649	180.007	152.482	131.938	133.296	133.844	144.911	164.063	171.551	184.223	192.558	201.224	210.621	222.763	234.872	233.577	236.434	250.7	249.905	239.316	229.614	209.52	186.207	160.279	132.976	109.403	88.6197	67.5419	47.6678	34.8207	25.7005
485	9.96663	2.40037	17.962	12.7882	27.2849	55.0807	60.0825	0	0	0	1.10961	22.5474	29.1117	55.8445	123.933	174.24	203.595	211.136	197.401	177.988	149.417	129.166	130.275	130.47	143.64	161.892	167.757	178.935	189.09	199.562	207.167	221.284	230.634	229.65	233.296	247.917	248.521	239.205	228.519	208.417	186.314	160.2	132.233	109.432	88.4844	68.0923	47.8352	35.0791	26.1205
486.06	17.1315	13.976	16.9876	18.4293	24.9186	53.0385	59.6076	0	0	0	0	22.0293	28.5662	55.355	122.861	173.502	202.068	209.65	196.531	175.887	146.582	127.662	127.416	127.285	140.593	157.822	164.484	175.099	186.773	197.126	203.852	218.78	226.821	226.488	232.519	246.36	246.213	237.475	225.816	208.011	184.434	160.499	132.129	109.278	88.1831	68.5277	48.0548	35.3226	26.4738
486.96	15.3346	19.1171	9.96289	14.8265	29.0118	52.3679	58.5532	0	0	0	0	20.9204	27.8994	54.0259	121.972	172.585	200.11	208.694	195.249	171.88	145.593	125.546	124.041	125.236	138.401	154.434	161.756	174.43	185.571	193.777	200.663	214.655	225.291	223.454	233.29	243.733	242.361	235.433	225.249	206.35	182.332	161.243	132.558	108.965	88.6684	68.3085	48.1258	35.7234	26.8458
488.03	13.7655	24.1401	16.1834	3.97866	28.3567	51.0643	58.1528	4.17234	0	0	0	20.8971	27.0748	53.3493	120.78	170.357	196.792	208.227	192.809	169.989	143.763	123.851	122.59	125.304	135.895	151.969	159.52	173.655	182.359	190.887	198.286	211.772	222.844	222.117	231.019	241.361	240.826	233.155	224.501	205.349	182.835	160.896	132.571	108.856	89.0967	68.3657	48.0515	35.6912	27.0601
488.93	14.4033	19.7852	9.58377	8.57204	29.3985	50.1162	55.9475	23.1467	0	0	0	20.2857	26.889	53.7406	120.063	167.255	192.978	204.867	190.639	169.595	141.758	122.017	122.012	122.746	133.78	149.297	156.597	170.683	176.609	188.881	194.822	210.215	218.059	220.256	227.894	239.335	238.682	232.132	222.29	204.459	182.156	158.883	131.771	108.291	88.7353	68.0383	47.9954	35.8128	27.0985
490	13.0773	26.9643	19.6653	14.888	27.3249	48.9171	55.0169	35.4308	0	0	0	19.7634	26.4288	53.3591	118.905	164.408	190.301	200.742	190.326	169.229	140.473	120.283	120.54	120.157	131.418	146.404	153.542	165.97	172.764	186.368	191.583	207.202	215.033	217.41	224.144	237.116	236.247	229.442	219.002	204.21	180.593	157.332	130.964	107.849	88.4895	68.0875	48.1974	36.3964	27.2418
491.06	16.7123	25.9369	20.3897	16.6338	26.308	47.702	53.403	41.3137	0	0	0	17.5924	26.6074	52.178	117.476	163.89	190.009	198.491	188.515	164.816	138.807	117.863	115.776	117.162	129.416	143.163	149.975	163.306	172.081	182.559	188.499	203.012	213.365	213.446	222.387	233.033	233.775	227.558	218.506	202.333	178.057	157.129	130.3	107.526	88.2267	67.3831	48.2013	36.4967	27.5874
491.96	14.8048	30.1469	24.7184	9.85594	23.4107	45.6455	51.8641	44.077	0	0	0	13.4514	25.8227	51.2731	115.402	163.113	188.675	197.356	184.396	161.575	135.807	114.822	113.409	115.273	126.338	140.783	146.602	160.188	170.213	179.644	186.198	198.968	211.272	210.729	219.307	231.148	231.222	225.9	217.223	199.909	176.876	156.685	129.229	106.715	87.4975	67.3972	47.9991	36.1776	27.8391
493.03	13.74	17.293	19.1744	7.24701	19.5882	43.3576	48.2003	44.3201	0	0	0	6.49427	25.5166	50.3779	114.743	161.71	186.8	196.578	180.871	160.229	132.144	112.983	111.352	112.844	123.872	137.139	144.349	158.334	167.051	177.742	184.171	196.323	207.839	208.017	217.623	228.858	227.981	223.649	214.81	197.123	175.366	154.512	128.186	106.529	87.1896	66.9438	48.0572	35.793	27.8733
493.93	4.55612	14.8639	21.9933	13.3457	21.9772	41.9117	46.5846	43.8857	0	0	0	0	24.421	48.9776	112.788	158.53	184.715	193.91	179.322	159.443	130.787	110.86	109.938	110.876	121.664	135.262	142.161	155.315	162.584	174.953	181.721	193.902	204.648	207.18	215.113	226.402	226.92	219.902	211.608	195.038	173.649	152.758	127.24	105.629	86.7644	66.4111	48.2361	36.2395	27.9724
495	17.5638	17.4159	22.5441	10.7679	23.6611	40.3414	46.5114	41.6881	0	0	0	0	24.2779	47.9798	111.22	155.617	183.342	189.577	176.94	155.997	129.168	109.585	106.965	108.57	120.225	133.671	139.686	152.962	159.766	170.948	177.787	192.066	201.606	204.502	211.452	223.195	224.722	219.154	210.211	192.959	172.476	152.087	126.688	105.28	86.3429	65.969	47.8093	36.6227	28.0899
496.06	27.821	20.654	22.7877	4.6782	21.4655	40.3783	44.9197	42.0813	0	0	0	0	23.6539	48.2405	109.462	154.192	180.742	187.176	173.958	153.156	127.637	106.597	104.298	105.592	116.531	132.123	137.144	148.622	157.466	167.084	174.567	189.221	197.846	201.545	207.703	220.567	221.863	217.795	208.791	192.171	171.011	151.575	125.974	104.125	85.4123	65.8493	47.1786	36.5127	28.2549
496.96	23.0186	20.3589	17.9637	2.06315	17.3722	39.4457	44.057	41.513	0	0	0	0	23.4562	47.8892	108.35	152.79	178.64	185.475	172.196	150.014	125.127	103.866	102.543	103.27	114.471	128.527	134.424	146.646	156.056	163.919	171.444	185.612	194.205	197.268	205.148	216.805	217.804	214.508	206.246	191.476	168.826	150.272	124.603	103.964	84.8014	65.5835	46.854	36.1588	28.1437
498.03	7.83076	16.9126	13.5671	18.8074	19.8263	40.1686	42.2575	39.5452	0	0	0	0	22.8616	46.7809	106.407	150.548	175.451	182.53	170.822	148.556	122.397	102.605	101.801	102.199	112.778	125.366	131.448	144.208	152.561	160.695	168.251	182.782	192.3	194.526	202.244	214.592	217.491	210.652	203.662	190.606	166.687	148.234	123.58	102.826	84.3928	65.296	47.0263	35.9823	28.1894
498.93	11.0808	15.4873	15.3998	20.0151	20.9869	40.058	41.698	38.3824	1.20515	0	0	0	21.5708	45.1867	104.774	149.468	172.351	178.697	167.049	146.613	119.472	101.991	100.808	101.376	111.455	121.917	129.28	141.111	148.845	158.96	165.08	180.031	189.893	191.872	199.365	212.138	214.397	208.15	201.43	187.298	165.77	147.121	122.561	101.887	84.2366	64.9315	46.9824	36.2151	28.2026
500	20.535	15.5919	18.8232	18.508	22.9445	39.6267	40.9654	38.0307	14.9931	0	0	0	20.6198	44.6042	103.768	147.918	168.802	177.527	164.117	145.836	117.605	100.31	98.6581	99.4343	108.61	119.83	127.762	137.559	146.868	155.926	162.609	177.382	187.589	189.349	196.962	208.845	210.746	205.489	199.684	183.927	163.713	145.589	122.072	100.842	83.6255	64.2733	46.6321	36.3038	28.3208
501.04	25.315	13.4285	20.6947	13.1708	25.6895	38.38	42.3617	38.2335	23.7268	0	0	0	19.8978	43.8981	102.561	144.19	166.808	175.555	163.327	142.812	115.626	97.6462	96.1927	96.4508	106.251	117.915	125.68	135.693	144.767	152.722	160.724	174.106	184.515	185.441	193.845	205.298	206.377	202.508	197.609	181.031	162.175	144.378	120.504	99.9366	82.6724	63.9958	46.3678	36.1358	28.2073
501.94	26.4011	22.9394	17.5104	7.85085	27.5032	40.6927	41.5832	36.9135	27.4617	0	0	0	18.3642	43.1003	100.243	141.044	164.536	172.728	161.178	141.047	113.665	95.5143	94.0835	94.99	103.842	115.721	123.557	132.839	141.764	149.673	157.243	171.195	182.176	181.719	190.121	202.072	203.987	201.333	194.78	179.709	160.643	141.774	119.107	98.8	82.1089	63.9184	46.6025	35.9232	28.204
502.98	32.3472	23.8929	26.3225	12.6252	23.3092	40.6701	41.1336	36.3649	27.7338	0	0	0	14.7571	42.5999	97.963	140.372	161.776	169.69	157.115	138.901	111.559	92.7736	92.1894	93.6495	101.964	113.129	121.331	129.977	138.037	146.633	154.427	167.843	177.31	178.426	186.972	198.118	201.64	197.965	190.87	178.187	159.384	140.162	117.639	97.7007	81.0326	63.5669	46.3268	35.8641	28.1697
504.02	23.7923	18.9822	30.2962	18.9072	23.287	37.1952	39.4245	35.3009	27.4264	0	0	0	9.82613	41.9263	97.4349	139.041	158.187	167.252	153.634	136.171	109.94	91.0677	89.5315	91.3281	100.039	111.166	118.614	127.537	135.474	143.774	152.438	164.866	172.976	175.074	183.691	195.787	199.372	194.464	188.031	176.079	157.17	138.096	116.699	96.8483	80.3926	63.1065	45.4847	35.6017	28.208
505.07	24.7602	5.79217	31.3283	17.1487	25.0429	36.9888	38.3153	35.2479	28.2042	0	0	0	4.64659	41.2185	96.1214	136.583	156.174	165.123	151.418	132.319	108.443	89.9829	87.4914	88.8712	97.5617	109.245	114.93	124.113	133.247	140.956	149.557	162.279	170.578	171.615	180.112	192.993	197.791	190.883	187.344	173.022	155.063	136.491	115.069	96.1286	80.0209	62.5883	45.2083	35.179	27.9989
505.97	20.2996	13.8261	18.7796	7.37151	24.728	38.9462	37.2724	33.5842	28.1514	0	0	0	0	40.0557	92.8274	133.472	155.068	161.28	149.647	129.467	107.164	88.8777	86.486	87.4116	95.5939	106.697	112.864	121.468	130.511	138.699	147.096	159.764	169.48	168.702	176.934	190.306	193.683	189.272	184.845	169.651	152.953	133.896	113.204	95.5833	79.5451	61.512	45.2247	35.1937	28.0508
507.01	27.3193	22.6822	22.0002	15.1233	20.7752	40.7782	37.8406	31.7335	27.2699	0	0	0	0	39.6137	90.9948	129.944	152.539	157.959	147.132	127.491	105.278	86.8888	85.4843	85.217	93.8729	105.426	111.108	120.07	127.343	136.568	144.323	155.854	166.566	166.369	175.46	187.679	189.988	186.256	180.956	166.965	150.227	132.363	111.953	94.6234	78.1602	60.925	44.9774	35.1188	28.1409
508.05	22.7182	19.6305	20.469	23.8339	19.1711	38.8595	37.8555	31.0293	27.0873	0	0	0	0	38.5409	91.2719	127.368	149.151	156.026	145.307	126.233	103.107	85.0834	83.3341	82.273	92.3619	103.429	108.806	118.62	124.328	133.257	141.693	152.808	163.079	165.659	172.51	185.051	186.458	182.706	177.112	164.819	147.979	131.06	110.856	93.1814	77.2544	60.8331	44.4659	34.9345	27.9756
508.95	24.5562	26.3403	14.2479	23.6553	19.6653	37.4495	36.695	30.359	26.638	6.50921	0	0	0	38.0247	90.0166	125.769	146.377	154.587	142.22	123.853	100.751	82.8115	80.9536	80.7266	90.0011	101.174	105.212	115.489	121.988	130.231	137.468	150.205	158.992	163.658	169.535	180.771	184.472	179.179	174.237	162.937	146.435	130.03	109.895	91.5056	76.5824	60.7894	44.0194	34.6183	27.5092
510	18.7557	28.7715	5.64522	18.5843	23.0014	35.4868	35.8913	29.2293	24.9541	12.1616	0	0	0	36.3	87.4553	124.791	143.229	151.844	139.209	121.353	98.267	81.4796	79.2349	79.8941	87.5324	97.6736	102.796	112.589	120.181	126.754	134.219	147.877	155.975	159.851	166.01	176.802	181.223	176.074	171.691	160.003	144.499	127.809	108.085	90.0569	75.8034	60.0003	43.3336	34.5441	27.4395
511.06	25.6495	25.7399	13.9566	16.717	24.9516	34.1565	33.6483	27.86	23.2892	15.0488	0	0	0	34.9834	86.0937	122.979	140.24	148.889	136.516	118.38	96.1377	79.9231	77.9761	78.7907	84.9244	94.6313	101.668	110.332	118.078	125.528	131.7	144.716	153.576	155.187	164.108	175.073	178.075	174.338	169.289	158.17	141.703	126.088	106.092	89.1027	75.3392	59.0753	43.0571	33.9199	27.4194
511.96	27.1402	20.0438	17.0202	16.5268	22.249	32.8103	32.5272	27.8768	22.5385	15.9605	0	0	0	33.5209	85.4696	120.613	138.766	145.858	134.873	116.673	94.533	78.9615	76.296	77.0155	83.2875	92.8332	99.3925	107.687	115.277	122.764	129.406	141.477	151.355	152.985	160.86	172.941	174.817	171.491	166.026	155.972	138.897	124.675	104.542	88.1497	74.5947	58.0301	43.0449	33.9005	27.2238
513.03	22.7055	29.025	15.4795	12.3325	21.1557	32.6618	32.8694	26.6187	21.7032	16.1128	0	0	0	30.9468	83.2474	117.338	137.029	143.873	133.131	114.205	93.4848	77.0151	74.3701	75.7306	81.6215	91.3949	96.9899	105.676	112.278	120.45	127.535	138.276	147.86	151.241	157.769	169.418	172.493	168.17	162.989	153.081	138.242	123.449	103.088	87.3909	73.5346	57.4144	42.4573	33.643	27.1831
513.93	15.3095	29.022	10.5282	6.80802	18.8341	33.5966	34.1109	25.9379	21.5331	15.1469	0	0	0	26.9028	81.2068	115.207	134.359	142.256	129.79	112.423	91.8068	75.0612	72.6661	73.9245	80.9934	89.6657	94.7791	103.253	110.266	118.057	125.314	136.431	144.974	148.886	154.178	165.864	169.467	165.28	161.784	148.692	135.746	121.706	102.053	85.8954	71.9684	56.9731	41.4897	33.7602	27.1451
515	12.8528	17.5043	15.645	7.36862	19.8633	32.9285	33.9579	25.241	20.6678	14.7937	0	0	0	20.1926	79.0848	113.003	131.401	139.339	126.753	110.364	89.582	72.6905	72.4257	72.6317	80.0957	86.8211	92.7565	100.957	107.711	115.72	122.308	133.863	141.968	144.745	150.863	162.838	165.257	163.397	159.734	146.53	132.608	119.077	100.032	84.6743	71.3143	56.6982	41.2364	33.49	26.7935
516.06	17.1138	8.88635	18.3659	11.411	15.7751	29.9075	33.0563	24.5127	19.5687	14.9969	0	0	0	10.6554	77.4322	110.882	129.389	135.205	123.916	108.257	86.8916	71.9503	70.6436	71.4742	78.1664	85.1656	89.6226	98.2879	105.227	112.069	118.361	130.758	138.659	140.92	148.206	159.791	161.079	161.337	157.056	146.408	129.688	116.703	98.7355	83.1063	70.1687	55.7688	41.6933	33.2255	26.5484
516.96	19.2704	11.066	13.7991	12.7917	18.0619	28.2007	31.0274	24.2574	18.844	14.9294	0	0	0	0	75.618	108.47	126.067	132.172	122.467	105.783	85.7079	70.679	69.1906	69.7496	75.0408	83.6118	88.4645	96.6957	103.28	109.341	114.967	127.518	136.255	138.08	145.732	156.678	158.863	156.942	153.885	144.573	128.489	114.117	96.9179	82.1548	69.4171	55.1541	41.7043	32.7226	26.6715
518.03	20.6215	19.0845	11.8048	7.28667	13.7132	28.5358	28.0067	23.9838	18.6001	13.9516	0	0	0	0	74.3675	106.645	123.11	130.192	120.309	103.192	84.2966	69.0097	67.1233	67.6291	73.5801	82.0062	86.9848	94.5412	101.66	107.445	113.511	125.005	133.543	136.263	142.993	153.898	157.143	154.159	151.221	141.722	126.449	113.067	95.8883	80.8699	68.3826	54.1452	41.1492	32.4718	26.6627
518.93	28.1303	18.5904	10.0359	1.72668	11.5615	28.7432	27.6469	23.1227	17.6843	13.2711	0	0	0	0	71.8644	104.922	121.4	127.182	118.132	100.79	83.0715	67.2047	65.9783	66.1547	72.0586	80.0035	84.9366	92.1755	99.3579	105.69	111.647	121.752	130.427	133.723	140.347	149.906	153.917	150.865	147.851	138.562	124.085	111.216	94.3732	79.7387	67.8304	53.5583	40.4638	32.3755	26.2343
520	18.8134	12.2573	9.79239	2.84644	12.3695	25.9531	27.5172	20.8365	16.7735	13.1623	0	0	0	0	69.223	102.218	119.302	124.463	115.472	98.9572	80.9289	66.224	63.6014	64.83	70.1307	78.2667	82.2331	90.2125	96.9856	103.183	108.615	119.497	127.58	130.837	136.968	146.72	150.134	148.317	145.695	135.762	122.036	109.276	93.0278	78.3642	66.6221	52.66	39.8799	32.3153	26.0507
521.04	8.4047	0	0	10.7273	14.3123	24.5016	27.2206	20.5127	15.9342	12.3832	1.16189	0	0	0	66.6794	99.3019	117.208	121.737	114.204	97.1728	78.9293	65.0265	62.2764	63.5397	68.5398	76.1898	81.1672	88.6596	94.1773	101.394	105.609	117.871	125.35	127.324	133.759	144.373	145.848	144.63	142.487	132.582	119.324	106.686	91.0466	77.535	65.3368	52.3245	39.2613	31.9136	25.9793
521.94	7.64416	0	0	7.9831	11.4366	24.5946	27.1653	20.1594	15.5031	11.84	3.56262	0	0	0	63.548	96.5466	114.488	119.274	111.999	95.2411	77.134	63.4947	60.7951	62.2798	67.1412	74.1207	78.9592	86.3044	92.4776	99.1722	104.236	115.332	123.052	124.217	130.521	142.34	143.277	142.853	139.041	130.358	116.963	105.2	89.3317	76.3977	64.1839	51.4857	38.6382	31.6625	25.8487
522.98	16.4823	0.95143	0	4.8547	7.22828	26.0744	27.5837	21.0242	14.8448	11.5939	4.91055	0	0	0	59.9796	95.727	112.301	116.885	109.458	93.4966	76.1095	61.788	59.7364	60.9618	65.8818	72.3651	76.9747	83.7359	90.6349	97.3605	103.075	112.231	120.407	121.257	127.923	138.978	140.663	140.235	136.368	128.354	114.794	103.689	87.6381	74.9685	63.4938	50.7737	38.0351	31.2704	25.6627
524.02	14.9069	6.21961	6.84693	1.58322	9.26072	24.7442	26.0777	21.5871	14.6494	10.9192	6.53289	0	0	0	54.8863	93.4747	108.728	115.207	106.283	92.1832	73.8855	60.3113	58.5549	59.3165	64.3088	71.551	74.7047	81.3496	88.8188	95.3838	100.854	109.718	118.011	119.114	125.926	135.263	138.318	137.245	134.168	125.745	113.164	101.548	85.8694	73.4997	62.6872	49.6992	37.5616	31.1349	25.5796
525.07	5.84727	0	4.22631	5.27052	13.7779	24.7925	24.8695	20.2167	14.1741	10.3163	7.32381	0	0	0	49.6866	91.4962	106.386	112.77	103.952	89.365	71.8579	59.759	57.7045	57.9385	62.9257	69.6593	73.8282	79.9534	86.278	93.4423	97.914	107.848	115.346	117.277	123.768	131.672	135.415	133.761	131.441	123.683	111.391	99.3213	84.2489	72.3731	61.7552	49.3241	37.325	30.7032	25.4501
525.97	0	0	2.02265	5.27877	15.1091	23.7068	24.2398	17.8048	13.44	9.46889	7.82382	0	0	0	42.5954	90.2047	105.122	109.874	101.201	86.8351	70.2289	58.1485	56.725	56.1844	61.1644	68.0302	72.2387	79.1994	85.0585	90.7606	95.6414	104.682	113.149	115.566	121.604	128.867	132.507	131.187	128.213	121.406	109.588	97.0597	83.4273	71.1439	60.7297	48.5499	36.9176	30.3495	25.2962
527.01	0	1.49635	0	5.16582	13.1273	22.292	23.852	17.1055	12.4051	8.3605	7.92896	0	0	0	32.8801	88.847	103.019	107.102	99.8944	84.9459	69.0637	56.5646	55.2949	54.2266	59.7847	66.0547	70.4403	77.7492	83.4321	88.697	94.171	101.899	109.953	111.729	118.089	126.196	128.61	128.878	125.753	118.436	106.952	95.3761	81.6576	69.4112	59.787	47.6514	36.2778	29.9266	25.1129
528.05	0	10.219	0	3.34852	9.64657	20.3267	22.3653	17.6285	11.8103	7.9148	7.27333	0	0	0	20.0778	86.9516	100.281	105.982	97.933	83.9352	67.4429	55.0035	53.3299	53.099	58.2611	64.5169	69.0579	75.1687	80.8448	86.6616	92.6388	100.333	107.232	108.584	115.41	124.327	125.587	126.162	122.744	115.092	104.055	93.9447	79.6332	68.1409	58.7151	46.5459	35.9605	29.8318	24.8351
528.95	0	0	0	0	9.54921	19.9588	22.861	17.6629	12.0378	8.28248	7.20236	0	0	0	5.22711	84.205	97.3889	103.522	95.8862	82.5654	66.4782	54.1291	52.0545	52.5531	56.5389	63.1851	67.6613	73.3821	78.5999	84.5889	90.2277	99.0601	104.907	106.337	112.816	122.421	123.748	123.134	119.994	112.844	101.856	92.4153	78.2367	67.3146	57.4962	46.0218	35.8204	29.7535	24.6979
530	3.38295	0	0	0	8.81882	20.6724	22.861	17.297	11.6578	8.70053	6.83624	0	0	0	0	81.8472	95.5699	100.829	93.2719	81.2531	65.3681	52.3592	51.5611	51.8471	54.8316	61.9705	65.7584	72.1819	77.0451	83.4859	86.879	96.6318	102.669	105.429	110.497	119.105	121.582	119.968	118.291	111.259	100.03	90.5223	76.9446	66.5254	56.3534	45.4274	35.0855	29.3269	24.3741
531.04	0	0	0	0	7.47713	21.0655	22.5407	16.7771	11.9013	7.87857	7.38629	3.28537	0	0	0	78.3574	93.1213	98.3861	91.1598	78.9404	63.7224	51.7537	50.6337	50.314	53.9916	61.1725	63.734	70.9184	75.3584	82.0587	84.7409	93.7745	100.055	103.213	108.275	115.59	118.795	118.042	116.199	109.276	98.3784	88.5099	75.206	65.2774	55.4872	44.8674	34.2177	28.4839	24.0044
531.94	0	0	0	0	4.99671	20.4201	21.3412	17.9508	12.1464	7.83417	7.74142	5.34887	0	0	0	75.6622	90.941	96.2074	88.7775	76.7162	61.7306	50.6879	48.7807	49.0614	53.6359	59.2641	61.7444	69.3349	72.5932	79.7622	83.1964	91.7402	97.8412	100.492	105.261	113.481	116.789	115.799	113.915	107.028	96.2747	86.8607	73.2474	63.7677	54.6354	44.3037	33.7443	27.8991	23.8077
532.98	0	0	0	0	4.25227	20.5394	21.3944	19.927	13.4152	7.72039	8.51336	7.29406	0	0	0	72.4043	89.1132	94.1696	86.8582	75.2782	60.0959	49.1362	47.0728	47.8864	52.9019	57.9718	60.4385	67.9851	71.2278	77.3785	81.2292	89.748	95.8108	97.5034	103.166	111.413	114.517	113.434	111.518	104.235	93.6121	85.7648	72.305	62.4185	53.539	43.3577	33.415	27.7314	23.7128
534.02	0	0	0	0	4.56874	20.4367	20.477	21.3716	14.4859	8.74179	8.92255	8.85795	0	0	0	67.8324	88.3288	92.4805	84.8049	74.037	59.3527	47.2216	46.2371	46.9403	50.7163	56.5086	59.2702	66.4502	69.7827	75.5418	78.7443	87.5704	93.1713	95.0602	101.454	108.752	111.35	110.557	108.794	100.859	91.6995	83.801	70.8322	60.9948	52.7987	42.554	32.7966	27.5296	23.2172
535.07	0	0	0	0	6.35384	19.2474	20.7817	21.2004	15.5197	10.1053	9.173	9.75969	0	0	0	61.7632	87.0214	90.5757	82.7078	72.0596	58.2829	46.8214	45.7757	46.1596	49.4476	55.8305	58.1918	64.5787	68.4881	72.7877	76.8447	85.3768	91.2216	93.4508	99.7199	106.408	108.637	107.88	106.194	98.457	90.3818	81.3721	69.4258	59.8478	51.9727	41.9217	32.4606	27.1538	22.7282
535.97	0	0	0	0	6.75529	18.2446	21.2674	20.6035	16.7434	12.0025	10.1339	11.5306	0	0	0	53.4071	84.7692	88.4469	81.2353	70.1789	57.0328	45.6009	44.8317	45.6068	48.2324	54.4565	56.4422	62.5707	66.7745	70.7063	75.5139	83.7126	88.9661	91.263	96.8097	104.682	106.515	105.397	104.352	96.5217	89.1693	78.3225	68.0494	58.9534	50.7298	41.157	31.9267	26.7747	22.4646
537.01	0	0	0	0	6.56867	18.7727	22.3445	20.4681	19.18	14.0246	11.4519	13.4637	0	0	0	42.1354	81.6023	85.874	78.9675	68.4578	55.4157	44.7916	43.2249	44.2299	47.7643	53.0272	55.5327	60.8181	64.9796	68.9939	73.7514	82.3059	86.7706	89.0257	93.6488	102.573	104.864	103.121	102.41	94.7978	86.8324	76.8614	66.8987	58.0484	49.8089	40.0423	31.2906	26.482	22.2877
538.05	0	0	0	0	5.44169	21.0274	22.8513	21.2858	21.2357	16.0012	13.7539	16.2088	0	0	0	27.8132	79.064	83.6097	77.6776	67.0747	54.0219	43.6862	41.7832	42.8529	46.3908	51.7299	54.8338	60.0154	62.5088	67.7283	72.388	80.0904	84.8582	86.9443	91.6196	99.6227	102.102	101.1	99.4415	92.9756	84.6809	75.2492	65.6269	56.9125	48.9022	39.4717	30.662	25.9911	21.9964
538.95	0	0	0	0	5.51987	22.5001	23.6161	24.535	22.4382	18.1267	15.48	18.8994	7.07859	0	0	9.99569	77.291	81.7404	75.5805	65.6091	52.3766	42.8417	41.513	41.9003	44.9482	50.1892	53.7519	58.486	60.7358	66.6853	70.4987	78.0374	83.5144	85.0274	89.9886	96.9393	99.5386	98.3594	96.7914	91.6599	82.9807	74.1149	64.2438	55.9045	48.1492	38.6437	30.1276	25.6279	21.788
540	0	0	0	0	6.89923	24.1452	23.552	25.9729	25.5747	21.6804	18.7493	22.7038	17.6425	0	0	0	75.4747	80.4642	73.7404	64.4425	50.6954	41.1593	40.6479	40.8943	43.4929	49.1453	51.8554	56.8975	60.0524	65.2962	69.4232	75.9036	81.2652	83.006	87.954	94.6095	96.352	95.8991	94.4647	89.478	80.6966	72.3303	63.0045	54.6652	46.939	37.7612	29.6134	25.2208	21.4928
541.04	0	0	0	0	7.5882	22.1133	25.0229	27.8611	29.7237	25.958	22.0584	26.5495	26.1286	0	0	0	72.9958	78.0546	71.7733	62.709	50.1358	40.5958	39.7363	39.2427	43.0909	47.8954	50.4928	54.7309	58.9841	64.0152	67.6543	74.3612	78.6062	80.7637	84.859	92.8218	93.966	94.046	91.9343	87.0693	78.1977	71.242	61.5931	53.2177	46.2058	37.0484	29.0715	24.7989	21.0919
541.94	0	0	0	0.565517	7.8604	22.367	27.3772	28.9914	33.8336	29.8899	26.0876	30.9001	33.1516	0	0	0	69.4959	75.4669	71.1032	60.7985	49.2185	39.1725	38.7741	38.1392	42.3581	47.1217	49.6977	53.4799	57.7324	62.0851	65.9642	72.3011	76.1736	78.8274	82.266	90.2769	92.3488	92.1613	89.83	85.1689	76.8011	69.6556	60.1889	51.5861	45.2459	36.9643	28.6653	24.1568	20.7634
542.98	0	0	0	0.307572	11.2243	23.6802	29.1663	32.2402	38.2552	34.3453	30.3024	35.9509	38.7444	0	0	0	65.4694	73.4725	69.4463	58.6643	48.1629	38.3863	37.8509	37.8386	41.4255	45.9871	48.7307	52.2183	55.9625	60.1432	63.8924	70.3024	74.4673	76.3028	81.0148	87.779	90.8955	89.7689	87.9717	83.3658	75.8762	68.2239	58.35	50.8168	44.5384	36.2722	27.7869	23.7679	20.4547
544.02	0	0	0	6.94456	14.3305	26.8448	30.9032	35.1676	44.2978	40.6182	36.2477	40.6452	44.791	0	0	0	58.6425	71.5766	67.1898	57.3538	45.9775	37.6721	36.6153	36.7225	40.4285	44.6005	47.8138	51.5266	54.6887	57.9409	62.3866	68.9306	72.9046	74.8334	79.6235	84.8922	88.6149	87.0629	85.8852	81.0746	74.1709	66.772	56.7023	49.8714	43.5218	35.1964	27.2104	23.233	20.1337
545.07	0	0	0	8.20937	16.1388	28.5849	31.9632	39.4526	49.4964	46.3389	41.5328	45.9458	49.6846	0	0	0	49.6576	69.4964	65.8958	56.4144	44.7251	36.9796	35.6767	35.4183	39.0486	43.0782	47.0969	50.228	53.068	56.729	60.7598	67.3564	71.8575	73.2598	77.426	83.4564	85.507	85.2154	83.2512	78.7288	72.2291	65.3582	55.9367	49.1042	42.2794	34.3634	26.7742	22.9106	19.5646
545.97	0.622891	0	0	16.6793	20.6038	30.0115	32.9498	41.3494	53.1597	50.8905	45.9101	49.6364	54.5819	0	0	0	38.4378	67.9819	64.617	55.6622	43.6265	35.6168	35.0427	34.6356	37.5889	41.568	45.719	49.1273	51.5383	55.7321	59.4278	65.6955	70.2539	71.7767	74.8687	81.6273	83.0387	82.9027	81.2584	77.3111	70.8423	63.5272	55.3542	47.9194	40.9881	33.7031	26.4909	22.2122	19.2394
547.01	6.98915	10.2141	6.73885	24.1212	26.2431	30.7026	33.8073	43.657	55.7723	55.0213	49.0625	53.4018	59.0819	12.8018	0	0	25.3564	66.5435	62.2926	53.7434	43.085	34.9876	33.6245	33.9196	36.4561	41.2468	43.6625	47.2088	49.8701	54.1582	58.2381	63.6624	68.5526	69.8662	73.1991	79.8464	81.1404	80.686	79.2682	75.5093	69.1992	61.569	53.9462	46.6563	40.0811	32.8936	26.1324	21.9463	18.866
548.05	15.6971	18.5045	13.4798	23.021	25.975	31.8648	35.9841	44.9692	58.385	58.6014	52.109	56.4101	62.6916	31.8898	0	0	10.3572	64.9869	60.5989	52.48	42.07	34.1533	32.8666	32.8277	35.6291	40.3719	42.4838	45.7238	49.1856	52.8276	56.6202	61.8681	66.4916	68.1798	71.7592	77.1907	79.6467	78.2479	77.7911	73.318	67.4881	60.9105	52.164	45.8031	39.3725	31.9413	25.7558	21.6349	18.5214
548.95	14.2347	18.2027	15.8384	22.0951	22.5068	33.2201	36.2281	46.9336	60.2293	59.8118	55.2949	59.754	65.6187	44.5809	0	0	0	63.2918	58.8004	51.1318	40.7384	33.5353	32.297	32.7114	35.341	39.9121	41.2652	44.9204	48.2675	51.122	55.1864	59.9371	64.9244	66.5496	69.8866	76.3294	77.7481	76.8241	76.1983	71.319	65.5442	59.9114	50.7827	44.9398	38.8735	31.4011	25.2284	21.2188	18.1831
550	12.153	23.1779	17.3825	24.1062	25.0736	33.4402	36.2334	46.3839	61.299	61.131	58.0331	60.7108	67.7393	55.222	0	0	0	61.4618	57.6053	49.8761	39.8686	32.5593	31.9435	32.1867	34.8657	38.4277	40.3808	44.0219	47.4306	50.3011	53.7002	58.296	62.8958	64.6156	67.6838	74.4545	75.6361	74.7356	74.6818	69.8718	63.3922	58.1635	49.6308	43.8194	38.0385	30.928	24.4285	20.8479	18.0207
551.04	0	17.2692	18.1096	22.9047	27.0449	31.7013	36.0734	47.3591	61.5707	62.8698	58.8252	62.0042	68.6877	61.7469	0	0	0	58.6461	55.5938	47.5499	38.7918	31.5031	31.0233	30.9763	34.1499	37.3608	39.2846	42.5167	46.3786	49.0457	52.0079	57.56	61.7166	62.8351	66.0453	72.133	74.1866	72.9715	72.4553	68.0883	61.4247	55.8192	48.4806	42.5062	37.1466	30.2493	23.6433	20.5833	17.71
551.94	12.2836	11.0794	14.2259	20.5664	28.0842	31.5972	36.5879	48.0762	63.386	65.7383	58.8686	62.3977	69.5612	64.9354	0	0	0	55.913	54.7005	46.3305	38.2799	30.9439	30.3257	29.4446	33.1582	35.8645	38.9082	41.0333	45.4472	47.76	50.1376	55.8769	60.5296	61.1004	64.6061	69.5269	72.2357	71.2632	70.9491	66.1536	60.1755	54.8527	47.5705	41.6724	36.0574	29.3857	23.1747	20.1756	17.3687
552.98	22.742	9.64202	14.3605	19.2235	27.7592	32.2767	37.1851	48.8799	65.9619	68.0769	59.8383	64.1458	70.6952	66.0791	0	0	0	52.7911	53.0101	45.4756	37.0178	30.4697	29.507	29.2758	32.2957	35.1386	37.9276	40.7769	43.7821	46.4602	49.3127	54.3103	58.9529	59.7149	62.5748	67.7588	70.0411	69.8471	68.8251	65.0645	59.1439	53.8082	46.5752	40.8071	35.5738	28.6557	22.8375	19.5876	17.1631
554.02	17.8232	12.3406	21.0972	17.8451	29.4566	33.1891	38.0285	49.1009	67.8819	68.7554	62.3567	64.9183	73.5308	68.3492	0	0	0	48.3024	52.1139	44.4773	36.0092	29.8093	28.847	28.8344	31.4733	34.3845	37.0222	40.3342	42.1953	45.2234	48.3774	52.8113	56.7528	57.9335	60.7516	66.4009	67.9611	68.4467	66.8505	63.6116	57.5983	52.608	45.2887	39.7164	34.7685	28.1025	22.3778	19.2483	16.8475
555.07	9.41232	6.53305	25.88	17.3414	28.6829	30.8078	38.1493	51.2541	70.1418	69.8332	64.7655	67.3944	75.0912	70.0101	0	0	0	41.514	50.0379	43.3763	34.6894	28.945	28.389	28.3117	30.6064	33.4653	35.6664	39.6385	40.923	44.2209	47.533	51.8865	55.7264	56.3343	59.2832	64.7723	66.4437	66.63	64.9777	62.05	56.3529	51.2585	44.2045	38.8021	33.9002	27.468	21.735	18.8137	16.3124
555.97	7.62728	7.74308	22.661	26.1646	27.376	32.04	39.6987	53.3495	71.7485	72.0501	66.5666	69.3126	77.2823	72.4899	8.46471	0	0	33.7647	48.6738	42.2743	34.3462	28.462	27.5467	27.2742	29.7364	32.6079	34.5375	38.3795	39.7064	43.3463	46.2107	50.0538	54.722	54.8681	58.1044	63.062	65.0294	64.7907	63.5141	60.2668	55.2507	50.1102	43.5167	37.96	32.9137	26.8461	21.4401	18.4047	15.9282
557.01	13.7459	10.6742	23.4011	29.7168	25.9269	33.0605	40.1055	53.2695	74.4437	76.3662	69.254	72.9858	79.8318	73.8064	30.0937	0	0	22.9756	46.7668	41.4329	33.2319	27.6508	26.2979	26.2633	27.9846	31.8469	33.5794	37.1568	38.8949	42.2137	44.6852	48.461	52.8046	53.485	56.8669	60.826	63.4516	62.6015	61.4864	58.7334	53.5918	48.9227	42.2441	37.0349	32.2913	26.2267	21.0489	18.033	15.6418
558.05	12.012	6.61773	23.1643	24.5101	26.916	34.9884	40.5886	52.8391	76.3214	78.7254	72.4729	75.424	83.3411	75.7657	45.7705	0	0	8.84845	45.9588	40.3522	32.3477	26.7353	25.707	25.1995	27.5154	31.1843	32.9701	35.9697	38.3625	40.6328	43.2234	47.4153	50.987	52.0066	55.3514	59.4646	61.8928	60.9743	60.1718	57.1709	51.5111	47.4911	40.942	36.1714	31.659	25.8562	20.5867	17.6838	15.4556
558.95	20.0664	1.55983	23.5573	22.8011	29.1575	35.7105	40.2358	55.0958	79.6908	80.8562	76.2311	77.842	86.4108	78.8972	56.1566	0	0	0	44.6155	39.3561	31.5479	25.6242	25.3775	24.6788	27.6639	30.5302	32.065	35.0724	37.6998	39.7783	41.8636	46.3714	49.3934	50.8817	54.0057	58.3475	59.5607	59.5594	59.0059	55.6787	50.4188	46.1716	39.8861	35.2463	30.7384	25.4581	20.057	17.4102	15.2842
560	22.0083	2.28103	26.1194	22.2736	33.8937	38.0761	42.8381	57.1725	80.8002	83.0783	78.3653	81.3282	89.1935	81.9472	62.9935	0	0	0	43.3081	38.0702	31.0264	24.488	24.6457	24.7565	27.7212	29.7095	31.2911	34.493	36.1866	39.0006	40.8387	44.8875	48.3118	50.0185	52.9452	57.0815	58.5377	58.4392	57.7134	53.9979	49.5268	45.0884	39.4926	34.1691	29.8486	25.0807	19.8788	17.1433	14.8874
561.04	22.9821	5.74951	33.2252	24.7543	36.8537	37.9706	44.166	58.538	84.006	86.2888	81.6375	84.3236	91.9379	83.8166	67.8131	0	0	0	41.2173	36.8213	29.8603	24.4076	23.8248	23.9522	26.8111	29.0932	30.7705	33.5905	35.2617	37.9611	39.902	43.7782	46.7487	49.1595	51.6764	55.4463	57.2639	56.3633	56.4088	52.3785	48.3687	44.2152	38.386	33.1988	29.3199	24.485	19.4267	16.7729	14.5468
561.94	17.9549	0	37.418	21.8656	37.264	38.7794	44.5727	60.227	85.0188	87.7034	83.4246	86.4851	92.8356	84.4462	70.7418	0	0	0	38.9972	35.6678	28.7955	24.2476	23.4164	23.226	25.5569	28.3273	30.5698	32.2994	34.7559	36.717	39.3323	42.6383	45.8134	47.3501	50.0973	53.6931	55.9559	54.2254	54.8295	51.011	47.0272	43.1179	37.2169	32.5622	28.9146	23.9065	19.0111	16.2555	14.324
562.98	21.9484	13.7979	33.6522	27.7279	36.5561	38.1987	44.2193	61.7918	86.1235	88.2411	84.1639	87.4048	93.0445	85.4685	72.6936	0	0	0	35.7424	34.6093	28.0622	23.8406	22.9965	22.815	24.6604	27.8556	29.6479	31.1877	34.0959	36.2958	37.9615	41.7047	44.3249	45.6901	48.6035	52.4632	54.0998	53.0102	53.2589	49.9145	45.8787	41.7057	36.1826	32.0137	28.1654	22.9921	18.3972	16.0375	14.2309
564.02	26.9446	13.9235	20.9809	23.9849	36.1661	38.3694	44.2922	61.197	85.4331	88.0227	82.7488	86.4811	92.2079	86.5646	74.2841	0	0	0	30.5604	33.4767	27.6531	22.8696	22.2947	22.5474	24.2397	26.7818	28.9068	30.2105	32.9372	35.0753	37.36	40.4137	43.4163	44.2494	47.3742	51.1838	52.7265	52.6745	50.9304	48.7601	44.4923	40.3542	35.4213	31.1352	27.2578	22.496	17.9579	15.4544	13.8411
565.07	18.4399	14.8103	16.8779	32.619	31.8208	38.5638	43.9795	59.4721	86.0212	87.527	82.1383	84.9222	91.5162	85.9245	75.263	0	0	0	23.8567	32.6938	26.9935	22.2953	21.4832	21.7299	23.9071	25.9194	27.9691	29.3324	31.9461	34.2276	36.3055	39.4754	42.323	43.2741	45.8226	50.0252	50.8065	52.0042	49.5528	47.5073	43.4849	39.0564	34.7312	30.3415	26.5874	22.055	17.56	15.1864	13.4669
565.97	12.6031	4.24003	19.504	25.342	30.9223	39.9727	44.1546	58.841	82.8984	86.8842	81.2025	83.9907	90.4406	84.8596	76.2133	0	0	0	15.5146	32.2438	26.0055	21.3583	20.6144	21.3207	22.8969	25.0832	27.6823	29.2224	31.1939	33.2154	35.0288	38.2575	41.71	42.1776	44.6958	48.4211	49.0515	50.3979	48.0559	46.2266	42.6028	38.5223	33.7236	29.4865	25.9573	21.6698	17.3222	14.6525	13.1143
567.01	16.8536	16.1851	21.1157	22.4012	34.7315	40.1966	44.1617	57.9781	80.1202	86.3689	80.4794	83.6023	89.6804	83.8046	76.464	10.874	0	0	4.72519	31.0267	25.4242	20.6517	20.3846	20.8488	22.0735	24.4284	26.7726	28.7554	30.0971	32.3591	34.0439	37.0584	40.2928	41.0355	43.5436	47.0837	47.7033	48.5085	47.4566	45.1571	41.7873	37.9456	33.1575	28.8391	25.4305	21.0216	16.7597	14.456	12.8758
568.05	21.5274	14.5685	23.3857	16.0812	36.8653	39.856	45.2007	57.9989	79.0543	84.9115	78.6686	80.9456	86.3349	83.2143	76.3427	28.7587	0	0	0	29.6801	25.3339	19.9984	20.3005	20.0526	22.0235	24.026	25.7887	27.5306	29.1265	31.829	33.8132	36.1713	38.7354	39.9467	42.3161	45.2206	46.9227	47.205	46.6037	44.3586	40.5326	37.4455	32.3403	28.361	24.8064	20.5787	16.1038	14.0266	12.6362
568.95	15.286	14.1504	20.7503	28.6448	32.2335	40.2087	44.7367	57.2599	79.5751	82.295	77.699	79.464	85.1028	81.1687	76.1654	42.8482	0	0	0	29.0972	24.7669	19.5919	19.6352	19.5824	21.5325	23.3605	24.6091	26.4115	28.4277	31.2008	32.7012	35.2744	37.4893	38.8397	40.9634	44.2581	45.9435	45.7378	45.8015	43.2045	39.3772	36.3318	31.27	27.5851	24.3186	19.7984	15.7098	13.9163	12.3212
570	8.21013	6.95136	15.514	33.3196	30.0572	39.3483	45.5783	56.1591	77.7936	80.1872	75.8273	78.3743	83.4629	80.3984	77.5425	52.5092	0	0	0	28.6118	23.6507	19.4118	18.7629	19.3545	20.7399	23.0254	24.0035	26.1572	27.7278	30.2869	31.6096	34.9128	36.781	37.9523	39.8436	43.3845	44.6039	44.3851	44.4662	41.8767	38.4018	34.906	30.1313	26.802	23.4704	19.2811	15.6603	13.8004	12.0362
571.02	6.66388	10.9616	9.2084	26.5315	33.2706	39.4863	44.5934	54.4342	76.5696	78.8893	75.3202	77.8063	82.9311	80.9915	79.1952	59.2916	0	0	0	26.6109	22.5503	19.2495	18.2465	18.435	20.4065	22.1047	23.0665	25.8073	27.0685	28.6794	31.0861	33.7851	35.9207	36.6267	39.1873	42.2536	42.8174	42.8548	42.669	40.5207	37.1462	33.7882	29.3336	25.9214	22.6978	18.8754	15.3131	13.4446	11.7586
572.05	6.66848	21.9525	17.6494	19.7488	33.7462	38.709	44.4597	54.0537	76.1135	79.3771	75.4706	77.0334	81.6367	80.749	79.1122	62.9009	0	0	0	24.1122	22.0112	18.5997	17.9385	17.9082	20.2563	21.6704	22.7371	24.935	26.4606	27.9407	30.4913	32.7155	34.7974	35.5329	37.7774	40.9575	41.8075	42.036	41.4568	39.2326	35.9585	33.1057	28.8537	25.2893	22.0994	18.5741	14.7196	12.9097	11.4331
572.94	11.9724	25.1421	19.1313	18.7459	33.6521	40.1949	44.8121	55.2522	76.4249	80.1331	77.2279	77.4077	83.4611	80.1545	78.7147	65.4649	0	0	0	21.668	21.3335	17.6214	17.1976	17.5841	19.4243	21.0743	22.3999	24.4955	26.0864	27.5906	29.166	32.0521	33.6805	34.5998	36.586	40.2128	40.6097	40.8879	40.7211	38.6114	34.722	32.274	27.9943	24.8361	21.7677	18.0712	14.3082	12.462	11.0745
573.97	3.75763	18.1993	20.2999	28.3546	31.7374	41.1852	46.4783	57.5028	76.5826	79.6558	76.9441	78.4756	84.6106	80.9899	80.7581	67.6362	0	0	0	17.8303	20.7287	16.9453	16.656	17.0159	18.3072	20.8717	21.6057	23.8617	25.0987	26.7541	27.8981	31.8348	32.9422	34.1425	35.6862	39.3196	39.8252	40.1509	40.0005	37.8138	34.2906	30.9909	27.5393	24.1937	21.2739	17.5973	14.1413	12.4305	10.9003
575	0	9.27709	21.3175	25.0288	32.3505	42.4832	46.4589	58.3626	77.7273	79.0746	75.729	79.6262	84.9743	82.9785	83.8097	69.994	0	0	0	11.3196	20.059	16.4661	16.174	16.0414	17.661	20.0569	20.534	22.7356	24.3831	25.7642	27.1178	30.6075	32.1125	33.2261	35.3801	37.5517	38.5391	39.154	38.61	36.8676	33.3487	30.2746	26.8301	23.3716	20.7097	17.0706	13.7789	12.1984	10.7741
576.02	0	8.14793	23.9749	28.5202	32.9133	44.3719	47.1279	57.1025	77.9929	79.1951	74.9766	80.4586	84.623	83.4999	86.2476	72.301	0	0	0	1.69592	19.71	16.1351	15.9112	16.0319	17.5564	19.4779	20.4952	21.79	23.3751	24.7613	26.6705	29.1876	31.1079	32.1133	34.0996	36.0663	37.829	38.3035	37.288	35.5426	32.2901	29.6147	26.0487	22.5768	20.1083	16.6101	13.3498	12.0255	10.4189
577.05	13.633	9.34303	14.7597	24.2542	36.9699	45.2635	48.5664	56.0727	77.0876	79.6263	75.1907	79.9425	85.4362	83.007	87.5953	74.8006	11.196	0	0	0	19.1946	15.77	15.183	16.1861	17.6069	19.0712	20.0796	21.618	23.0639	24.2232	25.9114	28.6364	30.0496	30.8442	32.9508	35.2172	36.6727	36.9239	36.2308	34.4391	31.1183	28.7619	24.9845	22.0168	19.7163	16.4331	13.082	11.7536	10.1794
577.94	15.8717	9.02407	17.2376	29.51	38.1256	47.4354	49.715	56.2232	75.7146	79.4275	74.9972	80.0618	86.2172	82.5275	88.3929	76.6101	29.2356	0	0	0	18.3658	15.2638	14.7344	15.6051	16.9362	18.6455	19.5976	21.2161	22.3275	23.546	25.1054	27.9006	29.7946	29.9923	32.122	34.8619	35.7694	35.6266	35.2836	33.4236	30.5557	27.895	24.4568	21.474	19.1242	16.0367	12.8154	11.5095	10.1353
578.97	18.2136	9.22006	16.3547	24.3365	39.1492	48.4918	50.2115	56.8058	75.3793	78.4814	74.9628	78.6436	83.9754	82.312	87.5008	78.8012	42.3695	0	0	0	17.3588	14.6561	14.5369	14.83	16.0843	17.8648	19.2126	20.6108	22.0214	23.148	24.1221	27.1953	29.2169	29.1451	31.4117	34.0359	34.5305	34.9564	34.2406	32.6523	29.9172	27.3031	24.0087	21.0937	18.7128	15.6893	12.5714	11.0697	10.0718
580	13.2449	14.0051	14.9079	26.6392	38.8112	48.8322	49.9942	55.5758	75.7021	77.049	73.7497	77.4862	82.1026	82.4362	87.7103	80.4673	52.5855	0	0	0	16.5752	14.1552	14.5763	14.5293	15.5891	17.326	18.7917	19.9823	21.017	22.821	23.6961	26.4709	28.4944	28.7732	30.4411	32.9243	33.5588	34.3587	33.2707	31.6916	29.1934	26.3936	23.2072	20.6755	18.2108	15.2816	12.402	10.7346	9.73918
581.02	18.3717	14.4294	17.4599	24.1396	39.8462	47.3996	48.7864	54.9309	75.0254	75.6372	71.7107	75.6415	82.0284	81.7561	87.6039	80.5292	59.8506	0	0	0	15.4386	13.8141	14.1813	14.2677	15.4333	16.8656	17.9263	19.134	20.8362	22.2105	23.3706	25.8358	27.306	27.9894	29.6499	31.9525	32.7073	33.2626	32.111	30.5763	28.2844	25.5943	22.4902	20.1513	17.8334	14.7965	12.1177	10.4357	9.50232
582.05	16.2924	18.3012	34.4094	26.1132	39.5451	48.4831	47.3034	54.1906	72.2433	73.7543	69.7118	74.8429	81.756	80.2295	88.3517	80.5131	63.3096	0	0	0	14.0865	13.5132	13.6224	13.9898	14.9423	16.431	17.0766	18.585	20.1191	21.464	22.8777	24.9397	26.2057	26.9337	28.9733	30.9546	31.7805	31.6307	31.4247	29.8948	27.3683	25.1868	21.9823	19.5462	17.3156	14.1573	11.6662	10.2514	9.20469
582.94	20.2213	21.181	30.4296	23.6982	38.793	49.3561	48.4873	54.1569	69.5361	72.0267	69.4486	71.8238	79.5157	78.6464	88.2847	81.8294	66.0911	0	0	0	11.6108	13.3249	13.1272	13.647	14.3447	15.9371	16.8479	18.5162	19.7871	20.853	21.8375	24.4749	25.3809	25.8631	28.2085	30.0174	30.8012	30.7527	30.6592	29.3733	26.6234	24.8173	21.5198	19.0988	16.8654	13.8666	11.3117	10.0429	8.97038
583.97	15.0373	21.3679	11.9058	20.4673	34.805	47.3288	48.837	52.4463	67.062	69.3887	68.2004	70.1388	77.1386	78.0467	88.2115	84.6603	67.3153	0	0	0	8.2792	12.5773	12.6024	13.0555	13.9034	15.7555	16.6143	18.5577	19.1072	20.46	21.1825	23.7304	25.0366	25.2656	27.2293	29.2393	29.941	30.0203	29.9752	28.6644	25.944	24.0329	20.7669	18.4855	16.3033	13.7327	11.1411	9.83522	8.70563
585	13.0822	13.0541	4.70673	19.3432	35.4823	46.3096	49.0597	50.5355	65.4937	67.587	65.2395	68.7166	75.0924	76.5065	86.9213	85.6951	69.3856	0	0	0	2.78856	12.0323	12.0752	12.359	13.5472	15.3968	16.2776	17.9114	18.3638	20.0888	20.7388	22.7658	24.7001	24.5674	26.3001	28.5067	29.0988	29.2617	29.059	27.8551	25.0097	23.1309	20.1661	17.9888	15.7983	13.4091	10.9448	9.63495	8.51674
586.02	16.6508	14.306	4.67	24.1651	36.5028	48.1441	47.6302	49.267	63.2429	65.022	62.555	67.5368	72.602	75.5544	86.2416	86.4739	70.0247	0	0	0	0	11.7376	12.0187	12.2403	13.2623	14.8768	15.6831	17.4823	18.0696	19.3847	20.0994	22.0173	24.0271	24.0531	25.5992	27.6327	28.1442	28.5926	28.3732	26.9386	24.051	22.4883	19.6349	17.3661	15.5805	12.8721	10.6455	9.27919	8.23229
587.05	14.8275	15.7453	15.4932	18.3591	36.9399	50.0208	47.9577	48.3409	60.5384	64.0642	60.5326	64.569	71.1388	73.7319	86.5611	86.4377	71.6194	10.0392	0	0	0	11.6255	12.0204	12.2627	13.0257	14.5318	15.5482	16.7556	17.5579	18.7215	19.3913	21.4901	23.2627	23.5345	25.0913	26.7638	27.5715	27.8082	27.3678	26.0896	23.5851	22.0673	19.2606	16.9712	15.2423	12.4736	10.3267	8.95895	8.05991
587.94	8.80937	24.3893	15.5399	11.8066	34.5748	49.4924	48.5205	46.6776	58.4034	62.115	58.6667	62.5601	69.0383	72.7408	85.9448	87.2821	72.4767	23.6696	0	0	0	11.2956	11.8001	11.881	12.9231	14.344	15.5085	16.1813	17.2127	18.3641	19.3893	20.8942	22.5022	22.9658	24.3381	26.3346	27.1068	27.0645	26.7097	25.1806	23.2634	21.3924	18.7094	16.5767	14.6383	12.2027	10.1153	8.76647	8.02175
588.97	17.2475	24.11	16.3757	10.9276	32.3414	49.1351	48.9034	45.2865	57.8743	60.4565	57.2102	60.7447	67.3655	70.8563	84.4632	87.9671	72.9936	33.6342	0	0	0	10.9635	11.3049	11.2794	12.3913	13.8057	14.9752	15.6621	16.2239	17.8269	19.0222	20.053	21.722	22.394	23.6169	25.688	26.6669	26.1655	26.0374	24.4894	22.8961	20.6901	18.2094	16.1754	14.247	11.8413	9.64504	8.63225	7.85428
590	19.9122	28.6652	8.40273	17.894	32.292	49.0629	48.1645	44.8493	57.5033	58.0521	56.1768	59.9015	65.9544	69.2891	84.936	89.1609	72.8472	40.27	0	0	0	10.0888	10.8275	10.7915	11.7381	13.2975	14.0858	15.5751	15.7898	17.2116	17.833	19.473	20.8632	21.5619	23.0122	24.6707	25.5654	25.412	25.2184	23.674	22.1436	19.9236	17.7244	15.7271	13.8918	11.4599	9.31048	8.3813	7.59926
591.02	10.182	21.0287	14.8986	22.0172	32.377	48.715	46.6601	44.7804	55.1487	56.1464	54.9543	59.2473	64.5564	67.3394	85.603	89.7493	73.4268	43.5496	0	0	0	8.68403	10.0426	10.501	11.2568	13.0665	13.3417	15.2312	15.101	16.3633	16.9849	19.0786	20.2527	20.7315	22.2993	23.9212	24.9492	24.4225	24.1662	23.2142	21.4897	19.3401	17.328	15.3332	13.5303	11.3031	9.03369	8.14705	7.29073
592.05	5.62863	20.5233	10.966	22.8989	33.6146	47.5307	46.4704	44.8988	53.0945	54.9194	52.8999	57.8808	62.848	67.019	85.3732	89.5	73.3645	45.8094	0	0	0	6.84977	9.6102	10.1427	11.3539	12.605	13.2462	14.6555	14.8317	16.1341	17.2726	18.633	19.8966	20.026	21.4225	23.2801	24.2812	23.6499	23.6345	22.7293	20.7335	18.7181	16.855	14.9523	13.1044	11.1968	8.97219	8.00474	7.14346
592.94	8.4249	12.6958	13.718	20.093	31.0423	49.2759	46.9604	44.5847	52.2869	54.7205	51.7811	55.7769	61.5128	66.3532	84.6567	88.5965	73.5383	46.9176	0	0	0	3.92596	9.27732	9.76634	11.024	11.9385	13.1288	14.1592	14.6255	15.8396	16.9902	18.1567	19.631	19.6575	20.886	22.7998	23.6856	23.3388	23.0645	22.2594	20.0966	18.4616	16.3135	14.6057	12.8897	10.8313	8.73364	7.84326	6.88696
593.97	10.2962	12.3266	12.2132	14.576	29.2387	49.3207	46.6163	43.3852	51.1307	54.0359	50.5887	53.8802	60.7192	64.7678	84.702	88.6308	74.3866	46.9441	0	0	0	0	9.05708	9.33639	10.7422	11.5543	12.5948	13.7928	14.466	15.5342	16.1937	18.084	19.2655	19.5263	20.3891	21.9721	22.7857	22.7417	22.6804	21.4867	19.5693	18.0164	15.8588	14.1779	12.6132	10.4039	8.59238	7.60665	6.75095
595	11.0074	17.3381	11.2307	19.7845	28.8273	48.9257	45.215	42.1808	48.9235	51.3289	49.9114	53.06	59.582	63.0902	83.3387	89.1186	75.6367	47.1652	0	0	0	0	8.51344	9.01048	10.3728	11.7126	11.9247	13.4366	14.3261	15.1319	15.5359	17.6192	18.7914	18.933	19.8176	21.5077	21.9992	21.7612	22.1015	20.7046	18.9889	17.3512	15.2608	13.7266	12.2796	10.0795	8.37973	7.26187	6.59274
596.02	6.6632	8.31748	4.86455	20.1573	31.5812	48.7504	44.6145	41.2839	48.0729	49.1406	48.6298	52.0222	58.0894	62.3206	82.4008	88.8293	75.46	47.6033	0	0	0	0	8.43302	8.80405	10.1215	11.5161	11.8681	13.0496	14.0711	14.7721	15.3279	16.8355	17.8357	18.2129	19.4002	20.7156	21.1456	20.9859	21.3783	20.21	18.5851	16.7759	14.8961	13.3557	12.0826	9.69727	8.22603	7.03589	6.43242
597.05	3.60154	12.7657	15.9186	17.8051	30.8583	49.5088	44.7669	41.1719	48.315	48.0539	47.0359	50.4267	56.6774	61.7007	82.1842	88.7485	75.3563	48.0903	0	0	0	0	8.24071	8.79909	9.80269	10.9442	11.6454	12.7861	13.6106	14.2924	14.9262	16.1886	17.1284	17.393	19.1443	20.3632	20.7787	20.5725	20.4777	19.7856	18.1017	16.5294	14.4936	13.2271	11.6708	9.56619	7.99175	6.85929	6.26168
597.94	9.47337	7.0311	19.7188	16.5709	30.4314	49.5969	44.318	39.9724	47.4142	47.2148	44.8719	49.2666	54.9502	61.0741	82.0205	88.8824	75.4073	47.7076	0	0	0	0	7.9579	8.5728	9.57132	10.4113	11.5645	12.4346	12.6967	13.6036	14.5231	15.9117	16.8161	17.1453	18.5957	19.8905	20.3975	20.5195	19.9888	19.1806	17.6488	16.1393	14.1241	12.9172	11.2411	9.39104	7.64702	6.72755	6.17174
598.97	15.7485	8.19771	11.0629	14.9617	32.499	46.6683	43.9185	40.1306	45.0321	46.0641	43.8139	47.7312	54.1597	60.3417	80.3024	88.1036	75.8266	47.8978	5.90856	0	0	0	7.08406	8.30479	9.32401	9.91815	11.3206	12.1668	12.3611	13.1813	14.235	15.4402	16.4893	16.5153	17.8626	19.2966	20.0154	19.8078	19.4043	18.5256	17.0119	15.6117	13.638	12.4973	10.7623	9.20403	7.34125	6.5669	6.01155
600	2.64216	1.6677	0	12.2988	35.2774	44.3706	43.4542	40.1666	43.8854	45.3294	42.9215	46.6116	53.1127	59.1023	79.7425	86.9145	74.6694	47.4895	14.2284	0	0	0	6.47821	8.05982	8.64455	9.70557	10.9998	11.608	12.0409	12.8173	13.8273	15.0613	15.9871	15.8632	17.4131	18.67	19.1312	18.9899	19.0318	18.0017	16.643	15.0055	13.4688	12.0299	10.5344	8.73054	7.18935	6.52106	5.90746
601.02	0	5.64515	2.33877	13.8465	34.4869	42.3413	43.7287	39.9037	42.3962	43.7175	41.8497	45.5249	51.6609	58.1435	79.4619	86.6012	73.3858	46.5586	18.3532	0	0	0	5.681	7.70702	8.52507	9.59299	10.4226	11.2609	11.5277	12.5708	13.4352	14.6886	15.2889	15.4962	17.0951	18.0992	18.5052	18.2749	18.697	17.4203	16.1995	14.593	13.2022	11.7513	10.3112	8.43916	7.09061	6.35178	5.74061
602.05	0	3.22863	15.0971	11.6454	27.7563	43.3149	43.597	37.8298	41.4929	42.3475	40.5372	44.3745	49.7531	57.1173	79.3035	86.6533	72.2259	46.2544	20.4125	0	0	0	4.59148	7.00019	8.25624	9.47235	10.1212	10.832	11.008	12.3135	12.8377	14.3	14.9276	15.2218	16.4913	17.5236	17.7249	17.8724	18.3295	16.9844	15.8225	14.3785	12.6921	11.4152	10.1666	8.26485	6.89699	6.14616	5.47087
602.94	7.71122	0	20.5961	5.54499	25.0201	44.5315	43.8102	35.9089	39.8998	41.5897	39.3744	43.1362	48.3876	55.8872	77.9996	86.0488	71.7953	46.1179	21.0402	0	0	0	2.29198	6.80456	8.41991	8.7096	9.96992	10.672	11.1366	11.9366	12.5783	14.0448	14.5892	14.9494	15.6244	16.9661	17.5225	17.6008	17.721	16.5625	15.3149	14.1678	12.2353	11.0038	9.77907	8.20991	6.73228	5.85984	5.21002
603.97	6.94188	7.97931	11.8502	11.105	27.7149	45.1207	42.234	34.8029	38.6203	40.9363	37.7647	41.637	47.2688	54.1421	76.9206	85.3238	71.1302	45.6291	21.1192	0	0	0	0	6.88898	8.09493	8.55585	9.67649	10.4062	10.9484	11.6522	12.3455	13.5671	14.3537	14.4428	15.1949	16.6202	17.0712	17.267	17.1191	15.9832	14.8148	13.7413	11.8743	10.7084	9.47275	7.99873	6.46608	5.80291	5.09038
605	3.14156	15.4577	8.08468	17.3741	33.4864	44.9839	41.0461	33.6909	37.9574	39.068	35.9655	39.2942	45.6883	53.0243	75.8873	84.3905	71.2795	45.0422	21.1605	0	0	0	0	6.58084	8.02801	8.634	9.52864	10.1832	10.5185	11.6522	12.0219	13.1245	13.6917	14.1389	14.9696	15.9534	16.4947	16.9691	16.303	15.4361	14.2274	13.0841	11.6018	10.4659	9.25452	7.6975	6.23488	5.68927	4.99432
606.02	0	14.9726	16.0644	20.6783	31.0286	43.1304	39.4179	34.0303	37.4939	37.4556	34.8483	37.6261	44.3999	52.0668	74.446	83.5291	70.176	45.2431	21.1182	0	0	0	0	5.92349	7.79978	8.72405	9.18748	9.81886	10.1743	11.3552	11.4945	12.5243	13.2332	13.4469	14.6639	15.2687	15.9891	16.2388	15.5193	15.0933	13.9269	12.71	11.3116	10.241	9.08667	7.55871	6.09583	5.49416	4.96781
607.05	0	4.84448	20.2489	15.1442	27.2648	42.2214	38.9044	33.4204	35.615	36.0012	34.3339	37.222	43.2718	51.2588	73.0544	82.8308	69.4503	44.3902	21.0604	0	0	0	0	5.95091	7.55392	8.29865	8.7792	9.32869	9.96708	10.9062	11.2562	12.285	12.8674	13.0951	14.1736	14.9224	15.877	15.5641	15.0064	14.7966	13.5942	12.4809	11.0989	9.85642	8.77172	7.37838	6.04757	5.25007	4.93514
607.94	6.58331	8.119	10.8807	16.5113	25.4438	40.7221	38.6246	32.1528	33.8262	35.0708	33.9702	36.9186	41.6894	49.7181	71.7349	81.2742	68.6613	43.8314	20.7505	0	0	0	0	5.8944	7.11907	7.95707	8.42799	9.24895	9.813	10.3867	10.8638	11.8706	12.5991	12.7336	13.712	14.6762	15.433	14.8986	14.8268	14.499	13.3248	12.1947	10.7232	9.58144	8.54023	7.15417	5.81097	5.20269	4.72859
608.97	9.3975	11.9091	8.86999	14.5783	26.7587	40.363	38.0405	30.5613	32.7788	34.3483	32.7778	35.132	39.9946	48.6428	70.7921	80.0718	68.5858	42.9729	20.1524	0	0	0	0	5.46654	6.71796	7.34464	8.09428	9.08817	9.59123	9.91498	10.4975	11.6781	12.3175	12.8457	13.3697	14.3006	14.8125	14.5709	14.6609	13.9924	12.8901	11.7102	10.4059	9.34493	8.36914	6.8656	5.6109	5.01372	4.54939
610	5.14523	9.66602	11.263	12.573	28.8247	40.3478	38.0523	29.8442	31.8282	33.1902	31.5121	34.4129	38.9622	47.6802	69.6696	78.8327	67.3876	42.4341	19.8625	2.97146	0	0	0	4.89083	6.50324	7.23688	7.94281	9.00556	9.11412	9.46729	10.3191	11.1673	12.0435	12.2083	12.8701	13.9767	14.1877	14.1973	14.2688	13.3904	12.4502	11.1567	10.1095	9.12891	8.09832	6.69897	5.50793	4.8665	4.52283
611.02	0	0.23412	17.4449	9.21111	29.4649	39.3938	36.358	29.7925	30.8001	31.4343	30.6668	33.7938	38.624	46.8024	68.6794	78.1183	66.5287	41.2198	19.4483	5.72469	0	0	0	4.40138	6.18178	7.19954	7.6077	8.33236	8.74229	9.35438	10.0004	10.8395	11.5482	11.6376	12.388	13.8181	13.6923	13.8247	13.7328	12.8611	11.8685	10.8827	9.81595	8.88972	7.82299	6.55707	5.47908	4.80676	4.51068
612.05	0	5.58002	12.611	10.3049	27.0999	38.2375	36.0466	29.8839	30.7639	30.4966	29.8779	32.6327	37.2293	45.0155	67.5327	76.7827	65.3131	40.9449	19.4406	7.11019	0	0	0	3.72722	6.16366	7.14314	7.30474	8.04631	8.47098	9.28092	9.55641	10.6576	11.1155	11.2602	11.8625	13.2038	13.4175	13.2106	13.3866	12.6009	11.4832	10.7283	9.50059	8.68139	7.57539	6.42691	5.33729	4.82799	4.32715
612.94	0.677136	2.89518	18.9753	16.4399	25.3137	37.3898	36.1215	28.9212	30.0021	30.2153	28.8035	30.9538	35.6894	43.7014	66.4835	75.1962	64.0966	40.2258	18.9351	8.16147	0	0	0	2.34108	6.23039	6.71939	7.08912	7.92404	8.3282	9.10553	9.30023	10.4146	10.8278	11.1672	11.5922	12.7909	13.2066	13.0318	13.0809	12.3481	11.1807	10.5462	9.25807	8.34239	7.41541	6.19095	5.18804	4.61902	4.14314
613.97	4.09133	0	12.6821	15.3375	23.6256	38.5373	36.4902	27.6079	29.0124	29.5187	27.5112	30.1071	34.4845	43.1991	65.3062	73.3819	63.7375	40.0882	18.8542	8.75234	0	0	0	0	6.10286	6.28555	7.06814	7.68986	8.17111	8.79851	9.30687	10.017	10.6167	10.7752	11.1437	12.3858	12.7953	12.8917	12.4641	11.8879	10.9041	10.1824	8.96684	8.01314	7.24589	5.98433	4.9698	4.45507	4.05248
615	2.70043	0	4.99533	15.3412	24.906	37.4668	34.7815	27.0511	27.5792	28.0318	26.7007	29.7921	33.6259	42.9812	63.9999	72.4041	62.8277	39.1877	18.158	8.84747	0	0	0	0	5.63464	6.19976	6.89409	7.21174	8.13984	8.34697	8.84805	9.63801	10.1425	10.4449	10.856	12.0208	12.011	12.9232	11.7997	11.5034	10.7603	9.82941	8.59799	7.77395	6.97822	5.80955	4.81497	4.35195	3.8841
616.02	0	5.44512	0	9.25338	23.3322	37.7983	32.2729	27.0167	26.7081	27.2412	26.0346	29.092	32.8302	41.8654	61.9621	71.729	61.0804	38.1008	17.702	8.40556	0	0	0	0	5.34188	6.16218	6.47213	7.0519	7.77677	8.11734	8.45411	9.54152	9.95909	9.87924	10.6721	11.5596	11.5349	12.2121	11.3438	11.1323	10.4553	9.60838	8.20424	7.55983	6.75302	5.70437	4.60998	4.23072	3.7972
617.05	0	2.85286	4.94624	4.87342	24.0262	37.4851	32.0316	26.3845	26.6842	26.8315	25.2932	28.0371	32.07	40.3718	60.043	70.723	58.7362	36.6645	17.0881	8.08138	0	0	0	0	5.12113	5.91911	6.55954	7.12602	7.60298	8.15773	8.24623	9.15657	9.60229	9.62706	10.4441	11.2128	11.224	11.5996	11.396	10.9737	10.1359	9.25908	8.05777	7.31781	6.59967	5.55297	4.53145	4.06897	3.72116
617.94	4.99395	5.88722	4.83412	0	23.2255	36.3305	31.6544	26.028	26.511	26.4661	24.5948	26.7991	31.5183	39.0303	59.4078	69.388	57.8065	36.2921	16.8233	7.95096	0	0	0	0	4.7554	5.44286	6.77727	6.76628	7.49596	8.04454	8.00545	8.7359	9.42714	9.45652	9.94519	10.7189	10.9562	10.8948	11.3089	10.543	9.56998	9.0613	7.89021	7.09348	6.40887	5.34898	4.4177	3.85831	3.63676
618.97	0	12.7991	0	2.36351	23.1564	33.1835	32.0272	24.8766	25.2898	25.2808	23.9545	26.1267	30.676	37.9296	58.9123	67.5679	56.6745	35.7931	16.7033	7.73232	0	0	0	0	4.02904	5.26552	6.39179	6.25108	7.37323	7.49511	7.76148	8.27489	9.10698	9.31364	9.47105	10.3971	10.6111	10.7466	10.8962	10.2921	9.41346	8.67296	7.70612	6.87151	6.14927	5.19274	4.33284	3.85758	3.39222
620	2.7796	11.017	0	5.5667	20.7244	32.3104	31.0086	23.3712	24.2534	24.07	22.9794	24.9981	30.3935	36.5049	57.2759	65.3942	55.587	34.78	16.2855	7.69179	0	0	0	0	3.63661	4.98612	5.921	5.92796	6.9464	6.88298	7.46949	8.05445	8.88645	8.89594	9.28696	10.175	10.4595	10.486	10.3284	9.98545	9.17032	8.46169	7.40779	6.73616	5.93332	5.0723	4.1764	3.80567	3.30744
621.02	5.25344	3.33993	2.50451	12.1007	20.4544	31.836	30.7076	22.4652	23.2663	23.0233	21.8765	24.3693	28.955	35.4962	55.2597	64.2453	53.922	33.8042	15.9493	7.50821	0.644295	0	0	0	3.2908	4.84451	5.86801	5.95909	6.49626	6.53531	7.56171	7.63739	8.59747	8.71093	9.34676	9.94874	10.0938	10.3605	9.92932	9.61404	8.93969	8.18532	7.08026	6.50406	5.78082	4.94051	4.08759	3.72117	3.29506
622.05	8.52751	0	11.7408	14.5911	18.5882	31.2005	29.1024	22.5661	22.4896	22.5184	21.4885	23.3871	27.482	34.5019	54.5599	63.5871	53.4807	33.1891	15.5038	7.27069	2.07067	0	0	0	2.24953	4.69627	5.73869	5.87373	6.00602	6.54328	7.23796	7.48587	8.29313	8.4873	9.33944	9.64858	9.71592	9.72252	9.67367	9.21583	8.59841	8.02928	6.87739	6.29536	5.57084	4.76597	3.98593	3.48446	3.26859
622.94	0	0	9.22502	12.1666	16.803	30.0234	29.024	22.7312	21.6713	21.9675	21.2349	23.146	26.1516	33.6343	53.8792	62.3793	52.347	32.7588	15.2512	7.06645	3.17163	0	0	0	0	4.75021	5.40186	5.85212	5.81066	6.57114	6.97996	7.3863	7.98158	8.08365	8.83309	9.51244	9.35729	9.26218	9.39209	9.09067	8.1719	7.68787	6.82287	5.9893	5.4103	4.66543	3.89893	3.41958	3.08669
623.97	0	3.31004	13.2034	8.16151	16.3896	29.5986	28.7959	22.1012	21.4515	21.4028	20.0706	22.3037	25.7649	32.3503	52.2597	61.0597	51.7466	31.9662	14.5744	7.19661	4.12628	0	0	0	0	4.44927	5.13371	5.58036	5.76485	6.58882	6.58969	7.30383	7.67257	7.75244	8.15649	9.1875	9.25525	9.00026	9.22333	8.81986	8.01172	7.45428	6.6885	5.97594	5.2606	4.52097	3.78667	3.29191	2.94414
625	8.08555	8.97085	14.0962	11.834	18.4126	28.2883	27.7323	20.792	20.8415	20.3603	19.5754	22.1527	25.2197	31.7033	49.8116	59.6638	50.058	30.896	14.2659	7.06349	4.16631	0	0	0	0	4.20176	5.19532	5.35346	5.64331	6.02049	6.5536	6.98765	7.50942	7.46323	7.87433	8.96061	9.0105	8.95004	8.7035	8.46654	7.67651	7.19371	6.42073	5.79659	5.10603	4.40568	3.66312	3.23825	2.8133
626.02	10.8059	0.279777	9.46456	14.4206	17.3642	27.8005	26.3561	19.9484	20.2387	19.7733	18.7761	21.0663	24.5627	31.2276	48.3369	57.85	49.3054	29.7829	13.8368	6.73433	3.97689	0	0	0	0	3.92591	4.90254	5.20371	5.39332	5.66203	6.22784	6.78925	7.31308	7.20103	7.84434	8.54133	8.69337	8.47225	8.35636	8.11517	7.52186	6.9363	6.05112	5.7098	4.8791	4.22615	3.4566	3.07775	2.72513
627.05	8.25581	2.62342	0	7.29363	16.2533	28.4615	25.3304	19.7019	19.2367	19.4124	18.2585	19.7577	23.8019	30.4565	47.2901	55.9561	47.9826	29.0385	13.8	6.49926	3.98885	0	0	0	0	3.65739	4.5458	5.12414	5.19981	5.54474	6.12076	6.63943	7.11437	7.08841	7.60671	8.22748	8.34027	8.11053	8.13264	8.06374	7.10712	6.6868	5.90421	5.44855	4.74152	4.11751	3.37579	2.99795	2.70268
627.94	4.44122	2.29514	0	4.22092	15.6327	28.4802	23.8474	19.4031	18.6736	18.8603	17.0536	18.6637	23.3149	29.4106	46.558	55.424	46.9874	28.3816	13.3877	6.43042	4.24057	0	0	0	0	3.57718	4.24237	4.85697	5.13048	5.79238	6.03011	6.38204	6.93674	6.96806	7.27946	8.13405	8.05003	7.87394	8.0942	7.85199	7.06189	6.4763	5.74735	5.24412	4.67014	3.91543	3.27423	2.92782	2.66929
628.97	0	4.27334	0	8.30217	17.1408	27.0333	22.8211	18.7328	18.5422	17.8554	16.486	18.8527	22.4339	28.549	45.2142	54.4466	45.2606	27.4367	13.0287	6.05555	4.15757	0	0	0	0	3.48758	4.27654	4.4253	4.98116	5.7052	5.94101	6.25731	6.63168	6.80147	6.901	7.87187	7.80326	7.84013	7.81923	7.66488	6.90019	6.28007	5.73768	5.02269	4.57523	3.77413	3.21151	2.90702	2.64799
630	0	1.15744	5.04425	12.5929	18.0294	24.7422	23.6081	17.3793	18.3626	17.2306	15.9815	18.9162	21.4455	27.5501	43.8594	52.7395	43.9354	26.8778	12.6695	6.00613	4.02037	0	0	0	0	3.32561	4.10666	4.13957	4.95364	5.65452	5.47478	6.00078	6.4325	6.60687	6.66478	7.39542	7.46189	7.63928	7.56398	7.23274	6.76978	6.1467	5.53406	4.88244	4.44033	3.61614	3.00298	2.79838	2.55364
631.01	0.270265	2.28951	9.531	12.9456	17.9409	23.935	23.5954	16.8176	17.2925	16.6395	15.7278	18.2474	20.745	26.7769	42.7649	50.4548	42.55	26.4969	12.168	6.00008	3.76553	0	0	0	0	2.507	3.85641	4.14991	4.53802	5.33433	5.02575	5.81726	6.27318	6.44675	6.69291	7.0794	7.22026	7.50139	7.28868	6.98947	6.56725	5.99388	5.3637	4.73948	4.30284	3.54254	2.93055	2.61829	2.49633
632.02	2.60001	2.32801	3.05058	12.1507	17.9883	23.0321	22.0509	16.6305	16.2664	16.2655	15.2983	17.376	20.1107	26.2457	41.858	49.4134	41.7909	26.0833	11.6102	5.9976	3.79479	0.774345	0	0	0	1.9896	3.50639	4.40855	4.32444	4.92571	4.76746	5.58067	6.00809	6.36875	6.73557	6.98147	6.98771	7.10792	7.11521	6.672	6.39148	5.6747	5.18905	4.56623	4.18965	3.4395	2.87042	2.55422	2.38087
[truncated: 16 more rows]
[truncated: 22 more columns]

## Sheet: Sonicated
Wave	200	205	210	215	220	225	230	235	240	245	250	255	260	265	270	275	280	285	290	295	300	305	310	315	320	325	330	335	340	345	350	355	360	365	370	375	380	385	390	395	400	405	410	415	420	425	430	435	440
[truncated: 397 more rows]
[truncated: 22 more columns]
