# Supplementary material for: Emergence of visible light optical properties of L-phenylalanine aggregates
Source: PeerJ. 2019 Feb 25;7:e6518. doi: 10.7717/peerj.6518 (PMC6394350; doi:10.7717/peerj.6518)
Supplement: Supplemental Information 7 [file peerj-07-6518-s007.xlsx]

## Sheet: Sheet1
Wave	Start	End		Start	End		Start	End
470	14.4126	30.1505		14.0901	36.2005		28.2108	76.3159
471.06	15.0434	32.3912		15.0466	38.0384		28.3865	80.7932
471.96	15.5775	35.6896		15.6016	39.6416		28.362	86.9855
473.03	16.2688	38.4932		15.7864	42.0744		28.5084	89.8476
473.93	17.2529	40.7376		16.228	45.448		29.0556	94.0998
475	17.9811	42.5756		16.7559	49.1435		29.7239	98.4322
476.06	18.3701	45.1505		17.2325	51.5349		30.2051	102.464
476.96	18.5875	47.5226		17.4189	53.0737		30.8385	106.025
478.03	19.1735	49.5507		17.6282	54.5149		31.9729	107.341
478.93	19.6352	52.7635		17.7906	57.7143		32.866	110.745
480	20.068	56.2115		18.5851	60.3288		33.8454	112.405
481.06	19.9401	58.1057		19.0096	61.8743		34.7015	117.114
481.96	20.1631	59.8181		19.2105	63.5547		35.7125	120.889
483.03	20.4161	62.4265		19.0613	65.6038		36.8375	122.61
483.93	20.8444	65.3784		19.4953	66.9022		37.7031	123.786
485	20.7209	64.9745		19.7843	66.8405		38.1732	124.615
486.06	20.7811	64.7297		19.8125	67.404		37.952	125.647
486.96	20.8503	64.0955		19.7027	67.5015		37.6494	124.045
488.03	20.8546	63.7403		19.6368	66.2436		37.1274	123.743
488.93	21.2246	61.6942		19.9249	64.3696		36.9919	121.406
490	21.1548	59.363		19.8212	62.7728		36.6768	119.224
491.06	20.8706	58.8944		19.898	62.0925		36.7251	116.541
491.96	20.5032	58.3941		19.8286	60.7802		36.3155	115.962
493.03	20.8392	58.5591		19.62	59.6652		35.9589	113.227
493.93	20.7535	56.4463		19.459	56.8735		34.8356	111.785
495	20.4153	56.6614		19.4162	53.7781		34.2731	109.835
496.06	20.1907	54.6988		19.2807	52.8946		33.9181	108.355
496.96	20.1345	53.5446		18.9558	52.1385		33.8121	106.845
498.03	19.8482	52.741		19.0687	51.6568		33.3651	105.004
498.93	19.6771	53.1591		19.2659	49.8495		32.5554	104.416
500	19.5829	50.8043		19.0178	49.7623		32.2251	101.999
501.04	19.8513	48.0331		18.6423	48.1644		32.414	99.9719
501.94	19.6286	47.0824		18.3111	47.2588		32.7331	96.7138
502.98	19.3728	46.5105		18.306	45.9018		32.0777	94.4873
504.02	18.9173	46.0095		18.3377	45.3444		31.3648	91.7254
505.07	18.8583	45.3933		18.2109	44.4034		30.9094	90.0496
505.97	18.9495	45.0082		18.1145	43.6466		30.9401	89.5919
507.01	18.7777	44.0881		17.7871	42.7742		30.5438	87.0519
508.05	18.2999	43.3161		17.5355	41.7709		30.1381	85.611
508.95	18.2175	42.9046		17.1633	40.016		29.1598	84.1649
510	18.2421	41.3447		16.9522	39.636		28.8965	82.9479
